# Supplementary material for: High Expression of ACOT2 Predicts Worse Overall Survival and Abnormal Lipid Metabolism: A Potential Target for Acute Myeloid Leukemia
Source: Hindawi journal article supplement (doi:10.1155/2022/2669114), 2022-09-23
Supplement: f1 [file 2669114.f1.zip]

| Gene Sym | Gene ID | Disease N              | Disease ID | Direct Evi  | Inference | Inference | Reference Count |
|----------|---------|------------------------|------------|-------------|-----------|-----------|-----------------|
| CDKN1A   | 1026    | Leukemia, MESH:D015470 |            | 15-deoxy-   | 106.51    |           | 166             |
| PARP1    | 142     | Leukemia, MESH:D015470 |            | 15-deoxy-   | 104.18    |           | 165             |
| CASP3    | 836     | Leukemia, MESH:D015470 |            | 15-deoxy-   | 99.67     |           | 173             |
| H2AX     | 3014    | Leukemia, MESH:D015470 |            | ABT-737 ε   | 96.99     |           | 150             |
| CCNB1    | 891     | Leukemia, MESH:D015470 |            | 15-deoxy-   | 93.82     |           | 86              |
| CASP8    | 841     | Leukemia, MESH:D015470 |            | 15-deoxy-   | 93.02     |           | 153             |
| TP53     | 7157    | Leukemia, MESH:D015470 |            | Air Polluta | 92.63     |           | 163             |
| AKT1     | 207     | Leukemia, MESH:D015470 |            | 15-deoxy-   | 91.95     |           | 113             |
| JUN      | 3725    | Leukemia, MESH:D015470 |            | 15-deoxy-   | 91.33     |           | 140             |
| MAPK3    | 5595    | Leukemia, MESH:D015470 |            | 15-deoxy-   | 88.3      |           | 96              |
| MAPK1    | 5594    | Leukemia, MESH:D015470 |            | 15-deoxy-   | 85.5      |           | 96              |
| RB1      | 5925    | Leukemia, MESH:D015470 |            | 15-deoxy-   | 85        |           | 101             |
| XIAP     | 331     | Leukemia, MESH:D015470 |            | 15-deoxy-   | 82.64     |           | 115             |
| TNFRSF10 | 8795    | Leukemia, MESH:D015470 |            | Alitretinoi | 81.91     |           | 126             |
| MCL1     | 4170    | Leukemia, MESH:D015470 |            | 2-(2-chlor  | 81.9      |           | 107             |
| BCL2L1   | 598     | Leukemia, MESH:D015470 |            | ABT-737 ε   | 78.88     |           | 136             |
| CDKN1B   | 1027    | Leukemia, MESH:D015470 |            | 15-deoxy-   | 78.6      |           | 100             |
| TOP2A    | 7153    | Leukemia, MESH:D015470 |            | Amsacrine   | 77.91     |           | 101             |
| FAS      | 355     | Leukemia, MESH:D015470 | marker/m   | 15-deoxy-   | 77.74     |           | 132             |
| CCNA2    | 890     | Leukemia, MESH:D015470 |            | 15-deoxy-   | 76.57     |           | 59              |
| MKI67    | 4288    | Leukemia, MESH:D015470 |            | 2-(2-chlor  | 76.57     |           | 70              |
| BAX      | 581     | Leukemia, MESH:D015470 |            | ABT-737 ε   | 75.67     |           | 158             |
| CCNE1    | 898     | Leukemia, MESH:D015470 |            | 15-deoxy-   | 75.34     |           | 83              |
| ABCB1    | 5243    | Leukemia, MESH:D015470 |            | Arsenic Tr  | 74.52     |           | 145             |
| BCL2     | 596     | Leukemia, MESH:D015470 | marker/m   | ABT-737 ε   | 74.47     |           | 159             |
| CASP7    | 840     | Leukemia, MESH:D015470 | marker/m   | ABT-737 ε   | 73.34     |           | 74              |
| KIT      | 3815    | Leukemia, MESH:D015470 | marker/m   | alvocidib ε | 72.81     |           | 71              |
| TNFSF10  | 8743    | Leukemia, MESH:D015470 | therapeuti | Air Polluta | 72.39     |           | 124             |
| IFNG     | 3458    | Leukemia, MESH:D015470 |            | 15-deoxy-   | 72.09     |           | 77              |
| CASP9    | 842     | Leukemia, MESH:D015470 |            | 15-deoxy-   | 71.89     |           | 116             |
| IL6      | 3569    | Leukemia, MESH:D015470 |            | 15-deoxy-   | 71.57     |           | 155             |
| CDK2     | 1017    | Leukemia, MESH:D015470 |            | 15-deoxy-   | 71.55     |           | 77              |
| VEGFA    | 7422    | Leukemia, MESH:D015470 |            | Air Polluta | 70.91     |           | 106             |
| BIRC5    | 332     | Leukemia, MESH:D015470 |            | alvocidib ε | 69.24     |           | 86              |
| CASP8    | 841     | Leukemia, MESH:D015473 |            | Aclarubicin | 68.66     |           | 280             |
| BIRC3    | 330     | Leukemia, MESH:D015470 |            | 15-deoxy-   | 68.65     |           | 75              |
| SERPINE1 | 5054    | Leukemia, MESH:D015470 |            | 15-deoxy-   | 68.59     |           | 87              |
| MMP9     | 4318    | Leukemia, MESH:D015470 |            | 15-deoxy-   | 68.36     |           | 75              |
| TNF      | 7124    | Leukemia, MESH:D015470 |            | 15-deoxy-   | 68.28     |           | 159             |
| BAX      | 581     | Leukemia, MESH:D015473 |            | 4'-methox   | 67.94     |           | 282             |
| PTGS2    | 5743    | Leukemia, MESH:D015470 |            | 15-deoxy-   | 67.83     |           | 157             |
| GADD45A  | 1647    | Leukemia, MESH:D015470 |            | Air Polluta | 67.71     |           | 137             |
| VDR      | 7421    | Leukemia, MESH:D015470 |            | Alitretinoi | 66.9      |           | 137             |
| MYC      | 4609    | Leukemia, MESH:D015470 | marker/m   | Amsacrine   | 66.66     |           | 100             |
| TXNIP    | 10628   | Leukemia, MESH:D015470 |            | Allopurinol | 66.64     |           | 75              |
| CCND1    | 595     | Leukemia, MESH:D015470 |            | alvocidib ε | 66.04     |           | 84              |
| MDM2     | 4193    | Leukemia, MESH:D015470 |            | alvocidib ε | 65.44     |           | 85              |
| CXCL8    | 3576    | Leukemia, MESH:D015470 |            | 15-deoxy-   | 65.43     |           | 106             |
| PRC1     | 9055    | Leukemia, MESH:D015470 |            | Air Polluta | 65.43     |           | 118             |
| TYMS     | 7298    | Leukemia, MESH:D015470 |            | Arsenic Tr  | 65.21     |           | 123             |
| CCND3    | 896     | Leukemia, MESH:D015470 |            | 15-deoxy-   | 64.88     |           | 126             |
| RPS6KB1  | 6198    | Leukemia, MESH:D015470 |            | 15-deoxy-   | 64.84     |           | 75              |
| NFKBIA   | 4792    | Leukemia, MESH:D015470 |            | 15-deoxy-   | 64.81     |           | 80              |
| SFN      | 2810    | Leukemia, MESH:D015470 |            | Arsenic Tr  | 64.74     |           | 119             |
| GADD45B  | 4616    | Leukemia, MESH:D015470 |            | Air Polluta | 64.55     |           | 61              |
| EGFR     | 1956    | Leukemia, MESH:D015470 |            | 2-(2-chlor  | 64.54     |           | 74              |
| RELA     | 5970    | Leukemia, MESH:D015470 |            | 15-deoxy-   | 64.18     |           | 151             |

|          |       |                            |              |       |     |
|----------|-------|----------------------------|--------------|-------|-----|
| CCND2    | 894   | Leukemia, MESH:D01marker/m | Arsenic Tr   | 63.82 | 50  |
| CASP3    | 836   | Leukemia, MESH:D015473     | 2-(2-chlor   | 63.82 | 284 |
| F3       | 2152  | Leukemia, MESH:D015470     | Air Polluta  | 63.72 | 85  |
| GPX3     | 2878  | Leukemia, MESH:D015470     | Androgen     | 63.55 | 63  |
| TNFRSF10 | 8797  | Leukemia, MESH:D015470     | Alitretinoi  | 63.05 | 70  |
| ERBB2    | 2064  | Leukemia, MESH:D015470     | Bortezomi    | 63.02 | 53  |
| INSIG1   | 3638  | Leukemia, MESH:D015470     | Air Polluta  | 62.93 | 67  |
| PTEN     | 5728  | Leukemia, MESH:D015470     | 15-deoxy-    | 62.92 | 139 |
| BCL2L11  | 10018 | Leukemia, MESH:D015470     | ABT-737 /    | 62.76 | 46  |
| CDKN1A   | 1026  | Leukemia, MESH:D015473     | alpha-Toc    | 62.69 | 283 |
| BCL2     | 596   | Leukemia, MESH:D015473     | 4'-methox    | 62.42 | 285 |
| CDK4     | 1019  | Leukemia, MESH:D015470     | Air Polluta  | 61.94 | 46  |
| RAD51    | 5888  | Leukemia, MESH:D015470     | Amsacrine    | 61.72 | 126 |
| CDK1     | 983   | Leukemia, MESH:D015470     | alvocidib /  | 61.57 | 66  |
| PARP1    | 142   | Leukemia, MESH:D015473     | 4'-methox    | 61.47 | 280 |
| TGFB1    | 7040  | Leukemia, MESH:D015470     | 15-deoxy-    | 61.43 | 94  |
| COL1A1   | 1277  | Leukemia, MESH:D015470     | 15-deoxy-    | 61.21 | 142 |
| CFLAR    | 8837  | Leukemia, MESH:D015470     | 15-deoxy-    | 60.61 | 56  |
| CASP9    | 842   | Leukemia, MESH:D015473     | 2-(2-chlor   | 60.41 | 284 |
| IFITM1   | 8519  | Leukemia, MESH:D015470     | Air Polluta  | 59.99 | 68  |
| CD274    | 29126 | Leukemia, MESH:D015470     | Arsenic Tr   | 59.85 | 45  |
| DDIT3    | 1649  | Leukemia, MESH:D015470     | 2-(2-chlor   | 59.71 | 72  |
| GDF15    | 9518  | Leukemia, MESH:D015470     | Alitretinoi  | 59.7  | 85  |
| ABCA1    | 19    | Leukemia, MESH:D015470     | Alitretinoi  | 59.47 | 57  |
| CDKN2A   | 1029  | Leukemia, MESH:D015470     | Air Polluta  | 59.4  | 93  |
| MAPK14   | 1432  | Leukemia, MESH:D015470     | Air Polluta  | 59.36 | 56  |
| FAS      | 355   | Leukemia, MESH:D015473     | 4'-methox    | 59.31 | 280 |
| PMAIP1   | 5366  | Leukemia, MESH:D015470     | ABT-737 /    | 59.29 | 69  |
| GSTM1    | 2944  | Leukemia, MESH:D015470     | 15-deoxy-    | 59.23 | 134 |
| STAT1    | 6772  | Leukemia, MESH:D015470     | 15-deoxy-    | 59.09 | 75  |
| CENPF    | 1063  | Leukemia, MESH:D015470     | Azacitidin   | 58.98 | 49  |
| NFKB1    | 4790  | Leukemia, MESH:D015470     | 15-deoxy-    | 58.9  | 70  |
| IGFBP3   | 3486  | Leukemia, MESH:D015470     | Alitretinoi  | 58.89 | 125 |
| HIF1A    | 3091  | Leukemia, MESH:D015470     | 15-deoxy-    | 58.86 | 141 |
| CD36     | 948   | Leukemia, MESH:D015470     | Alitretinoi  | 58.83 | 63  |
| RRM2     | 6241  | Leukemia, MESH:D015470     | Alitretinoi  | 58.83 | 105 |
| ABCG2    | 9429  | Leukemia, MESH:D015470     | Allopurinc   | 58.68 | 87  |
| FOXO1    | 2308  | Leukemia, MESH:D01marker/m | 6,7-dimet    | 58.65 | 56  |
| MGMT     | 4255  | Leukemia, MESH:D015470     | Air Polluta  | 58.56 | 52  |
| CDK6     | 1021  | Leukemia, MESH:D01marker/m | Arsenic Tr   | 58.47 | 59  |
| IL1B     | 3553  | Leukemia, MESH:D015470     | 15-deoxy-    | 58.1  | 86  |
| CYP3A4   | 1576  | Leukemia, MESH:D015470     | 2-(2-chlor   | 58.06 | 58  |
| STAT3    | 6774  | Leukemia, MESH:D01marker/m | 15-deoxy-    | 57.98 | 53  |
| IL4      | 3565  | Leukemia, MESH:D015470     | 15-deoxy-    | 57.56 | 68  |
| BID      | 637   | Leukemia, MESH:D015470     | ABT-737 /    | 57.48 | 121 |
| SERPINB2 | 5055  | Leukemia, MESH:D015470     | Air Polluta  | 57.33 | 55  |
| NQO1     | 1728  | Leukemia, MESH:D015470     | 2-(2-chlor   | 57.27 | 105 |
| CXCR4    | 7852  | Leukemia, MESH:D015470     | Arsenic Tr   | 56.76 | 133 |
| CDH1     | 999   | Leukemia, MESH:D015470     | 2-(2-chlor   | 56.56 | 52  |
| NAMPT    | 10135 | Leukemia, MESH:D015470     | Air Polluta  | 56.45 | 61  |
| ABCC1    | 4363  | Leukemia, MESH:D015470     | 15-deoxy-    | 56.44 | 130 |
| IGFBP5   | 3488  | Leukemia, MESH:D015470     | Androgen     | 56.35 | 108 |
| AR       | 367   | Leukemia, MESH:D015470     | Amsacrine    | 56.15 | 116 |
| TFAP2A   | 7020  | Leukemia, MESH:D015470     | Calcitriol C | 56.02 | 105 |
| BECN1    | 8678  | Leukemia, MESH:D015470     | ABT-737 /    | 55.79 | 46  |
| CDKN2B   | 1030  | Leukemia, MESH:D015470     | Arsenic Tr   | 55.78 | 81  |
| KDR      | 3791  | Leukemia, MESH:D015470     | Arsenic Tr   | 55.64 | 38  |
| TP53     | 7157  | Leukemia, MESH:D015473     | alpha-Toc    | 55.29 | 280 |

|          |       |                            |              |       |     |
|----------|-------|----------------------------|--------------|-------|-----|
| CCN2     | 1490  | Leukemia, MESH:D015470     | 15-deoxy-    | 55.25 | 58  |
| PMP22    | 5376  | Leukemia, MESH:D015470     | Cytarabine   | 55.23 | 102 |
| XRCC5    | 7520  | Leukemia, MESH:D015470     | Arsenic Tr   | 55.18 | 62  |
| ICAM1    | 3383  | Leukemia, MESH:D015470     | 15-deoxy-    | 54.94 | 79  |
| ABCC3    | 8714  | Leukemia, MESH:D015470     | 15-deoxy-    | 54.88 | 53  |
| VCAN     | 1462  | Leukemia, MESH:D015470     | Benzene E    | 54.72 | 64  |
| PLAU     | 5328  | Leukemia, MESH:D015470     | Arsenic Tr   | 54.36 | 54  |
| BBC3     | 27113 | Leukemia, MESH:D015470     | Arsenic Tr   | 54.31 | 107 |
| BCL2L1   | 598   | Leukemia, MESH:D015473     | alpha-Toc    | 54.31 | 277 |
| MCM5     | 4174  | Leukemia, MESH:D015470     | Arsenic Tr   | 54.24 | 41  |
| ATF3     | 467   | Leukemia, MESH:D015470     | Arsenic Tr   | 54.11 | 124 |
| BTG2     | 7832  | Leukemia, MESH:D015470     | alvocidib /  | 54.07 | 118 |
| VCAM1    | 7412  | Leukemia, MESH:D015470     | Arsenic Tr   | 53.9  | 137 |
| RELA     | 5970  | Leukemia, MESH:D015473     | 4'-methox    | 53.87 | 283 |
| MAPK14   | 1432  | Leukemia, MESH:D015473     | alpha-Toc    | 53.82 | 274 |
| BAK1     | 578   | Leukemia, MESH:D015470     | Arsenic Tr   | 53.67 | 56  |
| SGK1     | 6446  | Leukemia, MESH:D01marker/m | Arsenic Tr   | 53.51 | 46  |
| CDC25B   | 994   | Leukemia, MESH:D015470     | Arsenic Tr   | 53.51 | 43  |
| PPARG    | 5468  | Leukemia, MESH:D015470     | 15-deoxy-    | 53.41 | 149 |
| TNFRSF10 | 8795  | Leukemia, MESH:D015473     | alpha-Toc    | 53.33 | 275 |
| THBS1    | 7057  | Leukemia, MESH:D015470     | Air Polluta  | 53.31 | 107 |
| IL2      | 3558  | Leukemia, MESH:D015470     | Alitretinoi  | 53.27 | 68  |
| IL12B    | 3593  | Leukemia, MESH:D015470     | Alitretinoi  | 53.21 | 53  |
| ABL1     | 25    | Leukemia, MESH:D015470     | alvocidib /  | 53.17 | 57  |
| PCNA     | 5111  | Leukemia, MESH:D015470     | alvocidib /  | 53.02 | 70  |
| ABCC2    | 1244  | Leukemia, MESH:D015470     | Alkylating   | 52.7  | 83  |
| SP1      | 6667  | Leukemia, MESH:D015470     | 6,7-dimet    | 52.62 | 64  |
| ATM      | 472   | Leukemia, MESH:D015470     | Arsenic Tr   | 52.44 | 84  |
| EFEMP1   | 2202  | Leukemia, MESH:D015470     | Anthracyc    | 52.38 | 39  |
| SNAI2    | 6591  | Leukemia, MESH:D015470     | Arsenic Tr   | 52.33 | 119 |
| STAT5A   | 6776  | Leukemia, MESH:D015470     | Arsenic Tr   | 52.25 | 36  |
| E2F1     | 1869  | Leukemia, MESH:D015470     | alvocidib /  | 52.2  | 53  |
| IL10     | 3586  | Leukemia, MESH:D015470     | Air Polluta  | 52.11 | 67  |
| DCN      | 1634  | Leukemia, MESH:D015470     | Arsenic Tr   | 52.04 | 110 |
| ACTA2    | 59    | Leukemia, MESH:D015470     | Alitretinoi  | 51.87 | 62  |
| PIM1     | 5292  | Leukemia, MESH:D015470     | Arsenic Tr   | 51.83 | 56  |
| LUM      | 4060  | Leukemia, MESH:D015470     | Calcitriol C | 51.75 | 96  |
| HMOX1    | 3162  | Leukemia, MESH:D015470     | 15-deoxy-    | 51.71 | 106 |
| ABCC1    | 4363  | Leukemia, MESH:D015473     | Antimony     | 51.66 | 194 |
| IGF1R    | 3480  | Leukemia, MESH:D015470     | Air Polluta  | 51.49 | 54  |
| IRF7     | 3665  | Leukemia, MESH:D015470     | Arsenic Tr   | 51.2  | 62  |
| BIRC5    | 332   | Leukemia, MESH:D01marker/m | alvocidib /  | 51.19 | 277 |
| MMP2     | 4313  | Leukemia, MESH:D015470     | Androgen     | 51.14 | 68  |
| NR4A2    | 4929  | Leukemia, MESH:D015470     | Air Polluta  | 51.13 | 59  |
| BAD      | 572   | Leukemia, MESH:D015470     | 3-(2-(3-(1   | 51.04 | 52  |
| CCNG1    | 900   | Leukemia, MESH:D015470     | Arsenic Tr   | 50.78 | 117 |
| PDGFRB   | 5159  | Leukemia, MESH:D015470     | 6,7-dimet    | 50.69 | 104 |
| PPP1R15A | 23645 | Leukemia, MESH:D015470     | Arsenic Tr   | 50.68 | 74  |
| PECAM1   | 5175  | Leukemia, MESH:D015470     | 2-(2-chlor   | 50.66 | 39  |
| MCM7     | 4176  | Leukemia, MESH:D015470     | Arsenic Tr   | 50.54 | 46  |
| PTTG1    | 9232  | Leukemia, MESH:D015470     | Arsenic Tr   | 50.49 | 57  |
| UBE2C    | 11065 | Leukemia, MESH:D015470     | Amsacrine    | 50.49 | 106 |
| IFI6     | 2537  | Leukemia, MESH:D015470     | Arsenic Tr   | 50.3  | 51  |
| NFE2L2   | 4780  | Leukemia, MESH:D015470     | 15-deoxy-    | 50.28 | 64  |
| KRT8     | 3856  | Leukemia, MESH:D015470     | Alitretinoi  | 50.26 | 118 |
| CLU      | 1191  | Leukemia, MESH:D015470     | Arsenic Tr   | 50.24 | 65  |
| FN1      | 2335  | Leukemia, MESH:D015470     | Alitretinoi  | 50.24 | 45  |
| EGR1     | 1958  | Leukemia, MESH:D015470     | 15-deoxy-    | 50.14 | 71  |

|         |          |                        |              |       |     |
|---------|----------|------------------------|--------------|-------|-----|
| TPI1    | 7167     | Leukemia, MESH:D015473 | Antimony     | 50.08 | 269 |
| BIK     | 638      | Leukemia, MESH:D015470 | Arsenic Tr   | 50.05 | 48  |
| CASP1   | 834      | Leukemia, MESH:D015470 | Aclarubicin  | 49.85 | 53  |
| TNFSF10 | 8743     | Leukemia, MESH:D015473 | alvocidib/   | 49.84 | 279 |
| PDK1    | 5163     | Leukemia, MESH:D015470 | Arsenic Tr   | 49.81 | 45  |
| CDH2    | 1000     | Leukemia, MESH:D015470 | 2-(2-chloro  | 49.77 | 41  |
| DNMT1   | 1786     | Leukemia, MESH:D015470 | Alitretinoin | 49.77 | 54  |
| SOD2    | 6648     | Leukemia, MESH:D015470 | Arsenic Tr   | 49.73 | 85  |
| IKBKB   | 3551     | Leukemia, MESH:D015470 | Allopurinol  | 49.7  | 63  |
| FASLG   | 356      | Leukemia, MESH:D015470 | Arsenic Tr   | 49.65 | 74  |
| CCNG2   | 901      | Leukemia, MESH:D015470 | Arsenic Tr   | 49.62 | 62  |
| VDR     | 7421     | Leukemia, MESH:D015473 | arsenite[Ci  | 49.5  | 167 |
| BUB1B   | 701      | Leukemia, MESH:D015470 | Arsenic Tr   | 49.42 | 48  |
| PTCH1   | 5727     | Leukemia, MESH:D015470 | Androgen     | 49.4  | 35  |
| F13A1   | 2162     | Leukemia, MESH:D015470 | Arsenic Tr   | 49.35 | 48  |
| CDKN1B  | 1027     | Leukemia, MESH:D015473 | alvocidib/   | 49.34 | 273 |
| MMP1    | 4312     | Leukemia, MESH:D015470 | 15-deoxy-    | 49.32 | 53  |
| DIABLO  | 56616    | Leukemia, MESH:D015470 | alvocidib/   | 49.31 | 38  |
| FKBP5   | 2289     | Leukemia, MESH:D015470 | Arsenic Tr   | 49.18 | 53  |
| CTNNB1  | 1499     | Leukemia, MESH:D015470 | 2-(2-chloro  | 49.16 | 73  |
| CTH     | 1491     | Leukemia, MESH:D015470 | Arsenic Tr   | 49.1  | 65  |
| KRT19   | 3880     | Leukemia, MESH:D015470 | Alitretinoin | 49.06 | 111 |
| BNIP3   | 664      | Leukemia, MESH:D015470 | Arsenic Tr   | 49.02 | 58  |
| VEGFC   | 7424     | Leukemia, MESH:D015470 | Alitretinoin | 48.99 | 99  |
| VIM     | 7431     | Leukemia, MESH:D015470 | 15-deoxy-    | 48.94 | 74  |
| CHI3L1  | 1116     | Leukemia, MESH:D015470 | Air Polluta  | 48.89 | 37  |
| CASP2   | 835      | Leukemia, MESH:D015470 | Amsacrine    | 48.88 | 73  |
| CYCS    | 54205    | Leukemia, MESH:D015470 | alvocidib/   | 48.79 | 82  |
| FOS     | 2353     | Leukemia, MESH:D015470 | 15-deoxy-    | 48.79 | 74  |
| UGT1A1  | 54658    | Leukemia, MESH:D015470 | Alitretinoin | 48.73 | 48  |
| SPARC   | 6678     | Leukemia, MESH:D015470 | Air Polluta  | 48.7  | 112 |
| DDIT4   | 54541    | Leukemia, MESH:D015470 | Arsenic Tr   | 48.7  | 53  |
| FYN     | 2534     | Leukemia, MESH:D015470 | Azacitidine  | 48.68 | 100 |
| DUSP10  | 11221    | Leukemia, MESH:D015470 | Air Polluta  | 48.65 | 41  |
| SPP1    | 6696     | Leukemia, MESH:D015470 | 15-deoxy-    | 48.6  | 61  |
| AURKA   | 6790     | Leukemia, MESH:D015470 | Arsenic Tr   | 48.43 | 66  |
| FASN    | 2194     | Leukemia, MESH:D015470 | Alitretinoin | 48.38 | 70  |
| CXCL10  | 3627     | Leukemia, MESH:D015470 | Air Polluta  | 48.29 | 48  |
| GSTP1   | 2950     | Leukemia, MESH:D015470 | 15-deoxy-    | 48.26 | 72  |
| THBD    | 7056     | Leukemia, MESH:D015470 | Arsenic Tr   | 48.17 | 43  |
| TGFA    | 7039     | Leukemia, MESH:D015470 | Androgen     | 48.08 | 49  |
| GATA3   | 2625     | Leukemia, MESH:D015470 | Air Polluta  | 48.07 | 36  |
| GNPMB   | 10457    | Leukemia, MESH:D015470 | Arsenic Tr   | 48.07 | 44  |
| NOS2    | 4843     | Leukemia, MESH:D015470 | 15-deoxy-    | 48.05 | 77  |
| BTG2    | 7832     | Leukemia, MESH:D015473 | alvocidib/   | 48.01 | 276 |
| CCL2    | 6347     | Leukemia, MESH:D015470 | 15-deoxy-    | 47.93 | 86  |
| DUSP4   | 1846     | Leukemia, MESH:D015470 | Arsenic Tr   | 47.93 | 123 |
| IFIT3   | 3437     | Leukemia, MESH:D015470 | Arsenic Tr   | 47.93 | 47  |
| DNAJB1  | 3337     | Leukemia, MESH:D015470 | Air Polluta  | 47.91 | 50  |
| BST2    | 684      | Leukemia, MESH:D015470 | Air Polluta  | 47.88 | 104 |
| TEK     | 7010     | Leukemia, MESH:D015470 | Arsenic Tr   | 47.88 | 97  |
| COL1A2  | 1278     | Leukemia, MESH:D015470 | Alitretinoin | 47.82 | 109 |
| OCLN    | 1.01E+08 | Leukemia, MESH:D015470 | Arsenic Tr   | 47.78 | 35  |
| LMNB1   | 4001     | Leukemia, MESH:D015470 | Benzene[C    | 47.77 | 57  |
| APAF1   | 317      | Leukemia, MESH:D015470 | Air Polluta  | 47.64 | 63  |
| NR1H4   | 9971     | Leukemia, MESH:D015473 | alvocidib/   | 47.59 | 170 |
| OGG1    | 4968     | Leukemia, MESH:D015470 | Air Polluta  | 47.57 | 77  |
| ABCC4   | 10257    | Leukemia, MESH:D015470 | Arsenic Tr   | 47.49 | 42  |



|         |        |                        |              |       |     |
|---------|--------|------------------------|--------------|-------|-----|
| MCL1    | 4170   | Leukemia, MESH:D015473 | 2-(2-chloro  | 47.49 | 273 |
| BIRC2   | 329    | Leukemia, MESH:D015470 | 15-deoxy-    | 47.48 | 62  |
| CXCL1   | 2919   | Leukemia, MESH:D015470 | Air Polluta  | 47.46 | 49  |
| CSF2    | 1437   | Leukemia, MESH:D015470 | 15-deoxy-    | 47.43 | 55  |
| RRAS    | 6237   | Leukemia, MESH:D015470 | Arsenic Tr   | 47.31 | 100 |
| SREBF1  | 6720   | Leukemia, MESH:D015470 | Alitretinoi  | 47.27 | 60  |
| MYBL2   | 4605   | Leukemia, MESH:D015470 | Calcitriol[C | 47.2  | 30  |
| ISG15   | 9636   | Leukemia, MESH:D015470 | alvocidib[/  | 47.19 | 70  |
| RARA    | 5914   | Leukemia, MESH:D015470 | Antimony     | 47    | 282 |
| CD14    | 929    | Leukemia, MESH:D015470 | Air Polluta  | 46.98 | 45  |
| GCLC    | 2729   | Leukemia, MESH:D015470 | 15-deoxy-    | 46.96 | 74  |
| RRM2B   | 50484  | Leukemia, MESH:D015470 | Azacitidin   | 46.81 | 43  |
| TIMP1   | 7076   | Leukemia, MESH:D015470 | Arsenic Tr   | 46.8  | 121 |
| PLAT    | 5327   | Leukemia, MESH:D015470 | Alitretinoi  | 46.72 | 112 |
| ITGAM   | 3684   | Leukemia, MESH:D015470 | 2-(2-chloro  | 46.7  | 38  |
| ZMAT3   | 64393  | Leukemia, MESH:D015470 | Benzene[C    | 46.68 | 81  |
| SQSTM1  | 8878   | Leukemia, MESH:D015470 | 2-(2-chloro  | 46.66 | 49  |
| TRP53   | 22059  | Leukemia, MESH:D015470 | ABT-737[/    | 46.6  | 129 |
| CYP1A1  | 1543   | Leukemia, MESH:D015470 | Anthracyc    | 46.56 | 106 |
| JUN     | 3725   | Leukemia, MESH:D015473 | 2-(2-chloro  | 46.52 | 276 |
| CAV1    | 857    | Leukemia, MESH:D015470 | 2-(2-chloro  | 46.35 | 42  |
| TNFSF9  | 8744   | Leukemia, MESH:D015470 | Arsenic Tr   | 46.3  | 63  |
| FADS2   | 9415   | Leukemia, MESH:D015470 | Azacitidin   | 46.26 | 25  |
| ANTXR1  | 84168  | Leukemia, MESH:D015470 | Arsenic Tr   | 46.21 | 32  |
| ARHGEF2 | 9181   | Leukemia, MESH:D015470 | Air Polluta  | 46.21 | 28  |
| XRCC6   | 2547   | Leukemia, MESH:D015470 | Arsenic Tr   | 46.21 | 71  |
| CEACAM1 | 634    | Leukemia, MESH:D015470 | Calcitriol[C | 46.17 | 61  |
| PLK1    | 5347   | Leukemia, MESH:D015470 | Arsenic Tr   | 46.17 | 42  |
| PLK2    | 10769  | Leukemia, MESH:D015470 | Benzene[C    | 46.17 | 54  |
| GPX1    | 2876   | Leukemia, MESH:D015470 | Air Polluta  | 46.16 | 81  |
| IFIT1   | 3434   | Leukemia, MESH:D015470 | alvocidib[/  | 46.16 | 105 |
| XRCC1   | 7515   | Leukemia, MESH:D015470 | Benzene[C    | 46.16 | 120 |
| STAT1   | 6772   | Leukemia, MESH:D015473 | Antimony     | 46.12 | 272 |
| IRF1    | 3659   | Leukemia, MESH:D015470 | 15-deoxy-    | 46.08 | 50  |
| LITAF   | 9516   | Leukemia, MESH:D015470 | Arsenic Tr   | 46.06 | 43  |
| CAT     | 847    | Leukemia, MESH:D015470 | 15-deoxy-    | 46.01 | 100 |
| MAPK8   | 5599   | Leukemia, MESH:D015470 | 6,7-dimet    | 45.94 | 49  |
| CEBPB   | 1051   | Leukemia, MESH:D015470 | Alitretinoi  | 45.92 | 45  |
| NPM1    | 4869   | Leukemia, MESH:D015470 | Alitretinoi  | 45.85 | 58  |
| NR3C1   | 2908   | Leukemia, MESH:D015470 | 15-deoxy-    | 45.85 | 91  |
| TGFBR3  | 7049   | Leukemia, MESH:D015470 | Arsenic Tr   | 45.76 | 116 |
| GSTM1   | 2944   | Leukemia, MESH:D015473 | alpha-Toc    | 45.69 | 279 |
| RARB    | 5915   | Leukemia, MESH:D015470 | 15-deoxy-    | 45.47 | 49  |
| ABCC3   | 8714   | Leukemia, MESH:D015473 | Antimony     | 45.43 | 268 |
| CCNB2   | 9133   | Leukemia, MESH:D015470 | Arsenic Tr   | 45.43 | 37  |
| CRYAB   | 1410   | Leukemia, MESH:D015470 | Arsenic Tr   | 45.43 | 97  |
| HBEGF   | 1839   | Leukemia, MESH:D015470 | Alitretinoi  | 45.35 | 43  |
| ID1     | 3397   | Leukemia, MESH:D015470 | Air Polluta  | 45.35 | 41  |
| ATF4    | 468    | Leukemia, MESH:D015470 | 2-(2-chloro  | 45.33 | 55  |
| CDC25A  | 993    | Leukemia, MESH:D015470 | Arsenic Tr   | 45.25 | 71  |
| CDK1    | 983    | Leukemia, MESH:D015473 | alvocidib[/  | 45.22 | 271 |
| MAP2K1  | 5604   | Leukemia, MESH:D015470 | 2-(2-chloro  | 45.21 | 47  |
| MBP     | 4155   | Leukemia, MESH:D015470 | Air Polluta  | 45.21 | 54  |
| SRXN1   | 140809 | Leukemia, MESH:D015470 | Arsenic Tr   | 45.21 | 113 |
| HSPA1B  | 3304   | Leukemia, MESH:D015470 | Arsenic Tr   | 45.2  | 49  |
| IER3    | 8870   | Leukemia, MESH:D015470 | Calcitriol[C | 45.2  | 37  |
| MYB     | 4602   | Leukemia, MESH:D015470 | Air Polluta  | 45.2  | 35  |
| NPPB    | 4879   | Leukemia, MESH:D015470 | Azacitidin   | 45.2  | 112 |

|         |        |                            |              |       |     |
|---------|--------|----------------------------|--------------|-------|-----|
| ANGPT2  | 285    | Leukemia, MESH:D015470     | Arsenic Tr   | 45.18 | 58  |
| XBP1    | 7494   | Leukemia, MESH:D015470     | Air Polluta  | 45.16 | 50  |
| EDN1    | 1906   | Leukemia, MESH:D015470     | 15-deoxy-    | 45.15 | 121 |
| KLK3    | 354    | Leukemia, MESH:D015470     | Androgen     | 45.15 | 42  |
| PCK1    | 5105   | Leukemia, MESH:D015470     | 15-deoxy-    | 45.08 | 32  |
| MFGE8   | 4240   | Leukemia, MESH:D015470     | Azacitidin   | 45.04 | 41  |
| ASNS    | 440    | Leukemia, MESH:D015470     | Arsenic Tr   | 45.01 | 46  |
| SOD1    | 6647   | Leukemia, MESH:D015470     | Aclarubici   | 45.01 | 59  |
| EGFL6   | 25975  | Leukemia, MESH:D015470     | Arsenic Tr   | 44.99 | 94  |
| ISG20   | 3669   | Leukemia, MESH:D015473     | arsenite[C   | 44.96 | 165 |
| CSF1R   | 1436   | Leukemia, MESH:D01marker/m | Air Polluta  | 44.95 | 49  |
| LIF     | 3976   | Leukemia, MESH:D015470     | 15-deoxy-    | 44.88 | 51  |
| H2AX    | 3014   | Leukemia, MESH:D015473     | alpha-Toc    | 44.87 | 278 |
| KIF14   | 9928   | Leukemia, MESH:D015470     | Calcitriol[C | 44.83 | 25  |
| CD44    | 960    | Leukemia, MESH:D01marker/m | Arsenic Tr   | 44.82 | 123 |
| EGF     | 1950   | Leukemia, MESH:D015470     | 2-(2-chlor   | 44.81 | 71  |
| FASLG   | 356    | Leukemia, MESH:D015473     | alpha-Toc    | 44.78 | 272 |
| CASP7   | 840    | Leukemia, MESH:D015473     | alpha-Toc    | 44.73 | 269 |
| STAT5A  | 6776   | Leukemia, MESH:D015473     | 4'-methox    | 44.68 | 268 |
| TLR4    | 7099   | Leukemia, MESH:D015470     | Air Polluta  | 44.67 | 70  |
| STAT5B  | 6777   | Leukemia, MESH:D015470     | Arsenic Tr   | 44.66 | 30  |
| AKT1    | 207    | Leukemia, MESH:D01marker/m | alpha-Toc    | 44.65 | 277 |
| EDNRB   | 1910   | Leukemia, MESH:D015470     | Arsenic Tr   | 44.63 | 60  |
| FZD2    | 2535   | Leukemia, MESH:D015470     | Air Polluta  | 44.63 | 41  |
| PCSK9   | 255738 | Leukemia, MESH:D015470     | Arsenic Tr   | 44.63 | 31  |
| TNFAIP3 | 7128   | Leukemia, MESH:D015470     | Arsenic Tr   | 44.62 | 114 |
| DUSP1   | 1843   | Leukemia, MESH:D015470     | Androgen     | 44.59 | 47  |
| HMGB2   | 3148   | Leukemia, MESH:D015470     | Arsenic Tr   | 44.57 | 53  |
| DEPDC1  | 55635  | Leukemia, MESH:D015470     | Arsenic Tr   | 44.49 | 43  |
| GINS2   | 51659  | Leukemia, MESH:D015470     | Calcitriol[C | 44.49 | 26  |
| ST3GAL5 | 8869   | Leukemia, MESH:D015470     | Benzene[C    | 44.49 | 107 |
| LMNA    | 4000   | Leukemia, MESH:D015470     | Air Polluta  | 44.47 | 36  |
| TYMS    | 7298   | Leukemia, MESH:D015473     | Antimony     | 44.47 | 271 |
| TRIB3   | 57761  | Leukemia, MESH:D015470     | Arsenic Tr   | 44.44 | 50  |
| KLF2    | 10365  | Leukemia, MESH:D015470     | Arsenic Tr   | 44.41 | 53  |
| NDC80   | 10403  | Leukemia, MESH:D015470     | Arsenic Tr   | 44.41 | 97  |
| HK2     | 3099   | Leukemia, MESH:D015470     | Arsenic Tr   | 44.39 | 33  |
| KLF4    | 9314   | Leukemia, MESH:D015470     | Air Polluta  | 44.39 | 53  |
| KAT2B   | 8850   | Leukemia, MESH:D015470     | Arsenic Tr   | 44.36 | 38  |
| RFC3    | 5983   | Leukemia, MESH:D015470     | Azacitidin   | 44.36 | 29  |
| FGR     | 2268   | Leukemia, MESH:D015470     | Air Polluta  | 44.33 | 27  |
| ITPR1   | 3708   | Leukemia, MESH:D015473     | Arsenic[Ar   | 44.33 | 268 |
| CXCL12  | 6387   | Leukemia, MESH:D015470     | Arsenic Tr   | 44.32 | 61  |
| DLGAP5  | 9787   | Leukemia, MESH:D015470     | Bortezomi    | 44.3  | 34  |
| TMPO    | 7112   | Leukemia, MESH:D015470     | Arsenic Tr   | 44.3  | 30  |
| FDFT1   | 2222   | Leukemia, MESH:D015470     | Alitretinoi  | 44.23 | 66  |
| H4C3    | 8364   | Leukemia, MESH:D015470     | Arsenic Tr   | 44.16 | 94  |
| GSN     | 2934   | Leukemia, MESH:D015470     | Arsenic Tr   | 44.1  | 40  |
| MAD2L1  | 4085   | Leukemia, MESH:D015470     | Arsenic Tr   | 44.08 | 30  |
| TAP1    | 6890   | Leukemia, MESH:D015470     | Arsenic Tr   | 44.08 | 75  |
| CDKN3   | 1033   | Leukemia, MESH:D015470     | Arsenic Tr   | 44.01 | 49  |
| MPO     | 4353   | Leukemia, MESH:D015470     | Allopurinc   | 43.96 | 71  |
| MATN2   | 4147   | Leukemia, MESH:D015470     | Arsenic Tr   | 43.84 | 96  |
| AGRN    | 375790 | Leukemia, MESH:D01marker/m | Bortezomi    | 43.83 | 56  |
| CCL20   | 6364   | Leukemia, MESH:D015470     | Air Polluta  | 43.83 | 56  |
| CD69    | 969    | Leukemia, MESH:D015470     | Air Polluta  | 43.83 | 42  |
| CDKN1C  | 1028   | Leukemia, MESH:D015470     | Alitretinoi  | 43.83 | 113 |
| HSPA8   | 3312   | Leukemia, MESH:D015470     | Air Polluta  | 43.77 | 55  |

|          |       |                            |             |       |     |
|----------|-------|----------------------------|-------------|-------|-----|
| MMP10    | 4319  | Leukemia, MESH:D015470     | Alitretinoi | 43.76 | 34  |
| IL1RN    | 3557  | Leukemia, MESH:D015473     | Antimony    | 43.64 | 268 |
| ITGAM    | 3684  | Leukemia, MESH:D01marker/m | 2-(2-chlor  | 43.59 | 273 |
| CXCR4    | 7852  | Leukemia, MESH:D015473     | Arsenic Ar  | 43.59 | 277 |
| CYP3A4   | 1576  | Leukemia, MESH:D015473     | 2-(2-chlor  | 43.58 | 270 |
| KIF2C    | 11004 | Leukemia, MESH:D015470     | Azacitidin  | 43.54 | 30  |
| TOP2A    | 7153  | Leukemia, MESH:D015473     | Arsenic Ar  | 43.54 | 277 |
| ANXA2    | 302   | Leukemia, MESH:D01marker/m | Alitretinoi | 43.52 | 117 |
| CRKL     | 1399  | Leukemia, MESH:D015470     | alvocidib   | 43.52 | 25  |
| CCNB1    | 891   | Leukemia, MESH:D015473     | alvocidib   | 43.47 | 271 |
| TNFRSF1A | 7132  | Leukemia, MESH:D015470     | Air Polluta | 43.47 | 61  |
| CCL3     | 6348  | Leukemia, MESH:D015470     | Air Polluta | 43.45 | 61  |
| PLK4     | 10733 | Leukemia, MESH:D015470     | Arsenic Tr  | 43.45 | 31  |
| TPD52L1  | 7164  | Leukemia, MESH:D015470     | Arsenic Tr  | 43.45 | 34  |
| CDC25C   | 995   | Leukemia, MESH:D015470     | Arsenic Tr  | 43.37 | 47  |
| TFPI     | 7035  | Leukemia, MESH:D015470     | Benzene B   | 43.34 | 109 |
| CRISPLD2 | 83716 | Leukemia, MESH:D015470     | Air Polluta | 43.32 | 89  |
| EIF5A    | 1984  | Leukemia, MESH:D015470     | Arsenic Tr  | 43.32 | 39  |
| HNRNPD   | 3184  | Leukemia, MESH:D015470     | Air Polluta | 43.32 | 53  |
| ASS1     | 445   | Leukemia, MESH:D015470     | Arsenic Tr  | 43.29 | 48  |
| SAT1     | 6303  | Leukemia, MESH:D015470     | Arsenic Tr  | 43.29 | 41  |
| SELENOP  | 6414  | Leukemia, MESH:D015470     | Androgen    | 43.29 | 39  |
| TRIB1    | 10221 | Leukemia, MESH:D015470     | Azacitidin  | 43.23 | 37  |
| HSD11B1  | 3290  | Leukemia, MESH:D015470     | Alitretinoi | 43.22 | 29  |
| RHOA     | 387   | Leukemia, MESH:D015470     | Alitretinoi | 43.22 | 54  |
| SLC22A18 | 5002  | Leukemia, MESH:D015470     | Arsenic Tr  | 43.22 | 42  |
| COL6A3   | 1293  | Leukemia, MESH:D015470     | Arsenic Tr  | 43.2  | 96  |
| ESR1     | 2099  | Leukemia, MESH:D015470     | Alitretinoi | 43.15 | 102 |
| CEBPD    | 1052  | Leukemia, MESH:D01marker/m | Arsenic Tr  | 43.14 | 103 |
| DKK1     | 22943 | Leukemia, MESH:D015470     | Arsenic Tr  | 43.13 | 51  |
| F2R      | 2149  | Leukemia, MESH:D015470     | Arsenic Tr  | 43.12 | 46  |
| RHOB     | 388   | Leukemia, MESH:D015470     | Alitretinoi | 43.12 | 43  |
| KMT2A    | 4297  | Leukemia, MESH:D01marker/m | Arsenic Tr  | 43.08 | 99  |
| CLGN     | 1047  | Leukemia, MESH:D015470     | Arsenic Tr  | 43.07 | 30  |
| ERBB4    | 2066  | Leukemia, MESH:D015470     | Arsenic Tr  | 43.07 | 35  |
| DES      | 1674  | Leukemia, MESH:D015470     | Azacitidin  | 43.03 | 58  |
| IGFBP4   | 3487  | Leukemia, MESH:D015470     | Arsenic Tr  | 42.93 | 34  |
| CCL4     | 6351  | Leukemia, MESH:D015473     | Arsenic Ar  | 42.86 | 275 |
| APOD     | 347   | Leukemia, MESH:D015470     | Chloroqui   | 42.84 | 34  |
| NFAT5    | 10725 | Leukemia, MESH:D015470     | Allopurinc  | 42.84 | 42  |
| EZH2     | 2146  | Leukemia, MESH:D015470     | Arsenic Tr  | 42.83 | 33  |
| SDC4     | 6385  | Leukemia, MESH:D015470     | Air Polluta | 42.83 | 95  |
| DIAPH3   | 81624 | Leukemia, MESH:D015470     | Arsenic Tr  | 42.77 | 30  |
| ZMYND8   | 23613 | Leukemia, MESH:D015470     | Arsenic Tr  | 42.77 | 30  |
| IGFBP3   | 3486  | Leukemia, MESH:D015473     | Arsenic Ar  | 42.76 | 276 |
| BIRC2    | 329   | Leukemia, MESH:D015473     | Arsenic Tr  | 42.75 | 268 |
| DAPK1    | 1612  | Leukemia, MESH:D01marker/m | Air Polluta | 42.73 | 50  |
| ALDH1A1  | 216   | Leukemia, MESH:D015470     | Allopurinc  | 42.72 | 67  |
| STAT3    | 6774  | Leukemia, MESH:D015473     | 2-(2-chlor  | 42.66 | 271 |
| BRCA1    | 672   | Leukemia, MESH:D015470     | Arsenic Tr  | 42.63 | 52  |
| NUSAP1   | 51203 | Leukemia, MESH:D015470     | Arsenic Tr  | 42.63 | 32  |
| PPARD    | 5467  | Leukemia, MESH:D015470     | 15-deoxy-   | 42.63 | 70  |
| TP53I3   | 9540  | Leukemia, MESH:D015470     | Amsacrine   | 42.63 | 66  |
| P4HA1    | 5033  | Leukemia, MESH:D015470     | Arsenic Tr  | 42.6  | 41  |
| BNC2     | 54796 | Leukemia, MESH:D015470     | Arsenic Tr  | 42.57 | 97  |
| PDGFRB   | 5159  | Leukemia, MESH:D015473     | alpha-Toc   | 42.57 | 270 |
| CYP1B1   | 1545  | Leukemia, MESH:D015470     | Air Polluta | 42.51 | 91  |
| NCOA3    | 8202  | Leukemia, MESH:D015470     | Benzoates   | 42.48 | 23  |

|          |       |                            |              |       |     |
|----------|-------|----------------------------|--------------|-------|-----|
| POSTN    | 10631 | Leukemia, MESH:D015470     | Arsenic Tr   | 42.48 | 97  |
| TK1      | 7083  | Leukemia, MESH:D015470     | Arsenic Tr   | 42.36 | 105 |
| CGB3     | 1082  | Leukemia, MESH:D015470     | 15-deoxy-    | 42.34 | 17  |
| KCNJ2    | 3759  | Leukemia, MESH:D015470     | Air Polluta  | 42.34 | 76  |
| LDHA     | 3939  | Leukemia, MESH:D015470     | Arsenic Tr   | 42.34 | 29  |
| SLC20A1  | 6574  | Leukemia, MESH:D015470     | Air Polluta  | 42.34 | 34  |
| STK17B   | 9262  | Leukemia, MESH:D015470     | Arsenic Tr   | 42.34 | 34  |
| TNFSF11  | 8600  | Leukemia, MESH:D015470     | Amsacrine    | 42.34 | 47  |
| KRT18    | 3875  | Leukemia, MESH:D015470     | ABT-737 /    | 42.27 | 32  |
| CENPA    | 1058  | Leukemia, MESH:D015470     | Azacitidine  | 42.25 | 24  |
| FANCD2   | 2177  | Leukemia, MESH:D015470     | Arsenic Tr   | 42.25 | 31  |
| ITGB5    | 3693  | Leukemia, MESH:D015470     | Benzene C    | 42.25 | 109 |
| TMEM97   | 27346 | Leukemia, MESH:D015470     | Air Polluta  | 42.25 | 39  |
| MTHFD2   | 10797 | Leukemia, MESH:D015470     | Arsenic Tr   | 42.24 | 49  |
| CCNE1    | 898   | Leukemia, MESH:D015473     | alvocidib /  | 42.23 | 270 |
| AGT      | 183   | Leukemia, MESH:D015470     | 15-deoxy-    | 42.22 | 37  |
| FABP4    | 2167  | Leukemia, MESH:D015470     | 15-deoxy-    | 42.22 | 43  |
| NR1H4    | 9971  | Leukemia, MESH:D015470     | alvocidib E  | 42.22 | 80  |
| EPO      | 2056  | Leukemia, MESH:D015470     | Benzene E    | 42.2  | 58  |
| PPP1CB   | 5500  | Leukemia, MESH:D015470     | Arsenic Tr   | 42.2  | 41  |
| RB1      | 5925  | Leukemia, MESH:D015473     | alvocidib /  | 42.18 | 270 |
| WEE1     | 7465  | Leukemia, MESH:D015470     | Air Polluta  | 42.14 | 47  |
| HAS2     | 3037  | Leukemia, MESH:D015470     | Arsenic Tr   | 42.13 | 108 |
| TFPI2    | 7980  | Leukemia, MESH:D015470     | Decitabine   | 42.13 | 41  |
| HMGB1    | 3146  | Leukemia, MESH:D015470     | Arsenic Tr   | 42.1  | 124 |
| UHRF1    | 29128 | Leukemia, MESH:D015470     | Arsenic Tr   | 42.05 | 28  |
| GBP1     | 2633  | Leukemia, MESH:D015470     | Air Polluta  | 41.92 | 26  |
| PKP2     | 5318  | Leukemia, MESH:D015470     | Calcitriol C | 41.92 | 90  |
| TPD52    | 7163  | Leukemia, MESH:D015470     | Arsenic Tr   | 41.92 | 40  |
| LIG1     | 3978  | Leukemia, MESH:D015470     | Calcitriol E | 41.91 | 32  |
| VEGFA    | 7422  | Leukemia, MESH:D015473     | alvocidib /  | 41.91 | 277 |
| CDKN2B   | 1030  | Leukemia, MESH:D015473     | Antimony     | 41.9  | 271 |
| SMAD2    | 4087  | Leukemia, MESH:D015470     | 15-deoxy-    | 41.87 | 58  |
| BUB1     | 699   | Leukemia, MESH:D015470     | Calcitriol E | 41.86 | 41  |
| NT5E     | 4907  | Leukemia, MESH:D015470     | Arsenic Tr   | 41.86 | 39  |
| HSPB1    | 3315  | Leukemia, MESH:D01marker/m | 15-deoxy-    | 41.84 | 45  |
| ATF5     | 22809 | Leukemia, MESH:D015470     | Benzene E    | 41.79 | 42  |
| CREBBP   | 1387  | Leukemia, MESH:D015470     | Androgen     | 41.79 | 40  |
| NANOG    | 79923 | Leukemia, MESH:D015470     | ABT-737 /    | 41.79 | 31  |
| IL12A    | 3592  | Leukemia, MESH:D015470     | Alitretinoin | 41.78 | 42  |
| SAMHD1   | 25939 | Leukemia, MESH:D015470     | Air Polluta  | 41.78 | 24  |
| PPARGC1, | 10891 | Leukemia, MESH:D015470     | Alitretinoin | 41.75 | 50  |
| HIF1A    | 3091  | Leukemia, MESH:D015473     | alpinumisc   | 41.71 | 275 |
| SPINT2   | 10653 | Leukemia, MESH:D015470     | Arsenic Tr   | 41.69 | 31  |
| CTSH     | 1512  | Leukemia, MESH:D01marker/m | Arsenic Tr   | 41.68 | 103 |
| IGF1     | 3479  | Leukemia, MESH:D015470     | Alitretinoin | 41.68 | 65  |
| MAP1LC3  | 81631 | Leukemia, MESH:D015470     | ABT-737 /    | 41.67 | 43  |
| TMPRSS2  | 7113  | Leukemia, MESH:D015470     | Allopurinol  | 41.67 | 34  |
| CA12     | 771   | Leukemia, MESH:D015470     | Calcitriol C | 41.64 | 94  |
| COX11    | 1353  | Leukemia, MESH:D015470     | Air Polluta  | 41.64 | 21  |
| HSF1     | 3297  | Leukemia, MESH:D015470     | 15-deoxy-    | 41.64 | 45  |
| RGS1     | 5996  | Leukemia, MESH:D015470     | Air Polluta  | 41.64 | 103 |
| SP110    | 3431  | Leukemia, MESH:D015470     | Arsenic Tr   | 41.64 | 59  |
| FLT3     | 2322  | Leukemia, MESH:D01marker/m | Arsenic Tr   | 41.52 | 31  |
| H2BC5    | 3017  | Leukemia, MESH:D015470     | Arsenic Tr   | 41.52 | 36  |
| CCN1     | 3491  | Leukemia, MESH:D015470     | Arsenic Tr   | 41.51 | 34  |
| KEAP1    | 9817  | Leukemia, MESH:D015470     | Arsenic Tr   | 41.5  | 60  |
| FGFR3    | 2261  | Leukemia, MESH:D015470     | Calcitriol E | 41.49 | 25  |

|         |       |                            |              |       |     |
|---------|-------|----------------------------|--------------|-------|-----|
| BID     | 637   | Leukemia, MESH:D015473     | 4'-methoxy   | 41.48 | 274 |
| PHGDH   | 26227 | Leukemia, MESH:D015470     | Air Polluta  | 41.48 | 49  |
| ZWINT   | 11130 | Leukemia, MESH:D015470     | Arsenic Tr   | 41.46 | 29  |
| FSCN1   | 6624  | Leukemia, MESH:D015470     | Arsenic Tr   | 41.38 | 37  |
| SRGN    | 5552  | Leukemia, MESH:D015470     | Arsenic Tr   | 41.38 | 114 |
| CCN4    | 8840  | Leukemia, MESH:D015470     | Arsenic Tr   | 41.35 | 36  |
| BHLHE40 | 8553  | Leukemia, MESH:D015470     | Arsenic Tr   | 41.32 | 39  |
| CDKN3   | 1033  | Leukemia, MESH:D015473     | Antimony     | 41.32 | 264 |
| GCLC    | 2729  | Leukemia, MESH:D015473     | alpha-Toc    | 41.32 | 271 |
| HAS2    | 3037  | Leukemia, MESH:D015473     | Arsenic Ar   | 41.29 | 273 |
| CD38    | 952   | Leukemia, MESH:D015470     | 2-(2-chloro  | 41.25 | 30  |
| ZBTB16  | 7704  | Leukemia, MESH:D015470     | Busulfan C   | 41.25 | 29  |
| CEBPA   | 1050  | Leukemia, MESH:D01marker/m | 15-deoxy-    | 41.2  | 54  |
| HMGCS1  | 3157  | Leukemia, MESH:D015470     | Air Polluta  | 41.14 | 37  |
| BGLAP   | 632   | Leukemia, MESH:D015470     | 15-deoxy-    | 41.09 | 33  |
| CITED2  | 10370 | Leukemia, MESH:D015470     | Air Polluta  | 41.04 | 107 |
| FBLN1   | 2192  | Leukemia, MESH:D015470     | Arsenic Tr   | 41.03 | 98  |
| ALDOA   | 226   | Leukemia, MESH:D015470     | Arsenic Tr   | 41.02 | 33  |
| TGFBR2  | 7048  | Leukemia, MESH:D015470     | Arsenic Tr   | 41.02 | 40  |
| CARD6   | 84674 | Leukemia, MESH:D015470     | Air Polluta  | 40.99 | 25  |
| SULF1   | 23213 | Leukemia, MESH:D015470     | Arsenic Tr   | 40.99 | 32  |
| TJP1    | 7082  | Leukemia, MESH:D015470     | Arsenic Tr   | 40.97 | 41  |
| ERBB3   | 2065  | Leukemia, MESH:D015470     | Androgen     | 40.95 | 62  |
| RARA    | 5914  | Leukemia, MESH:D015470     | Alitretinoin | 40.94 | 45  |
| IL4     | 3565  | Leukemia, MESH:D015473     | Antimony     | 40.93 | 269 |
| LYN     | 4067  | Leukemia, MESH:D015470     | alvocidib E  | 40.93 | 100 |
| MVP     | 9961  | Leukemia, MESH:D015470     | Arsenic Tr   | 40.93 | 33  |
| RCAN1   | 1827  | Leukemia, MESH:D015470     | Calcitriol C | 40.93 | 40  |
| TLR3    | 7098  | Leukemia, MESH:D015470     | Arsenic Tr   | 40.93 | 44  |
| GLS     | 2744  | Leukemia, MESH:D015470     | Air Polluta  | 40.86 | 94  |
| SLC7A5  | 8140  | Leukemia, MESH:D015470     | Air Polluta  | 40.86 | 60  |
| EGR3    | 1960  | Leukemia, MESH:D015473     | Antimony     | 40.85 | 272 |
| RGCC    | 28984 | Leukemia, MESH:D015470     | Air Polluta  | 40.82 | 42  |
| SLC5A5  | 6528  | Leukemia, MESH:D015470     | Alitretinoin | 40.82 | 33  |
| SULF2   | 55959 | Leukemia, MESH:D015470     | Arsenic Tr   | 40.82 | 36  |
| TTK     | 7272  | Leukemia, MESH:D015470     | Azacitidine  | 40.82 | 32  |
| LPL     | 4023  | Leukemia, MESH:D015470     | 15-deoxy-    | 40.79 | 47  |
| CHEK1   | 1111  | Leukemia, MESH:D015470     | Arsenic Tr   | 40.78 | 53  |
| IRX4    | 50805 | Leukemia, MESH:D015470     | Calcitriol C | 40.78 | 65  |
| NDRG1   | 10397 | Leukemia, MESH:D015470     | Arsenic Tr   | 40.78 | 100 |
| VCAM1   | 7412  | Leukemia, MESH:D015473     | alpha-Toc    | 40.77 | 274 |
| CCND1   | 595   | Leukemia, MESH:D015473     | alpha-Toc    | 40.75 | 274 |
| GAPDH   | 2597  | Leukemia, MESH:D015470     | Alitretinoin | 40.74 | 109 |
| DSP     | 1832  | Leukemia, MESH:D015470     | Arsenic Tr   | 40.73 | 32  |
| GREM1   | 26585 | Leukemia, MESH:D015470     | Arsenic Tr   | 40.73 | 35  |
| HDAC4   | 9759  | Leukemia, MESH:D015470     | Arsenic Tr   | 40.73 | 62  |
| NRP1    | 8829  | Leukemia, MESH:D015470     | Calcitriol C | 40.69 | 99  |
| EDN1    | 1906  | Leukemia, MESH:D015473     | 2-(2-chloro  | 40.68 | 275 |
| C3      | 718   | Leukemia, MESH:D015470     | Androgen     | 40.65 | 35  |
| KIT     | 3815  | Leukemia, MESH:D01marker/m | alvocidib E  | 40.64 | 271 |
| TNFAIP3 | 7128  | Leukemia, MESH:D015473     | Antimony     | 40.64 | 273 |
| ABCB1   | 5243  | Leukemia, MESH:D015473     | alpha-Toc    | 40.63 | 274 |
| FEN1    | 2237  | Leukemia, MESH:D015470     | Azacitidine  | 40.62 | 37  |
| SESN1   | 27244 | Leukemia, MESH:D015470     | Arsenic Tr   | 40.62 | 47  |
| B2M     | 567   | Leukemia, MESH:D015470     | Air Polluta  | 40.6  | 96  |
| CD38    | 952   | Leukemia, MESH:D015473     | 2-(2-chloro  | 40.58 | 268 |
| CDC20   | 991   | Leukemia, MESH:D015470     | Arsenic Tr   | 40.57 | 32  |
| INPP4B  | 8821  | Leukemia, MESH:D01marker/m | Air Polluta  | 40.54 | 63  |

|         |        |                            |              |       |     |
|---------|--------|----------------------------|--------------|-------|-----|
| SOX2    | 6657   | Leukemia, MESH:D015470     | Arsenic Tr   | 40.52 | 40  |
| THY1    | 7070   | Leukemia, MESH:D015470     | Bortezomi    | 40.51 | 96  |
| XIAP    | 331    | Leukemia, MESH:D015473     | Aclarubici   | 40.44 | 271 |
| ADAMTS1 | 9510   | Leukemia, MESH:D015470     | Arsenic Tr   | 40.43 | 97  |
| IFNB1   | 3456   | Leukemia, MESH:D015470     | Allopurinc   | 40.41 | 47  |
| AKR1C3  | 8644   | Leukemia, MESH:D015470     | 15-deoxy-    | 40.39 | 59  |
| SUV39H1 | 6839   | Leukemia, MESH:D015470     | Bortezomi    | 40.39 | 19  |
| CASP10  | 843    | Leukemia, MESH:D015470     | Air Polluta  | 40.36 | 31  |
| DUSP2   | 1844   | Leukemia, MESH:D015470     | Arsenic Tr   | 40.36 | 53  |
| MYOF    | 26509  | Leukemia, MESH:D015470     | Air Polluta  | 40.36 | 93  |
| IL1RN   | 3557   | Leukemia, MESH:D015470     | 15-deoxy-    | 40.33 | 48  |
| CDK2    | 1017   | Leukemia, MESH:D015473     | alvocidib /  | 40.3  | 267 |
| RPS6KB1 | 6198   | Leukemia, MESH:D015473     | 2-(2-chlor   | 40.27 | 275 |
| IFITM1  | 8519   | Leukemia, MESH:D015473     | Arsenic ar   | 40.24 | 163 |
| ERN1    | 2081   | Leukemia, MESH:D015470     | Allopurinc   | 40.2  | 36  |
| PRKCD   | 5580   | Leukemia, MESH:D015470     | Arsenic Tr   | 40.2  | 72  |
| SCUBE2  | 57758  | Leukemia, MESH:D015470     | Arsenic Tr   | 40.18 | 25  |
| NPHS1   | 4868   | Leukemia, MESH:D015470     | Bezafibrat   | 40.11 | 50  |
| TRAF1   | 7185   | Leukemia, MESH:D015470     | Arsenic Tr   | 40.11 | 32  |
| FGFR1   | 2260   | Leukemia, MESH:D015470     | Arsenic Tr   | 40.09 | 37  |
| G0S2    | 50486  | Leukemia, MESH:D015470     | Arsenic Tr   | 40.09 | 33  |
| KPNA2   | 3838   | Leukemia, MESH:D015473     | Arsenic Ar   | 40.08 | 271 |
| NOS3    | 4846   | Leukemia, MESH:D015470     | 15-deoxy-    | 40.08 | 47  |
| RXRA    | 6256   | Leukemia, MESH:D015470     | 15-deoxy-    | 40.08 | 52  |
| NFKBIA  | 4792   | Leukemia, MESH:D015473     | alpha-Toc    | 40.07 | 272 |
| IL1A    | 3552   | Leukemia, MESH:D015470     | 15-deoxy-    | 40.01 | 51  |
| PRDX1   | 5052   | Leukemia, MESH:D015473     | Antimony     | 40.01 | 268 |
| ZEB1    | 6935   | Leukemia, MESH:D015470     | Arsenic Tr   | 40.01 | 37  |
| DUSP4   | 1846   | Leukemia, MESH:D015473     | Arsenic Tr   | 40    | 270 |
| IFIT3   | 3437   | Leukemia, MESH:D015473     | Arsenic Tr   | 40    | 267 |
| MTHFD1L | 25902  | Leukemia, MESH:D015470     | Arsenic Tr   | 39.99 | 35  |
| SH2D4A  | 63898  | Leukemia, MESH:D015470     | Calcitriol E | 39.99 | 15  |
| PRDM2   | 7799   | Leukemia, MESH:D015470     | Bortezomi    | 39.94 | 31  |
| RFTN1   | 23180  | Leukemia, MESH:D015470     | Dexameth     | 39.94 | 26  |
| CPT2    | 1376   | Leukemia, MESH:D015470     | Allopurinc   | 39.93 | 32  |
| IGFBP5  | 3488   | Leukemia, MESH:D015473     | alpha-Toc    | 39.93 | 271 |
| MYLK    | 4638   | Leukemia, MESH:D015470     | Arsenic Tr   | 39.93 | 36  |
| FOXA1   | 3169   | Leukemia, MESH:D015470     | Alitretinoi  | 39.88 | 29  |
| NABP1   | 64859  | Leukemia, MESH:D015470     | Arsenic Tr   | 39.88 | 31  |
| LCN2    | 3934   | Leukemia, MESH:D015470     | Alitretinoi  | 39.83 | 43  |
| PRKDC   | 5591   | Leukemia, MESH:D015470     | Benzene E    | 39.82 | 55  |
| RGS4    | 5999   | Leukemia, MESH:D015470     | Cytarabine   | 39.82 | 92  |
| SKP2    | 6502   | Leukemia, MESH:D015470     | Arsenic Tr   | 39.82 | 33  |
| CYP19A1 | 1588   | Leukemia, MESH:D015470     | Alitretinoi  | 39.81 | 37  |
| MAP1A   | 4130   | Leukemia, MESH:D015470     | Azacididine  | 39.8  | 21  |
| NOTCH1  | 4851   | Leukemia, MESH:D015470     | Arsenic Tr   | 39.78 | 50  |
| ENC1    | 8507   | Leukemia, MESH:D015470     | Arsenic Tr   | 39.76 | 64  |
| MAPK3   | 5595   | Leukemia, MESH:D015473     | 2-(2-chlor   | 39.76 | 277 |
| PRIM1   | 5557   | Leukemia, MESH:D015470     | Air Polluta  | 39.76 | 23  |
| RASSF1  | 11186  | Leukemia, MESH:D015470     | ABT-737 /    | 39.76 | 44  |
| EPHX1   | 2052   | Leukemia, MESH:D01marker/m | Arsenic Tr   | 39.75 | 66  |
| SOX4    | 6659   | Leukemia, MESH:D015470     | Arsenic Tr   | 39.72 | 35  |
| SLC2A4  | 6517   | Leukemia, MESH:D015470     | Alitretinoi  | 39.71 | 26  |
| SMAD2   | 4087   | Leukemia, MESH:D015473     | Arsenic Ar   | 39.68 | 273 |
| MT1X    | 4501   | Leukemia, MESH:D015473     | Antimony     | 39.67 | 271 |
| MAPK1   | 5594   | Leukemia, MESH:D015473     | 2-(2-chlor   | 39.65 | 277 |
| TERT    | 7015   | Leukemia, MESH:D01marker/m | Alitretinoi  | 39.64 | 53  |
| AMIGO2  | 347902 | Leukemia, MESH:D015470     | Dasatinib    | 39.64 | 23  |

|          |        |                            |              |       |     |
|----------|--------|----------------------------|--------------|-------|-----|
| ATP2B4   | 493    | Leukemia, MESH:D015470     | Decitabine   | 39.64 | 32  |
| ACACA    | 31     | Leukemia, MESH:D015470     | Arsenic Tr   | 39.58 | 55  |
| GJA1     | 2697   | Leukemia, MESH:D015470     | Arsenic Tr   | 39.53 | 63  |
| SMAD3    | 4088   | Leukemia, MESH:D015470     | Alitretinoin | 39.53 | 50  |
| AURKA    | 6790   | Leukemia, MESH:D015473     | Arsenic Ar   | 39.44 | 272 |
| ETS1     | 2113   | Leukemia, MESH:D015470     | Air Polluta  | 39.43 | 43  |
| PLPP3    | 8613   | Leukemia, MESH:D015470     | Arsenic Tr   | 39.43 | 47  |
| IL18     | 3606   | Leukemia, MESH:D015470     | Allopurinol  | 39.42 | 37  |
| CCL4     | 6351   | Leukemia, MESH:D015470     | Air Polluta  | 39.41 | 73  |
| IL1R1    | 3554   | Leukemia, MESH:D015470     | Benzene E    | 39.36 | 43  |
| LAMA2    | 3908   | Leukemia, MESH:D015470     | Alitretinoin | 39.36 | 33  |
| PLIN2    | 123    | Leukemia, MESH:D015470     | Arsenic Tr   | 39.36 | 40  |
| AIFM1    | 9131   | Leukemia, MESH:D015470     | 2-(2-chlor   | 39.35 | 34  |
| ITGA5    | 3678   | Leukemia, MESH:D015470     | Benzene C    | 39.34 | 47  |
| S100A4   | 6275   | Leukemia, MESH:D015470     | Arsenic Tr   | 39.28 | 103 |
| CFD      | 1675   | Leukemia, MESH:D015470     | Arsenic Tr   | 39.25 | 35  |
| EMP1     | 2012   | Leukemia, MESH:D015470     | Air Polluta  | 39.25 | 30  |
| RUNX2    | 860    | Leukemia, MESH:D015470     | 15-deoxy-    | 39.23 | 44  |
| DCBLD2   | 131566 | Leukemia, MESH:D015470     | Arsenic Tr   | 39.22 | 31  |
| SPHK1    | 8877   | Leukemia, MESH:D015470     | Bortezomi    | 39.15 | 58  |
| BDNF     | 627    | Leukemia, MESH:D015470     | Androgen     | 39.09 | 48  |
| PELI1    | 57162  | Leukemia, MESH:D015470     | Air Polluta  | 39.08 | 112 |
| H1-0     | 3005   | Leukemia, MESH:D01marker/m | Arsenic Tr   | 39.06 | 32  |
| BRCA2    | 675    | Leukemia, MESH:D015470     | Arsenic Tr   | 39.06 | 106 |
| FPR1     | 2357   | Leukemia, MESH:D015470     | Air Polluta  | 39.06 | 43  |
| MCM2     | 4171   | Leukemia, MESH:D015470     | Arsenic Tr   | 39.05 | 39  |
| APOBEC3  | 60489  | Leukemia, MESH:D015470     | Air Polluta  | 39.04 | 14  |
| HSPA5    | 3309   | Leukemia, MESH:D015470     | Allopurinol  | 39.01 | 56  |
| LY6E     | 4061   | Leukemia, MESH:D015473     | Arsenic Tr   | 38.97 | 265 |
| MCM6     | 4175   | Leukemia, MESH:D015470     | Arsenic Tr   | 38.97 | 40  |
| MALAT1   | 378938 | Leukemia, MESH:D01marker/m | Arsenic Tr   | 38.96 | 28  |
| TNF      | 7124   | Leukemia, MESH:D015473     | alpha-Toc    | 38.94 | 282 |
| NFE2L2   | 4780   | Leukemia, MESH:D015473     | 2-(2-chlor   | 38.92 | 274 |
| RELB     | 5971   | Leukemia, MESH:D015473     | Arsenic Ar   | 38.9  | 167 |
| CHCHD3   | 54927  | Leukemia, MESH:D015470     | Decitabine   | 38.88 | 26  |
| SERTAD1  | 29950  | Leukemia, MESH:D015470     | Benzene C    | 38.85 | 107 |
| PRC1     | 9055   | Leukemia, MESH:D015473     | Arsenic Tr   | 38.83 | 270 |
| CYP26A1  | 1592   | Leukemia, MESH:D015470     | Alitretinoin | 38.82 | 42  |
| NGF      | 4803   | Leukemia, MESH:D015470     | Calcitriol C | 38.82 | 36  |
| UCP2     | 7351   | Leukemia, MESH:D015470     | Arsenic Tr   | 38.82 | 45  |
| ATG5     | 9474   | Leukemia, MESH:D015470     | Arsenic Tr   | 38.74 | 37  |
| PLPP2    | 8612   | Leukemia, MESH:D015470     | Arsenic Tr   | 38.71 | 35  |
| SERPINE2 | 5270   | Leukemia, MESH:D015470     | Calcitriol E | 38.7  | 33  |
| INS      | 3630   | Leukemia, MESH:D015470     | 15-deoxy-    | 38.68 | 46  |
| HMGA2    | 8091   | Leukemia, MESH:D015470     | Arsenic Tr   | 38.63 | 39  |
| LEF1     | 51176  | Leukemia, MESH:D015470     | Air Polluta  | 38.61 | 31  |
| COL3A1   | 1281   | Leukemia, MESH:D015470     | Benzene C    | 38.59 | 115 |
| TNC      | 3371   | Leukemia, MESH:D015470     | Azacitidine  | 38.59 | 46  |
| MAFF     | 23764  | Leukemia, MESH:D015470     | Arsenic Tr   | 38.57 | 56  |
| ERMP1    | 79956  | Leukemia, MESH:D015470     | Calcitriol E | 38.54 | 25  |
| GSK3B    | 2932   | Leukemia, MESH:D015470     | Arsenic Tr   | 38.54 | 67  |
| IGFBP7   | 3490   | Leukemia, MESH:D015470     | Arsenic Tr   | 38.53 | 51  |
| CDKN2C   | 1031   | Leukemia, MESH:D015470     | Arsenic Tr   | 38.52 | 32  |
| HLA-DRA  | 3122   | Leukemia, MESH:D015470     | Arsenic Tr   | 38.52 | 40  |
| PER1     | 5187   | Leukemia, MESH:D015470     | Air Polluta  | 38.52 | 25  |
| AURKB    | 9212   | Leukemia, MESH:D015470     | Calcitriol C | 38.51 | 28  |
| EEF1A1   | 1915   | Leukemia, MESH:D015473     | Arsenic Tr   | 38.47 | 269 |
| S100A9   | 6280   | Leukemia, MESH:D015473     | Antimony     | 38.45 | 270 |

|        |        |                            |              |       |     |
|--------|--------|----------------------------|--------------|-------|-----|
| ANGPT1 | 284    | Leukemia, MESH:D015470     | Arsenic Tr   | 38.42 | 54  |
| CDCA8  | 55143  | Leukemia, MESH:D015470     | Calcitriol[C | 38.42 | 90  |
| NCL    | 4691   | Leukemia, MESH:D015470     | Amsacrine    | 38.42 | 35  |
| S100P  | 6286   | Leukemia, MESH:D015470     | Azacitidine  | 38.42 | 99  |
| TNNI3  | 7137   | Leukemia, MESH:D015470     | Azacitidine  | 38.42 | 55  |
| MLKL   | 197259 | Leukemia, MESH:D015470     | Decitabine   | 38.4  | 23  |
| TENT5C | 54855  | Leukemia, MESH:D015470     | Air Polluta  | 38.4  | 94  |
| CTSL   | 1514   | Leukemia, MESH:D015470     | Arsenic Tr   | 38.36 | 102 |
| ERRFI1 | 54206  | Leukemia, MESH:D015470     | Arsenic Tr   | 38.34 | 35  |
| CD24   | 1E+08  | Leukemia, MESH:D015470     | Arsenic Tr   | 38.31 | 31  |
| FHL1   | 2273   | Leukemia, MESH:D015470     | Air Polluta  | 38.31 | 50  |
| PPIA   | 5478   | Leukemia, MESH:D015470     | Air Polluta  | 38.31 | 35  |
| S100A8 | 6279   | Leukemia, MESH:D015473     | Antimony     | 38.28 | 270 |
| IRF6   | 3664   | Leukemia, MESH:D015470     | Arsenic Tr   | 38.27 | 34  |
| NBN    | 4683   | Leukemia, MESH:D015470     | Arsenic Tr   | 38.27 | 52  |
| STOM   | 2040   | Leukemia, MESH:D015470     | Benzene[C    | 38.27 | 105 |
| KIF20A | 10112  | Leukemia, MESH:D015470     | Benzene[C    | 38.26 | 49  |
| IFIT2  | 3433   | Leukemia, MESH:D015470     | Arsenic Tr   | 38.21 | 43  |
| PHLDA2 | 7262   | Leukemia, MESH:D015470     | Arsenic Tr   | 38.21 | 36  |
| HSPD1  | 3329   | Leukemia, MESH:D015470     | Arsenic Tr   | 38.15 | 36  |
| RAD23B | 5887   | Leukemia, MESH:D015470     | Arsenic Tr   | 38.14 | 32  |
| PDK4   | 5166   | Leukemia, MESH:D015470     | Air Polluta  | 38.12 | 38  |
| CDC25A | 993    | Leukemia, MESH:D015473     | Arsenic[Ar   | 38.11 | 275 |
| EFNA1  | 1942   | Leukemia, MESH:D015470     | Arsenic Tr   | 38.08 | 104 |
| HSPA2  | 3306   | Leukemia, MESH:D015470     | Arsenic Tr   | 38.08 | 47  |
| CASP4  | 837    | Leukemia, MESH:D015470     | Arsenic Tr   | 38.07 | 44  |
| ID2    | 3398   | Leukemia, MESH:D01marker/m | Arsenic Tr   | 38.06 | 54  |
| CLCF1  | 23529  | Leukemia, MESH:D015470     | Calcitriol[C | 38.01 | 29  |
| ATP2A2 | 488    | Leukemia, MESH:D015470     | Arsenic Tr   | 38    | 44  |
| CD83   | 9308   | Leukemia, MESH:D015470     | Air Polluta  | 38    | 21  |
| MYC    | 4609   | Leukemia, MESH:D015473     | alpha-Toc    | 38    | 274 |
| HGF    | 3082   | Leukemia, MESH:D01marker/m | ABT-737/A    | 37.93 | 30  |
| KLF6   | 1316   | Leukemia, MESH:D015470     | 15-deoxy-    | 37.93 | 54  |
| KLF5   | 688    | Leukemia, MESH:D015473     | Antimony     | 37.91 | 271 |
| UCP1   | 7350   | Leukemia, MESH:D015470     | Alitretinoin | 37.91 | 40  |
| CYCS   | 54205  | Leukemia, MESH:D015473     | 4'-methox    | 37.9  | 272 |
| LY96   | 23643  | Leukemia, MESH:D015470     | Arsenic Tr   | 37.9  | 47  |
| BNC1   | 646    | Leukemia, MESH:D015470     | Cytarabine   | 37.86 | 91  |
| GSR    | 2936   | Leukemia, MESH:D015470     | Allopurinc   | 37.86 | 66  |
| RGS2   | 5997   | Leukemia, MESH:D01marker/m | Arsenic Tr   | 37.85 | 61  |
| EIF5A  | 1984   | Leukemia, MESH:D015473     | Arsenic[Ar   | 37.82 | 269 |
| POR    | 5447   | Leukemia, MESH:D015470     | Benzene[B    | 37.82 | 44  |
| SCD    | 6319   | Leukemia, MESH:D015470     | Alitretinoin | 37.81 | 37  |
| XPC    | 7508   | Leukemia, MESH:D015470     | Arsenic Tr   | 37.8  | 67  |
| CPEB2  | 132864 | Leukemia, MESH:D015470     | Calcitriol[C | 37.76 | 26  |
| CSK    | 1445   | Leukemia, MESH:D015470     | Calcitriol[C | 37.76 | 20  |
| RASSF2 | 9770   | Leukemia, MESH:D015470     | Benzene[C    | 37.72 | 102 |
| SVEP1  | 79987  | Leukemia, MESH:D015470     | Calcitriol[C | 37.72 | 93  |
| SESN2  | 83667  | Leukemia, MESH:D015470     | Arsenic Tr   | 37.71 | 50  |
| HSPA4L | 22824  | Leukemia, MESH:D015470     | Arsenic Tr   | 37.7  | 28  |
| MUC1   | 4582   | Leukemia, MESH:D015470     | Air Polluta  | 37.7  | 27  |
| CXCL8  | 3576   | Leukemia, MESH:D015473     | alpha-Toc    | 37.67 | 274 |
| BCL6   | 604    | Leukemia, MESH:D015470     | Arsenic Tr   | 37.66 | 47  |
| NFKB2  | 4791   | Leukemia, MESH:D015470     | Arsenic Tr   | 37.66 | 38  |
| MKI67  | 4288   | Leukemia, MESH:D015473     | 2-(2-chlor   | 37.65 | 270 |
| CLDN1  | 9076   | Leukemia, MESH:D015470     | Air Polluta  | 37.64 | 32  |
| DHRS9  | 10170  | Leukemia, MESH:D015470     | Alitretinoin | 37.64 | 49  |
| E2F3   | 1871   | Leukemia, MESH:D015470     | Arsenic Tr   | 37.64 | 35  |



|         |       |                        |              |       |     |
|---------|-------|------------------------|--------------|-------|-----|
| HES1    | 3280  | Leukemia, MESH:D015470 | Arsenic Tr   | 37.64 | 32  |
| LFNG    | 3955  | Leukemia, MESH:D015470 | Air Polluta  | 37.64 | 26  |
| HMGB2   | 3148  | Leukemia, MESH:D015473 | Arsenic Ar   | 37.63 | 267 |
| PFAS    | 5198  | Leukemia, MESH:D015473 | Arsenic Ar   | 37.61 | 267 |
| F2RL1   | 2150  | Leukemia, MESH:D015470 | Air Polluta  | 37.6  | 34  |
| MAP3K8  | 1326  | Leukemia, MESH:D015470 | Benzene E    | 37.6  | 45  |
| ERBB3   | 2065  | Leukemia, MESH:D015473 | Arsenic Ar   | 37.57 | 167 |
| PLAT    | 5327  | Leukemia, MESH:D015473 | Arsenic Tr   | 37.57 | 272 |
| EXOSC2  | 23404 | Leukemia, MESH:D015470 | Arsenic Tr   | 37.56 | 27  |
| JCHAIN  | 3512  | Leukemia, MESH:D015470 | Air Polluta  | 37.56 | 30  |
| PHF19   | 26147 | Leukemia, MESH:D015470 | Air Polluta  | 37.56 | 17  |
| RAF1    | 5894  | Leukemia, MESH:D015470 | 15-deoxy-    | 37.56 | 31  |
| IL3     | 3562  | Leukemia, MESH:D015470 | Benzene E    | 37.52 | 33  |
| PPARA   | 5465  | Leukemia, MESH:D015470 | 15-deoxy-    | 37.48 | 63  |
| CENPF   | 1063  | Leukemia, MESH:D015473 | Arsenic Ar   | 37.44 | 162 |
| DIO2    | 1734  | Leukemia, MESH:D015470 | Azacidine    | 37.43 | 29  |
| ALDOC   | 230   | Leukemia, MESH:D015470 | Arsenic Tr   | 37.41 | 45  |
| CCL5    | 6352  | Leukemia, MESH:D015470 | 15-deoxy-    | 37.41 | 47  |
| MFAP2   | 4237  | Leukemia, MESH:D015470 | Alitretinoin | 37.41 | 26  |
| ITGA2   | 3673  | Leukemia, MESH:D015470 | Arsenic Tr   | 37.4  | 29  |
| NME1    | 4830  | Leukemia, MESH:D015470 | Arsenic Tr   | 37.4  | 27  |
| SOCS1   | 8651  | Leukemia, MESH:D015470 | 15-deoxy-    | 37.4  | 43  |
| LYZ     | 4069  | Leukemia, MESH:D015470 | Air Polluta  | 37.39 | 93  |
| IRS1    | 3667  | Leukemia, MESH:D015470 | Allopurinol  | 37.38 | 30  |
| TGFB2   | 7042  | Leukemia, MESH:D015470 | Benzene C    | 37.38 | 51  |
| DHRS2   | 10202 | Leukemia, MESH:D015473 | Arsenic Tr   | 37.36 | 267 |
| EPCAM   | 4072  | Leukemia, MESH:D015470 | Arsenic Tr   | 37.33 | 35  |
| DHRS3   | 9249  | Leukemia, MESH:D015470 | Alitretinoin | 37.3  | 22  |
| PTHLH   | 5744  | Leukemia, MESH:D015470 | Alitretinoin | 37.3  | 33  |
| CXCL2   | 2920  | Leukemia, MESH:D015470 | Air Polluta  | 37.29 | 37  |
| CARHSP1 | 23589 | Leukemia, MESH:D015470 | Calcitriol E | 37.27 | 31  |
| MELK    | 9833  | Leukemia, MESH:D015470 | Calcitriol C | 37.27 | 24  |
| MDC1    | 9656  | Leukemia, MESH:D015470 | Air Polluta  | 37.25 | 22  |
| NCOA2   | 10499 | Leukemia, MESH:D015473 | Arsenic Tr   | 37.24 | 269 |
| CCNF    | 899   | Leukemia, MESH:D015470 | Arsenic Tr   | 37.21 | 45  |
| PML     | 5371  | Leukemia, MESH:D015470 | Arsenic Tr   | 37.21 | 38  |
| SLC1A5  | 6510  | Leukemia, MESH:D015470 | Benzoates    | 37.21 | 28  |
| MMP1    | 4312  | Leukemia, MESH:D015473 | 2-(2-chloro  | 37.2  | 267 |
| VLDLR   | 7436  | Leukemia, MESH:D015470 | Arsenic Tr   | 37.17 | 31  |
| TAGLN   | 6876  | Leukemia, MESH:D015470 | Arsenic Tr   | 37.15 | 105 |
| TPX2    | 22974 | Leukemia, MESH:D015470 | Calcitriol E | 37.11 | 23  |
| BORA    | 79866 | Leukemia, MESH:D015470 | Cytarabine   | 37.1  | 89  |
| CASP1   | 834   | Leukemia, MESH:D015473 | Aclarubicin  | 37.1  | 268 |
| EIF4G2  | 1982  | Leukemia, MESH:D015470 | Arsenic Tr   | 37.1  | 39  |
| CREM    | 1390  | Leukemia, MESH:D015470 | Arsenic Tr   | 37.09 | 54  |
| TIMP3   | 7078  | Leukemia, MESH:D015470 | Arsenic Tr   | 37.09 | 104 |
| IL2     | 3558  | Leukemia, MESH:D015473 | Arsenic Ar   | 37.08 | 269 |
| LBH     | 81606 | Leukemia, MESH:D015470 | Calcitriol C | 37.04 | 87  |
| METTL7A | 25840 | Leukemia, MESH:D015470 | Air Polluta  | 37.04 | 27  |
| PHF5A   | 84844 | Leukemia, MESH:D015470 | Arsenic Tr   | 37.04 | 21  |
| SLC7A11 | 23657 | Leukemia, MESH:D015470 | Arsenic Tr   | 37.03 | 58  |
| AXIN2   | 8313  | Leukemia, MESH:D015470 | Air Polluta  | 37.01 | 36  |
| BMP6    | 654   | Leukemia, MESH:D015470 | Air Polluta  | 37.01 | 38  |
| KPNA2   | 3838  | Leukemia, MESH:D015470 | Arsenic Tr   | 37.01 | 98  |
| SRI     | 6717  | Leukemia, MESH:D015473 | Arsenic Ar   | 37.01 | 270 |
| ISG15   | 9636  | Leukemia, MESH:D015473 | alvocidib /  | 36.99 | 267 |
| HMCN1   | 83872 | Leukemia, MESH:D015470 | Calcitriol E | 36.95 | 23  |
| PRRC2C  | 23215 | Leukemia, MESH:D015470 | Arsenic Tr   | 36.95 | 91  |

|          |          |                            |              |       |     |
|----------|----------|----------------------------|--------------|-------|-----|
| FST      | 10468    | Leukemia, MESH:D015470     | Arsenic Tr   | 36.93 | 37  |
| KLF9     | 687      | Leukemia, MESH:D015470     | Arsenic Tr   | 36.93 | 35  |
| MTUS1    | 57509    | Leukemia, MESH:D015470     | Arsenic Tr   | 36.92 | 95  |
| RBL1     | 5933     | Leukemia, MESH:D015470     | alvocidib    | 36.92 | 37  |
| ACOX1    | 51       | Leukemia, MESH:D015470     | Air Polluta  | 36.91 | 33  |
| CHUK     | 1147     | Leukemia, MESH:D015470     | 15-deoxy-    | 36.88 | 37  |
| NRG1     | 3084     | Leukemia, MESH:D015470     | Arsenic Tr   | 36.88 | 40  |
| ARMC9    | 80210    | Leukemia, MESH:D015470     | Arsenic Tr   | 36.84 | 23  |
| TRIM38   | 10475    | Leukemia, MESH:D015470     | Calcitriol C | 36.84 | 27  |
| ZC2HC1A  | 51101    | Leukemia, MESH:D015470     | Doxorubic    | 36.84 | 22  |
| MX1      | 4599     | Leukemia, MESH:D01marker/m | alvocidib    | 36.82 | 50  |
| S100A8   | 6279     | Leukemia, MESH:D01marker/m | Alitretinoi  | 36.82 | 40  |
| BMP2     | 650      | Leukemia, MESH:D015470     | Arsenic Tr   | 36.82 | 41  |
| CDC42    | 998      | Leukemia, MESH:D015470     | Arsenic Tr   | 36.82 | 38  |
| PRKCB    | 5579     | Leukemia, MESH:D015470     | Arsenic Tr   | 36.82 | 39  |
| EGFR     | 1956     | Leukemia, MESH:D015473     | 2-(2-chlor   | 36.81 | 269 |
| FASL     | 14103    | Leukemia, MESH:D015470     | Arsenic Tr   | 36.8  | 34  |
| ITGA1    | 3672     | Leukemia, MESH:D015470     | Decitabine   | 36.8  | 32  |
| LMCD1    | 29995    | Leukemia, MESH:D015470     | Calcitriol C | 36.8  | 87  |
| UBE2C    | 11065    | Leukemia, MESH:D015473     | Antimony     | 36.8  | 268 |
| GPT      | 2875     | Leukemia, MESH:D015470     | Arsenic Tr   | 36.75 | 55  |
| ABCC2    | 1244     | Leukemia, MESH:D015473     | Antimony     | 36.74 | 273 |
| OCLN     | 1.01E+08 | Leukemia, MESH:D015473     | Arsenic Ar   | 36.73 | 271 |
| LGALS1   | 3956     | Leukemia, MESH:D015470     | Arsenic Tr   | 36.7  | 48  |
| ALAS2    | 212      | Leukemia, MESH:D015470     | Arsenic Tr   | 36.69 | 46  |
| H2BC21   | 8349     | Leukemia, MESH:D015470     | Benzene C    | 36.66 | 38  |
| PRSS12   | 8492     | Leukemia, MESH:D015470     | Azacididin   | 36.66 | 21  |
| SH3BGRL  | 6451     | Leukemia, MESH:D015470     | Arsenic Tr   | 36.66 | 25  |
| ZC3HAV1  | 56829    | Leukemia, MESH:D015470     | Benzene C    | 36.66 | 99  |
| MOK      | 5891     | Leukemia, MESH:D015470     | Calcitriol C | 36.65 | 18  |
| BCL2A1   | 597      | Leukemia, MESH:D015470     | Arsenic Tr   | 36.64 | 48  |
| EIF4EBP1 | 1978     | Leukemia, MESH:D01marker/m | 2-(2-chlor   | 36.62 | 58  |
| ABL1     | 25       | Leukemia, MESH:D015473     | alvocidib    | 36.62 | 268 |
| FABP5    | 2171     | Leukemia, MESH:D015470     | Alitretinoi  | 36.62 | 33  |
| MAP3K5   | 4217     | Leukemia, MESH:D015470     | Benzene C    | 36.62 | 69  |
| IL6      | 3569     | Leukemia, MESH:D015473     | 2-(2-chlor   | 36.6  | 282 |
| RPS6     | 6194     | Leukemia, MESH:D015473     | alpha-Toc    | 36.59 | 159 |
| RUNX1    | 861      | Leukemia, MESH:D01marker/m | Air Polluta  | 36.55 | 49  |
| MT1X     | 4501     | Leukemia, MESH:D015470     | Arsenic Tr   | 36.55 | 112 |
| NCF2     | 4688     | Leukemia, MESH:D015470     | Air Polluta  | 36.55 | 65  |
| HDAC1    | 3065     | Leukemia, MESH:D015470     | 15-deoxy-    | 36.54 | 38  |
| PGK1     | 5230     | Leukemia, MESH:D015470     | Alitretinoi  | 36.54 | 42  |
| SLC40A1  | 30061    | Leukemia, MESH:D015470     | Arsenic Tr   | 36.54 | 94  |
| ARL4C    | 10123    | Leukemia, MESH:D015470     | Arsenic Tr   | 36.52 | 24  |
| SQSTM1   | 8878     | Leukemia, MESH:D015473     | 2-(2-chlor   | 36.52 | 270 |
| XAF1     | 54739    | Leukemia, MESH:D015470     | Arsenic Tr   | 36.52 | 38  |
| HIPK1    | 204851   | Leukemia, MESH:D015473     | Arsenic ar   | 36.48 | 271 |
| ARHGDIA  | 396      | Leukemia, MESH:D015470     | Bortezomi    | 36.46 | 25  |
| CYB5R2   | 51700    | Leukemia, MESH:D015470     | Arsenic Tr   | 36.46 | 94  |
| DLG1     | 1739     | Leukemia, MESH:D015470     | Arsenic Tr   | 36.46 | 27  |
| RAN      | 5901     | Leukemia, MESH:D015470     | Decitabine   | 36.45 | 31  |
| FAM234B  | 57613    | Leukemia, MESH:D015470     | Air Polluta  | 36.39 | 17  |
| SRI      | 6717     | Leukemia, MESH:D015470     | Arsenic Tr   | 36.38 | 36  |
| TMEM158  | 25907    | Leukemia, MESH:D015470     | Arsenic Tr   | 36.38 | 25  |
| AKAP12   | 9590     | Leukemia, MESH:D015470     | Arsenic Tr   | 36.36 | 44  |
| ELF3     | 1999     | Leukemia, MESH:D015470     | Arsenic Tr   | 36.35 | 35  |
| MAP2     | 4133     | Leukemia, MESH:D015470     | Alitretinoi  | 36.31 | 96  |
| N4BP1    | 9683     | Leukemia, MESH:D015470     | Arsenic Tr   | 36.28 | 25  |

|         |        |                            |              |       |     |
|---------|--------|----------------------------|--------------|-------|-----|
| ACP5    | 54     | Leukemia, MESH:D015470     | Calcitriol C | 36.27 | 28  |
| LEP     | 3952   | Leukemia, MESH:D015470     | 15-deoxy-    | 36.27 | 42  |
| DHFR    | 1719   | Leukemia, MESH:D015473     | Antineopla   | 36.25 | 163 |
| GPM6B   | 2824   | Leukemia, MESH:D015470     | Arsenic Tr   | 36.24 | 38  |
| GSPT1   | 2935   | Leukemia, MESH:D015470     | Arsenic Tr   | 36.24 | 29  |
| PDGFRA  | 5156   | Leukemia, MESH:D015470     | 6,7-dimet    | 36.24 | 29  |
| UPP1    | 7378   | Leukemia, MESH:D015470     | Arsenic Tr   | 36.18 | 29  |
| ZNF692  | 55657  | Leukemia, MESH:D015470     | Dexameth     | 36.18 | 18  |
| RFC4    | 5984   | Leukemia, MESH:D015470     | Calcitriol C | 36.13 | 27  |
| WIPF1   | 7456   | Leukemia, MESH:D015470     | Arsenic Tr   | 36.1  | 87  |
| ASPM    | 259266 | Leukemia, MESH:D015470     | Arsenic Tr   | 36.09 | 32  |
| MICB    | 4277   | Leukemia, MESH:D015470     | Arsenic Tr   | 36.09 | 32  |
| NOS2    | 4843   | Leukemia, MESH:D015473     | alpha-Toc    | 36.06 | 273 |
| PER2    | 8864   | Leukemia, MESH:D015470     | Arsenic Tr   | 36.02 | 31  |
| CST3    | 1471   | Leukemia, MESH:D01marker/m | Arsenic Tr   | 36    | 50  |
| PML     | 5371   | Leukemia, MESH:D01marker/m | Antimony     | 36    | 275 |
| CLGN    | 1047   | Leukemia, MESH:D015473     | Antimony     | 36    | 262 |
| SLC7A8  | 23428  | Leukemia, MESH:D015473     | Arsenic Ar   | 36    | 266 |
| TFAP2A  | 7020   | Leukemia, MESH:D015473     | arsenite C   | 36    | 162 |
| HSPA1A  | 3303   | Leukemia, MESH:D015470     | Air Polluta  | 35.98 | 46  |
| ACSL1   | 2180   | Leukemia, MESH:D015470     | Arsenic Tr   | 35.97 | 43  |
| HTRA2   | 27429  | Leukemia, MESH:D015470     | alvocidib    | 35.96 | 27  |
| LTBR    | 4055   | Leukemia, MESH:D015470     | Arsenic Tr   | 35.96 | 45  |
| MT2A    | 4502   | Leukemia, MESH:D015470     | Arsenic Tr   | 35.95 | 107 |
| NQO1    | 1728   | Leukemia, MESH:D015473     | 2-(2-chlor   | 35.95 | 274 |
| NDC80   | 10403  | Leukemia, MESH:D015473     | Arsenic Ar   | 35.92 | 268 |
| BUB3    | 9184   | Leukemia, MESH:D015470     | Cyclophos    | 35.91 | 23  |
| FOXP3   | 50943  | Leukemia, MESH:D015470     | Arsenic Tr   | 35.91 | 44  |
| NOX4    | 50507  | Leukemia, MESH:D015470     | Arsenic Tr   | 35.91 | 107 |
| ZFP36L1 | 677    | Leukemia, MESH:D015470     | Arsenic Tr   | 35.91 | 42  |
| KRT19   | 3880   | Leukemia, MESH:D015473     | Arsenic Tr   | 35.9  | 270 |
| RXRA    | 6256   | Leukemia, MESH:D015473     | alpha-Toc    | 35.89 | 269 |
| ZFP36   | 7538   | Leukemia, MESH:D015470     | Arsenic Tr   | 35.87 | 44  |
| HBB     | 3043   | Leukemia, MESH:D015470     | Arsenic Tr   | 35.83 | 53  |
| NES     | 10763  | Leukemia, MESH:D015470     | 15-deoxy-    | 35.83 | 99  |
| RUNX3   | 864    | Leukemia, MESH:D01marker/m | Azacitidin   | 35.82 | 47  |
| HDAC9   | 9734   | Leukemia, MESH:D015470     | Decitabine   | 35.82 | 29  |
| KIF4A   | 24137  | Leukemia, MESH:D015470     | Calcitriol C | 35.82 | 22  |
| RAD54L  | 8438   | Leukemia, MESH:D015470     | Calcitriol C | 35.82 | 33  |
| WDHD1   | 11169  | Leukemia, MESH:D015470     | Calcitriol C | 35.82 | 19  |
| PMEPA1  | 56937  | Leukemia, MESH:D015470     | Benzene C    | 35.81 | 42  |
| CHEK2   | 11200  | Leukemia, MESH:D015470     | Arsenic Tr   | 35.79 | 45  |
| TXN     | 7295   | Leukemia, MESH:D015470     | Arsenic Tr   | 35.79 | 44  |
| ADA     | 100    | Leukemia, MESH:D015470     | Benzene C    | 35.74 | 43  |
| PLEKHG3 | 26030  | Leukemia, MESH:D015470     | Arsenic Tr   | 35.74 | 92  |
| UNG     | 7374   | Leukemia, MESH:D015470     | Calcitriol C | 35.74 | 43  |
| ANXA1   | 301    | Leukemia, MESH:D015470     | Alitretinoin | 35.72 | 39  |
| APEX1   | 328    | Leukemia, MESH:D015470     | Benzene B    | 35.72 | 69  |
| EP300   | 2033   | Leukemia, MESH:D015470     | Arsenic Tr   | 35.72 | 43  |
| TXNIP   | 10628  | Leukemia, MESH:D015473     | Arsenic ar   | 35.71 | 267 |
| PTEN    | 5728   | Leukemia, MESH:D015473     | Arsenic Ar   | 35.7  | 272 |
| SORT1   | 6272   | Leukemia, MESH:D015470     | Chloroqui    | 35.7  | 31  |
| BMI1    | 648    | Leukemia, MESH:D015470     | Arsenic Tr   | 35.69 | 30  |
| TAP1    | 6890   | Leukemia, MESH:D015473     | Arsenic Ar   | 35.69 | 276 |
| CAPN2   | 824    | Leukemia, MESH:D01marker/m | Alitretinoin | 35.66 | 29  |
| ERBB2   | 2064   | Leukemia, MESH:D015473     | Antineopla   | 35.66 | 162 |
| RELB    | 5971   | Leukemia, MESH:D015470     | Air Polluta  | 35.66 | 46  |
| SMAD7   | 4092   | Leukemia, MESH:D015470     | Air Polluta  | 35.66 | 31  |

|           |        |                            |              |       |     |
|-----------|--------|----------------------------|--------------|-------|-----|
| BMP4      | 652    | Leukemia, MESH:D015470     | Busulfan C   | 35.65 | 99  |
| SMCO4     | 56935  | Leukemia, MESH:D015470     | Air Polluta  | 35.64 | 24  |
| IFITM3    | 10410  | Leukemia, MESH:D015470     | Arsenic Tr   | 35.6  | 31  |
| IFNGR1    | 3459   | Leukemia, MESH:D015470     | Alitretinoi  | 35.6  | 36  |
| IL17A     | 3605   | Leukemia, MESH:D015470     | Arsenic Tr   | 35.6  | 53  |
| NCF1      | 653361 | Leukemia, MESH:D015470     | Arsenic Tr   | 35.6  | 56  |
| CASP6     | 839    | Leukemia, MESH:D015470     | Arsenic Tr   | 35.58 | 49  |
| EIF4E     | 1977   | Leukemia, MESH:D015470     | Arsenic Tr   | 35.57 | 28  |
| IL6R      | 3570   | Leukemia, MESH:D015470     | Air Polluta  | 35.57 | 69  |
| KIF23     | 9493   | Leukemia, MESH:D015470     | Calcitriol C | 35.57 | 34  |
| IFI35     | 3430   | Leukemia, MESH:D015470     | Air Polluta  | 35.56 | 21  |
| LOXL4     | 84171  | Leukemia, MESH:D015470     | Calcitriol C | 35.56 | 91  |
| LRATD2    | 157638 | Leukemia, MESH:D015470     | Calcitriol C | 35.56 | 19  |
| PTPRE     | 5791   | Leukemia, MESH:D015470     | Arsenic Tr   | 35.56 | 44  |
| TCP11L2   | 255394 | Leukemia, MESH:D015470     | Dasatinib    | 35.56 | 23  |
| YPEL5     | 51646  | Leukemia, MESH:D015470     | Arsenic Tr   | 35.56 | 31  |
| ATM       | 472    | Leukemia, MESH:D015473     | Arsenic Ar   | 35.49 | 273 |
| ETHE1     | 23474  | Leukemia, MESH:D015470     | Arsenic Tr   | 35.43 | 28  |
| KIAA0319I | 79932  | Leukemia, MESH:D015470     | Arsenic Tr   | 35.43 | 20  |
| H4-16     | 121504 | Leukemia, MESH:D015470     | Alitretinoi  | 35.41 | 27  |
| SPOCD1    | 90853  | Leukemia, MESH:D015470     | Benzene C    | 35.41 | 35  |
| TGFB1     | 7040   | Leukemia, MESH:D015473     | alpha-Toc    | 35.4  | 277 |
| ZEB1      | 6935   | Leukemia, MESH:D015473     | Arsenic Ar   | 35.4  | 266 |
| CPE       | 1363   | Leukemia, MESH:D015470     | Arsenic Tr   | 35.39 | 30  |
| MDFIC     | 29969  | Leukemia, MESH:D015470     | Calcitriol C | 35.39 | 27  |
| NFIX      | 4784   | Leukemia, MESH:D015470     | Decitabine   | 35.39 | 31  |
| SP4       | 6671   | Leukemia, MESH:D015470     | Air Polluta  | 35.39 | 27  |
| GLUL      | 2752   | Leukemia, MESH:D015470     | Alitretinoi  | 35.36 | 52  |
| ANXA4     | 307    | Leukemia, MESH:D01marker/m | Air Polluta  | 35.32 | 60  |
| IL11      | 3589   | Leukemia, MESH:D015470     | Arsenic Tr   | 35.32 | 51  |
| PFKP      | 5214   | Leukemia, MESH:D015470     | Arsenic Tr   | 35.32 | 91  |
| AREG      | 374    | Leukemia, MESH:D015470     | Calcitriol C | 35.3  | 40  |
| CSTA      | 1475   | Leukemia, MESH:D015470     | Arsenic Tr   | 35.3  | 29  |
| TNFRSF12  | 51330  | Leukemia, MESH:D015470     | Arsenic Tr   | 35.3  | 37  |
| UCK2      | 7371   | Leukemia, MESH:D015470     | Benzoates    | 35.3  | 21  |
| CDC45     | 8318   | Leukemia, MESH:D015470     | Arsenic Tr   | 35.29 | 36  |
| COL4A2    | 1284   | Leukemia, MESH:D015470     | Alitretinoi  | 35.29 | 21  |
| DFFA      | 1676   | Leukemia, MESH:D015473     | Aclarubici   | 35.29 | 271 |
| EDNRB     | 1910   | Leukemia, MESH:D015473     | Arsenic Ar   | 35.29 | 269 |
| SLC25A4   | 291    | Leukemia, MESH:D015470     | Arsenic Tr   | 35.29 | 52  |
| TGFA      | 7039   | Leukemia, MESH:D015473     | alpha-Toc    | 35.29 | 268 |
| TWIST1    | 7291   | Leukemia, MESH:D015470     | Calcitriol C | 35.29 | 22  |
| DNAJB9    | 4189   | Leukemia, MESH:D015470     | Arsenic Tr   | 35.23 | 45  |
| WDR76     | 79968  | Leukemia, MESH:D015470     | Arsenic Tr   | 35.23 | 29  |
| CLDN7     | 1366   | Leukemia, MESH:D015473     | Arsenic Ar   | 35.19 | 266 |
| HIPK2     | 28996  | Leukemia, MESH:D015470     | Calcitriol C | 35.19 | 30  |
| MAPKAPK   | 9261   | Leukemia, MESH:D015470     | Arsenic Tr   | 35.19 | 50  |
| MYD88     | 4615   | Leukemia, MESH:D015470     | Arsenic Tr   | 35.18 | 45  |
| BAG2      | 9532   | Leukemia, MESH:D015470     | Calcitriol C | 35.17 | 30  |
| KLF11     | 8462   | Leukemia, MESH:D015470     | Arsenic Tr   | 35.17 | 27  |
| NOL11     | 25926  | Leukemia, MESH:D015470     | Dexameth     | 35.17 | 18  |
| PRDM16    | 63976  | Leukemia, MESH:D015470     | Daunorub     | 35.17 | 58  |
| RNF19B    | 127544 | Leukemia, MESH:D015470     | Air Polluta  | 35.17 | 24  |
| SLC7A8    | 23428  | Leukemia, MESH:D015470     | Arsenic Tr   | 35.17 | 23  |
| EEF1A1    | 1915   | Leukemia, MESH:D015470     | Arsenic Tr   | 35.15 | 31  |
| PINK1     | 65018  | Leukemia, MESH:D015470     | Arsenic Tr   | 35.15 | 35  |
| CYP1A1    | 1543   | Leukemia, MESH:D015473     | alpha-Toc    | 35.14 | 275 |
| KRAS      | 3845   | Leukemia, MESH:D01marker/m | Benzene C    | 35.12 | 45  |

|          |        |                        |             |       |     |
|----------|--------|------------------------|-------------|-------|-----|
| ALDOA    | 226    | Leukemia, MESH:D015473 | Antimony    | 35.12 | 267 |
| TGFBR2   | 7048   | Leukemia, MESH:D015473 | Arsenic ars | 35.12 | 268 |
| TRIB1    | 10221  | Leukemia, MESH:D015473 | Arsenic ars | 35.12 | 165 |
| SLC2A3   | 6515   | Leukemia, MESH:D015470 | Arsenic Tr  | 35.09 | 31  |
| RERG     | 85004  | Leukemia, MESH:D015470 | Arsenic Tr  | 35.06 | 93  |
| IL4R     | 3566   | Leukemia, MESH:D015470 | Arsenic Tr  | 35.05 | 49  |
| CCN2     | 1490   | Leukemia, MESH:D015473 | Arsenic Ar  | 35.05 | 268 |
| DLK1     | 8788   | Leukemia, MESH:D015470 | Arsenic Tr  | 35.05 | 31  |
| MAP2K1   | 5604   | Leukemia, MESH:D015473 | 2-(2-chlor  | 35.05 | 265 |
| SET      | 6418   | Leukemia, MESH:D015470 | Arsenic Tr  | 35.05 | 44  |
| GADD45A  | 1647   | Leukemia, MESH:D015473 | alpha-Toc   | 35.04 | 273 |
| MAPK9    | 5601   | Leukemia, MESH:D015470 | 6,7-dimet   | 35.04 | 54  |
| TNFRSF21 | 27242  | Leukemia, MESH:D015470 | Arsenic Tr  | 34.99 | 29  |
| BIRC3    | 330    | Leukemia, MESH:D015473 | alvocidib   | 34.97 | 267 |
| OGG1     | 4968   | Leukemia, MESH:D015473 | Arsenic Ar  | 34.96 | 271 |
| PRDX2    | 7001   | Leukemia, MESH:D015470 | Arsenic Tr  | 34.95 | 46  |
| PTGS1    | 5742   | Leukemia, MESH:D015470 | 15-deoxy-   | 34.95 | 37  |
| IGF1R    | 3480   | Leukemia, MESH:D015473 | Antineopl   | 34.93 | 268 |
| DFFB     | 1677   | Leukemia, MESH:D015470 | Arsenic Tr  | 34.92 | 33  |
| LXN      | 56925  | Leukemia, MESH:D015470 | Calcitriol  | 34.92 | 38  |
| NUDT7    | 283927 | Leukemia, MESH:D015470 | Air Polluta | 34.92 | 30  |
| CYBA     | 1535   | Leukemia, MESH:D015473 | Arsenic Ar  | 34.91 | 277 |
| PBK      | 55872  | Leukemia, MESH:D015470 | Calcitriol  | 34.91 | 33  |
| RAD51    | 5888   | Leukemia, MESH:D015473 | Arsenic ars | 34.91 | 165 |
| RFFL     | 117584 | Leukemia, MESH:D015470 | Bortezomi   | 34.9  | 22  |
| ITPR3    | 3710   | Leukemia, MESH:D015470 | Arsenic Tr  | 34.89 | 34  |
| RAC2     | 5880   | Leukemia, MESH:D015470 | Arsenic Tr  | 34.89 | 48  |
| NTRK2    | 4915   | Leukemia, MESH:D015470 | Arsenic Tr  | 34.88 | 33  |
| TLR2     | 7097   | Leukemia, MESH:D015470 | 15-deoxy-   | 34.88 | 47  |
| ABCC5    | 10057  | Leukemia, MESH:D015470 | Arsenic Tr  | 34.82 | 40  |
| CCNG1    | 900    | Leukemia, MESH:D015473 | Arsenic Ar  | 34.81 | 273 |
| NET1     | 10276  | Leukemia, MESH:D015470 | Calcitriol  | 34.8  | 20  |
| SERPINB5 | 5268   | Leukemia, MESH:D015470 | Arsenic Tr  | 34.8  | 31  |
| MYL7     | 58498  | Leukemia, MESH:D015470 | Calcitriol  | 34.74 | 93  |
| SLC2A2   | 6514   | Leukemia, MESH:D015470 | Alitretinoi | 34.74 | 28  |
| STK4     | 6789   | Leukemia, MESH:D015470 | Bortezomi   | 34.74 | 22  |
| AIP      | 9049   | Leukemia, MESH:D015470 | Alitretinoi | 34.73 | 19  |
| MXRA5    | 25878  | Leukemia, MESH:D015470 | Calcitriol  | 34.73 | 20  |
| SASH3    | 54440  | Leukemia, MESH:D015470 | Air Polluta | 34.73 | 22  |
| ALB      | 213    | Leukemia, MESH:D015470 | Allopurinc  | 34.71 | 66  |
| ME1      | 4199   | Leukemia, MESH:D015470 | Arsenic Tr  | 34.71 | 43  |
| BRCA2    | 675    | Leukemia, MESH:D015473 | Arsenic Tr  | 34.7  | 271 |
| KIF23    | 9493   | Leukemia, MESH:D015473 | Arsenic ars | 34.7  | 160 |
| CENPU    | 79682  | Leukemia, MESH:D015470 | Calcitriol  | 34.68 | 26  |
| COL1A2   | 1278   | Leukemia, MESH:D015473 | Arsenic Ar  | 34.68 | 271 |
| DACT1    | 51339  | Leukemia, MESH:D015470 | Arsenic Tr  | 34.68 | 31  |
| SPRY1    | 10252  | Leukemia, MESH:D015470 | Dexameth    | 34.68 | 24  |
| ACHE     | 43     | Leukemia, MESH:D015473 | alpha-Toc   | 34.64 | 273 |
| AHR      | 196    | Leukemia, MESH:D015470 | 2-(2-chlor  | 34.64 | 55  |
| CALR     | 811    | Leukemia, MESH:D015473 | Antimony    | 34.6  | 266 |
| EXO1     | 9156   | Leukemia, MESH:D015470 | Calcitriol  | 34.59 | 42  |
| MAP2K3   | 5606   | Leukemia, MESH:D015470 | Arsenic Tr  | 34.59 | 60  |
| SHC1     | 6464   | Leukemia, MESH:D015470 | Arsenic Tr  | 34.59 | 46  |
| DNAJA1   | 3301   | Leukemia, MESH:D015470 | Alitretinoi | 34.58 | 30  |
| HPGD     | 3248   | Leukemia, MESH:D015470 | Arsenic Tr  | 34.58 | 27  |
| LIMS1    | 3987   | Leukemia, MESH:D015470 | Azacitidine | 34.58 | 25  |
| NR3C1    | 2908   | Leukemia, MESH:D015473 | Aclarubicin | 34.58 | 271 |
| CDC25B   | 994    | Leukemia, MESH:D015473 | Arsenic Ar  | 34.57 | 267 |

|           |        |                        |              |       |     |
|-----------|--------|------------------------|--------------|-------|-----|
| SERPINB2  | 5055   | Leukemia, MESH:D015473 | Arsenic Tr   | 34.57 | 267 |
| NID2      | 22795  | Leukemia, MESH:D015470 | Calcitriol C | 34.56 | 35  |
| ANXA2     | 302    | Leukemia, MESH:D015473 | Arsenic Ar   | 34.55 | 276 |
| TMSB4X    | 7114   | Leukemia, MESH:D015470 | Decitabine   | 34.55 | 36  |
| MMP3      | 4314   | Leukemia, MESH:D015470 | Benzene C    | 34.54 | 43  |
| CYP1A2    | 1544   | Leukemia, MESH:D015470 | Anthracyc    | 34.53 | 89  |
| IHH       | 3549   | Leukemia, MESH:D015473 | Arsenic Ar   | 34.53 | 266 |
| CAPRIN2   | 65981  | Leukemia, MESH:D015470 | Air Polluta  | 34.51 | 13  |
| CTSK      | 1513   | Leukemia, MESH:D015470 | Calcitriol C | 34.51 | 25  |
| FOXRED2   | 80020  | Leukemia, MESH:D015470 | Arsenic Tr   | 34.51 | 25  |
| KLF5      | 688    | Leukemia, MESH:D015470 | Arsenic Tr   | 34.51 | 41  |
| SLC22A5   | 6584   | Leukemia, MESH:D015470 | Allopurinc   | 34.51 | 32  |
| PPL       | 5493   | Leukemia, MESH:D015470 | Calcitriol C | 34.5  | 22  |
| GADD45G   | 10912  | Leukemia, MESH:D015470 | Bortezomi    | 34.48 | 43  |
| CREBRF    | 153222 | Leukemia, MESH:D015470 | Decitabine   | 34.44 | 30  |
| DKK3      | 27122  | Leukemia, MESH:D015470 | Arsenic Tr   | 34.44 | 38  |
| HMBS      | 3145   | Leukemia, MESH:D015470 | Aclarubicin  | 34.44 | 26  |
| ECH1      | 1891   | Leukemia, MESH:D015470 | Arsenic Tr   | 34.43 | 31  |
| HIC1      | 3090   | Leukemia, MESH:D015470 | Decitabine   | 34.42 | 36  |
| PAMR1     | 25891  | Leukemia, MESH:D015470 | Calcitriol C | 34.42 | 92  |
| SH3D19    | 152503 | Leukemia, MESH:D015470 | Arsenic Tr   | 34.42 | 26  |
| DMD       | 1756   | Leukemia, MESH:D015470 | Daunorub     | 34.4  | 59  |
| OLR1      | 4973   | Leukemia, MESH:D015470 | Alitretinoi  | 34.4  | 99  |
| SERPINF1  | 5176   | Leukemia, MESH:D015470 | Calcitriol C | 34.4  | 22  |
| ODC1      | 4953   | Leukemia, MESH:D015470 | Alitretinoi  | 34.39 | 32  |
| TIMP2     | 7077   | Leukemia, MESH:D015470 | Arsenic Tr   | 34.37 | 45  |
| ABCG1     | 9619   | Leukemia, MESH:D015470 | Alitretinoi  | 34.35 | 27  |
| CDC6      | 990    | Leukemia, MESH:D015470 | Arsenic Tr   | 34.35 | 39  |
| MTUS1     | 57509  | Leukemia, MESH:D015473 | Arsenic Ar   | 34.35 | 268 |
| TGFBI     | 7045   | Leukemia, MESH:D015470 | Decitabine   | 34.35 | 32  |
| DDIT3     | 1649   | Leukemia, MESH:D015473 | 2-(2-chlor   | 34.32 | 270 |
| ETV4      | 2118   | Leukemia, MESH:D015470 | Androgen     | 34.32 | 27  |
| FRZB      | 2487   | Leukemia, MESH:D015470 | Androgen     | 34.32 | 92  |
| FUBP1     | 8880   | Leukemia, MESH:D015470 | Arsenic Tr   | 34.32 | 28  |
| IL10RA    | 3587   | Leukemia, MESH:D015470 | Alitretinoi  | 34.32 | 33  |
| CDCA3     | 83461  | Leukemia, MESH:D015470 | Calcitriol C | 34.31 | 32  |
| ROCK1     | 6093   | Leukemia, MESH:D015470 | Arsenic Tr   | 34.31 | 61  |
| CCNE2     | 9134   | Leukemia, MESH:D015470 | Calcitriol C | 34.28 | 89  |
| GINS2     | 51659  | Leukemia, MESH:D015473 | Arsenic Ar   | 34.27 | 161 |
| HP        | 3240   | Leukemia, MESH:D015470 | Benzene C    | 34.27 | 37  |
| CCNA2     | 890    | Leukemia, MESH:D015473 | alvocidib    | 34.25 | 268 |
| CYBA      | 1535   | Leukemia, MESH:D015470 | Arsenic Tr   | 34.22 | 106 |
| GEM       | 2669   | Leukemia, MESH:D015470 | Calcitriol C | 34.22 | 22  |
| GPX4      | 2879   | Leukemia, MESH:D015470 | Arsenic Tr   | 34.22 | 29  |
| CDH3      | 1001   | Leukemia, MESH:D015470 | Calcitriol C | 34.2  | 92  |
| DLC1      | 10395  | Leukemia, MESH:D015470 | Arsenic Tr   | 34.2  | 33  |
| MTR       | 4548   | Leukemia, MESH:D015470 | Arsenic Tr   | 34.2  | 28  |
| RFC3      | 5983   | Leukemia, MESH:D015473 | arsenite Ci  | 34.18 | 158 |
| ID3       | 3399   | Leukemia, MESH:D015470 | Azacitidine  | 34.15 | 37  |
| ATP7A     | 538    | Leukemia, MESH:D015470 | Carboplati   | 34.12 | 42  |
| H2BC12    | 85236  | Leukemia, MESH:D015470 | Benzene C    | 34.12 | 36  |
| HELLS     | 3070   | Leukemia, MESH:D015470 | Calcitriol C | 34.12 | 21  |
| HOXA5     | 3202   | Leukemia, MESH:D015470 | Alitretinoi  | 34.12 | 93  |
| KDM4B     | 23030  | Leukemia, MESH:D015470 | Bortezomi    | 34.12 | 21  |
| NCOA1     | 8648   | Leukemia, MESH:D015470 | Alitretinoi  | 34.12 | 22  |
| RAB11FIP1 | 80223  | Leukemia, MESH:D015470 | Air Polluta  | 34.12 | 27  |
| TMC6      | 11322  | Leukemia, MESH:D015470 | Calcitriol C | 34.12 | 29  |
| CEP41     | 95681  | Leukemia, MESH:D015470 | Air Polluta  | 34.1  | 19  |

|         |       |                            |              |       |     |
|---------|-------|----------------------------|--------------|-------|-----|
| ATAD2   | 29028 | Leukemia, MESH:D015473     | Arsenic Ar   | 34.09 | 267 |
| FLT1    | 2321  | Leukemia, MESH:D015470     | Arsenic Tr   | 34.09 | 33  |
| GSTP1   | 2950  | Leukemia, MESH:D015473     | Aclarubicin  | 34.09 | 269 |
| PDGFB   | 5155  | Leukemia, MESH:D015470     | Alitretinoin | 34.09 | 34  |
| SQLE    | 6713  | Leukemia, MESH:D015470     | Air Polluta  | 34.09 | 41  |
| BLM     | 641   | Leukemia, MESH:D015470     | Air Polluta  | 34.08 | 32  |
| COL8A1  | 1295  | Leukemia, MESH:D015470     | Calcitriol C | 34.08 | 22  |
| MAPK13  | 5603  | Leukemia, MESH:D015470     | Arsenic Tr   | 34.08 | 26  |
| TP73    | 7161  | Leukemia, MESH:D015470     | 2-(2-chloro  | 34.08 | 41  |
| HSPB8   | 26353 | Leukemia, MESH:D015470     | Arsenic Tr   | 34.04 | 36  |
| TP11    | 7167  | Leukemia, MESH:D015470     | Arsenic Tr   | 34.04 | 40  |
| BNIP3L  | 665   | Leukemia, MESH:D015470     | Arsenic Tr   | 34.03 | 36  |
| GPX3    | 2878  | Leukemia, MESH:D015473     | Arsenic Tr   | 34    | 265 |
| AHCYL1  | 10768 | Leukemia, MESH:D015470     | Air Polluta  | 33.97 | 35  |
| BTG3    | 10950 | Leukemia, MESH:D015470     | Air Polluta  | 33.97 | 33  |
| ENPP2   | 5168  | Leukemia, MESH:D015470     | Arsenic Tr   | 33.97 | 42  |
| MAP2K6  | 5608  | Leukemia, MESH:D015470     | Arsenic Tr   | 33.97 | 44  |
| RARRES1 | 5918  | Leukemia, MESH:D015470     | Alitretinoin | 33.97 | 24  |
| SLC43A3 | 29015 | Leukemia, MESH:D015470     | Bortezomi    | 33.97 | 93  |
| ST3GAL1 | 6482  | Leukemia, MESH:D015470     | Benzene C    | 33.97 | 104 |
| BRCA1   | 672   | Leukemia, MESH:D015473     | Arsenic Ar   | 33.95 | 271 |
| GBP2    | 2634  | Leukemia, MESH:D015470     | Azacitidine  | 33.94 | 27  |
| NRIP1   | 8204  | Leukemia, MESH:D015470     | Azacitidine  | 33.94 | 37  |
| TOP1    | 7150  | Leukemia, MESH:D015470     | Arsenic Tr   | 33.94 | 30  |
| BST2    | 684   | Leukemia, MESH:D015473     | Arsenic Tr   | 33.92 | 272 |
| DNMT3B  | 1789  | Leukemia, MESH:D015473     | Arsenic Ar   | 33.92 | 268 |
| FYN     | 2534  | Leukemia, MESH:D015473     | alpha-Toc    | 33.92 | 168 |
| GRB2    | 2885  | Leukemia, MESH:D015473     | Arsenic Tr   | 33.92 | 264 |
| MYH10   | 4628  | Leukemia, MESH:D015473     | Arsenic Ar   | 33.92 | 270 |
| NPHS1   | 4868  | Leukemia, MESH:D015473     | Calcitriol C | 33.92 | 161 |
| GPX2    | 2877  | Leukemia, MESH:D015473     | Antimony     | 33.9  | 161 |
| NR1I2   | 8856  | Leukemia, MESH:D015470     | Alitretinoin | 33.9  | 47  |
| PLAAT4  | 5920  | Leukemia, MESH:D015470     | Alitretinoin | 33.9  | 24  |
| WDR19   | 57728 | Leukemia, MESH:D015470     | Air Polluta  | 33.9  | 22  |
| HNF4A   | 3172  | Leukemia, MESH:D015470     | Alitretinoin | 33.89 | 35  |
| NR1D1   | 9572  | Leukemia, MESH:D015470     | Dexameth     | 33.89 | 27  |
| FKBP5   | 2289  | Leukemia, MESH:D015473     | Arsenic Ar   | 33.86 | 269 |
| H2AC6   | 8334  | Leukemia, MESH:D015470     | Arsenic Tr   | 33.86 | 28  |
| HSP90B1 | 7184  | Leukemia, MESH:D015473     | Arsenic Ar   | 33.86 | 270 |
| RRBP1   | 6238  | Leukemia, MESH:D015470     | Arsenic Tr   | 33.86 | 26  |
| NEK2    | 4751  | Leukemia, MESH:D015470     | Calcitriol C | 33.85 | 32  |
| PLTP    | 5360  | Leukemia, MESH:D015470     | Arsenic Tr   | 33.85 | 91  |
| ABCA1   | 19    | Leukemia, MESH:D01marker/m | Arsenic Ar   | 33.84 | 268 |
| ACTG2   | 72    | Leukemia, MESH:D015473     | Arsenic Tr   | 33.83 | 263 |
| S100A9  | 6280  | Leukemia, MESH:D015470     | Alitretinoin | 33.83 | 40  |
| ATF2    | 1386  | Leukemia, MESH:D015470     | Arsenic Tr   | 33.82 | 38  |
| MBD2    | 8932  | Leukemia, MESH:D015470     | Arsenic Tr   | 33.82 | 30  |
| RASGRP2 | 10235 | Leukemia, MESH:D015470     | Decitabine   | 33.82 | 29  |
| TFRC    | 7037  | Leukemia, MESH:D015470     | Arsenic Tr   | 33.77 | 42  |
| EIF2AK3 | 9451  | Leukemia, MESH:D015470     | Arsenic Tr   | 33.76 | 34  |
| MYH6    | 4624  | Leukemia, MESH:D015470     | Arsenic Tr   | 33.76 | 60  |
| TNFSF11 | 8600  | Leukemia, MESH:D015473     | Arsenic Ar   | 33.76 | 267 |
| DPP4    | 1803  | Leukemia, MESH:D015470     | Arsenic Tr   | 33.74 | 50  |
| FTL     | 2512  | Leukemia, MESH:D015473     | Antimony     | 33.74 | 269 |
| GAS1    | 2619  | Leukemia, MESH:D015470     | Arsenic Tr   | 33.74 | 22  |
| ORC6    | 23594 | Leukemia, MESH:D015470     | Calcitriol C | 33.74 | 21  |
| PABPC1L | 80336 | Leukemia, MESH:D015470     | Dexameth     | 33.7  | 15  |
| PLCXD1  | 55344 | Leukemia, MESH:D015470     | Arsenic Tr   | 33.7  | 26  |

|          |        |                              |              |       |     |
|----------|--------|------------------------------|--------------|-------|-----|
| WRN      | 7486   | Leukemia, MESH:D015470       | Amsacrine    | 33.7  | 45  |
| BCR      | 613    | Leukemia, MESH:D015470       | Arsenic Tr   | 33.68 | 20  |
| HLA-A    | 3105   | Leukemia, MESH:D015470       | Arsenic Tr   | 33.68 | 33  |
| POLD3    | 10714  | Leukemia, MESH:D015470       | Arsenic Tr   | 33.68 | 28  |
| ACSS2    | 55902  | Leukemia, MESH:D015470       | Arsenic Tr   | 33.67 | 29  |
| MAT2A    | 4144   | Leukemia, MESH:D015470       | Air Polluta  | 33.67 | 37  |
| PTGES    | 9536   | Leukemia, MESH:D015470       | Air Polluta  | 33.67 | 34  |
| CDCA7    | 83879  | Leukemia, MESH:D015470       | Calcitriol C | 33.63 | 20  |
| HCK      | 3055   | Leukemia, MESH:D015470       | Air Polluta  | 33.63 | 24  |
| ORC1     | 4998   | Leukemia, MESH:D015470       | Benzene C    | 33.63 | 32  |
| PALLD    | 23022  | Leukemia, MESH:D015470       | Bortezomi    | 33.63 | 28  |
| RARG     | 5916   | Leukemia, MESH:D015470       | Alitretinoi  | 33.63 | 32  |
| STARD4   | 134429 | Leukemia, MESH:D015470       | Arsenic Tr   | 33.63 | 32  |
| STAT4    | 6775   | Leukemia, MESH:D015470       | Arsenic Tr   | 33.63 | 43  |
| THBD     | 7056   | Leukemia, MESH:D01marker/m   | Arsenic Ar   | 33.61 | 273 |
| AOX1     | 316    | Leukemia, MESH:D015470       | Dasatinib    | 33.59 | 24  |
| CSF3     | 1440   | Leukemia, MESH:D01therapeuti | Air Polluta  | 33.58 | 45  |
| ACKR3    | 57007  | Leukemia, MESH:D015473       | Arsenic ar:  | 33.58 | 160 |
| HNRNPA1  | 3178   | Leukemia, MESH:D015470       | Arsenic Tr   | 33.58 | 28  |
| PLK4     | 10733  | Leukemia, MESH:D015473       | Arsenic Tr   | 33.58 | 266 |
| SLC9A3R1 | 9368   | Leukemia, MESH:D015470       | Air Polluta  | 33.58 | 112 |
| MET      | 4233   | Leukemia, MESH:D01marker/m   | ABT-737 /    | 33.54 | 37  |
| MN1      | 4330   | Leukemia, MESH:D01marker/m   | Calcitriol C | 33.54 | 26  |
| CDCA7L   | 55536  | Leukemia, MESH:D015470       | Calcitriol C | 33.54 | 19  |
| CHRD1    | 91851  | Leukemia, MESH:D015470       | Arsenic Tr   | 33.54 | 30  |
| LRRN3    | 54674  | Leukemia, MESH:D015470       | Air Polluta  | 33.54 | 87  |
| WNT10B   | 7480   | Leukemia, MESH:D015470       | 15-deoxy-    | 33.54 | 19  |
| C1R      | 715    | Leukemia, MESH:D015470       | Arsenic Tr   | 33.52 | 40  |
| SMPD1    | 6609   | Leukemia, MESH:D015470       | Arsenic Tr   | 33.52 | 53  |
| TNFRSF11 | 4982   | Leukemia, MESH:D015470       | Amsacrine    | 33.52 | 43  |
| STXBP4   | 252983 | Leukemia, MESH:D015470       | Dexameth     | 33.5  | 17  |
| TRIM8    | 81603  | Leukemia, MESH:D015470       | Azacitidin   | 33.5  | 24  |
| TSPAN31  | 6302   | Leukemia, MESH:D015470       | Arsenic Tr   | 33.5  | 26  |
| SIGMAR1  | 10280  | Leukemia, MESH:D015470       | Air Polluta  | 33.49 | 24  |
| AKR1B1   | 231    | Leukemia, MESH:D015470       | Arsenic Tr   | 33.46 | 54  |
| ZNF738   | 148203 | Leukemia, MESH:D015470       | Air Polluta  | 33.46 | 15  |
| CAT      | 847    | Leukemia, MESH:D015473       | alpha-Toc    | 33.45 | 275 |
| CCL2     | 6347   | Leukemia, MESH:D015473       | alpha-Toc    | 33.45 | 274 |
| RRM2     | 6241   | Leukemia, MESH:D015473       | Arsenic Tr   | 33.43 | 270 |
| NMU      | 10874  | Leukemia, MESH:D015473       | Arsenic ar:  | 33.42 | 164 |
| CRABP2   | 1382   | Leukemia, MESH:D015470       | Alitretinoi  | 33.41 | 30  |
| LY6E     | 4061   | Leukemia, MESH:D015470       | Arsenic Tr   | 33.41 | 36  |
| RIPK2    | 8767   | Leukemia, MESH:D015470       | Benzene C    | 33.41 | 47  |
| SMO      | 6608   | Leukemia, MESH:D015470       | Androgen     | 33.41 | 29  |
| TP53INP1 | 94241  | Leukemia, MESH:D015470       | Arsenic Tr   | 33.41 | 31  |
| CNBP     | 7555   | Leukemia, MESH:D015470       | Arsenic Tr   | 33.4  | 24  |
| PLD3     | 23646  | Leukemia, MESH:D015470       | Arsenic Tr   | 33.4  | 91  |
| ALPL     | 249    | Leukemia, MESH:D015470       | Allopurinc   | 33.39 | 47  |
| GFAP     | 2670   | Leukemia, MESH:D015473       | alpha-Toc    | 33.39 | 167 |
| MAFF     | 23764  | Leukemia, MESH:D015473       | Antimony     | 33.39 | 270 |
| AHNAK    | 79026  | Leukemia, MESH:D015470       | Calcitriol C | 33.32 | 94  |
| CIZ1     | 25792  | Leukemia, MESH:D015470       | Dexameth     | 33.31 | 20  |
| GSN      | 2934   | Leukemia, MESH:D015473       | arsenic dis  | 33.31 | 267 |
| LDLRAP1  | 26119  | Leukemia, MESH:D015470       | Calcitriol C | 33.31 | 20  |
| PDIA3    | 2923   | Leukemia, MESH:D015473       | Arsenic Ar   | 33.31 | 268 |
| CXCL5    | 6374   | Leukemia, MESH:D015470       | Arsenic Tr   | 33.3  | 49  |
| EPB41L3  | 23136  | Leukemia, MESH:D015470       | Calcitriol C | 33.3  | 33  |
| NCAPD2   | 9918   | Leukemia, MESH:D015470       | Air Polluta  | 33.3  | 19  |



|         |        |                                |              |       |     |
|---------|--------|--------------------------------|--------------|-------|-----|
| OLFML3  | 56944  | Leukemia, MESH:D015470         | Arsenic Tr   | 33.3  | 91  |
| PPM1D   | 8493   | Leukemia, MESH:D015470         | Arsenic Tr   | 33.3  | 35  |
| PSMB10  | 5699   | Leukemia, MESH:D015470         | Calcitriol C | 33.3  | 20  |
| CHD9    | 80205  | Leukemia, MESH:D015470         | Calcitriol C | 33.26 | 19  |
| IRF7    | 3665   | Leukemia, MESH:D015473         | Arsenic Ar   | 33.26 | 270 |
| LHX2    | 9355   | Leukemia, MESH:D015470         | Cyclophos    | 33.26 | 29  |
| MEIS1   | 4211   | Leukemia, MESH:D015470         | Alitretinoin | 33.26 | 99  |
| POLQ    | 10721  | Leukemia, MESH:D015470         | Calcitriol C | 33.26 | 29  |
| CXCL14  | 9547   | Leukemia, MESH:D015470         | Alitretinoin | 33.23 | 30  |
| MSH2    | 4436   | Leukemia, MESH:D015470         | Air Polluta  | 33.23 | 37  |
| PLK3    | 1263   | Leukemia, MESH:D015470         | Air Polluta  | 33.23 | 52  |
| PRKCE   | 5581   | Leukemia, MESH:D015470         | Arsenic Tr   | 33.23 | 37  |
| PRNP    | 5621   | Leukemia, MESH:D015470         | Arsenic Tr   | 33.23 | 110 |
| STC1    | 6781   | Leukemia, MESH:D015470         | Arsenic Tr   | 33.23 | 35  |
| HSPA9   | 3313   | Leukemia, MESH:D015470         | Air Polluta  | 33.21 | 35  |
| FLNC    | 2318   | Leukemia, MESH:D015470         | Calcitriol C | 33.2  | 88  |
| CCL5    | 6352   | Leukemia, MESH:D015473         | Arsenic ars  | 33.18 | 166 |
| SOD2    | 6648   | Leukemia, MESH:D015473         | alpha-Toc    | 33.18 | 274 |
| CTNNB1  | 1499   | Leukemia, MESH:D015473         | 2-(2-chlor   | 33.16 | 269 |
| RBM17   | 84991  | Leukemia, MESH:D015470         | Arsenic Tr   | 33.13 | 44  |
| CYP2C9  | 1559   | Leukemia, MESH:D015470         | Bortezomi    | 33.12 | 30  |
| FANCG   | 2189   | Leukemia, MESH:D015470         | Calcitriol C | 33.12 | 26  |
| GALM    | 130589 | Leukemia, MESH:D015470         | Arsenic Tr   | 33.12 | 23  |
| IL10RB  | 3588   | Leukemia, MESH:D015470         | Air Polluta  | 33.12 | 37  |
| NUP153  | 9972   | Leukemia, MESH:D015470         | Arsenic Tr   | 33.12 | 28  |
| PPIC    | 5480   | Leukemia, MESH:D015470         | Calcitriol C | 33.12 | 91  |
| CDCA5   | 113130 | Leukemia, MESH:D015470         | Calcitriol C | 33.09 | 21  |
| COL4A1  | 1282   | Leukemia, MESH:D015470         | Busulfan C   | 33.09 | 30  |
| FBLN5   | 10516  | Leukemia, MESH:D015470         | Arsenic Tr   | 33.09 | 31  |
| IRS2    | 8660   | Leukemia, MESH:D015470         | Benzene C    | 33.09 | 52  |
| MECP2   | 4204   | Leukemia, MESH:D015470         | Arsenic Tr   | 33.09 | 47  |
| SLC7A7  | 9056   | Leukemia, MESH:D015470         | Calcitriol C | 33.09 | 85  |
| MAPT    | 4137   | Leukemia, MESH:D015470         | Azacitidine  | 33.07 | 53  |
| MPO     | 4353   | Leukemia, MESH:D015473         | alpha-Toc    | 33.07 | 269 |
| PHLDA3  | 23612  | Leukemia, MESH:D015470         | Arsenic Tr   | 33.06 | 46  |
| SLC16A3 | 9123   | Leukemia, MESH:D015470         | Arsenic Tr   | 33.06 | 111 |
| ENO2    | 2026   | Leukemia, MESH:D015470marker/m | Azacitidine  | 33.02 | 33  |
| CTSD    | 1509   | Leukemia, MESH:D015470         | Arsenic Tr   | 33.02 | 31  |
| ELOVL6  | 79071  | Leukemia, MESH:D015470         | Benzene B    | 33.02 | 33  |
| NOTCH2  | 4853   | Leukemia, MESH:D015473         | Arsenic Ar   | 33.02 | 266 |
| P4HA1   | 5033   | Leukemia, MESH:D015473         | Arsenic Ar   | 33.02 | 269 |
| TP63    | 8626   | Leukemia, MESH:D015473         | Antimony     | 33.02 | 264 |
| ABLIM1  | 3983   | Leukemia, MESH:D015470         | Arsenic Tr   | 32.99 | 39  |
| CNN1    | 1264   | Leukemia, MESH:D015470         | Alitretinoin | 32.99 | 25  |
| LAMC1   | 3915   | Leukemia, MESH:D015470         | Arsenic Tr   | 32.99 | 36  |
| RYR2    | 6262   | Leukemia, MESH:D015470         | Arsenic Tr   | 32.99 | 62  |
| TNFAIP8 | 25816  | Leukemia, MESH:D015470         | Arsenic Tr   | 32.99 | 26  |
| CFL2    | 1073   | Leukemia, MESH:D015470         | Air Polluta  | 32.98 | 21  |
| CPT1A   | 1374   | Leukemia, MESH:D015470         | Arsenic Tr   | 32.98 | 35  |
| MT1A    | 4489   | Leukemia, MESH:D015470         | Arsenic Tr   | 32.98 | 128 |
| OASL    | 8638   | Leukemia, MESH:D015470         | Calcitriol C | 32.98 | 21  |
| RAD54B  | 25788  | Leukemia, MESH:D015470         | Arsenic Tr   | 32.98 | 32  |
| SCG2    | 7857   | Leukemia, MESH:D015470         | Arsenic Tr   | 32.98 | 30  |
| SLC2A1  | 6513   | Leukemia, MESH:D015470         | Arsenic Tr   | 32.98 | 98  |
| G0S2    | 50486  | Leukemia, MESH:D015473         | Arsenic Ar   | 32.97 | 267 |
| LEPR    | 3953   | Leukemia, MESH:D015470         | Allopurinol  | 32.97 | 94  |
| PRKCA   | 5578   | Leukemia, MESH:D015470         | Arsenic Tr   | 32.97 | 47  |
| ACADM   | 34     | Leukemia, MESH:D015470         | Air Polluta  | 32.95 | 34  |

|          |        |                            |              |       |     |
|----------|--------|----------------------------|--------------|-------|-----|
| ALAS1    | 211    | Leukemia, MESH:D015470     | Arsenic Tr   | 32.95 | 59  |
| CHP1     | 11261  | Leukemia, MESH:D015470     | Benzene C    | 32.95 | 40  |
| TNFSF9   | 8744   | Leukemia, MESH:D015473     | Arsenic Ar   | 32.94 | 268 |
| GUSB     | 2990   | Leukemia, MESH:D015470     | Benzene C    | 32.89 | 42  |
| LAMC2    | 3918   | Leukemia, MESH:D015470     | Arsenic Tr   | 32.89 | 25  |
| CD59     | 966    | Leukemia, MESH:D015470     | Benzene C    | 32.88 | 41  |
| NRP2     | 8828   | Leukemia, MESH:D015470     | Calcitriol C | 32.88 | 19  |
| HMGA2    | 8091   | Leukemia, MESH:D015473     | Arsenic Ar   | 32.87 | 265 |
| HSP90AA1 | 3320   | Leukemia, MESH:D015470     | Air Polluta  | 32.87 | 44  |
| ADM      | 133    | Leukemia, MESH:D015470     | Arsenic Tr   | 32.86 | 38  |
| PRNP     | 5621   | Leukemia, MESH:D015473     | Arsenic Tr   | 32.85 | 271 |
| PTTG1    | 9232   | Leukemia, MESH:D015473     | Antimony     | 32.85 | 264 |
| HMMR     | 3161   | Leukemia, MESH:D015470     | Calcitriol C | 32.81 | 23  |
| GCLM     | 2730   | Leukemia, MESH:D015470     | Air Polluta  | 32.8  | 55  |
| GLI1     | 2735   | Leukemia, MESH:D01marker/m | Arsenic Ar   | 32.79 | 268 |
| EIF4A1   | 1973   | Leukemia, MESH:D015470     | Arsenic Tr   | 32.78 | 30  |
| SLC27A1  | 376497 | Leukemia, MESH:D015470     | Alitretinoi  | 32.78 | 27  |
| RTN2     | 6253   | Leukemia, MESH:D015470     | Calcitriol C | 32.77 | 14  |
| EGR2     | 1959   | Leukemia, MESH:D015470     | Arsenic Tr   | 32.74 | 42  |
| C1S      | 716    | Leukemia, MESH:D015470     | Benzene C    | 32.72 | 43  |
| MPZL1    | 9019   | Leukemia, MESH:D015470     | Cytarabine   | 32.72 | 89  |
| NELL2    | 4753   | Leukemia, MESH:D015470     | Calcitriol C | 32.72 | 93  |
| RGS16    | 6004   | Leukemia, MESH:D015470     | Benzoates    | 32.72 | 24  |
| RORA     | 6095   | Leukemia, MESH:D015470     | Arsenic Tr   | 32.72 | 36  |
| RRM1     | 6240   | Leukemia, MESH:D015470     | Arsenic Tr   | 32.72 | 27  |
| S100P    | 6286   | Leukemia, MESH:D015473     | Arsenic Ar   | 32.72 | 163 |
| CKB      | 1152   | Leukemia, MESH:D015470     | Arsenic Tr   | 32.68 | 91  |
| CSF1     | 1435   | Leukemia, MESH:D015470     | Azacididine  | 32.68 | 37  |
| MMP13    | 4322   | Leukemia, MESH:D015470     | Androgen     | 32.68 | 50  |
| MYH10    | 4628   | Leukemia, MESH:D015470     | Arsenic Tr   | 32.68 | 26  |
| PKM      | 5315   | Leukemia, MESH:D015470     | Alitretinoi  | 32.68 | 35  |
| ZFP36L2  | 678    | Leukemia, MESH:D015470     | Dexameth     | 32.68 | 19  |
| S100A10  | 6281   | Leukemia, MESH:D01marker/m | Arsenic Tr   | 32.64 | 111 |
| FADS1    | 3992   | Leukemia, MESH:D015470     | Benzene B    | 32.64 | 41  |
| IFNG     | 3458   | Leukemia, MESH:D01marker/m | alpha-Toc    | 32.63 | 273 |
| ALAS1    | 211    | Leukemia, MESH:D015473     | alpha-Toc    | 32.63 | 269 |
| ZNF787   | 126208 | Leukemia, MESH:D015470     | Bortezomi    | 32.63 | 15  |
| SLC3A2   | 6520   | Leukemia, MESH:D015470     | Arsenic Tr   | 32.62 | 36  |
| ITPR1    | 3708   | Leukemia, MESH:D015470     | Arsenic Tr   | 32.61 | 35  |
| NOS3     | 4846   | Leukemia, MESH:D015473     | alpha-Toc    | 32.61 | 269 |
| OAT      | 4942   | Leukemia, MESH:D015470     | Benzene C    | 32.61 | 46  |
| BCL7A    | 605    | Leukemia, MESH:D015470     | Arsenic Tr   | 32.59 | 23  |
| IGF2BP3  | 10643  | Leukemia, MESH:D015470     | Cyclophos    | 32.59 | 28  |
| ISLR     | 3671   | Leukemia, MESH:D015470     | Dexameth     | 32.59 | 24  |
| LSAMP    | 4045   | Leukemia, MESH:D015470     | Arsenic Tr   | 32.59 | 51  |
| NOC2L    | 26155  | Leukemia, MESH:D015470     | Dexameth     | 32.59 | 20  |
| PMS1     | 5378   | Leukemia, MESH:D015470     | Cyclophos    | 32.59 | 23  |
| TAP2     | 6891   | Leukemia, MESH:D015470     | Air Polluta  | 32.59 | 46  |
| TROAP    | 10024  | Leukemia, MESH:D015470     | Calcitriol C | 32.59 | 19  |
| ACTG2    | 72     | Leukemia, MESH:D015470     | Alitretinoi  | 32.57 | 31  |
| FSTL1    | 11167  | Leukemia, MESH:D015470     | Decitabine   | 32.57 | 29  |
| HBP1     | 26959  | Leukemia, MESH:D015470     | Air Polluta  | 32.57 | 32  |
| MAP2K3   | 5606   | Leukemia, MESH:D015473     | Arsenic Tr   | 32.57 | 267 |
| SERPINE1 | 5054   | Leukemia, MESH:D015473     | Antimony     | 32.57 | 273 |
| TXNRD1   | 7296   | Leukemia, MESH:D015470     | Arsenic Tr   | 32.57 | 31  |
| PROM1    | 8842   | Leukemia, MESH:D015470     | Arsenic Tr   | 32.56 | 56  |
| BAK1     | 578    | Leukemia, MESH:D015473     | Arsenic Tr   | 32.54 | 268 |
| CD14     | 929    | Leukemia, MESH:D015473     | Arsenic Ar   | 32.54 | 268 |

|         |        |                            |              |       |     |
|---------|--------|----------------------------|--------------|-------|-----|
| CDX1    | 1044   | Leukemia, MESH:D015470     | Arsenic Tr   | 32.54 | 24  |
| GYG2    | 8908   | Leukemia, MESH:D015470     | Cytarabine   | 32.54 | 83  |
| IRS1    | 3667   | Leukemia, MESH:D015473     | Arsenic Ar   | 32.54 | 267 |
| TGFB2   | 7042   | Leukemia, MESH:D015473     | arsenite Ca  | 32.54 | 164 |
| INPP4B  | 8821   | Leukemia, MESH:D015473     | Arsenic Ca   | 32.53 | 165 |
| FOXO3   | 2309   | Leukemia, MESH:D015470     | Arsenic Tr   | 32.51 | 37  |
| ITGA3   | 3675   | Leukemia, MESH:D015470     | Calcitriol C | 32.47 | 30  |
| PPARG   | 5468   | Leukemia, MESH:D01marker/m | alpha-Toc    | 32.46 | 274 |
| ARF1    | 375    | Leukemia, MESH:D015470     | Arsenic Tr   | 32.46 | 23  |
| CDC34   | 997    | Leukemia, MESH:D015470     | Arsenic Tr   | 32.46 | 23  |
| SLC44A1 | 23446  | Leukemia, MESH:D015470     | Arsenic Tr   | 32.46 | 23  |
| TCF12   | 6938   | Leukemia, MESH:D015470     | Calcitriol C | 32.46 | 87  |
| XRCC2   | 7516   | Leukemia, MESH:D015470     | Calcitriol C | 32.46 | 31  |
| ENO1    | 2023   | Leukemia, MESH:D015470     | Decitabine   | 32.45 | 40  |
| TCF12   | 6938   | Leukemia, MESH:D015473     | Arsenic Ar   | 32.43 | 164 |
| DMD     | 1756   | Leukemia, MESH:D015473     | arsenite D   | 32.42 | 163 |
| MED13   | 9969   | Leukemia, MESH:D015470     | Calcitriol C | 32.42 | 19  |
| SKA3    | 221150 | Leukemia, MESH:D015470     | Calcitriol C | 32.42 | 16  |
| ZHX3    | 23051  | Leukemia, MESH:D015470     | Arsenic Tr   | 32.42 | 25  |
| CCND2   | 894    | Leukemia, MESH:D015473     | alpha-Toc    | 32.41 | 268 |
| PIK3R1  | 5295   | Leukemia, MESH:D015473     | Antimony     | 32.41 | 270 |
| TPM4    | 7171   | Leukemia, MESH:D015470     | Arsenic Tr   | 32.4  | 35  |
| CDCA2   | 157313 | Leukemia, MESH:D015470     | Benzene C    | 32.37 | 40  |
| ZBTB20  | 26137  | Leukemia, MESH:D015470     | Daunorub     | 32.37 | 46  |
| GOT1    | 2805   | Leukemia, MESH:D015470     | Air Polluta  | 32.34 | 29  |
| MTOR    | 2475   | Leukemia, MESH:D015473     | Arsenic Ar   | 32.34 | 175 |
| PRKCD   | 5580   | Leukemia, MESH:D015473     | Arsenic Tr   | 32.33 | 272 |
| SON     | 6651   | Leukemia, MESH:D015470     | Arsenic Tr   | 32.33 | 42  |
| FGR     | 2268   | Leukemia, MESH:D015473     | Arsenic Tr   | 32.32 | 266 |
| GDF15   | 9518   | Leukemia, MESH:D015473     | Arsenic Ar   | 32.3  | 273 |
| HLA-DRA | 3122   | Leukemia, MESH:D015473     | Arsenic Ar   | 32.3  | 267 |
| ZSCAN31 | 64288  | Leukemia, MESH:D015470     | Arsenic Tr   | 32.3  | 86  |
| ACKR3   | 57007  | Leukemia, MESH:D015470     | Calcitriol C | 32.28 | 20  |
| SLC7A2  | 6542   | Leukemia, MESH:D015470     | Calcitriol C | 32.28 | 85  |
| ABCB1B  | 18669  | Leukemia, MESH:D015470     | Dexameth     | 32.27 | 27  |
| SDC1    | 6382   | Leukemia, MESH:D015473     | Arsenic Ar   | 32.27 | 268 |
| ZWINT   | 11130  | Leukemia, MESH:D015473     | Antimony     | 32.27 | 264 |
| IL12B   | 3593   | Leukemia, MESH:D015473     | Arsenic Ar   | 32.26 | 267 |
| GJB2    | 2706   | Leukemia, MESH:D015470     | Calcitriol C | 32.24 | 17  |
| H4C3    | 8364   | Leukemia, MESH:D015473     | Antimony     | 32.22 | 269 |
| ANXA11  | 311    | Leukemia, MESH:D015470     | Arsenic Tr   | 32.21 | 23  |
| ARHGAP5 | 394    | Leukemia, MESH:D015470     | Arsenic Tr   | 32.21 | 29  |
| BCOR    | 54880  | Leukemia, MESH:D015470     | Decitabine   | 32.21 | 29  |
| SCARA3  | 51435  | Leukemia, MESH:D015470     | Arsenic Tr   | 32.21 | 27  |
| SRPX    | 8406   | Leukemia, MESH:D015470     | Arsenic Tr   | 32.21 | 27  |
| IKBKB   | 3551   | Leukemia, MESH:D015473     | alpha-Toc    | 32.2  | 269 |
| TK1     | 7083   | Leukemia, MESH:D015473     | Arsenic Tr   | 32.19 | 267 |
| GTSE1   | 51512  | Leukemia, MESH:D015470     | Calcitriol C | 32.18 | 21  |
| LAMB3   | 3914   | Leukemia, MESH:D015470     | Arsenic Tr   | 32.18 | 25  |
| ACAA2   | 10449  | Leukemia, MESH:D015470     | 15-deoxy-    | 32.16 | 29  |
| CAV1    | 857    | Leukemia, MESH:D015473     | 2-(2-chlor   | 32.16 | 266 |
| PCNA    | 5111   | Leukemia, MESH:D015473     | alpha-Toc    | 32.16 | 273 |
| TH      | 7054   | Leukemia, MESH:D015470     | 15-deoxy-    | 32.15 | 102 |
| TH      | 7054   | Leukemia, MESH:D015473     | alpha-Toc    | 32.13 | 271 |
| ATP2A3  | 489    | Leukemia, MESH:D015473     | Arsenic Ar   | 32.12 | 267 |
| CD9     | 928    | Leukemia, MESH:D01marker/m | Arsenic Tr   | 32.08 | 46  |
| CAV2    | 858    | Leukemia, MESH:D015470     | Arsenic Tr   | 32.08 | 27  |
| CD47    | 961    | Leukemia, MESH:D015470     | Benzene C    | 32.08 | 36  |

|          |        |                            |              |       |     |
|----------|--------|----------------------------|--------------|-------|-----|
| DCTD     | 1635   | Leukemia, MESH:D015470     | Arsenic Tr   | 32.08 | 23  |
| DEPP1    | 11067  | Leukemia, MESH:D015470     | Calcitriol C | 32.08 | 23  |
| DUSP5    | 1847   | Leukemia, MESH:D015470     | Arsenic Tr   | 32.08 | 27  |
| FOXM1    | 2305   | Leukemia, MESH:D015470     | Arsenic Tr   | 32.08 | 29  |
| HSD11B2  | 3291   | Leukemia, MESH:D015470     | Calcitriol C | 32.08 | 28  |
| LCN2     | 3934   | Leukemia, MESH:D015473     | Arsenic Tr   | 32.08 | 262 |
| LDB3     | 11155  | Leukemia, MESH:D015470     | Air Polluta  | 32.08 | 53  |
| NPPA     | 4878   | Leukemia, MESH:D015470     | 2-(2-chlor   | 32.08 | 54  |
| NR1H3    | 10062  | Leukemia, MESH:D015470     | Alitretinoi  | 32.08 | 43  |
| NUCB2    | 4925   | Leukemia, MESH:D015470     | Arsenic Tr   | 32.08 | 26  |
| PCYOX1   | 51449  | Leukemia, MESH:D015470     | Air Polluta  | 32.08 | 33  |
| PKNOX2   | 63876  | Leukemia, MESH:D015470     | Arsenic Tr   | 32.08 | 27  |
| POLE2    | 5427   | Leukemia, MESH:D015470     | Calcitriol C | 32.08 | 19  |
| TAPBP    | 6892   | Leukemia, MESH:D015470     | Air Polluta  | 32.08 | 19  |
| WNT5A    | 7474   | Leukemia, MESH:D015470     | Azacididin   | 32.08 | 32  |
| DUSP10   | 11221  | Leukemia, MESH:D015473     | Arsenic Ar   | 32.06 | 272 |
| NHLRC3   | 387921 | Leukemia, MESH:D015470     | Decitabine   | 32.06 | 24  |
| CD68     | 968    | Leukemia, MESH:D015473     | Arsenic Bu   | 32.03 | 164 |
| KIF4A    | 24137  | Leukemia, MESH:D015473     | Arsenic ar   | 32.02 | 159 |
| MATN2    | 4147   | Leukemia, MESH:D015473     | Arsenic Ar   | 32.02 | 267 |
| DNMT3A   | 1788   | Leukemia, MESH:D01marker/m | Alitretinoi  | 32.01 | 52  |
| EIF4EBP1 | 1978   | Leukemia, MESH:D015473     | 2-(2-chlor   | 32    | 272 |
| MARCKS   | 4082   | Leukemia, MESH:D015470     | Air Polluta  | 32    | 30  |
| WRN      | 7486   | Leukemia, MESH:D015473     | Arsenic Ar   | 31.99 | 266 |
| TUBB     | 203068 | Leukemia, MESH:D015470     | Dexameth     | 31.98 | 20  |
| MOCOS    | 55034  | Leukemia, MESH:D015470     | Arsenic Tr   | 31.96 | 41  |
| MSX2     | 4488   | Leukemia, MESH:D015470     | Antifungal   | 31.96 | 27  |
| NAV1     | 89796  | Leukemia, MESH:D015470     | Calcitriol C | 31.96 | 25  |
| PTPRG    | 5793   | Leukemia, MESH:D015470     | Decitabine   | 31.96 | 29  |
| CYP2C8   | 1558   | Leukemia, MESH:D015470     | Bezafibrat   | 31.95 | 24  |
| INHBA    | 3624   | Leukemia, MESH:D015470     | Arsenic Tr   | 31.95 | 36  |
| COL1A1   | 1277   | Leukemia, MESH:D015473     | alpha-Toc    | 31.93 | 269 |
| IL6ST    | 3572   | Leukemia, MESH:D015470     | Arsenic Tr   | 31.93 | 33  |
| AGR2     | 10551  | Leukemia, MESH:D015473     | Arsenic Ar   | 31.92 | 267 |
| DHRS3    | 9249   | Leukemia, MESH:D015473     | Arsenic ar   | 31.92 | 165 |
| LYN      | 4067   | Leukemia, MESH:D015473     | alpha-Toc    | 31.92 | 165 |
| MYH6     | 4624   | Leukemia, MESH:D015473     | Arsenic Tr   | 31.92 | 266 |
| RCAN1    | 1827   | Leukemia, MESH:D015473     | Arsenic ar   | 31.92 | 161 |
| RHOQ     | 23433  | Leukemia, MESH:D015473     | Arsenic Ar   | 31.92 | 269 |
| SERPINB1 | 1992   | Leukemia, MESH:D015473     | Antimony     | 31.92 | 266 |
| TRMT1    | 55621  | Leukemia, MESH:D015470     | Arsenic Tr   | 31.92 | 22  |
| ERO1A    | 30001  | Leukemia, MESH:D015470     | Calcitriol C | 31.89 | 21  |
| HDAC2    | 3066   | Leukemia, MESH:D015470     | 15-deoxy-    | 31.89 | 31  |
| IKBK     | 8517   | Leukemia, MESH:D015470     | Arsenic Tr   | 31.89 | 34  |
| NPC1     | 4864   | Leukemia, MESH:D015470     | Arsenic Tr   | 31.89 | 67  |
| SNAI2    | 6591   | Leukemia, MESH:D015473     | Arsenic Ar   | 31.88 | 270 |
| ZNF282   | 8427   | Leukemia, MESH:D015470     | Cytarabine   | 31.88 | 84  |
| CD36     | 948    | Leukemia, MESH:D015473     | alpha-Toc    | 31.86 | 270 |
| ALDH1A3  | 220    | Leukemia, MESH:D015470     | Arsenic Tr   | 31.85 | 28  |
| CYP7A1   | 1581   | Leukemia, MESH:D015470     | Alitretinoi  | 31.84 | 24  |
| NFE2L3   | 9603   | Leukemia, MESH:D015470     | Arsenic Tr   | 31.84 | 41  |
| OIP5     | 11339  | Leukemia, MESH:D015470     | Calcitriol C | 31.84 | 21  |
| RFC5     | 5985   | Leukemia, MESH:D015470     | Dasatinib    | 31.84 | 21  |
| SERPINB1 | 1992   | Leukemia, MESH:D015470     | Arsenic Tr   | 31.84 | 26  |
| SIPA1L2  | 57568  | Leukemia, MESH:D015470     | Calcitriol C | 31.84 | 88  |
| COL21A1  | 81578  | Leukemia, MESH:D015470     | Arsenic Tr   | 31.83 | 22  |
| FAM149B  | 317662 | Leukemia, MESH:D015470     | Decitabine   | 31.83 | 23  |
| INHBA    | 3624   | Leukemia, MESH:D015473     | Arsenic Ar   | 31.83 | 267 |

|          |        |                        |              |       |     |
|----------|--------|------------------------|--------------|-------|-----|
| MBP      | 4155   | Leukemia, MESH:D015473 | alpha-Toc    | 31.83 | 270 |
| TNFRSF10 | 8794   | Leukemia, MESH:D015470 | Arsenic Tr   | 31.83 | 24  |
| CDK4     | 1019   | Leukemia, MESH:D015473 | alvocidib /  | 31.8  | 266 |
| CREB1    | 1385   | Leukemia, MESH:D015473 | alpha-Toc    | 31.79 | 271 |
| FABP7    | 2173   | Leukemia, MESH:D015470 | Arsenic Tr   | 31.79 | 92  |
| HNRNPk   | 3190   | Leukemia, MESH:D015470 | Arsenic Tr   | 31.79 | 26  |
| PDLIM1   | 9124   | Leukemia, MESH:D015470 | Decitabine   | 31.79 | 28  |
| WARS1    | 7453   | Leukemia, MESH:D015470 | Arsenic Tr   | 31.79 | 34  |
| AK5      | 26289  | Leukemia, MESH:D015470 | Azacitidine  | 31.76 | 14  |
| GCLM     | 2730   | Leukemia, MESH:D015473 | alpha-Toc    | 31.76 | 268 |
| HAND2    | 9464   | Leukemia, MESH:D015470 | Cytarabine   | 31.76 | 97  |
| VPS13B   | 157680 | Leukemia, MESH:D015470 | Dexameth     | 31.76 | 20  |
| VPS13D   | 55187  | Leukemia, MESH:D015470 | Dexameth     | 31.76 | 16  |
| ZCCHC2   | 54877  | Leukemia, MESH:D015470 | Benzene B    | 31.76 | 35  |
| PLA2G4A  | 5321   | Leukemia, MESH:D015470 | Arsenic Tr   | 31.75 | 45  |
| HHIP     | 64399  | Leukemia, MESH:D015470 | Calcitriol C | 31.72 | 25  |
| SLC25A1  | 6576   | Leukemia, MESH:D015470 | Decitabine   | 31.72 | 28  |
| CD55     | 1604   | Leukemia, MESH:D015470 | Arsenic Tr   | 31.7  | 47  |
| FBXO5    | 26271  | Leukemia, MESH:D015470 | Calcitriol C | 31.7  | 23  |
| HSPA1L   | 3305   | Leukemia, MESH:D015470 | Arsenic Tr   | 31.7  | 26  |
| ABC1A    | 18671  | Leukemia, MESH:D015470 | Bortezomi    | 31.68 | 48  |
| RUNX2    | 860    | Leukemia, MESH:D015473 | Arsenic Ar   | 31.68 | 271 |
| PRDX2    | 7001   | Leukemia, MESH:D015473 | Arsenic Ar   | 31.67 | 269 |
| LUM      | 4060   | Leukemia, MESH:D015473 | Calcitriol C | 31.65 | 160 |
| DDIT4    | 54541  | Leukemia, MESH:D015473 | Arsenic Tr   | 31.64 | 265 |
| RRAS     | 6237   | Leukemia, MESH:D015473 | Arsenic Ar   | 31.63 | 267 |
| APC      | 324    | Leukemia, MESH:D015470 | Air Polluta  | 31.62 | 22  |
| E2F8     | 79733  | Leukemia, MESH:D015470 | Arsenic Tr   | 31.62 | 95  |
| P4HB     | 5034   | Leukemia, MESH:D015470 | Allopurinc   | 31.62 | 30  |
| PAWR     | 5074   | Leukemia, MESH:D015470 | alvocidib /  | 31.61 | 21  |
| PCLAF    | 9768   | Leukemia, MESH:D015470 | Calcitriol C | 31.61 | 17  |
| SFRP2    | 6423   | Leukemia, MESH:D015470 | Arsenic Tr   | 31.61 | 97  |
| SRSF7    | 6432   | Leukemia, MESH:D015470 | Arsenic Tr   | 31.61 | 27  |
| ADAM19   | 8728   | Leukemia, MESH:D015470 | Calcitriol C | 31.6  | 91  |
| BCL2L12  | 83596  | Leukemia, MESH:D015470 | Arsenic Tr   | 31.6  | 26  |
| CDC14B   | 8555   | Leukemia, MESH:D015470 | Air Polluta  | 31.6  | 21  |
| CMIP     | 80790  | Leukemia, MESH:D015470 | Arsenic Tr   | 31.6  | 49  |
| GCNT2    | 2651   | Leukemia, MESH:D015470 | Azacitidine  | 31.6  | 86  |
| VGLL4    | 9686   | Leukemia, MESH:D015470 | Arsenic Tr   | 31.6  | 89  |
| GPX1     | 2876   | Leukemia, MESH:D015473 | Arsenic Ar   | 31.57 | 275 |
| CFB      | 629    | Leukemia, MESH:D015470 | Arsenic Tr   | 31.55 | 40  |
| PLD1     | 5337   | Leukemia, MESH:D015470 | Benzene C    | 31.55 | 42  |
| ZNF397   | 84307  | Leukemia, MESH:D015470 | Dexameth     | 31.53 | 16  |
| ATP1A2   | 477    | Leukemia, MESH:D015470 | Calcitriol C | 31.52 | 62  |
| COTL1    | 23406  | Leukemia, MESH:D015470 | Arsenic Tr   | 31.52 | 25  |
| HMGB1    | 3146   | Leukemia, MESH:D015473 | Arsenic Tr   | 31.52 | 169 |
| SLC2A2   | 6514   | Leukemia, MESH:D015473 | Arsenic Tr   | 31.52 | 264 |
| SOCS3    | 9021   | Leukemia, MESH:D015470 | 15-deoxy-    | 31.52 | 50  |
| VIM      | 7431   | Leukemia, MESH:D015473 | Arsenic Ar   | 31.52 | 275 |
| ALDH1A1  | 216    | Leukemia, MESH:D015473 | Arsenic Ar   | 31.51 | 268 |
| HSD17B2  | 3294   | Leukemia, MESH:D015473 | Antimony     | 31.51 | 266 |
| EMP3     | 2014   | Leukemia, MESH:D015470 | Arsenic Tr   | 31.48 | 38  |
| LPXN     | 9404   | Leukemia, MESH:D015470 | Air Polluta  | 31.48 | 33  |
| NAV3     | 89795  | Leukemia, MESH:D015470 | Arsenic Tr   | 31.48 | 23  |
| PERP     | 64065  | Leukemia, MESH:D015470 | alvocidib C  | 31.48 | 29  |
| RANBP1   | 5902   | Leukemia, MESH:D015470 | Doxorubic    | 31.48 | 21  |
| RBBP8    | 5932   | Leukemia, MESH:D015470 | Calcitriol C | 31.48 | 32  |
| SRXN1    | 140809 | Leukemia, MESH:D015473 | Antimony     | 31.48 | 268 |

|          |        |                            |              |       |     |
|----------|--------|----------------------------|--------------|-------|-----|
| CD74     | 972    | Leukemia, MESH:D015470     | Arsenic Tr   | 31.47 | 41  |
| STC2     | 8614   | Leukemia, MESH:D015470     | Arsenic Tr   | 31.47 | 33  |
| BCL2A1   | 597    | Leukemia, MESH:D015473     | Arsenic Tr   | 31.45 | 267 |
| TCEA2    | 6919   | Leukemia, MESH:D01marker/m | Calcitriol C | 31.44 | 28  |
| DMXL2    | 23312  | Leukemia, MESH:D015470     | Air Polluta  | 31.44 | 20  |
| GEMIN4   | 50628  | Leukemia, MESH:D015470     | Calcitriol C | 31.44 | 19  |
| LGALS3   | 3958   | Leukemia, MESH:D015470     | Arsenic Tr   | 31.44 | 41  |
| MTFR2    | 113115 | Leukemia, MESH:D015470     | Calcitriol C | 31.44 | 17  |
| TMEM106  | 79022  | Leukemia, MESH:D015470     | Dexameth     | 31.44 | 21  |
| LCK      | 3932   | Leukemia, MESH:D015470     | Crizotinib   | 31.42 | 16  |
| NR2F2    | 7026   | Leukemia, MESH:D015470     | Arsenic Tr   | 31.42 | 25  |
| KITLG    | 4254   | Leukemia, MESH:D015470     | Arsenic Tr   | 31.4  | 67  |
| MTTP     | 4547   | Leukemia, MESH:D015470     | Alitretinoin | 31.4  | 17  |
| NGF      | 4803   | Leukemia, MESH:D015473     | Arsenic Ar   | 31.4  | 163 |
| NGFR     | 4804   | Leukemia, MESH:D015470     | Calcitriol C | 31.4  | 29  |
| PCK1     | 5105   | Leukemia, MESH:D015473     | alpha-Toc    | 31.4  | 265 |
| SERPINA1 | 5265   | Leukemia, MESH:D015470     | Arsenic Tr   | 31.4  | 98  |
| BIVM     | 54841  | Leukemia, MESH:D015470     | Dexameth     | 31.38 | 18  |
| DACT3    | 147906 | Leukemia, MESH:D015470     | Calcitriol C | 31.38 | 22  |
| ISG20L2  | 81875  | Leukemia, MESH:D015470     | Doxorubic    | 31.38 | 24  |
| TBX6     | 6911   | Leukemia, MESH:D015470     | Arsenic Tr   | 31.38 | 20  |
| YDJC     | 150223 | Leukemia, MESH:D015470     | Dexameth     | 31.38 | 18  |
| AFF4     | 27125  | Leukemia, MESH:D015470     | Arsenic Tr   | 31.36 | 26  |
| DDR1     | 780    | Leukemia, MESH:D015470     | Calcitriol C | 31.36 | 26  |
| MR1      | 3140   | Leukemia, MESH:D015470     | Arsenic Tr   | 31.36 | 34  |
| PCOLCE   | 5118   | Leukemia, MESH:D015470     | Arsenic Tr   | 31.36 | 26  |
| PPT1     | 5538   | Leukemia, MESH:D015470     | Chloroqui    | 31.36 | 19  |
| PRDX1    | 5052   | Leukemia, MESH:D015470     | Air Polluta  | 31.36 | 39  |
| SCPEP1   | 59342  | Leukemia, MESH:D015470     | Arsenic Tr   | 31.36 | 30  |
| GADD45G  | 10912  | Leukemia, MESH:D015473     | Calcitriol C | 31.33 | 158 |
| IL13RA1  | 3597   | Leukemia, MESH:D015470     | Benzene C    | 31.33 | 41  |
| LAMA3    | 3909   | Leukemia, MESH:D015470     | Alitretinoin | 31.33 | 24  |
| CPT1B    | 1375   | Leukemia, MESH:D015470     | Arsenic Tr   | 31.32 | 30  |
| HSD17B4  | 3295   | Leukemia, MESH:D015470     | Air Polluta  | 31.32 | 32  |
| MCM4     | 4173   | Leukemia, MESH:D015470     | Arsenic Tr   | 31.32 | 36  |
| PRLR     | 5618   | Leukemia, MESH:D015470     | Benzene C    | 31.32 | 37  |
| ABCB4    | 5244   | Leukemia, MESH:D015470     | Arsenic Tr   | 31.31 | 33  |
| NR1I2    | 8856   | Leukemia, MESH:D015473     | alpha-Toc    | 31.3  | 161 |
| GFI1     | 2672   | Leukemia, MESH:D01marker/m | Benzene C    | 31.29 | 39  |
| PAK1IP1  | 55003  | Leukemia, MESH:D015470     | Calcitriol C | 31.29 | 17  |
| SOX9     | 6662   | Leukemia, MESH:D015470     | Azacitidine  | 31.26 | 31  |
| COL3A1   | 1281   | Leukemia, MESH:D015473     | arsenite C   | 31.25 | 162 |
| CSRP3    | 8048   | Leukemia, MESH:D015470     | Arsenic Tr   | 31.25 | 27  |
| FOSL2    | 2355   | Leukemia, MESH:D015470     | Androgen     | 31.25 | 44  |
| HSPE1    | 3336   | Leukemia, MESH:D015470     | Calcitriol C | 31.25 | 30  |
| KIF2C    | 11004  | Leukemia, MESH:D015473     | arsenite C   | 31.25 | 158 |
| LBR      | 3930   | Leukemia, MESH:D015470     | Air Polluta  | 31.25 | 19  |
| PAPPA    | 5069   | Leukemia, MESH:D015470     | Arsenic Tr   | 31.25 | 25  |
| SIRPA    | 140885 | Leukemia, MESH:D015470     | Arsenic Tr   | 31.25 | 35  |
| SPC24    | 147841 | Leukemia, MESH:D015470     | Calcitriol C | 31.25 | 18  |
| TP53I3   | 9540   | Leukemia, MESH:D015473     | Calcitriol C | 31.25 | 161 |
| WNT3A    | 89780  | Leukemia, MESH:D015470     | Decitabine   | 31.25 | 30  |
| E2F2     | 1870   | Leukemia, MESH:D015470     | Arsenic Tr   | 31.24 | 29  |
| RHOC     | 389    | Leukemia, MESH:D015470     | Arsenic Tr   | 31.24 | 98  |
| TYMP     | 1890   | Leukemia, MESH:D015470     | Arsenic Tr   | 31.24 | 28  |
| CD86     | 942    | Leukemia, MESH:D015473     | Arsenic Ar   | 31.21 | 268 |
| SCARB1   | 949    | Leukemia, MESH:D015470     | Alitretinoin | 31.2  | 20  |
| ATP1B1   | 481    | Leukemia, MESH:D01marker/m | Alitretinoin | 31.18 | 100 |

|          |        |                            |              |       |     |
|----------|--------|----------------------------|--------------|-------|-----|
| IL24     | 11009  | Leukemia, MESH:D015470     | Alitretinoin | 31.18 | 34  |
| MGP      | 4256   | Leukemia, MESH:D015470     | Arsenic Tr   | 31.18 | 92  |
| SKP2     | 6502   | Leukemia, MESH:D015473     | Arsenic Ar   | 31.18 | 272 |
| UCHL1    | 7345   | Leukemia, MESH:D015470     | Arsenic Tr   | 31.18 | 43  |
| AR       | 367    | Leukemia, MESH:D015473     | Antimony     | 31.15 | 269 |
| C1QA     | 712    | Leukemia, MESH:D015470     | Cyclophos    | 31.15 | 24  |
| FGF7     | 2252   | Leukemia, MESH:D015470     | Androgen     | 31.15 | 30  |
| HNRNPA2  | 3181   | Leukemia, MESH:D015470     | Alitretinoin | 31.15 | 34  |
| KRT5     | 3852   | Leukemia, MESH:D015470     | Alitretinoin | 31.15 | 23  |
| OGDH     | 4967   | Leukemia, MESH:D015470     | Air Polluta  | 31.15 | 24  |
| RACGAP1  | 29127  | Leukemia, MESH:D015470     | Arsenic Tr   | 31.15 | 26  |
| TNFRSF19 | 55504  | Leukemia, MESH:D015470     | Calcitriol C | 31.15 | 84  |
| ANKH     | 56172  | Leukemia, MESH:D015470     | Benzene C    | 31.14 | 33  |
| APLP2    | 334    | Leukemia, MESH:D015470     | Air Polluta  | 31.14 | 29  |
| ARHGAP1  | 93663  | Leukemia, MESH:D015470     | Arsenic Tr   | 31.14 | 40  |
| BCL2L2   | 599    | Leukemia, MESH:D015470     | ABT-737 A    | 31.14 | 30  |
| CPA4     | 51200  | Leukemia, MESH:D015470     | Calcitriol C | 31.14 | 13  |
| EIF5A2   | 56648  | Leukemia, MESH:D015470     | Arsenic Tr   | 31.14 | 22  |
| GPC6     | 10082  | Leukemia, MESH:D015470     | Arsenic Tr   | 31.14 | 29  |
| NANOS1   | 340719 | Leukemia, MESH:D015470     | Cyclophos    | 31.14 | 14  |
| NCK1     | 4690   | Leukemia, MESH:D015470     | Decitabine   | 31.14 | 21  |
| PPP1R13L | 10848  | Leukemia, MESH:D015470     | Daunorub     | 31.14 | 48  |
| PRKAR2B  | 5577   | Leukemia, MESH:D015470     | Dexameth     | 31.14 | 19  |
| ZMYM2    | 7750   | Leukemia, MESH:D015470     | Arsenic Tr   | 31.14 | 23  |
| ADIPOQ   | 9370   | Leukemia, MESH:D015470     | 15-deoxy-    | 31.13 | 112 |
| LSAMP    | 4045   | Leukemia, MESH:D015473     | Arsenic Ar   | 31.12 | 268 |
| ORM1     | 5004   | Leukemia, MESH:D015470     | Calcitriol C | 31.1  | 28  |
| CCNA1    | 8900   | Leukemia, MESH:D015470     | Arsenic Tr   | 31.07 | 32  |
| KCNJ2    | 3759   | Leukemia, MESH:D015473     | Arsenic Ar   | 31.07 | 270 |
| NID2     | 22795  | Leukemia, MESH:D015473     | arsenite C   | 31.07 | 13  |
| PODXL    | 5420   | Leukemia, MESH:D015470     | Arsenic Tr   | 31.07 | 91  |
| SLC19A1  | 6573   | Leukemia, MESH:D015470     | Decitabine   | 31.07 | 28  |
| SIRT1    | 23411  | Leukemia, MESH:D015470     | Arsenic Tr   | 31.05 | 34  |
| BTG1     | 694    | Leukemia, MESH:D015470     | Arsenic Tr   | 31.03 | 43  |
| FBXO32   | 114907 | Leukemia, MESH:D015470     | Arsenic Tr   | 31.03 | 28  |
| CBX5     | 23468  | Leukemia, MESH:D015470     | Doxorubic    | 31.02 | 23  |
| CKAP4    | 10970  | Leukemia, MESH:D015470     | Arsenic Tr   | 31.02 | 26  |
| LAMA1    | 284217 | Leukemia, MESH:D015470     | Azacididine  | 31.02 | 28  |
| LRP8     | 7804   | Leukemia, MESH:D015470     | Dexameth     | 31.02 | 22  |
| NDRG4    | 65009  | Leukemia, MESH:D015470     | Arsenic Tr   | 31.02 | 30  |
| NFE2L1   | 4779   | Leukemia, MESH:D015470     | Arsenic Tr   | 31.02 | 35  |
| SDCBP    | 6386   | Leukemia, MESH:D015470     | Arsenic Tr   | 31.02 | 23  |
| SEMA6D   | 80031  | Leukemia, MESH:D015470     | Arsenic Tr   | 31.02 | 24  |
| SULT1C2  | 6819   | Leukemia, MESH:D015470     | Arsenic Tr   | 31.02 | 23  |
| TPR      | 7175   | Leukemia, MESH:D015470     | Dexameth     | 31.02 | 20  |
| STMN1    | 3925   | Leukemia, MESH:D015470     | Androgen     | 31.01 | 37  |
| DHX15    | 1665   | Leukemia, MESH:D01marker/m | Air Polluta  | 30.99 | 23  |
| CST3     | 1471   | Leukemia, MESH:D015473     | Arsenic Ar   | 30.99 | 268 |
| EVA1A    | 84141  | Leukemia, MESH:D015470     | Calcitriol C | 30.99 | 17  |
| NETO2    | 81831  | Leukemia, MESH:D015470     | Arsenic Tr   | 30.99 | 22  |
| ANLN     | 54443  | Leukemia, MESH:D015470     | Benzene C    | 30.98 | 36  |
| EGF      | 1950   | Leukemia, MESH:D015473     | 2-(2-chlor   | 30.98 | 269 |
| STOM     | 2040   | Leukemia, MESH:D015473     | Arsenic Ar   | 30.98 | 163 |
| XRCC6    | 2547   | Leukemia, MESH:D015473     | alpha-Toc    | 30.98 | 175 |
| H3-3B    | 3021   | Leukemia, MESH:D015470     | Doxorubic    | 30.96 | 18  |
| ZNF148   | 7707   | Leukemia, MESH:D015470     | Dexameth     | 30.96 | 18  |
| CEBPA    | 1050   | Leukemia, MESH:D01marker/m | Antimony     | 30.95 | 268 |
| HSPD1    | 3329   | Leukemia, MESH:D015473     | Arsenic Ar   | 30.95 | 269 |

|           |        |                            |              |       |     |
|-----------|--------|----------------------------|--------------|-------|-----|
| MTOR      | 2475   | Leukemia, MESH:D015470     | 15-deoxy-    | 30.95 | 59  |
| TAGLN     | 6876   | Leukemia, MESH:D015473     | Arsenic Ar   | 30.94 | 273 |
| GFAP      | 2670   | Leukemia, MESH:D015470     | 15-deoxy-    | 30.92 | 38  |
| H1-2      | 3006   | Leukemia, MESH:D01marker/m | Arsenic Tr   | 30.91 | 96  |
| ITGAX     | 3687   | Leukemia, MESH:D015470     | Alitretinoi  | 30.91 | 27  |
| TYROBP    | 7305   | Leukemia, MESH:D015470     | Calcitriol C | 30.91 | 25  |
| BCAT1     | 586    | Leukemia, MESH:D015470     | Azacitidin   | 30.89 | 33  |
| CCND3     | 896    | Leukemia, MESH:D015473     | Arsenic Ar   | 30.89 | 272 |
| IL15      | 3600   | Leukemia, MESH:D015470     | Arsenic Tr   | 30.89 | 22  |
| LIFR      | 3977   | Leukemia, MESH:D015470     | Calcitriol C | 30.89 | 21  |
| PTPRF     | 5792   | Leukemia, MESH:D015470     | Benzene C    | 30.89 | 35  |
| SOCS2     | 8835   | Leukemia, MESH:D015470     | Alitretinoi  | 30.89 | 27  |
| TIMP3     | 7078   | Leukemia, MESH:D015473     | Arsenic Tr   | 30.89 | 265 |
| C1ORF43   | 25912  | Leukemia, MESH:D015470     | Bortezomi    | 30.88 | 15  |
| LINC0031: | 29931  | Leukemia, MESH:D015470     | Cytarabine   | 30.88 | 77  |
| ZNF580    | 51157  | Leukemia, MESH:D015470     | Bortezomi    | 30.88 | 17  |
| CLCN5     | 1184   | Leukemia, MESH:D015470     | Dexameth     | 30.84 | 18  |
| MLF1      | 4291   | Leukemia, MESH:D015470     | Air Polluta  | 30.84 | 18  |
| MYO5C     | 55930  | Leukemia, MESH:D015470     | Arsenic Tr   | 30.84 | 17  |
| NDUFS8    | 4728   | Leukemia, MESH:D015470     | Arsenic Tr   | 30.84 | 32  |
| PTK2      | 5747   | Leukemia, MESH:D015470     | Benzene C    | 30.84 | 35  |
| STS       | 412    | Leukemia, MESH:D015470     | Alitretinoi  | 30.82 | 26  |
| EZH2      | 2146   | Leukemia, MESH:D015473     | Arsenic Ar   | 30.81 | 265 |
| GBP1      | 2633   | Leukemia, MESH:D015473     | Arsenic Ca   | 30.81 | 158 |
| NFKB1     | 4790   | Leukemia, MESH:D015473     | alpha-Toc    | 30.81 | 267 |
| PKP2      | 5318   | Leukemia, MESH:D015473     | arsenite Ci  | 30.81 | 160 |
| GABARAP   | 23710  | Leukemia, MESH:D015470     | Air Polluta  | 30.8  | 106 |
| NTRK1     | 4914   | Leukemia, MESH:D015470     | Arsenic Tr   | 30.8  | 20  |
| PPFIBP1   | 8496   | Leukemia, MESH:D015470     | Calcitriol C | 30.8  | 20  |
| RND1      | 27289  | Leukemia, MESH:D015470     | Calcitriol C | 30.8  | 29  |
| TSC22D3   | 1831   | Leukemia, MESH:D015470     | Arsenic Tr   | 30.78 | 35  |
| F3        | 2152   | Leukemia, MESH:D01marker/m | Arsenic Ar   | 30.76 | 274 |
| ACBD7     | 414149 | Leukemia, MESH:D015470     | Calcitriol C | 30.75 | 11  |
| APOBEC3:  | 27350  | Leukemia, MESH:D015470     | Doxorubic    | 30.75 | 33  |
| COX10     | 1352   | Leukemia, MESH:D015470     | Arsenic Tr   | 30.75 | 22  |
| KRT8      | 3856   | Leukemia, MESH:D015473     | Arsenic Ar   | 30.75 | 271 |
| PTPDC1    | 138639 | Leukemia, MESH:D015470     | Arsenic Tr   | 30.75 | 27  |
| DAPK1     | 1612   | Leukemia, MESH:D015473     | Arsenic ars  | 30.74 | 163 |
| VWF       | 7450   | Leukemia, MESH:D015473     | Arsenic Ar   | 30.74 | 163 |
| CALR      | 811    | Leukemia, MESH:D015470     | Arsenic Tr   | 30.72 | 38  |
| HOPX      | 84525  | Leukemia, MESH:D015473     | Antimony     | 30.72 | 266 |
| MACF1     | 23499  | Leukemia, MESH:D015473     | Arsenic Ar   | 30.72 | 270 |
| MSMO1     | 6307   | Leukemia, MESH:D015470     | Arsenic Tr   | 30.72 | 36  |
| SDC1      | 6382   | Leukemia, MESH:D015470     | Air Polluta  | 30.72 | 57  |
| TP73      | 7161   | Leukemia, MESH:D015473     | 2-(2-chlor   | 30.72 | 267 |
| CDC25C    | 995    | Leukemia, MESH:D015473     | Arsenic Ar   | 30.71 | 267 |
| CBX1      | 10951  | Leukemia, MESH:D015470     | Dexameth     | 30.7  | 19  |
| EXOSC5    | 56915  | Leukemia, MESH:D015470     | Arsenic Tr   | 30.7  | 24  |
| MAPK7     | 5598   | Leukemia, MESH:D015470     | Arsenic Tr   | 30.7  | 26  |
| STK38     | 11329  | Leukemia, MESH:D015470     | Air Polluta  | 30.7  | 21  |
| KCTD12    | 115207 | Leukemia, MESH:D015470     | Arsenic Tr   | 30.69 | 90  |
| KRT23     | 25984  | Leukemia, MESH:D015470     | Calcitriol C | 30.69 | 22  |
| NR4A1     | 3164   | Leukemia, MESH:D015470     | Arsenic Tr   | 30.69 | 44  |
| EEF2      | 1938   | Leukemia, MESH:D015470     | Arsenic Tr   | 30.68 | 107 |
| MMP7      | 4316   | Leukemia, MESH:D015473     | Arsenic Tr   | 30.68 | 264 |
| GAPDH     | 2597   | Leukemia, MESH:D015473     | Antimony     | 30.65 | 266 |
| IMPDH2    | 3615   | Leukemia, MESH:D015473     | Arsenic Tr   | 30.64 | 261 |
| CPEB2     | 132864 | Leukemia, MESH:D015473     | arsenite Ci  | 30.63 | 159 |



|          |        |                            |              |       |     |
|----------|--------|----------------------------|--------------|-------|-----|
| RGS1     | 5996   | Leukemia, MESH:D015473     | Arsenic ars  | 30.63 | 161 |
| CFLAR    | 8837   | Leukemia, MESH:D015473     | alvocidib A  | 30.62 | 263 |
| IFIT1    | 3434   | Leukemia, MESH:D015473     | alvocidib A  | 30.62 | 160 |
| TNFRSF11 | 4982   | Leukemia, MESH:D015473     | Arsenic Tr   | 30.62 | 264 |
| XRCC1    | 7515   | Leukemia, MESH:D015473     | Arsenic ars  | 30.62 | 164 |
| TGM2     | 7052   | Leukemia, MESH:D015470     | Alitretinoi  | 30.6  | 26  |
| FTH1     | 2495   | Leukemia, MESH:D015470     | Arsenic Tr   | 30.59 | 46  |
| LIMCH1   | 22998  | Leukemia, MESH:D015470     | Calcitriol C | 30.59 | 86  |
| MAOA     | 4128   | Leukemia, MESH:D015470     | Arsenic Tr   | 30.59 | 37  |
| PCSK5    | 5125   | Leukemia, MESH:D015470     | Arsenic Tr   | 30.59 | 102 |
| DNA2     | 1763   | Leukemia, MESH:D015473     | Arsenic ars  | 30.58 | 161 |
| ZNF383   | 163087 | Leukemia, MESH:D015470     | Arsenic Tr   | 30.58 | 86  |
| PIM2     | 11040  | Leukemia, MESH:D01marker/m | Dexameth     | 30.56 | 21  |
| NMB      | 4828   | Leukemia, MESH:D015470     | Decitabine   | 30.56 | 27  |
| SKI      | 6497   | Leukemia, MESH:D015470     | Decitabine   | 30.56 | 26  |
| TMED3    | 23423  | Leukemia, MESH:D015470     | Azacitidine  | 30.56 | 26  |
| IGF1     | 3479   | Leukemia, MESH:D015473     | Arsenic Ar   | 30.55 | 272 |
| ISG20    | 3669   | Leukemia, MESH:D015470     | Calcitriol C | 30.55 | 46  |
| PTGDS    | 5730   | Leukemia, MESH:D015470     | Calcitriol C | 30.55 | 26  |
| TBC1D17  | 79735  | Leukemia, MESH:D015470     | Decitabine   | 30.55 | 22  |
| TMEM41B  | 440026 | Leukemia, MESH:D015470     | Bortezomi    | 30.55 | 14  |
| UGCG     | 7357   | Leukemia, MESH:D015470     | Dexameth     | 30.55 | 25  |
| VIT      | 5212   | Leukemia, MESH:D015470     | Arsenic Tr   | 30.55 | 26  |
| CLDN7    | 1366   | Leukemia, MESH:D015470     | Arsenic Tr   | 30.48 | 26  |
| GAS7     | 8522   | Leukemia, MESH:D015470     | Arsenic Tr   | 30.48 | 27  |
| PDE4B    | 5142   | Leukemia, MESH:D01marker/m | Arsenic Tr   | 30.47 | 103 |
| PIK3CA   | 5290   | Leukemia, MESH:D015470     | Arsenic Tr   | 30.47 | 27  |
| VAV3     | 10451  | Leukemia, MESH:D015473     | Arsenic Ar   | 30.47 | 269 |
| ALDH1A3  | 220    | Leukemia, MESH:D015473     | Antineopl    | 30.44 | 267 |
| AP2B1    | 163    | Leukemia, MESH:D015470     | Arsenic Tr   | 30.42 | 19  |
| GYPC     | 2995   | Leukemia, MESH:D015470     | Decitabine   | 30.42 | 24  |
| MECR     | 51102  | Leukemia, MESH:D015470     | Decitabine   | 30.42 | 27  |
| RRAGC    | 64121  | Leukemia, MESH:D015470     | Benzene C    | 30.42 | 30  |
| SETD5    | 55209  | Leukemia, MESH:D015470     | Benzene C    | 30.42 | 31  |
| SLFN5    | 162394 | Leukemia, MESH:D015470     | Arsenic Tr   | 30.42 | 22  |
| TOR1A    | 1861   | Leukemia, MESH:D015470     | Air Polluta  | 30.42 | 27  |
| GLRX     | 2745   | Leukemia, MESH:D015470     | Air Polluta  | 30.4  | 22  |
| MYH7     | 4625   | Leukemia, MESH:D015470     | Azacitidine  | 30.4  | 57  |
| XDH      | 7498   | Leukemia, MESH:D015470     | Allopurinc   | 30.4  | 29  |
| AHCY     | 191    | Leukemia, MESH:D015470     | Arsenic Tr   | 30.38 | 41  |
| BUB1B    | 701    | Leukemia, MESH:D015473     | Arsenic Tr   | 30.38 | 264 |
| FGL2     | 10875  | Leukemia, MESH:D015470     | Air Polluta  | 30.38 | 23  |
| GZMB     | 3002   | Leukemia, MESH:D015470     | Azacitidine  | 30.38 | 20  |
| HCK      | 3055   | Leukemia, MESH:D015473     | arsenite Ci  | 30.38 | 162 |
| IGFBP6   | 3489   | Leukemia, MESH:D015470     | Decitabine   | 30.38 | 28  |
| RAMP1    | 10267  | Leukemia, MESH:D015470     | Calcitriol C | 30.38 | 85  |
| USP7     | 7874   | Leukemia, MESH:D015470     | ABT-737 C    | 30.38 | 86  |
| FCER1G   | 2207   | Leukemia, MESH:D015470     | Arsenic Tr   | 30.37 | 30  |
| TXNRD1   | 7296   | Leukemia, MESH:D015473     | Antimony     | 30.36 | 267 |
| PALM2AK  | 445815 | Leukemia, MESH:D015473     | Arsenic Ar   | 30.33 | 270 |
| CDKN2C   | 1031   | Leukemia, MESH:D015473     | Arsenic Tr   | 30.32 | 265 |
| CEBPD    | 1052   | Leukemia, MESH:D007948     | 2-(2-amin    | 30.32 | 4   |
| DIABLO   | 56616  | Leukemia, MESH:D015473     | alpha-Toc    | 30.32 | 264 |
| FGF2     | 2247   | Leukemia, MESH:D015470     | Arsenic Tr   | 30.32 | 37  |
| UHRF1    | 29128  | Leukemia, MESH:D015473     | Arsenic Tr   | 30.32 | 264 |
| TRP53    | 22059  | Leukemia, MESH:D015473     | Arsenic Ar   | 30.31 | 269 |
| CARHSP1  | 23589  | Leukemia, MESH:D015473     | arsenite Ci  | 30.3  | 159 |
| MFGE8    | 4240   | Leukemia, MESH:D015473     | Arsenic Da   | 30.3  | 162 |

|          |        |                            |              |       |     |
|----------|--------|----------------------------|--------------|-------|-----|
| SMPD1    | 6609   | Leukemia, MESH:D015473     | Arsenic Tr   | 30.3  | 269 |
| LHFPL2   | 10184  | Leukemia, MESH:D015470     | Benzene C    | 30.28 | 26  |
| PLPP1    | 8611   | Leukemia, MESH:D015470     | Arsenic Tr   | 30.28 | 20  |
| SLFN11   | 91607  | Leukemia, MESH:D015470     | Benzene C    | 30.28 | 94  |
| ARID5B   | 84159  | Leukemia, MESH:D015470     | Arsenic Tr   | 30.27 | 25  |
| E2F8     | 79733  | Leukemia, MESH:D015473     | Arsenic Ar   | 30.27 | 271 |
| FANCI    | 55215  | Leukemia, MESH:D015470     | Calcitriol C | 30.27 | 19  |
| IMPDH2   | 3615   | Leukemia, MESH:D015470     | Arsenic Tr   | 30.27 | 30  |
| MERTK    | 10461  | Leukemia, MESH:D015470     | Arsenic Tr   | 30.27 | 95  |
| CD40     | 958    | Leukemia, MESH:D015470     | Arsenic Tr   | 30.26 | 37  |
| ABCG2    | 9429   | Leukemia, MESH:D015473     | Arsenic Tr   | 30.25 | 267 |
| COL6A1   | 1291   | Leukemia, MESH:D015470     | Alitretinoin | 30.22 | 22  |
| LSP1     | 4046   | Leukemia, MESH:D015473     | Arsenic Ar   | 30.22 | 266 |
| RBP4     | 5950   | Leukemia, MESH:D015470     | Decitabine   | 30.22 | 26  |
| TP53INP1 | 94241  | Leukemia, MESH:D015473     | Arsenic Ar   | 30.22 | 265 |
| ATF6     | 22926  | Leukemia, MESH:D015470     | Allopurinol  | 30.2  | 31  |
| MAPK9    | 5601   | Leukemia, MESH:D015473     | alpha-Toc    | 30.19 | 269 |
| HLA-B    | 3106   | Leukemia, MESH:D015470     | Allopurinol  | 30.17 | 31  |
| MX2      | 4600   | Leukemia, MESH:D015470     | Air Polluta  | 30.17 | 33  |
| NFKBIE   | 4794   | Leukemia, MESH:D015470     | Arsenic Tr   | 30.17 | 25  |
| POGLUT1  | 56983  | Leukemia, MESH:D015470     | Air Polluta  | 30.17 | 17  |
| POLD1    | 5424   | Leukemia, MESH:D015470     | Arsenic Tr   | 30.17 | 25  |
| RPS6KA4  | 8986   | Leukemia, MESH:D015470     | Arsenic Tr   | 30.17 | 23  |
| ITGB1    | 3688   | Leukemia, MESH:D015470     | Arsenic Tr   | 30.15 | 31  |
| KIF20A   | 10112  | Leukemia, MESH:D015473     | arsenite C   | 30.15 | 158 |
| VEGFC    | 7424   | Leukemia, MESH:D015473     | Arsenic Ar   | 30.15 | 268 |
| ALPK2    | 115701 | Leukemia, MESH:D015470     | Calcitriol C | 30.14 | 85  |
| B3GNT2   | 10678  | Leukemia, MESH:D015470     | Bortezomi    | 30.14 | 18  |
| EPB41L3  | 23136  | Leukemia, MESH:D015473     | Arsenic Ar   | 30.14 | 160 |
| HIF3A    | 64344  | Leukemia, MESH:D015470     | Clioquinol   | 30.14 | 18  |
| KCNA5    | 3741   | Leukemia, MESH:D015470     | Decitabine   | 30.14 | 28  |
| LBH      | 81606  | Leukemia, MESH:D015473     | arsenite C   | 30.14 | 161 |
| LTBP3    | 4054   | Leukemia, MESH:D015470     | Calcitriol C | 30.14 | 24  |
| ANPEP    | 290    | Leukemia, MESH:D015470     | Air Polluta  | 30.13 | 42  |
| BMF      | 90427  | Leukemia, MESH:D015470     | Arsenic Tr   | 30.13 | 28  |
| COL5A2   | 1290   | Leukemia, MESH:D015470     | Cytarabine   | 30.13 | 96  |
| GLB1     | 2720   | Leukemia, MESH:D015470     | Air Polluta  | 30.13 | 27  |
| STAT6    | 6778   | Leukemia, MESH:D015470     | Calcitriol C | 30.13 | 23  |
| CTH      | 1491   | Leukemia, MESH:D015473     | Arsenic Ar   | 30.12 | 268 |
| HRAS     | 3265   | Leukemia, MESH:D015470     | Arsenic Tr   | 30.1  | 52  |
| ACTA1    | 58     | Leukemia, MESH:D015473     | Arsenic Ar   | 30.09 | 32  |
| GSTO1    | 9446   | Leukemia, MESH:D015473     | Antimony     | 30.09 | 270 |
| ANXA3    | 306    | Leukemia, MESH:D015470     | Arsenic Tr   | 30.07 | 37  |
| ARPC1B   | 10095  | Leukemia, MESH:D015470     | Alitretinoin | 30.07 | 20  |
| GGT1     | 2678   | Leukemia, MESH:D015470     | Arsenic Tr   | 30.07 | 33  |
| PSRC1    | 84722  | Leukemia, MESH:D015470     | Benzene C    | 30.07 | 94  |
| VDAC1    | 7416   | Leukemia, MESH:D015470     | Arsenic Tr   | 30.07 | 45  |
| RASGRP1  | 10125  | Leukemia, MESH:D01marker/m | Benzene C    | 30.06 | 38  |
| GART     | 2618   | Leukemia, MESH:D015473     | Arsenic Ar   | 30.06 | 267 |
| HDAC4    | 9759   | Leukemia, MESH:D015473     | Arsenic Ar   | 30.06 | 266 |
| HSPA2    | 3306   | Leukemia, MESH:D015473     | Arsenic Ar   | 30.03 | 168 |
| APOBEC3I | 9582   | Leukemia, MESH:D015470     | Calcitriol C | 30.01 | 87  |
| CDC42BP1 | 8476   | Leukemia, MESH:D015470     | Arsenic Tr   | 30.01 | 25  |
| IDS      | 3423   | Leukemia, MESH:D015470     | Arsenic Tr   | 30.01 | 23  |
| SGO2     | 151246 | Leukemia, MESH:D015470     | Calcitriol C | 30.01 | 21  |
| IGFBP1   | 3484   | Leukemia, MESH:D015473     | Arsenic Ar   | 29.99 | 267 |
| MOSMO    | 730094 | Leukemia, MESH:D015470     | Calcitriol C | 29.99 | 15  |
| CDC45    | 113130 | Leukemia, MESH:D015473     | Arsenic Ar   | 29.98 | 161 |

|         |        |                        |              |       |     |
|---------|--------|------------------------|--------------|-------|-----|
| ENOSF1  | 55556  | Leukemia, MESH:D015470 | Calcitriol[C | 29.98 | 18  |
| HPGD    | 3248   | Leukemia, MESH:D015473 | Arsenic[Ar   | 29.98 | 269 |
| PLXNA2  | 5362   | Leukemia, MESH:D015473 | Arsenic[ar:  | 29.98 | 161 |
| REPS1   | 85021  | Leukemia, MESH:D015470 | Dexameth     | 29.98 | 21  |
| TRIP10  | 9322   | Leukemia, MESH:D015470 | Dexameth     | 29.98 | 16  |
| SLC22A7 | 10864  | Leukemia, MESH:D015470 | Allopurinc   | 29.97 | 21  |
| COL7A1  | 1294   | Leukemia, MESH:D015470 | Arsenic Tr   | 29.96 | 20  |
| CCNB2   | 9133   | Leukemia, MESH:D015473 | Antimony     | 29.95 | 265 |
| CXCL9   | 4283   | Leukemia, MESH:D015470 | Arsenic Tr   | 29.94 | 36  |
| SLC16A1 | 6566   | Leukemia, MESH:D015470 | Alitretinoi  | 29.94 | 41  |
| TSC22D1 | 8848   | Leukemia, MESH:D015470 | Arsenic Tr   | 29.94 | 45  |
| KAT2B   | 8850   | Leukemia, MESH:D015473 | Arsenic Tr   | 29.9  | 264 |
| LAMC1   | 3915   | Leukemia, MESH:D015473 | Arsenic Tr   | 29.9  | 267 |
| TOP2B   | 7155   | Leukemia, MESH:D015473 | Arsenic[Ar   | 29.9  | 268 |
| ENO3    | 2027   | Leukemia, MESH:D015470 | Cytarabine   | 29.89 | 93  |
| ADGRE5  | 976    | Leukemia, MESH:D015470 | Arsenic Tr   | 29.88 | 22  |
| CSTF3   | 1479   | Leukemia, MESH:D015470 | Air Polluta  | 29.88 | 13  |
| MT1M    | 4499   | Leukemia, MESH:D015470 | Arsenic Tr   | 29.88 | 25  |
| OSBPL6  | 114880 | Leukemia, MESH:D015470 | Arsenic Tr   | 29.88 | 29  |
| APOB    | 338    | Leukemia, MESH:D015470 | Allopurinc   | 29.87 | 63  |
| HSP90B1 | 7184   | Leukemia, MESH:D015470 | Arsenic Tr   | 29.87 | 37  |
| ORM1    | 5004   | Leukemia, MESH:D015473 | alpha-Toc    | 29.87 | 158 |
| CXCL2   | 2920   | Leukemia, MESH:D015473 | alpha-Toc    | 29.86 | 165 |
| ELOVL2  | 54898  | Leukemia, MESH:D015470 | Arsenic Tr   | 29.86 | 31  |
| LRRFIP1 | 9208   | Leukemia, MESH:D015470 | Arsenic Tr   | 29.86 | 27  |
| TIA1    | 7072   | Leukemia, MESH:D015470 | Decitabine   | 29.86 | 33  |
| DUSP2   | 1844   | Leukemia, MESH:D015473 | Antimony     | 29.82 | 261 |
| ENO1    | 2023   | Leukemia, MESH:D015473 | Arsenic[ar:  | 29.82 | 162 |
| BMP7    | 655    | Leukemia, MESH:D015470 | Calcitriol[C | 29.81 | 35  |
| BTG1    | 694    | Leukemia, MESH:D015473 | arsenic dis  | 29.81 | 266 |
| DCN     | 1634   | Leukemia, MESH:D015473 | Arsenic Tr   | 29.81 | 266 |
| ITGB4   | 3691   | Leukemia, MESH:D015470 | Arsenic Tr   | 29.81 | 27  |
| CCDC28B | 79140  | Leukemia, MESH:D015470 | Arsenic Tr   | 29.8  | 28  |
| CSRNP2  | 81566  | Leukemia, MESH:D015470 | Benzene[C    | 29.8  | 40  |
| PHF2    | 5253   | Leukemia, MESH:D015470 | Air Polluta  | 29.8  | 17  |
| MAPK8   | 5599   | Leukemia, MESH:D015473 | alpha-Toc    | 29.77 | 270 |
| SPP1    | 6696   | Leukemia, MESH:D015473 | Arsenic Tr   | 29.77 | 270 |
| AK3     | 50808  | Leukemia, MESH:D015470 | Dexameth     | 29.76 | 23  |
| BDKRB1  | 623    | Leukemia, MESH:D015470 | Calcitriol[C | 29.76 | 23  |
| LSP1    | 4046   | Leukemia, MESH:D015470 | Arsenic Tr   | 29.76 | 28  |
| MAL     | 4118   | Leukemia, MESH:D015470 | Decitabine   | 29.76 | 24  |
| SPON1   | 10418  | Leukemia, MESH:D015470 | Arsenic Tr   | 29.76 | 92  |
| ARID2   | 196528 | Leukemia, MESH:D015470 | Benzene[C    | 29.75 | 34  |
| NFKB2   | 4791   | Leukemia, MESH:D015473 | Antimony     | 29.75 | 261 |
| PELO    | 53918  | Leukemia, MESH:D015470 | Benzene[C    | 29.75 | 39  |
| PRELP   | 5549   | Leukemia, MESH:D015470 | Arsenic Tr   | 29.75 | 27  |
| EFNA5   | 1946   | Leukemia, MESH:D015470 | Calcitriol[C | 29.74 | 24  |
| HACD4   | 401494 | Leukemia, MESH:D015470 | Arsenic Tr   | 29.74 | 22  |
| MIR21   | 406991 | Leukemia, MESH:D015470 | Air Polluta  | 29.74 | 54  |
| NMU     | 10874  | Leukemia, MESH:D015470 | Calcitriol[C | 29.74 | 81  |
| PARPBP  | 55010  | Leukemia, MESH:D015470 | Calcitriol[C | 29.74 | 16  |
| PLEKHA2 | 59339  | Leukemia, MESH:D015470 | Calcitriol[C | 29.74 | 26  |
| RPL6    | 6128   | Leukemia, MESH:D015473 | Arsenic Tr   | 29.74 | 264 |
| SPTAN1  | 6709   | Leukemia, MESH:D015470 | Arsenic Tr   | 29.74 | 34  |
| VCL     | 7414   | Leukemia, MESH:D015470 | Dexameth     | 29.74 | 23  |
| FPR1    | 2357   | Leukemia, MESH:D015473 | Arsenic[Ar   | 29.73 | 264 |
| ZNF189  | 7743   | Leukemia, MESH:D015470 | Azacitidine  | 29.72 | 20  |
| PIM1    | 5292   | Leukemia, MESH:D015473 | arsenic dis  | 29.7  | 266 |

|          |        |                        |              |       |     |
|----------|--------|------------------------|--------------|-------|-----|
| CD86     | 942    | Leukemia, MESH:D015470 | Alitretinoi  | 29.68 | 54  |
| CHAC1    | 79094  | Leukemia, MESH:D015470 | Arsenic Tr   | 29.68 | 29  |
| ATG12    | 9140   | Leukemia, MESH:D015470 | Arsenic Tr   | 29.67 | 28  |
| CBLB     | 868    | Leukemia, MESH:D015470 | Benzene C    | 29.67 | 33  |
| PFKFB4   | 5210   | Leukemia, MESH:D015470 | Arsenic Tr   | 29.67 | 33  |
| PYGM     | 5837   | Leukemia, MESH:D015473 | alvocidib a  | 29.67 | 24  |
| TRAF1    | 7185   | Leukemia, MESH:D015473 | Arsenic Tr   | 29.67 | 263 |
| AREG     | 374    | Leukemia, MESH:D015473 | Arsenic ar   | 29.65 | 161 |
| GATA3    | 2625   | Leukemia, MESH:D015473 | Arsenic Ar   | 29.64 | 267 |
| CASZ1    | 54897  | Leukemia, MESH:D015470 | Calcitriol C | 29.62 | 25  |
| EIF4EBP2 | 1979   | Leukemia, MESH:D015470 | Alitretinoi  | 29.62 | 17  |
| ELF1     | 1997   | Leukemia, MESH:D015470 | Arsenic Tr   | 29.62 | 20  |
| FBXW7    | 55294  | Leukemia, MESH:D015470 | Arsenic Tr   | 29.62 | 20  |
| FMNL2    | 114793 | Leukemia, MESH:D015470 | Dexameth     | 29.62 | 19  |
| HOOK1    | 51361  | Leukemia, MESH:D015470 | Calcitriol C | 29.62 | 19  |
| LZTS2    | 84445  | Leukemia, MESH:D015470 | Dexameth     | 29.62 | 14  |
| OSBPL10  | 114884 | Leukemia, MESH:D015470 | Cytarabine   | 29.62 | 89  |
| PCDH20   | 64881  | Leukemia, MESH:D015470 | Arsenic Tr   | 29.62 | 88  |
| PRPH     | 5630   | Leukemia, MESH:D015470 | Cytarabine   | 29.62 | 92  |
| TFAP4    | 7023   | Leukemia, MESH:D015470 | Calcitriol C | 29.62 | 14  |
| CDK6     | 1021   | Leukemia, MESH:D015473 | Arsenic Ar   | 29.61 | 266 |
| MEGF6    | 1953   | Leukemia, MESH:D015473 | Arsenic Ar   | 29.61 | 266 |
| CD69     | 969    | Leukemia, MESH:D015473 | Arsenic ar   | 29.59 | 165 |
| PYGL     | 5836   | Leukemia, MESH:D015470 | alvocidib /  | 29.58 | 27  |
| TNFRSF9  | 3604   | Leukemia, MESH:D015470 | Arsenic Tr   | 29.58 | 31  |
| ZEB2     | 9839   | Leukemia, MESH:D015470 | Air Polluta  | 29.58 | 25  |
| BARD1    | 580    | Leukemia, MESH:D015470 | Bortezomi    | 29.57 | 48  |
| GART     | 2618   | Leukemia, MESH:D015470 | Air Polluta  | 29.57 | 22  |
| KNL1     | 57082  | Leukemia, MESH:D015470 | Calcitriol C | 29.57 | 22  |
| MAP3K6   | 9064   | Leukemia, MESH:D015470 | Decitabine   | 29.57 | 26  |
| PLEC     | 5339   | Leukemia, MESH:D015470 | Decitabine   | 29.57 | 27  |
| XPO1     | 7514   | Leukemia, MESH:D015470 | Air Polluta  | 29.57 | 24  |
| GSTM3    | 2947   | Leukemia, MESH:D015470 | Allopurinc   | 29.54 | 35  |
| JUNB     | 3726   | Leukemia, MESH:D015470 | Arsenic Tr   | 29.54 | 35  |
| ENPP2    | 5168   | Leukemia, MESH:D015473 | Arsenic Ar   | 29.53 | 265 |
| AK4      | 205    | Leukemia, MESH:D015470 | Benzene C    | 29.5  | 40  |
| SPTBN1   | 6711   | Leukemia, MESH:D015470 | Arsenic Tr   | 29.5  | 46  |
| POLR1B   | 84172  | Leukemia, MESH:D015470 | Air Polluta  | 29.49 | 21  |
| RBM25    | 58517  | Leukemia, MESH:D015470 | Dexameth     | 29.49 | 20  |
| TLE1     | 7088   | Leukemia, MESH:D015470 | Decitabine   | 29.49 | 26  |
| LMNB1    | 4001   | Leukemia, MESH:D015473 | arsenite Ci  | 29.48 | 163 |
| DSC2     | 1824   | Leukemia, MESH:D015470 | Arsenic Tr   | 29.47 | 91  |
| PLXNA2   | 5362   | Leukemia, MESH:D015470 | Calcitriol C | 29.47 | 22  |
| SPON2    | 10417  | Leukemia, MESH:D015470 | Air Polluta  | 29.47 | 29  |
| ATP5IF1  | 93974  | Leukemia, MESH:D015470 | Arsenic Tr   | 29.46 | 28  |
| ESR1     | 2099   | Leukemia, MESH:D015473 | alpha-Toc    | 29.46 | 278 |
| NBPF1    | 55672  | Leukemia, MESH:D015470 | Air Polluta  | 29.46 | 12  |
| AP3S1    | 1176   | Leukemia, MESH:D015470 | Arsenic Tr   | 29.44 | 19  |
| FAM214B  | 80256  | Leukemia, MESH:D015470 | Calcitriol C | 29.44 | 16  |
| GOLGA8A  | 23015  | Leukemia, MESH:D015470 | Dexameth     | 29.44 | 19  |
| H3-4     | 8290   | Leukemia, MESH:D015470 | Alitretinoi  | 29.44 | 27  |
| SLC5A12  | 159963 | Leukemia, MESH:D015470 | Arsenic Tr   | 29.44 | 87  |
| SMC4     | 10051  | Leukemia, MESH:D015473 | Arsenic Tr   | 29.44 | 266 |
| TMEM62   | 80021  | Leukemia, MESH:D015470 | Cytarabine   | 29.44 | 79  |
| ATF2     | 1386   | Leukemia, MESH:D015473 | alpha-Toc    | 29.43 | 265 |
| BAD      | 572    | Leukemia, MESH:D015473 | alpha-Toc    | 29.42 | 265 |
| DHFR     | 1719   | Leukemia, MESH:D015470 | Cytarabine   | 29.42 | 90  |
| CPT1A    | 1374   | Leukemia, MESH:D015473 | alpha-Toc    | 29.39 | 267 |

|          |        |                            |              |       |     |
|----------|--------|----------------------------|--------------|-------|-----|
| PLAUR    | 5329   | Leukemia, MESH:D015470     | Arsenic Tr   | 29.39 | 43  |
| ASPH     | 444    | Leukemia, MESH:D015470     | Arsenic Tr   | 29.38 | 24  |
| PRDM1    | 639    | Leukemia, MESH:D015470     | Decitabine   | 29.38 | 22  |
| SORBS1   | 10580  | Leukemia, MESH:D015470     | Decitabine   | 29.38 | 41  |
| TOP2B    | 7155   | Leukemia, MESH:D015470     | Amsacrine    | 29.38 | 36  |
| KIF15    | 56992  | Leukemia, MESH:D015473     | Arsenic ar   | 29.37 | 163 |
| SLC7A2   | 6542   | Leukemia, MESH:D015473     | Arsenic ar   | 29.37 | 164 |
| CD3D     | 915    | Leukemia, MESH:D015470     | Benzene C    | 29.36 | 28  |
| FOXC2    | 2303   | Leukemia, MESH:D015470     | Decitabine   | 29.36 | 24  |
| MAP7     | 9053   | Leukemia, MESH:D015470     | Arsenic Tr   | 29.36 | 34  |
| MMP16    | 4325   | Leukemia, MESH:D015470     | Arsenic Tr   | 29.36 | 27  |
| MPZL2    | 10205  | Leukemia, MESH:D015470     | Decitabine   | 29.36 | 20  |
| PITPNC1  | 26207  | Leukemia, MESH:D015470     | Arsenic Tr   | 29.36 | 25  |
| SLC43A1  | 8501   | Leukemia, MESH:D015470     | Arsenic Tr   | 29.36 | 22  |
| SLCO4C1  | 353189 | Leukemia, MESH:D015470     | Air Polluta  | 29.36 | 21  |
| PDGFA    | 5154   | Leukemia, MESH:D015470     | Arsenic Tr   | 29.3  | 48  |
| BBC3     | 27113  | Leukemia, MESH:D015473     | Arsenic Ar   | 29.29 | 269 |
| CRISPLD2 | 83716  | Leukemia, MESH:D015473     | Arsenic Ca   | 29.29 | 162 |
| MYBL2    | 4605   | Leukemia, MESH:D015473     | Calcitriol E | 29.29 | 156 |
| BGN      | 633    | Leukemia, MESH:D015470     | Dasatinib I  | 29.28 | 25  |
| BSG      | 682    | Leukemia, MESH:D015470     | Arsenic Tr   | 29.28 | 40  |
| CD40LG   | 959    | Leukemia, MESH:D015470     | Arsenic Tr   | 29.28 | 33  |
| RFC2     | 5982   | Leukemia, MESH:D015473     | Antimony     | 29.28 | 265 |
| SLCO2A1  | 6578   | Leukemia, MESH:D015470     | Decitabine   | 29.28 | 24  |
| TRIM2    | 23321  | Leukemia, MESH:D015470     | Air Polluta  | 29.28 | 36  |
| ABCA7    | 10347  | Leukemia, MESH:D015470     | Docetaxel    | 29.27 | 15  |
| ABI2     | 10152  | Leukemia, MESH:D015470     | Arsenic Tr   | 29.27 | 17  |
| AXL      | 558    | Leukemia, MESH:D015470     | Cyclophos    | 29.27 | 95  |
| FOXF2    | 2295   | Leukemia, MESH:D015470     | Calcitriol E | 29.27 | 27  |
| GDF11    | 10220  | Leukemia, MESH:D015470     | Decitabine   | 29.27 | 22  |
| RAP2A    | 5911   | Leukemia, MESH:D015470     | Androgen     | 29.27 | 19  |
| TAOK2    | 9344   | Leukemia, MESH:D015470     | Air Polluta  | 29.27 | 17  |
| SCD      | 6319   | Leukemia, MESH:D015473     | Antimony     | 29.25 | 162 |
| BDNF     | 627    | Leukemia, MESH:D015473     | alpha-Toc    | 29.24 | 272 |
| PFAS     | 5198   | Leukemia, MESH:D015470     | Arsenic Tr   | 29.24 | 33  |
| SLC1A2   | 6506   | Leukemia, MESH:D015470     | Arsenic Tr   | 29.24 | 32  |
| TIPIN    | 54962  | Leukemia, MESH:D015470     | Dasatinib I  | 29.24 | 22  |
| COL6A3   | 1293   | Leukemia, MESH:D015473     | Arsenic Ar   | 29.22 | 269 |
| PTPRC    | 5788   | Leukemia, MESH:D015473     | Arsenic Tr   | 29.22 | 267 |
| TLR4     | 7099   | Leukemia, MESH:D015473     | Arsenic Ar   | 29.21 | 271 |
| BCL3     | 602    | Leukemia, MESH:D015470     | Air Polluta  | 29.2  | 27  |
| ANXA6    | 309    | Leukemia, MESH:D01marker/m | Cytarabine   | 29.19 | 91  |
| LEP      | 3952   | Leukemia, MESH:D01marker/m | Arsenic Ar   | 29.19 | 267 |
| EIF4G1   | 1981   | Leukemia, MESH:D015470     | Arsenic Tr   | 29.19 | 31  |
| IFIH1    | 64135  | Leukemia, MESH:D015470     | Arsenic Tr   | 29.19 | 28  |
| NCAPG    | 64151  | Leukemia, MESH:D015470     | Calcitriol E | 29.19 | 20  |
| FOSB     | 2354   | Leukemia, MESH:D015470     | Air Polluta  | 29.18 | 35  |
| ALPK2    | 115701 | Leukemia, MESH:D015473     | Calcitriol C | 29.17 | 158 |
| GNAL     | 2774   | Leukemia, MESH:D015473     | Arsenic Ar   | 29.17 | 265 |
| HOXA5    | 3202   | Leukemia, MESH:D015473     | Arsenic Tr   | 29.17 | 266 |
| INS1     | 16333  | Leukemia, MESH:D015470     | 15-deoxy-    | 29.17 | 29  |
| PPP1R15A | 23645  | Leukemia, MESH:D015473     | Arsenic Tr   | 29.17 | 268 |
| LHB      | 3972   | Leukemia, MESH:D015470     | 2-(2-chlor   | 29.14 | 33  |
| CYP3A5   | 1577   | Leukemia, MESH:D015470     | 2-(2-chlor   | 29.13 | 33  |
| TNNT2    | 7139   | Leukemia, MESH:D015470     | Arsenic Tr   | 29.13 | 105 |
| RGS10    | 6001   | Leukemia, MESH:D015470     | Decitabine   | 29.12 | 23  |
| ZFAND5   | 7763   | Leukemia, MESH:D015470     | Arsenic Tr   | 29.12 | 37  |
| AAMDC    | 28971  | Leukemia, MESH:D015470     | Dexameth     | 29.1  | 19  |

|          |        |                        |              |       |     |
|----------|--------|------------------------|--------------|-------|-----|
| AMFR     | 267    | Leukemia, MESH:D015470 | Arsenic Tr   | 29.1  | 22  |
| IFT74    | 80173  | Leukemia, MESH:D015470 | Decitabine   | 29.1  | 22  |
| TOR1AIP1 | 26092  | Leukemia, MESH:D015470 | Bortezomi    | 29.1  | 17  |
| DDB2     | 1643   | Leukemia, MESH:D015470 | Arsenic Tr   | 29.09 | 27  |
| EIF1     | 10209  | Leukemia, MESH:D015470 | Benzene B    | 29.09 | 35  |
| MT1G     | 4495   | Leukemia, MESH:D015470 | Arsenic Tr   | 29.09 | 42  |
| NASP     | 4678   | Leukemia, MESH:D015470 | Arsenic Tr   | 29.09 | 29  |
| SHMT1    | 6470   | Leukemia, MESH:D015470 | Arsenic Tr   | 29.09 | 23  |
| EIF2A    | 83939  | Leukemia, MESH:D015473 | 2-(2-chlor   | 29.08 | 271 |
| APOBEC3I | 9582   | Leukemia, MESH:D015473 | arsenite C   | 29.06 | 160 |
| GGT1     | 2678   | Leukemia, MESH:D015473 | Antimony     | 29.06 | 270 |
| HOXB9    | 3219   | Leukemia, MESH:D015473 | Arsenic Ar   | 29.06 | 264 |
| PLEKHA5  | 54477  | Leukemia, MESH:D015473 | Arsenic ar   | 29.06 | 160 |
| SOD3     | 6649   | Leukemia, MESH:D015473 | Arsenic Tr   | 29.06 | 268 |
| XPOT     | 11260  | Leukemia, MESH:D015473 | Arsenic Tr   | 29.06 | 267 |
| ITGB2    | 3689   | Leukemia, MESH:D015470 | Alitretinoi  | 29.05 | 39  |
| PHLDA1   | 22822  | Leukemia, MESH:D015470 | Air Polluta  | 29.05 | 31  |
| PSAT1    | 29968  | Leukemia, MESH:D015470 | Arsenic Tr   | 29.05 | 26  |
| CAPG     | 822    | Leukemia, MESH:D015473 | Arsenic Ar   | 29.01 | 269 |
| HDAC1    | 3065   | Leukemia, MESH:D015473 | arsenic dis  | 29.01 | 264 |
| PGK1     | 5230   | Leukemia, MESH:D015473 | alpha-Toc    | 29.01 | 268 |
| TGM1     | 7051   | Leukemia, MESH:D015473 | Antimony     | 29.01 | 165 |
| WARS1    | 7453   | Leukemia, MESH:D015473 | Arsenic Tr   | 29.01 | 269 |
| ALDH1L2  | 160428 | Leukemia, MESH:D015470 | Dasatinib    | 29    | 19  |
| CDK5R1   | 8851   | Leukemia, MESH:D015470 | Arsenic Tr   | 29    | 90  |
| COL13A1  | 1305   | Leukemia, MESH:D015470 | Calcitriol C | 29    | 89  |
| DHRS2    | 10202  | Leukemia, MESH:D015470 | Arsenic Tr   | 29    | 32  |
| EFNB1    | 1947   | Leukemia, MESH:D015470 | Dexameth     | 29    | 19  |
| EML4     | 27436  | Leukemia, MESH:D015470 | Arsenic Tr   | 29    | 36  |
| EPHA4    | 2043   | Leukemia, MESH:D015470 | Air Polluta  | 29    | 19  |
| GPC4     | 2239   | Leukemia, MESH:D015470 | Arsenic Tr   | 29    | 29  |
| GPSM2    | 29899  | Leukemia, MESH:D015470 | Calcitriol C | 29    | 27  |
| NOLC1    | 9221   | Leukemia, MESH:D015470 | Air Polluta  | 29    | 26  |
| PLSCR1   | 5359   | Leukemia, MESH:D015470 | Air Polluta  | 29    | 26  |
| RAD18    | 56852  | Leukemia, MESH:D015470 | Calcitriol C | 29    | 18  |
| SEMA3A   | 10371  | Leukemia, MESH:D015470 | Arsenic Tr   | 29    | 27  |
| VTN      | 7448   | Leukemia, MESH:D015470 | Decitabine   | 29    | 25  |
| PDIA4    | 9601   | Leukemia, MESH:D015470 | Carboplati   | 28.98 | 22  |
| SLC27A2  | 11001  | Leukemia, MESH:D015470 | Arsenic Tr   | 28.98 | 25  |
| ABCB4    | 5244   | Leukemia, MESH:D015473 | Arsenic Tr   | 28.97 | 264 |
| ASS1     | 445    | Leukemia, MESH:D015473 | Arsenic Tr   | 28.96 | 266 |
| WNT16    | 51384  | Leukemia, MESH:D015470 | Arsenic Tr   | 28.95 | 24  |
| CDC45    | 8318   | Leukemia, MESH:D015473 | Arsenic Tr   | 28.94 | 264 |
| DOK4     | 55715  | Leukemia, MESH:D015470 | Calcitriol C | 28.94 | 91  |
| GTF2A1   | 2957   | Leukemia, MESH:D015470 | Arsenic Tr   | 28.94 | 17  |
| HIPK1    | 204851 | Leukemia, MESH:D015470 | Arsenic Tr   | 28.94 | 22  |
| SETD1B   | 23067  | Leukemia, MESH:D015470 | Bortezomi    | 28.94 | 16  |
| VSIR     | 64115  | Leukemia, MESH:D015470 | Decitabine   | 28.94 | 23  |
| FGF1     | 2246   | Leukemia, MESH:D015470 | Alitretinoi  | 28.93 | 28  |
| JUND     | 3727   | Leukemia, MESH:D015470 | Air Polluta  | 28.93 | 28  |
| CDH13    | 1012   | Leukemia, MESH:D015470 | Androgen     | 28.91 | 50  |
| ENC1     | 8507   | Leukemia, MESH:D015473 | Arsenic Tr   | 28.91 | 265 |
| ICAM1    | 3383   | Leukemia, MESH:D015473 | alpha-Toc    | 28.91 | 273 |
| IRAK2    | 3656   | Leukemia, MESH:D015470 | Air Polluta  | 28.91 | 24  |
| S100A11  | 6282   | Leukemia, MESH:D015470 | Air Polluta  | 28.91 | 32  |
| STIP1    | 10963  | Leukemia, MESH:D015470 | Air Polluta  | 28.91 | 36  |
| VWF      | 7450   | Leukemia, MESH:D015470 | Arsenic Tr   | 28.91 | 50  |
| ACTB     | 60     | Leukemia, MESH:D015473 | Arsenic Ar   | 28.89 | 268 |

|         |        |                            |                        |       |     |
|---------|--------|----------------------------|------------------------|-------|-----|
| AKR1C3  | 8644   | Leukemia, MESH:D015473     | Antimony               | 28.89 | 270 |
| ANGPTL2 | 23452  | Leukemia, MESH:D015470     | Cytarabine             | 28.88 | 82  |
| CRABP1  | 1381   | Leukemia, MESH:D015470     | Alitretinoin           | 28.88 | 90  |
| FAM107A | 11170  | Leukemia, MESH:D015470     | Decitabine             | 28.88 | 24  |
| GDF10   | 2662   | Leukemia, MESH:D015470     | Decitabine             | 28.88 | 22  |
| NUDT1   | 4521   | Leukemia, MESH:D015470     | Benzene C              | 28.88 | 29  |
| PTPN13  | 5783   | Leukemia, MESH:D015470     | Doxorubicin            | 28.88 | 20  |
| SERINC2 | 347735 | Leukemia, MESH:D015470     | Calcitriol E           | 28.88 | 13  |
| EIF2S1  | 1965   | Leukemia, MESH:D015470     | Arsenic Tr             | 28.87 | 38  |
| BCR     | 613    | Leukemia, MESH:D015473     | arsenic dis            | 28.86 | 262 |
| PARPBP  | 55010  | Leukemia, MESH:D015473     | arsenite Ci            | 28.85 | 158 |
| PTPN21  | 11099  | Leukemia, MESH:D015473     | Arsenic Tr             | 28.85 | 158 |
| FHL2    | 2274   | Leukemia, MESH:D01marker/m | Arsenic Tr             | 28.83 | 41  |
| MMP7    | 4316   | Leukemia, MESH:D015470     | Arsenic Tr             | 28.83 | 28  |
| SLC30A1 | 7779   | Leukemia, MESH:D015470     | Arsenic Tr             | 28.83 | 30  |
| SULT1A1 | 6817   | Leukemia, MESH:D015470     | Arsenic Tr             | 28.83 | 45  |
| CKS1B   | 1163   | Leukemia, MESH:D015470     | Calcitriol E           | 28.82 | 27  |
| MAP4K4  | 9448   | Leukemia, MESH:D015470     | Bortezomib             | 28.82 | 25  |
| NIBAN1  | 116496 | Leukemia, MESH:D015470     | Arsenic Tr             | 28.82 | 33  |
| PROCR   | 10544  | Leukemia, MESH:D015470     | Cyclophosphamide       | 28.82 | 36  |
| SMC4    | 10051  | Leukemia, MESH:D015470     | Arsenic Tr             | 28.82 | 41  |
| GRB10   | 2887   | Leukemia, MESH:D015473     | Arsenic Ar             | 28.8  | 267 |
| LTF     | 4057   | Leukemia, MESH:D015473     | Arsenic ars            | 28.8  | 159 |
| MCM10   | 55388  | Leukemia, MESH:D015473     | arsenite Ci            | 28.8  | 157 |
| POSTN   | 10631  | Leukemia, MESH:D015473     | Arsenic Tr             | 28.8  | 264 |
| TIMP1   | 7076   | Leukemia, MESH:D015473     | Arsenic Tr             | 28.8  | 273 |
| TRIP13  | 9319   | Leukemia, MESH:D015473     | Arsenic Tr             | 28.8  | 264 |
| BCL2L12 | 83596  | Leukemia, MESH:D015473     | Arsenic Ar             | 28.79 | 161 |
| FYB1    | 2533   | Leukemia, MESH:D015473     | Arsenic Ar             | 28.79 | 267 |
| NEMP1   | 23306  | Leukemia, MESH:D015473     | arsenite Ci            | 28.79 | 161 |
| NOS2A   | 404036 | Leukemia, MESH:D015473     | Arsenic Tr             | 28.79 | 263 |
| RPS6    | 6194   | Leukemia, MESH:D015470     | Arsenic Tr             | 28.77 | 31  |
| SPATA7  | 55812  | Leukemia, MESH:D015470     | Cytarabine             | 28.77 | 90  |
| UBE2W   | 55284  | Leukemia, MESH:D015470     | Dexamethasone          | 28.77 | 19  |
| ALDH3A1 | 218    | Leukemia, MESH:D015470     | Arsenic Tr             | 28.76 | 42  |
| ALOX12  | 239    | Leukemia, MESH:D015470     | Benzene E              | 28.76 | 33  |
| CD4     | 920    | Leukemia, MESH:D015470     | Benzene C              | 28.76 | 38  |
| CKS2    | 1164   | Leukemia, MESH:D015470     | Calcitriol C           | 28.76 | 83  |
| CTBP2   | 1488   | Leukemia, MESH:D015470     | Air Pollutants         | 28.76 | 18  |
| FERMT1  | 55612  | Leukemia, MESH:D015470     | Arsenic Tr             | 28.76 | 28  |
| RAB8B   | 51762  | Leukemia, MESH:D015470     | Benzene E              | 28.76 | 36  |
| RASD1   | 51655  | Leukemia, MESH:D015470     | Calcitriol E           | 28.76 | 21  |
| BTF3    | 689    | Leukemia, MESH:D015473     | Antimony               | 28.75 | 267 |
| CEACAM1 | 634    | Leukemia, MESH:D015473     | Calcitriol E           | 28.73 | 160 |
| KIF15   | 56992  | Leukemia, MESH:D015470     | Calcitriol C           | 28.73 | 89  |
| THBS2   | 7058   | Leukemia, MESH:D015470     | Calcitriol E           | 28.73 | 18  |
| SENP3   | 26168  | Leukemia, MESH:D015470     | Azacitidine            | 28.71 | 16  |
| ZNF22   | 7570   | Leukemia, MESH:D015470     | Decitabine             | 28.71 | 21  |
| CDH2    | 1000   | Leukemia, MESH:D015473     | 2-(2-chloroethyl)amine | 28.7  | 268 |
| BRAF    | 673    | Leukemia, MESH:D015470     | ABT-737 A              | 28.69 | 23  |
| NEDD9   | 4739   | Leukemia, MESH:D015470     | Alitretinoin           | 28.69 | 41  |
| CYBB    | 1536   | Leukemia, MESH:D015473     | Arsenic Ar             | 28.66 | 273 |
| ITPR3   | 3710   | Leukemia, MESH:D015473     | Arsenic Tr             | 28.66 | 267 |
| PDK1    | 5163   | Leukemia, MESH:D015473     | Arsenic Tr             | 28.66 | 264 |
| TMEM97  | 27346  | Leukemia, MESH:D015473     | Arsenic Tr             | 28.66 | 261 |
| FGF8    | 2253   | Leukemia, MESH:D015470     | Androgen               | 28.65 | 17  |
| H2BC5   | 3017   | Leukemia, MESH:D015473     | Arsenic Tr             | 28.65 | 263 |
| KIF1A   | 547    | Leukemia, MESH:D015470     | Daunorubicin           | 28.65 | 49  |

|          |        |                            |              |       |     |
|----------|--------|----------------------------|--------------|-------|-----|
| NKX3-1   | 4824   | Leukemia, MESH:D015470     | Alitretinoi  | 28.65 | 25  |
| PARP9    | 83666  | Leukemia, MESH:D015470     | Air Polluta  | 28.65 | 20  |
| TJP3     | 27134  | Leukemia, MESH:D015470     | Calcitriol C | 28.65 | 21  |
| TNNT1    | 7138   | Leukemia, MESH:D015473     | arsenite ca  | 28.65 | 161 |
| ASF1B    | 55723  | Leukemia, MESH:D015470     | Calcitriol C | 28.64 | 22  |
| CCL3     | 6348   | Leukemia, MESH:D015473     | Arsenic ar:  | 28.64 | 266 |
| LTBP1    | 4052   | Leukemia, MESH:D015470     | Benzene C    | 28.64 | 39  |
| SAMD4A   | 23034  | Leukemia, MESH:D015470     | Dexameth     | 28.64 | 20  |
| SH3PXD2/ | 9644   | Leukemia, MESH:D015470     | Calcitriol C | 28.64 | 18  |
| TPM1     | 7168   | Leukemia, MESH:D015470     | Bortezomi    | 28.64 | 31  |
| CD80     | 941    | Leukemia, MESH:D015470     | Alitretinoi  | 28.62 | 31  |
| CLDN4    | 1364   | Leukemia, MESH:D015470     | Arsenic Tr   | 28.62 | 27  |
| EHBP1L1  | 254102 | Leukemia, MESH:D015470     | Calcitriol C | 28.62 | 21  |
| FRK      | 2444   | Leukemia, MESH:D015470     | Arsenic Tr   | 28.62 | 22  |
| PTX3     | 5806   | Leukemia, MESH:D015470     | Arsenic Tr   | 28.62 | 39  |
| TOR1B    | 27348  | Leukemia, MESH:D015470     | Air Polluta  | 28.62 | 26  |
| CLPP     | 8192   | Leukemia, MESH:D015470     | Dexameth     | 28.61 | 16  |
| GLOD4    | 51031  | Leukemia, MESH:D015470     | Cyclophos    | 28.61 | 16  |
| HNRNPLL  | 92906  | Leukemia, MESH:D015470     | Benzene B    | 28.61 | 28  |
| IK       | 3550   | Leukemia, MESH:D015470     | Arsenic Tr   | 28.61 | 23  |
| KSR1     | 8844   | Leukemia, MESH:D015470     | Benzene C    | 28.61 | 33  |
| PLK1     | 5347   | Leukemia, MESH:D015473     | Arsenic Tr   | 28.61 | 264 |
| S100A4   | 6275   | Leukemia, MESH:D015473     | Arsenic Tr   | 28.61 | 270 |
| SALL2    | 6297   | Leukemia, MESH:D015470     | Dexameth     | 28.61 | 25  |
| AQP9     | 366    | Leukemia, MESH:D01marker/m | Arsenic Ar   | 28.59 | 267 |
| REL      | 5966   | Leukemia, MESH:D015473     | Arsenic Ar   | 28.59 | 265 |
| MDM2     | 4193   | Leukemia, MESH:D015473     | alvocidib /  | 28.58 | 170 |
| IRF1     | 3659   | Leukemia, MESH:D015473     | Arsenic Ar   | 28.56 | 270 |
| ACAT1    | 38     | Leukemia, MESH:D015470     | Arsenic Tr   | 28.55 | 27  |
| FGF12    | 2257   | Leukemia, MESH:D015473     | Arsenic Ar   | 28.55 | 265 |
| FKBP1A   | 2280   | Leukemia, MESH:D015470     | Benzene B    | 28.55 | 33  |
| IL13     | 3596   | Leukemia, MESH:D015473     | Arsenic Ar   | 28.55 | 265 |
| MMP16    | 4325   | Leukemia, MESH:D015473     | Arsenic Ar   | 28.55 | 263 |
| PAICS    | 10606  | Leukemia, MESH:D015470     | Air Polluta  | 28.55 | 25  |
| PTPRC    | 5788   | Leukemia, MESH:D015470     | Arsenic Tr   | 28.55 | 36  |
| COL5A3   | 50509  | Leukemia, MESH:D015470     | Dexameth     | 28.53 | 22  |
| FAM20C   | 56975  | Leukemia, MESH:D015470     | Arsenic Tr   | 28.53 | 30  |
| HNRNPL   | 3191   | Leukemia, MESH:D015470     | Arsenic Tr   | 28.53 | 25  |
| LGALS8   | 3964   | Leukemia, MESH:D015470     | Arsenic Tr   | 28.53 | 36  |
| MEOX1    | 4222   | Leukemia, MESH:D015470     | Air Polluta  | 28.53 | 22  |
| NR5A2    | 2494   | Leukemia, MESH:D015473     | Arsenic ar:  | 28.52 | 159 |
| PPIA     | 5478   | Leukemia, MESH:D015473     | alpha-Toc    | 28.52 | 264 |
| RACGAP1  | 29127  | Leukemia, MESH:D015473     | Arsenic Tr   | 28.52 | 264 |
| NAF1     | 92345  | Leukemia, MESH:D015470     | Bortezomi    | 28.48 | 12  |
| UBXN6    | 80700  | Leukemia, MESH:D015470     | Decitabine   | 28.48 | 21  |
| WDR59    | 79726  | Leukemia, MESH:D015470     | Dexameth     | 28.48 | 12  |
| CXCL11   | 6373   | Leukemia, MESH:D015470     | Calcitriol C | 28.47 | 17  |
| FCGR2B   | 2213   | Leukemia, MESH:D015470     | Dexameth     | 28.47 | 23  |
| GLO1     | 2739   | Leukemia, MESH:D015470     | Arsenic Tr   | 28.47 | 25  |
| KCNMA1   | 3778   | Leukemia, MESH:D015470     | Arsenic Tr   | 28.47 | 20  |
| AFTPH    | 54812  | Leukemia, MESH:D015470     | Arsenic Tr   | 28.46 | 22  |
| AHI1     | 54806  | Leukemia, MESH:D015470     | Cytarabine   | 28.46 | 86  |
| ANKFY1   | 51479  | Leukemia, MESH:D015470     | Benzene C    | 28.46 | 30  |
| APBB1    | 322    | Leukemia, MESH:D015470     | Arsenic Tr   | 28.46 | 24  |
| BCAP31   | 10134  | Leukemia, MESH:D015470     | Dexameth     | 28.46 | 17  |
| DENND1A  | 57706  | Leukemia, MESH:D015470     | Cytarabine   | 28.46 | 82  |
| DONSON   | 29980  | Leukemia, MESH:D015470     | Calcitriol C | 28.46 | 19  |
| EP300    | 2033   | Leukemia, MESH:D015473     | Arsenic Tr   | 28.46 | 265 |



|          |        |                        |              |       |     |
|----------|--------|------------------------|--------------|-------|-----|
| FAM117A  | 81558  | Leukemia, MESH:D015470 | Air Polluta  | 28.46 | 26  |
| LIG1     | 3978   | Leukemia, MESH:D015473 | Arsenic Ar   | 28.46 | 161 |
| PATL1    | 219988 | Leukemia, MESH:D015470 | Dexameth     | 28.46 | 20  |
| TFF1     | 7031   | Leukemia, MESH:D015470 | Arsenic Tr   | 28.46 | 33  |
| ZNF395   | 55893  | Leukemia, MESH:D015470 | Dexameth     | 28.46 | 14  |
| ZNF652   | 22834  | Leukemia, MESH:D015470 | Dexameth     | 28.46 | 20  |
| CCL1     | 6346   | Leukemia, MESH:D015473 | Arsenic Ar   | 28.45 | 265 |
| SNHG32   | 50854  | Leukemia, MESH:D015473 | Arsenic Ar   | 28.45 | 161 |
| FTH1     | 2495   | Leukemia, MESH:D015473 | Antimony     | 28.44 | 266 |
| ACTN2    | 88     | Leukemia, MESH:D015470 | Air Polluta  | 28.42 | 18  |
| ANGPTL4  | 51129  | Leukemia, MESH:D015470 | Bezafibrat   | 28.42 | 30  |
| ARHGAP2  | 83478  | Leukemia, MESH:D015470 | Dexameth     | 28.42 | 15  |
| AZGP1    | 563    | Leukemia, MESH:D015470 | Arsenic Tr   | 28.42 | 30  |
| CD93     | 22918  | Leukemia, MESH:D015470 | Air Polluta  | 28.42 | 20  |
| COL15A1  | 1306   | Leukemia, MESH:D015470 | Dexameth     | 28.42 | 29  |
| EMP2     | 2013   | Leukemia, MESH:D015470 | Arsenic Tr   | 28.42 | 30  |
| FGD4     | 121512 | Leukemia, MESH:D015470 | Air Polluta  | 28.42 | 16  |
| IL17RB   | 55540  | Leukemia, MESH:D015470 | Calcitriol C | 28.42 | 19  |
| MEF2D    | 4209   | Leukemia, MESH:D015470 | Azacitidine  | 28.42 | 33  |
| SATB1    | 6304   | Leukemia, MESH:D015470 | Arsenic Tr   | 28.42 | 46  |
| SMIM14   | 201895 | Leukemia, MESH:D015470 | Calcitriol C | 28.42 | 22  |
| SQOR     | 58472  | Leukemia, MESH:D015470 | Air Polluta  | 28.42 | 24  |
| ZFHx4    | 79776  | Leukemia, MESH:D015470 | Calcitriol C | 28.42 | 86  |
| BMP4     | 652    | Leukemia, MESH:D015473 | Arsenic Ar   | 28.41 | 164 |
| MCM6     | 4175   | Leukemia, MESH:D015473 | Arsenic Tr   | 28.41 | 264 |
| FOSL1    | 8061   | Leukemia, MESH:D015473 | alpha-Toc    | 28.4  | 266 |
| ARHGDIB  | 397    | Leukemia, MESH:D015473 | Arsenic Ar   | 28.39 | 268 |
| PTCH1    | 5727   | Leukemia, MESH:D015473 | Arsenic Ar   | 28.39 | 266 |
| ALOX5AP  | 241    | Leukemia, MESH:D015470 | Arsenic Tr   | 28.38 | 37  |
| FAH      | 2184   | Leukemia, MESH:D015470 | Benzoates    | 28.38 | 16  |
| TRADD    | 8717   | Leukemia, MESH:D015470 | Dexameth     | 28.38 | 15  |
| JAK2     | 3717   | Leukemia, MESH:D015470 | 15-deoxy-    | 28.37 | 67  |
| IL1B     | 3553   | Leukemia, MESH:D015473 | alpha-Toc    | 28.37 | 274 |
| CASP6    | 839    | Leukemia, MESH:D015473 | Arsenic Ar   | 28.36 | 268 |
| NAMPT    | 10135  | Leukemia, MESH:D015473 | Arsenic Tr   | 28.36 | 267 |
| SMAD3    | 4088   | Leukemia, MESH:D015473 | Arsenic Ar   | 28.36 | 266 |
| HMCN1    | 83872  | Leukemia, MESH:D015473 | Arsenic Ca   | 28.35 | 156 |
| OASL     | 8638   | Leukemia, MESH:D015473 | Arsenic Ca   | 28.35 | 163 |
| CEBPB    | 1051   | Leukemia, MESH:D015473 | Arsenic Ar   | 28.34 | 272 |
| ANXA2P3  | 305    | Leukemia, MESH:D015470 | Arsenic Tr   | 28.31 | 16  |
| FBP2     | 8789   | Leukemia, MESH:D015470 | Benzene C    | 28.31 | 33  |
| KDM1A    | 23028  | Leukemia, MESH:D015470 | Arsenic Tr   | 28.31 | 22  |
| KLF13    | 51621  | Leukemia, MESH:D015470 | Arsenic Tr   | 28.31 | 39  |
| PIP5K1B  | 8395   | Leukemia, MESH:D015470 | Doxorubic    | 28.31 | 24  |
| UBE2L6   | 9246   | Leukemia, MESH:D015470 | Arsenic Tr   | 28.31 | 29  |
| CD27     | 939    | Leukemia, MESH:D015470 | Arsenic Tr   | 28.3  | 20  |
| GIT2     | 9815   | Leukemia, MESH:D015470 | Air Polluta  | 28.3  | 24  |
| MGAT4A   | 11320  | Leukemia, MESH:D015470 | Doxorubic    | 28.3  | 20  |
| PHLDB2   | 90102  | Leukemia, MESH:D015470 | Arsenic Tr   | 28.3  | 21  |
| PLEKHF2  | 79666  | Leukemia, MESH:D015470 | Dexameth     | 28.3  | 14  |
| RAB2A    | 5862   | Leukemia, MESH:D015470 | Arsenic Tr   | 28.3  | 19  |
| RAP1GAP2 | 23108  | Leukemia, MESH:D015470 | Calcitriol C | 28.3  | 16  |
| SMARCB1  | 6598   | Leukemia, MESH:D015470 | Arsenic Tr   | 28.3  | 24  |
| CAPG     | 822    | Leukemia, MESH:D015470 | Arsenic Tr   | 28.29 | 25  |
| AGO2     | 27161  | Leukemia, MESH:D015470 | Arsenic Tr   | 28.29 | 24  |
| CLIC4    | 25932  | Leukemia, MESH:D015470 | Air Polluta  | 28.29 | 18  |
| ECE1     | 1889   | Leukemia, MESH:D015470 | Benzene C    | 28.29 | 35  |
| LGMN     | 5641   | Leukemia, MESH:D015470 | Arsenic Tr   | 28.29 | 23  |

|          |        |                            |              |       |     |
|----------|--------|----------------------------|--------------|-------|-----|
| ATG5     | 9474   | Leukemia, MESH:D015473     | Arsenic Tr   | 28.27 | 265 |
| PRKN     | 5071   | Leukemia, MESH:D015470     | Arsenic Tr   | 28.27 | 26  |
| CDCA3    | 83461  | Leukemia, MESH:D015473     | Arsenic Ar   | 28.26 | 161 |
| LY96     | 23643  | Leukemia, MESH:D015473     | Arsenic Ar   | 28.26 | 164 |
| MXD1     | 4084   | Leukemia, MESH:D015473     | Arsenic Ar   | 28.26 | 267 |
| PAK2     | 5062   | Leukemia, MESH:D015473     | Arsenic Ar   | 28.26 | 268 |
| C1ORF21  | 81563  | Leukemia, MESH:D015470     | Calcitriol C | 28.25 | 15  |
| DFFA     | 1676   | Leukemia, MESH:D007948     | 2-(2-amin    | 28.23 | 3   |
| PIK3R1   | 5295   | Leukemia, MESH:D015470     | Alitretinoin | 28.23 | 55  |
| ABCC6    | 368    | Leukemia, MESH:D015470     | Alitretinoin | 28.21 | 21  |
| BAMBI    | 25805  | Leukemia, MESH:D015470     | Arsenic Tr   | 28.21 | 34  |
| RETSAT   | 54884  | Leukemia, MESH:D015470     | Dexameth     | 28.21 | 27  |
| TCF7L2   | 6934   | Leukemia, MESH:D015470     | Arsenic Tr   | 28.21 | 24  |
| APP      | 351    | Leukemia, MESH:D015470     | Alitretinoin | 28.2  | 63  |
| CX3CL1   | 6376   | Leukemia, MESH:D015470     | Air Polluta  | 28.2  | 25  |
| ITGA4    | 3676   | Leukemia, MESH:D015473     | Arsenic Tr   | 28.2  | 267 |
| MYCN     | 4613   | Leukemia, MESH:D015473     | Antimony     | 28.2  | 264 |
| CD34     | 947    | Leukemia, MESH:D015470     | Arsenic Tr   | 28.19 | 47  |
| CSE1L    | 1434   | Leukemia, MESH:D015470     | Calcitriol C | 28.19 | 24  |
| TPMT     | 7172   | Leukemia, MESH:D015470     | Arsenic Tr   | 28.19 | 27  |
| INSR     | 3643   | Leukemia, MESH:D015470     | Alitretinoin | 28.18 | 23  |
| TNFRSF12 | 51330  | Leukemia, MESH:D015473     | Arsenic Ar   | 28.17 | 266 |
| DENND5A  | 23258  | Leukemia, MESH:D015470     | Air Polluta  | 28.15 | 32  |
| FAM111B  | 374393 | Leukemia, MESH:D015470     | Calcitriol C | 28.15 | 21  |
| FGF4     | 2249   | Leukemia, MESH:D015470     | Decitabine   | 28.15 | 19  |
| TRPC1    | 7220   | Leukemia, MESH:D015470     | Arsenic Tr   | 28.15 | 21  |
| DNMT3A   | 1788   | Leukemia, MESH:D01marker/m | Arsenic Ar   | 28.13 | 268 |
| ACTA1    | 58     | Leukemia, MESH:D015470     | Calcitriol C | 28.13 | 105 |
| ARNTL    | 406    | Leukemia, MESH:D015470     | Air Polluta  | 28.13 | 26  |
| GSTO1    | 9446   | Leukemia, MESH:D015470     | Arsenic Tr   | 28.13 | 31  |
| HADH     | 3033   | Leukemia, MESH:D015470     | Air Polluta  | 28.13 | 26  |
| JAK1     | 3716   | Leukemia, MESH:D015470     | Arsenic Tr   | 28.13 | 25  |
| IGF2     | 3481   | Leukemia, MESH:D015470     | Arsenic Tr   | 28.12 | 32  |
| NOTCH2   | 4853   | Leukemia, MESH:D015470     | Arsenic Tr   | 28.12 | 24  |
| FASN     | 2194   | Leukemia, MESH:D015473     | Arsenic Ar   | 28.11 | 269 |
| CCL8     | 6355   | Leukemia, MESH:D015470     | Bortezomi    | 28.09 | 20  |
| MIR155   | 406947 | Leukemia, MESH:D015470     | Air Polluta  | 28.09 | 25  |
| PRF1     | 5551   | Leukemia, MESH:D015470     | Air Polluta  | 28.09 | 23  |
| STAR     | 6770   | Leukemia, MESH:D015470     | Arsenic Tr   | 28.09 | 32  |
| ABCA5    | 23461  | Leukemia, MESH:D015470     | Docetaxel    | 28.08 | 19  |
| RHOA     | 58480  | Leukemia, MESH:D015470     | Decitabine   | 28.08 | 26  |
| ST3GAL6  | 10402  | Leukemia, MESH:D015470     | Azacididine  | 28.08 | 91  |
| UBE2H    | 7328   | Leukemia, MESH:D015470     | Air Polluta  | 28.08 | 20  |
| XIAP     | 331    | Leukemia, MESH:D007948     | 2-(2-amin    | 28.08 | 4   |
| COL5A1   | 1289   | Leukemia, MESH:D015470     | Cytarabine   | 28.07 | 88  |
| PLXNC1   | 10154  | Leukemia, MESH:D015473     | Arsenic Ar   | 28.07 | 266 |
| ADGRG1   | 9289   | Leukemia, MESH:D015470     | Air Polluta  | 28.04 | 26  |
| DDX17    | 10521  | Leukemia, MESH:D015470     | Dexameth     | 28.04 | 16  |
| JUP      | 3728   | Leukemia, MESH:D015470     | Calcitriol C | 28.04 | 26  |
| KIFC1    | 3833   | Leukemia, MESH:D015470     | Benzene E    | 28.04 | 35  |
| MCM10    | 55388  | Leukemia, MESH:D015470     | Calcitriol C | 28.04 | 29  |
| PRKCA    | 5578   | Leukemia, MESH:D015473     | Arsenic Ar   | 28.04 | 266 |
| SDC2     | 6383   | Leukemia, MESH:D015470     | Arsenic Tr   | 28.04 | 35  |
| SMOX     | 54498  | Leukemia, MESH:D015470     | Air Polluta  | 28.04 | 19  |
| TRIP13   | 9319   | Leukemia, MESH:D015470     | Arsenic Tr   | 28.04 | 23  |
| H2-K1    | 14972  | Leukemia, MESH:D015470     | Azacididine  | 28.03 | 14  |
| SSH3     | 54961  | Leukemia, MESH:D015470     | Decitabine   | 28.03 | 22  |
| ACVR1C   | 130399 | Leukemia, MESH:D015470     | Benzene C    | 28.01 | 31  |

|         |        |                        |              |       |     |
|---------|--------|------------------------|--------------|-------|-----|
| KLK6    | 5653   | Leukemia, MESH:D015470 | Calcitriol[C | 28.01 | 88  |
| NCOA6   | 23054  | Leukemia, MESH:D015470 | Dexameth     | 28.01 | 16  |
| NRAP    | 4892   | Leukemia, MESH:D015470 | Cyclophos    | 28.01 | 52  |
| PLEKHH1 | 57475  | Leukemia, MESH:D015470 | Dexameth     | 28.01 | 11  |
| PRKAR1B | 5575   | Leukemia, MESH:D015470 | Arsenic Tr   | 28.01 | 24  |
| SIRT5   | 23408  | Leukemia, MESH:D015470 | Arsenic Tr   | 28.01 | 18  |
| SNN     | 8303   | Leukemia, MESH:D015470 | Alitretinoi  | 28.01 | 14  |
| UNC93B1 | 81622  | Leukemia, MESH:D015470 | Air Polluta  | 28.01 | 12  |
| ZFPM2   | 23414  | Leukemia, MESH:D015470 | Arsenic Tr   | 28.01 | 87  |
| CENPE   | 1062   | Leukemia, MESH:D015473 | Arsenic[ar   | 28    | 161 |
| ESYT1   | 23344  | Leukemia, MESH:D015470 | Air Polluta  | 28    | 23  |
| GAP43   | 2596   | Leukemia, MESH:D015470 | Arsenic Tr   | 28    | 91  |
| GBP2    | 2634   | Leukemia, MESH:D015473 | Arsenic[ar   | 28    | 160 |
| GPD1L   | 23171  | Leukemia, MESH:D015470 | Dexameth     | 28    | 17  |
| LRP10   | 26020  | Leukemia, MESH:D015470 | Calcitriol[C | 28    | 11  |
| USP53   | 54532  | Leukemia, MESH:D015470 | Bortezomi    | 28    | 12  |
| MIR29A  | 407021 | Leukemia, MESH:D015473 | Arsenic[Ar   | 27.99 | 163 |
| AMD1    | 262    | Leukemia, MESH:D015470 | Arsenic Tr   | 27.98 | 23  |
| DTYMK   | 1841   | Leukemia, MESH:D015470 | Calcitriol[C | 27.98 | 20  |
| FXYD5   | 53827  | Leukemia, MESH:D015470 | Decitabine   | 27.98 | 24  |
| HDAC3   | 8841   | Leukemia, MESH:D015470 | 15-deoxy-    | 27.98 | 18  |
| LGR4    | 55366  | Leukemia, MESH:D015470 | Arsenic Tr   | 27.98 | 32  |
| NAB2    | 4665   | Leukemia, MESH:D015470 | Arsenic Tr   | 27.98 | 37  |
| OAS1    | 4938   | Leukemia, MESH:D015470 | Air Polluta  | 27.98 | 20  |
| PDGFRL  | 5157   | Leukemia, MESH:D015470 | Calcitriol[C | 27.98 | 24  |
| POLA2   | 23649  | Leukemia, MESH:D015470 | Calcitriol[C | 27.98 | 20  |
| PPAT    | 5471   | Leukemia, MESH:D015473 | Arsenic[Ar   | 27.98 | 266 |
| ARF1    | 375    | Leukemia, MESH:D015473 | Arsenic[Ar   | 27.97 | 265 |
| DEPDC1  | 55635  | Leukemia, MESH:D015473 | Arsenic Tr   | 27.97 | 262 |
| CDT1    | 81620  | Leukemia, MESH:D015470 | Bortezomi    | 27.96 | 17  |
| ENPP1   | 5167   | Leukemia, MESH:D015470 | Allopurinc   | 27.96 | 19  |
| PTGS2   | 5743   | Leukemia, MESH:D015473 | alpha-Toc    | 27.96 | 275 |
| SLC39A8 | 64116  | Leukemia, MESH:D015470 | Benzoates    | 27.96 | 21  |
| SPAG5   | 10615  | Leukemia, MESH:D015470 | Azacitidine  | 27.96 | 32  |
| ALOX5   | 240    | Leukemia, MESH:D015470 | Air Polluta  | 27.95 | 38  |
| IFI27   | 3429   | Leukemia, MESH:D015470 | Calcitriol[C | 27.95 | 28  |
| MCL1    | 4170   | Leukemia, MESH:D007948 | 2-(2-amin    | 27.95 | 4   |
| USP18   | 11274  | Leukemia, MESH:D015470 | Benzene[C    | 27.95 | 35  |
| FBLN1   | 2192   | Leukemia, MESH:D015473 | Arsenic Tr   | 27.94 | 264 |
| PCDHA11 | 56138  | Leukemia, MESH:D015470 | Azacitidine  | 27.94 | 10  |
| PLTP    | 5360   | Leukemia, MESH:D015473 | alpha-Toc    | 27.94 | 268 |
| GATA4   | 2626   | Leukemia, MESH:D015470 | Arsenic Tr   | 27.93 | 25  |
| CYP17A1 | 1586   | Leukemia, MESH:D015470 | Androgen     | 27.91 | 43  |
| LOX     | 4015   | Leukemia, MESH:D015470 | Calcitriol[C | 27.9  | 95  |
| CD53    | 963    | Leukemia, MESH:D015473 | Arsenic Tr   | 27.88 | 267 |
| GPM6B   | 2824   | Leukemia, MESH:D015473 | Arsenic Tr   | 27.88 | 259 |
| IVL     | 3713   | Leukemia, MESH:D015473 | Antimony     | 27.88 | 267 |
| MVP     | 9961   | Leukemia, MESH:D015473 | Antineopl    | 27.88 | 266 |
| ARRDC2  | 27106  | Leukemia, MESH:D015470 | Benzene[C    | 27.87 | 33  |
| BDH2    | 56898  | Leukemia, MESH:D015470 | Arsenic Tr   | 27.87 | 22  |
| CEMIP2  | 23670  | Leukemia, MESH:D015470 | Dexameth     | 27.87 | 17  |
| DST     | 667    | Leukemia, MESH:D015470 | Arsenic Tr   | 27.87 | 18  |
| NQO2    | 4835   | Leukemia, MESH:D015470 | Arsenic Tr   | 27.87 | 25  |
| OGN     | 4969   | Leukemia, MESH:D015470 | Arsenic Tr   | 27.87 | 26  |
| PRIM2   | 5558   | Leukemia, MESH:D015470 | Benzene[C    | 27.87 | 28  |
| RALA    | 5898   | Leukemia, MESH:D015470 | Androgen     | 27.87 | 22  |
| TACSTD2 | 4070   | Leukemia, MESH:D015470 | Alitretinoi  | 27.87 | 19  |
| TCF7    | 6932   | Leukemia, MESH:D015470 | Arsenic Tr   | 27.87 | 27  |

|          |        |                        |              |       |     |
|----------|--------|------------------------|--------------|-------|-----|
| ZBTB10   | 65986  | Leukemia, MESH:D015470 | Air Polluta  | 27.87 | 21  |
| MLLT10   | 8028   | Leukemia, MESH:D015470 | Arsenic Tr   | 27.86 | 24  |
| AGPS     | 8540   | Leukemia, MESH:D015470 | Arsenic Tr   | 27.86 | 18  |
| CNNM2    | 54805  | Leukemia, MESH:D015470 | Arsenic Tr   | 27.86 | 22  |
| DNA2     | 1763   | Leukemia, MESH:D015470 | Calcitriol[C | 27.86 | 16  |
| H3C4     | 8351   | Leukemia, MESH:D015470 | Calcitriol[C | 27.86 | 12  |
| IPO9     | 55705  | Leukemia, MESH:D015470 | Calcitriol[C | 27.86 | 17  |
| PUS7     | 54517  | Leukemia, MESH:D015470 | Busulfan[C   | 27.86 | 12  |
| RGS20    | 8601   | Leukemia, MESH:D015470 | Cytarabine   | 27.86 | 86  |
| RNF144A  | 9781   | Leukemia, MESH:D015470 | Arsenic Tr   | 27.86 | 40  |
| STK38L   | 23012  | Leukemia, MESH:D015470 | Air Polluta  | 27.86 | 18  |
| TMEM38B  | 55151  | Leukemia, MESH:D015470 | Dexameth     | 27.86 | 17  |
| TNKS     | 8658   | Leukemia, MESH:D015470 | Bortezomi    | 27.86 | 33  |
| IL13     | 3596   | Leukemia, MESH:D015470 | Air Polluta  | 27.85 | 25  |
| MXRA5    | 25878  | Leukemia, MESH:D015473 | Arsenic[C    | 27.84 | 157 |
| SOD1     | 6647   | Leukemia, MESH:D015473 | Aclarubicin  | 27.84 | 268 |
| CDH1     | 999    | Leukemia, MESH:D015473 | 2-(2-chloro  | 27.83 | 269 |
| EXOG     | 9941   | Leukemia, MESH:D015470 | Arsenic Tr   | 27.82 | 88  |
| H4C11    | 8363   | Leukemia, MESH:D015470 | Arsenic Tr   | 27.82 | 22  |
| PCYT1B   | 9468   | Leukemia, MESH:D015470 | Doxorubic    | 27.82 | 18  |
| SULF2    | 55959  | Leukemia, MESH:D015473 | Arsenic[Ar   | 27.82 | 265 |
| BHLHE40  | 8553   | Leukemia, MESH:D015473 | Arsenic[Ar   | 27.81 | 270 |
| FTL      | 2512   | Leukemia, MESH:D015470 | Arsenic Tr   | 27.8  | 56  |
| LPIN1    | 23175  | Leukemia, MESH:D015470 | Air Polluta  | 27.8  | 19  |
| CD44     | 960    | Leukemia, MESH:D015470 | Arsenic[Ar   | 27.79 | 275 |
| ELK1     | 2002   | Leukemia, MESH:D015470 | Arsenic Tr   | 27.79 | 36  |
| ESRRA    | 2101   | Leukemia, MESH:D015470 | Bortezomi    | 27.79 | 32  |
| LDLR     | 3949   | Leukemia, MESH:D015470 | Air Polluta  | 27.79 | 24  |
| PDE4D    | 5144   | Leukemia, MESH:D015470 | Air Polluta  | 27.79 | 42  |
| CD274    | 29126  | Leukemia, MESH:D015473 | Arsenic Tr   | 27.76 | 262 |
| CRY2     | 1408   | Leukemia, MESH:D015470 | Arsenic Tr   | 27.76 | 23  |
| FAM111A  | 63901  | Leukemia, MESH:D015470 | Cytarabine   | 27.76 | 89  |
| FOXC1    | 2296   | Leukemia, MESH:D015470 | Calcitriol[C | 27.76 | 25  |
| ILF3     | 3609   | Leukemia, MESH:D015470 | Cyclophos    | 27.76 | 19  |
| KDELR3   | 11015  | Leukemia, MESH:D015470 | Calcitriol[C | 27.76 | 90  |
| SLC9A3R1 | 9368   | Leukemia, MESH:D015473 | Arsenic[Ar   | 27.76 | 270 |
| ST14     | 6768   | Leukemia, MESH:D015470 | Calcitriol[C | 27.76 | 18  |
| SYNJ2    | 8871   | Leukemia, MESH:D015470 | Arsenic Tr   | 27.76 | 19  |
| TAX1BP3  | 30851  | Leukemia, MESH:D015470 | Daunorub     | 27.76 | 49  |
| TRIM24   | 8805   | Leukemia, MESH:D015470 | Arsenic Tr   | 27.76 | 24  |
| CREB1    | 1385   | Leukemia, MESH:D015470 | Alitretinoin | 27.75 | 44  |
| CCL11    | 6356   | Leukemia, MESH:D015470 | Chloroqui    | 27.73 | 21  |
| POU5F1   | 5460   | Leukemia, MESH:D015470 | Arsenic Tr   | 27.73 | 35  |
| ARHGEF16 | 27237  | Leukemia, MESH:D015470 | Calcitriol[C | 27.72 | 17  |
| CIAPIN1  | 57019  | Leukemia, MESH:D015470 | Doxorubic    | 27.72 | 27  |
| DNMBP    | 23268  | Leukemia, MESH:D015470 | Arsenic Tr   | 27.72 | 22  |
| FCGR3A   | 2214   | Leukemia, MESH:D015470 | Air Polluta  | 27.72 | 32  |
| GPR37    | 2861   | Leukemia, MESH:D015470 | Arsenic Tr   | 27.72 | 29  |
| ISCA1    | 81689  | Leukemia, MESH:D015470 | Azacitidine  | 27.72 | 17  |
| NKD2     | 85409  | Leukemia, MESH:D015470 | Arsenic Tr   | 27.72 | 25  |
| RAC1     | 5879   | Leukemia, MESH:D015473 | Arsenic[Ar   | 27.72 | 266 |
| RELL1    | 768211 | Leukemia, MESH:D015470 | Dexameth     | 27.72 | 17  |
| SKA2     | 348235 | Leukemia, MESH:D015470 | Calcitriol[C | 27.72 | 19  |
| STX2     | 2054   | Leukemia, MESH:D015470 | Carboplati   | 27.72 | 17  |
| TRAM2    | 9697   | Leukemia, MESH:D015470 | Calcitriol[C | 27.72 | 17  |
| USP3     | 9960   | Leukemia, MESH:D015470 | Arsenic Tr   | 27.72 | 33  |
| ABCD3    | 5825   | Leukemia, MESH:D015470 | Air Polluta  | 27.71 | 18  |
| IL7R     | 3575   | Leukemia, MESH:D015470 | Bortezomi    | 27.71 | 26  |

|         |        |                        |              |       |     |
|---------|--------|------------------------|--------------|-------|-----|
| EPHA1   | 2041   | Leukemia, MESH:D015473 | Antimony     | 27.7  | 160 |
| FEN1    | 2237   | Leukemia, MESH:D015473 | arsenite C   | 27.7  | 159 |
| LTBR    | 4055   | Leukemia, MESH:D015473 | Arsenic Tr   | 27.7  | 261 |
| PRDM2   | 7799   | Leukemia, MESH:D015473 | Arsenic ar   | 27.7  | 163 |
| TMPO    | 7112   | Leukemia, MESH:D015473 | Arsenic Tr   | 27.7  | 268 |
| PLAU    | 5328   | Leukemia, MESH:D015473 | Arsenic Ar   | 27.69 | 264 |
| SRC     | 6714   | Leukemia, MESH:D015470 | Arsenic Tr   | 27.67 | 38  |
| ADAMTS9 | 56999  | Leukemia, MESH:D015470 | Calcitriol C | 27.66 | 84  |
| ERCC4   | 2072   | Leukemia, MESH:D015470 | Arsenic Tr   | 27.66 | 23  |
| MYO5A   | 4644   | Leukemia, MESH:D015470 | Bortezomi    | 27.66 | 15  |
| PTGIS   | 5740   | Leukemia, MESH:D015470 | Calcitriol C | 27.66 | 19  |
| RABGGTB | 5876   | Leukemia, MESH:D015470 | Benzene C    | 27.66 | 96  |
| JUNB    | 3726   | Leukemia, MESH:D015473 | alpha-Toc    | 27.65 | 268 |
| KLF4    | 9314   | Leukemia, MESH:D015473 | Arsenic Ar   | 27.63 | 265 |
| NDUFS1  | 4719   | Leukemia, MESH:D015470 | Arsenic Tr   | 27.63 | 39  |
| NFIA    | 4774   | Leukemia, MESH:D015470 | Arsenic Tr   | 27.63 | 24  |
| PTK2B   | 2185   | Leukemia, MESH:D015473 | Arsenic Ar   | 27.63 | 271 |
| THY1    | 7070   | Leukemia, MESH:D015473 | Arsenic ar   | 27.63 | 164 |
| CSE1L   | 1434   | Leukemia, MESH:D015473 | Arsenic ar   | 27.62 | 162 |
| IL5     | 3567   | Leukemia, MESH:D015470 | Air Polluta  | 27.62 | 19  |
| MSX2    | 4488   | Leukemia, MESH:D015473 | Arsenic Tr   | 27.62 | 261 |
| BCL2A1A | 12044  | Leukemia, MESH:D015470 | Alitretinoin | 27.61 | 15  |
| CENPW   | 387103 | Leukemia, MESH:D015473 | arsenite C   | 27.61 | 158 |
| CHRA1   | 54108  | Leukemia, MESH:D015470 | Decitabine   | 27.61 | 21  |
| FAM32A  | 26017  | Leukemia, MESH:D015470 | Dexameth     | 27.61 | 15  |
| KCNQ1OT | 10984  | Leukemia, MESH:D015470 | Doxorubic    | 27.61 | 17  |
| LRIG1   | 26018  | Leukemia, MESH:D015473 | Antimony     | 27.61 | 162 |
| MAPKBP1 | 23005  | Leukemia, MESH:D015470 | Dexameth     | 27.61 | 17  |
| PTPRG   | 5793   | Leukemia, MESH:D015473 | Arsenic ar   | 27.61 | 160 |
| RAD54L  | 8438   | Leukemia, MESH:D015473 | Arsenic ar   | 27.61 | 161 |
| SYTL2   | 54843  | Leukemia, MESH:D015473 | Arsenic Cy   | 27.61 | 163 |
| TAF5    | 25817  | Leukemia, MESH:D015470 | Arsenic Tr   | 27.61 | 18  |
| WDHD1   | 11169  | Leukemia, MESH:D015473 | arsenite C   | 27.61 | 159 |
| ZNF462  | 58499  | Leukemia, MESH:D015470 | Calcitriol C | 27.61 | 15  |
| ANXA8L1 | 728113 | Leukemia, MESH:D015470 | Cytarabine   | 27.6  | 77  |
| DNAJB4  | 11080  | Leukemia, MESH:D015470 | Arsenic Tr   | 27.6  | 41  |
| H2BC12L | 54145  | Leukemia, MESH:D015470 | Doxorubic    | 27.6  | 18  |
| SLPI    | 6590   | Leukemia, MESH:D015470 | Benzene C    | 27.6  | 34  |
| PTEN    | 5728   | Leukemia, MESH:D007948 | 2-(2-amin    | 27.59 | 4   |
| CP      | 1356   | Leukemia, MESH:D015470 | Arsenic Tr   | 27.58 | 30  |
| HES1    | 3280   | Leukemia, MESH:D015473 | Arsenic Ar   | 27.58 | 267 |
| THRA    | 7067   | Leukemia, MESH:D015470 | Amsacrine    | 27.58 | 33  |
| MACROH1 | 9555   | Leukemia, MESH:D015470 | Dexameth     | 27.57 | 16  |
| MAD2L1  | 4085   | Leukemia, MESH:D015473 | Arsenic Ar   | 27.57 | 267 |
| MCOLN3  | 55283  | Leukemia, MESH:D015470 | Arsenic Tr   | 27.57 | 87  |
| PALM2AK | 445815 | Leukemia, MESH:D015470 | Arsenic Tr   | 27.57 | 19  |
| PTPN18  | 26469  | Leukemia, MESH:D015470 | Dexameth     | 27.57 | 18  |
| SCAF11  | 9169   | Leukemia, MESH:D015470 | Dronabinc    | 27.57 | 17  |
| WNT3    | 7473   | Leukemia, MESH:D015470 | Decitabine   | 27.57 | 22  |
| ARNT2   | 9915   | Leukemia, MESH:D015470 | Arsenic Tr   | 27.56 | 24  |
| CDC7    | 8317   | Leukemia, MESH:D015470 | Arsenic Tr   | 27.56 | 24  |
| EGR1    | 1958   | Leukemia, MESH:D015473 | Arsenic Ar   | 27.56 | 270 |
| FILIP1L | 11259  | Leukemia, MESH:D015470 | Azacitidine  | 27.56 | 41  |
| FZD1    | 8321   | Leukemia, MESH:D015470 | Arsenic Tr   | 27.56 | 32  |
| GNG11   | 2791   | Leukemia, MESH:D015470 | Benzene C    | 27.56 | 33  |
| GSDME   | 1687   | Leukemia, MESH:D015470 | Benzene C    | 27.56 | 33  |
| NSD2    | 7468   | Leukemia, MESH:D015470 | Arsenic Tr   | 27.56 | 23  |
| PLIN3   | 10226  | Leukemia, MESH:D015470 | Chloroqui    | 27.56 | 85  |

|           |          |                        |              |       |     |
|-----------|----------|------------------------|--------------|-------|-----|
| RABGAP1I  | 9910     | Leukemia, MESH:D015470 | Benzoates    | 27.56 | 18  |
| RGL1      | 23179    | Leukemia, MESH:D015470 | Arsenic Tr   | 27.56 | 97  |
| RPA2      | 6118     | Leukemia, MESH:D015470 | Air Polluta  | 27.56 | 15  |
| SNX10     | 29887    | Leukemia, MESH:D015470 | Cyclophos    | 27.56 | 25  |
| TOB1      | 10140    | Leukemia, MESH:D015470 | Dexameth     | 27.56 | 20  |
| SLC8A1    | 6546     | Leukemia, MESH:D015470 | Air Polluta  | 27.55 | 33  |
| TGIF1     | 7050     | Leukemia, MESH:D015470 | Alitretinoi  | 27.55 | 34  |
| ULK1      | 8408     | Leukemia, MESH:D015470 | Arsenic Tr   | 27.55 | 19  |
| FDFT1     | 2222     | Leukemia, MESH:D015473 | Antimony     | 27.54 | 160 |
| TNFRSF1B  | 7133     | Leukemia, MESH:D015470 | Air Polluta  | 27.54 | 33  |
| CCL8      | 6355     | Leukemia, MESH:D015473 | Arsenic Ca   | 27.53 | 17  |
| CASP12    | 1.01E+08 | Leukemia, MESH:D015470 | Arsenic Tr   | 27.52 | 27  |
| TH        | 7054     | Leukemia, MESH:D007948 | 2-(2-amin    | 27.52 | 4   |
| ABCC4     | 10257    | Leukemia, MESH:D015473 | Arsenic Ar   | 27.51 | 268 |
| CDK5R1    | 8851     | Leukemia, MESH:D007948 | Arsenic Tr   | 27.51 | 4   |
| CXCL14    | 9547     | Leukemia, MESH:D015473 | Arsenic Tr   | 27.51 | 264 |
| DPYD      | 1806     | Leukemia, MESH:D015470 | Air Polluta  | 27.48 | 30  |
| COX4I1    | 1327     | Leukemia, MESH:D015470 | Arsenic Tr   | 27.47 | 52  |
| G6PD      | 2539     | Leukemia, MESH:D015470 | Alitretinoi  | 27.47 | 31  |
| SHH       | 6469     | Leukemia, MESH:D015470 | Androgen     | 27.47 | 20  |
| AMACR     | 23600    | Leukemia, MESH:D015470 | Arsenic Tr   | 27.45 | 19  |
| CHST15    | 51363    | Leukemia, MESH:D015470 | Air Polluta  | 27.45 | 20  |
| COL14A1   | 7373     | Leukemia, MESH:D015470 | Arsenic Tr   | 27.45 | 27  |
| DIO2      | 1734     | Leukemia, MESH:D015473 | Arsenic Bu   | 27.45 | 16  |
| MMD       | 23531    | Leukemia, MESH:D015470 | Arsenic Tr   | 27.45 | 34  |
| MT1H      | 4496     | Leukemia, MESH:D015470 | Arsenic Tr   | 27.45 | 31  |
| PIGA      | 5277     | Leukemia, MESH:D015470 | Air Polluta  | 27.45 | 25  |
| SMAD6     | 4091     | Leukemia, MESH:D015470 | Arsenic Tr   | 27.45 | 101 |
| CEBPZ     | 10153    | Leukemia, MESH:D015470 | Arsenic Tr   | 27.44 | 48  |
| IMMT      | 10989    | Leukemia, MESH:D015470 | Dexameth     | 27.44 | 25  |
| MAPRE3    | 22924    | Leukemia, MESH:D015470 | Decitabine   | 27.44 | 25  |
| OAS1      | 4938     | Leukemia, MESH:D015473 | Arsenic ar:  | 27.44 | 160 |
| PTPRE     | 5791     | Leukemia, MESH:D015473 | Arsenic Ar   | 27.44 | 269 |
| RCOR3     | 55758    | Leukemia, MESH:D015470 | Dexameth     | 27.44 | 11  |
| RIMS3     | 9783     | Leukemia, MESH:D015470 | Benzene C    | 27.44 | 36  |
| SECISBP2I | 9728     | Leukemia, MESH:D015470 | Decitabine   | 27.44 | 22  |
| SOX13     | 9580     | Leukemia, MESH:D015470 | Arsenic Tr   | 27.44 | 19  |
| SURF4     | 6836     | Leukemia, MESH:D015470 | Benzene C    | 27.44 | 97  |
| TM6SF1    | 53346    | Leukemia, MESH:D015470 | Arsenic Tr   | 27.44 | 20  |
| YPEL5     | 51646    | Leukemia, MESH:D015473 | Arsenic Tr   | 27.44 | 264 |
| BRPF1     | 7862     | Leukemia, MESH:D015470 | Arsenic Tr   | 27.41 | 22  |
| CBR1      | 873      | Leukemia, MESH:D015470 | Androgen     | 27.41 | 55  |
| MOB3A     | 126308   | Leukemia, MESH:D015470 | Bortezomi    | 27.41 | 16  |
| SRP54     | 6729     | Leukemia, MESH:D015470 | Benzene C    | 27.41 | 28  |
| STMN1     | 3925     | Leukemia, MESH:D015473 | Arsenic Tr   | 27.41 | 265 |
| TUBA4A    | 7277     | Leukemia, MESH:D015473 | Arsenic De   | 27.4  | 163 |
| EGR3      | 1960     | Leukemia, MESH:D015470 | Arsenic Tr   | 27.39 | 37  |
| MXD1      | 4084     | Leukemia, MESH:D015470 | Arsenic Tr   | 27.39 | 37  |
| SFRP1     | 6422     | Leukemia, MESH:D015470 | Arsenic Tr   | 27.39 | 98  |
| FLT1      | 2321     | Leukemia, MESH:D015473 | Arsenic Tr   | 27.37 | 263 |
| FNBP1     | 23048    | Leukemia, MESH:D015470 | Dexameth     | 27.35 | 21  |
| LPCAT1    | 79888    | Leukemia, MESH:D015470 | Arsenic Tr   | 27.35 | 22  |
| PLEKHF1   | 79156    | Leukemia, MESH:D015470 | Decitabine   | 27.35 | 25  |
| SOS1      | 6654     | Leukemia, MESH:D015470 | Air Polluta  | 27.35 | 21  |
| ZEB2      | 9839     | Leukemia, MESH:D015473 | Arsenic ar:  | 27.34 | 160 |
| CCL20     | 6364     | Leukemia, MESH:D015473 | Arsenic Ar   | 27.32 | 266 |
| INSIG2    | 51141    | Leukemia, MESH:D015470 | Calcitriol C | 27.31 | 22  |
| ITGA4     | 3676     | Leukemia, MESH:D015470 | Alitretinoi  | 27.31 | 27  |

|         |        |                        |              |       |     |
|---------|--------|------------------------|--------------|-------|-----|
| MYCN    | 4613   | Leukemia, MESH:D015470 | Arsenic Tr   | 27.31 | 35  |
| AFDN    | 4301   | Leukemia, MESH:D015470 | Arsenic Tr   | 27.3  | 17  |
| ANP32B  | 10541  | Leukemia, MESH:D015470 | Arsenic Tr   | 27.3  | 26  |
| BSCL2   | 26580  | Leukemia, MESH:D015470 | Cyclophos    | 27.3  | 85  |
| GREM2   | 64388  | Leukemia, MESH:D015470 | Dasatinib    | 27.3  | 18  |
| MAX     | 4149   | Leukemia, MESH:D015470 | Arsenic Tr   | 27.3  | 25  |
| MSH3    | 4437   | Leukemia, MESH:D015470 | Cyclophos    | 27.3  | 16  |
| NDC1    | 55706  | Leukemia, MESH:D015470 | Dasatinib    | 27.3  | 18  |
| OCIAD2  | 132299 | Leukemia, MESH:D015470 | Decitabine   | 27.3  | 18  |
| RAB29   | 8934   | Leukemia, MESH:D015470 | Dexameth     | 27.3  | 19  |
| SIDT2   | 51092  | Leukemia, MESH:D015470 | Decitabine   | 27.3  | 25  |
| STK17A  | 9263   | Leukemia, MESH:D015470 | Arsenic Tr   | 27.3  | 30  |
| TPST1   | 8460   | Leukemia, MESH:D015470 | Calcitriol C | 27.3  | 80  |
| BAG3    | 9531   | Leukemia, MESH:D015470 | ABT-737 A    | 27.29 | 98  |
| CCR2    | 729230 | Leukemia, MESH:D015470 | Air Polluta  | 27.29 | 28  |
| NCOA2   | 10499  | Leukemia, MESH:D015470 | Arsenic Tr   | 27.29 | 55  |
| TNFAIP6 | 7130   | Leukemia, MESH:D015470 | Arsenic Tr   | 27.29 | 43  |
| AKAP12  | 9590   | Leukemia, MESH:D015473 | Arsenic Tr   | 27.28 | 263 |
| ABCA12  | 26154  | Leukemia, MESH:D015473 | Arsenic ars  | 27.27 | 159 |
| CSTA    | 1475   | Leukemia, MESH:D015473 | Arsenic Tr   | 27.27 | 262 |
| PLAAT4  | 5920   | Leukemia, MESH:D015473 | arsenite Ci  | 27.27 | 160 |
| SYNJ2   | 8871   | Leukemia, MESH:D015473 | Arsenic Ar   | 27.27 | 264 |
| TFF3    | 7033   | Leukemia, MESH:D015473 | arsenite Cl  | 27.27 | 21  |
| TRIO    | 7204   | Leukemia, MESH:D015473 | Bortezomi    | 27.25 | 19  |
| ATP6V1A | 523    | Leukemia, MESH:D015470 | Air Polluta  | 27.25 | 30  |
| GPX7    | 2882   | Leukemia, MESH:D015470 | Arsenic Tr   | 27.25 | 24  |
| MLLT11  | 10962  | Leukemia, MESH:D015470 | Arsenic Tr   | 27.25 | 30  |
| SYNM    | 23336  | Leukemia, MESH:D015470 | Calcitriol C | 27.25 | 15  |
| GSK3B   | 2932   | Leukemia, MESH:D015473 | Arsenic Ar   | 27.24 | 270 |
| EPHA2   | 1969   | Leukemia, MESH:D015470 | Dasatinib    | 27.23 | 27  |
| GATM    | 2628   | Leukemia, MESH:D015470 | Dexameth     | 27.23 | 22  |
| MEF2C   | 4208   | Leukemia, MESH:D015470 | Decitabine   | 27.23 | 27  |
| VASP    | 7408   | Leukemia, MESH:D015470 | Bortezomi    | 27.23 | 23  |
| ATP1A1  | 476    | Leukemia, MESH:D015470 | Calcitriol C | 27.22 | 32  |
| PRKDC   | 5591   | Leukemia, MESH:D015473 | Arsenic ars  | 27.22 | 165 |
| RGS4    | 5999   | Leukemia, MESH:D015473 | arsenite Ci  | 27.22 | 160 |
| ABCC10  | 89845  | Leukemia, MESH:D015470 | Docetaxel    | 27.21 | 16  |
| CA8     | 767    | Leukemia, MESH:D015470 | Dexameth     | 27.21 | 12  |
| HSPA8   | 3312   | Leukemia, MESH:D015473 | Antimony     | 27.21 | 266 |
| RCCD1   | 91433  | Leukemia, MESH:D015470 | Calcitriol C | 27.21 | 21  |
| SCAF1   | 58506  | Leukemia, MESH:D015470 | Arsenic Tr   | 27.21 | 22  |
| STX4    | 6810   | Leukemia, MESH:D015470 | Dexameth     | 27.21 | 13  |
| TRMT5   | 57570  | Leukemia, MESH:D015470 | Arsenic Tr   | 27.21 | 27  |
| WIPF2   | 147179 | Leukemia, MESH:D015470 | Dexameth     | 27.21 | 16  |
| MSMO1   | 6307   | Leukemia, MESH:D015473 | Antineopla   | 27.19 | 262 |
| PRDM16  | 63976  | Leukemia, MESH:D015473 | Arsenic ars  | 27.19 | 166 |
| RABGGTB | 5876   | Leukemia, MESH:D015473 | Cytarabine   | 27.19 | 162 |
| ANO3    | 63982  | Leukemia, MESH:D015470 | Arsenic Tr   | 27.16 | 42  |
| COL8A2  | 1296   | Leukemia, MESH:D015470 | Alitretinoi  | 27.16 | 23  |
| CYP26B1 | 56603  | Leukemia, MESH:D015470 | Alitretinoi  | 27.16 | 25  |
| ETS2    | 2114   | Leukemia, MESH:D015470 | Arsenic Tr   | 27.16 | 23  |
| LMO2    | 4005   | Leukemia, MESH:D015470 | Arsenic Tr   | 27.16 | 22  |
| MAN1A1  | 4121   | Leukemia, MESH:D015470 | Air Polluta  | 27.16 | 21  |
| NLE1    | 54475  | Leukemia, MESH:D015470 | Dexameth     | 27.16 | 16  |
| POLR1H  | 30834  | Leukemia, MESH:D015470 | Doxorubic    | 27.16 | 28  |
| SIN3A   | 25942  | Leukemia, MESH:D015470 | Arsenic Tr   | 27.16 | 29  |
| SLC31A1 | 1317   | Leukemia, MESH:D015470 | Bortezomi    | 27.16 | 23  |
| SOX4    | 6659   | Leukemia, MESH:D015473 | Arsenic Tr   | 27.16 | 262 |

|          |        |                        |              |       |     |
|----------|--------|------------------------|--------------|-------|-----|
| SP100    | 6672   | Leukemia, MESH:D015470 | Dexameth     | 27.16 | 20  |
| SPINT1   | 6692   | Leukemia, MESH:D015470 | Arsenic Tr   | 27.16 | 21  |
| TFPI     | 7035   | Leukemia, MESH:D015473 | Arsenic Cy   | 27.16 | 162 |
| TSPO     | 706    | Leukemia, MESH:D015470 | Cytarabine   | 27.16 | 93  |
| WDR26    | 80232  | Leukemia, MESH:D015470 | Dexameth     | 27.16 | 18  |
| CDKN2D   | 1032   | Leukemia, MESH:D015470 | Arsenic Tr   | 27.15 | 24  |
| CLIC1    | 1192   | Leukemia, MESH:D015470 | Decitabine   | 27.15 | 24  |
| CLMN     | 79789  | Leukemia, MESH:D015470 | Calcitriol C | 27.15 | 18  |
| DBF4     | 10926  | Leukemia, MESH:D015470 | Calcitriol E | 27.15 | 22  |
| DEPDC1B  | 55789  | Leukemia, MESH:D015470 | Calcitriol C | 27.15 | 19  |
| EPOR     | 2057   | Leukemia, MESH:D015470 | Arsenic Tr   | 27.15 | 41  |
| FAM43A   | 131583 | Leukemia, MESH:D015470 | Bortezomi    | 27.15 | 21  |
| GPC3     | 2719   | Leukemia, MESH:D015470 | Arsenic Tr   | 27.15 | 26  |
| MXI1     | 4601   | Leukemia, MESH:D015470 | Cyclophos    | 27.15 | 34  |
| ASPM     | 259266 | Leukemia, MESH:D015473 | Arsenic Tr   | 27.11 | 263 |
| CHUK     | 1147   | Leukemia, MESH:D015473 | 4'-methox    | 27.11 | 160 |
| PECAM1   | 5175   | Leukemia, MESH:D015473 | 2-(2-chlor   | 27.11 | 267 |
| CYP3A11  | 13112  | Leukemia, MESH:D015470 | Alitretinoi  | 27.1  | 25  |
| FZD1     | 8321   | Leukemia, MESH:D015473 | Arsenic Tr   | 27.1  | 263 |
| IL4R     | 3566   | Leukemia, MESH:D015473 | Arsenic Ar   | 27.1  | 264 |
| MYH11    | 4629   | Leukemia, MESH:D015473 | Arsenic De   | 27.1  | 163 |
| NSD2     | 7468   | Leukemia, MESH:D015473 | Arsenic Ar   | 27.1  | 265 |
| PAPPA    | 5069   | Leukemia, MESH:D015473 | Arsenic Tr   | 27.1  | 264 |
| ACSL3    | 2181   | Leukemia, MESH:D015470 | Calcitriol C | 27.08 | 42  |
| CENPE    | 1062   | Leukemia, MESH:D015470 | Calcitriol C | 27.08 | 20  |
| P2RX7    | 5027   | Leukemia, MESH:D015470 | Air Polluta  | 27.08 | 45  |
| BMP2     | 650    | Leukemia, MESH:D015473 | Arsenic Ar   | 27.07 | 266 |
| PRKCB    | 5579   | Leukemia, MESH:D015473 | Arsenic Ar   | 27.07 | 270 |
| ADAMTS5  | 11096  | Leukemia, MESH:D015470 | Arsenic Tr   | 27.06 | 24  |
| DLAT     | 1737   | Leukemia, MESH:D015470 | Decitabine   | 27.06 | 27  |
| PDE4A    | 5141   | Leukemia, MESH:D015470 | Arsenic Tr   | 27.06 | 36  |
| TLR6     | 10333  | Leukemia, MESH:D015470 | Air Polluta  | 27.06 | 31  |
| YWHAH    | 7533   | Leukemia, MESH:D015470 | Arsenic Tr   | 27.06 | 23  |
| TNFRSF1A | 7132   | Leukemia, MESH:D015473 | Arsenic Ar   | 27.05 | 266 |
| TFAM     | 7019   | Leukemia, MESH:D015470 | Calcitriol C | 27.04 | 31  |
| ATP6V0B  | 533    | Leukemia, MESH:D015470 | Arsenic Tr   | 27.03 | 16  |
| AXIN1    | 8312   | Leukemia, MESH:D015470 | Benzene C    | 27.03 | 36  |
| BCAS3    | 54828  | Leukemia, MESH:D015470 | Dexameth     | 27.03 | 17  |
| CELSR1   | 9620   | Leukemia, MESH:D015470 | Arsenic Tr   | 27.03 | 23  |
| COL17A1  | 1308   | Leukemia, MESH:D015470 | Alitretinoi  | 27.03 | 18  |
| JMY      | 133746 | Leukemia, MESH:D015470 | Air Polluta  | 27.03 | 17  |
| PRKX     | 5613   | Leukemia, MESH:D015470 | Benzene C    | 27.03 | 67  |
| PRPF8    | 10594  | Leukemia, MESH:D015470 | Arsenic Tr   | 27.03 | 32  |
| RASGRF1  | 5923   | Leukemia, MESH:D015470 | Arsenic Tr   | 27.03 | 18  |
| RFLNB    | 359845 | Leukemia, MESH:D015470 | Calcitriol C | 27.03 | 19  |
| RIT1     | 6016   | Leukemia, MESH:D015470 | Benzene B    | 27.03 | 26  |
| TBL1X    | 6907   | Leukemia, MESH:D015470 | Arsenic Tr   | 27.03 | 29  |
| CENPO    | 79172  | Leukemia, MESH:D015470 | Azacitidine  | 27.02 | 18  |
| DFFB     | 1677   | Leukemia, MESH:D015473 | Arsenic Ar   | 27.02 | 264 |
| DIAPH3   | 81624  | Leukemia, MESH:D015473 | Arsenic Tr   | 27.02 | 262 |
| FBXO41   | 150726 | Leukemia, MESH:D015470 | Decitabine   | 27.02 | 18  |
| LONRF2   | 164832 | Leukemia, MESH:D015470 | Cyclophos    | 27.02 | 15  |
| LXN      | 56925  | Leukemia, MESH:D015473 | Calcitriol C | 27.02 | 156 |
| MED7     | 9443   | Leukemia, MESH:D015470 | Dexameth     | 27.02 | 14  |
| NUDT7    | 283927 | Leukemia, MESH:D015473 | Arsenic Ar   | 27.02 | 266 |
| ODC1     | 4953   | Leukemia, MESH:D015473 | Arsenic Ar   | 27.02 | 271 |
| PAPOLG   | 64895  | Leukemia, MESH:D015470 | Air Polluta  | 27.02 | 14  |
| QSOX2    | 169714 | Leukemia, MESH:D015470 | Air Polluta  | 27.02 | 17  |



|          |        |                        |              |       |     |
|----------|--------|------------------------|--------------|-------|-----|
| TBP      | 6908   | Leukemia, MESH:D015470 | Arsenic Tr   | 27.02 | 29  |
| ZNF532   | 55205  | Leukemia, MESH:D015470 | Dexameth     | 27.02 | 14  |
| C5       | 727    | Leukemia, MESH:D015470 | Arsenic Tr   | 27.01 | 43  |
| PITX1    | 5307   | Leukemia, MESH:D015473 | Antimony     | 27.01 | 158 |
| ACTA2    | 59     | Leukemia, MESH:D015473 | Arsenic Ar   | 27    | 271 |
| MRPL24   | 79590  | Leukemia, MESH:D015473 | Arsenic Ar   | 27    | 266 |
| ETS1     | 2113   | Leukemia, MESH:D015473 | Arsenic Ar   | 26.99 | 266 |
| PLPP3    | 8613   | Leukemia, MESH:D015473 | Arsenic Ar   | 26.99 | 264 |
| ELK1     | 2002   | Leukemia, MESH:D007948 | 2-(2-amin    | 26.97 | 3   |
| MAP1LC3  | 440738 | Leukemia, MESH:D015470 | Decitabine   | 26.97 | 14  |
| CALB2    | 794    | Leukemia, MESH:D015470 | Arsenic Tr   | 26.96 | 89  |
| DFFA     | 1676   | Leukemia, MESH:D015470 | Aclarubicin  | 26.96 | 70  |
| G3BP1    | 10146  | Leukemia, MESH:D015470 | Cyclophos    | 26.96 | 18  |
| P4HA2    | 8974   | Leukemia, MESH:D015470 | Clioquinol   | 26.96 | 86  |
| PRKCH    | 5583   | Leukemia, MESH:D015470 | Air Polluta  | 26.96 | 35  |
| RRAGD    | 58528  | Leukemia, MESH:D015470 | Arsenic Tr   | 26.96 | 38  |
| CDKN2A   | 1029   | Leukemia, MESH:D015473 | Arsenic Ar   | 26.95 | 271 |
| CEBPD    | 1052   | Leukemia, MESH:D015473 | Arsenic Tr   | 26.94 | 269 |
| IGFBP4   | 3487   | Leukemia, MESH:D015473 | arsenic dis  | 26.94 | 264 |
| NES      | 10763  | Leukemia, MESH:D015473 | 2-(2-chlor   | 26.94 | 270 |
| NFE2L1   | 4779   | Leukemia, MESH:D015473 | Arsenic Ar   | 26.94 | 163 |
| SERPINB5 | 5268   | Leukemia, MESH:D015473 | Arsenic Ar   | 26.94 | 162 |
| FGF7     | 2252   | Leukemia, MESH:D007948 | 2-(2-amin    | 26.93 | 3   |
| MAP3K1   | 4214   | Leukemia, MESH:D015470 | Calcitriol C | 26.93 | 23  |
| TUBB6    | 84617  | Leukemia, MESH:D015470 | Calcitriol C | 26.93 | 21  |
| PCK2     | 5106   | Leukemia, MESH:D015470 | Arsenic Tr   | 26.92 | 37  |
| GSTA3    | 2940   | Leukemia, MESH:D015470 | 15-deoxy-    | 26.91 | 44  |
| NPPB     | 4879   | Leukemia, MESH:D004915 | Cytarabine   | 26.91 | 4   |
| ASB2     | 51676  | Leukemia, MESH:D015470 | Azacitidine  | 26.9  | 18  |
| CLEC2D   | 29121  | Leukemia, MESH:D015470 | Arsenic Tr   | 26.9  | 20  |
| HERC6    | 55008  | Leukemia, MESH:D015470 | Decitabine   | 26.9  | 26  |
| HNF1B    | 6928   | Leukemia, MESH:D015470 | Dexameth     | 26.9  | 14  |
| ITPK1    | 3705   | Leukemia, MESH:D015470 | Dexameth     | 26.9  | 16  |
| KIF3A    | 11127  | Leukemia, MESH:D015470 | Arsenic Tr   | 26.9  | 22  |
| MXRA7    | 439921 | Leukemia, MESH:D015470 | Arsenic Tr   | 26.9  | 87  |
| MYO6     | 4646   | Leukemia, MESH:D015470 | Arsenic Tr   | 26.9  | 23  |
| NPHS2    | 7827   | Leukemia, MESH:D015470 | Arsenic Tr   | 26.9  | 23  |
| PAIP1    | 10605  | Leukemia, MESH:D015470 | Cyclophos    | 26.9  | 19  |
| PILRA    | 29992  | Leukemia, MESH:D015470 | Arsenic Tr   | 26.9  | 21  |
| THBS1    | 7057   | Leukemia, MESH:D015473 | arsenite C   | 26.9  | 161 |
| TMEM47   | 83604  | Leukemia, MESH:D015470 | Decitabine   | 26.9  | 39  |
| UNG      | 7374   | Leukemia, MESH:D015473 | arsenite C   | 26.88 | 159 |
| BRINP1   | 1620   | Leukemia, MESH:D015473 | Arsenic Tr   | 26.87 | 263 |
| ACSL5    | 51703  | Leukemia, MESH:D015470 | Bezafibrat   | 26.86 | 20  |
| AQP3     | 360    | Leukemia, MESH:D015470 | Arsenic Tr   | 26.86 | 29  |
| CENPU    | 79682  | Leukemia, MESH:D015473 | Calcitriol C | 26.86 | 157 |
| CXCL3    | 2921   | Leukemia, MESH:D015470 | Calcitriol C | 26.86 | 21  |
| DLL1     | 28514  | Leukemia, MESH:D015470 | Benzene C    | 26.86 | 33  |
| ENG      | 2022   | Leukemia, MESH:D015470 | Arsenic Tr   | 26.86 | 56  |
| EREG     | 2069   | Leukemia, MESH:D015470 | Air Polluta  | 26.86 | 30  |
| FANCA    | 2175   | Leukemia, MESH:D015473 | Arsenic Ar   | 26.86 | 267 |
| KCNJ8    | 3764   | Leukemia, MESH:D015470 | Decitabine   | 26.86 | 24  |
| RSAD2    | 91543  | Leukemia, MESH:D015470 | Calcitriol C | 26.86 | 22  |
| SLC25A20 | 788    | Leukemia, MESH:D015470 | Air Polluta  | 26.86 | 19  |
| TYROBP   | 7305   | Leukemia, MESH:D015473 | Calcitriol C | 26.86 | 160 |
| BECN1    | 8678   | Leukemia, MESH:D015473 | Arsenic Ar   | 26.83 | 269 |
| SLC7A11  | 23657  | Leukemia, MESH:D015473 | alpha-Toc    | 26.83 | 267 |
| SMAD7    | 4092   | Leukemia, MESH:D015473 | Arsenic Ca   | 26.83 | 159 |

|         |        |                            |              |       |     |
|---------|--------|----------------------------|--------------|-------|-----|
| SPHK1   | 8877   | Leukemia, MESH:D015473     | Arseniclar:  | 26.83 | 165 |
| SYTL3   | 94120  | Leukemia, MESH:D015470     | Calcitriol[C | 26.83 | 19  |
| TMEM267 | 64417  | Leukemia, MESH:D015470     | Arsenic Tr   | 26.83 | 23  |
| ZNF703  | 80139  | Leukemia, MESH:D015470     | Doxorubic    | 26.83 | 17  |
| ATF6    | 22926  | Leukemia, MESH:D015473     | Arsenic[Ar   | 26.82 | 268 |
| HMOX1   | 3162   | Leukemia, MESH:D015473     | alpha-Toc    | 26.79 | 273 |
| FAM43A  | 131583 | Leukemia, MESH:D015473     | Arseniclar:  | 26.78 | 160 |
| KYNU    | 8942   | Leukemia, MESH:D015470     | Arsenic Tr   | 26.78 | 92  |
| SIK1    | 150094 | Leukemia, MESH:D015470     | Air Polluta  | 26.78 | 20  |
| WFDC2   | 10406  | Leukemia, MESH:D015473     | Arsenic[Ca   | 26.78 | 159 |
| IFI30   | 10437  | Leukemia, MESH:D01marker/m | Decitabine   | 26.77 | 21  |
| AGPAT4  | 56895  | Leukemia, MESH:D015470     | Arsenic Tr   | 26.77 | 22  |
| AKAP9   | 10142  | Leukemia, MESH:D015470     | Arsenic Tr   | 26.77 | 21  |
| ASL     | 435    | Leukemia, MESH:D015470     | Arsenic Tr   | 26.77 | 19  |
| ECM1    | 1893   | Leukemia, MESH:D015470     | Arsenic Tr   | 26.77 | 25  |
| EIF4E   | 1977   | Leukemia, MESH:D015473     | Arsenic Tr   | 26.77 | 264 |
| FBXL20  | 84961  | Leukemia, MESH:D015470     | Decitabine   | 26.77 | 25  |
| FHL2    | 2274   | Leukemia, MESH:D015473     | Arsenic Tr   | 26.77 | 264 |
| GDNF    | 2668   | Leukemia, MESH:D015473     | Arsenic[Ar   | 26.77 | 266 |
| H4C8    | 8365   | Leukemia, MESH:D015470     | Arsenic Tr   | 26.77 | 22  |
| IL32    | 9235   | Leukemia, MESH:D015470     | Calcitriol[C | 26.77 | 24  |
| IL6R    | 3570   | Leukemia, MESH:D015473     | Arseniclar:  | 26.77 | 164 |
| KIF21B  | 23046  | Leukemia, MESH:D015470     | Arsenic Tr   | 26.77 | 21  |
| LRPAP1  | 4043   | Leukemia, MESH:D015470     | Arsenic Tr   | 26.77 | 22  |
| NDUFS5  | 4725   | Leukemia, MESH:D015470     | Doxorubic    | 26.77 | 28  |
| OXTR    | 5021   | Leukemia, MESH:D015470     | Azacitidine  | 26.77 | 28  |
| PRKAR1A | 5573   | Leukemia, MESH:D015470     | Androgen     | 26.77 | 23  |
| PTH1R   | 5745   | Leukemia, MESH:D015470     | Benzene[C    | 26.77 | 95  |
| SMYD3   | 64754  | Leukemia, MESH:D015470     | Arsenic Tr   | 26.77 | 28  |
| SNRPF   | 6636   | Leukemia, MESH:D015470     | Arsenic Tr   | 26.77 | 16  |
| TOB2    | 10766  | Leukemia, MESH:D015470     | Dexameth     | 26.77 | 17  |
| DOK4    | 55715  | Leukemia, MESH:D015473     | Calcitriol[C | 26.75 | 157 |
| IGFBP2  | 3485   | Leukemia, MESH:D015470     | Alitretinoi  | 26.74 | 32  |
| CKS2    | 1164   | Leukemia, MESH:D015473     | Antimony     | 26.72 | 163 |
| TYMS    | 7298   | Leukemia, MESH:D004915     | Cytarabine   | 26.72 | 3   |
| ATRX    | 546    | Leukemia, MESH:D015470     | Benzene[C    | 26.71 | 49  |
| KLHL24  | 54800  | Leukemia, MESH:D015470     | Arsenic Tr   | 26.71 | 31  |
| ANTXR1  | 84168  | Leukemia, MESH:D015473     | Arsenic[Ar   | 26.7  | 262 |
| IFI6    | 2537   | Leukemia, MESH:D015473     | Arsenic Tr   | 26.7  | 262 |
| IRF6    | 3664   | Leukemia, MESH:D015473     | Arsenic Tr   | 26.7  | 264 |
| KCTD12  | 115207 | Leukemia, MESH:D015473     | Arsenic Tr   | 26.7  | 266 |
| NGEF    | 25791  | Leukemia, MESH:D015473     | Arseniclar:  | 26.7  | 25  |
| TGFB3   | 7043   | Leukemia, MESH:D015470     | Calcitriol[C | 26.68 | 18  |
| GSR     | 2936   | Leukemia, MESH:D015473     | alpha-Toc    | 26.67 | 269 |
| MFAP4   | 4239   | Leukemia, MESH:D015470     | Calcitriol[C | 26.67 | 85  |
| RET     | 5979   | Leukemia, MESH:D015473     | Arsenic[ca   | 26.67 | 159 |
| ROBO1   | 6091   | Leukemia, MESH:D015470     | Arsenic Tr   | 26.67 | 36  |
| SMOC1   | 64093  | Leukemia, MESH:D015470     | Dexameth     | 26.67 | 13  |
| ZNF600  | 162966 | Leukemia, MESH:D015470     | Arsenic Tr   | 26.67 | 20  |
| ZNF660  | 285349 | Leukemia, MESH:D015470     | Dexameth     | 26.67 | 14  |
| LITAF   | 9516   | Leukemia, MESH:D015473     | Arsenic[Ar   | 26.66 | 266 |
| ADAM22  | 53616  | Leukemia, MESH:D015470     | Calcitriol[C | 26.65 | 18  |
| APOL1   | 8542   | Leukemia, MESH:D015470     | Bortezomi    | 26.65 | 11  |
| BCO1    | 53630  | Leukemia, MESH:D015470     | Alitretinoi  | 26.65 | 16  |
| FXYD3   | 5349   | Leukemia, MESH:D015470     | Calcitriol[C | 26.65 | 12  |
| GATA1   | 2623   | Leukemia, MESH:D015470     | Aclarubici   | 26.65 | 28  |
| IPO13   | 9670   | Leukemia, MESH:D015470     | Calcitriol[C | 26.65 | 12  |
| PMEL    | 6490   | Leukemia, MESH:D015470     | Cytarabine   | 26.65 | 86  |

|          |        |                            |              |       |     |
|----------|--------|----------------------------|--------------|-------|-----|
| PPM1M    | 132160 | Leukemia, MESH:D015470     | Calcitriol C | 26.65 | 78  |
| SLC35F2  | 54733  | Leukemia, MESH:D015470     | Dexameth     | 26.65 | 24  |
| SLC9A9   | 285195 | Leukemia, MESH:D015470     | Dexameth     | 26.65 | 20  |
| TEX10    | 54881  | Leukemia, MESH:D015470     | Dexameth     | 26.65 | 14  |
| TEX261   | 113419 | Leukemia, MESH:D015470     | Arsenic Tr   | 26.65 | 24  |
| CORIN    | 10699  | Leukemia, MESH:D015473     | Arsenic Ar   | 26.63 | 268 |
| CEACAM6  | 4680   | Leukemia, MESH:D015473     | Arsenic Ca   | 26.62 | 160 |
| DHCR24   | 1718   | Leukemia, MESH:D015470     | Androgen     | 26.62 | 103 |
| IFRD1    | 3475   | Leukemia, MESH:D015470     | Arsenic Tr   | 26.62 | 39  |
| LIMCH1   | 22998  | Leukemia, MESH:D015473     | Arsenic Ca   | 26.62 | 159 |
| MT1A     | 4489   | Leukemia, MESH:D015473     | Arsenic Ar   | 26.62 | 179 |
| RP2      | 6102   | Leukemia, MESH:D015473     | Arsenic Ar   | 26.62 | 266 |
| ATXN1    | 6310   | Leukemia, MESH:D015470     | Daunorub     | 26.58 | 44  |
| CAVIN2   | 8436   | Leukemia, MESH:D015470     | Air Polluta  | 26.58 | 24  |
| HIGD1A   | 25994  | Leukemia, MESH:D015470     | Arsenic Tr   | 26.58 | 26  |
| MAP3K14  | 9020   | Leukemia, MESH:D015470     | Calcitriol C | 26.58 | 16  |
| MTHFD1   | 4522   | Leukemia, MESH:D015470     | Arsenic Tr   | 26.58 | 31  |
| NCOA7    | 135112 | Leukemia, MESH:D015470     | Arsenic Tr   | 26.58 | 26  |
| RECK     | 8434   | Leukemia, MESH:D015470     | Dasatinib    | 26.58 | 20  |
| TLR3     | 7098   | Leukemia, MESH:D007948     | 2-(2-amin    | 26.57 | 3   |
| NPM1     | 4869   | Leukemia, MESH:D01marker/m | Arsenic Ar   | 26.56 | 267 |
| IL1A     | 3552   | Leukemia, MESH:D015473     | alpha-Toc    | 26.56 | 268 |
| DBN1     | 1627   | Leukemia, MESH:D015473     | Arsenic Tr   | 26.55 | 264 |
| GAS7     | 8522   | Leukemia, MESH:D015473     | Arsenic Ar   | 26.55 | 266 |
| MTR      | 4548   | Leukemia, MESH:D015473     | Arsenic Ar   | 26.55 | 265 |
| TF       | 7018   | Leukemia, MESH:D015470     | Busulfan C   | 26.55 | 23  |
| ADM      | 133    | Leukemia, MESH:D015473     | Antimony     | 26.54 | 266 |
| AFF3     | 3899   | Leukemia, MESH:D015470     | Calcitriol C | 26.52 | 22  |
| CTTNBP2  | 55917  | Leukemia, MESH:D015470     | Arsenic Tr   | 26.52 | 23  |
| CYP2U1   | 113612 | Leukemia, MESH:D015470     | Bortezomi    | 26.52 | 18  |
| KBTBD11  | 9920   | Leukemia, MESH:D015470     | Arsenic Tr   | 26.52 | 16  |
| KDM6A    | 7403   | Leukemia, MESH:D015470     | Doxorubic    | 26.52 | 19  |
| NOP2     | 4839   | Leukemia, MESH:D015470     | Benzoates    | 26.52 | 15  |
| PKDCC    | 91461  | Leukemia, MESH:D015470     | Decitabine   | 26.52 | 22  |
| RNASE1   | 6035   | Leukemia, MESH:D015470     | Air Polluta  | 26.52 | 18  |
| RNF128   | 79589  | Leukemia, MESH:D015470     | Arsenic Tr   | 26.52 | 22  |
| SUB1     | 10923  | Leukemia, MESH:D015470     | Arsenic Tr   | 26.52 | 22  |
| TNFSF13B | 10673  | Leukemia, MESH:D015470     | Air Polluta  | 26.52 | 21  |
| TRIM6    | 117854 | Leukemia, MESH:D015470     | Calcitriol C | 26.52 | 78  |
| WDFY3    | 23001  | Leukemia, MESH:D015470     | Dexameth     | 26.52 | 19  |
| SFN      | 2810   | Leukemia, MESH:D015473     | Arsenic Ar   | 26.51 | 269 |
| LDHA     | 3939   | Leukemia, MESH:D015473     | alpha-Toc    | 26.5  | 268 |
| NOX4     | 50507  | Leukemia, MESH:D015473     | Arsenic Ar   | 26.5  | 271 |
| CDA      | 978    | Leukemia, MESH:D015470     | Calcitriol C | 26.49 | 19  |
| GPD1     | 2819   | Leukemia, MESH:D015470     | Arsenic Tr   | 26.49 | 22  |
| IL1R2    | 7850   | Leukemia, MESH:D015470     | Arsenic Tr   | 26.49 | 43  |
| KCNQ1    | 3784   | Leukemia, MESH:D015470     | Arsenic Tr   | 26.49 | 54  |
| LAMP2    | 3920   | Leukemia, MESH:D015470     | Chloroqui    | 26.49 | 20  |
| OXCT1    | 5019   | Leukemia, MESH:D015470     | Air Polluta  | 26.49 | 29  |
| PSMB4    | 5692   | Leukemia, MESH:D015470     | Air Polluta  | 26.49 | 25  |
| UBE2I    | 7329   | Leukemia, MESH:D015470     | Arsenic Tr   | 26.49 | 26  |
| WSB1     | 26118  | Leukemia, MESH:D015470     | Calcitriol C | 26.49 | 21  |
| AKAP9    | 10142  | Leukemia, MESH:D015473     | Arsenic Ar   | 26.47 | 268 |
| BLM      | 641    | Leukemia, MESH:D015473     | Arsenic Ar   | 26.47 | 161 |
| CLDN11   | 5010   | Leukemia, MESH:D015473     | Arsenic Ar   | 26.47 | 266 |
| COL8A1   | 1295   | Leukemia, MESH:D015473     | Arsenic Ar   | 26.47 | 159 |
| CYP1B1   | 1545   | Leukemia, MESH:D015473     | Antimony     | 26.47 | 271 |
| FCER1G   | 2207   | Leukemia, MESH:D015473     | Arsenic Tr   | 26.47 | 266 |

|          |        |                            |              |       |     |
|----------|--------|----------------------------|--------------|-------|-----|
| MIR142   | 406934 | Leukemia, MESH:D015470     | Air Polluta  | 26.47 | 34  |
| RASL10B  | 91608  | Leukemia, MESH:D015470     | Dexameth     | 26.47 | 15  |
| SPINK5   | 11005  | Leukemia, MESH:D015470     | (+)-JQ1 c    | 26.47 | 13  |
| SYNE3    | 161176 | Leukemia, MESH:D015470     | Dexameth     | 26.47 | 16  |
| TGFBR3   | 7049   | Leukemia, MESH:D015473     | Arsenic Tr   | 26.47 | 265 |
| CD55     | 1604   | Leukemia, MESH:D015473     | Arsenic Tr   | 26.45 | 265 |
| MGLL     | 11343  | Leukemia, MESH:D015470     | Bezafibrat   | 26.44 | 22  |
| GJB1     | 2705   | Leukemia, MESH:D015470     | Benzene C    | 26.42 | 35  |
| LIPG     | 9388   | Leukemia, MESH:D015470     | Bezafibrat   | 26.42 | 28  |
| SLC1A1   | 6505   | Leukemia, MESH:D015470     | Calcitriol C | 26.42 | 19  |
| ADCY7    | 113    | Leukemia, MESH:D01marker/m | Calcitriol C | 26.4  | 19  |
| ANAPC1   | 64682  | Leukemia, MESH:D015470     | Dexameth     | 26.4  | 19  |
| CALB1    | 793    | Leukemia, MESH:D015470     | Calcitriol C | 26.4  | 80  |
| DAPK2    | 23604  | Leukemia, MESH:D015470     | Arsenic Tr   | 26.4  | 27  |
| DDR2     | 4921   | Leukemia, MESH:D015470     | Arsenic Tr   | 26.4  | 89  |
| ECHDC2   | 55268  | Leukemia, MESH:D015470     | Decitabine   | 26.4  | 24  |
| EIF4A2   | 1974   | Leukemia, MESH:D015470     | Benzene C    | 26.4  | 35  |
| FANCC    | 2176   | Leukemia, MESH:D015470     | Arsenic Tr   | 26.4  | 25  |
| GHR      | 2690   | Leukemia, MESH:D015473     | arsenite ca  | 26.4  | 161 |
| HNRNPA3  | 220988 | Leukemia, MESH:D015470     | Cytarabine   | 26.4  | 83  |
| KIF1B    | 23095  | Leukemia, MESH:D015470     | Benzene C    | 26.4  | 31  |
| LACTB2   | 51110  | Leukemia, MESH:D015470     | Air Polluta  | 26.4  | 21  |
| LARP7    | 51574  | Leukemia, MESH:D015470     | Decitabine   | 26.4  | 23  |
| NDST1    | 3340   | Leukemia, MESH:D015470     | Arsenic Tr   | 26.4  | 18  |
| OLFML2A  | 169611 | Leukemia, MESH:D015470     | Arsenic Tr   | 26.4  | 21  |
| POLR3E   | 55718  | Leukemia, MESH:D015470     | Air Polluta  | 26.4  | 20  |
| PPIF     | 10105  | Leukemia, MESH:D015470     | Arsenic Tr   | 26.4  | 25  |
| PPP3CB   | 5532   | Leukemia, MESH:D015470     | Arsenic Tr   | 26.4  | 36  |
| ST3GAL4  | 6484   | Leukemia, MESH:D015470     | Benzoates    | 26.4  | 16  |
| TLE2     | 7089   | Leukemia, MESH:D015470     | Arsenic Tr   | 26.4  | 21  |
| TMEFF2   | 23671  | Leukemia, MESH:D015470     | Air Polluta  | 26.4  | 16  |
| WWC1     | 23286  | Leukemia, MESH:D015470     | Arsenic Tr   | 26.4  | 22  |
| C9ORF85  | 138241 | Leukemia, MESH:D015470     | Bortezomi    | 26.39 | 14  |
| FANCI    | 55215  | Leukemia, MESH:D015473     | arsenite Ci  | 26.39 | 158 |
| MERTK    | 10461  | Leukemia, MESH:D015473     | arsenic dis  | 26.39 | 267 |
| MFAP4    | 4239   | Leukemia, MESH:D015473     | Calcitriol C | 26.39 | 157 |
| RARRES1  | 5918   | Leukemia, MESH:D015473     | Arsenic Ca   | 26.39 | 159 |
| ZNF438   | 220929 | Leukemia, MESH:D015470     | Dexameth     | 26.39 | 15  |
| ZPLD1    | 131368 | Leukemia, MESH:D015470     | Dexameth     | 26.39 | 14  |
| ANXA1    | 301    | Leukemia, MESH:D015473     | Arsenic Ar   | 26.38 | 268 |
| C3ORF38  | 285237 | Leukemia, MESH:D015470     | Dexameth     | 26.38 | 14  |
| CRYAB    | 1410   | Leukemia, MESH:D015473     | Arsenic Ar   | 26.38 | 270 |
| FAM171A: | 221061 | Leukemia, MESH:D015473     | Arsenic ars  | 26.38 | 157 |
| NOC2L    | 26155  | Leukemia, MESH:D015473     | Arsenic De   | 26.38 | 158 |
| NR0B2    | 8431   | Leukemia, MESH:D015470     | 2-(2-chlor   | 26.36 | 20  |
| BUB1     | 699    | Leukemia, MESH:D015473     | arsenite Ci  | 26.35 | 157 |
| HBEGF    | 1839   | Leukemia, MESH:D015473     | Arsenic Tr   | 26.35 | 263 |
| ID1      | 3397   | Leukemia, MESH:D015473     | Antimony     | 26.35 | 266 |
| PLA2G2A  | 5320   | Leukemia, MESH:D015470     | Decitabine   | 26.35 | 23  |
| SLC29A1  | 2030   | Leukemia, MESH:D015470     | Arsenic Tr   | 26.35 | 91  |
| SLC6A9   | 6536   | Leukemia, MESH:D015470     | Arsenic Tr   | 26.35 | 26  |
| MIR21    | 406991 | Leukemia, MESH:D007948     | 2-(2-amin    | 26.34 | 3   |
| MAP3K14  | 9020   | Leukemia, MESH:D015473     | arsenite Ci  | 26.32 | 158 |
| POLD1    | 5424   | Leukemia, MESH:D015473     | Arsenic Ar   | 26.32 | 265 |
| IL17A    | 3605   | Leukemia, MESH:D01marker/m | Arsenic Ar   | 26.31 | 165 |
| ABHD2    | 11057  | Leukemia, MESH:D015470     | Bortezomi    | 26.31 | 20  |
| DUSP6    | 1848   | Leukemia, MESH:D015470     | Azacitidine  | 26.31 | 28  |
| XPA      | 7507   | Leukemia, MESH:D015470     | Arsenic Tr   | 26.31 | 39  |

|          |        |                        |              |       |     |
|----------|--------|------------------------|--------------|-------|-----|
| CD74     | 972    | Leukemia, MESH:D015473 | Arsenic Tr   | 26.3  | 267 |
| DHX33    | 56919  | Leukemia, MESH:D015470 | Dexameth     | 26.29 | 17  |
| DUS2     | 54920  | Leukemia, MESH:D015470 | Arsenic Tr   | 26.29 | 21  |
| FBXW5    | 54461  | Leukemia, MESH:D015470 | Dexameth     | 26.29 | 10  |
| KDM5C    | 8242   | Leukemia, MESH:D015470 | Bortezomi    | 26.29 | 22  |
| MAP3K10  | 4294   | Leukemia, MESH:D015470 | Calcitriol C | 26.29 | 14  |
| RBM7     | 10179  | Leukemia, MESH:D015470 | Dexameth     | 26.29 | 15  |
| ANXA8    | 653145 | Leukemia, MESH:D015470 | Cytarabine   | 26.28 | 79  |
| IRX3     | 79191  | Leukemia, MESH:D015470 | Calcitriol C | 26.28 | 23  |
| ITGB3BP  | 23421  | Leukemia, MESH:D015470 | Arsenic Tr   | 26.28 | 19  |
| PPP3CA   | 5530   | Leukemia, MESH:D015470 | Arsenic Tr   | 26.28 | 26  |
| PRR5L    | 79899  | Leukemia, MESH:D015470 | Air Polluta  | 26.28 | 18  |
| RIPOR2   | 9750   | Leukemia, MESH:D015470 | Air Polluta  | 26.28 | 18  |
| SLC27A3  | 11000  | Leukemia, MESH:D015470 | Dexameth     | 26.28 | 24  |
| TMCC3    | 57458  | Leukemia, MESH:D015470 | Calcitriol C | 26.28 | 15  |
| VRK1     | 7443   | Leukemia, MESH:D015470 | Calcitriol C | 26.28 | 14  |
| WNT5B    | 81029  | Leukemia, MESH:D015470 | Alitretinoi  | 26.28 | 13  |
| IER3     | 8870   | Leukemia, MESH:D015473 | Arsenic ar   | 26.27 | 166 |
| NOX1     | 27035  | Leukemia, MESH:D007948 | 2-(2-amin    | 26.27 | 3   |
| VCPIP1   | 80124  | Leukemia, MESH:D015473 | Arsenic Ar   | 26.26 | 263 |
| CDK5     | 1020   | Leukemia, MESH:D015473 | alvocidib    | 26.25 | 267 |
| KCNQ1    | 3784   | Leukemia, MESH:D015473 | Arsenic Ar   | 26.25 | 270 |
| UBE2I    | 7329   | Leukemia, MESH:D015473 | Arsenic Ar   | 26.25 | 262 |
| JAK1     | 3716   | Leukemia, MESH:D015473 | Arsenic Ar   | 26.24 | 271 |
| PLAUR    | 5329   | Leukemia, MESH:D015473 | Arsenic Ar   | 26.23 | 268 |
| ADD3     | 120    | Leukemia, MESH:D015470 | Dexameth     | 26.22 | 18  |
| DEPTOR   | 64798  | Leukemia, MESH:D015470 | Cytarabine   | 26.22 | 82  |
| TPP1     | 1200   | Leukemia, MESH:D015470 | Arsenic Tr   | 26.22 | 43  |
| UQCRC1   | 7384   | Leukemia, MESH:D015470 | Air Polluta  | 26.22 | 18  |
| GRIA1    | 2890   | Leukemia, MESH:D015470 | Arsenic Tr   | 26.21 | 24  |
| HPRT1    | 3251   | Leukemia, MESH:D015470 | 1-(2-hydr    | 26.21 | 21  |
| MAP2K2   | 5605   | Leukemia, MESH:D015470 | 2-(2-chlor   | 26.21 | 31  |
| PARP1    | 142    | Leukemia, MESH:D004915 | Cytarabine   | 26.21 | 4   |
| SERPINH1 | 871    | Leukemia, MESH:D015470 | Arsenic Tr   | 26.21 | 92  |
| DGAT2    | 84649  | Leukemia, MESH:D015473 | Buthionine   | 26.19 | 155 |
| EFNA1    | 1942   | Leukemia, MESH:D015473 | Arsenic Ar   | 26.19 | 268 |
| APOE     | 348    | Leukemia, MESH:D015473 | alpha-Toc    | 26.18 | 267 |
| EIF4A2   | 1974   | Leukemia, MESH:D015473 | Arsenic Ca   | 26.17 | 164 |
| STAT4    | 6775   | Leukemia, MESH:D015473 | Arsenic Ar   | 26.17 | 161 |
| HOXB9    | 3219   | Leukemia, MESH:D015470 | Arsenic Tr   | 26.16 | 20  |
| KMT5B    | 51111  | Leukemia, MESH:D015470 | Air Polluta  | 26.16 | 19  |
| MADD     | 8567   | Leukemia, MESH:D015470 | Dexameth     | 26.16 | 17  |
| MNS1     | 55329  | Leukemia, MESH:D015470 | Calcitriol C | 26.16 | 14  |
| PKIA     | 5569   | Leukemia, MESH:D015470 | Bortezomi    | 26.16 | 83  |
| PLEKHA5  | 54477  | Leukemia, MESH:D015470 | Dexameth     | 26.16 | 19  |
| POLH     | 5429   | Leukemia, MESH:D015470 | Air Polluta  | 26.16 | 13  |
| S100A1   | 6271   | Leukemia, MESH:D015470 | Alitretinoi  | 26.16 | 17  |
| SLA      | 6503   | Leukemia, MESH:D015470 | Arsenic Tr   | 26.16 | 92  |
| SLC17A5  | 26503  | Leukemia, MESH:D015470 | Benzene C    | 26.16 | 26  |
| STAMBPL1 | 57559  | Leukemia, MESH:D015470 | Air Polluta  | 26.16 | 20  |
| TMTC1    | 83857  | Leukemia, MESH:D015470 | Arsenic Tr   | 26.16 | 21  |
| TNFRSF14 | 8764   | Leukemia, MESH:D015470 | Arsenic Tr   | 26.16 | 29  |
| CETP     | 1071   | Leukemia, MESH:D015473 | Arsenic Tr   | 26.15 | 261 |
| FAM111B  | 374393 | Leukemia, MESH:D015473 | Calcitriol C | 26.15 | 156 |
| FOXO1    | 2308   | Leukemia, MESH:D015473 | Arsenic Tr   | 26.15 | 265 |
| IRX4     | 50805  | Leukemia, MESH:D015473 | Calcitriol C | 26.15 | 157 |
| NR0B2    | 8431   | Leukemia, MESH:D015473 | 2-(2-chlor   | 26.15 | 158 |
| SCAMP5   | 192683 | Leukemia, MESH:D015473 | Arsenic Ar   | 26.15 | 171 |

|          |        |                        |              |       |     |
|----------|--------|------------------------|--------------|-------|-----|
| ACSL4    | 2182   | Leukemia, MESH:D015470 | Bezafibrat   | 26.14 | 23  |
| CYB5R2   | 51700  | Leukemia, MESH:D015473 | Arsenic Tr   | 26.14 | 265 |
| FGFR3    | 2261   | Leukemia, MESH:D015473 | Antimony     | 26.14 | 161 |
| HSPA6    | 3310   | Leukemia, MESH:D015470 | Arsenic Tr   | 26.14 | 93  |
| IGF2R    | 3482   | Leukemia, MESH:D015470 | Arsenic Tr   | 26.14 | 25  |
| LDHB     | 3945   | Leukemia, MESH:D015470 | Arsenic Tr   | 26.14 | 26  |
| PLG      | 5340   | Leukemia, MESH:D015470 | Arsenic Tr   | 26.14 | 104 |
| PRSS23   | 11098  | Leukemia, MESH:D015470 | Calcitriol C | 26.14 | 19  |
| ESD      | 2098   | Leukemia, MESH:D015470 | Arsenic Tr   | 26.13 | 25  |
| NID1     | 4811   | Leukemia, MESH:D015470 | Cyclophos    | 26.13 | 20  |
| AKAP10   | 11216  | Leukemia, MESH:D015470 | Dexameth     | 26.12 | 18  |
| ATP6V0E1 | 8992   | Leukemia, MESH:D015470 | Bortezomi    | 26.12 | 19  |
| GPR157   | 80045  | Leukemia, MESH:D015470 | Bortezomi    | 26.12 | 16  |
| MCMBP    | 79892  | Leukemia, MESH:D015470 | Air Polluta  | 26.12 | 13  |
| MSI1     | 4440   | Leukemia, MESH:D015470 | Arsenic Tr   | 26.12 | 28  |
| RC3H1    | 149041 | Leukemia, MESH:D015470 | Cyclophos    | 26.12 | 16  |
| TMBIM4   | 51643  | Leukemia, MESH:D015470 | Arsenic Tr   | 26.12 | 28  |
| ZC3H7B   | 23264  | Leukemia, MESH:D015470 | Arsenic Tr   | 26.12 | 21  |
| BTN3A3   | 10384  | Leukemia, MESH:D015470 | Arsenic Tr   | 26.11 | 19  |
| PRIMPOL  | 201973 | Leukemia, MESH:D015470 | Calcitriol C | 26.11 | 9   |
| MELK     | 9833   | Leukemia, MESH:D015473 | arsenite Ci  | 26.1  | 157 |
| CSF1R    | 1436   | Leukemia, MESH:D015473 | Calcitriol C | 26.09 | 156 |
| CTSK     | 1513   | Leukemia, MESH:D015473 | Arsenic ca   | 26.09 | 159 |
| G6PD     | 2539   | Leukemia, MESH:D015473 | Antimony     | 26.09 | 267 |
| MGP      | 4256   | Leukemia, MESH:D015473 | Arsenic Tr   | 26.09 | 265 |
| UCHL1    | 7345   | Leukemia, MESH:D015473 | Arsenic Ar   | 26.09 | 268 |
| ALDH2    | 217    | Leukemia, MESH:D015470 | Benzene C    | 26.07 | 51  |
| CS       | 1431   | Leukemia, MESH:D015470 | Chloroqui    | 26.07 | 28  |
| CXCL1    | 2919   | Leukemia, MESH:D015473 | alpha-Toc    | 26.07 | 163 |
| DAB2     | 1601   | Leukemia, MESH:D015470 | Arsenic Tr   | 26.07 | 93  |
| GRN      | 2896   | Leukemia, MESH:D015470 | Arsenic Tr   | 26.07 | 26  |
| MAP1LC3  | 81631  | Leukemia, MESH:D015473 | Arsenic Ar   | 26.06 | 268 |
| LPAR1    | 1902   | Leukemia, MESH:D015470 | Calcitriol C | 26.04 | 26  |
| B3GNT5   | 84002  | Leukemia, MESH:D015470 | Dexameth     | 26.04 | 20  |
| CLSTN1   | 22883  | Leukemia, MESH:D015470 | Arsenic Tr   | 26.04 | 18  |
| CYP27B1  | 1594   | Leukemia, MESH:D015470 | Calcitriol C | 26.04 | 25  |
| ECH1     | 1891   | Leukemia, MESH:D015473 | Arsenic Tr   | 26.04 | 261 |
| FGF19    | 9965   | Leukemia, MESH:D015473 | Arsenic Cr   | 26.04 | 154 |
| GARS1    | 2617   | Leukemia, MESH:D015470 | Arsenic Tr   | 26.04 | 17  |
| HDAC5    | 10014  | Leukemia, MESH:D015470 | Decitabine   | 26.04 | 25  |
| HPSE     | 10855  | Leukemia, MESH:D015470 | Air Polluta  | 26.04 | 25  |
| ITGB6    | 3694   | Leukemia, MESH:D015470 | Bortezomi    | 26.04 | 17  |
| MBD1     | 4152   | Leukemia, MESH:D015470 | Bortezomi    | 26.04 | 22  |
| MDN1     | 23195  | Leukemia, MESH:D015470 | Dexameth     | 26.04 | 19  |
| MICAL1   | 64780  | Leukemia, MESH:D015470 | Calcitriol C | 26.04 | 11  |
| MYD88    | 4615   | Leukemia, MESH:D015473 | Arsenic Ar   | 26.04 | 270 |
| STAT2    | 6773   | Leukemia, MESH:D015470 | Air Polluta  | 26.04 | 17  |
| SYNE1    | 23345  | Leukemia, MESH:D015470 | Dexameth     | 26.04 | 15  |
| TCOF1    | 6949   | Leukemia, MESH:D015470 | Calcitriol C | 26.04 | 21  |
| TIGAR    | 57103  | Leukemia, MESH:D015470 | Arsenic Tr   | 26.04 | 27  |
| CASQ2    | 845    | Leukemia, MESH:D015473 | Arsenic ar   | 26.03 | 158 |
| CHI3L1   | 1116   | Leukemia, MESH:D015473 | Arsenic Tr   | 26.03 | 262 |
| EGFL6    | 25975  | Leukemia, MESH:D015473 | Arsenic Tr   | 26.03 | 264 |
| ESYT1    | 23344  | Leukemia, MESH:D015473 | Arsenic Tr   | 26.03 | 262 |
| NCOA6    | 23054  | Leukemia, MESH:D015473 | arsenite D   | 26.03 | 159 |
| PKNOX2   | 63876  | Leukemia, MESH:D015473 | Arsenic Ar   | 26.03 | 262 |
| RIPK2    | 8767   | Leukemia, MESH:D015473 | Calcitriol C | 26.03 | 153 |
| SPON1    | 10418  | Leukemia, MESH:D015473 | Arsenic Tr   | 26.03 | 266 |

|         |        |                            |              |       |     |
|---------|--------|----------------------------|--------------|-------|-----|
| SULF1   | 23213  | Leukemia, MESH:D015473     | Arsenic Ar   | 26.03 | 264 |
| DUSP1   | 1843   | Leukemia, MESH:D015473     | Antimony     | 26.01 | 162 |
| GPAM    | 57678  | Leukemia, MESH:D015470     | Air Polluta  | 26    | 23  |
| RORC    | 6097   | Leukemia, MESH:D015470     | Bortezomi    | 26    | 27  |
| ZFAND2A | 90637  | Leukemia, MESH:D015470     | Bortezomi    | 26    | 21  |
| AHR     | 196    | Leukemia, MESH:D015473     | 2-(2-chlor   | 25.99 | 267 |
| CDC6    | 990    | Leukemia, MESH:D015473     | Arsenic Tr   | 25.99 | 265 |
| CYP24A1 | 1591   | Leukemia, MESH:D015473     | Arsenic Tr   | 25.99 | 267 |
| FGFR2   | 2263   | Leukemia, MESH:D015470     | Arsenic Tr   | 25.99 | 46  |
| FN1     | 2335   | Leukemia, MESH:D015473     | alpha-Toc    | 25.99 | 267 |
| HSPA5   | 3309   | Leukemia, MESH:D015473     | Arsenic ar:  | 25.99 | 269 |
| TGFB1   | 7045   | Leukemia, MESH:D015473     | Arsenic ar:  | 25.99 | 161 |
| SREBF1  | 6720   | Leukemia, MESH:D015473     | Arsenic Ar   | 25.97 | 266 |
| CTNNA1  | 1495   | Leukemia, MESH:D01marker/m | Arsenic Tr   | 25.95 | 33  |
| ACTR1A  | 10121  | Leukemia, MESH:D015470     | Dexameth     | 25.95 | 17  |
| ADAT2   | 134637 | Leukemia, MESH:D015470     | Air Polluta  | 25.95 | 13  |
| AEN     | 64782  | Leukemia, MESH:D015470     | Arsenic Tr   | 25.95 | 22  |
| BRIX1   | 55299  | Leukemia, MESH:D015470     | Calcitriol C | 25.95 | 10  |
| DENND2A | 27147  | Leukemia, MESH:D015470     | Dexameth     | 25.95 | 14  |
| DSC3    | 1825   | Leukemia, MESH:D015470     | Calcitriol C | 25.95 | 87  |
| IKZF3   | 22806  | Leukemia, MESH:D015470     | Decitabine   | 25.95 | 16  |
| INAVA   | 55765  | Leukemia, MESH:D015470     | Calcitriol C | 25.95 | 16  |
| IQCK    | 124152 | Leukemia, MESH:D015470     | Dronabinc    | 25.95 | 12  |
| LOXL2   | 4017   | Leukemia, MESH:D015470     | Decitabine   | 25.95 | 25  |
| MTSS1   | 9788   | Leukemia, MESH:D015470     | Calcitriol C | 25.95 | 24  |
| NOL4L   | 140688 | Leukemia, MESH:D015470     | Calcitriol C | 25.95 | 18  |
| PATZ1   | 23598  | Leukemia, MESH:D015470     | Bortezomi    | 25.95 | 17  |
| PDZD8   | 118987 | Leukemia, MESH:D015470     | Dexameth     | 25.95 | 15  |
| PLCG2   | 5336   | Leukemia, MESH:D015470     | Arsenic Tr   | 25.95 | 29  |
| PNMA2   | 10687  | Leukemia, MESH:D015470     | Decitabine   | 25.95 | 23  |
| PRR16   | 51334  | Leukemia, MESH:D015470     | Arsenic Tr   | 25.95 | 20  |
| RPS6KA1 | 6195   | Leukemia, MESH:D015470     | 15-deoxy-    | 25.95 | 18  |
| TIMP1   | 7076   | Leukemia, MESH:D007948     | 2-(2-amin    | 25.95 | 4   |
| ZYG11B  | 79699  | Leukemia, MESH:D015470     | Dexameth     | 25.95 | 15  |
| NUMA1   | 4926   | Leukemia, MESH:D015470     | Arsenic Tr   | 25.93 | 26  |
| RELN    | 5649   | Leukemia, MESH:D015470     | Bezafibrat   | 25.93 | 87  |
| ABCA3   | 21     | Leukemia, MESH:D015470     | Arsenic Tr   | 25.92 | 25  |
| ACIN1   | 22985  | Leukemia, MESH:D015470     | Air Polluta  | 25.92 | 18  |
| C1QTNF6 | 114904 | Leukemia, MESH:D015470     | Air Polluta  | 25.92 | 21  |
| EPB41L2 | 2037   | Leukemia, MESH:D015470     | Arsenic Tr   | 25.92 | 31  |
| INPP1   | 3628   | Leukemia, MESH:D015470     | Arsenic Tr   | 25.92 | 39  |
| MAMDC2  | 256691 | Leukemia, MESH:D015470     | Arsenic Tr   | 25.92 | 23  |
| RNF144A | 9781   | Leukemia, MESH:D015473     | Arsenic Ar   | 25.92 | 164 |
| RNF213  | 57674  | Leukemia, MESH:D015470     | Doxorubic    | 25.92 | 19  |
| SOX6    | 55553  | Leukemia, MESH:D015470     | Dexameth     | 25.92 | 17  |
| STK38L  | 23012  | Leukemia, MESH:D015473     | Arsenic Ar   | 25.92 | 266 |
| TYK2    | 7297   | Leukemia, MESH:D015470     | Arsenic Tr   | 25.92 | 25  |
| USP36   | 57602  | Leukemia, MESH:D015470     | Air Polluta  | 25.92 | 13  |
| XRCC4   | 7518   | Leukemia, MESH:D015470     | Arsenic Tr   | 25.92 | 30  |
| RBL1    | 5933   | Leukemia, MESH:D015473     | alvocidib    | 25.89 | 263 |
| KNL1    | 57082  | Leukemia, MESH:D015473     | arsenite C   | 25.88 | 158 |
| POLA1   | 5422   | Leukemia, MESH:D015470     | Dasatinib    | 25.87 | 28  |
| SRM     | 6723   | Leukemia, MESH:D015470     | Calcitriol C | 25.87 | 21  |
| EIF2S1  | 1965   | Leukemia, MESH:D015473     | Arsenic Ar   | 25.86 | 269 |
| IL23A   | 51561  | Leukemia, MESH:D015470     | Air Polluta  | 25.86 | 29  |
| NRF1    | 4899   | Leukemia, MESH:D015470     | Arsenic Tr   | 25.86 | 25  |
| TGM5    | 9333   | Leukemia, MESH:D015473     | Arsenic Ge   | 25.86 | 161 |
| RSPH3   | 83861  | Leukemia, MESH:D015470     | Doxorubic    | 25.85 | 15  |

|          |        |                            |              |       |     |
|----------|--------|----------------------------|--------------|-------|-----|
| FSHB     | 2488   | Leukemia, MESH:D015470     | 2-(2-chlor   | 25.84 | 27  |
| GPNUMB   | 10457  | Leukemia, MESH:D015473     | Arsenic Ar   | 25.84 | 264 |
| TNFRSF10 | 8797   | Leukemia, MESH:D015473     | alvocidib /  | 25.84 | 267 |
| FBLN5    | 10516  | Leukemia, MESH:D015473     | Arsenic Tr   | 25.82 | 261 |
| BUB3     | 9184   | Leukemia, MESH:D015473     | arsenite D   | 25.81 | 158 |
| CARD10   | 29775  | Leukemia, MESH:D015470     | Calcitriol E | 25.81 | 19  |
| COL4A6   | 1288   | Leukemia, MESH:D015470     | Decitabine   | 25.81 | 22  |
| DNMBP    | 23268  | Leukemia, MESH:D015473     | Arsenic Ar   | 25.81 | 162 |
| FAM210B  | 116151 | Leukemia, MESH:D015470     | Dexameth     | 25.81 | 11  |
| RECQL4   | 9401   | Leukemia, MESH:D015470     | Bortezomi    | 25.81 | 17  |
| SLC25A19 | 60386  | Leukemia, MESH:D015473     | Arsenic Ca   | 25.81 | 159 |
| SLC7A7   | 9056   | Leukemia, MESH:D015473     | Arsenic Ca   | 25.81 | 162 |
| ST3GAL5  | 8869   | Leukemia, MESH:D015473     | Arsenic ar:  | 25.81 | 160 |
| TENM2    | 57451  | Leukemia, MESH:D015470     | Arsenic Tr   | 25.81 | 25  |
| TRIM63   | 84676  | Leukemia, MESH:D015470     | Arsenic Tr   | 25.81 | 24  |
| ALDOC    | 230    | Leukemia, MESH:D015473     | Antimony     | 25.79 | 262 |
| ANKRD6   | 22881  | Leukemia, MESH:D015470     | Arsenic Tr   | 25.79 | 17  |
| ARMC8    | 25852  | Leukemia, MESH:D015470     | Arsenic Tr   | 25.79 | 24  |
| ATP5A1   | 11946  | Leukemia, MESH:D015470     | Arsenic Tr   | 25.79 | 30  |
| ERLIN1   | 10613  | Leukemia, MESH:D015470     | Air Polluta  | 25.79 | 16  |
| GLS      | 2744   | Leukemia, MESH:D015473     | Arsenic Ar   | 25.79 | 266 |
| GPATCH2  | 55105  | Leukemia, MESH:D015470     | Air Polluta  | 25.79 | 17  |
| HSPB8    | 26353  | Leukemia, MESH:D015473     | Antimony     | 25.79 | 265 |
| LIX1L    | 128077 | Leukemia, MESH:D015470     | Arsenic Tr   | 25.79 | 28  |
| MTREX    | 23517  | Leukemia, MESH:D015470     | Arsenic Tr   | 25.79 | 23  |
| SH2D3C   | 10044  | Leukemia, MESH:D015470     | Air Polluta  | 25.79 | 23  |
| STYX     | 6815   | Leukemia, MESH:D015470     | Arsenic Tr   | 25.79 | 17  |
| ZNF827   | 152485 | Leukemia, MESH:D015470     | Decitabine   | 25.79 | 24  |
| ATAD2    | 29028  | Leukemia, MESH:D015470     | Arsenic Tr   | 25.78 | 26  |
| NAP1L1   | 4673   | Leukemia, MESH:D015470     | Arsenic Tr   | 25.78 | 30  |
| TSKU     | 25987  | Leukemia, MESH:D015470     | Arsenic Tr   | 25.78 | 20  |
| HMGCS2   | 3158   | Leukemia, MESH:D015470     | Bezafibrat   | 25.77 | 90  |
| ITGB3    | 3690   | Leukemia, MESH:D007948     | 2-(2-amin    | 25.75 | 3   |
| RYR2     | 6262   | Leukemia, MESH:D015473     | Arsenic Ar   | 25.75 | 173 |
| TNFAIP8  | 25816  | Leukemia, MESH:D015473     | Arsenic ar:  | 25.75 | 263 |
| ASPH     | 444    | Leukemia, MESH:D015473     | Arsenic Ar   | 25.74 | 265 |
| MAP2K6   | 5608   | Leukemia, MESH:D015473     | Arsenic Ar   | 25.74 | 266 |
| NFKBIB   | 4793   | Leukemia, MESH:D015470     | Arsenic Tr   | 25.73 | 39  |
| PLCB1    | 23236  | Leukemia, MESH:D015470     | Arsenic Tr   | 25.73 | 24  |
| ANXA5    | 308    | Leukemia, MESH:D01marker/m | Alitretnoi   | 25.71 | 28  |
| C1QC     | 714    | Leukemia, MESH:D015470     | Calcitriol E | 25.7  | 19  |
| CBR1     | 873    | Leukemia, MESH:D015473     | Anthracyc    | 25.7  | 168 |
| CCT4     | 10575  | Leukemia, MESH:D015470     | Air Polluta  | 25.7  | 17  |
| DDX60    | 55601  | Leukemia, MESH:D015470     | Air Polluta  | 25.7  | 19  |
| DNAJC2   | 27000  | Leukemia, MESH:D015470     | Arsenic Tr   | 25.7  | 17  |
| ELK3     | 2004   | Leukemia, MESH:D015470     | Dexameth     | 25.7  | 19  |
| EPHB4    | 2050   | Leukemia, MESH:D015473     | Arsenic Dc   | 25.7  | 155 |
| FZD5     | 7855   | Leukemia, MESH:D015470     | Arsenic Tr   | 25.7  | 29  |
| GPT2     | 84706  | Leukemia, MESH:D015470     | Arsenic Tr   | 25.7  | 24  |
| LZTFL1   | 54585  | Leukemia, MESH:D015473     | Arsenic Ar   | 25.7  | 268 |
| MDK      | 4192   | Leukemia, MESH:D015470     | Alitretnoi   | 25.7  | 84  |
| NRP1     | 8829   | Leukemia, MESH:D015473     | Arsenic ar:  | 25.7  | 162 |
| PGAM2    | 5224   | Leukemia, MESH:D015470     | Alitretnoi   | 25.7  | 30  |
| RERE     | 473    | Leukemia, MESH:D015470     | Arsenic Tr   | 25.7  | 20  |
| RPF2     | 84154  | Leukemia, MESH:D015470     | Arsenic Tr   | 25.7  | 18  |
| RPL21    | 6144   | Leukemia, MESH:D015470     | Arsenic Tr   | 25.7  | 32  |
| SHCBP1   | 79801  | Leukemia, MESH:D015470     | Calcitriol E | 25.7  | 16  |
| SMAD1    | 4086   | Leukemia, MESH:D015470     | Arsenic Tr   | 25.7  | 26  |



|          |        |                        |              |       |     |
|----------|--------|------------------------|--------------|-------|-----|
| SMC1A    | 8243   | Leukemia, MESH:D015470 | Bortezomi    | 25.7  | 26  |
| SOX17    | 64321  | Leukemia, MESH:D015470 | Dasatinib    | 25.7  | 24  |
| CD40LG   | 959    | Leukemia, MESH:D015473 | Arsenic Ar   | 25.68 | 265 |
| NAP1L1   | 4673   | Leukemia, MESH:D015473 | Arsenic Tr   | 25.68 | 267 |
| TNFRSF17 | 608    | Leukemia, MESH:D015473 | Arsenic Ar   | 25.68 | 162 |
| CASP10   | 843    | Leukemia, MESH:D015473 | Arsenic Ar   | 25.67 | 264 |
| GADD45B  | 4616   | Leukemia, MESH:D015473 | Arsenic Ar   | 25.67 | 266 |
| DHCR7    | 1717   | Leukemia, MESH:D015470 | Benzene E    | 25.66 | 31  |
| TCF4     | 6925   | Leukemia, MESH:D015470 | Arsenic Tr   | 25.66 | 27  |
| AQP1     | 358    | Leukemia, MESH:D015473 | Arsenic Ar   | 25.65 | 171 |
| VLDLR    | 7436   | Leukemia, MESH:D015473 | Arsenic Tr   | 25.65 | 262 |
| ARPC5    | 10092  | Leukemia, MESH:D015470 | Dexameth     | 25.63 | 12  |
| CARS2    | 79587  | Leukemia, MESH:D015470 | Dexameth     | 25.63 | 16  |
| DENND4C  | 55667  | Leukemia, MESH:D015470 | Bortezomi    | 25.63 | 11  |
| DPH2     | 1802   | Leukemia, MESH:D015470 | Arsenic Tr   | 25.63 | 15  |
| ERH      | 2079   | Leukemia, MESH:D015470 | Arsenic Tr   | 25.63 | 22  |
| HAVCR2   | 84868  | Leukemia, MESH:D015470 | Air Polluta  | 25.63 | 19  |
| MCHR1    | 2847   | Leukemia, MESH:D015470 | Doxorubic    | 25.63 | 16  |
| MS4A6A   | 64231  | Leukemia, MESH:D015470 | Arsenic Tr   | 25.63 | 19  |
| MTURN    | 222166 | Leukemia, MESH:D015470 | Air Polluta  | 25.63 | 15  |
| MYPN     | 84665  | Leukemia, MESH:D015470 | Dasatinib    | 25.63 | 14  |
| RBM34    | 23029  | Leukemia, MESH:D015470 | Cytarabine   | 25.63 | 88  |
| RNF150   | 57484  | Leukemia, MESH:D015470 | Dexameth     | 25.63 | 12  |
| SYTL1    | 84958  | Leukemia, MESH:D015470 | Arsenic Tr   | 25.63 | 28  |
| TMEM254  | 80195  | Leukemia, MESH:D015470 | Air Polluta  | 25.63 | 11  |
| EIF4A1   | 1973   | Leukemia, MESH:D015473 | Arsenic Tr   | 25.61 | 263 |
| FTMT     | 94033  | Leukemia, MESH:D015470 | Arsenic Tr   | 25.61 | 20  |
| GRB2     | 2885   | Leukemia, MESH:D015470 | Arsenic Tr   | 25.61 | 20  |
| IFIH1    | 64135  | Leukemia, MESH:D015473 | Arsenic Tr   | 25.61 | 263 |
| IL7      | 3574   | Leukemia, MESH:D015470 | Dexameth     | 25.61 | 19  |
| PTPRD    | 5789   | Leukemia, MESH:D015470 | Calcitriol E | 25.61 | 17  |
| PYGM     | 5837   | Leukemia, MESH:D015470 | alvocidib E  | 25.61 | 52  |
| RAB31    | 11031  | Leukemia, MESH:D015470 | Arsenic Tr   | 25.61 | 20  |
| RSRP1    | 57035  | Leukemia, MESH:D015470 | Arsenic Tr   | 25.61 | 90  |
| SHCBP1   | 79801  | Leukemia, MESH:D015473 | arsenite Ci  | 25.61 | 158 |
| SLC9A1   | 6548   | Leukemia, MESH:D015470 | Arsenic Tr   | 25.61 | 24  |
| ALKBH4   | 54784  | Leukemia, MESH:D015470 | Arsenic Tr   | 25.6  | 20  |
| BAG3     | 9531   | Leukemia, MESH:D015473 | Arsenic Ar   | 25.6  | 269 |
| COL18A1  | 80781  | Leukemia, MESH:D015470 | Cytarabine   | 25.6  | 87  |
| KCNH2    | 3757   | Leukemia, MESH:D015473 | alpha-Toc    | 25.6  | 271 |
| PDE4B    | 5142   | Leukemia, MESH:D015473 | Arsenic Ar   | 25.6  | 268 |
| SOX2     | 6657   | Leukemia, MESH:D015473 | Arsenic Ar   | 25.6  | 266 |
| TMEM179  | 374395 | Leukemia, MESH:D015470 | Dexameth     | 25.6  | 14  |
| TPM3     | 7170   | Leukemia, MESH:D015470 | Arsenic Tr   | 25.6  | 30  |
| CLSPN    | 63967  | Leukemia, MESH:D015470 | Arsenic Tr   | 25.59 | 26  |
| DNAJB2   | 3300   | Leukemia, MESH:D015470 | Arsenic Tr   | 25.59 | 37  |
| MTFR2    | 113115 | Leukemia, MESH:D015473 | arsenite Ci  | 25.59 | 158 |
| NME4     | 4833   | Leukemia, MESH:D015470 | Doxorubic    | 25.59 | 18  |
| PRR11    | 55771  | Leukemia, MESH:D015470 | Calcitriol E | 25.59 | 18  |
| TMEM106  | 79022  | Leukemia, MESH:D015473 | Arsenic ar:  | 25.59 | 15  |
| ARL6IP5  | 10550  | Leukemia, MESH:D015470 | Arsenic Tr   | 25.58 | 96  |
| CRTAP    | 10491  | Leukemia, MESH:D015470 | Cytarabine   | 25.58 | 85  |
| CTHRC1   | 115908 | Leukemia, MESH:D015470 | Calcitriol E | 25.58 | 23  |
| DTX4     | 23220  | Leukemia, MESH:D015470 | Calcitriol E | 25.58 | 17  |
| ERAP1    | 51752  | Leukemia, MESH:D015470 | Cyclophos    | 25.58 | 16  |
| GJA4     | 2701   | Leukemia, MESH:D015470 | Arsenic Tr   | 25.58 | 25  |
| HSPA12A  | 259217 | Leukemia, MESH:D015470 | Decitabine   | 25.58 | 22  |
| RTN4RL1  | 146760 | Leukemia, MESH:D015470 | Dexameth     | 25.58 | 19  |

|          |        |                            |              |       |     |
|----------|--------|----------------------------|--------------|-------|-----|
| TUBG1    | 7283   | Leukemia, MESH:D015470     | Arsenic Tr   | 25.58 | 32  |
| TYRO3    | 7301   | Leukemia, MESH:D015470     | Dexameth     | 25.58 | 18  |
| MYH7     | 4625   | Leukemia, MESH:D015473     | Calcitriol C | 25.55 | 23  |
| VCAM1    | 7412   | Leukemia, MESH:D007948     | 2-(2-amin    | 25.55 | 4   |
| ELF3     | 1999   | Leukemia, MESH:D015473     | Antimony     | 25.54 | 264 |
| NASP     | 4678   | Leukemia, MESH:D015473     | Arsenic Tr   | 25.54 | 263 |
| ALDH3A2  | 224    | Leukemia, MESH:D015470     | Arsenic Tr   | 25.53 | 26  |
| CAPN1    | 823    | Leukemia, MESH:D015470     | Alitretinoin | 25.53 | 84  |
| FBP1     | 2203   | Leukemia, MESH:D015470     | Arsenic Tr   | 25.53 | 27  |
| LRP1     | 4035   | Leukemia, MESH:D015470     | Arsenic Tr   | 25.53 | 25  |
| LTA4H    | 4048   | Leukemia, MESH:D015470     | Air Polluta  | 25.53 | 28  |
| MLH1     | 4292   | Leukemia, MESH:D015470     | Air Polluta  | 25.53 | 23  |
| PPP1R3B  | 79660  | Leukemia, MESH:D015470     | Calcitriol C | 25.53 | 14  |
| PSMA5    | 5686   | Leukemia, MESH:D015470     | Air Polluta  | 25.53 | 24  |
| SLC4A4   | 8671   | Leukemia, MESH:D015470     | Dexameth     | 25.53 | 18  |
| EDN1     | 1906   | Leukemia, MESH:D007948     | 2-(2-amin    | 25.52 | 4   |
| FST      | 10468  | Leukemia, MESH:D015473     | Arsenic Tr   | 25.51 | 264 |
| JAK2     | 3717   | Leukemia, MESH:D015473     | Arsenic Ar   | 25.5  | 269 |
| SP4      | 6671   | Leukemia, MESH:D015473     | Arsenic Tr   | 25.49 | 265 |
| AFDN     | 4301   | Leukemia, MESH:D015473     | Arsenic Ar   | 25.48 | 266 |
| CTSB     | 1508   | Leukemia, MESH:D015470     | Arsenic Tr   | 25.48 | 27  |
| TOPBP1   | 11073  | Leukemia, MESH:D015470     | Calcitriol C | 25.48 | 35  |
| ASXL2    | 55252  | Leukemia, MESH:D01marker/m | Air Polluta  | 25.47 | 18  |
| ABCA12   | 26154  | Leukemia, MESH:D015470     | Calcitriol C | 25.47 | 13  |
| ALS2CL   | 259173 | Leukemia, MESH:D015470     | Calcitriol C | 25.47 | 14  |
| AP1S2    | 8905   | Leukemia, MESH:D015470     | Decitabine   | 25.47 | 20  |
| CHD7     | 55636  | Leukemia, MESH:D015470     | Air Polluta  | 25.47 | 23  |
| COL9A1   | 1297   | Leukemia, MESH:D015470     | Cytarabine   | 25.47 | 82  |
| COLGALT2 | 23127  | Leukemia, MESH:D015470     | Dexameth     | 25.47 | 11  |
| DRAP1    | 10589  | Leukemia, MESH:D015470     | Dexameth     | 25.47 | 12  |
| EYA1     | 2138   | Leukemia, MESH:D015470     | Azacitidine  | 25.47 | 17  |
| GPATCH4  | 54865  | Leukemia, MESH:D015470     | Dexameth     | 25.47 | 11  |
| HBP1     | 26959  | Leukemia, MESH:D015473     | Arsenic Tr   | 25.47 | 263 |
| MKRN1    | 23608  | Leukemia, MESH:D015470     | Dexameth     | 25.47 | 16  |
| MUC13    | 56667  | Leukemia, MESH:D015470     | Cyclophos    | 25.47 | 17  |
| NBPF1    | 55672  | Leukemia, MESH:D015473     | Arsenic Ar   | 25.47 | 157 |
| ODF3B    | 440836 | Leukemia, MESH:D015470     | Air Polluta  | 25.47 | 15  |
| PCBP3    | 54039  | Leukemia, MESH:D015470     | Dexameth     | 25.47 | 15  |
| PITRM1   | 10531  | Leukemia, MESH:D015470     | Decitabine   | 25.47 | 23  |
| PKIG     | 11142  | Leukemia, MESH:D015470     | Benzene C    | 25.47 | 39  |
| POLR1E   | 64425  | Leukemia, MESH:D015470     | Dexameth     | 25.47 | 17  |
| REST     | 5978   | Leukemia, MESH:D015470     | Alitretinoin | 25.47 | 22  |
| RET      | 5979   | Leukemia, MESH:D015470     | Azacitidine  | 25.47 | 18  |
| RFNG     | 5986   | Leukemia, MESH:D015470     | Dexameth     | 25.47 | 14  |
| RUVBL1   | 8607   | Leukemia, MESH:D015470     | Arsenic Tr   | 25.47 | 28  |
| SEMA7A   | 8482   | Leukemia, MESH:D015470     | Arsenic Tr   | 25.47 | 24  |
| SUFU     | 51684  | Leukemia, MESH:D015470     | Doxorubic    | 25.47 | 14  |
| TMEM54   | 113452 | Leukemia, MESH:D015470     | Decitabine   | 25.47 | 23  |
| TSPAN4   | 7106   | Leukemia, MESH:D015470     | Arsenic Tr   | 25.47 | 88  |
| CYB5A    | 1528   | Leukemia, MESH:D015473     | Arsenic Ar   | 25.46 | 25  |
| ARRB1    | 408    | Leukemia, MESH:D015470     | Bortezomi    | 25.45 | 25  |
| COL6A2   | 1292   | Leukemia, MESH:D015470     | Cytarabine   | 25.45 | 86  |
| PTGER2   | 5732   | Leukemia, MESH:D015470     | Arsenic Tr   | 25.45 | 31  |
| SLC22A4  | 6583   | Leukemia, MESH:D015470     | Allopurinc   | 25.45 | 24  |
| TNFRSF25 | 8718   | Leukemia, MESH:D015470     | Arsenic Tr   | 25.45 | 32  |
| ACTB     | 60     | Leukemia, MESH:D015470     | Arsenic Tr   | 25.43 | 42  |
| IRAK2    | 3656   | Leukemia, MESH:D015473     | arsenite C   | 25.41 | 162 |
| ITGA3    | 3675   | Leukemia, MESH:D015473     | arsenite C   | 25.41 | 160 |

|          |        |                        |                                         |       |     |
|----------|--------|------------------------|-----------------------------------------|-------|-----|
| RPS6KA3  | 6197   | Leukemia, MESH:D015473 | Arsenic Tr                              | 25.41 | 267 |
| ACHE     | 43     | Leukemia, MESH:D015470 | Arsenic Tr                              | 25.4  | 61  |
| EYA4     | 2070   | Leukemia, MESH:D015473 | Arsenic Ar                              | 25.38 | 265 |
| GPC6     | 10082  | Leukemia, MESH:D015473 | Arsenic Ar                              | 25.38 | 265 |
| PAK3     | 5063   | Leukemia, MESH:D015473 | Arsenic Tr                              | 25.38 | 263 |
| PDCD5    | 9141   | Leukemia, MESH:D015473 | Arsenic Tr                              | 25.38 | 264 |
| WDR76    | 79968  | Leukemia, MESH:D015473 | Arsenic Tr                              | 25.38 | 262 |
| ADIPOR2  | 79602  | Leukemia, MESH:D015470 | Allopurinol                             | 25.37 | 18  |
| CARS1    | 833    | Leukemia, MESH:D015470 | Arsenic Tr                              | 25.37 | 19  |
| COX2     | 4513   | Leukemia, MESH:D015470 | Chloramphenicol                         | 25.37 | 22  |
| DPT      | 1805   | Leukemia, MESH:D015470 | Air Pollutant                           | 25.37 | 16  |
| EFNB2    | 1948   | Leukemia, MESH:D015470 | Calcitriol C                            | 25.37 | 21  |
| GTPBP4   | 23560  | Leukemia, MESH:D015470 | Dronabinol                              | 25.37 | 13  |
| HJURP    | 55355  | Leukemia, MESH:D015470 | Calcitriol C                            | 25.37 | 17  |
| MND1     | 84057  | Leukemia, MESH:D015470 | Arsenic Tr                              | 25.37 | 19  |
| NRXN3    | 9369   | Leukemia, MESH:D015470 | Arsenic Tr                              | 25.37 | 21  |
| PIK3C2B  | 5287   | Leukemia, MESH:D015470 | Dexamethasone                           | 25.37 | 18  |
| PPP1R1A  | 5502   | Leukemia, MESH:D015470 | Dexamethasone                           | 25.37 | 12  |
| PRKCI    | 5584   | Leukemia, MESH:D015470 | Dexamethasone                           | 25.37 | 17  |
| PTPN12   | 5782   | Leukemia, MESH:D015470 | Doxorubicin                             | 25.37 | 19  |
| RHBDF1   | 64285  | Leukemia, MESH:D015470 | Dexamethasone                           | 25.37 | 17  |
| SEMA3C   | 10512  | Leukemia, MESH:D015470 | Calcitriol C                            | 25.37 | 13  |
| SEPTIN4  | 5414   | Leukemia, MESH:D015470 | Arsenic Tr                              | 25.37 | 27  |
| SLC2A6   | 11182  | Leukemia, MESH:D015470 | Benzene C                               | 25.37 | 37  |
| SLC6A8   | 6535   | Leukemia, MESH:D015470 | Arsenic Tr                              | 25.37 | 28  |
| SMC3     | 9126   | Leukemia, MESH:D015470 | Bortezomib                              | 25.37 | 20  |
| SPATA13  | 221178 | Leukemia, MESH:D015470 | Arsenic Tr                              | 25.37 | 22  |
| UBA7     | 7318   | Leukemia, MESH:D015470 | Dexamethasone                           | 25.37 | 17  |
| DPYSL3   | 1809   | Leukemia, MESH:D015470 | Arsenic Tr                              | 25.36 | 24  |
| KIAA0040 | 9674   | Leukemia, MESH:D015470 | Air Pollutant                           | 25.36 | 14  |
| PCNX4    | 64430  | Leukemia, MESH:D015470 | Air Pollutant                           | 25.36 | 14  |
| BCDIN3D  | 144233 | Leukemia, MESH:D015470 | Dexamethasone                           | 25.35 | 14  |
| NBPF10   | 1E+08  | Leukemia, MESH:D015470 | Calcitriol C                            | 25.35 | 14  |
| ATF2     | 1386   | Leukemia, MESH:D007948 | 2-(2-aminophenyl)-2-thiazolecarboxamide | 25.34 | 3   |
| CORO1A   | 11151  | Leukemia, MESH:D015473 | Arsenic Ar                              | 25.34 | 269 |
| PRIM1    | 5557   | Leukemia, MESH:D015473 | Calcitriol C                            | 25.34 | 156 |
| AQP1     | 358    | Leukemia, MESH:D007948 | 2-(2-aminophenyl)-2-thiazolecarboxamide | 25.33 | 4   |
| CD99     | 4267   | Leukemia, MESH:D015470 | Dexamethasone                           | 25.32 | 17  |
| COL9A3   | 1299   | Leukemia, MESH:D015470 | Azacitidine                             | 25.32 | 19  |
| EIF3M    | 10480  | Leukemia, MESH:D015470 | Arsenic Tr                              | 25.32 | 18  |
| FERMT3   | 83706  | Leukemia, MESH:D015470 | Arsenic Tr                              | 25.32 | 16  |
| H2BC9    | 8345   | Leukemia, MESH:D015470 | Arsenic Tr                              | 25.32 | 23  |
| HOMER3   | 9454   | Leukemia, MESH:D015470 | Arsenic Tr                              | 25.32 | 21  |
| HYLS1    | 219844 | Leukemia, MESH:D015470 | Cyclophosphamide                        | 25.32 | 15  |
| KDM2A    | 22992  | Leukemia, MESH:D015470 | Arsenic Tr                              | 25.32 | 35  |
| MARCHF7  | 64844  | Leukemia, MESH:D015470 | Cyclophosphamide                        | 25.32 | 13  |
| RAD52    | 5893   | Leukemia, MESH:D015470 | Arsenic Tr                              | 25.32 | 27  |
| SPATA18  | 132671 | Leukemia, MESH:D015470 | Decitabine                              | 25.32 | 30  |
| SPIN4    | 139886 | Leukemia, MESH:D015470 | Calcitriol C                            | 25.32 | 85  |
| UBR3     | 130507 | Leukemia, MESH:D015470 | Bortezomib                              | 25.32 | 16  |
| ZNF503   | 84858  | Leukemia, MESH:D015470 | Dexamethasone                           | 25.32 | 19  |
| KCNH2    | 3757   | Leukemia, MESH:D015470 | Air Pollutant                           | 25.3  | 81  |
| SNCA     | 6622   | Leukemia, MESH:D015470 | Arsenic Tr                              | 25.3  | 97  |
| GUCY1A1  | 2982   | Leukemia, MESH:D015470 | Calcitriol C                            | 25.28 | 84  |
| ISYNA1   | 51477  | Leukemia, MESH:D015470 | Decitabine                              | 25.28 | 25  |
| LIMA1    | 51474  | Leukemia, MESH:D015470 | Bortezomib                              | 25.28 | 22  |
| LY6D     | 8581   | Leukemia, MESH:D015473 | Arsenic De                              | 25.28 | 158 |
| PRPF8    | 10594  | Leukemia, MESH:D015473 | Arsenic Ar                              | 25.28 | 264 |

|          |        |                            |              |       |     |
|----------|--------|----------------------------|--------------|-------|-----|
| PTPRR    | 5801   | Leukemia, MESH:D015473     | arsenite[D   | 25.28 | 158 |
| TPD52L1  | 7164   | Leukemia, MESH:D015473     | Arsenic Tr   | 25.28 | 263 |
| UBE2T    | 29089  | Leukemia, MESH:D015470     | Calcitriol[C | 25.28 | 18  |
| AQP3     | 360    | Leukemia, MESH:D015473     | Arsenic[Ar   | 25.27 | 266 |
| FBN1     | 2200   | Leukemia, MESH:D015470     | Dexameth     | 25.27 | 20  |
| GCH1     | 2643   | Leukemia, MESH:D015473     | Arsenic[ar:  | 25.27 | 162 |
| MCM3     | 4172   | Leukemia, MESH:D015470     | Air Polluta  | 25.27 | 16  |
| MYLK     | 4638   | Leukemia, MESH:D015473     | Arsenic Tr   | 25.27 | 262 |
| PPP1R3C  | 5507   | Leukemia, MESH:D015470     | Dasatinib[I  | 25.27 | 23  |
| BIN1     | 274    | Leukemia, MESH:D015470     | Bortezomi    | 25.26 | 25  |
| CAPNS1   | 826    | Leukemia, MESH:D015470     | Arsenic Tr   | 25.26 | 23  |
| FUCA1    | 2517   | Leukemia, MESH:D015470     | Air Polluta  | 25.26 | 29  |
| GASK1B   | 51313  | Leukemia, MESH:D015470     | Air Polluta  | 25.26 | 16  |
| GNG2     | 54331  | Leukemia, MESH:D015470     | Dexameth     | 25.26 | 20  |
| PEA15    | 8682   | Leukemia, MESH:D015470     | Dexameth     | 25.26 | 20  |
| PPM1A    | 5494   | Leukemia, MESH:D015470     | Arsenic Tr   | 25.26 | 25  |
| RBMS1    | 5937   | Leukemia, MESH:D015470     | Benzene[C    | 25.26 | 33  |
| ROR1     | 4919   | Leukemia, MESH:D015470     | Calcitriol[C | 25.26 | 16  |
| VASN     | 114990 | Leukemia, MESH:D015470     | Cytarabine   | 25.26 | 82  |
| DNMT1    | 1786   | Leukemia, MESH:D015473     | Arsenic[ar:  | 25.25 | 266 |
| CXCL9    | 4283   | Leukemia, MESH:D015473     | Arsenic[Ar   | 25.23 | 269 |
| THRB     | 7068   | Leukemia, MESH:D015470     | Arsenic Tr   | 25.22 | 28  |
| LAMB3    | 3914   | Leukemia, MESH:D015473     | Arsenic Tr   | 25.21 | 157 |
| XRCC5    | 7520   | Leukemia, MESH:D015473     | Arsenic[Ar   | 25.21 | 264 |
| GPD2     | 2820   | Leukemia, MESH:D015470     | Arsenic Tr   | 25.2  | 29  |
| MCM8     | 84515  | Leukemia, MESH:D015473     | Arsenic[Ca   | 25.18 | 158 |
| NUP155   | 9631   | Leukemia, MESH:D015473     | arsenite[Ci  | 25.18 | 158 |
| SLC39A11 | 201266 | Leukemia, MESH:D015473     | Arsenic[ar:  | 25.18 | 158 |
| ZBTB7A   | 51341  | Leukemia, MESH:D01marker/m | Dexameth     | 25.17 | 17  |
| CASD1    | 64921  | Leukemia, MESH:D015470     | Dexameth     | 25.17 | 17  |
| CYBB     | 1536   | Leukemia, MESH:D015470     | Arsenic Tr   | 25.17 | 52  |
| D2HGDH   | 728294 | Leukemia, MESH:D015470     | Dexameth     | 25.17 | 14  |
| FANCL    | 55120  | Leukemia, MESH:D015470     | Dexameth     | 25.17 | 16  |
| ING5     | 84289  | Leukemia, MESH:D015470     | Arsenic Tr   | 25.17 | 29  |
| METTL21A | 151194 | Leukemia, MESH:D015470     | Bortezomi    | 25.17 | 11  |
| NUDCD1   | 84955  | Leukemia, MESH:D015470     | Air Polluta  | 25.17 | 14  |
| RIC8A    | 60626  | Leukemia, MESH:D015470     | Benzene[C    | 25.17 | 23  |
| STX8     | 9482   | Leukemia, MESH:D015470     | Dexameth     | 25.17 | 11  |
| VTGN1    | 79679  | Leukemia, MESH:D015470     | Calcitriol[C | 25.17 | 12  |
| ZKSCAN1  | 7586   | Leukemia, MESH:D015470     | Air Polluta  | 25.17 | 13  |
| ZXDC     | 79364  | Leukemia, MESH:D015470     | Dexameth     | 25.17 | 11  |
| MECOM    | 2122   | Leukemia, MESH:D01marker/m | Arsenic Tr   | 25.15 | 22  |
| AHNAK2   | 113146 | Leukemia, MESH:D015470     | Decitabine   | 25.15 | 21  |
| DSG2     | 1829   | Leukemia, MESH:D015470     | Arsenic Tr   | 25.15 | 19  |
| FJX1     | 24147  | Leukemia, MESH:D015470     | Dexameth     | 25.15 | 12  |
| FOXO4    | 4303   | Leukemia, MESH:D015470     | Arsenic Tr   | 25.15 | 29  |
| GHR      | 2690   | Leukemia, MESH:D015470     | Bortezomi    | 25.15 | 86  |
| GPR183   | 1880   | Leukemia, MESH:D015470     | Arsenic Tr   | 25.15 | 25  |
| GPRC5B   | 51704  | Leukemia, MESH:D015470     | Calcitriol[C | 25.15 | 22  |
| LATS2    | 26524  | Leukemia, MESH:D015470     | Arsenic Tr   | 25.15 | 29  |
| PKMYT1   | 9088   | Leukemia, MESH:D015470     | Arsenic Tr   | 25.15 | 17  |
| UBE3A    | 7337   | Leukemia, MESH:D015470     | Arsenic Tr   | 25.15 | 23  |
| WIF1     | 11197  | Leukemia, MESH:D015470     | Arsenic Tr   | 25.15 | 36  |
| XRCC3    | 7517   | Leukemia, MESH:D015470     | Arsenic Tr   | 25.15 | 30  |
| DCLK1    | 9201   | Leukemia, MESH:D015470     | Arsenic Tr   | 25.12 | 31  |
| GFRA1    | 2674   | Leukemia, MESH:D015470     | Cyclophos    | 25.12 | 19  |
| H19      | 283120 | Leukemia, MESH:D015470     | Decitabine   | 25.12 | 25  |
| IFI44    | 10561  | Leukemia, MESH:D015470     | Bortezomi    | 25.12 | 23  |

|         |        |                            |              |       |     |
|---------|--------|----------------------------|--------------|-------|-----|
| PWWP2A  | 114825 | Leukemia, MESH:D015470     | Dexameth     | 25.12 | 15  |
| TTI1    | 9675   | Leukemia, MESH:D015470     | Dexameth     | 25.12 | 14  |
| RXRG    | 6258   | Leukemia, MESH:D015473     | Dexameth     | 25.09 | 159 |
| CAMP    | 820    | Leukemia, MESH:D015473     | Arsenic Ar   | 25.08 | 263 |
| FABP3   | 2170   | Leukemia, MESH:D015470     | Bezafibrat   | 25.08 | 36  |
| IER2    | 9592   | Leukemia, MESH:D015473     | Antimony     | 25.08 | 266 |
| KMT2A   | 4297   | Leukemia, MESH:D015473     | Arsenic Tr   | 25.08 | 265 |
| MAPK7   | 5598   | Leukemia, MESH:D015473     | Arsenic Ar   | 25.08 | 162 |
| CTSZ    | 1522   | Leukemia, MESH:D01marker/m | Benzoates    | 25.05 | 23  |
| ACAD11  | 84129  | Leukemia, MESH:D015470     | Decitabine   | 25.05 | 17  |
| ATP1B2  | 482    | Leukemia, MESH:D015470     | Decitabine   | 25.05 | 19  |
| FLNB    | 2317   | Leukemia, MESH:D015470     | Arsenic Tr   | 25.05 | 28  |
| FXN     | 2395   | Leukemia, MESH:D015470     | Dexameth     | 25.05 | 17  |
| GPR137B | 7107   | Leukemia, MESH:D015470     | Benzene C    | 25.05 | 33  |
| HADHB   | 3032   | Leukemia, MESH:D015470     | Bezafibrat   | 25.05 | 30  |
| NEIL3   | 55247  | Leukemia, MESH:D015470     | Calcitriol C | 25.05 | 23  |
| NUDT4   | 11163  | Leukemia, MESH:D015470     | Arsenic Tr   | 25.05 | 21  |
| PDZD2   | 23037  | Leukemia, MESH:D015470     | Arsenic Tr   | 25.05 | 22  |
| RAB20   | 55647  | Leukemia, MESH:D015470     | Dexameth     | 25.05 | 25  |
| RPA3    | 6119   | Leukemia, MESH:D015470     | Arsenic Tr   | 25.05 | 23  |
| SATB2   | 23314  | Leukemia, MESH:D015470     | Arsenic Tr   | 25.05 | 31  |
| STRA6   | 64220  | Leukemia, MESH:D015470     | Arsenic Tr   | 25.05 | 16  |
| TCF19   | 6941   | Leukemia, MESH:D015470     | Arsenic Tr   | 25.05 | 23  |
| AMOTL1  | 154810 | Leukemia, MESH:D015470     | Dexameth     | 25.02 | 26  |
| CCDC117 | 150275 | Leukemia, MESH:D015470     | Dexameth     | 25.02 | 15  |
| CHFR    | 55743  | Leukemia, MESH:D015470     | Bortezomi    | 25.02 | 18  |
| DDX11   | 1663   | Leukemia, MESH:D015470     | Bortezomi    | 25.02 | 17  |
| EXOC7   | 23265  | Leukemia, MESH:D015470     | Dexameth     | 25.02 | 16  |
| GIMAP4  | 55303  | Leukemia, MESH:D015470     | Air Polluta  | 25.02 | 15  |
| GPR18   | 2841   | Leukemia, MESH:D015470     | Arsenic Tr   | 25.02 | 16  |
| HIF1AN  | 55662  | Leukemia, MESH:D015470     | Bortezomi    | 25.02 | 12  |
| KIFAP3  | 22920  | Leukemia, MESH:D015470     | Calcitriol C | 25.02 | 23  |
| MET     | 4233   | Leukemia, MESH:D015473     | Arsenic Tr   | 25.02 | 263 |
| METTL3  | 56339  | Leukemia, MESH:D015470     | Air Polluta  | 25.02 | 23  |
| MNT     | 4335   | Leukemia, MESH:D015470     | Arsenic Tr   | 25.02 | 23  |
| NCSTN   | 23385  | Leukemia, MESH:D015470     | Dexameth     | 25.02 | 10  |
| RAB7A   | 7879   | Leukemia, MESH:D015470     | Air Polluta  | 25.02 | 29  |
| ROPN1L  | 83853  | Leukemia, MESH:D015470     | Indometha    | 25.02 | 11  |
| SYP     | 6855   | Leukemia, MESH:D015470     | 2-(2-chlor   | 25.02 | 15  |
| TMEM109 | 79073  | Leukemia, MESH:D015470     | Dexameth     | 25.02 | 15  |
| TMEM38A | 79041  | Leukemia, MESH:D015470     | Dexameth     | 25.02 | 13  |
| ZCCHC14 | 23174  | Leukemia, MESH:D015470     | Benzene C    | 25.02 | 30  |
| EPHX1   | 2052   | Leukemia, MESH:D015473     | Antimony     | 25.01 | 264 |
| MAOA    | 4128   | Leukemia, MESH:D015473     | Antimony     | 25.01 | 265 |
| GATA1   | 2623   | Leukemia, MESH:D015473     | Aclarubici   | 24.99 | 264 |
| PLPP2   | 8612   | Leukemia, MESH:D015473     | Arsenic Tr   | 24.98 | 262 |
| PMAIP1  | 5366   | Leukemia, MESH:D015473     | Arsenic Tr   | 24.98 | 264 |
| CA9     | 768    | Leukemia, MESH:D015470     | Arsenic Tr   | 24.97 | 23  |
| CLDN3   | 1365   | Leukemia, MESH:D015470     | Air Polluta  | 24.97 | 18  |
| CYP3A7  | 1551   | Leukemia, MESH:D015470     | 2-(2-chlor   | 24.97 | 13  |
| EIF2A   | 83939  | Leukemia, MESH:D015470     | 2-(2-chlor   | 24.97 | 23  |
| NTRK3   | 4916   | Leukemia, MESH:D01marker/m | Arsenic Tr   | 24.94 | 23  |
| BCAT2   | 587    | Leukemia, MESH:D015470     | Arsenic Tr   | 24.94 | 23  |
| CDV3    | 55573  | Leukemia, MESH:D015470     | Arsenic Tr   | 24.94 | 22  |
| DYRK2   | 8445   | Leukemia, MESH:D015470     | Arsenic Tr   | 24.94 | 26  |
| G2E3    | 55632  | Leukemia, MESH:D015470     | Calcitriol C | 24.94 | 17  |
| IFI44L  | 10964  | Leukemia, MESH:D015470     | Benzene C    | 24.94 | 35  |
| KCNB1   | 3745   | Leukemia, MESH:D015470     | Dexameth     | 24.94 | 18  |

|          |        |                        |              |       |     |
|----------|--------|------------------------|--------------|-------|-----|
| NUAK1    | 9891   | Leukemia, MESH:D015470 | Arsenic Tr   | 24.94 | 17  |
| PPAT     | 5471   | Leukemia, MESH:D015470 | Arsenic Tr   | 24.94 | 20  |
| APOE     | 348    | Leukemia, MESH:D015470 | Arsenic Tr   | 24.93 | 36  |
| HSPH1    | 10808  | Leukemia, MESH:D015470 | Alitretinoi  | 24.93 | 24  |
| NUPR1    | 26471  | Leukemia, MESH:D015470 | Arsenic Tr   | 24.93 | 33  |
| CSF1     | 1435   | Leukemia, MESH:D015473 | Arsenic Ca   | 24.92 | 159 |
| S100A4   | 6275   | Leukemia, MESH:D007948 | 2-(2-amin    | 24.92 | 4   |
| DGAT2    | 84649  | Leukemia, MESH:D015470 | Benzene C    | 24.9  | 29  |
| PIR      | 8544   | Leukemia, MESH:D015470 | Alitretinoi  | 24.9  | 23  |
| CAMK2D   | 817    | Leukemia, MESH:D015473 | Arsenic Ar   | 24.89 | 262 |
| DDX58    | 23586  | Leukemia, MESH:D015470 | 15-deoxy-    | 24.89 | 20  |
| LAMP1    | 3916   | Leukemia, MESH:D015473 | Arsenic Tr   | 24.89 | 263 |
| MT1E     | 4493   | Leukemia, MESH:D015470 | Arsenic Tr   | 24.89 | 89  |
| PCDHB14  | 56122  | Leukemia, MESH:D015470 | Azacitidine  | 24.89 | 15  |
| SHFL     | 55337  | Leukemia, MESH:D015470 | Decitabine   | 24.89 | 20  |
| SLC25A4  | 291    | Leukemia, MESH:D015473 | Arsenic Ar   | 24.89 | 269 |
| SLC2A4RC | 56731  | Leukemia, MESH:D015470 | Dexameth     | 24.89 | 15  |
| TWIST1   | 7291   | Leukemia, MESH:D015473 | Arsenic ar:  | 24.89 | 161 |
| YWHAE    | 7531   | Leukemia, MESH:D015470 | Air Polluta  | 24.89 | 27  |
| EDN2     | 1907   | Leukemia, MESH:D015473 | Arsenic De   | 24.88 | 162 |
| KDR      | 3791   | Leukemia, MESH:D015473 | Arsenic Tr   | 24.88 | 264 |
| TNFSF13B | 10673  | Leukemia, MESH:D015473 | Arsenic Ar   | 24.88 | 265 |
| TRIM6    | 117854 | Leukemia, MESH:D015473 | Arsenic Ca   | 24.88 | 160 |
| ALG14    | 199857 | Leukemia, MESH:D015470 | Dexameth     | 24.87 | 14  |
| CD58     | 965    | Leukemia, MESH:D015470 | Doxorubic    | 24.87 | 28  |
| CORO1B   | 57175  | Leukemia, MESH:D015470 | Alitretinoi  | 24.87 | 12  |
| FOSL1    | 8061   | Leukemia, MESH:D015470 | Arsenic Tr   | 24.87 | 41  |
| HERC1    | 8925   | Leukemia, MESH:D015470 | Arsenic Tr   | 24.87 | 24  |
| JAZF1    | 221895 | Leukemia, MESH:D015470 | Dexameth     | 24.87 | 15  |
| KLHL7    | 55975  | Leukemia, MESH:D015470 | Decitabine   | 24.87 | 22  |
| MICAL3   | 57553  | Leukemia, MESH:D015470 | Calcitriol E | 24.87 | 19  |
| PPIL3    | 53938  | Leukemia, MESH:D015470 | Arsenic Tr   | 24.87 | 20  |
| RAG1     | 5896   | Leukemia, MESH:D015470 | Benzene C    | 24.87 | 29  |
| RNFT2    | 84900  | Leukemia, MESH:D015470 | Dronabinc    | 24.87 | 11  |
| SGCD     | 6444   | Leukemia, MESH:D015470 | Arsenic Tr   | 24.87 | 20  |
| SOX3     | 6658   | Leukemia, MESH:D015470 | Cytarabine   | 24.87 | 80  |
| TDRD3    | 81550  | Leukemia, MESH:D015470 | Decitabine   | 24.87 | 32  |
| VEZF1    | 7716   | Leukemia, MESH:D015470 | Cytarabine   | 24.87 | 85  |
| IL10     | 3586   | Leukemia, MESH:D015473 | alpha-Toc    | 24.86 | 271 |
| CYP11A1  | 1583   | Leukemia, MESH:D015470 | Alitretinoi  | 24.85 | 29  |
| AOC3     | 8639   | Leukemia, MESH:D015470 | Arsenic Tr   | 24.84 | 24  |
| ASAP1    | 50807  | Leukemia, MESH:D015470 | Bortezomi    | 24.84 | 19  |
| ATIC     | 471    | Leukemia, MESH:D015470 | Arsenic Tr   | 24.84 | 23  |
| CSNK2A2  | 1459   | Leukemia, MESH:D015470 | Decitabine   | 24.84 | 24  |
| EHBP1    | 23301  | Leukemia, MESH:D015470 | Calcitriol E | 24.84 | 17  |
| FAS      | 355    | Leukemia, MESH:D007948 | 2-(2-amin    | 24.84 | 4   |
| FKBP1B   | 2281   | Leukemia, MESH:D015470 | Calcitriol C | 24.84 | 17  |
| GCK      | 2645   | Leukemia, MESH:D015470 | Alitretinoi  | 24.84 | 34  |
| JAG1     | 182    | Leukemia, MESH:D015470 | Dasatinib I  | 24.84 | 20  |
| KALRN    | 8997   | Leukemia, MESH:D015470 | Arsenic Tr   | 24.84 | 24  |
| KCNN2    | 3781   | Leukemia, MESH:D015470 | Arsenic Tr   | 24.84 | 91  |
| MATR3    | 9782   | Leukemia, MESH:D015470 | Doxorubic    | 24.84 | 20  |
| MBNL1    | 4154   | Leukemia, MESH:D015470 | Bortezomi    | 24.84 | 12  |
| MCTP1    | 79772  | Leukemia, MESH:D015470 | Arsenic Tr   | 24.84 | 16  |
| PDLIM3   | 27295  | Leukemia, MESH:D015470 | Cytarabine   | 24.84 | 90  |
| SEL1L    | 6400   | Leukemia, MESH:D015470 | Benzene E    | 24.84 | 39  |
| SHISA2   | 387914 | Leukemia, MESH:D015470 | Arsenic Tr   | 24.84 | 27  |
| SPARCL1  | 8404   | Leukemia, MESH:D015470 | Calcitriol E | 24.84 | 17  |

|         |        |                        |              |       |     |
|---------|--------|------------------------|--------------|-------|-----|
| HIPK2   | 28996  | Leukemia, MESH:D015473 | Arsenic ars  | 24.83 | 161 |
| MAPKAPK | 9261   | Leukemia, MESH:D015473 | Arsenic Tr   | 24.83 | 266 |
| PCLAF   | 9768   | Leukemia, MESH:D015473 | arsenite Ci  | 24.83 | 11  |
| SFRP2   | 6423   | Leukemia, MESH:D015473 | Arsenic Ar   | 24.83 | 268 |
| CXCL10  | 3627   | Leukemia, MESH:D015473 | Arsenic Tr   | 24.82 | 266 |
| ELOVL5  | 60481  | Leukemia, MESH:D015470 | Arsenic Tr   | 24.81 | 43  |
| MYH9    | 4627   | Leukemia, MESH:D015470 | Arsenic Tr   | 24.81 | 24  |
| NPR3    | 4883   | Leukemia, MESH:D015470 | Dexameth     | 24.81 | 18  |
| A2M     | 2      | Leukemia, MESH:D015473 | Antimony     | 24.79 | 260 |
| ANAPC1  | 64682  | Leukemia, MESH:D015473 | arsenite D   | 24.79 | 157 |
| FANCC   | 2176   | Leukemia, MESH:D015473 | Arsenic Ar   | 24.79 | 265 |
| MAP2K2  | 5605   | Leukemia, MESH:D015473 | 2-(2-chlor   | 24.79 | 264 |
| RNF4    | 6047   | Leukemia, MESH:D015473 | Arsenic Ar   | 24.79 | 264 |
| VAV1    | 7409   | Leukemia, MESH:D015473 | Arsenic Ar   | 24.79 | 266 |
| MCM2    | 4171   | Leukemia, MESH:D015473 | Antimony     | 24.78 | 262 |
| PODN    | 127435 | Leukemia, MESH:D015473 | Arsenic Ca   | 24.77 | 10  |
| FOS     | 2353   | Leukemia, MESH:D015473 | alpha-Toc    | 24.76 | 269 |
| BDH1    | 622    | Leukemia, MESH:D015470 | Arsenic Tr   | 24.74 | 24  |
| CAVIN3  | 112464 | Leukemia, MESH:D015470 | Arsenic Tr   | 24.74 | 87  |
| CPS1    | 1373   | Leukemia, MESH:D015470 | Dexameth     | 24.74 | 28  |
| CYB5R3  | 1727   | Leukemia, MESH:D015470 | Arsenic Tr   | 24.74 | 21  |
| FH      | 2271   | Leukemia, MESH:D015470 | Arsenic Tr   | 24.74 | 21  |
| PSMB9   | 5698   | Leukemia, MESH:D015470 | Calcitriol C | 24.74 | 19  |
| RAMP2   | 10266  | Leukemia, MESH:D015470 | Arsenic Tr   | 24.74 | 30  |
| SP3     | 6670   | Leukemia, MESH:D015470 | Arsenic Tr   | 24.74 | 71  |
| TP63    | 8626   | Leukemia, MESH:D015470 | Arsenic Tr   | 24.74 | 20  |
| CDK10   | 8558   | Leukemia, MESH:D015470 | Doxorubic    | 24.73 | 18  |
| FRYL    | 285527 | Leukemia, MESH:D015470 | Doxorubic    | 24.73 | 16  |
| KAT2A   | 2648   | Leukemia, MESH:D015470 | Arsenic Tr   | 24.73 | 21  |
| MTMR6   | 9107   | Leukemia, MESH:D015470 | Bortezomi    | 24.73 | 18  |
| RHOF    | 54509  | Leukemia, MESH:D015470 | Arsenic Tr   | 24.73 | 35  |
| SNAI1   | 6615   | Leukemia, MESH:D015470 | Arsenic Tr   | 24.73 | 33  |
| UQCR10  | 29796  | Leukemia, MESH:D015470 | Dexameth     | 24.73 | 16  |
| ZNF367  | 195828 | Leukemia, MESH:D015470 | Calcitriol ( | 24.73 | 13  |
| IDH1    | 3417   | Leukemia, MESH:D015470 | marker/m     | 24.72 | 40  |
| HIF1A   | 3091   | Leukemia, MESH:D007948 | 2-(2-amin    | 24.72 | 4   |
| TIPARP  | 25976  | Leukemia, MESH:D015470 | Air Polluta  | 24.72 | 20  |
| ALDH1B1 | 219    | Leukemia, MESH:D015473 | Arsenic Tr   | 24.71 | 264 |
| BIK     | 638    | Leukemia, MESH:D015473 | Arsenic Ar   | 24.71 | 262 |
| FGF1    | 2246   | Leukemia, MESH:D007948 | 2-(2-amin    | 24.71 | 3   |
| LCK     | 3932   | Leukemia, MESH:D015473 | alpha-Toc    | 24.71 | 157 |
| NR2F2   | 7026   | Leukemia, MESH:D015473 | Arsenic Tr   | 24.71 | 264 |
| SLC39A8 | 64116  | Leukemia, MESH:D015473 | Arsenic Ca   | 24.71 | 159 |
| SMPD3   | 55512  | Leukemia, MESH:D015473 | Arsenic Ar   | 24.71 | 267 |
| CYP2A4  | 13086  | Leukemia, MESH:D015473 | Arsenic ars  | 24.7  | 159 |
| FOSB    | 2354   | Leukemia, MESH:D015473 | alpha-Toc    | 24.7  | 270 |
| CTSD    | 1509   | Leukemia, MESH:D015473 | alpha-Toc    | 24.69 | 271 |
| AKR1B10 | 57016  | Leukemia, MESH:D015470 | Arsenic Tr   | 24.68 | 68  |
| BOD1L1  | 259282 | Leukemia, MESH:D015470 | Arsenic Tr   | 24.68 | 16  |
| FAM118B | 79607  | Leukemia, MESH:D015470 | Air Polluta  | 24.68 | 15  |
| SIRPB1  | 10326  | Leukemia, MESH:D015470 | Azacitidin   | 24.68 | 21  |
| SNAI2   | 6591   | Leukemia, MESH:D007948 | Arsenic Tr   | 24.68 | 4   |
| TMEM50A | 23585  | Leukemia, MESH:D015470 | Dexameth     | 24.67 | 14  |
| TSTD2   | 158427 | Leukemia, MESH:D015470 | Dexameth     | 24.67 | 14  |
| ACADVL  | 37     | Leukemia, MESH:D015470 | Bezafibrat   | 24.66 | 37  |
| CYP26A1 | 1592   | Leukemia, MESH:D015473 | Arsenic Ar   | 24.66 | 265 |
| GRB10   | 2887   | Leukemia, MESH:D015470 | Arsenic Tr   | 24.66 | 26  |
| LAMB1   | 3912   | Leukemia, MESH:D015470 | Chloroqui    | 24.66 | 26  |

|          |        |                            |              |       |     |
|----------|--------|----------------------------|--------------|-------|-----|
| PPP2CA   | 5515   | Leukemia, MESH:D015470     | Arsenic Tr   | 24.66 | 25  |
| PSMB8    | 5696   | Leukemia, MESH:D015470     | Arsenic Tr   | 24.66 | 25  |
| RETN     | 56729  | Leukemia, MESH:D01marker/m | Arsenic Tr   | 24.65 | 261 |
| ATP2B1   | 490    | Leukemia, MESH:D015473     | Antimony     | 24.65 | 270 |
| CACNA1C  | 775    | Leukemia, MESH:D015473     | Arsenic Ar   | 24.65 | 264 |
| CENPA    | 1058   | Leukemia, MESH:D015473     | arsenite C   | 24.65 | 158 |
| FANCD2   | 2177   | Leukemia, MESH:D015473     | Arsenic Tr   | 24.65 | 264 |
| IGFBP7   | 3490   | Leukemia, MESH:D015473     | Arsenic Ar   | 24.65 | 265 |
| MT2A     | 4502   | Leukemia, MESH:D015473     | Antimony     | 24.65 | 171 |
| ADARB1   | 104    | Leukemia, MESH:D015470     | Dexameth     | 24.64 | 22  |
| AK2      | 204    | Leukemia, MESH:D015470     | Decitabine   | 24.64 | 23  |
| ARHGAP2  | 23092  | Leukemia, MESH:D015470     | Arsenic Tr   | 24.64 | 22  |
| ATP2A3   | 489    | Leukemia, MESH:D015470     | Arsenic Tr   | 24.64 | 21  |
| CAMK1D   | 57118  | Leukemia, MESH:D015470     | Calcitriol C | 24.64 | 17  |
| CCR6     | 1235   | Leukemia, MESH:D015470     | Dexameth     | 24.64 | 16  |
| EPHA1    | 2041   | Leukemia, MESH:D015470     | Bortezomi    | 24.64 | 20  |
| FLRT3    | 23767  | Leukemia, MESH:D015470     | Arsenic Tr   | 24.64 | 25  |
| FOXN3    | 1112   | Leukemia, MESH:D015470     | Benzene C    | 24.64 | 34  |
| INA      | 9118   | Leukemia, MESH:D015470     | Cytarabine   | 24.64 | 81  |
| MEIS2    | 4212   | Leukemia, MESH:D015470     | Alitretinoi  | 24.64 | 16  |
| RASA1    | 5921   | Leukemia, MESH:D015470     | Dexameth     | 24.64 | 25  |
| SERPINB8 | 5271   | Leukemia, MESH:D015470     | Alitretinoi  | 24.64 | 20  |
| TSC1     | 7248   | Leukemia, MESH:D015470     | Azacitidine  | 24.64 | 25  |
| STAR     | 6770   | Leukemia, MESH:D015473     | alpha-Toc    | 24.62 | 263 |
| AHCYL1   | 10768  | Leukemia, MESH:D015473     | Arsenic Ar   | 24.61 | 263 |
| GCA      | 25801  | Leukemia, MESH:D015473     | arsenite C   | 24.61 | 161 |
| PKIA     | 5569   | Leukemia, MESH:D015473     | Arsenic ar   | 24.61 | 161 |
| SLA      | 6503   | Leukemia, MESH:D015473     | Arsenic Tr   | 24.61 | 267 |
| SLC43A3  | 29015  | Leukemia, MESH:D015473     | Arsenic ar   | 24.61 | 160 |
| NRN1     | 51299  | Leukemia, MESH:D015473     | Arsenic ar   | 24.6  | 159 |
| PTPRN2   | 5799   | Leukemia, MESH:D015473     | Arsenic Ar   | 24.6  | 265 |
| SGO2     | 151246 | Leukemia, MESH:D015473     | Arsenic Ca   | 24.6  | 158 |
| TMTC1    | 83857  | Leukemia, MESH:D015473     | Arsenic Ar   | 24.6  | 265 |
| WT1      | 7490   | Leukemia, MESH:D01marker/m | Arsenic Tr   | 24.59 | 22  |
| ACADL    | 33     | Leukemia, MESH:D015470     | Bezafibrat   | 24.59 | 19  |
| ALDH1B1  | 219    | Leukemia, MESH:D015470     | Arsenic Tr   | 24.59 | 22  |
| ANGPT1   | 284    | Leukemia, MESH:D015473     | Arsenic Ar   | 24.59 | 267 |
| AP3M2    | 10947  | Leukemia, MESH:D015470     | Air Polluta  | 24.59 | 29  |
| AQP4     | 361    | Leukemia, MESH:D015470     | Arsenic Tr   | 24.59 | 22  |
| ATE1     | 11101  | Leukemia, MESH:D015470     | Bortezomi    | 24.59 | 17  |
| C15ORF48 | 84419  | Leukemia, MESH:D015470     | Air Polluta  | 24.59 | 18  |
| CDCA8    | 55143  | Leukemia, MESH:D015473     | arsenite C   | 24.59 | 160 |
| COX6B2   | 125965 | Leukemia, MESH:D015470     | Arsenic Tr   | 24.59 | 24  |
| E2F2     | 1870   | Leukemia, MESH:D015473     | Arsenic Ar   | 24.59 | 265 |
| FAM241A  | 132720 | Leukemia, MESH:D015470     | Dexameth     | 24.59 | 15  |
| KAZALD1  | 81621  | Leukemia, MESH:D015470     | Dexameth     | 24.59 | 16  |
| MAP2K4   | 6416   | Leukemia, MESH:D015470     | alvocidib    | 24.59 | 26  |
| PAPSS2   | 9060   | Leukemia, MESH:D015470     | Arsenic Tr   | 24.59 | 45  |
| PBRM1    | 55193  | Leukemia, MESH:D015470     | Doxorubic    | 24.59 | 18  |
| PPIH     | 10465  | Leukemia, MESH:D015470     | Arsenic Tr   | 24.59 | 24  |
| RBM4     | 5936   | Leukemia, MESH:D015470     | Decitabine   | 24.59 | 21  |
| RRP15    | 51018  | Leukemia, MESH:D015470     | Doxorubic    | 24.59 | 15  |
| SEC16A   | 9919   | Leukemia, MESH:D015470     | Benzene C    | 24.59 | 29  |
| SHOX2    | 6474   | Leukemia, MESH:D015470     | Calcitriol C | 24.59 | 19  |
| SMAD4    | 4089   | Leukemia, MESH:D015473     | alpha-Toc    | 24.59 | 164 |
| STRIP2   | 57464  | Leukemia, MESH:D015470     | Dexameth     | 24.59 | 18  |
| SUGP2    | 10147  | Leukemia, MESH:D015470     | Decitabine   | 24.59 | 23  |
| TFPI2    | 7980   | Leukemia, MESH:D015473     | arsenite D   | 24.59 | 157 |



|          |        |                        |              |       |     |
|----------|--------|------------------------|--------------|-------|-----|
| TPD52L2  | 7165   | Leukemia, MESH:D015470 | Arsenic Tr   | 24.59 | 29  |
| ZMYND11  | 10771  | Leukemia, MESH:D015470 | Bortezomi    | 24.59 | 13  |
| CENPW    | 387103 | Leukemia, MESH:D015470 | Calcitriol[C | 24.54 | 16  |
| CITED4   | 163732 | Leukemia, MESH:D015470 | Calcitriol[C | 24.54 | 16  |
| CXXC5    | 51523  | Leukemia, MESH:D015470 | Arsenic Tr   | 24.54 | 16  |
| DAXX     | 1616   | Leukemia, MESH:D015470 | Arsenic Tr   | 24.54 | 23  |
| ENTPD1   | 953    | Leukemia, MESH:D015470 | Air Polluta  | 24.54 | 82  |
| FUT8     | 2530   | Leukemia, MESH:D015470 | Calcitriol[C | 24.54 | 24  |
| LRIG1    | 26018  | Leukemia, MESH:D015470 | Calcitriol[C | 24.54 | 81  |
| MYL1     | 4632   | Leukemia, MESH:D015470 | Dexameth     | 24.54 | 19  |
| PLA1A    | 51365  | Leukemia, MESH:D015470 | Dexameth     | 24.54 | 16  |
| SYTL2    | 54843  | Leukemia, MESH:D015470 | Cytarabine   | 24.54 | 81  |
| ZFR      | 51663  | Leukemia, MESH:D015470 | Cyclophos    | 24.54 | 14  |
| ASNS     | 440    | Leukemia, MESH:D015473 | Arsenic Tr   | 24.53 | 263 |
| CD24     | 1E+08  | Leukemia, MESH:D015473 | Arsenic Tr   | 24.53 | 264 |
| COL11A1  | 1301   | Leukemia, MESH:D015473 | arsenite[Ci  | 24.53 | 156 |
| FHL1     | 2273   | Leukemia, MESH:D015473 | Arsenic Tr   | 24.53 | 262 |
| IL7R     | 3575   | Leukemia, MESH:D015473 | Arsenic ar:  | 24.53 | 19  |
| KRT5     | 3852   | Leukemia, MESH:D015473 | Arsenic ar:  | 24.53 | 161 |
| NR1H3    | 10062  | Leukemia, MESH:D015473 | Arsenic Ar   | 24.53 | 264 |
| OGDH     | 4967   | Leukemia, MESH:D015473 | alpha-Toc    | 24.53 | 161 |
| ACAN     | 176    | Leukemia, MESH:D015473 | caffeic aci  | 24.52 | 159 |
| AMPD3    | 272    | Leukemia, MESH:D015470 | Calcitriol[C | 24.51 | 27  |
| CACNA1C  | 775    | Leukemia, MESH:D015470 | Arsenic Tr   | 24.51 | 25  |
| CTTN     | 2017   | Leukemia, MESH:D015470 | Air Polluta  | 24.51 | 36  |
| EEF1E1   | 9521   | Leukemia, MESH:D015473 | Arsenic Ar   | 24.51 | 268 |
| GLI1     | 2735   | Leukemia, MESH:D015470 | Arsenic Tr   | 24.51 | 29  |
| MBD2     | 8932   | Leukemia, MESH:D015473 | Arsenic Ar   | 24.51 | 264 |
| MYBL1    | 4603   | Leukemia, MESH:D015470 | Arsenic Tr   | 24.51 | 22  |
| MYH14    | 79784  | Leukemia, MESH:D015473 | Arsenic ar:  | 24.51 | 14  |
| HSP90AB1 | 3326   | Leukemia, MESH:D015470 | Arsenic Tr   | 24.48 | 26  |
| PODXL    | 5420   | Leukemia, MESH:D015473 | Arsenic Ar   | 24.47 | 269 |
| RNF113A  | 7737   | Leukemia, MESH:D015470 | Dronabinc    | 24.47 | 19  |
| SHC1     | 6464   | Leukemia, MESH:D015473 | Arsenic Ar   | 24.47 | 266 |
| SPC25    | 57405  | Leukemia, MESH:D015473 | Arsenic Ar   | 24.47 | 267 |
| ANKRD36  | 57730  | Leukemia, MESH:D015470 | Dexameth     | 24.46 | 9   |
| ATP5O    | 28080  | Leukemia, MESH:D015470 | Dexameth     | 24.46 | 22  |
| BGLAP    | 632    | Leukemia, MESH:D007948 | 2-(2-amin    | 24.46 | 3   |
| C1ORF116 | 79098  | Leukemia, MESH:D015470 | Calcitriol[C | 24.46 | 12  |
| CWF19L1  | 55280  | Leukemia, MESH:D015470 | Arsenic Tr   | 24.46 | 20  |
| GTF2E1   | 2960   | Leukemia, MESH:D015470 | Air Polluta  | 24.46 | 8   |
| MALL     | 7851   | Leukemia, MESH:D015470 | Arsenic Tr   | 24.46 | 15  |
| SDHAF1   | 644096 | Leukemia, MESH:D015470 | Dexameth     | 24.46 | 16  |
| CDC73    | 79577  | Leukemia, MESH:D015470 | Arsenic Tr   | 24.45 | 23  |
| CREBBP   | 1387   | Leukemia, MESH:D015473 | alpha-Toc    | 24.45 | 269 |
| DENND1B  | 163486 | Leukemia, MESH:D015470 | Calcitriol[C | 24.45 | 15  |
| FAM171A  | 221061 | Leukemia, MESH:D015470 | Dexameth     | 24.45 | 25  |
| KRT6A    | 3853   | Leukemia, MESH:D015470 | Alitretinoi  | 24.45 | 23  |
| MYOM1    | 8736   | Leukemia, MESH:D015470 | Arsenic Tr   | 24.45 | 20  |
| NAIP     | 4671   | Leukemia, MESH:D015470 | Air Polluta  | 24.45 | 16  |
| RHOH     | 399    | Leukemia, MESH:D015470 | Air Polluta  | 24.45 | 15  |
| SCD1     | 20249  | Leukemia, MESH:D015470 | Arsenic Tr   | 24.45 | 28  |
| SPTY2D1  | 144108 | Leukemia, MESH:D015470 | Bortezomi    | 24.45 | 15  |
| TMEM107  | 84314  | Leukemia, MESH:D015470 | Arsenic Tr   | 24.45 | 36  |
| GNAI3    | 2773   | Leukemia, MESH:D015470 | Arsenic Tr   | 24.44 | 22  |
| IL13RA2  | 3598   | Leukemia, MESH:D015470 | Dexameth     | 24.44 | 22  |
| NEFM     | 4741   | Leukemia, MESH:D015470 | Alitretinoi  | 24.44 | 27  |
| PADI2    | 11240  | Leukemia, MESH:D015470 | Dexameth     | 24.44 | 11  |

|          |        |                            |              |       |     |
|----------|--------|----------------------------|--------------|-------|-----|
| PLXDC2   | 84898  | Leukemia, MESH:D015470     | Calcitriol[C | 24.44 | 16  |
| PLXNB2   | 23654  | Leukemia, MESH:D015470     | Air Polluta  | 24.44 | 23  |
| PPBP     | 5473   | Leukemia, MESH:D015470     | Arsenic Tr   | 24.44 | 38  |
| RASL11B  | 65997  | Leukemia, MESH:D015470     | Calcitriol[C | 24.44 | 22  |
| RHOQ     | 23433  | Leukemia, MESH:D015470     | Arsenic Tr   | 24.44 | 21  |
| SLC16A6  | 9120   | Leukemia, MESH:D015470     | Dasatinib    | 24.44 | 36  |
| SMAD4    | 4089   | Leukemia, MESH:D015470     | Dexameth     | 24.44 | 22  |
| SPARC    | 6678   | Leukemia, MESH:D015473     | Arsenic ar   | 24.44 | 164 |
| TET2     | 54790  | Leukemia, MESH:D015470     | Arsenic Tr   | 24.44 | 21  |
| CTSG     | 1511   | Leukemia, MESH:D015473     | Arsenic Ar   | 24.43 | 261 |
| ADRB1    | 153    | Leukemia, MESH:D015470     | Azacitidin   | 24.42 | 30  |
| CYP2C9   | 1559   | Leukemia, MESH:D015473     | Cholesterc   | 24.42 | 156 |
| GH1      | 2688   | Leukemia, MESH:D015470     | Alitreteinol | 24.42 | 24  |
| HLA-A    | 3105   | Leukemia, MESH:D015473     | Arsenic Tr   | 24.42 | 261 |
| MME      | 4311   | Leukemia, MESH:D015470     | Doxorubic    | 24.42 | 20  |
| POLD3    | 10714  | Leukemia, MESH:D015473     | Arsenic Tr   | 24.42 | 264 |
| SLC2A3   | 6515   | Leukemia, MESH:D015473     | Antimony     | 24.4  | 264 |
| ADAM4    | 11498  | Leukemia, MESH:D015470     | Cyclophos    | 24.36 | 11  |
| BCAT1    | 586    | Leukemia, MESH:D015473     | arsenite D   | 24.36 | 162 |
| COL11A1  | 1301   | Leukemia, MESH:D015470     | Calcitriol[C | 24.36 | 30  |
| COX4I1   | 1327   | Leukemia, MESH:D015473     | Arsenic Tr   | 24.36 | 267 |
| CTSH     | 1512   | Leukemia, MESH:D015473     | Arsenic Tr   | 24.36 | 266 |
| GNAS     | 2778   | Leukemia, MESH:D015470     | Benzene C    | 24.36 | 33  |
| LTB      | 4050   | Leukemia, MESH:D015470     | Arsenic Tr   | 24.36 | 36  |
| OLR1     | 4973   | Leukemia, MESH:D015473     | Arsenic Tr   | 24.36 | 265 |
| RAD51    | 5888   | Leukemia, MESH:D007948     | 2-(2-amin    | 24.36 | 3   |
| B4GALT1  | 2683   | Leukemia, MESH:D015470     | Calcitriol[C | 24.35 | 18  |
| CDON     | 50937  | Leukemia, MESH:D015470     | Dexameth     | 24.35 | 16  |
| FZD4     | 8322   | Leukemia, MESH:D015470     | Decitabine   | 24.35 | 19  |
| GFPT2    | 9945   | Leukemia, MESH:D015470     | Calcitriol[C | 24.35 | 18  |
| LIFR     | 3977   | Leukemia, MESH:D015473     | Arsenic ar   | 24.35 | 161 |
| PEG10    | 23089  | Leukemia, MESH:D015470     | Decitabine   | 24.35 | 23  |
| PSMB2    | 5690   | Leukemia, MESH:D015470     | Carboplati   | 24.35 | 19  |
| PSMD7    | 5713   | Leukemia, MESH:D015470     | Arsenic Tr   | 24.35 | 21  |
| PTPRO    | 5800   | Leukemia, MESH:D015470     | Arsenic Tr   | 24.35 | 20  |
| TP53BP1  | 7158   | Leukemia, MESH:D015470     | Bortezomi    | 24.35 | 26  |
| TRIB2    | 28951  | Leukemia, MESH:D015470     | Arsenic Tr   | 24.35 | 29  |
| C5ORF22  | 55322  | Leukemia, MESH:D015470     | Doxorubic    | 24.34 | 21  |
| CHRD1    | 91851  | Leukemia, MESH:D015473     | Arsenic Tr   | 24.34 | 264 |
| KEAP1    | 9817   | Leukemia, MESH:D015473     | Arsenic Ar   | 24.34 | 267 |
| PRKCZ    | 5590   | Leukemia, MESH:D004915     | Cytarabine   | 24.34 | 2   |
| PRPH     | 5630   | Leukemia, MESH:D015473     | Arsenic ar   | 24.34 | 159 |
| C11ORF71 | 54494  | Leukemia, MESH:D015470     | Dexameth     | 24.33 | 13  |
| CARD10   | 29775  | Leukemia, MESH:D015473     | Arsenic Ca   | 24.33 | 157 |
| CDCA7L   | 55536  | Leukemia, MESH:D015473     | Arsenic Ca   | 24.33 | 159 |
| CRP      | 1401   | Leukemia, MESH:D015470     | Arsenic Tr   | 24.33 | 36  |
| VOPP1    | 81552  | Leukemia, MESH:D01marker/m | Benzene C    | 24.32 | 29  |
| ANKRD22  | 118932 | Leukemia, MESH:D015470     | Calcitriol[C | 24.32 | 12  |
| COMMD1   | 51397  | Leukemia, MESH:D015470     | Decitabine   | 24.32 | 18  |
| DHX37    | 57647  | Leukemia, MESH:D015470     | Dexameth     | 24.32 | 14  |
| FITM2    | 128486 | Leukemia, MESH:D015470     | Dexameth     | 24.32 | 16  |
| HRG      | 3273   | Leukemia, MESH:D015470     | Arsenic Tr   | 24.32 | 23  |
| MBTD1    | 54799  | Leukemia, MESH:D015470     | Calcitriol[C | 24.32 | 84  |
| MYO9A    | 4649   | Leukemia, MESH:D015470     | Dexameth     | 24.32 | 15  |
| NFS1     | 9054   | Leukemia, MESH:D015470     | Dexameth     | 24.32 | 17  |
| PLA2G4A  | 5321   | Leukemia, MESH:D015473     | Arsenic Tr   | 24.32 | 263 |
| PPP1R18  | 170954 | Leukemia, MESH:D015470     | Decitabine   | 24.32 | 23  |
| RSU1     | 6251   | Leukemia, MESH:D015470     | Arsenic Tr   | 24.32 | 15  |

|          |        |                            |              |       |     |
|----------|--------|----------------------------|--------------|-------|-----|
| SIRT4    | 23409  | Leukemia, MESH:D015470     | Decitabine   | 24.32 | 17  |
| STRAP    | 11171  | Leukemia, MESH:D015470     | Air Polluta  | 24.32 | 34  |
| UBL3     | 5412   | Leukemia, MESH:D015470     | Cytarabine   | 24.32 | 80  |
| ROCK1    | 6093   | Leukemia, MESH:D01marker/m | Arsenic Ar   | 24.3  | 269 |
| PRKAA1   | 5562   | Leukemia, MESH:D015470     | Arsenic Tr   | 24.3  | 26  |
| RAD50    | 10111  | Leukemia, MESH:D015470     | Arsenic Tr   | 24.29 | 37  |
| SPC25    | 57405  | Leukemia, MESH:D015470     | Arsenic Tr   | 24.29 | 21  |
| LIF      | 3976   | Leukemia, MESH:D015473     | Arsenic Tr   | 24.28 | 262 |
| PDGFRB   | 5159   | Leukemia, MESH:D007948     | 2-(2-amin    | 24.28 | 4   |
| PHGDH    | 26227  | Leukemia, MESH:D015473     | Arsenic Tr   | 24.28 | 264 |
| FLT3     | 2322   | Leukemia, MESH:D01marker/m | Arsenic Tr   | 24.26 | 263 |
| LPP      | 4026   | Leukemia, MESH:D01marker/m | Calcitriol C | 24.25 | 19  |
| ANKRD11  | 29123  | Leukemia, MESH:D015470     | Arsenic Tr   | 24.25 | 18  |
| AP1S1    | 1174   | Leukemia, MESH:D015470     | Arsenic Tr   | 24.25 | 24  |
| AQP1     | 358    | Leukemia, MESH:D015470     | Arsenic Tr   | 24.25 | 92  |
| C12ORF57 | 113246 | Leukemia, MESH:D015470     | Doxorubic    | 24.25 | 14  |
| CH25H    | 9023   | Leukemia, MESH:D015470     | Dexameth     | 24.25 | 17  |
| CNBP     | 7555   | Leukemia, MESH:D015473     | Antimony     | 24.25 | 263 |
| COMTD1   | 118881 | Leukemia, MESH:D015470     | Dexameth     | 24.25 | 20  |
| CYP27A1  | 1593   | Leukemia, MESH:D015470     | Alitretinoin | 24.25 | 82  |
| DENND10  | 404636 | Leukemia, MESH:D015470     | Air Polluta  | 24.25 | 13  |
| FETUB    | 26998  | Leukemia, MESH:D015470     | Dexameth     | 24.25 | 16  |
| KMO      | 8564   | Leukemia, MESH:D015470     | Air Polluta  | 24.25 | 81  |
| KNTC1    | 9735   | Leukemia, MESH:D015470     | Calcitriol C | 24.25 | 14  |
| MARCHF4  | 57574  | Leukemia, MESH:D015470     | Arsenic Tr   | 24.25 | 15  |
| MSX1     | 4487   | Leukemia, MESH:D015470     | Cytarabine   | 24.25 | 90  |
| PCBD2    | 84105  | Leukemia, MESH:D015470     | Doxorubic    | 24.25 | 14  |
| PLD3     | 23646  | Leukemia, MESH:D015473     | Arsenic Tr   | 24.25 | 263 |
| PSME4    | 23198  | Leukemia, MESH:D015470     | Arsenic Tr   | 24.25 | 35  |
| SESN3    | 143686 | Leukemia, MESH:D015470     | Cytarabine   | 24.25 | 86  |
| TUBB3    | 10381  | Leukemia, MESH:D015470     | 2-(2-chlor   | 24.25 | 91  |
| TRIB3    | 57761  | Leukemia, MESH:D01marker/m | Arsenic Tr   | 24.24 | 262 |
| FZD5     | 7855   | Leukemia, MESH:D015473     | Arsenic Tr   | 24.24 | 261 |
| IRF4     | 3662   | Leukemia, MESH:D015473     | Arsenic Ar   | 24.24 | 161 |
| TNFRSF10 | 8793   | Leukemia, MESH:D015473     | Arsenic Ar   | 24.24 | 266 |
| CCND3    | 896    | Leukemia, MESH:D007948     | 2-(2-amin    | 24.23 | 4   |
| ARHGDI   | 397    | Leukemia, MESH:D015470     | Arsenic Tr   | 24.22 | 92  |
| CALD1    | 800    | Leukemia, MESH:D015470     | Arsenic Tr   | 24.22 | 28  |
| DDAH1    | 23576  | Leukemia, MESH:D015470     | Dexameth     | 24.22 | 17  |
| DLG4     | 1742   | Leukemia, MESH:D015470     | Decitabine   | 24.22 | 25  |
| MSH6     | 2956   | Leukemia, MESH:D015470     | Bortezomi    | 24.22 | 34  |
| SNAI1    | 6615   | Leukemia, MESH:D007948     | 2-(2-amin    | 24.22 | 3   |
| TAGLN2   | 8407   | Leukemia, MESH:D015470     | Bortezomi    | 24.22 | 19  |
| TNFAIP2  | 7127   | Leukemia, MESH:D015470     | Calcitriol C | 24.22 | 21  |
| AIMP2    | 7965   | Leukemia, MESH:D015470     | Doxorubic    | 24.19 | 18  |
| ATP10D   | 57205  | Leukemia, MESH:D015470     | Cytarabine   | 24.19 | 82  |
| CBFA2T3  | 863    | Leukemia, MESH:D015470     | Dexameth     | 24.19 | 11  |
| DESI2    | 51029  | Leukemia, MESH:D015470     | Arsenic Tr   | 24.19 | 29  |
| GABRP    | 2568   | Leukemia, MESH:D015470     | Calcitriol C | 24.19 | 80  |
| GBP3     | 2635   | Leukemia, MESH:D015470     | Air Polluta  | 24.19 | 15  |
| GJB3     | 2707   | Leukemia, MESH:D015470     | Arsenic Tr   | 24.19 | 24  |
| GKAP1    | 80318  | Leukemia, MESH:D015470     | Bortezomi    | 24.19 | 11  |
| HLA-E    | 3133   | Leukemia, MESH:D015470     | Arsenic Tr   | 24.19 | 28  |
| ITGA11   | 22801  | Leukemia, MESH:D015470     | Calcitriol C | 24.19 | 10  |
| MGAT4B   | 11282  | Leukemia, MESH:D015470     | Arsenic Tr   | 24.19 | 16  |
| MUC1     | 4582   | Leukemia, MESH:D015473     | Arsenic ca   | 24.19 | 158 |
| MYOM2    | 9172   | Leukemia, MESH:D015470     | Chloroqui    | 24.19 | 58  |
| NDUFB9   | 4715   | Leukemia, MESH:D015470     | Dexameth     | 24.19 | 16  |

|          |          |                        |              |       |     |
|----------|----------|------------------------|--------------|-------|-----|
| ORAI1    | 84876    | Leukemia, MESH:D015470 | Arsenic Tr   | 24.19 | 18  |
| PLAGL2   | 5326     | Leukemia, MESH:D015470 | Arsenic Tr   | 24.19 | 15  |
| SOX7     | 83595    | Leukemia, MESH:D015470 | Doxorubic    | 24.19 | 16  |
| UNKL     | 64718    | Leukemia, MESH:D015470 | Bortezomi    | 24.19 | 10  |
| ADGRD1   | 283383   | Leukemia, MESH:D015470 | Dexameth     | 24.18 | 15  |
| CXCL12   | 6387     | Leukemia, MESH:D015473 | Arsenic Tr   | 24.18 | 261 |
| AIFM2    | 84883    | Leukemia, MESH:D015470 | Bortezomi    | 24.16 | 19  |
| CCN4     | 8840     | Leukemia, MESH:D015473 | Arsenic Ar   | 24.16 | 263 |
| CLSPN    | 63967    | Leukemia, MESH:D015473 | Arsenic Tr   | 24.16 | 262 |
| DRAM1    | 55332    | Leukemia, MESH:D015470 | Decitabine   | 24.16 | 27  |
| GJA4     | 2701     | Leukemia, MESH:D015473 | Arsenic Ar   | 24.16 | 265 |
| JADE1    | 79960    | Leukemia, MESH:D015470 | Dexameth     | 24.16 | 14  |
| MYO10    | 4651     | Leukemia, MESH:D015470 | Doxorubic    | 24.16 | 18  |
| TFF3     | 7033     | Leukemia, MESH:D015470 | Cytarabine   | 24.16 | 84  |
| TRA2A    | 29896    | Leukemia, MESH:D015470 | Arsenic Tr   | 24.16 | 22  |
| ARRDC3   | 57561    | Leukemia, MESH:D015470 | Arsenic Tr   | 24.15 | 24  |
| CASP12   | 1.01E+08 | Leukemia, MESH:D007948 | 2-(2-amin    | 24.15 | 3   |
| CYP26B1  | 56603    | Leukemia, MESH:D015473 | Arsenic ar:  | 24.13 | 161 |
| GREB1    | 9687     | Leukemia, MESH:D015473 | Arsenic Ar   | 24.13 | 162 |
| MAP3K8   | 1326     | Leukemia, MESH:D015473 | Arsenic ar:  | 24.13 | 159 |
| TAF45    | 25817    | Leukemia, MESH:D015473 | Arsenic Ar   | 24.13 | 261 |
| LGALS3   | 3958     | Leukemia, MESH:D015473 | Arsenic Tr   | 24.12 | 264 |
| RGS2     | 5997     | Leukemia, MESH:D015473 | arsenic dis  | 24.12 | 265 |
| MMP2     | 4313     | Leukemia, MESH:D015473 | Arsenic Ar   | 24.11 | 267 |
| TNFRSF11 | 4982     | Leukemia, MESH:D007948 | 2-(2-amin    | 24.11 | 3   |
| CISH     | 1154     | Leukemia, MESH:D015470 | Benzene B    | 24.08 | 32  |
| COL12A1  | 1303     | Leukemia, MESH:D015470 | Alitretinoi  | 24.08 | 18  |
| DNAJB1   | 3337     | Leukemia, MESH:D015473 | Antimony     | 24.08 | 264 |
| LMNA     | 4000     | Leukemia, MESH:D015473 | Arsenic Ar   | 24.08 | 162 |
| PRKAA2   | 5563     | Leukemia, MESH:D015470 | Dexameth     | 24.08 | 19  |
| TES      | 26136    | Leukemia, MESH:D015470 | Arsenic Tr   | 24.08 | 25  |
| TUBA1A   | 7846     | Leukemia, MESH:D015470 | Alitretinoi  | 24.08 | 20  |
| CD82     | 3732     | Leukemia, MESH:D015470 | Bortezomi    | 24.07 | 17  |
| DCT      | 1638     | Leukemia, MESH:D015470 | Carboplati   | 24.07 | 27  |
| NRIP1    | 8204     | Leukemia, MESH:D015473 | arsenite Ci  | 24.07 | 159 |
| PBX1     | 5087     | Leukemia, MESH:D015470 | Calcitriol C | 24.07 | 33  |
| PKIB     | 5570     | Leukemia, MESH:D015473 | Arsenic Ar   | 24.07 | 162 |
| RAD23A   | 5886     | Leukemia, MESH:D015470 | Arsenic Tr   | 24.07 | 85  |
| SKA1     | 220134   | Leukemia, MESH:D015473 | Arsenic ar:  | 24.07 | 160 |
| TBC1D4   | 9882     | Leukemia, MESH:D015470 | Alitretinoi  | 24.07 | 82  |
| TERT     | 7015     | Leukemia, MESH:D007948 | 1,3-benzo    | 24.07 | 3   |
| TLN1     | 7094     | Leukemia, MESH:D015470 | Arsenic Tr   | 24.07 | 25  |
| ACTR3    | 10096    | Leukemia, MESH:D015470 | Arsenic Tr   | 24.06 | 18  |
| ARAP1    | 116985   | Leukemia, MESH:D015470 | Air Polluta  | 24.06 | 23  |
| CASTOR1  | 652968   | Leukemia, MESH:D015470 | Calcitriol C | 24.06 | 14  |
| DNAAF5   | 54919    | Leukemia, MESH:D015470 | Bortezomi    | 24.06 | 11  |
| DNAJC12  | 56521    | Leukemia, MESH:D015470 | Decitabine   | 24.06 | 23  |
| EPB41L1  | 2036     | Leukemia, MESH:D015470 | Arsenic Tr   | 24.06 | 35  |
| FAM171B  | 165215   | Leukemia, MESH:D015470 | Dexameth     | 24.06 | 14  |
| ITPRID2  | 6744     | Leukemia, MESH:D015470 | Arsenic Tr   | 24.06 | 19  |
| LZTS1    | 11178    | Leukemia, MESH:D015470 | Calcitriol C | 24.06 | 17  |
| S1PR3    | 1903     | Leukemia, MESH:D015470 | Decitabine   | 24.06 | 24  |
| SLC14A2  | 8170     | Leukemia, MESH:D015470 | Arsenic Tr   | 24.06 | 21  |
| STX12    | 23673    | Leukemia, MESH:D015470 | Bortezomi    | 24.06 | 14  |
| THBS3    | 7059     | Leukemia, MESH:D015470 | Dasatinib I  | 24.06 | 15  |
| UBE2D4   | 51619    | Leukemia, MESH:D015470 | Dexameth     | 24.06 | 14  |
| ZC3H11A  | 9877     | Leukemia, MESH:D015470 | Arsenic Tr   | 24.06 | 16  |
| AMPH     | 273      | Leukemia, MESH:D015470 | Dexameth     | 24.05 | 10  |

|          |        |                             |              |       |     |
|----------|--------|-----------------------------|--------------|-------|-----|
| C1ORF54  | 79630  | Leukemia, MESH:D015470      | Decitabine   | 24.05 | 17  |
| CC2D1A   | 54862  | Leukemia, MESH:D015470      | Dexameth     | 24.05 | 14  |
| DENND4B  | 9909   | Leukemia, MESH:D015470      | Bortezomi    | 24.05 | 15  |
| GLCE     | 26035  | Leukemia, MESH:D015470      | Doxorubic    | 24.05 | 16  |
| MDM1     | 56890  | Leukemia, MESH:D015470      | Calcitriol C | 24.05 | 15  |
| PBX2     | 5089   | Leukemia, MESH:D015470      | Dexameth     | 24.05 | 17  |
| PLPPR2   | 64748  | Leukemia, MESH:D015470      | Dexameth     | 24.05 | 14  |
| PNMA1    | 9240   | Leukemia, MESH:D015470      | Air Polluta  | 24.05 | 19  |
| SES2     | 83667  | Leukemia, MESH:D015473      | Antineopli   | 24.04 | 157 |
| AHCY     | 191    | Leukemia, MESH:D015473      | Arsenic Ar   | 24.02 | 266 |
| EFEMP1   | 2202   | Leukemia, MESH:D015473      | Anthracyc    | 24.02 | 153 |
| DBI      | 1622   | Leukemia, MESH:D015470      | Bezafibrat   | 24.01 | 20  |
| EPHX2    | 2053   | Leukemia, MESH:D015470      | Air Polluta  | 24.01 | 27  |
| FMO5     | 2330   | Leukemia, MESH:D015470      | Calcitriol C | 24.01 | 19  |
| NCOR2    | 9612   | Leukemia, MESH:D015470      | Calcitriol C | 24.01 | 13  |
| PSEN1    | 5663   | Leukemia, MESH:D015470      | Air Polluta  | 24.01 | 16  |
| ARNT     | 405    | Leukemia, MESH:D015473      | arsenite Bi  | 24    | 156 |
| CLDN1    | 9076   | Leukemia, MESH:D015473      | Arsenic Ar   | 24    | 265 |
| SOX9     | 6662   | Leukemia, MESH:D015473      | Arsenic ar   | 24    | 161 |
| MND1     | 84057  | Leukemia, MESH:D015473      | Arsenic Tr   | 23.99 | 264 |
| GYPA     | 2993   | Leukemia, MESH:D007948      | Arsenic Tr   | 23.98 | 3   |
| KIAA1958 | 158405 | Leukemia, MESH:D015470      | Dexameth     | 23.98 | 13  |
| MIR17    | 406952 | Leukemia, MESH:D015473      | Arsenic Tr   | 23.98 | 155 |
| MIR20B   | 574032 | Leukemia, MESH:D015473      | Arsenic Tr   | 23.98 | 260 |
| MYH11    | 4629   | Leukemia, MESH:D01marker/mi | Dasatinib    | 23.97 | 29  |
| ADIRF    | 10974  | Leukemia, MESH:D015473      | Arsenic De   | 23.97 | 156 |
| ANK2     | 287    | Leukemia, MESH:D015470      | Air Polluta  | 23.97 | 48  |
| COL21A1  | 81578  | Leukemia, MESH:D015473      | Arsenic Ar   | 23.97 | 264 |
| LAMP3    | 27074  | Leukemia, MESH:D015470      | Decitabine   | 23.97 | 25  |
| PGR      | 5241   | Leukemia, MESH:D015470      | Amsacrine    | 23.97 | 40  |
| PRICKLE1 | 144165 | Leukemia, MESH:D015470      | Cytarabine   | 23.97 | 83  |
| MAP3K1   | 4214   | Leukemia, MESH:D015473      | Arsenic Ca   | 23.96 | 160 |
| SLC7A5   | 8140   | Leukemia, MESH:D015473      | Arsenic Ch   | 23.96 | 160 |
| BLVRB    | 645    | Leukemia, MESH:D015470      | Arsenic Tr   | 23.94 | 29  |
| CBR3     | 874    | Leukemia, MESH:D015470      | alvocidib E  | 23.94 | 45  |
| CIDEA    | 1149   | Leukemia, MESH:D015470      | Arsenic Tr   | 23.94 | 25  |
| IRAK1    | 3654   | Leukemia, MESH:D015470      | Arsenic Tr   | 23.94 | 26  |
| ACTR2    | 10097  | Leukemia, MESH:D015470      | Dexameth     | 23.93 | 14  |
| ADCY4    | 196883 | Leukemia, MESH:D015470      | Dexameth     | 23.93 | 16  |
| AGPAT5   | 55326  | Leukemia, MESH:D015470      | Air Polluta  | 23.93 | 24  |
| EIF4H    | 7458   | Leukemia, MESH:D015470      | Chloroqui    | 23.93 | 81  |
| ELP4     | 26610  | Leukemia, MESH:D015470      | Calcitriol C | 23.93 | 17  |
| F2RL2    | 2151   | Leukemia, MESH:D015470      | Calcitriol C | 23.93 | 15  |
| FAM3C    | 10447  | Leukemia, MESH:D015470      | Alitretinoi  | 23.93 | 10  |
| GABARAP  | 11337  | Leukemia, MESH:D015470      | Dexameth     | 23.93 | 16  |
| GNA11    | 2767   | Leukemia, MESH:D015470      | Arsenic Tr   | 23.93 | 23  |
| H1-10    | 8971   | Leukemia, MESH:D015470      | Doxorubic    | 23.93 | 17  |
| HPDL     | 84842  | Leukemia, MESH:D015470      | Dexameth     | 23.93 | 13  |
| ITSN2    | 50618  | Leukemia, MESH:D015470      | Air Polluta  | 23.93 | 10  |
| MARCHF2  | 51257  | Leukemia, MESH:D015470      | Arsenic Tr   | 23.93 | 20  |
| RRP1B    | 23076  | Leukemia, MESH:D015470      | Air Polluta  | 23.93 | 16  |
| SERINC1  | 57515  | Leukemia, MESH:D015470      | Arsenic Tr   | 23.93 | 20  |
| SLC4A11  | 83959  | Leukemia, MESH:D015470      | Calcitriol C | 23.93 | 24  |
| SNRPA1   | 6627   | Leukemia, MESH:D015470      | Air Polluta  | 23.93 | 14  |
| ST7      | 7982   | Leukemia, MESH:D015470      | Calcitriol C | 23.93 | 23  |
| SUN2     | 25777  | Leukemia, MESH:D015470      | Decitabine   | 23.93 | 25  |
| SWAP70   | 23075  | Leukemia, MESH:D015470      | Arsenic Tr   | 23.93 | 26  |
| TMEM64   | 169200 | Leukemia, MESH:D015470      | Dexameth     | 23.93 | 16  |

|          |        |                              |              |       |     |
|----------|--------|------------------------------|--------------|-------|-----|
| CCNE2    | 9134   | Leukemia, MESH:D015473       | Arsenic ar:  | 23.92 | 164 |
| VDR      | 7421   | Leukemia, MESH:D007948       | 2-(2-amin    | 23.92 | 3   |
| GPB1     | 2852   | Leukemia, MESH:D015473       | Arsenic Tr   | 23.91 | 266 |
| ITGAV    | 3685   | Leukemia, MESH:D015473       | Arsenic Tr   | 23.91 | 263 |
| RGCC     | 28984  | Leukemia, MESH:D015473       | Arsenic Ar   | 23.91 | 263 |
| RSAD2    | 91543  | Leukemia, MESH:D015473       | Arsenic ar:  | 23.91 | 160 |
| SEC31A   | 22872  | Leukemia, MESH:D015473       | Arsenic ar:  | 23.91 | 165 |
| RAD18    | 56852  | Leukemia, MESH:D015473       | Arsenic ar:  | 23.9  | 161 |
| PXDN     | 7837   | Leukemia, MESH:D01marker/m   | Arsenic Tr   | 23.88 | 32  |
| ECI2     | 10455  | Leukemia, MESH:D015470       | Bezafibrat   | 23.88 | 19  |
| ERCC2    | 2068   | Leukemia, MESH:D015470       | Air Polluta  | 23.88 | 35  |
| MAP4     | 4134   | Leukemia, MESH:D015470       | Benzene C    | 23.88 | 32  |
| MRPS18B  | 28973  | Leukemia, MESH:D015470       | Dexameth     | 23.88 | 16  |
| RAD51C   | 5889   | Leukemia, MESH:D015470       | Arsenic Tr   | 23.88 | 23  |
| UGP2     | 7360   | Leukemia, MESH:D015470       | Air Polluta  | 23.88 | 20  |
| COL2A1   | 1280   | Leukemia, MESH:D015470       | Decitabine   | 23.87 | 29  |
| FKBP4    | 2288   | Leukemia, MESH:D015470       | Dexameth     | 23.87 | 20  |
| GREB1    | 9687   | Leukemia, MESH:D015470       | Arsenic Tr   | 23.87 | 24  |
| IDH3A    | 3419   | Leukemia, MESH:D015470       | Bortezomi    | 23.87 | 29  |
| MGST2    | 4258   | Leukemia, MESH:D015470       | Busulfan C   | 23.87 | 20  |
| WNT4     | 54361  | Leukemia, MESH:D015470       | Androgen     | 23.87 | 17  |
| ADGRB3   | 577    | Leukemia, MESH:D015470       | Benzene C    | 23.86 | 90  |
| BAIAP2L2 | 80115  | Leukemia, MESH:D015470       | Calcitriol C | 23.86 | 9   |
| COQ8B    | 79934  | Leukemia, MESH:D015470       | Dexameth     | 23.86 | 13  |
| DNAJC14  | 85406  | Leukemia, MESH:D015470       | Bortezomi    | 23.86 | 14  |
| ELAPOR2  | 222223 | Leukemia, MESH:D015470       | Benzene C    | 23.86 | 23  |
| ERAP2    | 64167  | Leukemia, MESH:D015470       | Air Polluta  | 23.86 | 17  |
| NOX4     | 50507  | Leukemia, MESH:D007948       | 2-(2-amin    | 23.86 | 4   |
| PLPP4    | 196051 | Leukemia, MESH:D015470       | Calcitriol C | 23.86 | 14  |
| PPP1R3D  | 5509   | Leukemia, MESH:D015470       | Arsenic Tr   | 23.86 | 19  |
| PRR3     | 80742  | Leukemia, MESH:D015470       | Arsenic Tr   | 23.86 | 24  |
| RASL10A  | 10633  | Leukemia, MESH:D015470       | Arsenic Tr   | 23.86 | 21  |
| TOR2A    | 27433  | Leukemia, MESH:D015470       | Dexameth     | 23.86 | 10  |
| ANPEP    | 290    | Leukemia, MESH:D015473       | Arsenic Ar   | 23.85 | 265 |
| COL5A2   | 1290   | Leukemia, MESH:D015473       | Arsenic ar:  | 23.85 | 161 |
| KYNU     | 8942   | Leukemia, MESH:D015473       | Arsenic Tr   | 23.85 | 265 |
| SDHA     | 6389   | Leukemia, MESH:D015473       | Arsenic Ar   | 23.85 | 266 |
| ID3      | 3399   | Leukemia, MESH:D015473       | arsenite D   | 23.84 | 158 |
| NDUFA4L1 | 56901  | Leukemia, MESH:D015473       | Arsenic ar:  | 23.84 | 12  |
| OLAH     | 55301  | Leukemia, MESH:D015473       | Arsenic Ca   | 23.84 | 155 |
| MIR16-1  | 406950 | Leukemia, MESH:D01therapeuti | Arsenic Tr   | 23.83 | 261 |
| AXL      | 558    | Leukemia, MESH:D004915       | Cytarabine   | 23.83 | 3   |
| BAX      | 581    | Leukemia, MESH:D004915       | Cytarabine   | 23.83 | 4   |
| EDRF1    | 26098  | Leukemia, MESH:D015473       | Arsenic Tr   | 23.83 | 265 |
| FABP1    | 2168   | Leukemia, MESH:D015470       | Bezafibrat   | 23.83 | 17  |
| IGFBP1   | 3484   | Leukemia, MESH:D015470       | Arsenic Tr   | 23.83 | 28  |
| MMP13    | 4322   | Leukemia, MESH:D007948       | 2-(2-amin    | 23.83 | 3   |
| ADAMTS4  | 9507   | Leukemia, MESH:D015473       | Arsenic Tr   | 23.82 | 263 |
| CDC42EP3 | 10602  | Leukemia, MESH:D015473       | Arsenic Tr   | 23.82 | 264 |
| CIT      | 11113  | Leukemia, MESH:D015473       | Arsenic ar:  | 23.82 | 14  |
| COX6A2   | 1339   | Leukemia, MESH:D015473       | Arsenic Ar   | 23.82 | 263 |
| CRABP1   | 1381   | Leukemia, MESH:D015473       | Arsenic Tr   | 23.82 | 264 |
| EOMES    | 8320   | Leukemia, MESH:D015473       | arsenite C   | 23.82 | 157 |
| KIF14    | 9928   | Leukemia, MESH:D015473       | arsenite C   | 23.82 | 157 |
| MMP9     | 4318   | Leukemia, MESH:D015473       | Arsenic ar:  | 23.82 | 269 |
| NELL2    | 4753   | Leukemia, MESH:D015473       | Calcitriol C | 23.82 | 159 |
| NUDT1    | 4521   | Leukemia, MESH:D015473       | Arsenic ar:  | 23.82 | 161 |
| PCDH17   | 27253  | Leukemia, MESH:D015473       | Arsenic Ar   | 23.82 | 265 |

|          |        |                            |              |       |     |
|----------|--------|----------------------------|--------------|-------|-----|
| WNK1     | 65125  | Leukemia, MESH:D015473     | Arsenic ars  | 23.82 | 162 |
| NUPR1    | 26471  | Leukemia, MESH:D015473     | Arsenic Tr   | 23.81 | 263 |
| SQLE     | 6713   | Leukemia, MESH:D015473     | Antimony     | 23.81 | 262 |
| ALCAM    | 214    | Leukemia, MESH:D015470     | Benzoates    | 23.8  | 14  |
| CDC20    | 991    | Leukemia, MESH:D015473     | Arsenic Ar   | 23.8  | 266 |
| CDC42EP5 | 148170 | Leukemia, MESH:D015470     | Cytarabine   | 23.8  | 83  |
| CDH8     | 1006   | Leukemia, MESH:D015470     | Arsenic Tr   | 23.8  | 29  |
| CHD1     | 1105   | Leukemia, MESH:D015470     | Dexameth     | 23.8  | 15  |
| CHST14   | 113189 | Leukemia, MESH:D015470     | Azacitidine  | 23.8  | 16  |
| CILP     | 8483   | Leukemia, MESH:D015470     | Calcitriol C | 23.8  | 15  |
| CRYBG1   | 202    | Leukemia, MESH:D015470     | Benzene C    | 23.8  | 25  |
| HERC4    | 26091  | Leukemia, MESH:D015470     | Air Polluta  | 23.8  | 14  |
| HTRA1    | 5654   | Leukemia, MESH:D015470     | Cytarabine   | 23.8  | 85  |
| LACC1    | 144811 | Leukemia, MESH:D015470     | Calcitriol C | 23.8  | 15  |
| MSRB2    | 22921  | Leukemia, MESH:D015470     | Arsenic Tr   | 23.8  | 21  |
| MYL12A   | 10627  | Leukemia, MESH:D015470     | Bortezomi    | 23.8  | 19  |
| P2RX2    | 22953  | Leukemia, MESH:D015470     | Alitretinoin | 23.8  | 17  |
| RBM19    | 9904   | Leukemia, MESH:D015470     | Dexameth     | 23.8  | 17  |
| RMI2     | 116028 | Leukemia, MESH:D015470     | Arsenic Tr   | 23.8  | 17  |
| SCHIP1   | 29970  | Leukemia, MESH:D015470     | Bortezomi    | 23.8  | 25  |
| SESN1    | 27244  | Leukemia, MESH:D015473     | Arsenic Tr   | 23.8  | 159 |
| SETD2    | 29072  | Leukemia, MESH:D015470     | Deferoxan    | 23.8  | 14  |
| SSBP3    | 23648  | Leukemia, MESH:D015470     | Arsenic Tr   | 23.8  | 21  |
| THEMIS2  | 9473   | Leukemia, MESH:D015470     | Doxorubic    | 23.8  | 18  |
| UGGT2    | 55757  | Leukemia, MESH:D015470     | Dexameth     | 23.8  | 18  |
| YWHAZ    | 7534   | Leukemia, MESH:D015470     | Arsenic Tr   | 23.8  | 23  |
| PSIP1    | 11168  | Leukemia, MESH:D01marker/m | Decitabine   | 23.79 | 25  |
| ACOT7    | 11332  | Leukemia, MESH:D015470     | Bortezomi    | 23.79 | 15  |
| CDH11    | 1009   | Leukemia, MESH:D015470     | Cytarabine   | 23.79 | 89  |
| CNP      | 1267   | Leukemia, MESH:D015470     | Dexameth     | 23.79 | 16  |
| CXADR    | 1525   | Leukemia, MESH:D015470     | Calcitriol C | 23.79 | 30  |
| DHX9     | 1660   | Leukemia, MESH:D015470     | Arsenic Tr   | 23.79 | 36  |
| EDEM1    | 9695   | Leukemia, MESH:D015470     | Air Polluta  | 23.79 | 21  |
| IPO5     | 3843   | Leukemia, MESH:D015470     | Air Polluta  | 23.79 | 19  |
| IRF8     | 3394   | Leukemia, MESH:D015470     | Benzoates    | 23.79 | 17  |
| MCF2L    | 23263  | Leukemia, MESH:D015470     | Arsenic Tr   | 23.79 | 24  |
| METRNL   | 284207 | Leukemia, MESH:D015470     | Calcitriol C | 23.79 | 13  |
| NDUFS4   | 4724   | Leukemia, MESH:D015470     | Dexameth     | 23.79 | 16  |
| PDHB     | 5162   | Leukemia, MESH:D015470     | Deferoxan    | 23.79 | 16  |
| IL17A    | 3605   | Leukemia, MESH:D007948     | 2-(2-amin    | 23.77 | 3   |
| NCF1     | 653361 | Leukemia, MESH:D007948     | 2-(2-amin    | 23.77 | 3   |
| ANK1     | 286    | Leukemia, MESH:D015473     | Arsenic Ca   | 23.74 | 157 |
| COX6B1   | 1340   | Leukemia, MESH:D015473     | Arsenic ars  | 23.74 | 160 |
| CTBP2    | 1488   | Leukemia, MESH:D015473     | Arsenic Ar   | 23.74 | 265 |
| EEF1B2   | 1933   | Leukemia, MESH:D015473     | Arsenic Ar   | 23.74 | 265 |
| LBP      | 3929   | Leukemia, MESH:D015473     | arsenite Ci  | 23.74 | 158 |
| PDZD2    | 23037  | Leukemia, MESH:D015473     | Arsenic Ar   | 23.74 | 267 |
| TAP2     | 6891   | Leukemia, MESH:D015473     | Arsenic De   | 23.74 | 166 |
| TROAP    | 10024  | Leukemia, MESH:D015473     | Arsenic Ca   | 23.74 | 163 |
| CIRBP    | 1153   | Leukemia, MESH:D015470     | Dexameth     | 23.73 | 21  |
| PTK2     | 5747   | Leukemia, MESH:D015473     | Arsenic ars  | 23.73 | 160 |
| CHD2     | 1106   | Leukemia, MESH:D015470     | Arsenic Tr   | 23.7  | 18  |
| IKBKE    | 9641   | Leukemia, MESH:D015470     | Benzene C    | 23.7  | 55  |
| QSOX1    | 5768   | Leukemia, MESH:D015470     | Arsenic Tr   | 23.7  | 17  |
| AHNAK    | 79026  | Leukemia, MESH:D015473     | arsenite Ci  | 23.69 | 163 |
| CCDC93   | 54520  | Leukemia, MESH:D015473     | arsenite Ci  | 23.69 | 159 |
| CDC42    | 998    | Leukemia, MESH:D015473     | Arsenic Ar   | 23.69 | 267 |
| CENPO    | 79172  | Leukemia, MESH:D015473     | Calcitriol C | 23.69 | 156 |

|           |        |                        |              |       |     |
|-----------|--------|------------------------|--------------|-------|-----|
| DNM1L     | 10059  | Leukemia, MESH:D015470 | Arsenic Tr   | 23.69 | 24  |
| HERPUD1   | 9709   | Leukemia, MESH:D015470 | Benzene C    | 23.69 | 34  |
| LIMD1     | 8994   | Leukemia, MESH:D015473 | Arsenic Ar   | 23.69 | 161 |
| MX1       | 4599   | Leukemia, MESH:D015473 | alvocidib /  | 23.69 | 264 |
| TSC22D3   | 1831   | Leukemia, MESH:D015473 | Antimony     | 23.69 | 265 |
| CAPN3     | 825    | Leukemia, MESH:D015470 | Alitretinoin | 23.68 | 22  |
| CYP4A11   | 1579   | Leukemia, MESH:D015470 | 15-deoxy-    | 23.68 | 13  |
| FAM110C   | 642273 | Leukemia, MESH:D015470 | Calcitriol C | 23.68 | 12  |
| IMPDH1    | 3614   | Leukemia, MESH:D015470 | Dexameth     | 23.68 | 17  |
| LZTFL1    | 54585  | Leukemia, MESH:D015470 | Arsenic Tr   | 23.68 | 31  |
| NAP1L5    | 266812 | Leukemia, MESH:D015470 | Calcitriol C | 23.68 | 10  |
| NEUROG1   | 4762   | Leukemia, MESH:D015473 | Arsenic ars  | 23.68 | 158 |
| NLGN3     | 54413  | Leukemia, MESH:D015470 | Azacitidine  | 23.68 | 17  |
| PCDH1     | 5097   | Leukemia, MESH:D015470 | Calcitriol C | 23.68 | 16  |
| PDZK1IP1  | 10158  | Leukemia, MESH:D015470 | Benzene C    | 23.68 | 26  |
| PPP2R5A   | 5525   | Leukemia, MESH:D015470 | Arsenic Tr   | 23.68 | 21  |
| PSTPIP2   | 9050   | Leukemia, MESH:D015470 | Cytarabine   | 23.68 | 80  |
| RHOJ      | 57381  | Leukemia, MESH:D015470 | Dexameth     | 23.68 | 17  |
| S100A16   | 140576 | Leukemia, MESH:D015470 | Doxorubic    | 23.68 | 19  |
| SAC3D1    | 29901  | Leukemia, MESH:D015470 | Dexameth     | 23.68 | 15  |
| SLC25A11  | 8402   | Leukemia, MESH:D015470 | Air Polluta  | 23.68 | 29  |
| SRPX2     | 27286  | Leukemia, MESH:D015470 | Dexameth     | 23.68 | 16  |
| STARD5    | 80765  | Leukemia, MESH:D015470 | Decitabine   | 23.68 | 20  |
| STXBP2    | 6813   | Leukemia, MESH:D015470 | Dexameth     | 23.68 | 10  |
| TTF2      | 8458   | Leukemia, MESH:D015470 | Dexameth     | 23.68 | 19  |
| ABCB5     | 340273 | Leukemia, MESH:D015470 | Calcitriol C | 23.67 | 15  |
| CTSG      | 1511   | Leukemia, MESH:D015470 | Arsenic Tr   | 23.67 | 22  |
| EXOC6B    | 23233  | Leukemia, MESH:D015470 | Doxorubic    | 23.67 | 14  |
| HSF1      | 3297   | Leukemia, MESH:D007948 | 2-(2-amin    | 23.67 | 3   |
| KIAA1549I | 25758  | Leukemia, MESH:D015470 | Dexameth     | 23.67 | 13  |
| MYRFL     | 196446 | Leukemia, MESH:D015470 | Decitabine   | 23.67 | 15  |
| SMG6      | 23293  | Leukemia, MESH:D015470 | Dexameth     | 23.67 | 15  |
| TMEM200   | 114801 | Leukemia, MESH:D015470 | Calcitriol C | 23.67 | 78  |
| UBE2Q1    | 55585  | Leukemia, MESH:D015470 | Benzene C    | 23.67 | 28  |
| ECT2      | 1894   | Leukemia, MESH:D015470 | Benzene C    | 23.66 | 32  |
| FAM107B   | 83641  | Leukemia, MESH:D015473 | Arsenic Ar   | 23.66 | 267 |
| GNAI2     | 2771   | Leukemia, MESH:D015470 | Dexameth     | 23.66 | 19  |
| PAX6      | 5080   | Leukemia, MESH:D015470 | Benzene C    | 23.66 | 104 |
| PRC1      | 9055   | Leukemia, MESH:D004915 | Cytarabine   | 23.66 | 2   |
| RFX8      | 731220 | Leukemia, MESH:D015470 | Calcitriol C | 23.66 | 9   |
| SAMD4A    | 23034  | Leukemia, MESH:D015473 | Arsenic ars  | 23.66 | 160 |
| SPTLC2    | 9517   | Leukemia, MESH:D015473 | Arsenic Tr   | 23.66 | 261 |
| AKR1C2    | 1646   | Leukemia, MESH:D015470 | Arsenic Tr   | 23.65 | 52  |
| C8ORF34   | 116328 | Leukemia, MESH:D015470 | Calcitriol C | 23.65 | 7   |
| CYP2D6    | 1565   | Leukemia, MESH:D015470 | Arsenic Tr   | 23.65 | 37  |
| DHRS4-A'  | 55449  | Leukemia, MESH:D015470 | Decitabine   | 23.65 | 19  |
| SNAI1     | 6615   | Leukemia, MESH:D015473 | Arsenic Ar   | 23.65 | 266 |
| BMP7      | 655    | Leukemia, MESH:D015473 | arsenite Ci  | 23.64 | 160 |
| IL1R2     | 7850   | Leukemia, MESH:D015473 | Arsenic Ar   | 23.64 | 162 |
| MSH2      | 4436   | Leukemia, MESH:D015473 | Arsenic Ar   | 23.64 | 264 |
| AKR1B10   | 57016  | Leukemia, MESH:D015473 | Antimony     | 23.62 | 188 |
| CBL       | 867    | Leukemia, MESH:D015470 | Arsenic Tr   | 23.61 | 23  |
| FAM162A   | 26355  | Leukemia, MESH:D015470 | Dexameth     | 23.61 | 16  |
| FAM83D    | 81610  | Leukemia, MESH:D015470 | Calcitriol C | 23.61 | 20  |
| HNRNPAE   | 3182   | Leukemia, MESH:D015470 | Dexameth     | 23.61 | 15  |
| NAV2      | 89797  | Leukemia, MESH:D015470 | Cytarabine   | 23.61 | 79  |
| PCDH7     | 5099   | Leukemia, MESH:D015470 | Calcitriol C | 23.61 | 81  |
| WFDC2     | 10406  | Leukemia, MESH:D015470 | Calcitriol C | 23.61 | 22  |



|          |        |                        |              |       |     |
|----------|--------|------------------------|--------------|-------|-----|
| ZYX      | 7791   | Leukemia, MESH:D015470 | Calcitriol E | 23.61 | 18  |
| ITGAV    | 3685   | Leukemia, MESH:D015470 | Arsenic Tr   | 23.59 | 20  |
| MAP1B    | 4131   | Leukemia, MESH:D015470 | Arsenic Tr   | 23.59 | 49  |
| MIR21    | 406991 | Leukemia, MESH:D015473 | Arsenic Ar   | 23.59 | 270 |
| PMP22    | 5376   | Leukemia, MESH:D015473 | Arsenic Cy   | 23.59 | 162 |
| RNASEH2, | 10535  | Leukemia, MESH:D015473 | Antimony     | 23.59 | 262 |
| RPS27A   | 6233   | Leukemia, MESH:D015473 | arsenic dis  | 23.59 | 264 |
| SLC1A1   | 6505   | Leukemia, MESH:D015473 | arsenite Ca  | 23.59 | 162 |
| ATIC     | 471    | Leukemia, MESH:D015473 | Arsenic Tr   | 23.58 | 262 |
| COL5A3   | 50509  | Leukemia, MESH:D015473 | arsenite Bi  | 23.58 | 155 |
| FAM20C   | 56975  | Leukemia, MESH:D015473 | Arsenic Ar   | 23.58 | 264 |
| JAM2     | 58494  | Leukemia, MESH:D015473 | Arsenic Ar   | 23.58 | 170 |
| KALRN    | 8997   | Leukemia, MESH:D015473 | Arsenic Ar   | 23.58 | 162 |
| KCNN2    | 3781   | Leukemia, MESH:D015473 | Arsenic Tr   | 23.58 | 265 |
| NRG1     | 3084   | Leukemia, MESH:D015473 | Arsenic Ar   | 23.58 | 266 |
| ZWILCH   | 55055  | Leukemia, MESH:D015473 | arsenite Ci  | 23.58 | 158 |
| AQP2     | 359    | Leukemia, MESH:D015470 | Chloroqui    | 23.56 | 16  |
| FAM98A   | 25940  | Leukemia, MESH:D015470 | Benzene E    | 23.56 | 28  |
| HIRIP3   | 8479   | Leukemia, MESH:D015470 | Calcitriol E | 23.56 | 11  |
| MBTPS1   | 8720   | Leukemia, MESH:D015470 | Dexameth     | 23.56 | 18  |
| NOL6     | 65083  | Leukemia, MESH:D015470 | Arsenic Tr   | 23.56 | 18  |
| DMKN     | 93099  | Leukemia, MESH:D015470 | Calcitriol E | 23.55 | 11  |
| FUT11    | 170384 | Leukemia, MESH:D015473 | Arsenic Tr   | 23.55 | 262 |
| HUWE1    | 10075  | Leukemia, MESH:D015470 | Arsenic Tr   | 23.55 | 22  |
| MAN2B2   | 23324  | Leukemia, MESH:D015470 | Cyclophos    | 23.55 | 22  |
| OSBPL8   | 114882 | Leukemia, MESH:D015470 | Arsenic Tr   | 23.55 | 17  |
| SYTL5    | 94122  | Leukemia, MESH:D015470 | (+)-JQ1 co   | 23.55 | 15  |
| CASP8    | 841    | Leukemia, MESH:D004915 | Cytarabine   | 23.54 | 3   |
| NCF2     | 4688   | Leukemia, MESH:D015473 | Arsenic Tr   | 23.54 | 268 |
| SLC16A3  | 9123   | Leukemia, MESH:D015473 | Arsenic Tr   | 23.54 | 269 |
| SLC29A1  | 2030   | Leukemia, MESH:D015473 | Arsenic Ar   | 23.54 | 268 |
| ACACB    | 32     | Leukemia, MESH:D015473 | Arsenic Ar   | 23.53 | 160 |
| CCDC80   | 151887 | Leukemia, MESH:D015470 | Calcitriol E | 23.53 | 17  |
| DAG1     | 1605   | Leukemia, MESH:D015470 | Arsenic Tr   | 23.53 | 22  |
| EBF1     | 1879   | Leukemia, MESH:D015470 | Dexameth     | 23.53 | 20  |
| EIF3A    | 8661   | Leukemia, MESH:D015470 | Dexameth     | 23.53 | 25  |
| FAM13A   | 10144  | Leukemia, MESH:D015470 | Dexameth     | 23.53 | 18  |
| HAL      | 3034   | Leukemia, MESH:D015470 | Air Polluta  | 23.53 | 21  |
| HSDL2    | 84263  | Leukemia, MESH:D015470 | Decitabine   | 23.53 | 23  |
| KPNB1    | 3837   | Leukemia, MESH:D015470 | Calcitriol E | 23.53 | 19  |
| PAK1     | 5058   | Leukemia, MESH:D015470 | Air Polluta  | 23.53 | 18  |
| TBL1XR1  | 79718  | Leukemia, MESH:D015470 | Dexameth     | 23.53 | 19  |
| TXN2     | 25828  | Leukemia, MESH:D015470 | Air Polluta  | 23.53 | 32  |
| WWOX     | 51741  | Leukemia, MESH:D015470 | Arsenic Tr   | 23.53 | 23  |
| YWHAQ    | 10971  | Leukemia, MESH:D015470 | Arsenic Tr   | 23.53 | 37  |
| ABCB11   | 8647   | Leukemia, MESH:D015470 | Allopurinc   | 23.52 | 17  |
| BCL2L1   | 598    | Leukemia, MESH:D007948 | 2-(2-amin    | 23.52 | 4   |
| ARHGAP5  | 394    | Leukemia, MESH:D015473 | Arsenic Tr   | 23.5  | 157 |
| BBC3     | 27113  | Leukemia, MESH:D007948 | Arsenic Tr   | 23.5  | 4   |
| BCOR     | 54880  | Leukemia, MESH:D015473 | arsenite D   | 23.5  | 158 |
| CSF3     | 1440   | Leukemia, MESH:D015473 | Arsenic Tr   | 23.5  | 265 |
| EMP2     | 2013   | Leukemia, MESH:D015473 | Arsenic Tr   | 23.5  | 262 |
| FGD4     | 121512 | Leukemia, MESH:D015473 | Arsenic Ca   | 23.5  | 159 |
| MAGI1    | 9223   | Leukemia, MESH:D015473 | Arsenic Ar   | 23.5  | 161 |
| RPS6     | 6194   | Leukemia, MESH:D007948 | 2-(2-amin    | 23.5  | 3   |
| DCLRE1A  | 9937   | Leukemia, MESH:D015470 | Dexameth     | 23.49 | 14  |
| DCLRE1B  | 64858  | Leukemia, MESH:D015470 | Dexameth     | 23.49 | 15  |
| EEFSEC   | 60678  | Leukemia, MESH:D015470 | Arsenic Tr   | 23.49 | 19  |

|          |        |                            |              |       |     |
|----------|--------|----------------------------|--------------|-------|-----|
| PIGH     | 5283   | Leukemia, MESH:D015470     | Arsenic Tr   | 23.49 | 85  |
| TSPOAP1  | 9256   | Leukemia, MESH:D015470     | Arsenic Tr   | 23.49 | 20  |
| TNFRSF9  | 3604   | Leukemia, MESH:D015473     | Arsenic Tr   | 23.48 | 262 |
| HSP90AB1 | 3326   | Leukemia, MESH:D015473     | Arsenic Tr   | 23.47 | 266 |
| SLC1A3   | 6507   | Leukemia, MESH:D015470     | Calcitriol E | 23.46 | 19  |
| AGT      | 183    | Leukemia, MESH:D015473     | alpha-Toc    | 23.45 | 162 |
| ABCF1    | 23     | Leukemia, MESH:D015470     | arsenic tris | 23.44 | 17  |
| CAB39L   | 81617  | Leukemia, MESH:D015470     | Arsenic Tr   | 23.44 | 83  |
| CCDC6    | 8030   | Leukemia, MESH:D015470     | Arsenic Tr   | 23.44 | 28  |
| CLEC11A  | 6320   | Leukemia, MESH:D015470     | Arsenic Tr   | 23.44 | 15  |
| F11R     | 50848  | Leukemia, MESH:D015470     | Dexameth     | 23.44 | 25  |
| GRK5     | 2869   | Leukemia, MESH:D015470     | Calcitriol C | 23.44 | 82  |
| HACL1    | 26061  | Leukemia, MESH:D015470     | Arsenic Tr   | 23.44 | 41  |
| IVNS1ABP | 10625  | Leukemia, MESH:D015470     | Air Polluta  | 23.44 | 20  |
| MKNK2    | 2872   | Leukemia, MESH:D015470     | Arsenic Tr   | 23.44 | 28  |
| NDUFB5   | 4711   | Leukemia, MESH:D015470     | Dexameth     | 23.44 | 15  |
| NEU1     | 4758   | Leukemia, MESH:D015470     | Dexameth     | 23.44 | 16  |
| NFATC2   | 4773   | Leukemia, MESH:D015470     | Calcitriol C | 23.44 | 14  |
| RAB23    | 51715  | Leukemia, MESH:D015470     | Calcitriol E | 23.44 | 23  |
| TERF1    | 7013   | Leukemia, MESH:D015470     | Arsenic Tr   | 23.44 | 36  |
| TLR1     | 7096   | Leukemia, MESH:D015470     | Air Polluta  | 23.44 | 32  |
| TLR8     | 51311  | Leukemia, MESH:D015470     | Air Polluta  | 23.44 | 13  |
| TPT1     | 7178   | Leukemia, MESH:D015470     | Arsenic Tr   | 23.44 | 37  |
| XPO5     | 57510  | Leukemia, MESH:D015470     | Benzene E    | 23.44 | 28  |
| AKR1B1   | 231    | Leukemia, MESH:D015473     | alpha-Toc    | 23.43 | 266 |
| FUT4     | 2526   | Leukemia, MESH:D015470     | Arsenic Tr   | 23.43 | 20  |
| HTRA2    | 27429  | Leukemia, MESH:D015473     | alvocidib /  | 23.43 | 263 |
| PHF11    | 51131  | Leukemia, MESH:D015470     | Decitabine   | 23.43 | 24  |
| RNF24    | 11237  | Leukemia, MESH:D015470     | Arsenic Tr   | 23.43 | 20  |
| SERPINB8 | 5271   | Leukemia, MESH:D015473     | Arsenic Ca   | 23.43 | 160 |
| SERPINH1 | 871    | Leukemia, MESH:D015473     | Arsenic Ar   | 23.43 | 267 |
| SPTBN1   | 6711   | Leukemia, MESH:D015473     | Arsenic Ar   | 23.43 | 266 |
| UBC      | 7316   | Leukemia, MESH:D015473     | Arsenic Ar   | 23.43 | 265 |
| ZFYVE16  | 9765   | Leukemia, MESH:D015470     | Arsenic Tr   | 23.43 | 24  |
| DSC1     | 1823   | Leukemia, MESH:D015473     | Antimony     | 23.42 | 157 |
| EHHADH   | 1962   | Leukemia, MESH:D015470     | Bezafibrat   | 23.42 | 21  |
| KLF13    | 51621  | Leukemia, MESH:D015473     | Arsenic Ar   | 23.42 | 264 |
| GATA2    | 2624   | Leukemia, MESH:D01marker/m | Arsenic Tr   | 23.39 | 32  |
| ACTN1    | 87     | Leukemia, MESH:D015470     | Decitabine   | 23.39 | 26  |
| LBP      | 3929   | Leukemia, MESH:D015470     | Calcitriol E | 23.39 | 20  |
| IGF2R    | 3482   | Leukemia, MESH:D015473     | Arsenic Ar   | 23.38 | 266 |
| LDHB     | 3945   | Leukemia, MESH:D015473     | alpha-Toc    | 23.38 | 264 |
| TKT      | 7086   | Leukemia, MESH:D015473     | Arsenic Ar   | 23.38 | 266 |
| ATF3     | 467    | Leukemia, MESH:D015473     | Arsenic Ar   | 23.37 | 269 |
| CD14     | 929    | Leukemia, MESH:D007948     | 2-(2-amin    | 23.36 | 3   |
| CD34     | 947    | Leukemia, MESH:D015473     | Arsenic Tr   | 23.36 | 266 |
| MOCOS    | 55034  | Leukemia, MESH:D015473     | Arsenic Tr   | 23.36 | 160 |
| POMZP3   | 22932  | Leukemia, MESH:D015470     | Doxorubic    | 23.36 | 29  |
| AHSG     | 197    | Leukemia, MESH:D015470     | Alitretinoi  | 23.35 | 19  |
| CD40     | 958    | Leukemia, MESH:D015473     | Arsenic Ar   | 23.35 | 268 |
| CHAF1A   | 10036  | Leukemia, MESH:D015473     | Arsenic Ca   | 23.35 | 158 |
| DBN1     | 1627   | Leukemia, MESH:D015470     | Arsenic Tr   | 23.35 | 88  |
| ERCC6L   | 54821  | Leukemia, MESH:D015473     | arsenite C   | 23.35 | 158 |
| KCNQ2    | 3785   | Leukemia, MESH:D015473     | Arsenic ar:  | 23.35 | 156 |
| NEAT1    | 283131 | Leukemia, MESH:D015470     | Arsenic Tr   | 23.35 | 21  |
| PDHA1    | 5160   | Leukemia, MESH:D015470     | Arsenic Tr   | 23.35 | 32  |
| PLA1A    | 51365  | Leukemia, MESH:D015473     | arsenite D   | 23.35 | 9   |
| RUNX3    | 864    | Leukemia, MESH:D015473     | Arsenic ar:  | 23.35 | 159 |

|          |        |                        |              |       |     |
|----------|--------|------------------------|--------------|-------|-----|
| SLIT3    | 6586   | Leukemia, MESH:D015470 | Daunorub     | 23.35 | 43  |
| TRIM25   | 7706   | Leukemia, MESH:D015473 | Arsenic Tr   | 23.35 | 266 |
| VAT1     | 10493  | Leukemia, MESH:D015470 | Dexameth     | 23.35 | 13  |
| CALCA    | 796    | Leukemia, MESH:D015470 | Azacitidine  | 23.34 | 25  |
| ZNF384   | 171017 | Leukemia, MESH:D015470 | Dexameth     | 23.34 | 12  |
| ZNF70    | 7621   | Leukemia, MESH:D015470 | Arsenic Tr   | 23.34 | 19  |
| C1S      | 716    | Leukemia, MESH:D015473 | Arsenic Ca   | 23.33 | 159 |
| DAB2     | 1601   | Leukemia, MESH:D015473 | Arsenic Ar   | 23.33 | 266 |
| RGS16    | 6004   | Leukemia, MESH:D015473 | arsenite Ci  | 23.33 | 161 |
| RORA     | 6095   | Leukemia, MESH:D015473 | Arsenic Ar   | 23.33 | 264 |
| TAT      | 6898   | Leukemia, MESH:D015470 | Arsenic Tr   | 23.33 | 20  |
| ACP3     | 55     | Leukemia, MESH:D015470 | Doxorubic    | 23.32 | 21  |
| CDK8     | 1024   | Leukemia, MESH:D015470 | Decitabine   | 23.32 | 22  |
| CLN3     | 1201   | Leukemia, MESH:D015470 | Air Polluta  | 23.32 | 24  |
| CST7     | 8530   | Leukemia, MESH:D015470 | Benzoates    | 23.32 | 20  |
| EPB41L4B | 54566  | Leukemia, MESH:D015470 | Arsenic Tr   | 23.32 | 16  |
| EYA4     | 2070   | Leukemia, MESH:D015470 | Arsenic Tr   | 23.32 | 20  |
| FGFRL1   | 53834  | Leukemia, MESH:D015470 | Dexameth     | 23.32 | 14  |
| FMO4     | 2329   | Leukemia, MESH:D015470 | Calcitriol C | 23.32 | 83  |
| H2BC4    | 8347   | Leukemia, MESH:D015470 | Air Polluta  | 23.32 | 17  |
| ITGAE    | 3682   | Leukemia, MESH:D015470 | Air Polluta  | 23.32 | 9   |
| LLGL2    | 3993   | Leukemia, MESH:D015470 | Arsenic Tr   | 23.32 | 20  |
| MBD4     | 8930   | Leukemia, MESH:D015470 | Arsenic Tr   | 23.32 | 24  |
| NMI      | 9111   | Leukemia, MESH:D015470 | Azacitidine  | 23.32 | 11  |
| OLFML1   | 283298 | Leukemia, MESH:D015470 | Calcitriol C | 23.32 | 14  |
| PAK3     | 5063   | Leukemia, MESH:D015470 | Arsenic Tr   | 23.32 | 18  |
| PDCD5    | 9141   | Leukemia, MESH:D015470 | Arsenic Tr   | 23.32 | 23  |
| PEX19    | 5824   | Leukemia, MESH:D015470 | Alitretinoin | 23.32 | 15  |
| PSMD13   | 5719   | Leukemia, MESH:D015470 | Arsenic Tr   | 23.32 | 28  |
| RNH1     | 6050   | Leukemia, MESH:D015470 | Arsenic Tr   | 23.32 | 22  |
| RPS21    | 6227   | Leukemia, MESH:D015470 | Arsenic Tr   | 23.32 | 31  |
| SLC16A14 | 151473 | Leukemia, MESH:D015470 | Calcitriol C | 23.32 | 13  |
| SLC16A4  | 9122   | Leukemia, MESH:D015470 | Decitabine   | 23.32 | 21  |
| SLC35G1  | 159371 | Leukemia, MESH:D015470 | Arsenic Tr   | 23.32 | 18  |
| SPTB     | 6710   | Leukemia, MESH:D015470 | Arsenic Tr   | 23.32 | 20  |
| TCIRG1   | 10312  | Leukemia, MESH:D015470 | Doxorubic    | 23.32 | 18  |
| TERT     | 7015   | Leukemia, MESH:D015473 | alpha-Toc    | 23.32 | 267 |
| TRERF1   | 55809  | Leukemia, MESH:D015470 | Arsenic Tr   | 23.32 | 24  |
| UTP20    | 27340  | Leukemia, MESH:D015470 | Dexameth     | 23.32 | 10  |
| ALG9     | 79796  | Leukemia, MESH:D015470 | Doxorubic    | 23.31 | 15  |
| ARHGAP6  | 395    | Leukemia, MESH:D015470 | Dexameth     | 23.31 | 15  |
| EDARADD  | 128178 | Leukemia, MESH:D015470 | Bortezomi    | 23.31 | 11  |
| GGT7     | 2686   | Leukemia, MESH:D015470 | Dexameth     | 23.31 | 13  |
| KBTBD7   | 84078  | Leukemia, MESH:D015470 | Decitabine   | 23.31 | 16  |
| NUDT15   | 55270  | Leukemia, MESH:D015470 | Doxorubic    | 23.31 | 17  |
| PAEP     | 5047   | Leukemia, MESH:D015470 | Azacitidine  | 23.31 | 15  |
| RPRD2    | 23248  | Leukemia, MESH:D015470 | Doxorubic    | 23.31 | 15  |
| SECTM1   | 6398   | Leukemia, MESH:D015470 | Air Polluta  | 23.31 | 20  |
| SLC25A43 | 203427 | Leukemia, MESH:D015470 | Dexameth     | 23.31 | 14  |
| SPRYD4   | 283377 | Leukemia, MESH:D015470 | Doxorubic    | 23.31 | 15  |
| UBXN8    | 7993   | Leukemia, MESH:D015470 | Dronabinc    | 23.31 | 9   |
| UNC50    | 25972  | Leukemia, MESH:D015470 | Dexameth     | 23.31 | 9   |
| ITGAM    | 3684   | Leukemia, MESH:D007948 | 2-(2-amin    | 23.29 | 3   |
| AXL      | 558    | Leukemia, MESH:D015473 | Arsenic ar:  | 23.28 | 160 |
| GPAM     | 57678  | Leukemia, MESH:D015473 | Cholesterc   | 23.28 | 155 |
| ITGB1    | 3688   | Leukemia, MESH:D015473 | Arsenic ar:  | 23.28 | 265 |
| MTMR2    | 8898   | Leukemia, MESH:D015473 | Arsenic Tr   | 23.28 | 262 |
| ABCA5    | 23461  | Leukemia, MESH:D015473 | Arsenic ar:  | 23.27 | 158 |

|         |        |                        |              |       |     |
|---------|--------|------------------------|--------------|-------|-----|
| AMIGO2  | 347902 | Leukemia, MESH:D015473 | Dasatinib    | 23.27 | 153 |
| ANK3    | 288    | Leukemia, MESH:D015470 | Arsenic Tr   | 23.27 | 21  |
| CD81    | 975    | Leukemia, MESH:D015470 | Benzoates    | 23.27 | 18  |
| CELF2   | 10659  | Leukemia, MESH:D015470 | Dexameth     | 23.27 | 25  |
| CLDN11  | 5010   | Leukemia, MESH:D015470 | Arsenic Tr   | 23.27 | 16  |
| DHRS7   | 51635  | Leukemia, MESH:D015470 | Arsenic Tr   | 23.27 | 26  |
| HOPX    | 84525  | Leukemia, MESH:D015470 | Arsenic Tr   | 23.27 | 22  |
| IL13RA2 | 3598   | Leukemia, MESH:D015473 | Arsenic De   | 23.27 | 158 |
| MACF1   | 23499  | Leukemia, MESH:D015470 | Arsenic Tr   | 23.27 | 32  |
| NME2    | 4831   | Leukemia, MESH:D015470 | Alitretinoin | 23.27 | 25  |
| PDE2A   | 5138   | Leukemia, MESH:D015470 | Arsenic Tr   | 23.27 | 27  |
| PDE4DIP | 9659   | Leukemia, MESH:D015470 | Arsenic Tr   | 23.27 | 27  |
| RFC5    | 5985   | Leukemia, MESH:D015473 | arsenite D   | 23.27 | 161 |
| SLAH2   | 6478   | Leukemia, MESH:D015470 | Doxorubic    | 23.27 | 21  |
| SLC4A7  | 9497   | Leukemia, MESH:D015470 | Calcitriol C | 23.27 | 14  |
| YBX3    | 8531   | Leukemia, MESH:D015473 | arsenite Ca  | 23.27 | 157 |
| HSD17B2 | 3294   | Leukemia, MESH:D015470 | Arsenic Tr   | 23.26 | 21  |
| MAFB    | 9935   | Leukemia, MESH:D015470 | Calcitriol C | 23.26 | 19  |
| CYP3A11 | 13112  | Leukemia, MESH:D015473 | alpha-Toc    | 23.25 | 158 |
| CHRM3   | 1131   | Leukemia, MESH:D015473 | Arsenic Ar   | 23.23 | 267 |
| CYP2E1  | 1571   | Leukemia, MESH:D015470 | Androgen     | 23.23 | 44  |
| MCM7    | 4176   | Leukemia, MESH:D015473 | Arsenic Tr   | 23.23 | 262 |
| BCL2    | 596    | Leukemia, MESH:D004915 | Cytarabine   | 23.22 | 4   |
| A2M     | 2      | Leukemia, MESH:D015470 | Arsenic Tr   | 23.21 | 23  |
| MIR106A | 406899 | Leukemia, MESH:D015473 | Arsenic De   | 23.21 | 158 |
| ABCB9   | 23457  | Leukemia, MESH:D015470 | Dexameth     | 23.2  | 16  |
| ALDH1A2 | 8854   | Leukemia, MESH:D015470 | Bezafibrat   | 23.2  | 19  |
| AMD1    | 262    | Leukemia, MESH:D015473 | Arsenic Ar   | 23.2  | 268 |
| CPZ     | 8532   | Leukemia, MESH:D015470 | Calcitriol C | 23.2  | 78  |
| ERP27   | 121506 | Leukemia, MESH:D015470 | Air Polluta  | 23.2  | 11  |
| FBXO3   | 26273  | Leukemia, MESH:D015470 | Benzene C    | 23.2  | 29  |
| GALNT16 | 57452  | Leukemia, MESH:D015470 | Dexameth     | 23.2  | 15  |
| IL27RA  | 9466   | Leukemia, MESH:D015470 | Arsenic Tr   | 23.2  | 27  |
| LARP6   | 55323  | Leukemia, MESH:D015470 | Decitabine   | 23.2  | 26  |
| LPCAT2  | 54947  | Leukemia, MESH:D015470 | Dexameth     | 23.2  | 15  |
| MFAP3L  | 9848   | Leukemia, MESH:D015470 | Air Polluta  | 23.2  | 13  |
| MPP7    | 143098 | Leukemia, MESH:D015470 | Calcitriol C | 23.2  | 14  |
| ND4     | 4538   | Leukemia, MESH:D015470 | Arsenic Tr   | 23.2  | 29  |
| NIFK    | 84365  | Leukemia, MESH:D015470 | Arsenic Tr   | 23.2  | 22  |
| NOD2    | 64127  | Leukemia, MESH:D015470 | Calcitriol C | 23.2  | 11  |
| NPTN    | 27020  | Leukemia, MESH:D015470 | Arsenic Tr   | 23.2  | 22  |
| PHACTR2 | 9749   | Leukemia, MESH:D015470 | Azacididine  | 23.2  | 82  |
| PLLP    | 51090  | Leukemia, MESH:D015470 | Arsenic Tr   | 23.2  | 87  |
| PTPN3   | 5774   | Leukemia, MESH:D015473 | arsenite Ci  | 23.2  | 160 |
| TANC1   | 85461  | Leukemia, MESH:D015470 | Arsenic Tr   | 23.2  | 21  |
| TCP11L2 | 255394 | Leukemia, MESH:D015473 | arsenite D   | 23.2  | 157 |
| TMEM45A | 55076  | Leukemia, MESH:D015470 | Cytarabine   | 23.2  | 82  |
| TRIM13  | 10206  | Leukemia, MESH:D015470 | Calcitriol C | 23.2  | 15  |
| TRIM27  | 5987   | Leukemia, MESH:D015470 | Air Polluta  | 23.2  | 22  |
| ZBTB21  | 49854  | Leukemia, MESH:D015470 | Air Polluta  | 23.2  | 21  |
| ABCC9   | 10060  | Leukemia, MESH:D015470 | Dexameth     | 23.19 | 17  |
| CEP55   | 55165  | Leukemia, MESH:D015470 | Arsenic Tr   | 23.19 | 22  |
| DTYMK   | 1841   | Leukemia, MESH:D015473 | arsenite Ci  | 23.19 | 158 |
| GABARAP | 23766  | Leukemia, MESH:D015470 | Azacididine  | 23.19 | 83  |
| IFITM2  | 10581  | Leukemia, MESH:D015470 | Benzene C    | 23.19 | 34  |
| KDM3A   | 55818  | Leukemia, MESH:D015470 | Arsenic Tr   | 23.19 | 22  |
| LRP5    | 4041   | Leukemia, MESH:D015470 | Androgen     | 23.19 | 17  |
| RPL17   | 6139   | Leukemia, MESH:D015470 | Arsenic Tr   | 23.19 | 26  |

|         |        |                        |              |       |     |
|---------|--------|------------------------|--------------|-------|-----|
| SCN5A   | 6331   | Leukemia, MESH:D015470 | Crizotinib   | 23.19 | 55  |
| DES     | 1674   | Leukemia, MESH:D015473 | Arsenic De   | 23.18 | 163 |
| IL23A   | 51561  | Leukemia, MESH:D015473 | Arsenic Ar   | 23.18 | 163 |
| PPARD   | 5467   | Leukemia, MESH:D015473 | arsenite Ci  | 23.18 | 162 |
| TNNT2   | 7139   | Leukemia, MESH:D015473 | Arsenic Ar   | 23.18 | 271 |
| ATF4    | 468    | Leukemia, MESH:D015473 | 2-(2-chlor   | 23.17 | 264 |
| IL1R1   | 3554   | Leukemia, MESH:D015473 | Arsenic Ca   | 23.17 | 160 |
| TMSB15A | 11013  | Leukemia, MESH:D015473 | Calcitriol E | 23.15 | 156 |
| ACACB   | 32     | Leukemia, MESH:D015470 | Bezafibrat   | 23.14 | 18  |
| CHMP1A  | 5119   | Leukemia, MESH:D015470 | Arsenic Tr   | 23.14 | 28  |
| EMC8    | 10328  | Leukemia, MESH:D015470 | Decitabine   | 23.14 | 21  |
| FABP4   | 2167   | Leukemia, MESH:D015473 | Arsenic ars  | 23.14 | 161 |
| MIR10B  | 406903 | Leukemia, MESH:D015470 | Air Polluta  | 23.14 | 19  |
| NDUFAF3 | 25915  | Leukemia, MESH:D015470 | Alitretinoin | 23.14 | 14  |
| PHACTR3 | 116154 | Leukemia, MESH:D015470 | Dexameth     | 23.14 | 11  |
| AASDH   | 132949 | Leukemia, MESH:D015470 | Dronabinc    | 23.13 | 10  |
| ADIRF   | 10974  | Leukemia, MESH:D015470 | Dexameth     | 23.13 | 16  |
| BTN3A2  | 11118  | Leukemia, MESH:D015470 | Arsenic Tr   | 23.13 | 19  |
| FAM216A | 29902  | Leukemia, MESH:D015470 | Calcitriol E | 23.13 | 9   |
| GPR135  | 64582  | Leukemia, MESH:D015470 | Dexameth     | 23.13 | 10  |
| HCP5    | 10866  | Leukemia, MESH:D015470 | Decitabine   | 23.13 | 21  |
| HES4    | 57801  | Leukemia, MESH:D015470 | Decitabine   | 23.13 | 19  |
| MEAF6   | 64769  | Leukemia, MESH:D015470 | Dexameth     | 23.13 | 15  |
| NUP43   | 348995 | Leukemia, MESH:D015470 | Air Polluta  | 23.13 | 14  |
| PRDM4   | 11108  | Leukemia, MESH:D015470 | Dexameth     | 23.13 | 13  |
| SEMA6C  | 10500  | Leukemia, MESH:D015470 | Azacitidine  | 23.13 | 15  |
| ZFP42   | 132625 | Leukemia, MESH:D015470 | Arsenic Tr   | 23.13 | 14  |
| COMTD1  | 118881 | Leukemia, MESH:D015473 | Arsenic De   | 23.12 | 159 |
| CYP2S1  | 29785  | Leukemia, MESH:D015473 | Calcitriol E | 23.12 | 154 |
| ESM1    | 11082  | Leukemia, MESH:D015473 | Arsenic Ch   | 23.12 | 157 |
| KNTC1   | 9735   | Leukemia, MESH:D015473 | Arsenic ars  | 23.12 | 160 |
| LAMA2   | 3908   | Leukemia, MESH:D015473 | arsenite Ci  | 23.12 | 157 |
| PRIM2   | 5558   | Leukemia, MESH:D015473 | Buthionine   | 23.12 | 156 |
| HILPDA  | 29923  | Leukemia, MESH:D015470 | Arsenic Tr   | 23.1  | 27  |
| PTN     | 5764   | Leukemia, MESH:D015470 | Calcitriol E | 23.1  | 16  |
| RBPMS   | 11030  | Leukemia, MESH:D015470 | Arsenic Tr   | 23.1  | 21  |
| RPLP0   | 6175   | Leukemia, MESH:D015470 | Arsenic Tr   | 23.1  | 24  |
| SP1     | 6667   | Leukemia, MESH:D015473 | Arsenic Ar   | 23.1  | 265 |
| TBXAS1  | 6916   | Leukemia, MESH:D015470 | Benzene C    | 23.1  | 26  |
| CUL1    | 8454   | Leukemia, MESH:D015470 | Arsenic Tr   | 23.09 | 21  |
| GOLM1   | 51280  | Leukemia, MESH:D015470 | Calcitriol E | 23.09 | 11  |
| HLA-DQB | 3119   | Leukemia, MESH:D015470 | Air Polluta  | 23.09 | 15  |
| IFI16   | 3428   | Leukemia, MESH:D015470 | Air Polluta  | 23.09 | 20  |
| KCNS3   | 3790   | Leukemia, MESH:D015470 | Arsenic Tr   | 23.09 | 16  |
| NADK2   | 133686 | Leukemia, MESH:D015470 | Bortezomi    | 23.09 | 17  |
| NUP155  | 9631   | Leukemia, MESH:D015470 | Calcitriol E | 23.09 | 17  |
| SALL4   | 57167  | Leukemia, MESH:D015470 | Azacitidine  | 23.09 | 13  |
| SMS     | 6611   | Leukemia, MESH:D015470 | Arsenic Tr   | 23.09 | 19  |
| STAT5   | 1E+08  | Leukemia, MESH:D015470 | Arsenic Tr   | 23.09 | 13  |
| TCF7L1  | 83439  | Leukemia, MESH:D015470 | Arsenic Tr   | 23.09 | 19  |
| TDG     | 6996   | Leukemia, MESH:D015470 | Bezafibrat   | 23.09 | 15  |
| UBE2J1  | 51465  | Leukemia, MESH:D015470 | Dexameth     | 23.09 | 13  |
| SLC27A2 | 11001  | Leukemia, MESH:D015473 | Arsenic Tr   | 23.08 | 262 |
| MAFG    | 4097   | Leukemia, MESH:D015470 | Benzene B    | 23.07 | 32  |
| NFATC1  | 4772   | Leukemia, MESH:D015470 | Azacitidine  | 23.07 | 41  |
| DCBLD2  | 131566 | Leukemia, MESH:D015473 | Arsenic Ar   | 23.05 | 264 |
| GCH2    | 64263  | Leukemia, MESH:D015470 | Dexameth     | 23.05 | 9   |
| NCAPG2  | 54892  | Leukemia, MESH:D015473 | arsenite Ci  | 23.05 | 157 |

|         |        |                        |              |       |     |
|---------|--------|------------------------|--------------|-------|-----|
| TRIM24  | 8805   | Leukemia, MESH:D015473 | Arsenic Ar   | 23.05 | 264 |
| AQP1    | 358    | Leukemia, MESH:D004915 | Cytarabine   | 23.04 | 4   |
| MCPT1   | 17224  | Leukemia, MESH:D015473 | Calcitriol C | 23.04 | 7   |
| MSI1    | 4440   | Leukemia, MESH:D015473 | Arsenic Tr   | 23.04 | 264 |
| ZNF780B | 163131 | Leukemia, MESH:D015470 | Air Polluta  | 23.04 | 13  |
| AIFM1   | 9131   | Leukemia, MESH:D007948 | 2-(2-amin    | 23.03 | 3   |
| SNRPB2  | 6629   | Leukemia, MESH:D015473 | arsenite D   | 23.03 | 157 |
| SRC     | 6714   | Leukemia, MESH:D015473 | Arsenic Ar   | 23.03 | 160 |
| TMBIM4  | 51643  | Leukemia, MESH:D015473 | Arsenic Tr   | 23.03 | 262 |
| ANKRD12 | 23253  | Leukemia, MESH:D015470 | Arsenic Tr   | 23.02 | 17  |
| ANKRD37 | 353322 | Leukemia, MESH:D015470 | Calcitriol C | 23.02 | 14  |
| GALE    | 2582   | Leukemia, MESH:D015470 | Arsenic Tr   | 23.02 | 19  |
| NR1H2   | 7376   | Leukemia, MESH:D015470 | Alitretinoi  | 23.02 | 25  |
| TRAP1   | 10131  | Leukemia, MESH:D015470 | Arsenic Tr   | 23.02 | 22  |
| VAV3    | 10451  | Leukemia, MESH:D015470 | Arsenic Tr   | 23.02 | 20  |
| CA2     | 760    | Leukemia, MESH:D015470 | Alitretinoi  | 23.01 | 16  |
| PYCARD  | 29108  | Leukemia, MESH:D015470 | Allopurinc   | 23.01 | 27  |
| SLC7A1  | 6541   | Leukemia, MESH:D015470 | Androgen     | 23.01 | 22  |
| UBC     | 7316   | Leukemia, MESH:D015470 | Arsenic Tr   | 23.01 | 26  |
| RUNX2   | 860    | Leukemia, MESH:D007948 | 2-(2-amin    | 23    | 3   |
| COL18A1 | 80781  | Leukemia, MESH:D015473 | Arsenic ca   | 22.99 | 161 |
| BAG2    | 9532   | Leukemia, MESH:D015473 | arsenite C   | 22.98 | 158 |
| HSPA1A  | 3303   | Leukemia, MESH:D015473 | Antimony     | 22.98 | 267 |
| PBX1    | 5087   | Leukemia, MESH:D015473 | Antimony     | 22.98 | 157 |
| PTGIS   | 5740   | Leukemia, MESH:D015473 | Calcitriol C | 22.98 | 154 |
| SUMO1   | 7341   | Leukemia, MESH:D015473 | Antimony     | 22.98 | 261 |
| TPM3    | 7170   | Leukemia, MESH:D015473 | Arsenic Ar   | 22.98 | 266 |
| ARSG    | 22901  | Leukemia, MESH:D015470 | Dexameth     | 22.97 | 15  |
| CD3G    | 917    | Leukemia, MESH:D015470 | Benzene C    | 22.97 | 24  |
| CLDN9   | 9080   | Leukemia, MESH:D015470 | Arsenic Tr   | 22.97 | 18  |
| CLSTN2  | 64084  | Leukemia, MESH:D015470 | Dexameth     | 22.97 | 15  |
| CSPP1   | 79848  | Leukemia, MESH:D015470 | Arsenic Tr   | 22.97 | 20  |
| DDB1    | 1642   | Leukemia, MESH:D015470 | Arsenic Tr   | 22.97 | 20  |
| EMG1    | 10436  | Leukemia, MESH:D015470 | Decitabine   | 22.97 | 17  |
| EPHB6   | 2051   | Leukemia, MESH:D015470 | Calcitriol C | 22.97 | 23  |
| ERBB4   | 2066   | Leukemia, MESH:D015473 | Arsenic Ar   | 22.97 | 264 |
| GSTCD   | 79807  | Leukemia, MESH:D015470 | Bortezomi    | 22.97 | 81  |
| HCFC1   | 3054   | Leukemia, MESH:D015470 | Arsenic Tr   | 22.97 | 22  |
| ITPKB   | 3707   | Leukemia, MESH:D015470 | Doxorubic    | 22.97 | 17  |
| MEGF6   | 1953   | Leukemia, MESH:D015470 | Arsenic Tr   | 22.97 | 16  |
| MLPH    | 79083  | Leukemia, MESH:D015470 | Dexameth     | 22.97 | 15  |
| NBR1    | 4077   | Leukemia, MESH:D015470 | Air Polluta  | 22.97 | 18  |
| OLAH    | 55301  | Leukemia, MESH:D015470 | Calcitriol C | 22.97 | 13  |
| PLEKHO2 | 80301  | Leukemia, MESH:D015470 | Benzene C    | 22.97 | 24  |
| RGMA    | 56963  | Leukemia, MESH:D015470 | Dexameth     | 22.97 | 15  |
| RHO     | 6010   | Leukemia, MESH:D015470 | Alitretinoi  | 22.97 | 13  |
| SCO2    | 9997   | Leukemia, MESH:D015470 | Arsenic Tr   | 22.97 | 18  |
| TMEM185 | 79134  | Leukemia, MESH:D015470 | Doxorubic    | 22.97 | 22  |
| UBAP2L  | 9898   | Leukemia, MESH:D015470 | Arsenic Tr   | 22.97 | 21  |
| UQCRCQ  | 27089  | Leukemia, MESH:D015470 | Arsenic Tr   | 22.97 | 21  |
| USP25   | 29761  | Leukemia, MESH:D015470 | Chloroqui    | 22.97 | 13  |
| VPS25   | 84313  | Leukemia, MESH:D015470 | Dexameth     | 22.97 | 12  |
| COMMD6  | 170622 | Leukemia, MESH:D015470 | Dexameth     | 22.96 | 14  |
| DCAF4   | 26094  | Leukemia, MESH:D015470 | Doxorubic    | 22.96 | 23  |
| INTS3   | 65123  | Leukemia, MESH:D015470 | Dexameth     | 22.96 | 14  |
| LMF2    | 91289  | Leukemia, MESH:D015470 | Gasoline C   | 22.96 | 10  |
| LNPK    | 80856  | Leukemia, MESH:D015470 | Dexameth     | 22.96 | 11  |
| PLXNA1  | 5361   | Leukemia, MESH:D015470 | Dexameth     | 22.96 | 14  |

|          |        |                        |              |       |     |
|----------|--------|------------------------|--------------|-------|-----|
| TMEM199  | 147007 | Leukemia, MESH:D015470 | Dexameth     | 22.96 | 14  |
| TXN      | 7295   | Leukemia, MESH:D015473 | Antimony     | 22.96 | 266 |
| USP42    | 84132  | Leukemia, MESH:D015470 | Dexameth     | 22.96 | 13  |
| CRYL1    | 51084  | Leukemia, MESH:D015470 | Benzene C    | 22.94 | 27  |
| CTNND1   | 1500   | Leukemia, MESH:D015470 | Arsenic Tr   | 22.94 | 28  |
| ENDOG    | 2021   | Leukemia, MESH:D015470 | Dexameth     | 22.94 | 18  |
| FOXM1    | 2305   | Leukemia, MESH:D015473 | Arsenic Tr   | 22.94 | 264 |
| LRP1     | 4035   | Leukemia, MESH:D015473 | Arsenic Ar   | 22.94 | 161 |
| PPRC1    | 23082  | Leukemia, MESH:D015470 | Arsenic Tr   | 22.94 | 18  |
| PSMD12   | 5718   | Leukemia, MESH:D015470 | Arsenic Tr   | 22.94 | 41  |
| E2F1     | 1869   | Leukemia, MESH:D015473 | alvocidib /  | 22.93 | 266 |
| ALDH3B2  | 222    | Leukemia, MESH:D015473 | Antimony     | 22.92 | 14  |
| CYP11A1  | 1583   | Leukemia, MESH:D015473 | Arsenic Ar   | 22.92 | 265 |
| HMGB1    | 3146   | Leukemia, MESH:D007948 | Arsenic Tr   | 22.92 | 4   |
| ANK2     | 287    | Leukemia, MESH:D015473 | Arsenic ar:  | 22.91 | 163 |
| CEP135   | 9662   | Leukemia, MESH:D015473 | arsenite D   | 22.91 | 159 |
| CYP3A23- | 25642  | Leukemia, MESH:D015470 | Benzene C    | 22.91 | 30  |
| ERCC8    | 1161   | Leukemia, MESH:D015473 | Arsenic Tr   | 22.91 | 264 |
| H1-5     | 3009   | Leukemia, MESH:D015473 | Calcitriol C | 22.91 | 153 |
| PRR16    | 51334  | Leukemia, MESH:D015473 | Arsenic Ar   | 22.91 | 264 |
| ALDH4A1  | 8659   | Leukemia, MESH:D015473 | Arsenic Ar   | 22.9  | 265 |
| CSRP3    | 8048   | Leukemia, MESH:D015473 | Arsenic Tr   | 22.9  | 261 |
| FOXRED2  | 80020  | Leukemia, MESH:D015473 | Arsenic Tr   | 22.9  | 261 |
| PIK3CB   | 5291   | Leukemia, MESH:D015473 | Arsenic Tr   | 22.9  | 267 |
| SLC2A1   | 6513   | Leukemia, MESH:D015473 | Arsenic Ar   | 22.9  | 270 |
| TOMM34   | 10953  | Leukemia, MESH:D015473 | Arsenic Ar   | 22.9  | 264 |
| PTP4A1   | 7803   | Leukemia, MESH:D015470 | Calcitriol C | 22.88 | 17  |
| S100B    | 6285   | Leukemia, MESH:D015470 | Arsenic Tr   | 22.88 | 22  |
| SLC6A6   | 6533   | Leukemia, MESH:D015470 | Dasatinib    | 22.88 | 18  |
| BOK      | 666    | Leukemia, MESH:D015470 | Azacitidine  | 22.86 | 18  |
| CD302    | 9936   | Leukemia, MESH:D015470 | Dasatinib    | 22.86 | 16  |
| CKLF     | 51192  | Leukemia, MESH:D015470 | Calcitriol C | 22.86 | 19  |
| CMTM3    | 123920 | Leukemia, MESH:D015470 | Calcitriol C | 22.86 | 10  |
| COL11A2  | 1302   | Leukemia, MESH:D015470 | Dexameth     | 22.86 | 15  |
| CYB561   | 1534   | Leukemia, MESH:D015470 | Dexameth     | 22.86 | 18  |
| DUSP8    | 1850   | Leukemia, MESH:D015470 | Air Polluta  | 22.86 | 23  |
| FARSA    | 2193   | Leukemia, MESH:D015470 | Bortezomi    | 22.86 | 15  |
| HBA-A1   | 15122  | Leukemia, MESH:D015470 | Benzene C    | 22.86 | 31  |
| HMOX2    | 3163   | Leukemia, MESH:D015470 | Arsenic Tr   | 22.86 | 16  |
| MYBPC3   | 4607   | Leukemia, MESH:D015470 | Dexameth     | 22.86 | 15  |
| NCF1     | 653361 | Leukemia, MESH:D015473 | Arsenic Ar   | 22.86 | 272 |
| OLA1     | 29789  | Leukemia, MESH:D015470 | Decitabine   | 22.86 | 21  |
| OPTN     | 10133  | Leukemia, MESH:D015470 | Arsenic Tr   | 22.86 | 26  |
| PDXK     | 8566   | Leukemia, MESH:D015470 | Air Polluta  | 22.86 | 29  |
| PLA2G4C  | 8605   | Leukemia, MESH:D015470 | Dexameth     | 22.86 | 19  |
| PLIN5    | 440503 | Leukemia, MESH:D015470 | Dexameth     | 22.86 | 11  |
| PNRC1    | 10957  | Leukemia, MESH:D015470 | Arsenic Tr   | 22.86 | 22  |
| RASSF4   | 83937  | Leukemia, MESH:D015470 | Dexameth     | 22.86 | 16  |
| SCLY     | 51540  | Leukemia, MESH:D015470 | Arsenic Tr   | 22.86 | 26  |
| SDHC     | 6391   | Leukemia, MESH:D015470 | Arsenic Tr   | 22.86 | 21  |
| SLC15A3  | 51296  | Leukemia, MESH:D015470 | Benzene C    | 22.86 | 30  |
| SPOCK1   | 6695   | Leukemia, MESH:D015470 | Dexameth     | 22.86 | 15  |
| SRGAP3   | 9901   | Leukemia, MESH:D015470 | Cytarabine   | 22.86 | 79  |
| TBC1D8   | 11138  | Leukemia, MESH:D015470 | Calcitriol E | 22.86 | 26  |
| TRAF2    | 7186   | Leukemia, MESH:D015470 | Arsenic Tr   | 22.86 | 47  |
| TTC28    | 23331  | Leukemia, MESH:D015470 | Arsenic Tr   | 22.86 | 22  |
| CD80     | 941    | Leukemia, MESH:D015473 | Arsenic Ar   | 22.84 | 266 |
| CLDN4    | 1364   | Leukemia, MESH:D015473 | Arsenic Ar   | 22.84 | 266 |

|          |        |                            |              |       |     |
|----------|--------|----------------------------|--------------|-------|-----|
| MAP3K5   | 4217   | Leukemia, MESH:D004915     | Daunorub     | 22.84 | 3   |
| SLC20A1  | 6574   | Leukemia, MESH:D015473     | Arsenic Tr   | 22.84 | 261 |
| KRT15    | 3866   | Leukemia, MESH:D015473     | Arsenic Ar   | 22.83 | 160 |
| RAD51C   | 5889   | Leukemia, MESH:D015473     | Arsenic Tr   | 22.83 | 264 |
| ZMYND8   | 23613  | Leukemia, MESH:D015473     | Arsenic Tr   | 22.83 | 263 |
| HSPA1B   | 3304   | Leukemia, MESH:D015473     | alpha-Toc    | 22.82 | 163 |
| NPPB     | 4879   | Leukemia, MESH:D015473     | Calcitriol C | 22.82 | 164 |
| SRRT     | 51593  | Leukemia, MESH:D007948     | Arsenic Tr   | 22.82 | 3   |
| ANKDD1A  | 348094 | Leukemia, MESH:D015470     | Benzene C    | 22.8  | 32  |
| ANKRD13  | 124930 | Leukemia, MESH:D015470     | Dexameth     | 22.8  | 14  |
| AZIN2    | 113451 | Leukemia, MESH:D015470     | Decitabine   | 22.8  | 20  |
| CCDC93   | 54520  | Leukemia, MESH:D015470     | Calcitriol C | 22.8  | 14  |
| CSTF2T   | 23283  | Leukemia, MESH:D015470     | Doxorubic    | 22.8  | 17  |
| ELFN1    | 392617 | Leukemia, MESH:D015470     | Dexameth     | 22.8  | 16  |
| FANCE    | 2178   | Leukemia, MESH:D015470     | Calcitriol C | 22.8  | 8   |
| GPATCH8  | 23131  | Leukemia, MESH:D015470     | Cyclophos    | 22.8  | 14  |
| JKAMP    | 51528  | Leukemia, MESH:D015470     | Arsenic Tr   | 22.8  | 19  |
| MAST3    | 23031  | Leukemia, MESH:D015470     | Dexameth     | 22.8  | 14  |
| MICU3    | 286097 | Leukemia, MESH:D015470     | Arsenic Tr   | 22.8  | 20  |
| MTHFD2   | 10797  | Leukemia, MESH:D015473     | Arsenic Tr   | 22.8  | 263 |
| NECAP1   | 25977  | Leukemia, MESH:D015470     | Dexameth     | 22.8  | 9   |
| NREP     | 9315   | Leukemia, MESH:D015473     | Arsenic Ar   | 22.8  | 263 |
| PHB      | 18673  | Leukemia, MESH:D015470     | Busulfan C   | 22.8  | 10  |
| PM20D2   | 135293 | Leukemia, MESH:D015470     | Bortezomi    | 22.8  | 18  |
| RFESD    | 317671 | Leukemia, MESH:D015470     | Decitabine   | 22.8  | 15  |
| RNF5     | 6048   | Leukemia, MESH:D015470     | Alitretnoi   | 22.8  | 14  |
| SMCR8    | 140775 | Leukemia, MESH:D015470     | Dexameth     | 22.8  | 16  |
| SNHG7    | 84973  | Leukemia, MESH:D015470     | Dexameth     | 22.8  | 13  |
| ZNF165   | 7718   | Leukemia, MESH:D015470     | Bortezomi    | 22.8  | 10  |
| PRDM8    | 56978  | Leukemia, MESH:D015473     | Arsenic Tr   | 22.79 | 265 |
| ROBO3    | 64221  | Leukemia, MESH:D015473     | Arsenic Cy   | 22.79 | 158 |
| SERPINE2 | 5270   | Leukemia, MESH:D015473     | arsenite C   | 22.79 | 156 |
| CAD      | 790    | Leukemia, MESH:D015470     | Arsenic Tr   | 22.78 | 18  |
| CARM1    | 10498  | Leukemia, MESH:D015473     | Arsenic Tr   | 22.78 | 262 |
| CLDN2    | 9075   | Leukemia, MESH:D015470     | Chloroqui    | 22.78 | 23  |
| EEF1A2   | 1917   | Leukemia, MESH:D015470     | Arsenic Tr   | 22.78 | 28  |
| IRF3     | 3661   | Leukemia, MESH:D015470     | Arsenic Tr   | 22.78 | 18  |
| KL       | 9365   | Leukemia, MESH:D015470     | Arsenic Tr   | 22.78 | 24  |
| MANF     | 7873   | Leukemia, MESH:D015470     | Arsenic Tr   | 22.78 | 23  |
| NNMT     | 4837   | Leukemia, MESH:D015470     | Dasatinib    | 22.78 | 17  |
| PLN      | 5350   | Leukemia, MESH:D015470     | Allopurinc   | 22.78 | 19  |
| SLC26A3  | 1811   | Leukemia, MESH:D015473     | Calcitriol C | 22.78 | 154 |
| SPSB1    | 80176  | Leukemia, MESH:D015470     | Dexameth     | 22.78 | 16  |
| NPIP3    | 23117  | Leukemia, MESH:D015470     | Dexameth     | 22.77 | 12  |
| PLAU     | 5328   | Leukemia, MESH:D007948     | 2-(2-amin    | 22.77 | 3   |
| CAMK2N1  | 55450  | Leukemia, MESH:D015473     | arsenite C   | 22.76 | 161 |
| LRP8     | 7804   | Leukemia, MESH:D015473     | Arsenic De   | 22.76 | 159 |
| MMP12    | 4321   | Leukemia, MESH:D015470     | Air Polluta  | 22.76 | 25  |
| PLP1     | 5354   | Leukemia, MESH:D015473     | Arsenic Ar   | 22.76 | 266 |
| POTEF    | 728378 | Leukemia, MESH:D015470     | Dexameth     | 22.76 | 14  |
| SDCBP    | 6386   | Leukemia, MESH:D015473     | Arsenic Ar   | 22.76 | 265 |
| ZNF317   | 57693  | Leukemia, MESH:D015470     | Dexameth     | 22.76 | 14  |
| EHD3     | 30845  | Leukemia, MESH:D01marker/m | Decitabine   | 22.75 | 24  |
| ABCA2    | 20     | Leukemia, MESH:D015470     | Bortezomi    | 22.75 | 18  |
| ASIC1    | 41     | Leukemia, MESH:D015470     | Arsenic Tr   | 22.75 | 15  |
| CDC42EP4 | 23580  | Leukemia, MESH:D015470     | Decitabine   | 22.75 | 21  |
| EFEMP2   | 30008  | Leukemia, MESH:D015470     | Calcitriol C | 22.75 | 88  |
| ITM2A    | 9452   | Leukemia, MESH:D015470     | Arsenic Tr   | 22.75 | 22  |



|          |        |                        |              |       |     |
|----------|--------|------------------------|--------------|-------|-----|
| LEF1     | 51176  | Leukemia, MESH:D015473 | Arseniclar:  | 22.75 | 161 |
| MASTL    | 84930  | Leukemia, MESH:D015470 | Dasatinib    | 22.75 | 16  |
| NDUFA3   | 4696   | Leukemia, MESH:D015470 | Dexameth     | 22.75 | 16  |
| NPTX2    | 4885   | Leukemia, MESH:D015470 | Arsenic Tr   | 22.75 | 22  |
| NSG1     | 27065  | Leukemia, MESH:D015470 | Benzene C    | 22.75 | 31  |
| PARM1    | 25849  | Leukemia, MESH:D015470 | Cytarabine   | 22.75 | 83  |
| PBX3     | 5090   | Leukemia, MESH:D015470 | Bortezomi    | 22.75 | 16  |
| PPP1R2   | 5504   | Leukemia, MESH:D015470 | Dexameth     | 22.75 | 23  |
| SLC16A12 | 387700 | Leukemia, MESH:D015470 | Dexameth     | 22.75 | 15  |
| USP10    | 9100   | Leukemia, MESH:D015470 | Dexameth     | 22.75 | 13  |
| GLUL     | 2752   | Leukemia, MESH:D015473 | arsenic dis  | 22.72 | 265 |
| CSF2     | 1437   | Leukemia, MESH:D015473 | Arsenic Ar   | 22.71 | 266 |
| CTF1     | 1489   | Leukemia, MESH:D007948 | Arsenic Tr   | 22.71 | 3   |
| DYNC1H1  | 1778   | Leukemia, MESH:D015470 | Arsenic Tr   | 22.7  | 36  |
| MSR1     | 4481   | Leukemia, MESH:D015470 | Arsenic Tr   | 22.7  | 25  |
| PGM1     | 5236   | Leukemia, MESH:D015470 | Arsenic Tr   | 22.7  | 24  |
| PRMT1    | 3276   | Leukemia, MESH:D015470 | Arsenic Tr   | 22.7  | 22  |
| PSMA1    | 5682   | Leukemia, MESH:D015470 | Arsenic Tr   | 22.7  | 21  |
| SH3KBP1  | 30011  | Leukemia, MESH:D015470 | Calcitriol C | 22.7  | 15  |
| SLC19A2  | 10560  | Leukemia, MESH:D015470 | Dexameth     | 22.7  | 21  |
| SMC2     | 10592  | Leukemia, MESH:D015470 | Benzene C    | 22.7  | 32  |
| ATP6V1A  | 523    | Leukemia, MESH:D015473 | Arsenic Tr   | 22.69 | 265 |
| CEBPA    | 1050   | Leukemia, MESH:D007948 | 2-(2-amin    | 22.69 | 3   |
| MGMT     | 4255   | Leukemia, MESH:D015473 | Arseniclar:  | 22.69 | 18  |
| SYNM     | 23336  | Leukemia, MESH:D015473 | Arseniclar:  | 22.69 | 158 |
| TNFRSF10 | 8795   | Leukemia, MESH:D007948 | 2-(2-amin    | 22.69 | 4   |
| RBM34    | 23029  | Leukemia, MESH:D015473 | Cytarabine   | 22.67 | 158 |
| ST6GALN4 | 81849  | Leukemia, MESH:D015473 | Arseniclar:  | 22.67 | 157 |
| TNS4     | 84951  | Leukemia, MESH:D015473 | Arsenic Tr   | 22.67 | 263 |
| FGF10    | 2255   | Leukemia, MESH:D007948 | 2-(2-amin    | 22.66 | 3   |
| MIF      | 4282   | Leukemia, MESH:D015470 | Arsenic Tr   | 22.66 | 24  |
| P4HB     | 5034   | Leukemia, MESH:D015473 | Arsenic Ar   | 22.66 | 267 |
| PTPN1    | 5770   | Leukemia, MESH:D015473 | Arsenic Tr   | 22.66 | 156 |
| RNF150   | 57484  | Leukemia, MESH:D015473 | arsenite D   | 22.66 | 155 |
| CLPX     | 10845  | Leukemia, MESH:D015470 | Air Polluta  | 22.65 | 17  |
| FLT4     | 2324   | Leukemia, MESH:D015470 | Antifungal   | 22.65 | 25  |
| RGS17    | 26575  | Leukemia, MESH:D015470 | Calcitriol C | 22.65 | 13  |
| STIL     | 6491   | Leukemia, MESH:D015470 | Calcitriol C | 22.65 | 14  |
| AP1G1    | 164    | Leukemia, MESH:D015470 | Calcitriol C | 22.64 | 12  |
| APCDD1   | 147495 | Leukemia, MESH:D015470 | Calcitriol C | 22.64 | 15  |
| ATG7     | 10533  | Leukemia, MESH:D015470 | Air Polluta  | 22.64 | 23  |
| AUTS2    | 26053  | Leukemia, MESH:D015470 | Arsenic Tr   | 22.64 | 35  |
| CHTF18   | 63922  | Leukemia, MESH:D015470 | Arsenic Tr   | 22.64 | 19  |
| COX7A2   | 1347   | Leukemia, MESH:D015470 | Cyclophos    | 22.64 | 16  |
| DNASE1L1 | 1774   | Leukemia, MESH:D015470 | Arsenic Tr   | 22.64 | 19  |
| ELP5     | 23587  | Leukemia, MESH:D015470 | Arsenic Tr   | 22.64 | 20  |
| FUT11    | 170384 | Leukemia, MESH:D015470 | Arsenic Tr   | 22.64 | 22  |
| GALC     | 2581   | Leukemia, MESH:D015470 | Cyclophos    | 22.64 | 16  |
| GRAMD2E  | 65983  | Leukemia, MESH:D015470 | Arsenic Tr   | 22.64 | 23  |
| HECTD4   | 283450 | Leukemia, MESH:D015470 | Dexameth     | 22.64 | 12  |
| ITGA6    | 3655   | Leukemia, MESH:D015470 | Arsenic Tr   | 22.64 | 24  |
| ITPRIP   | 85450  | Leukemia, MESH:D015470 | Dexameth     | 22.64 | 15  |
| LHFPL6   | 10186  | Leukemia, MESH:D015470 | Arsenic Tr   | 22.64 | 87  |
| MAP3K4   | 4216   | Leukemia, MESH:D015470 | Doxorubic    | 22.64 | 17  |
| MIR22HG  | 84981  | Leukemia, MESH:D015470 | Benzene C    | 22.64 | 92  |
| RFC2     | 5982   | Leukemia, MESH:D015470 | Arsenic Tr   | 22.64 | 18  |
| RNF167   | 26001  | Leukemia, MESH:D015470 | Arsenic Tr   | 22.64 | 15  |
| RNF31    | 55072  | Leukemia, MESH:D015470 | Benzene C    | 22.64 | 27  |

|          |        |                        |               |       |     |
|----------|--------|------------------------|---------------|-------|-----|
| SLC39A13 | 91252  | Leukemia, MESH:D015470 | Arsenic Tr    | 22.64 | 19  |
| SNRPA    | 6626   | Leukemia, MESH:D015470 | Arsenic Tr    | 22.64 | 22  |
| SNTB1    | 6641   | Leukemia, MESH:D015470 | Calcitriol C  | 22.64 | 15  |
| STIM2    | 57620  | Leukemia, MESH:D015470 | Bortezomi     | 22.64 | 14  |
| TDP1     | 55775  | Leukemia, MESH:D015470 | Arsenic Tr    | 22.64 | 17  |
| TESK1    | 7016   | Leukemia, MESH:D015470 | Benzene C     | 22.64 | 28  |
| CDKN2D   | 1032   | Leukemia, MESH:D015473 | Arsenic Ar    | 22.63 | 265 |
| GLT8D2   | 83468  | Leukemia, MESH:D015470 | Calcitriol C  | 22.63 | 14  |
| IST1     | 9798   | Leukemia, MESH:D015470 | Dexameth      | 22.63 | 14  |
| MXI1     | 4601   | Leukemia, MESH:D015473 | arsenite Ca   | 22.63 | 156 |
| PITPNM2  | 57605  | Leukemia, MESH:D015470 | Doxorubic     | 22.63 | 16  |
| TIGD2    | 166815 | Leukemia, MESH:D015470 | Arsenic Tr    | 22.63 | 20  |
| ZNF385B  | 151126 | Leukemia, MESH:D015470 | Decitabine    | 22.63 | 17  |
| CCN1     | 3491   | Leukemia, MESH:D015473 | Arsenic Ar    | 22.62 | 264 |
| CCN5     | 8839   | Leukemia, MESH:D015473 | Arsenic Tr    | 22.62 | 157 |
| CYP3A5   | 1577   | Leukemia, MESH:D015473 | 2-(2-chlor    | 22.62 | 16  |
| EPS8     | 2059   | Leukemia, MESH:D015470 | Dexameth      | 22.62 | 17  |
| FAM83D   | 81610  | Leukemia, MESH:D015473 | Arsenic ar:   | 22.62 | 159 |
| PCDH7    | 5099   | Leukemia, MESH:D015473 | arsenite Ci   | 22.62 | 158 |
| PLAGL1   | 5325   | Leukemia, MESH:D015470 | Decitabine    | 22.62 | 28  |
| PTAFR    | 5724   | Leukemia, MESH:D015470 | Dexameth      | 22.62 | 14  |
| PTMA     | 5757   | Leukemia, MESH:D015470 | Arsenic Tr    | 22.62 | 24  |
| SDHB     | 6390   | Leukemia, MESH:D015470 | Arsenic Tr    | 22.62 | 22  |
| SP7      | 121340 | Leukemia, MESH:D015473 | Arsenic Tr    | 22.62 | 261 |
| STK17B   | 9262   | Leukemia, MESH:D015473 | Arsenic Ar    | 22.62 | 263 |
| TENT5C   | 54855  | Leukemia, MESH:D015473 | Arsenic Tr    | 22.62 | 267 |
| ALAD     | 210    | Leukemia, MESH:D015470 | Arsenic Tr    | 22.61 | 49  |
| ERRF1    | 54206  | Leukemia, MESH:D015473 | Arsenic Ar    | 22.61 | 267 |
| F3       | 2152   | Leukemia, MESH:D007948 | 2-(2-amin     | 22.61 | 3   |
| NT5E     | 4907   | Leukemia, MESH:D015473 | Arsenic Ar    | 22.61 | 266 |
| PBK      | 55872  | Leukemia, MESH:D015473 | Calcitriol C  | 22.61 | 155 |
| BIRC5    | 332    | Leukemia, MESH:D004915 | Daunorub      | 22.6  | 4   |
| ERCC1    | 2067   | Leukemia, MESH:D015470 | Benzene C     | 22.58 | 36  |
| RBP1     | 5947   | Leukemia, MESH:D015470 | Alitretinoin  | 22.58 | 28  |
| ABCC5    | 10057  | Leukemia, MESH:D015473 | Arsenic Tr    | 22.57 | 157 |
| KRT23    | 25984  | Leukemia, MESH:D015473 | Calcitriol C  | 22.56 | 154 |
| PLCD1    | 5333   | Leukemia, MESH:D007948 | 2-(2-amin     | 22.56 | 3   |
| PPP1CB   | 5500   | Leukemia, MESH:D015473 | Arsenic Tr    | 22.56 | 266 |
| VCAM1    | 7412   | Leukemia, MESH:D004915 | Cytarabine    | 22.56 | 3   |
| ADAMTS5  | 11096  | Leukemia, MESH:D015473 | Arsenic Ar    | 22.55 | 263 |
| ATP6V1E1 | 529    | Leukemia, MESH:D015473 | Arsenic Ar    | 22.55 | 265 |
| GCSHB    | 436852 | Leukemia, MESH:D015470 | Dexameth      | 22.55 | 6   |
| MRPS17   | 51373  | Leukemia, MESH:D015473 | Arsenic ar:   | 22.55 | 160 |
| RAB37    | 326624 | Leukemia, MESH:D015473 | Arsenic ar:   | 22.55 | 160 |
| VSNL1    | 7447   | Leukemia, MESH:D015473 | Arsenic Ar    | 22.55 | 266 |
| ACER2    | 340485 | Leukemia, MESH:D015470 | Doxorubic     | 22.54 | 23  |
| ADI1     | 55256  | Leukemia, MESH:D015470 | Decitabine    | 22.54 | 21  |
| AQP5     | 362    | Leukemia, MESH:D015470 | Azacitidine   | 22.54 | 10  |
| CCAR1    | 55749  | Leukemia, MESH:D015470 | Bortezomi     | 22.54 | 19  |
| CREB3L2  | 64764  | Leukemia, MESH:D015470 | Arsenic Tr    | 22.54 | 19  |
| DYRK1A   | 1859   | Leukemia, MESH:D015470 | Air Polluta   | 22.54 | 19  |
| EDN1     | 1906   | Leukemia, MESH:D004915 | Cytarabine    | 22.54 | 3   |
| HR       | 55806  | Leukemia, MESH:D015470 | Calcitriol C  | 22.54 | 16  |
| ITGAL    | 3683   | Leukemia, MESH:D015470 | Bortezomi     | 22.54 | 16  |
| LARP1    | 23367  | Leukemia, MESH:D015470 | Dexameth      | 22.54 | 15  |
| PGPEP1   | 54858  | Leukemia, MESH:D015470 | Calcitriol li | 22.54 | 12  |
| PHTF2    | 57157  | Leukemia, MESH:D015470 | Benzoates     | 22.54 | 18  |
| PNPLA3   | 80339  | Leukemia, MESH:D015470 | Dexameth      | 22.54 | 14  |

|          |        |                             |              |       |     |
|----------|--------|-----------------------------|--------------|-------|-----|
| SAMD9    | 54809  | Leukemia, MESH:D015470      | Air Polluta  | 22.54 | 16  |
| TRAFD1   | 10906  | Leukemia, MESH:D015470      | Bortezomi    | 22.54 | 16  |
| VEPH1    | 79674  | Leukemia, MESH:D015470      | Arsenic Tr   | 22.54 | 21  |
| KITLG    | 4254   | Leukemia, MESH:D015473      | Arsenic Tr   | 22.52 | 263 |
| NGFR     | 4804   | Leukemia, MESH:D015473      | caffeic aci  | 22.52 | 156 |
| NR4A3    | 8013   | Leukemia, MESH:D015473      | alpha-Toc    | 22.52 | 158 |
| RND3     | 390    | Leukemia, MESH:D015470      | Arsenic Tr   | 22.52 | 21  |
| SERPINA1 | 5265   | Leukemia, MESH:D015473      | Arsenic Tr   | 22.52 | 265 |
| PLAT     | 5327   | Leukemia, MESH:D007948      | Arsenic Tr   | 22.5  | 4   |
| DHFR2    | 200895 | Leukemia, MESH:D015470      | Dexameth     | 22.49 | 7   |
| FRZB     | 2487   | Leukemia, MESH:D015473      | Arsenic Ca   | 22.49 | 160 |
| FUBP1    | 8880   | Leukemia, MESH:D015473      | Arsenic Ar   | 22.49 | 266 |
| G3BP1    | 10146  | Leukemia, MESH:D015473      | arsenite D   | 22.49 | 158 |
| GPKOW    | 27238  | Leukemia, MESH:D015470      | Arsenic Tr   | 22.49 | 22  |
| MKNK2    | 2872   | Leukemia, MESH:D015473      | Arsenic Ar   | 22.49 | 161 |
| MPL      | 4352   | Leukemia, MESH:D015470      | Arsenic Tr   | 22.49 | 35  |
| ZNF516   | 9658   | Leukemia, MESH:D015470      | Arsenic Tr   | 22.49 | 19  |
| ANKMY2   | 57037  | Leukemia, MESH:D015470      | Calcitriol E | 22.48 | 15  |
| BAHCC1   | 57597  | Leukemia, MESH:D015470      | Dexameth     | 22.48 | 9   |
| CEP19    | 84984  | Leukemia, MESH:D015470      | Dexameth     | 22.48 | 8   |
| CHMP4B   | 128866 | Leukemia, MESH:D015470      | Bezafibrat   | 22.48 | 10  |
| DAAM2    | 23500  | Leukemia, MESH:D015470      | Dexameth     | 22.48 | 9   |
| HNRNPUL  | 221092 | Leukemia, MESH:D015470      | Dexameth     | 22.48 | 13  |
| INTS2    | 57508  | Leukemia, MESH:D015470      | Doxorubic    | 22.48 | 15  |
| MDFI     | 4188   | Leukemia, MESH:D015470      | Arsenic Tr   | 22.48 | 20  |
| MIER3    | 166968 | Leukemia, MESH:D015470      | Doxorubic    | 22.48 | 15  |
| ORA12    | 80228  | Leukemia, MESH:D015470      | Benzene E    | 22.48 | 29  |
| POLR2J2  | 246721 | Leukemia, MESH:D015473      | Antimony     | 22.48 | 155 |
| RTEL1    | 51750  | Leukemia, MESH:D015470      | Cyclophos    | 22.48 | 16  |
| SOX1     | 6656   | Leukemia, MESH:D015470      | Arsenic Tr   | 22.48 | 16  |
| SPRYD7   | 57213  | Leukemia, MESH:D015470      | Arsenic Tr   | 22.48 | 20  |
| TAPBPL   | 55080  | Leukemia, MESH:D015470      | Dexameth     | 22.48 | 14  |
| TFCP2    | 7024   | Leukemia, MESH:D015470      | Dexameth     | 22.48 | 15  |
| TMEM59   | 9528   | Leukemia, MESH:D015470      | Dexameth     | 22.48 | 14  |
| TNFAIP8L | 388121 | Leukemia, MESH:D015470      | Alitretinoi  | 22.48 | 15  |
| TRAPPC1C | 7109   | Leukemia, MESH:D015470      | Dexameth     | 22.48 | 11  |
| VPS72    | 6944   | Leukemia, MESH:D015470      | Air Polluta  | 22.48 | 16  |
| BCLAF1   | 9774   | Leukemia, MESH:D015470      | Dexameth     | 22.47 | 20  |
| BHLHE41  | 79365  | Leukemia, MESH:D015470      | Air Polluta  | 22.47 | 19  |
| COL5A1   | 1289   | Leukemia, MESH:D015473      | Arsenic ar:  | 22.47 | 163 |
| ETV5     | 2119   | Leukemia, MESH:D015470      | Dexameth     | 22.47 | 17  |
| HHEX     | 3087   | Leukemia, MESH:D015470      | Air Polluta  | 22.47 | 27  |
| KLK3     | 354    | Leukemia, MESH:D015473      | Antimony     | 22.47 | 162 |
| LASP1    | 3927   | Leukemia, MESH:D015470      | Arsenic Tr   | 22.47 | 21  |
| MCM4     | 4173   | Leukemia, MESH:D015473      | Arsenic Tr   | 22.47 | 265 |
| MFN2     | 9927   | Leukemia, MESH:D015473      | Arsenic Tr   | 22.47 | 263 |
| NRXN1    | 9378   | Leukemia, MESH:D015470      | Decitabine   | 22.47 | 25  |
| PRLR     | 5618   | Leukemia, MESH:D015473      | arsenite Ci  | 22.47 | 10  |
| PSAP     | 5660   | Leukemia, MESH:D015470      | Bortezomi    | 22.47 | 19  |
| SERPINB9 | 5272   | Leukemia, MESH:D015470      | Alitretinoi  | 22.47 | 81  |
| SLC22A1  | 6580   | Leukemia, MESH:D015470      | Allopurinc   | 22.47 | 20  |
| TUBB2A   | 7280   | Leukemia, MESH:D01marker/mi | Bortezomi    | 22.46 | 26  |
| SLC38A2  | 54407  | Leukemia, MESH:D015470      | Arsenic Tr   | 22.46 | 38  |
| FASLG    | 356    | Leukemia, MESH:D007948      | 2-(2-amin    | 22.45 | 3   |
| MIR708   | 1E+08  | Leukemia, MESH:D015473      | arsenite D   | 22.45 | 157 |
| FCHO2    | 115548 | Leukemia, MESH:D015473      | Arsenic ar:  | 22.44 | 13  |
| H1-3     | 3007   | Leukemia, MESH:D015473      | arsenite G   | 22.44 | 158 |
| PLCXD1   | 55344  | Leukemia, MESH:D015473      | Arsenic Tr   | 22.44 | 261 |

|          |        |                            |              |       |     |
|----------|--------|----------------------------|--------------|-------|-----|
| RAD52    | 5893   | Leukemia, MESH:D015473     | Arsenic Tr   | 22.44 | 158 |
| SLBP     | 7884   | Leukemia, MESH:D015470     | Azacitidine  | 22.44 | 27  |
| SPIN4    | 139886 | Leukemia, MESH:D015473     | Calcitriol[C | 22.44 | 159 |
| CD70     | 970    | Leukemia, MESH:D015470     | Arsenic Tr   | 22.43 | 27  |
| DDX6     | 1656   | Leukemia, MESH:D015470     | Dexameth     | 22.43 | 16  |
| FMN2     | 56776  | Leukemia, MESH:D015473     | Arsenic[Ar   | 22.43 | 265 |
| HEY2     | 23493  | Leukemia, MESH:D015470     | Air Polluta  | 22.43 | 27  |
| LPL      | 4023   | Leukemia, MESH:D015473     | Arsenic Tr   | 22.43 | 264 |
| NRN1     | 51299  | Leukemia, MESH:D015470     | Azacitidine  | 22.43 | 14  |
| NUMB     | 8650   | Leukemia, MESH:D015470     | Arsenic Tr   | 22.43 | 23  |
| PLCB3    | 5331   | Leukemia, MESH:D015470     | Calcitriol[C | 22.43 | 16  |
| RPLP2    | 6181   | Leukemia, MESH:D015470     | Calcitriol[C | 22.43 | 22  |
| SCEL     | 8796   | Leukemia, MESH:D015473     | Arsenic[Ca   | 22.43 | 157 |
| SELPLG   | 6404   | Leukemia, MESH:D015470     | Air Polluta  | 22.43 | 15  |
| SEMA6A   | 57556  | Leukemia, MESH:D015470     | Doxorubic    | 22.43 | 15  |
| SLC7A6   | 9057   | Leukemia, MESH:D015470     | Dexameth     | 22.43 | 17  |
| UBR4     | 23352  | Leukemia, MESH:D015470     | Dexameth     | 22.43 | 13  |
| XPOT     | 11260  | Leukemia, MESH:D015470     | Arsenic Tr   | 22.43 | 15  |
| APAF1    | 317    | Leukemia, MESH:D015473     | Arsenic[Ar   | 22.42 | 264 |
| DLC1     | 10395  | Leukemia, MESH:D015473     | Arsenic[Ar   | 22.42 | 263 |
| HGF      | 3082   | Leukemia, MESH:D015473     | Arsenic[Ar   | 22.42 | 264 |
| PDHA1    | 5160   | Leukemia, MESH:D015473     | Arsenic Tr   | 22.42 | 263 |
| RAC1     | 5879   | Leukemia, MESH:D015470     | Arsenic Tr   | 22.42 | 26  |
| SLIT3    | 6586   | Leukemia, MESH:D015473     | Arsenic[ar   | 22.42 | 163 |
| KIF11    | 3832   | Leukemia, MESH:D015470     | Calcitriol[C | 22.4  | 28  |
| NRAS     | 4893   | Leukemia, MESH:D01marker/m | Carboplati   | 22.39 | 42  |
| CAST     | 831    | Leukemia, MESH:D015470     | Doxorubic    | 22.39 | 25  |
| COMT     | 1312   | Leukemia, MESH:D015470     | Calcitriol[C | 22.39 | 24  |
| HNMT     | 3176   | Leukemia, MESH:D015470     | Arsenic Tr   | 22.39 | 16  |
| BECN1    | 8678   | Leukemia, MESH:D007948     | 2-(2-amin    | 22.37 | 3   |
| CYP2B6   | 1555   | Leukemia, MESH:D015470     | Alitretinoi  | 22.37 | 21  |
| MMP1     | 4312   | Leukemia, MESH:D007948     | 2-(2-amin    | 22.37 | 3   |
| ME1      | 4199   | Leukemia, MESH:D01marker/m | Antimony     | 22.36 | 264 |
| SLC4A7   | 9497   | Leukemia, MESH:D015473     | arsenite[Ci  | 22.36 | 160 |
| TJP1     | 7082   | Leukemia, MESH:D015473     | Arsenic[Ar   | 22.36 | 266 |
| ADRB2    | 154    | Leukemia, MESH:D015470     | Azacitidine  | 22.35 | 31  |
| OXTR     | 5021   | Leukemia, MESH:D015473     | arsenite[Ci  | 22.35 | 158 |
| PDE4DIP  | 9659   | Leukemia, MESH:D015473     | Arsenic[Ar   | 22.35 | 265 |
| PPARA    | 5465   | Leukemia, MESH:D015473     | alpha-Toc    | 22.35 | 270 |
| PTH1R    | 5745   | Leukemia, MESH:D015473     | Arsenic[Ca   | 22.35 | 160 |
| USP7     | 7874   | Leukemia, MESH:D015473     | Arsenic[ar   | 22.35 | 23  |
| FOXF2    | 2295   | Leukemia, MESH:D015473     | arsenite[Ci  | 22.34 | 12  |
| PDCD4    | 27250  | Leukemia, MESH:D015473     | Arsenic[Ar   | 22.34 | 266 |
| SC5D     | 6309   | Leukemia, MESH:D015470     | Benzene[C    | 22.34 | 27  |
| BAIAP2L1 | 55971  | Leukemia, MESH:D015470     | Arsenic Tr   | 22.33 | 89  |
| BCL2L13  | 23786  | Leukemia, MESH:D015470     | Azacitidine  | 22.33 | 12  |
| CCDC86   | 79080  | Leukemia, MESH:D015470     | Arsenic Tr   | 22.33 | 21  |
| CLYBL    | 171425 | Leukemia, MESH:D015470     | Daunorub     | 22.33 | 38  |
| DCP2     | 167227 | Leukemia, MESH:D015470     | Arsenic Tr   | 22.33 | 18  |
| EPSTI1   | 94240  | Leukemia, MESH:D015470     | Arsenic Tr   | 22.33 | 18  |
| FAM83H   | 286077 | Leukemia, MESH:D015470     | Calcitriol[C | 22.33 | 8   |
| GBP4     | 115361 | Leukemia, MESH:D015470     | Air Polluta  | 22.33 | 82  |
| GPATCH2  | 55668  | Leukemia, MESH:D015470     | Bortezomi    | 22.33 | 12  |
| LAD1     | 3898   | Leukemia, MESH:D015470     | Decitabine   | 22.33 | 17  |
| MFAP5    | 8076   | Leukemia, MESH:D015470     | Calcitriol[C | 22.33 | 18  |
| MYO1C    | 4641   | Leukemia, MESH:D015470     | Benzoates    | 22.33 | 14  |
| NDUFB6   | 4712   | Leukemia, MESH:D015470     | Dexameth     | 22.33 | 15  |
| PACSIN1  | 29993  | Leukemia, MESH:D015473     | Arsenic[Ca   | 22.33 | 156 |

|         |        |                        |              |       |     |
|---------|--------|------------------------|--------------|-------|-----|
| RAB3D   | 9545   | Leukemia, MESH:D015470 | Dexameth     | 22.33 | 16  |
| RPRD1A  | 55197  | Leukemia, MESH:D015470 | Doxorubic    | 22.33 | 18  |
| SLC12A5 | 57468  | Leukemia, MESH:D015470 | Decitabine   | 22.33 | 16  |
| SNX18   | 112574 | Leukemia, MESH:D015470 | Calcitriol I | 22.33 | 12  |
| TBCD    | 6904   | Leukemia, MESH:D015470 | Bortezomi    | 22.33 | 16  |
| TGDS    | 23483  | Leukemia, MESH:D015470 | Dronabinc    | 22.33 | 19  |
| TINAGL1 | 64129  | Leukemia, MESH:D015470 | Calcitriol E | 22.33 | 11  |
| AAMP    | 14     | Leukemia, MESH:D015470 | Air Polluta  | 22.32 | 20  |
| AFG3L2  | 10939  | Leukemia, MESH:D015470 | Dexameth     | 22.32 | 14  |
| CYP4V2  | 285440 | Leukemia, MESH:D015470 | Doxorubic    | 22.32 | 18  |
| ENOX1   | 55068  | Leukemia, MESH:D015470 | Decitabine   | 22.32 | 22  |
| LRP2    | 4036   | Leukemia, MESH:D015470 | Dronabinc    | 22.32 | 13  |
| LY6K    | 54742  | Leukemia, MESH:D015470 | Dexameth     | 22.32 | 9   |
| MIR143  | 406935 | Leukemia, MESH:D015470 | Air Polluta  | 22.32 | 20  |
| MTMR2   | 8898   | Leukemia, MESH:D015470 | Arsenic Tr   | 22.32 | 21  |
| N6AMT1  | 29104  | Leukemia, MESH:D015470 | Doxorubic    | 22.32 | 14  |
| NDFIP2  | 54602  | Leukemia, MESH:D015470 | Decitabine   | 22.32 | 20  |
| NLRP1   | 22861  | Leukemia, MESH:D015470 | Arsenic Tr   | 22.32 | 21  |
| NUDT19  | 390916 | Leukemia, MESH:D015470 | Dexameth     | 22.32 | 14  |
| PCDHGC3 | 5098   | Leukemia, MESH:D015470 | Doxorubic    | 22.32 | 16  |
| RNF11   | 26994  | Leukemia, MESH:D015470 | Bortezomi    | 22.32 | 16  |
| SLC44A5 | 204962 | Leukemia, MESH:D015470 | Calcitriol E | 22.32 | 17  |
| SNAP91  | 9892   | Leukemia, MESH:D015470 | Cytarabine   | 22.32 | 87  |
| TSPAN31 | 6302   | Leukemia, MESH:D015473 | Arsenic Tr   | 22.32 | 262 |
| CACYBP  | 27101  | Leukemia, MESH:D015470 | Doxorubic    | 22.31 | 18  |
| CCL22   | 6367   | Leukemia, MESH:D015470 | Allopurinc   | 22.31 | 22  |
| CMBL    | 134147 | Leukemia, MESH:D015470 | Decitabine   | 22.31 | 21  |
| ESPL1   | 9700   | Leukemia, MESH:D015470 | Calcitriol E | 22.31 | 13  |
| RPL6    | 6128   | Leukemia, MESH:D015470 | Arsenic Tr   | 22.31 | 33  |
| LIPC    | 3990   | Leukemia, MESH:D015473 | Arsenic De   | 22.3  | 156 |
| ABCC2   | 1244   | Leukemia, MESH:D004915 | Daunorub     | 22.29 | 4   |
| ARID5B  | 84159  | Leukemia, MESH:D015473 | Arsenic Ar   | 22.29 | 265 |
| FBXO32  | 114907 | Leukemia, MESH:D015473 | Arsenic Ar   | 22.29 | 160 |
| RPL17   | 6139   | Leukemia, MESH:D015473 | arsenic dis  | 22.29 | 159 |
| SLC11A2 | 4891   | Leukemia, MESH:D015470 | Air Polluta  | 22.28 | 16  |
| JUN     | 3725   | Leukemia, MESH:D007948 | 2-(2-amin    | 22.27 | 4   |
| MMP3    | 4314   | Leukemia, MESH:D015473 | arsenite ca  | 22.26 | 158 |
| SOCS3   | 9021   | Leukemia, MESH:D015473 | 2-(2-chlor   | 22.26 | 161 |
| CCL11   | 6356   | Leukemia, MESH:D015473 | Buthionine   | 22.25 | 9   |
| LUZP2   | 338645 | Leukemia, MESH:D015473 | Calcitriol E | 22.25 | 17  |
| NPIP3   | 23117  | Leukemia, MESH:D015473 | Dexameth     | 22.25 | 156 |
| POU5F1  | 5460   | Leukemia, MESH:D015473 | Arsenic Ar   | 22.25 | 264 |
| ATP5MJ  | 9556   | Leukemia, MESH:D015470 | Doxorubic    | 22.24 | 13  |
| FBN2    | 2201   | Leukemia, MESH:D015470 | Arsenic Tr   | 22.24 | 21  |
| NR2F1   | 7025   | Leukemia, MESH:D015470 | Calcitriol E | 22.24 | 18  |
| SLC4A1  | 6521   | Leukemia, MESH:D015470 | Dexameth     | 22.24 | 15  |
| ACO1    | 48     | Leukemia, MESH:D015470 | Arsenic Tr   | 22.23 | 31  |
| ACVRL1  | 94     | Leukemia, MESH:D015470 | Arsenic Tr   | 22.23 | 30  |
| ALPI    | 248    | Leukemia, MESH:D015470 | mangiferir   | 22.23 | 15  |
| ATXN1   | 6310   | Leukemia, MESH:D015473 | Arsenic Bu   | 22.23 | 160 |
| BMPR1B  | 658    | Leukemia, MESH:D015470 | Calcitriol E | 22.23 | 18  |
| CBX7    | 23492  | Leukemia, MESH:D015470 | Arsenic Tr   | 22.23 | 21  |
| CCDC92  | 80212  | Leukemia, MESH:D015470 | Arsenic Tr   | 22.23 | 20  |
| CLCN4   | 1183   | Leukemia, MESH:D015470 | Air Polluta  | 22.23 | 15  |
| CSF3R   | 1441   | Leukemia, MESH:D015470 | Calcitriol E | 22.23 | 17  |
| DCX     | 1641   | Leukemia, MESH:D015470 | Arsenic Tr   | 22.23 | 19  |
| DHRS9   | 10170  | Leukemia, MESH:D015473 | Antimony     | 22.23 | 265 |
| DUBR    | 344595 | Leukemia, MESH:D015470 | Doxorubic    | 22.23 | 14  |

|           |        |                        |              |       |     |
|-----------|--------|------------------------|--------------|-------|-----|
| EEF1G     | 1937   | Leukemia, MESH:D015473 | Arsenic Ar   | 22.23 | 266 |
| F2        | 2147   | Leukemia, MESH:D015473 | arsenite C   | 22.23 | 161 |
| FIBIN     | 387758 | Leukemia, MESH:D015470 | Calcitriol E | 22.23 | 12  |
| FMOD      | 2331   | Leukemia, MESH:D015470 | Arsenic Tr   | 22.23 | 23  |
| FOXK2     | 3607   | Leukemia, MESH:D015473 | Arsenic Mi   | 22.23 | 156 |
| GTF2H1    | 2965   | Leukemia, MESH:D015470 | Air Polluta  | 22.23 | 20  |
| KCNAB2    | 8514   | Leukemia, MESH:D015470 | Doxorubic    | 22.23 | 32  |
| NFKBIZ    | 64332  | Leukemia, MESH:D015470 | Benzoates    | 22.23 | 21  |
| NREP      | 9315   | Leukemia, MESH:D015470 | Arsenic Tr   | 22.23 | 26  |
| PRUNE2    | 158471 | Leukemia, MESH:D015470 | Dexameth     | 22.23 | 17  |
| RAB5A     | 5868   | Leukemia, MESH:D015470 | Arsenic Tr   | 22.23 | 15  |
| RAD17     | 5884   | Leukemia, MESH:D015470 | Arsenic Tr   | 22.23 | 39  |
| RDH10     | 157506 | Leukemia, MESH:D015470 | Dasatinib    | 22.23 | 16  |
| SEPTIN11  | 55752  | Leukemia, MESH:D015470 | Arsenic Tr   | 22.23 | 23  |
| SOBP      | 55084  | Leukemia, MESH:D015470 | Dexameth     | 22.23 | 18  |
| SYT12     | 91683  | Leukemia, MESH:D015470 | Calcitriol E | 22.23 | 14  |
| TIMP4     | 7079   | Leukemia, MESH:D015470 | Decitabine   | 22.23 | 18  |
| AMOTL1    | 154810 | Leukemia, MESH:D015473 | arsenite D   | 22.22 | 159 |
| H2AC6     | 8334   | Leukemia, MESH:D015473 | Arsenic Ar   | 22.22 | 265 |
| LDLRAP1   | 26119  | Leukemia, MESH:D015473 | Arsenic Ca   | 22.22 | 156 |
| LRRN1     | 57633  | Leukemia, MESH:D015473 | Arsenic ar   | 22.22 | 157 |
| MNT       | 4335   | Leukemia, MESH:D015473 | Arsenic Tr   | 22.22 | 262 |
| RPLP0     | 6175   | Leukemia, MESH:D015473 | Arsenic Ar   | 22.22 | 265 |
| ARPC3     | 10094  | Leukemia, MESH:D015473 | Arsenic Tr   | 22.21 | 262 |
| BCHE      | 590    | Leukemia, MESH:D015473 | alpha-Toc    | 22.21 | 172 |
| WAS       | 7454   | Leukemia, MESH:D015473 | arsenite D   | 22.21 | 157 |
| C3        | 718    | Leukemia, MESH:D015473 | Arsenic Tr   | 22.2  | 263 |
| ACE       | 1636   | Leukemia, MESH:D015470 | Air Polluta  | 22.19 | 22  |
| DHX38     | 9785   | Leukemia, MESH:D015470 | Dexameth     | 22.18 | 14  |
| GEN1      | 348654 | Leukemia, MESH:D015470 | Calcitriol E | 22.18 | 13  |
| H2BC6     | 8344   | Leukemia, MESH:D015470 | Doxorubic    | 22.18 | 19  |
| MIR34C    | 407042 | Leukemia, MESH:D015470 | Arsenic Tr   | 22.18 | 43  |
| RPS6KB1   | 6198   | Leukemia, MESH:D007948 | 2-(2-amin    | 22.18 | 3   |
| ASB7      | 140460 | Leukemia, MESH:D015470 | Dexameth     | 22.17 | 15  |
| ATP8B1    | 5205   | Leukemia, MESH:D015470 | Calcitriol E | 22.17 | 16  |
| AVP       | 551    | Leukemia, MESH:D015470 | Chloroqui    | 22.17 | 21  |
| CADM1     | 23705  | Leukemia, MESH:D015470 | Arsenic Tr   | 22.17 | 30  |
| CHODL     | 140578 | Leukemia, MESH:D015470 | Arsenic Tr   | 22.17 | 21  |
| CNPY3     | 10695  | Leukemia, MESH:D015470 | Dexameth     | 22.17 | 14  |
| E2F6      | 1876   | Leukemia, MESH:D015470 | Arsenic Tr   | 22.17 | 35  |
| EIF1AD    | 84285  | Leukemia, MESH:D015470 | Dexameth     | 22.17 | 16  |
| EIF1B     | 10289  | Leukemia, MESH:D015470 | Air Polluta  | 22.17 | 14  |
| EVC       | 2121   | Leukemia, MESH:D015470 | Calcitriol E | 22.17 | 17  |
| HAUS6     | 54801  | Leukemia, MESH:D015470 | Arsenic Tr   | 22.17 | 20  |
| ICAM3     | 3385   | Leukemia, MESH:D015470 | Arsenic Tr   | 22.17 | 14  |
| ITFG2     | 55846  | Leukemia, MESH:D015470 | Doxorubic    | 22.17 | 14  |
| KLHL12    | 59349  | Leukemia, MESH:D015470 | Benzene E    | 22.17 | 34  |
| KLHL14    | 57565  | Leukemia, MESH:D015470 | Arsenic Tr   | 22.17 | 17  |
| MAP1LC3,  | 84557  | Leukemia, MESH:D015470 | Arsenic Tr   | 22.17 | 30  |
| MT1F      | 4494   | Leukemia, MESH:D015470 | Arsenic Tr   | 22.17 | 26  |
| PARN      | 5073   | Leukemia, MESH:D015470 | Arsenic Tr   | 22.17 | 16  |
| PDPK1     | 5170   | Leukemia, MESH:D015470 | Arsenic Tr   | 22.17 | 24  |
| PHLPP2    | 23035  | Leukemia, MESH:D015470 | Benzene E    | 22.17 | 23  |
| PRDX5     | 25824  | Leukemia, MESH:D015470 | Arsenic Tr   | 22.17 | 29  |
| RAB11FIP2 | 22841  | Leukemia, MESH:D015470 | Doxorubic    | 22.17 | 16  |
| SAMD8     | 142891 | Leukemia, MESH:D015470 | Air Polluta  | 22.17 | 20  |
| SCRN2     | 90507  | Leukemia, MESH:D015470 | Dexameth     | 22.17 | 13  |
| SLC4A8    | 9498   | Leukemia, MESH:D015470 | Cytarabine   | 22.17 | 81  |

|          |        |                             |              |       |     |
|----------|--------|-----------------------------|--------------|-------|-----|
| THAP1    | 55145  | Leukemia, MESH:D015470      | Dexameth     | 22.17 | 13  |
| TIMM22   | 29928  | Leukemia, MESH:D015470      | Dexameth     | 22.17 | 10  |
| TMSB15A  | 11013  | Leukemia, MESH:D015470      | Calcitriol E | 22.17 | 11  |
| TNFRSF18 | 8784   | Leukemia, MESH:D015470      | Arsenic Tr   | 22.17 | 21  |
| VAT1L    | 57687  | Leukemia, MESH:D015470      | Decitabine   | 22.17 | 20  |
| ZMYM6    | 9204   | Leukemia, MESH:D015470      | Decitabine   | 22.17 | 15  |
| ARG2     | 384    | Leukemia, MESH:D015473      | Arsenic ars  | 22.16 | 25  |
| ARPC1B   | 10095  | Leukemia, MESH:D015473      | Arsenic Tr   | 22.16 | 262 |
| F13A1    | 2162   | Leukemia, MESH:D015473      | Arsenic Tr   | 22.16 | 260 |
| NCOA1    | 8648   | Leukemia, MESH:D015473      | arsenite Ci  | 22.16 | 158 |
| NR1H2    | 7376   | Leukemia, MESH:D015473      | Arsenic Ar   | 22.16 | 263 |
| ORC6     | 23594  | Leukemia, MESH:D015473      | arsenite Ci  | 22.16 | 158 |
| OXCT1    | 5019   | Leukemia, MESH:D015473      | Arsenic De   | 22.16 | 160 |
| RASGRP1  | 10125  | Leukemia, MESH:D015473      | arsenite D   | 22.16 | 157 |
| SRGN     | 5552   | Leukemia, MESH:D015473      | Arsenic Tr   | 22.16 | 266 |
| WSB1     | 26118  | Leukemia, MESH:D015473      | Arsenic ars  | 22.16 | 161 |
| ATF7IP   | 55729  | Leukemia, MESH:D015470      | Doxorubic    | 22.13 | 17  |
| CEP57    | 9702   | Leukemia, MESH:D015470      | Arsenic Tr   | 22.13 | 29  |
| FRMD4B   | 23150  | Leukemia, MESH:D015470      | Doxorubic    | 22.13 | 16  |
| HIVEP3   | 59269  | Leukemia, MESH:D015470      | Dexameth     | 22.13 | 14  |
| HNRNPR   | 10236  | Leukemia, MESH:D015470      | Arsenic Tr   | 22.13 | 21  |
| ICA1     | 3382   | Leukemia, MESH:D015470      | Cyclophos    | 22.13 | 15  |
| MBNL3    | 55796  | Leukemia, MESH:D015470      | Decitabine   | 22.13 | 24  |
| NDE1     | 54820  | Leukemia, MESH:D015470      | Calcitriol E | 22.13 | 18  |
| NMT2     | 9397   | Leukemia, MESH:D015470      | Arsenic Tr   | 22.13 | 28  |
| OGFRL1   | 79627  | Leukemia, MESH:D015470      | Azacitidine  | 22.13 | 17  |
| RBM17    | 84991  | Leukemia, MESH:D015473      | Arsenic Tr   | 22.13 | 159 |
| RBM24    | 221662 | Leukemia, MESH:D015470      | Calcitriol I | 22.13 | 12  |
| SIX1     | 6495   | Leukemia, MESH:D015470      | Dexameth     | 22.13 | 14  |
| CD58     | 965    | Leukemia, MESH:D015473      | Arsenic Ge   | 22.12 | 156 |
| SOX10    | 6663   | Leukemia, MESH:D015473      | caffeic aci  | 22.12 | 153 |
| TCIM     | 56892  | Leukemia, MESH:D015470      | Arsenic Tr   | 22.12 | 20  |
| TLE4     | 7091   | Leukemia, MESH:D015470      | Decitabine   | 22.12 | 17  |
| VEZF1    | 7716   | Leukemia, MESH:D015473      | Cytarabine   | 22.12 | 160 |
| FES      | 2242   | Leukemia, MESH:D015473      | Arsenic De   | 22.11 | 162 |
| SOX3     | 6658   | Leukemia, MESH:D015473      | arsenite Ci  | 22.11 | 160 |
| CALB1    | 793    | Leukemia, MESH:D015473      | arsenite Ci  | 22.1  | 159 |
| CASP8    | 841    | Leukemia, MESH:D007948      | 2-(2-amin    | 22.1  | 4   |
| STARD4   | 134429 | Leukemia, MESH:D015473      | Arsenic Ar   | 22.1  | 265 |
| VEZF1    | 7716   | Leukemia, MESH:D004915      | Cytarabine   | 22.1  | 3   |
| ADCY7    | 113    | Leukemia, MESH:D015473      | arsenite Ci  | 22.09 | 156 |
| FOLR1    | 2348   | Leukemia, MESH:D015470      | Air Polluta  | 22.09 | 17  |
| KLF15    | 28999  | Leukemia, MESH:D015470      | Dexameth     | 22.09 | 17  |
| TPO      | 7173   | Leukemia, MESH:D015470      | Arsenic Tr   | 22.09 | 24  |
| FGF2     | 2247   | Leukemia, MESH:D007948      | 2-(2-amin    | 22.07 | 3   |
| SCARB1   | 949    | Leukemia, MESH:D015473      | Arsenic Ch   | 22.07 | 159 |
| HSPB1    | 3315   | Leukemia, MESH:D007948      | 2-(2-amin    | 22.06 | 3   |
| ITGB1BP3 | 415448 | Leukemia, MESH:D015470      | Decitabine   | 22.06 | 21  |
| BAD      | 572    | Leukemia, MESH:D007948      | 2-(2-amin    | 22.05 | 3   |
| CYBA     | 1535   | Leukemia, MESH:D004915      | Cytarabine   | 22.04 | 3   |
| GC       | 2638   | Leukemia, MESH:D015473      | arsenite Bi  | 22.04 | 156 |
| ETV6     | 2120   | Leukemia, MESH:D01marker/mi | Doxorubic    | 22.03 | 24  |
| AKT2     | 208    | Leukemia, MESH:D015473      | Arsenic Tr   | 22.03 | 264 |
| CCDC186  | 55088  | Leukemia, MESH:D015470      | Bortezomi    | 22.03 | 13  |
| CDCP1    | 64866  | Leukemia, MESH:D015470      | Benzene C    | 22.03 | 28  |
| CENPM    | 79019  | Leukemia, MESH:D015470      | Calcitriol E | 22.03 | 16  |
| COA7     | 65260  | Leukemia, MESH:D015470      | Etoposide    | 22.03 | 19  |
| CST6     | 1474   | Leukemia, MESH:D015470      | Calcitriol E | 22.03 | 19  |

|          |        |                            |              |       |     |
|----------|--------|----------------------------|--------------|-------|-----|
| DNER     | 92737  | Leukemia, MESH:D015470     | Calcitriol E | 22.03 | 12  |
| DTL      | 51514  | Leukemia, MESH:D015473     | Arsenic Tr   | 22.03 | 262 |
| EVI2A    | 2123   | Leukemia, MESH:D015470     | Arsenic Tr   | 22.03 | 30  |
| GPRC5C   | 55890  | Leukemia, MESH:D015470     | Cytarabine   | 22.03 | 79  |
| IGSF3    | 3321   | Leukemia, MESH:D015470     | Calcitriol E | 22.03 | 23  |
| IRF5     | 3663   | Leukemia, MESH:D015470     | Dexameth     | 22.03 | 12  |
| LMO4     | 8543   | Leukemia, MESH:D015470     | Doxorubic    | 22.03 | 17  |
| LRRFIP1  | 9208   | Leukemia, MESH:D015473     | Arsenic Ar   | 22.03 | 267 |
| MCPT1    | 17224  | Leukemia, MESH:D015470     | Air Polluta  | 22.03 | 12  |
| METAP1   | 23173  | Leukemia, MESH:D015470     | Air Polluta  | 22.03 | 19  |
| MMP11    | 4320   | Leukemia, MESH:D015470     | Cyclophos    | 22.03 | 15  |
| MRPS12   | 6183   | Leukemia, MESH:D015470     | Arsenic Tr   | 22.03 | 16  |
| N4BP2L1  | 90634  | Leukemia, MESH:D015470     | Arsenic Tr   | 22.03 | 22  |
| NUDT14   | 256281 | Leukemia, MESH:D015470     | Decitabine   | 22.03 | 15  |
| PIGW     | 284098 | Leukemia, MESH:D015470     | Calcitriol E | 22.03 | 15  |
| PRRX1    | 5396   | Leukemia, MESH:D015470     | Dexameth     | 22.03 | 16  |
| TAB3     | 257397 | Leukemia, MESH:D015470     | Doxorubic    | 22.03 | 14  |
| THAP11   | 57215  | Leukemia, MESH:D015470     | Dexameth     | 22.03 | 16  |
| TNNT1    | 7138   | Leukemia, MESH:D015470     | Calcitriol E | 22.03 | 53  |
| TNPO2    | 30000  | Leukemia, MESH:D015470     | Calcitriol E | 22.03 | 12  |
| ZFP64    | 55734  | Leukemia, MESH:D015470     | Azacitidine  | 22.03 | 15  |
| SPRY4    | 81848  | Leukemia, MESH:D01marker/m | Dexameth     | 22.02 | 20  |
| ARHGAP2  | 201176 | Leukemia, MESH:D015470     | Decitabine   | 22.02 | 19  |
| BVES     | 11149  | Leukemia, MESH:D015470     | Arsenic Tr   | 22.02 | 19  |
| CNNM4    | 26504  | Leukemia, MESH:D015470     | Arsenic Tr   | 22.02 | 22  |
| COG3     | 83548  | Leukemia, MESH:D015470     | Dexameth     | 22.02 | 15  |
| CPTP     | 80772  | Leukemia, MESH:D015470     | Arsenic Tr   | 22.02 | 20  |
| CYGB     | 114757 | Leukemia, MESH:D015470     | Arsenic Tr   | 22.02 | 29  |
| DEF8     | 54849  | Leukemia, MESH:D015470     | Calcitriol E | 22.02 | 16  |
| EDEM2    | 55741  | Leukemia, MESH:D015470     | Dexameth     | 22.02 | 9   |
| ISM1     | 140862 | Leukemia, MESH:D015470     | Calcitriol E | 22.02 | 9   |
| NCAPH    | 23397  | Leukemia, MESH:D015470     | Arsenic Tr   | 22.02 | 24  |
| NPY6R    | 4888   | Leukemia, MESH:D015470     | Arsenic Tr   | 22.02 | 18  |
| RMI1     | 80010  | Leukemia, MESH:D015470     | Calcitriol E | 22.02 | 11  |
| ROGDI    | 79641  | Leukemia, MESH:D015470     | Dexameth     | 22.02 | 14  |
| SCML1    | 6322   | Leukemia, MESH:D015470     | Dexameth     | 22.02 | 14  |
| SLAIN1   | 122060 | Leukemia, MESH:D015470     | Arsenic Tr   | 22.02 | 20  |
| SLC41A3  | 54946  | Leukemia, MESH:D015470     | Arsenic Tr   | 22.02 | 16  |
| SUPV3L1  | 6832   | Leukemia, MESH:D015470     | Dexameth     | 22.02 | 14  |
| SYK      | 6850   | Leukemia, MESH:D015470     | Air Polluta  | 22.02 | 25  |
| TMEM208  | 29100  | Leukemia, MESH:D015470     | Decitabine   | 22.02 | 20  |
| TNFRSF10 | 8793   | Leukemia, MESH:D015470     | Arsenic Tr   | 22.02 | 21  |
| CENPL    | 91687  | Leukemia, MESH:D015473     | Arsenic ars  | 22.01 | 158 |
| TPK1     | 27010  | Leukemia, MESH:D015473     | Arsenic ars  | 22.01 | 21  |
| H4F16    | 320332 | Leukemia, MESH:D015470     | Alitretinoin | 22    | 20  |
| KNG1     | 3827   | Leukemia, MESH:D015470     | Dexameth     | 22    | 19  |
| UQCR10   | 29796  | Leukemia, MESH:D015473     | Arsenic ars  | 22    | 160 |
| B2M      | 567    | Leukemia, MESH:D015473     | Arsenic Ca   | 21.99 | 162 |
| ZNF574   | 64763  | Leukemia, MESH:D015470     | Dexameth     | 21.99 | 12  |
| ANO2     | 57101  | Leukemia, MESH:D015470     | Dexameth     | 21.98 | 15  |
| C9ORF40  | 55071  | Leukemia, MESH:D015470     | Calcitriol F | 21.98 | 10  |
| SNCA     | 6622   | Leukemia, MESH:D015473     | alpha-Toc    | 21.98 | 270 |
| CRABP2   | 1382   | Leukemia, MESH:D015473     | alpha-Toc    | 21.97 | 159 |
| DEPTOR   | 64798  | Leukemia, MESH:D015473     | Cytarabine   | 21.97 | 158 |
| EEF1A2   | 1917   | Leukemia, MESH:D015473     | Arsenic Tr   | 21.97 | 263 |
| KNSTRN   | 90417  | Leukemia, MESH:D015473     | arsenite Ci  | 21.97 | 157 |
| PXN      | 5829   | Leukemia, MESH:D015473     | arsenite D   | 21.97 | 156 |
| INS1     | 16333  | Leukemia, MESH:D015473     | alpha-Toc    | 21.96 | 163 |



|          |        |                            |              |       |     |
|----------|--------|----------------------------|--------------|-------|-----|
| DDX5     | 1655   | Leukemia, MESH:D015470     | Arsenic Tr   | 21.95 | 19  |
| GLI2     | 2736   | Leukemia, MESH:D015470     | Arsenic Tr   | 21.95 | 22  |
| HEY1     | 23462  | Leukemia, MESH:D015470     | Arsenic Tr   | 21.95 | 87  |
| PIK3CA   | 5290   | Leukemia, MESH:D015473     | Arsenic Tr   | 21.95 | 262 |
| SLIT2    | 9353   | Leukemia, MESH:D015470     | Cytarabine   | 21.95 | 90  |
| TNFAIP6  | 7130   | Leukemia, MESH:D015473     | Arsenic Ar   | 21.95 | 265 |
| CSF2     | 1437   | Leukemia, MESH:D007948     | 2-(2-amin    | 21.94 | 3   |
| UGT1A1   | 54658  | Leukemia, MESH:D015473     | alpha-Toc    | 21.94 | 160 |
| ABCD2    | 225    | Leukemia, MESH:D015470     | Dexameth     | 21.93 | 12  |
| AGPAT2   | 10555  | Leukemia, MESH:D015470     | Arsenic Tr   | 21.93 | 23  |
| ATP8A1   | 10396  | Leukemia, MESH:D015470     | Arsenic Tr   | 21.93 | 24  |
| CCND3    | 896    | Leukemia, MESH:D004915     | Cytarabine   | 21.93 | 3   |
| CELF1    | 10658  | Leukemia, MESH:D015470     | Dexameth     | 21.93 | 19  |
| CKAP2L   | 150468 | Leukemia, MESH:D015470     | Calcitriol C | 21.93 | 17  |
| FGF12    | 2257   | Leukemia, MESH:D015470     | Arsenic Tr   | 21.93 | 22  |
| GSDMD    | 79792  | Leukemia, MESH:D015470     | Paclitaxel I | 21.93 | 13  |
| HDAC7    | 51564  | Leukemia, MESH:D015470     | Decitabine   | 21.93 | 20  |
| KANK4    | 163782 | Leukemia, MESH:D015470     | Arsenic Tr   | 21.93 | 88  |
| KAT6B    | 23522  | Leukemia, MESH:D015470     | Arsenic Tr   | 21.93 | 20  |
| PCYT2    | 5833   | Leukemia, MESH:D015470     | Arsenic Tr   | 21.93 | 28  |
| PIMREG   | 54478  | Leukemia, MESH:D015470     | Calcitriol C | 21.93 | 15  |
| PLAA     | 9373   | Leukemia, MESH:D015470     | Bortezomi    | 21.93 | 16  |
| PRF1     | 5551   | Leukemia, MESH:D007948     | 2-(2-amin    | 21.93 | 3   |
| S1PR2    | 9294   | Leukemia, MESH:D015470     | Decitabine   | 21.93 | 18  |
| SFRP4    | 6424   | Leukemia, MESH:D015470     | Calcitriol C | 21.93 | 29  |
| SSBP1    | 6742   | Leukemia, MESH:D015470     | Arsenic Tr   | 21.93 | 23  |
| SSBP2    | 23635  | Leukemia, MESH:D015470     | Arsenic Tr   | 21.93 | 26  |
| TMTC2    | 160335 | Leukemia, MESH:D015470     | Arsenic Tr   | 21.93 | 22  |
| USP5     | 8078   | Leukemia, MESH:D015470     | Bortezomi    | 21.93 | 11  |
| IDH2     | 3418   | Leukemia, MESH:D01marker/m | Arsenic Tr   | 21.91 | 25  |
| ATG12    | 9140   | Leukemia, MESH:D015473     | Arsenic Tr   | 21.91 | 263 |
| BMP6     | 654    | Leukemia, MESH:D015473     | Antimony     | 21.91 | 158 |
| BTBD3    | 22903  | Leukemia, MESH:D015473     | Arsenic Ar   | 21.91 | 165 |
| C15ORF4E | 84419  | Leukemia, MESH:D015473     | Arsenic Ar   | 21.91 | 262 |
| METTL7A  | 25840  | Leukemia, MESH:D015473     | Arsenic Ca   | 21.91 | 159 |
| NPC2     | 10577  | Leukemia, MESH:D015473     | arsenite D   | 21.91 | 161 |
| NPY      | 4852   | Leukemia, MESH:D015470     | Arsenic Tr   | 21.91 | 87  |
| OLFML3   | 56944  | Leukemia, MESH:D015473     | Arsenic Tr   | 21.91 | 263 |
| PRMT1    | 3276   | Leukemia, MESH:D015473     | Arsenic Tr   | 21.91 | 262 |
| CHCHD2   | 51142  | Leukemia, MESH:D015473     | Arsenic ar:  | 21.9  | 159 |
| LHX6     | 26468  | Leukemia, MESH:D015473     | Arsenic Tr   | 21.9  | 262 |
| MYO9B    | 4650   | Leukemia, MESH:D015473     | Arsenic Ar   | 21.9  | 265 |
| NDUFB4   | 4710   | Leukemia, MESH:D015473     | arsenite D   | 21.9  | 158 |
| SHOX2    | 6474   | Leukemia, MESH:D015473     | arsenite C:  | 21.9  | 155 |
| SRGAP1   | 57522  | Leukemia, MESH:D015473     | Arsenic ar:  | 21.9  | 158 |
| TRIM38   | 10475  | Leukemia, MESH:D004915     | Doxorubic    | 21.9  | 3   |
| COX1     | 4512   | Leukemia, MESH:D015470     | Arsenic Tr   | 21.89 | 26  |
| NR4A3    | 8013   | Leukemia, MESH:D015470     | Air Polluta  | 21.89 | 34  |
| ACAD8    | 27034  | Leukemia, MESH:D015470     | Dexameth     | 21.88 | 14  |
| ALG8     | 79053  | Leukemia, MESH:D015470     | Doxorubic    | 21.88 | 15  |
| CHST7    | 56548  | Leukemia, MESH:D015470     | Benzene C    | 21.88 | 24  |
| EYA3     | 2140   | Leukemia, MESH:D015470     | Dexameth     | 21.88 | 16  |
| H1-5     | 3009   | Leukemia, MESH:D015470     | Calcitriol C | 21.88 | 17  |
| HAPLN3   | 145864 | Leukemia, MESH:D015470     | Dasatinib I  | 21.88 | 14  |
| LGI1     | 9211   | Leukemia, MESH:D015470     | Arsenic Tr   | 21.88 | 25  |
| MT1      | 17748  | Leukemia, MESH:D015473     | Arsenic ar:  | 21.88 | 161 |
| NBEAL2   | 23218  | Leukemia, MESH:D015470     | Dexameth     | 21.88 | 14  |
| RASL12   | 51285  | Leukemia, MESH:D015470     | Decitabine   | 21.88 | 19  |

|          |        |                            |              |       |     |
|----------|--------|----------------------------|--------------|-------|-----|
| RILPL1   | 353116 | Leukemia, MESH:D015470     | Decitabine   | 21.88 | 15  |
| SETMAR   | 6419   | Leukemia, MESH:D015470     | Arsenic Tr   | 21.88 | 20  |
| SHROOM   | 57477  | Leukemia, MESH:D015470     | Dexameth     | 21.88 | 16  |
| SLC26A11 | 284129 | Leukemia, MESH:D015470     | Bortezomi    | 21.88 | 15  |
| SNX13    | 23161  | Leukemia, MESH:D015470     | Decitabine   | 21.88 | 21  |
| TMEM184  | 25829  | Leukemia, MESH:D015470     | Doxorubic    | 21.88 | 14  |
| TOMM34   | 10953  | Leukemia, MESH:D015470     | Arsenic Tr   | 21.88 | 16  |
| WDR44    | 54521  | Leukemia, MESH:D015470     | Bortezomi    | 21.88 | 13  |
| CDKN1C   | 1028   | Leukemia, MESH:D015473     | Arsenic ar   | 21.87 | 163 |
| TM7SF2   | 7108   | Leukemia, MESH:D015470     | Chloroqui    | 21.87 | 11  |
| MAOB     | 4129   | Leukemia, MESH:D015470     | Calcitriol C | 21.86 | 21  |
| MGST1    | 4257   | Leukemia, MESH:D015470     | Arsenic Tr   | 21.86 | 25  |
| BCAR1    | 9564   | Leukemia, MESH:D015473     | Arsenic Ar   | 21.85 | 265 |
| FLNC     | 2318   | Leukemia, MESH:D015473     | arsenite Ci  | 21.85 | 158 |
| GREM1    | 26585  | Leukemia, MESH:D015473     | Arsenic Tr   | 21.85 | 263 |
| TFDP1    | 7027   | Leukemia, MESH:D015473     | Arsenic Ar   | 21.85 | 268 |
| PLEC     | 5339   | Leukemia, MESH:D015473     | Arsenic ar   | 21.84 | 160 |
| PTMA     | 5757   | Leukemia, MESH:D015473     | Arsenic Tr   | 21.84 | 261 |
| SEPTIN9  | 10801  | Leukemia, MESH:D01marker/m | Decitabine   | 21.83 | 18  |
| ADCY1    | 107    | Leukemia, MESH:D015470     | Arsenic Tr   | 21.83 | 20  |
| AFAP1    | 60312  | Leukemia, MESH:D015470     | Arsenic Tr   | 21.83 | 16  |
| CAP2     | 10486  | Leukemia, MESH:D015470     | Dexameth     | 21.83 | 18  |
| CCL1     | 6346   | Leukemia, MESH:D015470     | Arsenic Tr   | 21.83 | 20  |
| CDK9     | 1025   | Leukemia, MESH:D015470     | alvocidib L  | 21.83 | 16  |
| COL27A1  | 85301  | Leukemia, MESH:D015470     | Doxorubic    | 21.83 | 16  |
| CYP7B1   | 9420   | Leukemia, MESH:D015470     | Arsenic Tr   | 21.83 | 38  |
| EBI3     | 10148  | Leukemia, MESH:D015470     | Decitabine   | 21.83 | 22  |
| EHD2     | 30846  | Leukemia, MESH:D015470     | Doxorubic    | 21.83 | 15  |
| GLIPR2   | 152007 | Leukemia, MESH:D015470     | Calcitriol C | 21.83 | 12  |
| IL12B    | 3593   | Leukemia, MESH:D007948     | 2-(2-amin    | 21.83 | 3   |
| KDM5B    | 10765  | Leukemia, MESH:D015470     | Benzene C    | 21.83 | 31  |
| LSR      | 51599  | Leukemia, MESH:D015470     | Arsenic Tr   | 21.83 | 29  |
| ME3      | 10873  | Leukemia, MESH:D015470     | Dexameth     | 21.83 | 10  |
| MFN2     | 9927   | Leukemia, MESH:D015470     | Arsenic Tr   | 21.83 | 23  |
| MMP15    | 4324   | Leukemia, MESH:D015470     | Decitabine   | 21.83 | 25  |
| MYO5B    | 4645   | Leukemia, MESH:D015470     | Arsenic Tr   | 21.83 | 20  |
| OAS3     | 4940   | Leukemia, MESH:D015470     | Air Polluta  | 21.83 | 15  |
| PKIB     | 5570   | Leukemia, MESH:D015470     | Arsenic Tr   | 21.83 | 23  |
| PIIB     | 5479   | Leukemia, MESH:D015470     | Dexameth     | 21.83 | 15  |
| SMIM3    | 85027  | Leukemia, MESH:D015470     | Calcitriol C | 21.83 | 11  |
| TICAM1   | 148022 | Leukemia, MESH:D015470     | Dexameth     | 21.83 | 17  |
| TNFSF12  | 8742   | Leukemia, MESH:D015470     | Arsenic Tr   | 21.83 | 21  |
| TSHZ1    | 10194  | Leukemia, MESH:D015470     | Doxorubic    | 21.83 | 20  |
| AHI1     | 54806  | Leukemia, MESH:D015473     | Arsenic Cy   | 21.82 | 155 |
| EIF2AK3  | 9451   | Leukemia, MESH:D015473     | Arsenic Ar   | 21.82 | 267 |
| APBB1    | 322    | Leukemia, MESH:D015473     | Arsenic Ar   | 21.8  | 262 |
| CLK1     | 1195   | Leukemia, MESH:D015470     | Air Polluta  | 21.8  | 23  |
| KRT6A    | 3853   | Leukemia, MESH:D015473     | Arsenic Ar   | 21.8  | 266 |
| MALL     | 7851   | Leukemia, MESH:D015473     | Arsenic Tr   | 21.8  | 156 |
| MSC      | 9242   | Leukemia, MESH:D015473     | Arsenic Tr   | 21.8  | 262 |
| PIK3R3   | 8503   | Leukemia, MESH:D015470     | Alitretnoi   | 21.8  | 17  |
| SYNCRIP  | 10492  | Leukemia, MESH:D015470     | Arsenic Tr   | 21.8  | 31  |
| TMEM107  | 84314  | Leukemia, MESH:D015473     | Arsenic Tr   | 21.8  | 157 |
| TRAF6    | 7189   | Leukemia, MESH:D015470     | Arsenic Tr   | 21.8  | 23  |
| TRIM38   | 10475  | Leukemia, MESH:D015473     | arsenite Ci  | 21.8  | 155 |
| DSC2     | 1824   | Leukemia, MESH:D015473     | Arsenic Ar   | 21.79 | 268 |
| LMCD1    | 29995  | Leukemia, MESH:D015473     | Calcitriol C | 21.79 | 20  |
| SPON2    | 10417  | Leukemia, MESH:D015473     | Arsenic Tr   | 21.79 | 263 |

|          |        |                            |              |       |     |
|----------|--------|----------------------------|--------------|-------|-----|
| SPRY2    | 10253  | Leukemia, MESH:D015473     | Arsenic ars  | 21.79 | 161 |
| DNMT3B   | 1789   | Leukemia, MESH:D015470     | Arsenic Tr   | 21.78 | 33  |
| MAPK14   | 1432   | Leukemia, MESH:D007948     | 2-(2-amin    | 21.78 | 3   |
| AIF1     | 199    | Leukemia, MESH:D015470     | Arsenic Tr   | 21.77 | 38  |
| NR4A1    | 3164   | Leukemia, MESH:D015473     | Arsenic Ar   | 21.76 | 267 |
| CKMT1A   | 548596 | Leukemia, MESH:D015470     | Dexameth     | 21.75 | 9   |
| IL18     | 3606   | Leukemia, MESH:D015473     | Arsenic Tr   | 21.75 | 263 |
| SIRT1    | 23411  | Leukemia, MESH:D015473     | arsenic dis  | 21.75 | 158 |
| SLC22A16 | 85413  | Leukemia, MESH:D015470     | Daunorub     | 21.75 | 38  |
| TRABD2A  | 129293 | Leukemia, MESH:D015470     | Dexameth     | 21.75 | 9   |
| ADA2     | 51816  | Leukemia, MESH:D015470     | Doxorubic    | 21.74 | 13  |
| APOL3    | 80833  | Leukemia, MESH:D015470     | Dexameth     | 21.74 | 14  |
| ATN1     | 1822   | Leukemia, MESH:D015470     | Arsenic Tr   | 21.74 | 87  |
| AZI2     | 64343  | Leukemia, MESH:D015470     | Decitabine   | 21.74 | 20  |
| CARD16   | 114769 | Leukemia, MESH:D015470     | Arsenic Tr   | 21.74 | 19  |
| CARM1    | 10498  | Leukemia, MESH:D015470     | Arsenic Tr   | 21.74 | 19  |
| CECR2    | 27443  | Leukemia, MESH:D015470     | Doxorubic    | 21.74 | 14  |
| CWC27    | 10283  | Leukemia, MESH:D015470     | Daunorub     | 21.74 | 35  |
| DBF4B    | 80174  | Leukemia, MESH:D015470     | Calcitriol C | 21.74 | 12  |
| DLX4     | 1748   | Leukemia, MESH:D015470     | Arsenic Tr   | 21.74 | 15  |
| FGFR1    | 2260   | Leukemia, MESH:D015473     | Arsenic Tr   | 21.74 | 266 |
| HIF1A    | 3091   | Leukemia, MESH:D004915     | Cytarabine   | 21.74 | 3   |
| HMGR     | 3156   | Leukemia, MESH:D015470     | Benzene B    | 21.74 | 39  |
| JOSD1    | 9929   | Leukemia, MESH:D015470     | Air Polluta  | 21.74 | 22  |
| LGALS1   | 3956   | Leukemia, MESH:D015473     | Arsenic Tr   | 21.74 | 267 |
| MAD1L1   | 8379   | Leukemia, MESH:D015470     | Azacitidine  | 21.74 | 16  |
| MICALL2  | 79778  | Leukemia, MESH:D015470     | Dexameth     | 21.74 | 14  |
| ND1      | 4535   | Leukemia, MESH:D015470     | Chlorampl    | 21.74 | 18  |
| NDFIP1   | 80762  | Leukemia, MESH:D015470     | Dexameth     | 21.74 | 9   |
| PFDN4    | 5203   | Leukemia, MESH:D015470     | Bortezomi    | 21.74 | 15  |
| PHIP     | 55023  | Leukemia, MESH:D015470     | Doxorubic    | 21.74 | 16  |
| TOM1L2   | 146691 | Leukemia, MESH:D015470     | Dexameth     | 21.74 | 9   |
| TTC14    | 151613 | Leukemia, MESH:D015470     | Dexameth     | 21.74 | 13  |
| VIPR1    | 7433   | Leukemia, MESH:D015470     | Alitretinoi  | 21.74 | 12  |
| WDR74    | 54663  | Leukemia, MESH:D015470     | Bortezomi    | 21.74 | 10  |
| ZBTB2    | 57621  | Leukemia, MESH:D015470     | Doxorubic    | 21.74 | 15  |
| ZNF493   | 284443 | Leukemia, MESH:D015470     | Dexameth     | 21.74 | 12  |
| TRH      | 7200   | Leukemia, MESH:D01marker/m | Azacitidine  | 21.73 | 22  |
| E2F7     | 144455 | Leukemia, MESH:D015473     | Arsenic ars  | 21.73 | 14  |
| EEPD1    | 80820  | Leukemia, MESH:D015470     | Calcitriol C | 21.73 | 10  |
| EWSR1    | 2130   | Leukemia, MESH:D015470     | Arsenic Tr   | 21.73 | 23  |
| GAMT     | 2593   | Leukemia, MESH:D015470     | Cyclophos    | 21.73 | 17  |
| IL1RAP   | 3556   | Leukemia, MESH:D015470     | Benzene C    | 21.73 | 31  |
| INSIG1   | 3638   | Leukemia, MESH:D015473     | Arsenic Tr   | 21.73 | 262 |
| LGALS3BP | 3959   | Leukemia, MESH:D015470     | Arsenic Tr   | 21.73 | 21  |
| RPL13    | 6137   | Leukemia, MESH:D015470     | Dexameth     | 21.73 | 20  |
| STAT1    | 6772   | Leukemia, MESH:D007948     | 2-(2-amin    | 21.73 | 3   |
| TACC1    | 6867   | Leukemia, MESH:D015470     | Arsenic Tr   | 21.73 | 22  |
| TG       | 7038   | Leukemia, MESH:D015473     | Arsenic ca   | 21.73 | 158 |
| TSLP     | 85480  | Leukemia, MESH:D015473     | Arsenic ars  | 21.73 | 158 |
| IL33     | 90865  | Leukemia, MESH:D015470     | Air Polluta  | 21.72 | 18  |
| MIR125A  | 406910 | Leukemia, MESH:D015473     | Arsenic Tr   | 21.72 | 155 |
| SLC39A10 | 57181  | Leukemia, MESH:D015473     | Arsenic Ar   | 21.72 | 264 |
| SRM      | 6723   | Leukemia, MESH:D015473     | Calcitriol C | 21.72 | 155 |
| ANKRD22  | 118932 | Leukemia, MESH:D015473     | Arsenic ars  | 21.7  | 157 |
| ANXA3    | 306    | Leukemia, MESH:D015473     | Arsenic Ar   | 21.7  | 265 |
| ARPC5L   | 81873  | Leukemia, MESH:D015473     | Arsenic Ar   | 21.7  | 264 |
| MBTD1    | 54799  | Leukemia, MESH:D015473     | Calcitriol C | 21.7  | 157 |

|          |        |                            |              |       |     |
|----------|--------|----------------------------|--------------|-------|-----|
| PCK2     | 5106   | Leukemia, MESH:D015473     | Arsenic Tr   | 21.7  | 263 |
| RAB2A    | 5862   | Leukemia, MESH:D015473     | Arsenic Ar   | 21.7  | 262 |
| SKA3     | 221150 | Leukemia, MESH:D015473     | Calcitriol E | 21.7  | 155 |
| VDAC1    | 7416   | Leukemia, MESH:D015473     | Arsenic Tr   | 21.7  | 160 |
| ZHX3     | 23051  | Leukemia, MESH:D015473     | Arsenic Ar   | 21.69 | 263 |
| CD36     | 948    | Leukemia, MESH:D007948     | 2-(2-amin    | 21.68 | 3   |
| NRAS     | 4893   | Leukemia, MESH:D01marker/m | Arsenic De   | 21.67 | 25  |
| CD59     | 966    | Leukemia, MESH:D015473     | Arsenic Bu   | 21.67 | 157 |
| NRP2     | 8828   | Leukemia, MESH:D015473     | Arsenic ar   | 21.67 | 13  |
| PDCD4    | 27250  | Leukemia, MESH:D015470     | Arsenic Tr   | 21.67 | 25  |
| SELENBP1 | 8991   | Leukemia, MESH:D015470     | Androgen     | 21.67 | 19  |
| CROT     | 54677  | Leukemia, MESH:D015470     | Alitretinoi  | 21.66 | 13  |
| EREG     | 2069   | Leukemia, MESH:D015473     | Arsenic ar   | 21.66 | 158 |
| KRT7     | 3855   | Leukemia, MESH:D015470     | Alitretinoi  | 21.66 | 19  |
| L1CAM    | 3897   | Leukemia, MESH:D015470     | Decitabine   | 21.66 | 19  |
| MYOF     | 26509  | Leukemia, MESH:D015473     | Arsenic Tr   | 21.66 | 265 |
| PRKCE    | 5581   | Leukemia, MESH:D015473     | Arsenic Ar   | 21.66 | 262 |
| SLCO2A1  | 6578   | Leukemia, MESH:D015473     | Arsenic De   | 21.66 | 158 |
| AIG1     | 51390  | Leukemia, MESH:D015470     | Calcitriol E | 21.64 | 16  |
| BACE2    | 25825  | Leukemia, MESH:D015470     | Doxorubic    | 21.64 | 33  |
| BMP5     | 653    | Leukemia, MESH:D015470     | Cytarabine   | 21.64 | 88  |
| CD28     | 940    | Leukemia, MESH:D015470     | Air Polluta  | 21.64 | 13  |
| DDX39B   | 7919   | Leukemia, MESH:D015470     | Arsenic Tr   | 21.64 | 21  |
| DOCK4    | 9732   | Leukemia, MESH:D015470     | Calcitriol E | 21.64 | 18  |
| DPP7     | 29952  | Leukemia, MESH:D015470     | Dronabinc    | 21.64 | 19  |
| EXOSC8   | 11340  | Leukemia, MESH:D015470     | Calcitriol E | 21.64 | 15  |
| GMFB     | 2764   | Leukemia, MESH:D015470     | Dexameth     | 21.64 | 17  |
| ITGA2B   | 3674   | Leukemia, MESH:D007948     | Arsenic Tr   | 21.64 | 3   |
| LARP1B   | 55132  | Leukemia, MESH:D015470     | Calcitriol E | 21.64 | 13  |
| MOV10    | 4343   | Leukemia, MESH:D015470     | (+)-JQ1 c    | 21.64 | 11  |
| PAK2     | 5062   | Leukemia, MESH:D015470     | Arsenic Tr   | 21.64 | 23  |
| PLP2     | 5355   | Leukemia, MESH:D015470     | Decitabine   | 21.64 | 25  |
| PSMC3IP  | 29893  | Leukemia, MESH:D015470     | Bezafibrat   | 21.64 | 13  |
| REV1     | 51455  | Leukemia, MESH:D015470     | Cyclophos    | 21.64 | 15  |
| SEC31A   | 22872  | Leukemia, MESH:D015470     | Doxorubic    | 21.64 | 25  |
| SETBP1   | 26040  | Leukemia, MESH:D015470     | Dexameth     | 21.64 | 17  |
| SFXN2    | 118980 | Leukemia, MESH:D015470     | Doxorubic    | 21.64 | 16  |
| SYVN1    | 84447  | Leukemia, MESH:D015470     | Doxorubic    | 21.64 | 15  |
| TLR5     | 7100   | Leukemia, MESH:D015470     | Air Polluta  | 21.64 | 24  |
| COL1A1   | 1277   | Leukemia, MESH:D004915     | Cytarabine   | 21.63 | 4   |
| CYP2C19  | 1557   | Leukemia, MESH:D015470     | Bortezomi    | 21.63 | 22  |
| HAND2    | 9464   | Leukemia, MESH:D004915     | Cytarabine   | 21.62 | 2   |
| MT1A     | 4489   | Leukemia, MESH:D004915     | Cytarabine   | 21.62 | 3   |
| MYOM2    | 9172   | Leukemia, MESH:D015473     | Arsenic De   | 21.62 | 24  |
| S100A12  | 6283   | Leukemia, MESH:D015473     | Antimony     | 21.62 | 154 |
| SAT1     | 6303   | Leukemia, MESH:D015473     | Arsenic Tr   | 21.62 | 264 |
| SELENOP  | 6414   | Leukemia, MESH:D015473     | Arsenic Tr   | 21.62 | 262 |
| ALPL     | 249    | Leukemia, MESH:D015473     | Arsenic Tr   | 21.61 | 264 |
| CYP24A1  | 1591   | Leukemia, MESH:D015470     | Arsenic Tr   | 21.61 | 18  |
| NCAPG    | 64151  | Leukemia, MESH:D015473     | Calcitriol E | 21.61 | 156 |
| RIPPLY3  | 53820  | Leukemia, MESH:D015470     | Alitretinoi  | 21.61 | 23  |
| SLC2A14  | 144195 | Leukemia, MESH:D015470     | Calcitriol E | 21.61 | 16  |
| SOX17    | 64321  | Leukemia, MESH:D015473     | arsenite D   | 21.61 | 155 |
| SPATA5   | 166378 | Leukemia, MESH:D015470     | Bortezomi    | 21.61 | 13  |
| UGT1A5   | 54579  | Leukemia, MESH:D015470     | Alitretinoi  | 21.61 | 8   |
| VDR      | 7421   | Leukemia, MESH:D004915     | Cytarabine   | 21.61 | 2   |
| POU4F1   | 5457   | Leukemia, MESH:D01marker/m | Arsenic Tr   | 21.6  | 16  |
| BTRC     | 8945   | Leukemia, MESH:D015470     | Decitabine   | 21.6  | 16  |

|          |        |                        |              |       |     |
|----------|--------|------------------------|--------------|-------|-----|
| CCN2     | 1490   | Leukemia, MESH:D007948 | 2-(2-amin    | 21.6  | 3   |
| CGA      | 1081   | Leukemia, MESH:D015470 | 2-(2-chlor   | 21.6  | 21  |
| DDX50    | 79009  | Leukemia, MESH:D015470 | Decitabine   | 21.6  | 24  |
| DOK5     | 55816  | Leukemia, MESH:D015470 | Arsenic Tr   | 21.6  | 15  |
| EGFLAM   | 133584 | Leukemia, MESH:D015470 | Cytarabine   | 21.6  | 81  |
| EIF4G1   | 1981   | Leukemia, MESH:D015473 | Arsenic Tr   | 21.6  | 263 |
| FAM126A  | 84668  | Leukemia, MESH:D015470 | Calcitriol[C | 21.6  | 8   |
| FOXK1    | 221937 | Leukemia, MESH:D015470 | Calcitriol[C | 21.6  | 16  |
| GABRP    | 2568   | Leukemia, MESH:D015473 | Calcitriol[C | 21.6  | 156 |
| GLRB     | 2743   | Leukemia, MESH:D015470 | Cyclophos    | 21.6  | 14  |
| GOT2     | 2806   | Leukemia, MESH:D015473 | Arsenic[Ar   | 21.6  | 265 |
| GTF3C1   | 2975   | Leukemia, MESH:D015470 | Cyclophos    | 21.6  | 13  |
| HAS3     | 3038   | Leukemia, MESH:D015470 | Arsenic Tr   | 21.6  | 14  |
| MCAM     | 4162   | Leukemia, MESH:D015470 | Dasatinib I  | 21.6  | 24  |
| MEGF9    | 1955   | Leukemia, MESH:D015470 | Air Polluta  | 21.6  | 16  |
| MYDGF    | 56005  | Leukemia, MESH:D015470 | Cytarabine   | 21.6  | 81  |
| NDN      | 4692   | Leukemia, MESH:D015470 | Decitabine   | 21.6  | 20  |
| NECAB2   | 54550  | Leukemia, MESH:D015470 | Arsenic Tr   | 21.6  | 20  |
| NUDT21   | 11051  | Leukemia, MESH:D015473 | arsenite[D   | 21.6  | 158 |
| NUP107   | 57122  | Leukemia, MESH:D015470 | Arsenic Tr   | 21.6  | 17  |
| PAIP2B   | 400961 | Leukemia, MESH:D015470 | Dexameth     | 21.6  | 13  |
| POLR2I   | 5438   | Leukemia, MESH:D015470 | Dexameth     | 21.6  | 14  |
| PRRC1    | 133619 | Leukemia, MESH:D015470 | Arsenic Tr   | 21.6  | 14  |
| SCUBE3   | 222663 | Leukemia, MESH:D015470 | Dexameth     | 21.6  | 12  |
| SLITRK5  | 26050  | Leukemia, MESH:D015470 | Cytarabine   | 21.6  | 77  |
| SMAD1    | 4086   | Leukemia, MESH:D015473 | Arsenic[Ar   | 21.6  | 265 |
| TBC1D2B  | 23102  | Leukemia, MESH:D015470 | Air Polluta  | 21.6  | 22  |
| TMEM154  | 201799 | Leukemia, MESH:D015470 | Air Polluta  | 21.6  | 19  |
| TTYH1    | 57348  | Leukemia, MESH:D015470 | Calcitriol[C | 21.6  | 77  |
| UBALD2   | 283991 | Leukemia, MESH:D015470 | Dexameth     | 21.6  | 17  |
| VWA5A    | 4013   | Leukemia, MESH:D015473 | Arsenic Tr   | 21.6  | 157 |
| ADORA2B  | 136    | Leukemia, MESH:D015470 | Calcitriol[C | 21.59 | 13  |
| ANO2     | 57101  | Leukemia, MESH:D015473 | Dexameth     | 21.59 | 153 |
| BCAR3    | 8412   | Leukemia, MESH:D015470 | Cytarabine   | 21.59 | 84  |
| CEBPB    | 1051   | Leukemia, MESH:D007948 | 2-(2-amin    | 21.59 | 3   |
| CLDN5    | 7122   | Leukemia, MESH:D015470 | Arsenic Tr   | 21.59 | 23  |
| LAMA5    | 3911   | Leukemia, MESH:D015470 | Calcitriol[C | 21.59 | 23  |
| MAPK10   | 5602   | Leukemia, MESH:D015470 | Bortezomi    | 21.59 | 19  |
| SLC2A5   | 6518   | Leukemia, MESH:D015470 | Arsenic Tr   | 21.59 | 17  |
| COL4A1   | 1282   | Leukemia, MESH:D015473 | Arsenic[ar:  | 21.58 | 157 |
| IGFBP2   | 3485   | Leukemia, MESH:D015473 | Arsenic Tr   | 21.58 | 267 |
| AIFM1    | 9131   | Leukemia, MESH:D015473 | 2-(2-chlor   | 21.56 | 263 |
| RPSAP52  | 204010 | Leukemia, MESH:D015470 | Dasatinib I  | 21.56 | 5   |
| SP7      | 121340 | Leukemia, MESH:D007948 | 2-(2-amin    | 21.56 | 3   |
| ADAMTS4  | 9507   | Leukemia, MESH:D015470 | Arsenic Tr   | 21.55 | 21  |
| ARAP2    | 116984 | Leukemia, MESH:D015470 | Calcitriol[C | 21.55 | 19  |
| CABLES1  | 91768  | Leukemia, MESH:D015470 | Decitabine   | 21.55 | 18  |
| CDC42EP3 | 10602  | Leukemia, MESH:D015470 | Arsenic Tr   | 21.55 | 23  |
| CHRNA5   | 1138   | Leukemia, MESH:D015470 | Dexameth     | 21.55 | 14  |
| CIT      | 11113  | Leukemia, MESH:D015470 | Calcitriol[C | 21.55 | 18  |
| EOMES    | 8320   | Leukemia, MESH:D015470 | Air Polluta  | 21.55 | 13  |
| EVL      | 51466  | Leukemia, MESH:D015470 | Arsenic Tr   | 21.55 | 22  |
| FBN2     | 2201   | Leukemia, MESH:D015473 | Arsenic Tr   | 21.55 | 266 |
| GAS2     | 2620   | Leukemia, MESH:D015470 | Arsenic Tr   | 21.55 | 15  |
| HERC5    | 51191  | Leukemia, MESH:D015470 | Benzene[C    | 21.55 | 36  |
| KLF3     | 51274  | Leukemia, MESH:D015470 | Air Polluta  | 21.55 | 16  |
| PCDH17   | 27253  | Leukemia, MESH:D015470 | Arsenic Tr   | 21.55 | 21  |
| RAD21    | 5885   | Leukemia, MESH:D015470 | Arsenic Tr   | 21.55 | 21  |

|         |        |                        |               |       |     |
|---------|--------|------------------------|---------------|-------|-----|
| RPTOR   | 57521  | Leukemia, MESH:D015470 | Dexameth      | 21.55 | 11  |
| RSRP1   | 57035  | Leukemia, MESH:D015473 | Arsenic Ar    | 21.55 | 267 |
| SHMT1   | 6470   | Leukemia, MESH:D015473 | Arsenic Ar    | 21.55 | 264 |
| SIVA1   | 10572  | Leukemia, MESH:D015470 | Air Polluta   | 21.55 | 13  |
| SLC27A4 | 10999  | Leukemia, MESH:D015470 | Dronabinc     | 21.55 | 12  |
| TRAF4   | 9618   | Leukemia, MESH:D015470 | Arsenic Tr    | 21.55 | 20  |
| WNK1    | 65125  | Leukemia, MESH:D015470 | Dexameth      | 21.55 | 18  |
| ENO2    | 2026   | Leukemia, MESH:D015473 | Arsenic ar:   | 21.54 | 160 |
| F2R     | 2149   | Leukemia, MESH:D015473 | Arsenic Ar    | 21.54 | 264 |
| HAPLN1A | 493635 | Leukemia, MESH:D015470 | Dexameth      | 21.54 | 6   |
| MAP2    | 4133   | Leukemia, MESH:D015473 | Arsenic Ar    | 21.54 | 267 |
| TGFB3   | 7043   | Leukemia, MESH:D015473 | Arsenic ar:   | 21.54 | 161 |
| DUT     | 1854   | Leukemia, MESH:D015470 | Calcitriol C  | 21.53 | 13  |
| FOXP1   | 27086  | Leukemia, MESH:D015470 | Dexameth      | 21.53 | 20  |
| HNRNPH1 | 3187   | Leukemia, MESH:D015470 | Arsenic Tr    | 21.53 | 18  |
| RACK1   | 10399  | Leukemia, MESH:D015470 | Decitabine    | 21.53 | 25  |
| TLR1    | 7096   | Leukemia, MESH:D007948 | 2-(2-amin     | 21.53 | 2   |
| ZNF544  | 27300  | Leukemia, MESH:D015470 | Dexameth      | 21.53 | 20  |
| CASP9   | 842    | Leukemia, MESH:D004915 | Daunorub      | 21.52 | 4   |
| HOXC8   | 3224   | Leukemia, MESH:D015470 | Cytarabine    | 21.52 | 77  |
| KANSL3  | 55683  | Leukemia, MESH:D015470 | Dexameth      | 21.52 | 11  |
| NRAP    | 4892   | Leukemia, MESH:D015473 | Daunorub      | 21.52 | 20  |
| NUDT17  | 200035 | Leukemia, MESH:D015470 | Doxorubic     | 21.52 | 12  |
| PPARG   | 5468   | Leukemia, MESH:D007948 | 2-(2-amin     | 21.52 | 4   |
| ALMS1   | 7840   | Leukemia, MESH:D015473 | arsenite Ci   | 21.51 | 158 |
| CEP152  | 22995  | Leukemia, MESH:D015473 | arsenite Ci   | 21.51 | 157 |
| IGIP    | 492311 | Leukemia, MESH:D015470 | Dexameth      | 21.51 | 13  |
| KLK6    | 5653   | Leukemia, MESH:D015473 | Arsenic Ca    | 21.51 | 158 |
| LHX1    | 3975   | Leukemia, MESH:D015473 | arsenite Ci   | 21.51 | 153 |
| RABL2A  | 11159  | Leukemia, MESH:D015470 | Dexameth      | 21.51 | 12  |
| RFWD3   | 55159  | Leukemia, MESH:D015473 | arsenite Ci   | 21.51 | 154 |
| ACADM   | 34     | Leukemia, MESH:D015473 | Calcitriol C  | 21.5  | 156 |
| ASIC2   | 40     | Leukemia, MESH:D015473 | Arsenic ar:   | 21.5  | 157 |
| CMSS1   | 84319  | Leukemia, MESH:D015473 | Arsenic ar:   | 21.5  | 159 |
| FAM171B | 165215 | Leukemia, MESH:D015473 | Arsenic ar:   | 21.5  | 15  |
| ITPRID2 | 6744   | Leukemia, MESH:D015473 | Arsenic Tr    | 21.5  | 263 |
| PDGFRA  | 5156   | Leukemia, MESH:D015473 | Arsenic ar:   | 21.5  | 158 |
| PRKAR1B | 5575   | Leukemia, MESH:D015473 | Arsenic Ar    | 21.5  | 263 |
| ALDH1L2 | 160428 | Leukemia, MESH:D015473 | Arsenic ar:   | 21.49 | 160 |
| EPHA4   | 2043   | Leukemia, MESH:D015473 | Arsenic ar:   | 21.49 | 160 |
| MTHFD1L | 25902  | Leukemia, MESH:D015473 | Arsenic Ar    | 21.49 | 264 |
| TAC1    | 6863   | Leukemia, MESH:D015470 | Benzene C     | 21.48 | 98  |
| ABHD14A | 25864  | Leukemia, MESH:D015470 | Air Polluta   | 21.47 | 13  |
| FAXDC2  | 10826  | Leukemia, MESH:D015470 | Air Polluta   | 21.47 | 20  |
| H2AC18  | 8337   | Leukemia, MESH:D015470 | Benzene C     | 21.47 | 36  |
| KMT2B   | 9757   | Leukemia, MESH:D015470 | Benzene C     | 21.47 | 36  |
| MELTF   | 4241   | Leukemia, MESH:D015470 | Benzene C     | 21.47 | 28  |
| MRPS17  | 51373  | Leukemia, MESH:D015470 | Dexameth      | 21.47 | 12  |
| MRPS18A | 55168  | Leukemia, MESH:D015470 | Decitabine    | 21.47 | 21  |
| PDCL3   | 79031  | Leukemia, MESH:D015470 | Arsenic Tr    | 21.47 | 28  |
| PLEKHM1 | 9842   | Leukemia, MESH:D015470 | Benzene C     | 21.47 | 23  |
| SASS6   | 163786 | Leukemia, MESH:D015470 | Calcitriol li | 21.47 | 9   |
| TPPP    | 11076  | Leukemia, MESH:D015470 | Doxorubic     | 21.47 | 13  |
| C1QTNF5 | 114902 | Leukemia, MESH:D015470 | Dexameth      | 21.46 | 14  |
| CENPI   | 2491   | Leukemia, MESH:D015470 | Calcitriol C  | 21.46 | 15  |
| CHAC1   | 79094  | Leukemia, MESH:D015473 | Arsenic Ar    | 21.46 | 162 |
| CTSA    | 5476   | Leukemia, MESH:D015470 | Arsenic Tr    | 21.46 | 21  |
| DPYSL2  | 1808   | Leukemia, MESH:D015470 | Arsenic Tr    | 21.46 | 30  |

|          |        |                        |              |       |     |
|----------|--------|------------------------|--------------|-------|-----|
| EIF2AK2  | 5610   | Leukemia, MESH:D015470 | Arsenic Tr   | 21.46 | 29  |
| GPAT3    | 84803  | Leukemia, MESH:D015470 | Air Polluta  | 21.46 | 13  |
| GPX8     | 493869 | Leukemia, MESH:D015470 | Calcitriol[C | 21.46 | 12  |
| HES5     | 388585 | Leukemia, MESH:D015470 | 2-(2-chlor   | 21.46 | 82  |
| HS3ST1   | 9957   | Leukemia, MESH:D015470 | Cytarabine   | 21.46 | 88  |
| KCNJ11   | 3767   | Leukemia, MESH:D015470 | Dexameth     | 21.46 | 15  |
| MED14    | 9282   | Leukemia, MESH:D015470 | Calcitriol[C | 21.46 | 14  |
| NDUFB8   | 4714   | Leukemia, MESH:D015470 | Deferoxan    | 21.46 | 14  |
| NRIP3    | 56675  | Leukemia, MESH:D015470 | Arsenic Tr   | 21.46 | 96  |
| PHC2     | 1912   | Leukemia, MESH:D015470 | Dexameth     | 21.46 | 13  |
| PLA2G15  | 23659  | Leukemia, MESH:D015470 | Dexameth     | 21.46 | 13  |
| PPP2R5C  | 5527   | Leukemia, MESH:D015470 | Air Polluta  | 21.46 | 16  |
| RDH11    | 51109  | Leukemia, MESH:D015470 | Bortezomi    | 21.46 | 16  |
| SDS      | 10993  | Leukemia, MESH:D015470 | Benzene[C    | 21.46 | 28  |
| THBS4    | 7060   | Leukemia, MESH:D015470 | Decitabine   | 21.46 | 32  |
| TNFSF14  | 8740   | Leukemia, MESH:D015470 | Arsenic Tr   | 21.46 | 38  |
| WHAMM    | 123720 | Leukemia, MESH:D015470 | Air Polluta  | 21.46 | 14  |
| ADORA2A  | 135    | Leukemia, MESH:D015470 | Bezafibrat   | 21.45 | 23  |
| ANK1     | 286    | Leukemia, MESH:D015470 | Calcitriol[C | 21.45 | 23  |
| ARG2     | 384    | Leukemia, MESH:D015470 | Cytarabine   | 21.45 | 87  |
| ATP6V0D1 | 9114   | Leukemia, MESH:D015470 | Arsenic Tr   | 21.45 | 20  |
| COX6B1   | 1340   | Leukemia, MESH:D015470 | Dexameth     | 21.45 | 18  |
| CYP17A1  | 1586   | Leukemia, MESH:D015473 | Arsenic[Ar   | 21.45 | 265 |
| EEF1B2   | 1933   | Leukemia, MESH:D015470 | Arsenic Tr   | 21.45 | 20  |
| EFHD2    | 79180  | Leukemia, MESH:D015470 | Dexameth     | 21.45 | 17  |
| FLI1     | 2313   | Leukemia, MESH:D015470 | Dexameth     | 21.45 | 15  |
| FRMD4A   | 55691  | Leukemia, MESH:D015470 | Dexameth     | 21.45 | 15  |
| HLA-DRB1 | 3127   | Leukemia, MESH:D015473 | Arsenic[Cy   | 21.45 | 24  |
| MPDZ     | 8777   | Leukemia, MESH:D015470 | Dexameth     | 21.45 | 15  |
| PLXNC1   | 10154  | Leukemia, MESH:D015470 | Arsenic Tr   | 21.45 | 16  |
| BSCL2    | 26580  | Leukemia, MESH:D004915 | Cytarabine   | 21.44 | 3   |
| POMC     | 5443   | Leukemia, MESH:D015470 | Bezafibrat   | 21.44 | 20  |
| COL6A2   | 1292   | Leukemia, MESH:D015473 | arsenite[C   | 21.43 | 160 |
| RFC4     | 5984   | Leukemia, MESH:D015473 | Calcitriol[C | 21.43 | 156 |
| TNFRSF25 | 8718   | Leukemia, MESH:D015473 | Arsenic[Ar   | 21.43 | 264 |
| AGPS     | 8540   | Leukemia, MESH:D015473 | Arsenic Tr   | 21.42 | 263 |
| MARCHF3  | 115123 | Leukemia, MESH:D015473 | Arsenic Tr   | 21.42 | 163 |
| ABHD11   | 83451  | Leukemia, MESH:D015473 | Dexameth     | 21.41 | 156 |
| BID      | 637    | Leukemia, MESH:D007948 | Arsenic Tr   | 21.41 | 4   |
| INS2     | 16334  | Leukemia, MESH:D015473 | Arsenic[Ar   | 21.41 | 159 |
| MICB     | 4277   | Leukemia, MESH:D015473 | Arsenic[Ar   | 21.41 | 264 |
| SURF1    | 6834   | Leukemia, MESH:D015473 | arsenite[D   | 21.41 | 161 |
| TMEM38B  | 55151  | Leukemia, MESH:D015473 | Arsenic[ar:  | 21.41 | 158 |
| TP73     | 7161   | Leukemia, MESH:D007948 | 2-(2-amin    | 21.41 | 3   |
| RPS29    | 6235   | Leukemia, MESH:D015473 | Arsenic[Ar   | 21.4  | 265 |
| SERPINB4 | 6318   | Leukemia, MESH:D015473 | Arsenic[ar:  | 21.4  | 156 |
| LTF      | 4057   | Leukemia, MESH:D015470 | Calcitriol[C | 21.39 | 15  |
| CKS1B    | 1163   | Leukemia, MESH:D015473 | arsenite[Ci  | 21.38 | 156 |
| NCAPH    | 23397  | Leukemia, MESH:D015473 | Arsenic Tr   | 21.38 | 262 |
| SCD1     | 20249  | Leukemia, MESH:D015473 | Arsenic Tr   | 21.38 | 261 |
| CDCA2    | 157313 | Leukemia, MESH:D015473 | arsenite[Ci  | 21.37 | 158 |
| CIITA    | 4261   | Leukemia, MESH:D015470 | Alitretnoi   | 21.37 | 23  |
| COX2     | 4513   | Leukemia, MESH:D015473 | Arsenic[ar:  | 21.37 | 160 |
| EFNB2    | 1948   | Leukemia, MESH:D015473 | Arsenic[ar:  | 21.37 | 160 |
| GRPEL1   | 80273  | Leukemia, MESH:D015470 | Doxorubic    | 21.37 | 22  |
| NIBAN1   | 116496 | Leukemia, MESH:D015473 | Arsenic Tr   | 21.37 | 261 |
| RRP12    | 23223  | Leukemia, MESH:D015470 | Decitabine   | 21.37 | 19  |
| ANO1     | 55107  | Leukemia, MESH:D015470 | Dexameth     | 21.36 | 16  |

|          |        |                        |              |       |     |
|----------|--------|------------------------|--------------|-------|-----|
| B4GALT5  | 9334   | Leukemia, MESH:D015470 | Arsenic Tr   | 21.36 | 20  |
| DHX58    | 79132  | Leukemia, MESH:D015470 | Dexameth     | 21.36 | 15  |
| DNM2     | 1785   | Leukemia, MESH:D015470 | Arsenic Tr   | 21.36 | 22  |
| ENDOD1   | 23052  | Leukemia, MESH:D015470 | Dexameth     | 21.36 | 15  |
| EPB41L5  | 57669  | Leukemia, MESH:D015470 | EthylNitros  | 21.36 | 12  |
| FAM107B  | 83641  | Leukemia, MESH:D015470 | Arsenic Tr   | 21.36 | 18  |
| FRAS1    | 80144  | Leukemia, MESH:D015470 | Calcitriol C | 21.36 | 10  |
| LPAR6    | 10161  | Leukemia, MESH:D015470 | Air Polluta  | 21.36 | 15  |
| LPGAT1   | 9926   | Leukemia, MESH:D015470 | Calcitriol C | 21.36 | 12  |
| MUC2     | 4583   | Leukemia, MESH:D015470 | Dronabinc    | 21.36 | 13  |
| NDUFV2   | 4729   | Leukemia, MESH:D015470 | Benzene C    | 21.36 | 29  |
| NRGN     | 4900   | Leukemia, MESH:D015470 | Air Polluta  | 21.36 | 10  |
| PAPOLA   | 10914  | Leukemia, MESH:D015470 | Bortezomi    | 21.36 | 13  |
| PRXL2A   | 84293  | Leukemia, MESH:D015470 | Dexameth     | 21.36 | 15  |
| SMOC2    | 64094  | Leukemia, MESH:D015470 | Cytarabine   | 21.36 | 85  |
| SPTLC2   | 9517   | Leukemia, MESH:D015470 | Arsenic Tr   | 21.36 | 17  |
| STEAP3   | 55240  | Leukemia, MESH:D015470 | Calcitriol C | 21.36 | 10  |
| TFAP2C   | 7022   | Leukemia, MESH:D015470 | Arsenic Tr   | 21.36 | 24  |
| VAMP8    | 8673   | Leukemia, MESH:D015470 | Benzene C    | 21.36 | 30  |
| APP      | 351    | Leukemia, MESH:D015473 | alpha-Toc    | 21.35 | 265 |
| MIR150   | 406942 | Leukemia, MESH:D015470 | Air Polluta  | 21.34 | 32  |
| NUDT12   | 83594  | Leukemia, MESH:D015470 | Arsenic Tr   | 21.34 | 17  |
| STAR     | 6770   | Leukemia, MESH:D007948 | 2-(2-amin    | 21.34 | 3   |
| TDGF1    | 6997   | Leukemia, MESH:D015470 | Bortezomi    | 21.34 | 10  |
| TLR21    | 402884 | Leukemia, MESH:D007948 | 2-(2-amin    | 21.34 | 1   |
| XPNPEP3  | 63929  | Leukemia, MESH:D015470 | Bortezomi    | 21.34 | 18  |
| ANGPTL1  | 9068   | Leukemia, MESH:D015470 | Arsenic Tr   | 21.33 | 20  |
| ARL8A    | 127829 | Leukemia, MESH:D015470 | Bortezomi    | 21.33 | 16  |
| CNPY2    | 10330  | Leukemia, MESH:D015470 | Doxorubic    | 21.33 | 14  |
| CSTF1    | 1477   | Leukemia, MESH:D015470 | Dexameth     | 21.33 | 17  |
| EGF      | 1950   | Leukemia, MESH:D007948 | 2-(2-amin    | 21.33 | 3   |
| GNPTAB   | 79158  | Leukemia, MESH:D015470 | Dexameth     | 21.33 | 13  |
| HAND2    | 9464   | Leukemia, MESH:D015473 | arsenite C   | 21.33 | 159 |
| HSPBP1   | 23640  | Leukemia, MESH:D015470 | Dexameth     | 21.33 | 13  |
| KCNJ13   | 3769   | Leukemia, MESH:D015470 | Decitabine   | 21.33 | 20  |
| KCTD10   | 83892  | Leukemia, MESH:D015470 | Bortezomi    | 21.33 | 16  |
| MED20    | 9477   | Leukemia, MESH:D015470 | Air Polluta  | 21.33 | 13  |
| MIB1     | 57534  | Leukemia, MESH:D015470 | Calcitriol C | 21.33 | 14  |
| NADK     | 65220  | Leukemia, MESH:D015470 | Air Polluta  | 21.33 | 15  |
| NDRG3    | 57446  | Leukemia, MESH:D015470 | Air Polluta  | 21.33 | 16  |
| NSD3     | 54904  | Leukemia, MESH:D015470 | Arsenic Tr   | 21.33 | 16  |
| PTPMT1   | 114971 | Leukemia, MESH:D015470 | Dexameth     | 21.33 | 15  |
| RAI2     | 10742  | Leukemia, MESH:D015470 | Calcitriol C | 21.33 | 14  |
| RNF114   | 55905  | Leukemia, MESH:D015470 | Dexameth     | 21.33 | 15  |
| RTTN     | 25914  | Leukemia, MESH:D015470 | Calcitriol C | 21.33 | 14  |
| SERTAD3  | 29946  | Leukemia, MESH:D015470 | Dexameth     | 21.33 | 12  |
| TMED4    | 222068 | Leukemia, MESH:D015470 | Dexameth     | 21.33 | 14  |
| TOMM7    | 54543  | Leukemia, MESH:D015470 | Arsenic Tr   | 21.33 | 21  |
| TRIM26   | 7726   | Leukemia, MESH:D015470 | Arsenic Tr   | 21.33 | 16  |
| ADRA2A   | 150    | Leukemia, MESH:D015470 | Arsenic Tr   | 21.32 | 22  |
| ATP2B4   | 493    | Leukemia, MESH:D015473 | Arsenic ars  | 21.32 | 158 |
| FOXP3    | 50943  | Leukemia, MESH:D015473 | Arsenic Ar   | 21.32 | 164 |
| HSP90AA1 | 3320   | Leukemia, MESH:D015473 | Arsenic Ar   | 21.32 | 163 |
| KAT5     | 10524  | Leukemia, MESH:D015473 | Arsenic Tr   | 21.32 | 265 |
| PNPLA2   | 57104  | Leukemia, MESH:D015470 | Dexameth     | 21.32 | 17  |
| RAD51AP1 | 10635  | Leukemia, MESH:D015470 | Calcitriol C | 21.32 | 18  |
| SCHIP1   | 29970  | Leukemia, MESH:D015473 | Arsenic De   | 21.32 | 158 |
| SMPD3    | 55512  | Leukemia, MESH:D015470 | Arsenic Tr   | 21.32 | 50  |



|          |        |                        |              |       |     |
|----------|--------|------------------------|--------------|-------|-----|
| UBE2T    | 29089  | Leukemia, MESH:D015473 | Calcitriol[C | 21.32 | 156 |
| VPS13D   | 55187  | Leukemia, MESH:D015473 | Arsenic[ar   | 21.32 | 156 |
| GPR37    | 2861   | Leukemia, MESH:D015473 | Arsenic Tr   | 21.31 | 262 |
| HLA-C    | 3107   | Leukemia, MESH:D015473 | Arsenic[Ar   | 21.31 | 267 |
| NKD2     | 85409  | Leukemia, MESH:D015473 | Arsenic[Ar   | 21.31 | 262 |
| RMI2     | 116028 | Leukemia, MESH:D015473 | Arsenic Tr   | 21.31 | 262 |
| SKA2     | 348235 | Leukemia, MESH:D015473 | arsenite[Ci  | 21.31 | 156 |
| ADGRE2   | 30817  | Leukemia, MESH:D015470 | Air Polluta  | 21.3  | 10  |
| CDK5     | 1020   | Leukemia, MESH:D007948 | 2-(2-amin    | 21.3  | 3   |
| NABP2    | 79035  | Leukemia, MESH:D015470 | Dexameth     | 21.3  | 15  |
| SIMC1    | 375484 | Leukemia, MESH:D015470 | Doxorubic    | 21.3  | 14  |
| UGT1A6   | 54578  | Leukemia, MESH:D015470 | Alitretinoi  | 21.3  | 36  |
| ZNF598   | 90850  | Leukemia, MESH:D015470 | Dexameth     | 21.3  | 11  |
| ZNF606   | 80095  | Leukemia, MESH:D015470 | Doxorubic    | 21.3  | 13  |
| ZSWIM3   | 140831 | Leukemia, MESH:D015470 | Dexameth     | 21.3  | 12  |
| ZSWIM8   | 23053  | Leukemia, MESH:D015470 | Dexameth     | 21.3  | 14  |
| AKT1     | 207    | Leukemia, MESH:D004915 | Daunorub     | 21.29 | 4   |
| CYP17A1  | 1586   | Leukemia, MESH:D007948 | 2-(2-amin    | 21.29 | 3   |
| FMO1     | 2326   | Leukemia, MESH:D015470 | Cytarabine   | 21.29 | 83  |
| UCP2     | 7351   | Leukemia, MESH:D015473 | Arsenic Tr   | 21.29 | 263 |
| ABL2     | 27     | Leukemia, MESH:D015470 | Dasatinib[   | 21.28 | 14  |
| AMH      | 268    | Leukemia, MESH:D015470 | Decitabine   | 21.28 | 21  |
| HTT      | 3064   | Leukemia, MESH:D015470 | Dexameth     | 21.28 | 9   |
| IVL      | 3713   | Leukemia, MESH:D015470 | Alitretinoi  | 21.28 | 18  |
| JAM2     | 58494  | Leukemia, MESH:D015470 | Arsenic Tr   | 21.28 | 90  |
| NFATC3   | 4775   | Leukemia, MESH:D015470 | Arsenic Tr   | 21.28 | 38  |
| PIDD1    | 55367  | Leukemia, MESH:D015470 | Calcitriol[H | 21.28 | 14  |
| ARHGEF3  | 50650  | Leukemia, MESH:D015470 | Air Polluta  | 21.27 | 82  |
| CNN2     | 1265   | Leukemia, MESH:D015470 | Calcitriol[C | 21.27 | 15  |
| DPYSL4   | 10570  | Leukemia, MESH:D015470 | Cyclophos    | 21.27 | 22  |
| IFNGR2   | 3460   | Leukemia, MESH:D015470 | Arsenic Tr   | 21.27 | 34  |
| NEXN     | 91624  | Leukemia, MESH:D015470 | Calcitriol[C | 21.27 | 16  |
| PIM3     | 415116 | Leukemia, MESH:D015470 | Air Polluta  | 21.27 | 16  |
| RNASEH2, | 10535  | Leukemia, MESH:D015470 | Arsenic Tr   | 21.27 | 18  |
| TFDP2    | 7029   | Leukemia, MESH:D015470 | Air Polluta  | 21.27 | 15  |
| TYRP1    | 7306   | Leukemia, MESH:D015470 | Doxorubic    | 21.27 | 24  |
| ZWILCH   | 55055  | Leukemia, MESH:D015470 | Calcitriol[C | 21.27 | 13  |
| ASF1B    | 55723  | Leukemia, MESH:D015473 | arsenite[Ci  | 21.26 | 157 |
| ATP2B1   | 490    | Leukemia, MESH:D015470 | Arsenic Tr   | 21.26 | 18  |
| CRY1     | 1407   | Leukemia, MESH:D015470 | Air Polluta  | 21.26 | 26  |
| GPD2     | 2820   | Leukemia, MESH:D015473 | Arsenic[Ar   | 21.26 | 163 |
| GTSE1    | 51512  | Leukemia, MESH:D015473 | Arsenic[Ca   | 21.26 | 159 |
| HNRNPD   | 3184   | Leukemia, MESH:D015473 | Daunorub     | 21.26 | 161 |
| RETN     | 56729  | Leukemia, MESH:D015470 | Alitretinoi  | 21.26 | 22  |
| SAA1     | 6288   | Leukemia, MESH:D015473 | Arsenic[Ca   | 21.26 | 159 |
| TUBA1C   | 84790  | Leukemia, MESH:D015470 | Dexameth     | 21.26 | 20  |
| GPX2     | 2877   | Leukemia, MESH:D015470 | Alitretinoi  | 21.25 | 19  |
| IGH      | 3492   | Leukemia, MESH:D015473 | Arsenic[De   | 21.25 | 153 |
| DSN1     | 79980  | Leukemia, MESH:D015473 | arsenite[D   | 21.23 | 156 |
| HPRT1    | 3251   | Leukemia, MESH:D015473 | arsenite[Ci  | 21.23 | 157 |
| IKZF2    | 22807  | Leukemia, MESH:D015473 | Antimony     | 21.23 | 154 |
| LCP2     | 3937   | Leukemia, MESH:D015473 | Genistein[   | 21.23 | 157 |
| SBSPON   | 157869 | Leukemia, MESH:D015473 | Cytarabine   | 21.23 | 154 |
| SLC25A11 | 8402   | Leukemia, MESH:D015473 | arsenite[M   | 21.23 | 159 |
| WNT2B    | 7482   | Leukemia, MESH:D015473 | Arsenic[ar   | 21.23 | 156 |
| BTN3A3   | 10384  | Leukemia, MESH:D015473 | Arsenic[Ar   | 21.22 | 264 |
| ISOC1    | 51015  | Leukemia, MESH:D015473 | Arsenic[De   | 21.22 | 158 |
| LMOD1    | 25802  | Leukemia, MESH:D015473 | Arsenic Tr   | 21.22 | 260 |

|         |        |                        |              |       |     |
|---------|--------|------------------------|--------------|-------|-----|
| PPP2R5A | 5525   | Leukemia, MESH:D015473 | Arsenic Tr   | 21.22 | 262 |
| SLC6A14 | 11254  | Leukemia, MESH:D015473 | Arsenic De   | 21.22 | 12  |
| TTF2    | 8458   | Leukemia, MESH:D015473 | Dexameth     | 21.22 | 155 |
| CYP4F3  | 4051   | Leukemia, MESH:D015470 | Benzene M    | 21.21 | 27  |
| HIKESHI | 51501  | Leukemia, MESH:D015470 | Bortezomi    | 21.21 | 15  |
| IFI44   | 10561  | Leukemia, MESH:D015473 | arsenite Cl  | 21.21 | 154 |
| MYT1    | 4661   | Leukemia, MESH:D015470 | Dexameth     | 21.21 | 22  |
| PACSIN1 | 29993  | Leukemia, MESH:D015470 | Bortezomi    | 21.21 | 13  |
| POLE2   | 5427   | Leukemia, MESH:D015473 | arsenite Ci  | 21.21 | 157 |
| SORT1   | 6272   | Leukemia, MESH:D015473 | Cholesterc   | 21.21 | 152 |
| TRIM32  | 22954  | Leukemia, MESH:D015470 | Air Polluta  | 21.21 | 8   |
| AATK    | 9625   | Leukemia, MESH:D015470 | Dexameth     | 21.2  | 16  |
| ACOT11  | 26027  | Leukemia, MESH:D015470 | Calcitriol L | 21.2  | 15  |
| ALYREF  | 10189  | Leukemia, MESH:D015470 | Cyclophos    | 21.2  | 11  |
| CDKL5   | 6792   | Leukemia, MESH:D015470 | Doxorubic    | 21.2  | 15  |
| CEP290  | 80184  | Leukemia, MESH:D015470 | Bortezomi    | 21.2  | 10  |
| DCAF7   | 10238  | Leukemia, MESH:D015470 | Air Polluta  | 21.2  | 9   |
| H2AC20  | 8338   | Leukemia, MESH:D015470 | Arsenic Tr   | 21.2  | 20  |
| HPS3    | 84343  | Leukemia, MESH:D015470 | Air Polluta  | 21.2  | 19  |
| ILDR2   | 387597 | Leukemia, MESH:D015470 | Doxorubic    | 21.2  | 19  |
| MARK1   | 4139   | Leukemia, MESH:D015470 | Alitretinoi  | 21.2  | 19  |
| MPHOSP+ | 10198  | Leukemia, MESH:D015470 | Air Polluta  | 21.2  | 15  |
| MRPL24  | 79590  | Leukemia, MESH:D015470 | Arsenic Tr   | 21.2  | 16  |
| MTA3    | 57504  | Leukemia, MESH:D015470 | Dronabinc    | 21.2  | 12  |
| NINJ2   | 4815   | Leukemia, MESH:D015470 | Arsenic Tr   | 21.2  | 14  |
| PAICS   | 10606  | Leukemia, MESH:D015473 | Arsenic Ar   | 21.2  | 264 |
| PAQR5   | 54852  | Leukemia, MESH:D015470 | Calcitriol L | 21.2  | 14  |
| PIK3R3  | 8503   | Leukemia, MESH:D015473 | Arsenic ar:  | 21.2  | 160 |
| PPM1E   | 22843  | Leukemia, MESH:D015470 | Dexameth     | 21.2  | 11  |
| PWP2    | 5822   | Leukemia, MESH:D015470 | Dronabinc    | 21.2  | 11  |
| RNF115  | 27246  | Leukemia, MESH:D015470 | Dexameth     | 21.2  | 14  |
| SEPSECS | 51091  | Leukemia, MESH:D015470 | Arsenic Tr   | 21.2  | 15  |
| THEM4   | 117145 | Leukemia, MESH:D015470 | Doxorubic    | 21.2  | 14  |
| TMEM177 | 80775  | Leukemia, MESH:D015470 | Arsenic Tr   | 21.2  | 18  |
| TSHZ2   | 128553 | Leukemia, MESH:D015470 | Dexameth     | 21.2  | 16  |
| WASF3   | 10810  | Leukemia, MESH:D015470 | Benzene C    | 21.2  | 28  |
| WBP1    | 23559  | Leukemia, MESH:D015470 | Dexameth     | 21.2  | 9   |
| YTHDF2  | 51441  | Leukemia, MESH:D015470 | Arsenic Tr   | 21.2  | 17  |
| ZFYVE1  | 53349  | Leukemia, MESH:D015470 | Dexameth     | 21.2  | 15  |
| AGL     | 178    | Leukemia, MESH:D015470 | Air Polluta  | 21.19 | 20  |
| ATR     | 545    | Leukemia, MESH:D015470 | Arsenic Tr   | 21.19 | 38  |
| GLDC    | 2731   | Leukemia, MESH:D015470 | Decitabine   | 21.19 | 25  |
| MAGI1   | 9223   | Leukemia, MESH:D015470 | Calcitriol C | 21.19 | 82  |
| NOG     | 9241   | Leukemia, MESH:D015470 | Decitabine   | 21.19 | 18  |
| PARK7   | 11315  | Leukemia, MESH:D015470 | 15-deoxy-    | 21.19 | 28  |
| PNISR   | 25957  | Leukemia, MESH:D015470 | Bortezomi    | 21.19 | 19  |
| RBPJ    | 3516   | Leukemia, MESH:D015470 | Benzene C    | 21.19 | 32  |
| REL     | 5966   | Leukemia, MESH:D015470 | Arsenic Tr   | 21.19 | 25  |
| SGO1    | 151648 | Leukemia, MESH:D015470 | Calcitriol L | 21.19 | 13  |
| SLC1A2  | 6506   | Leukemia, MESH:D015473 | alpha-Toc    | 21.19 | 263 |
| SMPDL3A | 10924  | Leukemia, MESH:D015470 | Arsenic Tr   | 21.19 | 84  |
| TTC3    | 7267   | Leukemia, MESH:D015470 | Decitabine   | 21.19 | 24  |
| YPEL2   | 388403 | Leukemia, MESH:D015470 | Air Polluta  | 21.19 | 18  |
| ZFHx3   | 463    | Leukemia, MESH:D015470 | Doxorubic    | 21.18 | 16  |
| MAGEA6  | 4105   | Leukemia, MESH:D015470 | Decitabine   | 21.16 | 32  |
| CSRP2   | 1466   | Leukemia, MESH:D015473 | Arsenic Ar   | 21.15 | 265 |
| IFITM3  | 10410  | Leukemia, MESH:D015473 | Arsenic Tr   | 21.15 | 261 |
| KCNMA1  | 3778   | Leukemia, MESH:D015473 | Arsenic Ar   | 21.15 | 263 |

|          |        |                        |              |       |     |
|----------|--------|------------------------|--------------|-------|-----|
| TCF19    | 6941   | Leukemia, MESH:D015473 | Arsenic Tr   | 21.15 | 157 |
| TUBB     | 203068 | Leukemia, MESH:D015473 | Arsenic Ar   | 21.15 | 14  |
| CEBPZ    | 10153  | Leukemia, MESH:D015473 | Arsenic Tr   | 21.14 | 262 |
| TM6SF1   | 53346  | Leukemia, MESH:D015473 | Arsenic Ar   | 21.14 | 159 |
| ART3     | 419    | Leukemia, MESH:D015473 | Arsenic De   | 21.13 | 156 |
| DMKN     | 93099  | Leukemia, MESH:D015473 | Arsenic Ca   | 21.13 | 12  |
| ID4      | 3400   | Leukemia, MESH:D015470 | Arsenic Tr   | 21.13 | 44  |
| NUP37    | 79023  | Leukemia, MESH:D015473 | Arsenic Tr   | 21.13 | 263 |
| OSBPL8   | 114882 | Leukemia, MESH:D015473 | Arsenic Ar   | 21.13 | 263 |
| RNASEH2I | 79621  | Leukemia, MESH:D015473 | Arsenic Ca   | 21.13 | 157 |
| TACC3    | 10460  | Leukemia, MESH:D015470 | Calcitriol C | 21.13 | 14  |
| TBC1D5   | 9779   | Leukemia, MESH:D015473 | arsenite D   | 21.13 | 161 |
| TCEA2    | 6919   | Leukemia, MESH:D015473 | Arsenic Ca   | 21.13 | 11  |
| ABCB1B   | 18669  | Leukemia, MESH:D015473 | Dexameth     | 21.12 | 156 |
| OR52K3P  | 390035 | Leukemia, MESH:D015470 | Air Polluta  | 21.12 | 12  |
| MZT2A    | 653784 | Leukemia, MESH:D015470 | Doxorubic    | 21.11 | 11  |
| ALOX5AP  | 241    | Leukemia, MESH:D015473 | Arsenic Tr   | 21.1  | 266 |
| C6ORF62  | 81688  | Leukemia, MESH:D015470 | Azacitidine  | 21.1  | 15  |
| CAVIN1   | 284119 | Leukemia, MESH:D015470 | Benzene C    | 21.1  | 95  |
| CPD      | 1362   | Leukemia, MESH:D015470 | Calcitriol C | 21.1  | 16  |
| DBT      | 1629   | Leukemia, MESH:D015470 | Arsenic Tr   | 21.1  | 22  |
| MAP2K5   | 5607   | Leukemia, MESH:D015470 | Azacitidine  | 21.1  | 14  |
| REEP5    | 7905   | Leukemia, MESH:D015470 | Dexameth     | 21.1  | 12  |
| RRM2B    | 50484  | Leukemia, MESH:D015473 | Arsenic Ar   | 21.1  | 15  |
| SEMA3B   | 7869   | Leukemia, MESH:D015470 | Calcitriol C | 21.1  | 14  |
| SLC41A2  | 84102  | Leukemia, MESH:D015470 | Calcitriol C | 21.1  | 16  |
| ST13     | 6767   | Leukemia, MESH:D015470 | Arsenic Tr   | 21.1  | 21  |
| STK39    | 27347  | Leukemia, MESH:D015470 | Calcitriol C | 21.1  | 17  |
| STMN2    | 11075  | Leukemia, MESH:D015470 | Decitabine   | 21.1  | 23  |
| TBL1Y    | 90665  | Leukemia, MESH:D015470 | Dexameth     | 21.1  | 8   |
| TNPO1    | 3842   | Leukemia, MESH:D015470 | Calcitriol F | 21.1  | 13  |
| UAP1     | 6675   | Leukemia, MESH:D015470 | Arsenic Tr   | 21.1  | 35  |
| ZNF32    | 7580   | Leukemia, MESH:D015470 | Dexameth     | 21.1  | 19  |
| CD1D     | 912    | Leukemia, MESH:D015470 | Arsenic Tr   | 21.09 | 15  |
| HDAC2    | 3066   | Leukemia, MESH:D015473 | Arsenic Tr   | 21.09 | 263 |
| RNF166   | 115992 | Leukemia, MESH:D015470 | Doxorubic    | 21.09 | 12  |
| TMEM132  | 114795 | Leukemia, MESH:D015470 | Decitabine   | 21.09 | 15  |
| AGO1     | 26523  | Leukemia, MESH:D015470 | Benzene C    | 21.08 | 24  |
| ATP6V0A4 | 50617  | Leukemia, MESH:D015470 | Dronabinc    | 21.08 | 16  |
| ATP6V1F  | 9296   | Leukemia, MESH:D015470 | Doxorubic    | 21.08 | 14  |
| BRINP1   | 1620   | Leukemia, MESH:D015470 | Arsenic Tr   | 21.08 | 20  |
| BTAF1    | 9044   | Leukemia, MESH:D015470 | Dexameth     | 21.08 | 13  |
| CA2      | 760    | Leukemia, MESH:D015473 | Calcitriol C | 21.08 | 157 |
| CD5      | 921    | Leukemia, MESH:D015470 | Benzene B    | 21.08 | 23  |
| CERS1    | 10715  | Leukemia, MESH:D015470 | Dexameth     | 21.08 | 10  |
| CFAP97   | 57587  | Leukemia, MESH:D015470 | Doxorubic    | 21.08 | 13  |
| FOXK2    | 3607   | Leukemia, MESH:D015470 | Doxorubic    | 21.08 | 18  |
| GIPC1    | 10755  | Leukemia, MESH:D015470 | Arsenic Tr   | 21.08 | 16  |
| GTPBP1   | 9567   | Leukemia, MESH:D015470 | Bortezomi    | 21.08 | 88  |
| MMS22L   | 253714 | Leukemia, MESH:D015470 | Calcitriol C | 21.08 | 10  |
| NTPCR    | 84284  | Leukemia, MESH:D015470 | Doxorubic    | 21.08 | 15  |
| NUFIP2   | 57532  | Leukemia, MESH:D015470 | Doxorubic    | 21.08 | 15  |
| PCDH19   | 57526  | Leukemia, MESH:D015470 | Arsenic Tr   | 21.08 | 23  |
| PRRC2B   | 84726  | Leukemia, MESH:D015470 | Dexameth     | 21.08 | 10  |
| PSAT1    | 29968  | Leukemia, MESH:D015473 | Arsenic Tr   | 21.08 | 261 |
| PSKH1    | 5681   | Leukemia, MESH:D015470 | Dexameth     | 21.08 | 12  |
| TEX30    | 93081  | Leukemia, MESH:D015470 | Benzene C    | 21.08 | 24  |
| TSPYL2   | 64061  | Leukemia, MESH:D015470 | Air Polluta  | 21.08 | 19  |

|          |        |                        |              |       |     |
|----------|--------|------------------------|--------------|-------|-----|
| VDAC3    | 7419   | Leukemia, MESH:D015470 | Dexameth     | 21.08 | 16  |
| WASF1    | 8936   | Leukemia, MESH:D015470 | Clioquinol   | 21.08 | 14  |
| ZC3H4    | 23211  | Leukemia, MESH:D015470 | Decitabine   | 21.08 | 15  |
| ZNF287   | 57336  | Leukemia, MESH:D015470 | Dexameth     | 21.08 | 7   |
| ARF5     | 381    | Leukemia, MESH:D015470 | Dexameth     | 21.07 | 14  |
| CNOT4    | 4850   | Leukemia, MESH:D015470 | Dexameth     | 21.07 | 14  |
| EPX      | 8288   | Leukemia, MESH:D015470 | Arsenic Tr   | 21.07 | 16  |
| MBOAT7   | 79143  | Leukemia, MESH:D015470 | Dexameth     | 21.07 | 11  |
| PGGT1B   | 5229   | Leukemia, MESH:D015470 | Arsenic Tr   | 21.07 | 21  |
| PPP1R1C  | 151242 | Leukemia, MESH:D015470 | Calcitriol C | 21.07 | 13  |
| RIN3     | 79890  | Leukemia, MESH:D015470 | Calcitriol C | 21.07 | 11  |
| RTKN2    | 219790 | Leukemia, MESH:D015470 | Calcitriol I | 21.07 | 11  |
| SGTB     | 54557  | Leukemia, MESH:D015470 | Arsenic Tr   | 21.07 | 14  |
| TBC1D9   | 23158  | Leukemia, MESH:D015470 | Bortezomi    | 21.07 | 15  |
| YOD1     | 55432  | Leukemia, MESH:D015470 | Doxorubic    | 21.07 | 13  |
| CCR7     | 1236   | Leukemia, MESH:D015470 | Alitretinoi  | 21.06 | 31  |
| SCARNA2  | 677681 | Leukemia, MESH:D015470 | Doxorubic    | 21.06 | 10  |
| SERPINC1 | 462    | Leukemia, MESH:D015470 | Bezafibrat   | 21.06 | 13  |
| SERPING1 | 710    | Leukemia, MESH:D015470 | Air Polluta  | 21.06 | 17  |
| TRP53    | 22059  | Leukemia, MESH:D007948 | 2-(2-amin    | 21.06 | 4   |
| FUT4     | 2526   | Leukemia, MESH:D015473 | Arsenic Ar   | 21.05 | 268 |
| TAF15    | 8148   | Leukemia, MESH:D015473 | Arsenic Ar   | 21.05 | 267 |
| TERF1    | 7013   | Leukemia, MESH:D015473 | Arsenic Tr   | 21.05 | 261 |
| YWHAE    | 7531   | Leukemia, MESH:D015473 | Arsenic ar:  | 21.05 | 17  |
| ATG4B    | 23192  | Leukemia, MESH:D015473 | Arsenic Ar   | 21.04 | 161 |
| CDK2     | 1017   | Leukemia, MESH:D007948 | 2-(2-amin    | 21.04 | 3   |
| CGA      | 1081   | Leukemia, MESH:D015473 | 2-(2-chlor   | 21.04 | 157 |
| CPE      | 1363   | Leukemia, MESH:D015473 | Arsenic Ar   | 21.04 | 262 |
| LRRK1    | 79705  | Leukemia, MESH:D015473 | Arsenic Ar   | 21.04 | 266 |
| MAX      | 4149   | Leukemia, MESH:D015473 | Arsenic Tr   | 21.04 | 260 |
| NOVA1    | 4857   | Leukemia, MESH:D015473 | Arsenic Tr   | 21.04 | 164 |
| RARB     | 5915   | Leukemia, MESH:D015473 | 2-(2-chlor   | 21.04 | 267 |
| SLC2A5   | 6518   | Leukemia, MESH:D015473 | Arsenic Ar   | 21.04 | 268 |
| ZNF383   | 163087 | Leukemia, MESH:D015473 | Arsenic Tr   | 21.04 | 263 |
| MAPK9    | 5601   | Leukemia, MESH:D007948 | 2-(2-amin    | 21.02 | 3   |
| DYSF     | 8291   | Leukemia, MESH:D015470 | Calcitriol C | 21.01 | 22  |
| EIF3B    | 8662   | Leukemia, MESH:D015470 | Benzene C    | 21.01 | 32  |
| GTPBP2   | 54676  | Leukemia, MESH:D015470 | Decitabine   | 21.01 | 23  |
| ICAM2    | 3384   | Leukemia, MESH:D015470 | Air Polluta  | 21.01 | 17  |
| MEG3     | 55384  | Leukemia, MESH:D015470 | Arsenic Tr   | 21.01 | 26  |
| MIR34A   | 407040 | Leukemia, MESH:D015470 | Benzene C    | 21.01 | 34  |
| NCOA4    | 8031   | Leukemia, MESH:D015470 | Arsenic Tr   | 21.01 | 20  |
| PDP1     | 54704  | Leukemia, MESH:D015470 | Calcitriol C | 21.01 | 10  |
| TFE3     | 7030   | Leukemia, MESH:D015470 | Azaciditine  | 21.01 | 83  |
| TNFRSF11 | 8792   | Leukemia, MESH:D015470 | Arsenic Tr   | 21.01 | 17  |
| TRIM25   | 7706   | Leukemia, MESH:D015470 | Arsenic Tr   | 21.01 | 20  |
| AGTR1    | 185    | Leukemia, MESH:D015470 | Arsenic Tr   | 21    | 30  |
| CASP2    | 835    | Leukemia, MESH:D015473 | Arsenic Ar   | 21    | 166 |
| CFH      | 3075   | Leukemia, MESH:D015470 | Doxorubic    | 21    | 17  |
| CKM      | 1158   | Leukemia, MESH:D015470 | Allopurinc   | 21    | 58  |
| FGF1     | 2246   | Leukemia, MESH:D015473 | Arsenic ar:  | 21    | 265 |
| JUND     | 3727   | Leukemia, MESH:D015473 | alpha-Toc    | 21    | 265 |
| TNC      | 3371   | Leukemia, MESH:D015473 | Arsenic ar:  | 21    | 159 |
| TST      | 7263   | Leukemia, MESH:D015470 | Cytarabine   | 21    | 82  |
| BAMBI    | 25805  | Leukemia, MESH:D015473 | Arsenic Tr   | 20.99 | 263 |
| EIF4G1   | 1981   | Leukemia, MESH:D007948 | 2-(2-amin    | 20.99 | 3   |
| MALAT1   | 378938 | Leukemia, MESH:D015473 | Arsenic Ar   | 20.98 | 266 |
| AURKB    | 9212   | Leukemia, MESH:D015473 | arsenite Ci  | 20.97 | 158 |

|          |        |                            |               |       |     |
|----------|--------|----------------------------|---------------|-------|-----|
| FMO4     | 2329   | Leukemia, MESH:D015473     | Calcitriol[C  | 20.96 | 159 |
| NEO1     | 4756   | Leukemia, MESH:D015473     | Arsenic Tr    | 20.96 | 261 |
| POLR1H   | 30834  | Leukemia, MESH:D015473     | arsenite[Et   | 20.96 | 11  |
| PPP1R13L | 10848  | Leukemia, MESH:D015473     | Arsenic[D     | 20.96 | 160 |
| PSMD13   | 5719   | Leukemia, MESH:D015473     | Arsenic[Ar    | 20.96 | 265 |
| RPS21    | 6227   | Leukemia, MESH:D015473     | Arsenic Tr    | 20.96 | 156 |
| YKT6     | 10652  | Leukemia, MESH:D015473     | Arsenic[Ar    | 20.96 | 267 |
| ARGLU1   | 55082  | Leukemia, MESH:D015470     | Dexameth      | 20.95 | 11  |
| CCDC18   | 343099 | Leukemia, MESH:D015470     | Calcitriol[C  | 20.95 | 15  |
| CDH23    | 64072  | Leukemia, MESH:D015470     | Arsenic Tr    | 20.95 | 20  |
| CNOT6L   | 246175 | Leukemia, MESH:D015470     | Arsenic Tr    | 20.95 | 19  |
| CREB3L4  | 148327 | Leukemia, MESH:D015470     | Azaciditidine | 20.95 | 15  |
| CTNNBIP1 | 56998  | Leukemia, MESH:D015470     | Cyclophos     | 20.95 | 14  |
| DISP1    | 84976  | Leukemia, MESH:D015470     | Calcitriol[C  | 20.95 | 13  |
| EIF5A2   | 56648  | Leukemia, MESH:D015473     | Arsenic[Ar    | 20.95 | 264 |
| FES      | 2242   | Leukemia, MESH:D015470     | Dexameth      | 20.95 | 11  |
| GPBAR1   | 151306 | Leukemia, MESH:D015470     | Air Polluta   | 20.95 | 10  |
| GPX1A    | 352926 | Leukemia, MESH:D015470     | Arsenic Tr    | 20.95 | 17  |
| HDAC10   | 83933  | Leukemia, MESH:D015470     | Bortezomi     | 20.95 | 10  |
| HLA-F    | 3134   | Leukemia, MESH:D015470     | Arsenic Tr    | 20.95 | 16  |
| ITGBL1   | 9358   | Leukemia, MESH:D015470     | Arsenic Tr    | 20.95 | 21  |
| KANSL2   | 54934  | Leukemia, MESH:D015470     | Dexameth      | 20.95 | 13  |
| LDB2     | 9079   | Leukemia, MESH:D015470     | Arsenic Tr    | 20.95 | 20  |
| MOSPD2   | 158747 | Leukemia, MESH:D015470     | Air Polluta   | 20.95 | 20  |
| NDUFA4   | 4697   | Leukemia, MESH:D015473     | Arsenic Tr    | 20.95 | 263 |
| NSMAF    | 8439   | Leukemia, MESH:D015470     | Benzene[C     | 20.95 | 27  |
| PARP3    | 10039  | Leukemia, MESH:D015470     | Dexameth      | 20.95 | 9   |
| PAX5     | 5079   | Leukemia, MESH:D015470     | Arsenic Tr    | 20.95 | 14  |
| PAX7     | 5081   | Leukemia, MESH:D015470     | Dexameth      | 20.95 | 9   |
| PKN2     | 5586   | Leukemia, MESH:D015470     | Dexameth      | 20.95 | 15  |
| PLEKHG4  | 25894  | Leukemia, MESH:D015470     | Decitabine    | 20.95 | 16  |
| PRRG1    | 5638   | Leukemia, MESH:D015470     | Arsenic Tr    | 20.95 | 20  |
| PUM3     | 9933   | Leukemia, MESH:D015470     | Dexameth      | 20.95 | 14  |
| RAVER2   | 55225  | Leukemia, MESH:D015470     | Dasatinib[    | 20.95 | 14  |
| RBFOX3   | 146713 | Leukemia, MESH:D015473     | Arsenic[Ge    | 20.95 | 157 |
| SAP30    | 8819   | Leukemia, MESH:D015470     | Dexameth      | 20.95 | 10  |
| SLC25A32 | 81034  | Leukemia, MESH:D015470     | Dexameth      | 20.95 | 14  |
| SOX10    | 6663   | Leukemia, MESH:D015470     | Bortezomi     | 20.95 | 18  |
| TM7SF3   | 51768  | Leukemia, MESH:D015470     | Dexameth      | 20.95 | 21  |
| TMEM44   | 93109  | Leukemia, MESH:D015470     | Decitabine    | 20.95 | 15  |
| TMEM63A  | 9725   | Leukemia, MESH:D015470     | Dexameth      | 20.95 | 14  |
| TOR1AIP2 | 163590 | Leukemia, MESH:D015470     | Air Polluta   | 20.95 | 8   |
| ZFP91    | 80829  | Leukemia, MESH:D015470     | Dexameth      | 20.95 | 14  |
| ZMYM2    | 7750   | Leukemia, MESH:D015473     | Arsenic Tr    | 20.95 | 263 |
| EZR      | 7430   | Leukemia, MESH:D015470     | Arsenic Tr    | 20.94 | 90  |
| ADGRE1   | 2015   | Leukemia, MESH:D015473     | Arsenic[Ar    | 20.93 | 269 |
| BAG1     | 573    | Leukemia, MESH:D015470     | alvocidib[    | 20.93 | 35  |
| DOCK8    | 81704  | Leukemia, MESH:D015470     | Air Polluta   | 20.93 | 19  |
| HMGCS1   | 3157   | Leukemia, MESH:D015473     | Arsenic Tr    | 20.93 | 268 |
| MYADM    | 91663  | Leukemia, MESH:D015470     | Air Polluta   | 20.93 | 78  |
| NEDD4L   | 23327  | Leukemia, MESH:D015470     | Decitabine    | 20.93 | 23  |
| NUF2     | 83540  | Leukemia, MESH:D015473     | arsenite[Ci   | 20.93 | 158 |
| PSMB9    | 5698   | Leukemia, MESH:D015473     | arsenite[Ci   | 20.93 | 159 |
| RUNX1T1  | 862    | Leukemia, MESH:D01marker/m | Calcitriol[C  | 20.92 | 16  |
| ACSF2    | 80221  | Leukemia, MESH:D015470     | Decitabine    | 20.92 | 20  |
| F8       | 2157   | Leukemia, MESH:D015470     | Arsenic Tr    | 20.92 | 21  |
| GALK1    | 2584   | Leukemia, MESH:D015470     | Arsenic Tr    | 20.92 | 20  |
| GLA      | 2717   | Leukemia, MESH:D015470     | Arsenic Tr    | 20.92 | 21  |

|          |        |                        |              |       |     |
|----------|--------|------------------------|--------------|-------|-----|
| MAP1LC3, | 84557  | Leukemia, MESH:D007948 | 2-(2-amin    | 20.92 | 3   |
| PHEX     | 5251   | Leukemia, MESH:D015470 | Calcitriol C | 20.92 | 10  |
| RAI14    | 26064  | Leukemia, MESH:D015470 | Calcitriol C | 20.92 | 16  |
| TACC2    | 10579  | Leukemia, MESH:D015470 | Dexameth     | 20.92 | 17  |
| APOA1    | 335    | Leukemia, MESH:D015470 | Alitretinoin | 20.91 | 21  |
| ESR2     | 2100   | Leukemia, MESH:D015473 | alpha-Toc    | 20.91 | 268 |
| MIR497   | 574456 | Leukemia, MESH:D015473 | Arsenic Mi   | 20.9  | 12  |
| TRIM68   | 55128  | Leukemia, MESH:D015470 | Decitabine   | 20.9  | 18  |
| ATP1A2   | 477    | Leukemia, MESH:D015473 | Calcitriol C | 20.89 | 158 |
| BMX      | 660    | Leukemia, MESH:D015470 | Dexameth     | 20.89 | 13  |
| CRKL     | 1399   | Leukemia, MESH:D015473 | alvocidib /  | 20.89 | 259 |
| CTSL     | 1514   | Leukemia, MESH:D015473 | Arsenic Tr   | 20.89 | 262 |
| CXCL2    | 2920   | Leukemia, MESH:D007948 | 2-(2-amin    | 20.89 | 3   |
| MSL2     | 55167  | Leukemia, MESH:D015470 | Arsenic Tr   | 20.89 | 34  |
| NP1PA1   | 9284   | Leukemia, MESH:D015470 | Dexameth     | 20.89 | 14  |
| PIGB     | 9488   | Leukemia, MESH:D015470 | Doxorubic    | 20.89 | 16  |
| POLDIP3  | 84271  | Leukemia, MESH:D015470 | Dexameth     | 20.89 | 11  |
| SOD3     | 6649   | Leukemia, MESH:D015470 | Arsenic Tr   | 20.89 | 26  |
| COTL1    | 23406  | Leukemia, MESH:D015473 | Arsenic Tr   | 20.88 | 263 |
| DCAF12   | 25853  | Leukemia, MESH:D015470 | Dexameth     | 20.88 | 13  |
| H3-3A    | 3020   | Leukemia, MESH:D015470 | Dexameth     | 20.88 | 12  |
| JUP      | 3728   | Leukemia, MESH:D015473 | Arsenic Ca   | 20.88 | 159 |
| KIFC1    | 3833   | Leukemia, MESH:D015473 | Arsenic ar:  | 20.88 | 157 |
| LAMB1    | 3912   | Leukemia, MESH:D015473 | Arsenic Da   | 20.88 | 158 |
| MIAT     | 440823 | Leukemia, MESH:D015470 | Calcitriol T | 20.88 | 9   |
| NCOA3    | 8202   | Leukemia, MESH:D015473 | arsenite Ci  | 20.88 | 156 |
| NPPA     | 4878   | Leukemia, MESH:D015473 | 2-(2-chlor   | 20.88 | 164 |
| PGF      | 5228   | Leukemia, MESH:D015473 | Arsenic Ar   | 20.88 | 264 |
| PPP2CA   | 5515   | Leukemia, MESH:D015473 | Arsenic Ar   | 20.88 | 266 |
| SDC2     | 6383   | Leukemia, MESH:D015473 | Arsenic Tr   | 20.88 | 263 |
| TMEM251  | 26175  | Leukemia, MESH:D015470 | Doxorubic    | 20.88 | 13  |
| CYP4B1   | 1580   | Leukemia, MESH:D015470 | Bezafibrat   | 20.87 | 13  |
| DHX15    | 1665   | Leukemia, MESH:D015473 | Arsenic Tr   | 20.87 | 263 |
| GINS3    | 64785  | Leukemia, MESH:D015473 | Arsenic ar:  | 20.87 | 160 |
| HTATIP2  | 10553  | Leukemia, MESH:D015470 | Arsenic Tr   | 20.87 | 24  |
| PARP2    | 10038  | Leukemia, MESH:D015473 | Arsenic Tr   | 20.87 | 157 |
| RERG     | 85004  | Leukemia, MESH:D015473 | Arsenic Tr   | 20.87 | 262 |
| AHCTF1   | 25909  | Leukemia, MESH:D015473 | Arsenic ar:  | 20.86 | 159 |
| EVA1A    | 84141  | Leukemia, MESH:D015473 | Arsenic ar:  | 20.86 | 158 |
| GRIN1    | 2902   | Leukemia, MESH:D015473 | arsenic dis  | 20.86 | 264 |
| NDUFS3   | 4722   | Leukemia, MESH:D015473 | Arsenic De   | 20.86 | 158 |
| SPP1     | 6696   | Leukemia, MESH:D007948 | 2-(2-amin    | 20.86 | 3   |
| TSPAN12  | 23554  | Leukemia, MESH:D015473 | Arsenic ar:  | 20.86 | 13  |
| CDKN1A   | 1026   | Leukemia, MESH:D007948 | 2-(2-amin    | 20.85 | 4   |
| ABHD5    | 51099  | Leukemia, MESH:D015470 | Arsenic Tr   | 20.84 | 28  |
| CORIN    | 10699  | Leukemia, MESH:D015470 | Arsenic Tr   | 20.84 | 54  |
| CSF2RB   | 1439   | Leukemia, MESH:D015470 | Arsenic Tr   | 20.84 | 40  |
| EPAS1    | 2034   | Leukemia, MESH:D015470 | Dasatinib    | 20.84 | 20  |
| GCH1     | 2643   | Leukemia, MESH:D015470 | Decitabine   | 20.84 | 31  |
| JAK3     | 3718   | Leukemia, MESH:D015470 | Arsenic Tr   | 20.84 | 25  |
| LAMA4    | 3910   | Leukemia, MESH:D015470 | Busulfan C   | 20.84 | 18  |
| MAP2K4   | 6416   | Leukemia, MESH:D015473 | alvocidib c  | 20.84 | 157 |
| MEST     | 4232   | Leukemia, MESH:D015470 | Dexameth     | 20.84 | 27  |
| PDE7B    | 27115  | Leukemia, MESH:D015470 | Arsenic Tr   | 20.84 | 38  |
| POLR2A   | 5430   | Leukemia, MESH:D015470 | alvocidib /  | 20.84 | 18  |
| PTPN3    | 5774   | Leukemia, MESH:D015470 | Calcitriol C | 20.84 | 18  |
| SREBF2   | 6721   | Leukemia, MESH:D015470 | Allopurinc   | 20.84 | 20  |
| TRPV2    | 51393  | Leukemia, MESH:D015470 | Cytarabine   | 20.84 | 82  |

|          |        |                        |              |       |     |
|----------|--------|------------------------|--------------|-------|-----|
| TTPA     | 7274   | Leukemia, MESH:D015470 | Dexameth     | 20.84 | 15  |
| WT1      | 7490   | Leukemia, MESH:D015470 | Arsenic Tr   | 20.83 | 263 |
| CBLL1    | 79872  | Leukemia, MESH:D015470 | Calcitriol C | 20.83 | 15  |
| CCDC136  | 64753  | Leukemia, MESH:D015470 | Decitabine   | 20.83 | 15  |
| CEACAM6  | 4680   | Leukemia, MESH:D015470 | Calcitriol C | 20.83 | 19  |
| CENPL    | 91687  | Leukemia, MESH:D015470 | Calcitriol C | 20.83 | 11  |
| CPVL     | 54504  | Leukemia, MESH:D015470 | Doxorubic    | 20.83 | 22  |
| CRTC2    | 200186 | Leukemia, MESH:D015470 | Dexameth     | 20.83 | 17  |
| ENPP1    | 5167   | Leukemia, MESH:D015473 | Dasatinib I  | 20.83 | 155 |
| FKBP8    | 23770  | Leukemia, MESH:D015470 | Doxorubic    | 20.83 | 16  |
| FNDC3A   | 22862  | Leukemia, MESH:D015470 | Decitabine   | 20.83 | 29  |
| FREM1    | 158326 | Leukemia, MESH:D015470 | Calcitriol C | 20.83 | 14  |
| GNL2     | 29889  | Leukemia, MESH:D015470 | Air Polluta  | 20.83 | 11  |
| HOXA2    | 3199   | Leukemia, MESH:D015470 | Arsenic Tr   | 20.83 | 82  |
| LAPTM4B  | 55353  | Leukemia, MESH:D015470 | Decitabine   | 20.83 | 21  |
| LCOR     | 84458  | Leukemia, MESH:D015470 | (+)-JQ1 c    | 20.83 | 14  |
| LTV1     | 84946  | Leukemia, MESH:D015470 | Dexameth     | 20.83 | 13  |
| NTM      | 50863  | Leukemia, MESH:D015470 | Cytarabine   | 20.83 | 77  |
| OSBPL5   | 114879 | Leukemia, MESH:D015470 | Doxorubic    | 20.83 | 17  |
| PAPSS2   | 9060   | Leukemia, MESH:D015473 | Arsenic Tr   | 20.83 | 262 |
| RAB13    | 5872   | Leukemia, MESH:D015470 | Arsenic Tr   | 20.83 | 21  |
| RAB8A    | 4218   | Leukemia, MESH:D015470 | Doxorubic    | 20.83 | 15  |
| RP2      | 6102   | Leukemia, MESH:D015470 | Arsenic Tr   | 20.83 | 16  |
| SENP1    | 29843  | Leukemia, MESH:D015470 | Arsenic Tr   | 20.83 | 22  |
| SPAG5    | 10615  | Leukemia, MESH:D015473 | arsenite C   | 20.83 | 157 |
| TNFRSF21 | 27242  | Leukemia, MESH:D015473 | Arsenic Tr   | 20.83 | 262 |
| XIST     | 7503   | Leukemia, MESH:D015470 | Air Polluta  | 20.83 | 14  |
| XPO7     | 23039  | Leukemia, MESH:D015470 | Calcitriol I | 20.83 | 9   |
| ZFPM1    | 161882 | Leukemia, MESH:D015470 | Bortezomi    | 20.83 | 15  |
| ACLY     | 47     | Leukemia, MESH:D015473 | Arsenic Ar   | 20.82 | 15  |
| PLPP5    | 84513  | Leukemia, MESH:D015470 | Dexameth     | 20.82 | 14  |
| TTC9     | 23508  | Leukemia, MESH:D015470 | Calcitriol C | 20.82 | 15  |
| EIF5     | 1983   | Leukemia, MESH:D015470 | Arsenic Tr   | 20.81 | 22  |
| TBX3     | 6926   | Leukemia, MESH:D015470 | Decitabine   | 20.81 | 19  |
| ALAD     | 210    | Leukemia, MESH:D015473 | alpha-Toc    | 20.79 | 163 |
| CYP4F2   | 8529   | Leukemia, MESH:D015473 | alpha-Toc    | 20.79 | 156 |
| KCNMB4   | 27345  | Leukemia, MESH:D015473 | Arsenic Ca   | 20.79 | 156 |
| NEFL     | 4747   | Leukemia, MESH:D015470 | Alitretnoi   | 20.79 | 18  |
| PILRA    | 29992  | Leukemia, MESH:D015473 | Arsenic Tr   | 20.79 | 261 |
| AFF1     | 4299   | Leukemia, MESH:D015473 | Arsenic Ar   | 20.78 | 158 |
| CHAT     | 1103   | Leukemia, MESH:D015473 | alpha-Toc    | 20.78 | 161 |
| CLEC2D   | 29121  | Leukemia, MESH:D015473 | Arsenic Tr   | 20.78 | 262 |
| CSGALNA  | 55790  | Leukemia, MESH:D015473 | Arsenic Tr   | 20.78 | 261 |
| DST      | 667    | Leukemia, MESH:D015473 | Antimony     | 20.78 | 264 |
| MXRA7    | 439921 | Leukemia, MESH:D015473 | Arsenic Ar   | 20.78 | 264 |
| SPG7     | 6687   | Leukemia, MESH:D015473 | Arsenic De   | 20.78 | 156 |
| CLU      | 1191   | Leukemia, MESH:D015473 | Arsenic Tr   | 20.77 | 264 |
| EHMT2    | 10919  | Leukemia, MESH:D015470 | Arsenic Tr   | 20.76 | 28  |
| ATF3     | 467    | Leukemia, MESH:D007948 | 2-(2-amin    | 20.76 | 4   |
| CYP2S1   | 29785  | Leukemia, MESH:D015470 | Calcitriol C | 20.76 | 19  |
| GULP1    | 51454  | Leukemia, MESH:D015470 | Arsenic Tr   | 20.76 | 20  |
| RAB27B   | 5874   | Leukemia, MESH:D015470 | Arsenic Tr   | 20.76 | 23  |
| SYT1     | 6857   | Leukemia, MESH:D015470 | Air Polluta  | 20.76 | 12  |
| TENT5A   | 55603  | Leukemia, MESH:D015470 | Cytarabine   | 20.76 | 84  |
| UBE2D3   | 7323   | Leukemia, MESH:D015470 | Dexameth     | 20.76 | 15  |
| UTRN     | 7402   | Leukemia, MESH:D015470 | (+)-JQ1 c    | 20.76 | 22  |
| CASP4    | 837    | Leukemia, MESH:D015473 | Arsenic Ar   | 20.75 | 160 |
| CNR1     | 1268   | Leukemia, MESH:D015470 | Cytarabine   | 20.74 | 95  |

|           |          |                        |               |       |     |
|-----------|----------|------------------------|---------------|-------|-----|
| CYP7A1    | 1581     | Leukemia, MESH:D015473 | Arsenic Ca    | 20.74 | 159 |
| DECR1     | 1666     | Leukemia, MESH:D015470 | Air Polluta   | 20.74 | 23  |
| HRC       | 3270     | Leukemia, MESH:D015470 | Daunorub      | 20.72 | 51  |
| PDE4D     | 5144     | Leukemia, MESH:D015473 | Arsenic Ar    | 20.72 | 266 |
| SLC7A14   | 57709    | Leukemia, MESH:D015473 | Arsenic Ar    | 20.72 | 261 |
| ARHGAP8   | 23779    | Leukemia, MESH:D015470 | Dronabinc     | 20.71 | 9   |
| ATP2A2    | 488      | Leukemia, MESH:D015473 | Arsenic Tr    | 20.71 | 261 |
| CYTH1     | 9267     | Leukemia, MESH:D015470 | Azacitidine   | 20.71 | 96  |
| DDX23     | 9416     | Leukemia, MESH:D015470 | Air Polluta   | 20.71 | 15  |
| FBXO22    | 26263    | Leukemia, MESH:D015470 | Decitabine    | 20.71 | 23  |
| MFNG      | 4242     | Leukemia, MESH:D015470 | Bortezomi     | 20.71 | 16  |
| MYCT1     | 80177    | Leukemia, MESH:D015470 | Doxorubic     | 20.71 | 16  |
| MYL12B    | 103910   | Leukemia, MESH:D015470 | Doxorubic     | 20.71 | 17  |
| NDUFA12   | 55967    | Leukemia, MESH:D015470 | Arsenic Tr    | 20.71 | 20  |
| NDUFS2    | 4720     | Leukemia, MESH:D015470 | Arsenic Tr    | 20.71 | 20  |
| OGFR      | 11054    | Leukemia, MESH:D015470 | Bortezomi     | 20.71 | 18  |
| PAPLN     | 89932    | Leukemia, MESH:D015470 | Air Polluta   | 20.71 | 15  |
| PDCD2     | 5134     | Leukemia, MESH:D015470 | Arsenic Tr    | 20.71 | 17  |
| PDS5A     | 23244    | Leukemia, MESH:D015470 | Doxorubic     | 20.71 | 15  |
| PHF1      | 5252     | Leukemia, MESH:D015470 | Arsenic Tr    | 20.71 | 15  |
| RAB5B     | 5869     | Leukemia, MESH:D015470 | Cytarabine    | 20.71 | 78  |
| TCAF1     | 9747     | Leukemia, MESH:D015470 | Doxorubic     | 20.71 | 17  |
| TFF1      | 7031     | Leukemia, MESH:D015473 | Arsenic Ar    | 20.71 | 162 |
| TMEM204   | 79652    | Leukemia, MESH:D015470 | Dexameth      | 20.71 | 18  |
| UBAP1     | 51271    | Leukemia, MESH:D015470 | Dexameth      | 20.71 | 9   |
| XPO6      | 23214    | Leukemia, MESH:D015470 | Air Polluta   | 20.71 | 10  |
| ZSCAN32   | 54925    | Leukemia, MESH:D015470 | Benzene C     | 20.71 | 20  |
| DNASE2    | 1777     | Leukemia, MESH:D015470 | Decitabine    | 20.7  | 22  |
| GEMIN5    | 25929    | Leukemia, MESH:D015470 | Air Polluta   | 20.7  | 14  |
| GXYLT2    | 727936   | Leukemia, MESH:D015470 | Dexameth      | 20.7  | 14  |
| ICOSLG    | 23308    | Leukemia, MESH:D015470 | Arsenic Tr    | 20.7  | 16  |
| LHX6      | 26468    | Leukemia, MESH:D015470 | Arsenic Tr    | 20.7  | 21  |
| LINC01128 | 643837   | Leukemia, MESH:D015470 | Doxorubic     | 20.7  | 13  |
| NDUFB4    | 4710     | Leukemia, MESH:D015470 | Dexameth      | 20.7  | 18  |
| NDUFS5    | 4725     | Leukemia, MESH:D015473 | arsenite M    | 20.7  | 158 |
| OSER1-D1  | 1.01E+08 | Leukemia, MESH:D015470 | Doxorubic     | 20.7  | 12  |
| PRTFDC1   | 56952    | Leukemia, MESH:D015470 | Decitabine    | 20.7  | 21  |
| REV3L     | 5980     | Leukemia, MESH:D015473 | arsenite D    | 20.7  | 159 |
| SMG1      | 23049    | Leukemia, MESH:D015470 | Dexameth      | 20.7  | 13  |
| SRGAP1    | 57522    | Leukemia, MESH:D015470 | Calcitriol C  | 20.7  | 14  |
| TMEM229   | 161145   | Leukemia, MESH:D015470 | Air Polluta   | 20.7  | 14  |
| ANOS1     | 3730     | Leukemia, MESH:D015470 | Calcitriol C  | 20.69 | 14  |
| CHCHD3    | 54927    | Leukemia, MESH:D015473 | Arsenic ars   | 20.69 | 160 |
| KLHDC7B   | 113730   | Leukemia, MESH:D015470 | Bortezomi     | 20.69 | 10  |
| LYRM4     | 57128    | Leukemia, MESH:D015470 | (+)-JQ1 co    | 20.69 | 10  |
| RPS25     | 6230     | Leukemia, MESH:D015473 | Arsenic Tr    | 20.69 | 262 |
| UBAP2L    | 9898     | Leukemia, MESH:D015473 | Arsenic Tr    | 20.69 | 262 |
| ZBTB25    | 7597     | Leukemia, MESH:D015470 | Air Polluta   | 20.69 | 12  |
| BORCS5    | 118426   | Leukemia, MESH:D015470 | Dexameth      | 20.68 | 12  |
| FGF7      | 2252     | Leukemia, MESH:D015473 | Arsenic Ar    | 20.68 | 159 |
| IL2RB     | 3560     | Leukemia, MESH:D015470 | Benzene B     | 20.68 | 25  |
| RPSA      | 3921     | Leukemia, MESH:D015470 | Arsenic Tr    | 20.68 | 25  |
| CGA       | 1081     | Leukemia, MESH:D007948 | Arsenic Tr    | 20.67 | 3   |
| CHPT1     | 56994    | Leukemia, MESH:D015470 | Dexameth      | 20.67 | 11  |
| CRIM1     | 51232    | Leukemia, MESH:D015470 | Arsenic Tr    | 20.67 | 18  |
| CYP2J2    | 1573     | Leukemia, MESH:D015470 | Arsenic Tr    | 20.67 | 22  |
| H6PD      | 9563     | Leukemia, MESH:D015470 | Arsenic Tr    | 20.67 | 17  |
| HSPG2     | 3339     | Leukemia, MESH:D015470 | Calcitriol li | 20.67 | 12  |



|          |        |                        |              |       |     |
|----------|--------|------------------------|--------------|-------|-----|
| JMJD1C   | 221037 | Leukemia, MESH:D015470 | Air Polluta  | 20.67 | 18  |
| NCAPG2   | 54892  | Leukemia, MESH:D015470 | Calcitriol C | 20.67 | 14  |
| PDGFC    | 56034  | Leukemia, MESH:D015470 | Dexameth     | 20.67 | 23  |
| ST8SIA4  | 7903   | Leukemia, MESH:D015470 | Air Polluta  | 20.67 | 21  |
| TACC3    | 10460  | Leukemia, MESH:D015473 | Arsenic Ca   | 20.67 | 13  |
| TNFRSF19 | 55504  | Leukemia, MESH:D015473 | Arsenic Ca   | 20.67 | 160 |
| TRAF3    | 7187   | Leukemia, MESH:D015470 | Arsenic Tr   | 20.67 | 31  |
| ESR2     | 2100   | Leukemia, MESH:D015470 | Alitretinoin | 20.66 | 42  |
| BDNF     | 627    | Leukemia, MESH:D007948 | 2-(2-amin    | 20.65 | 3   |
| TSC2     | 7249   | Leukemia, MESH:D007948 | 2-(2-amin    | 20.64 | 3   |
| EXO1     | 9156   | Leukemia, MESH:D015473 | Calcitriol C | 20.63 | 157 |
| TBC1D8   | 11138  | Leukemia, MESH:D015473 | arsenite Ci  | 20.63 | 12  |
| CCK      | 885    | Leukemia, MESH:D015470 | Decitabine   | 20.62 | 20  |
| CCNA1    | 8900   | Leukemia, MESH:D015473 | Arsenic Ar   | 20.62 | 265 |
| CENPH    | 64946  | Leukemia, MESH:D015473 | arsenite Ci  | 20.62 | 157 |
| COL11A2  | 1302   | Leukemia, MESH:D015473 | Arsenic De   | 20.62 | 160 |
| HMGB1    | 3146   | Leukemia, MESH:D004915 | Cytarabine   | 20.62 | 3   |
| HOMER2   | 9455   | Leukemia, MESH:D015473 | Arsenic Tr   | 20.62 | 157 |
| IFIT2    | 3433   | Leukemia, MESH:D015473 | Arsenic Tr   | 20.62 | 264 |
| NDUFA13  | 51079  | Leukemia, MESH:D015473 | arsenite Bu  | 20.62 | 157 |
| NDUFS1   | 4719   | Leukemia, MESH:D015473 | Arsenic Tr   | 20.62 | 157 |
| NPR1     | 4881   | Leukemia, MESH:D015473 | Dexameth     | 20.62 | 153 |
| PHLDA2   | 7262   | Leukemia, MESH:D015473 | Arsenic Tr   | 20.62 | 261 |
| PLA2G4C  | 8605   | Leukemia, MESH:D015473 | Arsenic ars  | 20.62 | 12  |
| PRKCZ    | 5590   | Leukemia, MESH:D015470 | Arsenic Tr   | 20.62 | 102 |
| SRGAP3   | 9901   | Leukemia, MESH:D015473 | Arsenic ars  | 20.62 | 23  |
| ARMCX3   | 51566  | Leukemia, MESH:D015473 | Arsenic Tr   | 20.61 | 262 |
| BGLAP    | 632    | Leukemia, MESH:D015473 | Arsenic Tr   | 20.61 | 262 |
| CYB561   | 1534   | Leukemia, MESH:D015473 | Arsenic De   | 20.61 | 156 |
| DLL4     | 54567  | Leukemia, MESH:D015473 | Arsenic Ar   | 20.61 | 161 |
| PCDH9    | 5101   | Leukemia, MESH:D015473 | Arsenic ars  | 20.61 | 158 |
| POSTN    | 10631  | Leukemia, MESH:D007948 | 2-(2-amin    | 20.61 | 3   |
| BOC      | 91653  | Leukemia, MESH:D015470 | Arsenic Tr   | 20.59 | 19  |
| CDK7     | 1022   | Leukemia, MESH:D015470 | Decitabine   | 20.59 | 15  |
| CHST2    | 9435   | Leukemia, MESH:D015470 | Bortezomi    | 20.59 | 14  |
| COCH     | 1690   | Leukemia, MESH:D015470 | Cyclophos    | 20.59 | 19  |
| DIS3     | 22894  | Leukemia, MESH:D015470 | Dexameth     | 20.59 | 17  |
| DYNC1I2  | 1781   | Leukemia, MESH:D015470 | Air Polluta  | 20.59 | 20  |
| DYNC2H1  | 79659  | Leukemia, MESH:D015470 | Doxorubic    | 20.59 | 14  |
| E2F4     | 1874   | Leukemia, MESH:D015470 | Arsenic Tr   | 20.59 | 26  |
| EFS      | 10278  | Leukemia, MESH:D015470 | Dexameth     | 20.59 | 17  |
| FN1      | 2335   | Leukemia, MESH:D007948 | 2-(2-amin    | 20.59 | 3   |
| IFT27    | 11020  | Leukemia, MESH:D015470 | Dexameth     | 20.59 | 14  |
| MAP4K2   | 5871   | Leukemia, MESH:D015470 | Arsenic Tr   | 20.59 | 25  |
| MMACHC   | 25974  | Leukemia, MESH:D015470 | Doxorubic    | 20.59 | 15  |
| MRPL3    | 11222  | Leukemia, MESH:D015470 | Doxorubic    | 20.59 | 15  |
| NPTX1    | 4884   | Leukemia, MESH:D015470 | Bortezomi    | 20.59 | 23  |
| NXT2     | 55916  | Leukemia, MESH:D015470 | Azacitidine  | 20.59 | 16  |
| P2RX4    | 5025   | Leukemia, MESH:D015470 | Benzene B    | 20.59 | 26  |
| PARP1    | 142    | Leukemia, MESH:D007948 | 2-(2-amin    | 20.59 | 4   |
| PCSK6    | 5046   | Leukemia, MESH:D015470 | Calcitriol C | 20.59 | 23  |
| PDPN     | 10630  | Leukemia, MESH:D015470 | Calcitriol C | 20.59 | 77  |
| PTPA     | 5524   | Leukemia, MESH:D015470 | Azacitidine  | 20.59 | 15  |
| RLIM     | 51132  | Leukemia, MESH:D015470 | Indometha    | 20.59 | 9   |
| SIPA1    | 6494   | Leukemia, MESH:D015470 | Benzene C    | 20.59 | 27  |
| SMAGP    | 57228  | Leukemia, MESH:D015470 | Calcitriol C | 20.59 | 15  |
| SNRNP200 | 23020  | Leukemia, MESH:D015470 | Dronabinc    | 20.59 | 15  |
| SORBS2   | 8470   | Leukemia, MESH:D015470 | Cytarabine   | 20.59 | 84  |

|          |        |                              |              |       |     |
|----------|--------|------------------------------|--------------|-------|-----|
| SPTSSA   | 171546 | Leukemia, MESH:D015470       | Doxorubic    | 20.59 | 22  |
| SUMO1    | 7341   | Leukemia, MESH:D015470       | Arsenic Tr   | 20.59 | 21  |
| THSD4    | 79875  | Leukemia, MESH:D015470       | Calcitriol C | 20.59 | 15  |
| TRPV6    | 55503  | Leukemia, MESH:D015470       | Calcitriol C | 20.59 | 12  |
| TSEN15   | 116461 | Leukemia, MESH:D015470       | Bortezomi    | 20.59 | 19  |
| WWTR1    | 25937  | Leukemia, MESH:D015470       | Arsenic Tr   | 20.59 | 17  |
| ZDHHC21  | 340481 | Leukemia, MESH:D015470       | Dexameth     | 20.59 | 14  |
| ZRANB3   | 84083  | Leukemia, MESH:D015470       | Dexameth     | 20.59 | 9   |
| CKM      | 1158   | Leukemia, MESH:D015473       | Arsenic Tr   | 20.58 | 167 |
| PRRC2C   | 23215  | Leukemia, MESH:D004915       | Cytarabine   | 20.58 | 3   |
| AGTR1    | 185    | Leukemia, MESH:D015473       | Arsenic Tr   | 20.57 | 263 |
| ATF5     | 22809  | Leukemia, MESH:D015473       | arsenite Ci  | 20.57 | 156 |
| CALD1    | 800    | Leukemia, MESH:D015473       | Arsenic Ar   | 20.57 | 163 |
| GPT      | 2875   | Leukemia, MESH:D015473       | alpha-Toc    | 20.57 | 163 |
| HK2      | 3099   | Leukemia, MESH:D015473       | Arsenic Ar   | 20.57 | 266 |
| NDRG2    | 57447  | Leukemia, MESH:D015473       | Antimony     | 20.57 | 158 |
| PPL      | 5493   | Leukemia, MESH:D015473       | arsenite Ci  | 20.57 | 158 |
| RB1      | 5925   | Leukemia, MESH:D007948       | 2-(2-amin    | 20.57 | 3   |
| TGIF1    | 7050   | Leukemia, MESH:D015473       | Arsenic Tr   | 20.57 | 267 |
| ULK1     | 8408   | Leukemia, MESH:D015473       | Arsenic Ar   | 20.57 | 266 |
| APOC3    | 345    | Leukemia, MESH:D015470       | Allopurinc   | 20.56 | 41  |
| NSDHL    | 50814  | Leukemia, MESH:D015470       | Arsenic Tr   | 20.56 | 21  |
| UGT1A8   | 54576  | Leukemia, MESH:D015470       | Etoposide    | 20.56 | 22  |
| APLP1    | 333    | Leukemia, MESH:D015473       | Arsenic Etr  | 20.54 | 155 |
| DDX10    | 1662   | Leukemia, MESH:D015473       | Arsenic M    | 20.54 | 158 |
| ERMP1    | 79956  | Leukemia, MESH:D015473       | Arsenic ar:  | 20.54 | 158 |
| RTN1     | 6252   | Leukemia, MESH:D015473       | Arsenic ar:  | 20.54 | 159 |
| PAMR1    | 25891  | Leukemia, MESH:D015473       | Arsenic Ca   | 20.53 | 159 |
| SH3D19   | 152503 | Leukemia, MESH:D015473       | Arsenic Tr   | 20.53 | 262 |
| SNRPB    | 6628   | Leukemia, MESH:D015473       | Arsenic Tr   | 20.53 | 263 |
| WDFY3    | 23001  | Leukemia, MESH:D015473       | Arsenic ar:  | 20.53 | 157 |
| ZNF682   | 91120  | Leukemia, MESH:D015473       | Arsenic Tr   | 20.53 | 262 |
| CD44     | 960    | Leukemia, MESH:D004915       | Cytarabine   | 20.52 | 4   |
| PTPRF    | 5792   | Leukemia, MESH:D015473       | arsenite Ci  | 20.52 | 162 |
| SERPINF1 | 5176   | Leukemia, MESH:D015473       | Arsenic ca   | 20.52 | 159 |
| NECTIN2  | 5819   | Leukemia, MESH:D01therapeuti | Doxorubic    | 20.51 | 26  |
| ALDH4A1  | 8659   | Leukemia, MESH:D015470       | Arsenic Tr   | 20.51 | 21  |
| MARCKSL  | 65108  | Leukemia, MESH:D015470       | Dexameth     | 20.51 | 16  |
| MPZL1    | 9019   | Leukemia, MESH:D004915       | Cytarabine   | 20.51 | 3   |
| ZBTB33   | 10009  | Leukemia, MESH:D015470       | Arsenic Tr   | 20.51 | 19  |
| BBLN     | 79095  | Leukemia, MESH:D015470       | Bortezomi    | 20.5  | 13  |
| C4ORF19  | 55286  | Leukemia, MESH:D015470       | Etoposide    | 20.5  | 16  |
| CANX     | 821    | Leukemia, MESH:D015470       | Arsenic Tr   | 20.5  | 24  |
| GCG      | 2641   | Leukemia, MESH:D015470       | Dexameth     | 20.5  | 12  |
| GTF3C3   | 9330   | Leukemia, MESH:D015470       | Indometha    | 20.5  | 13  |
| IFT43    | 112752 | Leukemia, MESH:D015470       | Dexameth     | 20.5  | 16  |
| IGF2     | 3481   | Leukemia, MESH:D015473       | Arsenic Tr   | 20.5  | 263 |
| MAF      | 4094   | Leukemia, MESH:D015470       | Decitabine   | 20.5  | 23  |
| NR4A2    | 4929   | Leukemia, MESH:D015473       | Arsenic Ar   | 20.5  | 265 |
| PAX9     | 5083   | Leukemia, MESH:D015470       | Arsenic Tr   | 20.5  | 13  |
| R3HDM4   | 91300  | Leukemia, MESH:D015470       | Bortezomi    | 20.5  | 13  |
| RIPK1    | 8737   | Leukemia, MESH:D015470       | Arsenic Tr   | 20.5  | 32  |
| SP140L   | 93349  | Leukemia, MESH:D015470       | Calcitriol T | 20.5  | 11  |
| THRSP    | 7069   | Leukemia, MESH:D015470       | Benzene B    | 20.5  | 35  |
| TMEM234  | 56063  | Leukemia, MESH:D015470       | Air Polluta  | 20.5  | 13  |
| UGT1A10  | 54575  | Leukemia, MESH:D015470       | Indometha    | 20.5  | 15  |
| ZDHHC6   | 64429  | Leukemia, MESH:D015470       | Arsenic Tr   | 20.5  | 19  |
| FAM89B   | 23625  | Leukemia, MESH:D015470       | (+)-JQ1 cc   | 20.49 | 10  |

|         |        |                        |              |       |     |
|---------|--------|------------------------|--------------|-------|-----|
| RUBCN   | 9711   | Leukemia, MESH:D015470 | Dexameth     | 20.49 | 12  |
| UBE3D   | 90025  | Leukemia, MESH:D015470 | Calcitriol[C | 20.49 | 8   |
| APEX2   | 27301  | Leukemia, MESH:D015470 | Doxorubic    | 20.47 | 17  |
| ARPC5L  | 81873  | Leukemia, MESH:D015470 | Arsenic Tr   | 20.47 | 16  |
| CDC5L   | 988    | Leukemia, MESH:D015470 | Doxorubic    | 20.47 | 15  |
| CDX2    | 1045   | Leukemia, MESH:D015470 | Arsenic Tr   | 20.47 | 21  |
| CYSTM1  | 84418  | Leukemia, MESH:D015470 | Calcitriol[C | 20.47 | 16  |
| DEF6    | 50619  | Leukemia, MESH:D015470 | Bortezomi    | 20.47 | 13  |
| GALNT11 | 63917  | Leukemia, MESH:D015470 | Dexameth     | 20.47 | 13  |
| IRF2BPL | 64207  | Leukemia, MESH:D015470 | Doxorubic    | 20.47 | 15  |
| ITGA9   | 3680   | Leukemia, MESH:D015470 | Arsenic Tr   | 20.47 | 21  |
| LINGO1  | 84894  | Leukemia, MESH:D015470 | Calcitriol[C | 20.47 | 14  |
| MLXIP   | 22877  | Leukemia, MESH:D015470 | Dexameth     | 20.47 | 16  |
| MRPL45  | 84311  | Leukemia, MESH:D015470 | Air Polluta  | 20.47 | 9   |
| MTPN    | 136319 | Leukemia, MESH:D015470 | Benzene[C    | 20.47 | 29  |
| NOD1    | 10392  | Leukemia, MESH:D015470 | Decitabine   | 20.47 | 23  |
| PLSCR4  | 57088  | Leukemia, MESH:D015470 | Dasatinib    | 20.47 | 10  |
| PLXNA3  | 55558  | Leukemia, MESH:D015470 | Calcitriol[C | 20.47 | 13  |
| RAB17   | 64284  | Leukemia, MESH:D015470 | Arsenic Tr   | 20.47 | 42  |
| SFRP1   | 6422   | Leukemia, MESH:D015473 | Arsenic Ar   | 20.47 | 265 |
| SNRNP25 | 79622  | Leukemia, MESH:D015470 | Doxorubic    | 20.47 | 14  |
| SPATA20 | 64847  | Leukemia, MESH:D015470 | Arsenic Tr   | 20.47 | 28  |
| ST8SIA2 | 8128   | Leukemia, MESH:D015470 | Azacitidine  | 20.47 | 16  |
| TES     | 26136  | Leukemia, MESH:D015473 | Arsenic Tr   | 20.47 | 263 |
| TGIF2   | 60436  | Leukemia, MESH:D015470 | Etoposide    | 20.47 | 21  |
| TIMM44  | 10469  | Leukemia, MESH:D015470 | Dexameth     | 20.47 | 15  |
| UGT8    | 7368   | Leukemia, MESH:D015470 | Dexameth     | 20.47 | 9   |
| SNRPA   | 6626   | Leukemia, MESH:D015473 | Antimony     | 20.46 | 261 |
| STIL    | 6491   | Leukemia, MESH:D015473 | arsenite[Ci  | 20.46 | 157 |
| BNC2    | 54796  | Leukemia, MESH:D015473 | Arsenic Tr   | 20.45 | 264 |
| CCL24   | 6369   | Leukemia, MESH:D015473 | Arsenic Ar   | 20.45 | 263 |
| CCL7    | 6354   | Leukemia, MESH:D015470 | Arsenic Tr   | 20.45 | 24  |
| CDK1    | 983    | Leukemia, MESH:D007948 | 2-(2-amin    | 20.45 | 3   |
| CHTF18  | 63922  | Leukemia, MESH:D015473 | Arsenic Tr   | 20.45 | 264 |
| LACTB2  | 51110  | Leukemia, MESH:D015473 | arsenite[Ci  | 20.45 | 158 |
| RGS17   | 26575  | Leukemia, MESH:D015473 | Arsenic Ca   | 20.45 | 156 |
| WWC1    | 23286  | Leukemia, MESH:D015473 | Arsenic Tr   | 20.45 | 260 |
| AKR1A1  | 10327  | Leukemia, MESH:D015470 | Arsenic Tr   | 20.44 | 48  |
| C1QB    | 713    | Leukemia, MESH:D015470 | Arsenic Tr   | 20.44 | 26  |
| DNAJC3  | 5611   | Leukemia, MESH:D015470 | Benzene[C    | 20.44 | 37  |
| SHC1    | 6464   | Leukemia, MESH:D007948 | Arsenic Tr   | 20.44 | 3   |
| TUBB4B  | 10383  | Leukemia, MESH:D015470 | Doxorubic    | 20.44 | 20  |
| CEL     | 1056   | Leukemia, MESH:D015470 | Calcitriol[C | 20.43 | 19  |
| CLIP1   | 6249   | Leukemia, MESH:D015470 | Cyclophos    | 20.43 | 16  |
| CMPK2   | 129607 | Leukemia, MESH:D015470 | Doxorubic    | 20.43 | 15  |
| CYLD    | 1540   | Leukemia, MESH:D015470 | Arsenic Tr   | 20.43 | 25  |
| DGKA    | 1606   | Leukemia, MESH:D015470 | Calcitriol[C | 20.43 | 15  |
| FNDC3B  | 64778  | Leukemia, MESH:D015470 | Cyclophos    | 20.43 | 16  |
| HMGA1   | 3159   | Leukemia, MESH:D015473 | alvocidib    | 20.43 | 263 |
| KIF18A  | 81930  | Leukemia, MESH:D015470 | Calcitriol[C | 20.43 | 16  |
| KIF1A   | 547    | Leukemia, MESH:D004915 | Daunorub     | 20.43 | 2   |
| KRT15   | 3866   | Leukemia, MESH:D015470 | Alitretnoi   | 20.43 | 12  |
| SLC23A2 | 9962   | Leukemia, MESH:D015470 | Dexameth     | 20.43 | 15  |
| CREB1   | 1385   | Leukemia, MESH:D007948 | 2-(2-amin    | 20.42 | 3   |
| GADD45A | 1647   | Leukemia, MESH:D007948 | 2-(2-amin    | 20.42 | 4   |
| MYB     | 4602   | Leukemia, MESH:D015473 | Calcitriol[C | 20.42 | 158 |
| NCOR2   | 9612   | Leukemia, MESH:D015473 | Arsenic ar   | 20.42 | 18  |
| XRCC2   | 7516   | Leukemia, MESH:D004915 | Doxorubic    | 20.4  | 3   |

|          |        |                            |              |       |     |
|----------|--------|----------------------------|--------------|-------|-----|
| ACER2    | 340485 | Leukemia, MESH:D015473     | Mercapto     | 20.39 | 154 |
| ITGB3BP  | 23421  | Leukemia, MESH:D015473     | Antimony     | 20.39 | 259 |
| TNFRSF10 | 8795   | Leukemia, MESH:D004915     | Cytarabine   | 20.39 | 2   |
| HPX      | 3263   | Leukemia, MESH:D015470     | Doxorubic    | 20.38 | 21  |
| PAX1     | 5075   | Leukemia, MESH:D015473     | Arsenic ar   | 20.38 | 157 |
| PDLIM3   | 27295  | Leukemia, MESH:D004915     | Cytarabine   | 20.38 | 3   |
| POLD4    | 57804  | Leukemia, MESH:D015473     | Arsenic Ar   | 20.38 | 267 |
| RFC1     | 5981   | Leukemia, MESH:D015473     | Arsenic ca   | 20.38 | 155 |
| SDHA     | 6389   | Leukemia, MESH:D015470     | Arsenic Tr   | 20.38 | 24  |
| TCF21    | 6943   | Leukemia, MESH:D015473     | arsenite C   | 20.38 | 156 |
| TMC6     | 11322  | Leukemia, MESH:D015473     | Calcitriol E | 20.38 | 155 |
| USP2     | 9099   | Leukemia, MESH:D015470     | Chloroqui    | 20.38 | 20  |
| VRK1     | 7443   | Leukemia, MESH:D015473     | arsenite Ci  | 20.38 | 157 |
| PTPN11   | 5781   | Leukemia, MESH:D01marker/m | Arsenic Tr   | 20.37 | 265 |
| ARG1     | 383    | Leukemia, MESH:D015470     | Arsenic Tr   | 20.37 | 27  |
| CIDEA    | 1149   | Leukemia, MESH:D015473     | Arsenic Ar   | 20.37 | 266 |
| EPHA2    | 1969   | Leukemia, MESH:D015473     | Antimony     | 20.37 | 156 |
| HELLS    | 3070   | Leukemia, MESH:D015473     | Calcitriol E | 20.37 | 157 |
| HSPA4L   | 22824  | Leukemia, MESH:D015473     | Arsenic Tr   | 20.37 | 263 |
| MEF2C    | 4208   | Leukemia, MESH:D015473     | Arsenic ar   | 20.37 | 160 |
| RIPOR2   | 9750   | Leukemia, MESH:D015473     | Arsenic Tr   | 20.37 | 261 |
| SAMD9    | 54809  | Leukemia, MESH:D015473     | Arsenic ar   | 20.37 | 158 |
| TMCC3    | 57458  | Leukemia, MESH:D015473     | arsenite Ci  | 20.37 | 156 |
| VASP     | 7408   | Leukemia, MESH:D015473     | Dexameth     | 20.37 | 160 |
| AGTRAP   | 57085  | Leukemia, MESH:D015470     | Bortezomi    | 20.36 | 14  |
| CETP     | 1071   | Leukemia, MESH:D015470     | Alitretnoi   | 20.36 | 26  |
| CTSV     | 1515   | Leukemia, MESH:D015470     | Calcitriol E | 20.36 | 17  |
| DYNC2I2  | 89891  | Leukemia, MESH:D015470     | Arsenic Tr   | 20.36 | 19  |
| H4C9     | 8294   | Leukemia, MESH:D015470     | Dexameth     | 20.36 | 9   |
| HS6ST2   | 90161  | Leukemia, MESH:D015470     | Calcitriol ( | 20.36 | 11  |
| KCNJ16   | 3773   | Leukemia, MESH:D015470     | Decitabine   | 20.36 | 21  |
| LMO1     | 4004   | Leukemia, MESH:D015470     | Benzene E    | 20.36 | 25  |
| LNX2     | 222484 | Leukemia, MESH:D015470     | Doxorubic    | 20.36 | 14  |
| NRM      | 11270  | Leukemia, MESH:D015470     | Calcitriol E | 20.36 | 12  |
| NUDT21   | 11051  | Leukemia, MESH:D015470     | Dexameth     | 20.36 | 12  |
| OS9      | 10956  | Leukemia, MESH:D015470     | Arsenic Tr   | 20.36 | 14  |
| PTRH2    | 51651  | Leukemia, MESH:D015470     | Arsenic Tr   | 20.36 | 21  |
| REXO2    | 25996  | Leukemia, MESH:D015470     | Air Polluta  | 20.36 | 14  |
| RIN1     | 9610   | Leukemia, MESH:D015470     | Azacitidine  | 20.36 | 18  |
| RTN3     | 10313  | Leukemia, MESH:D015470     | Decitabine   | 20.36 | 20  |
| STX7     | 8417   | Leukemia, MESH:D015470     | Air Polluta  | 20.36 | 9   |
| SYNPO2   | 171024 | Leukemia, MESH:D015470     | Dasatinib    | 20.36 | 14  |
| TIMM13   | 26517  | Leukemia, MESH:D015470     | Doxorubic    | 20.36 | 15  |
| ZIC1     | 7545   | Leukemia, MESH:D015470     | Cyclophos    | 20.36 | 15  |
| ANP32E   | 81611  | Leukemia, MESH:D015470     | Calcitriol E | 20.35 | 18  |
| ARID1A   | 8289   | Leukemia, MESH:D015470     | Arsenic Tr   | 20.35 | 19  |
| CALU     | 813    | Leukemia, MESH:D015470     | Dexameth     | 20.35 | 19  |
| EPC1     | 80314  | Leukemia, MESH:D015470     | Dexameth     | 20.35 | 9   |
| FLII     | 2314   | Leukemia, MESH:D015470     | Doxorubic    | 20.35 | 14  |
| GSTT1A   | 563972 | Leukemia, MESH:D015470     | Alitretnoi   | 20.35 | 7   |
| IFT57    | 55081  | Leukemia, MESH:D015470     | Doxorubic    | 20.35 | 14  |
| ITGB8    | 3696   | Leukemia, MESH:D015470     | Calcitriol E | 20.35 | 18  |
| LAMB2    | 3913   | Leukemia, MESH:D015470     | Azacitidine  | 20.35 | 17  |
| LRRK2    | 120892 | Leukemia, MESH:D015470     | Air Polluta  | 20.35 | 15  |
| LTBP2    | 4053   | Leukemia, MESH:D015470     | Calcitriol E | 20.35 | 21  |
| PLP1     | 5354   | Leukemia, MESH:D015470     | Arsenic Tr   | 20.35 | 85  |
| PPP2R1A  | 5518   | Leukemia, MESH:D015470     | Air Polluta  | 20.35 | 33  |
| PRKAB1   | 5564   | Leukemia, MESH:D015470     | Dexameth     | 20.35 | 21  |

|           |        |                            |              |       |     |
|-----------|--------|----------------------------|--------------|-------|-----|
| RND2      | 8153   | Leukemia, MESH:D015470     | Decitabine   | 20.35 | 20  |
| ABCB1     | 5243   | Leukemia, MESH:D004915     | Cytarabine   | 20.34 | 3   |
| H2AX      | 3014   | Leukemia, MESH:D007948     | Arsenic Tr   | 20.34 | 4   |
| C7ORF31   | 136895 | Leukemia, MESH:D015470     | Dronabinc    | 20.33 | 7   |
| CD96      | 10225  | Leukemia, MESH:D015470     | Arsenic Tr   | 20.33 | 15  |
| IDH3A     | 3419   | Leukemia, MESH:D015473     | Arsenic ca   | 20.33 | 17  |
| IGFBP5B   | 403039 | Leukemia, MESH:D015470     | Dexameth     | 20.33 | 7   |
| LINC0033! | 29092  | Leukemia, MESH:D015470     | Dexameth     | 20.33 | 11  |
| TMSB4Y    | 9087   | Leukemia, MESH:D015473     | arsenite Re  | 20.33 | 158 |
| WDFY3-A   | 404201 | Leukemia, MESH:D015470     | Dexameth     | 20.33 | 6   |
| ZNF19     | 7567   | Leukemia, MESH:D015470     | Arsenic Tr   | 20.33 | 18  |
| ZBTB16    | 7704   | Leukemia, MESH:D01marker/m | Arsenic De   | 20.32 | 162 |
| BCAS4     | 55653  | Leukemia, MESH:D015470     | Cytarabine   | 20.32 | 79  |
| BNIP3L    | 665    | Leukemia, MESH:D015473     | Arsenic Tr   | 20.32 | 264 |
| ETS2      | 2114   | Leukemia, MESH:D015473     | Arsenic Tr   | 20.32 | 263 |
| H3C6      | 8353   | Leukemia, MESH:D015470     | Bortezomi    | 20.32 | 13  |
| IGHG1     | 3500   | Leukemia, MESH:D015470     | Arsenic Tr   | 20.32 | 18  |
| INHBB     | 3625   | Leukemia, MESH:D015473     | Arsenic Ar   | 20.32 | 265 |
| LRFN4     | 78999  | Leukemia, MESH:D015470     | Bortezomi    | 20.32 | 14  |
| MFSD4B    | 91749  | Leukemia, MESH:D015470     | Arsenic Tr   | 20.32 | 15  |
| PPP1R1B   | 84152  | Leukemia, MESH:D015470     | Doxorubic    | 20.32 | 21  |
| SCYL3     | 57147  | Leukemia, MESH:D015470     | Air Polluta  | 20.32 | 8   |
| VIM       | 7431   | Leukemia, MESH:D007948     | 2-(2-amin    | 20.32 | 3   |
| ARMT1     | 79624  | Leukemia, MESH:D015470     | Air Polluta  | 20.31 | 13  |
| B3GNT9    | 84752  | Leukemia, MESH:D015470     | Dexameth     | 20.31 | 15  |
| CASP7     | 840    | Leukemia, MESH:D007948     | 2-(2-amin    | 20.31 | 3   |
| PNMA8A    | 55228  | Leukemia, MESH:D015470     | Decitabine   | 20.31 | 18  |
| SCGN      | 10590  | Leukemia, MESH:D015470     | Dexameth     | 20.31 | 9   |
| SMIM11    | 54065  | Leukemia, MESH:D015470     | Bortezomi    | 20.31 | 9   |
| YIPF2     | 78992  | Leukemia, MESH:D015470     | Doxorubic    | 20.31 | 13  |
| ZDHHC11   | 79844  | Leukemia, MESH:D015470     | Doxorubic    | 20.31 | 21  |
| ZNF706    | 51123  | Leukemia, MESH:D015470     | Dexameth     | 20.31 | 8   |
| ITGB7     | 3695   | Leukemia, MESH:D015473     | Arsenic Tr   | 20.3  | 265 |
| SLC17A6   | 57084  | Leukemia, MESH:D015473     | arsenite C   | 20.3  | 17  |
| TNFRSF14  | 8764   | Leukemia, MESH:D015473     | Arsenic Ar   | 20.3  | 265 |
| FGF10     | 2255   | Leukemia, MESH:D015473     | Arsenic Ar   | 20.29 | 264 |
| KRT13     | 3860   | Leukemia, MESH:D015473     | Arsenic Tr   | 20.29 | 262 |
| MAST4     | 375449 | Leukemia, MESH:D015473     | Arsenic ars  | 20.29 | 158 |
| NLRP3     | 114548 | Leukemia, MESH:D015470     | Air Polluta  | 20.29 | 25  |
| ACSL3     | 2181   | Leukemia, MESH:D015473     | Calcitriol E | 20.28 | 13  |
| PRKCZ     | 5590   | Leukemia, MESH:D015473     | Arsenic Ar   | 20.28 | 173 |
| CEMIP     | 57214  | Leukemia, MESH:D015470     | Calcitriol C | 20.27 | 81  |
| CENPK     | 64105  | Leukemia, MESH:D015470     | Calcitriol E | 20.27 | 17  |
| GZMA      | 3001   | Leukemia, MESH:D015470     | Arsenic Tr   | 20.27 | 18  |
| P2RX7     | 5027   | Leukemia, MESH:D015473     | Arsenic Etr  | 20.27 | 158 |
| PRKAG2    | 51422  | Leukemia, MESH:D015470     | Dexameth     | 20.27 | 17  |
| SLC51A    | 200931 | Leukemia, MESH:D015470     | Calcitriol E | 20.27 | 12  |
| TNIP1     | 10318  | Leukemia, MESH:D015470     | Dexameth     | 20.27 | 18  |
| PTK2B     | 2185   | Leukemia, MESH:D015470     | Arsenic Tr   | 20.26 | 25  |
| TARDBP    | 23435  | Leukemia, MESH:D015470     | Chloroqui    | 20.26 | 17  |
| ERG       | 2078   | Leukemia, MESH:D01marker/m | Androgen     | 20.25 | 15  |
| ALMS1     | 7840   | Leukemia, MESH:D015470     | Calcitriol E | 20.25 | 12  |
| CEP152    | 22995  | Leukemia, MESH:D015470     | Calcitriol E | 20.25 | 11  |
| CRYAA     | 1409   | Leukemia, MESH:D015470     | Azacitidine  | 20.25 | 14  |
| GSTA2     | 2939   | Leukemia, MESH:D015470     | Alitretnoi   | 20.25 | 29  |
| JPH2      | 57158  | Leukemia, MESH:D015470     | Arsenic Tr   | 20.25 | 20  |
| MIR210    | 406992 | Leukemia, MESH:D015470     | Air Polluta  | 20.25 | 19  |
| NOS1      | 4842   | Leukemia, MESH:D015470     | Bortezomi    | 20.25 | 18  |

|          |        |                        |              |       |     |
|----------|--------|------------------------|--------------|-------|-----|
| S100A7   | 6278   | Leukemia, MESH:D015473 | Antimony     | 20.25 | 155 |
| SPRR3    | 6707   | Leukemia, MESH:D015473 | Antimony     | 20.25 | 263 |
| VPS41    | 27072  | Leukemia, MESH:D015470 | Air Polluta  | 20.25 | 14  |
| BBS2     | 583    | Leukemia, MESH:D015470 | Decitabine   | 20.24 | 22  |
| BCL2L10  | 10017  | Leukemia, MESH:D015470 | Arsenic Tr   | 20.24 | 20  |
| CLIP2    | 7461   | Leukemia, MESH:D015470 | Dexameth     | 20.24 | 17  |
| CMSS1    | 84319  | Leukemia, MESH:D015470 | Calcitriol[C | 20.24 | 11  |
| CTDSP2   | 10106  | Leukemia, MESH:D015470 | Dexameth     | 20.24 | 14  |
| DPAGT1   | 1798   | Leukemia, MESH:D015470 | Arsenic Tr   | 20.24 | 27  |
| FAM222A  | 84915  | Leukemia, MESH:D015470 | Dexameth     | 20.24 | 14  |
| GLMP     | 112770 | Leukemia, MESH:D015470 | Dexameth     | 20.24 | 11  |
| L3MBTL3  | 84456  | Leukemia, MESH:D015470 | Calcitriol[C | 20.24 | 8   |
| LARP4B   | 23185  | Leukemia, MESH:D015470 | Air Polluta  | 20.24 | 14  |
| MBD3     | 53615  | Leukemia, MESH:D015470 | Arsenic Tr   | 20.24 | 30  |
| MORC3    | 23515  | Leukemia, MESH:D015470 | Decitabine   | 20.24 | 22  |
| OPCML    | 4978   | Leukemia, MESH:D015470 | Arsenic Tr   | 20.24 | 20  |
| PEX13    | 5194   | Leukemia, MESH:D015470 | Calcitriol[C | 20.24 | 11  |
| PRKD2    | 25865  | Leukemia, MESH:D015470 | Doxorubic    | 20.24 | 15  |
| SLC22A15 | 55356  | Leukemia, MESH:D015470 | Arsenic Tr   | 20.24 | 19  |
| STK26    | 51765  | Leukemia, MESH:D015470 | Calcitriol[C | 20.24 | 14  |
| TDRD7    | 23424  | Leukemia, MESH:D015470 | Arsenic Tr   | 20.24 | 20  |
| UQCR11   | 10975  | Leukemia, MESH:D015470 | Arsenic Tr   | 20.24 | 21  |
| XPNPPEP1 | 7511   | Leukemia, MESH:D015470 | Arsenic Tr   | 20.24 | 15  |
| MGST1    | 4257   | Leukemia, MESH:D015473 | Antimony     | 20.23 | 265 |
| MIR148A  | 406940 | Leukemia, MESH:D015473 | Arsenic[Ar   | 20.23 | 159 |
| MT3      | 4504   | Leukemia, MESH:D015473 | Arsenic[Ar   | 20.23 | 267 |
| TFRC     | 7037   | Leukemia, MESH:D015473 | Arsenic[Ar   | 20.23 | 264 |
| ADGRE5   | 976    | Leukemia, MESH:D015473 | Arsenic Tr   | 20.22 | 260 |
| ADORA3   | 140    | Leukemia, MESH:D015473 | Calcitriol[C | 20.22 | 158 |
| ARHGAP4  | 23526  | Leukemia, MESH:D015473 | Arsenic[De   | 20.22 | 159 |
| BAIAP2L1 | 55971  | Leukemia, MESH:D015473 | Arsenic[Ar   | 20.22 | 266 |
| C5       | 727    | Leukemia, MESH:D015473 | Arsenic[Ar   | 20.22 | 264 |
| CLBA1    | 122616 | Leukemia, MESH:D015473 | Arsenic[De   | 20.22 | 156 |
| IGFBP6   | 3489   | Leukemia, MESH:D015473 | Arsenic[ar:  | 20.22 | 158 |
| TIGAR    | 57103  | Leukemia, MESH:D015473 | Arsenic Tr   | 20.22 | 158 |
| TNFSF15  | 9966   | Leukemia, MESH:D015473 | Arsenic[Ar   | 20.22 | 264 |
| VAV2     | 7410   | Leukemia, MESH:D015473 | Arsenic[Ar   | 20.22 | 161 |
| CASP3    | 836    | Leukemia, MESH:D004915 | Cytarabine   | 20.21 | 4   |
| CBFB     | 865    | Leukemia, MESH:D015473 | Arsenic[ar:  | 20.21 | 159 |
| RPL30    | 6156   | Leukemia, MESH:D015473 | Arsenic[Ar   | 20.21 | 265 |
| ACOT2    | 10965  | Leukemia, MESH:D015470 | Alitretinoin | 20.2  | 16  |
| EFHD1    | 80303  | Leukemia, MESH:D015470 | Cytarabine   | 20.2  | 87  |
| SP7      | 121340 | Leukemia, MESH:D015470 | Arsenic Tr   | 20.2  | 20  |
| DDX39A   | 10212  | Leukemia, MESH:D015470 | Calcitriol[C | 20.19 | 15  |
| HPCAL1   | 3241   | Leukemia, MESH:D015470 | Arsenic Tr   | 20.19 | 27  |
| RPS27    | 6232   | Leukemia, MESH:D015470 | Arsenic Tr   | 20.19 | 16  |
| SYNPO    | 11346  | Leukemia, MESH:D015470 | Dexameth     | 20.19 | 14  |
| ECT2     | 1894   | Leukemia, MESH:D015473 | arsenite[Ci  | 20.18 | 157 |
| F2       | 2147   | Leukemia, MESH:D015470 | Cytarabine   | 20.18 | 90  |
| GJA1     | 2697   | Leukemia, MESH:D015473 | Arsenic Tr   | 20.18 | 263 |
| PCSK9    | 255738 | Leukemia, MESH:D007948 | 2-(2-amin    | 20.18 | 3   |
| PTHLH    | 5744   | Leukemia, MESH:D015473 | Arsenic[ar:  | 20.18 | 158 |
| TLR3     | 7098   | Leukemia, MESH:D015473 | Arsenic Tr   | 20.18 | 262 |
| TUBB6    | 84617  | Leukemia, MESH:D015473 | Arsenic[Ca   | 20.18 | 158 |
| BIRC5    | 332    | Leukemia, MESH:D007948 | 2-(2-amin    | 20.17 | 3   |
| TGM2     | 7052   | Leukemia, MESH:D015473 | Arsenic Tr   | 20.17 | 267 |
| CDH5     | 1003   | Leukemia, MESH:D007948 | 2-(2-amin    | 20.16 | 3   |
| PPARGC1, | 10891  | Leukemia, MESH:D015473 | alpha-Toc    | 20.16 | 266 |

|          |        |                        |              |       |     |
|----------|--------|------------------------|--------------|-------|-----|
| EPB41L2  | 2037   | Leukemia, MESH:D015473 | Arsenic Ar   | 20.15 | 264 |
| GK       | 2710   | Leukemia, MESH:D015470 | Benzene C    | 20.15 | 31  |
| GP1R1    | 2852   | Leukemia, MESH:D007948 | 2-(2-amin    | 20.15 | 4   |
| KCNAB2   | 8514   | Leukemia, MESH:D015473 | Arsenic Et   | 20.15 | 160 |
| PKD2L1   | 9033   | Leukemia, MESH:D015470 | Arsenic Tr   | 20.15 | 16  |
| PRELP    | 5549   | Leukemia, MESH:D015473 | Arsenic Tr   | 20.15 | 156 |
| RAD17    | 5884   | Leukemia, MESH:D015473 | Arsenic Tr   | 20.15 | 261 |
| RASSF2   | 9770   | Leukemia, MESH:D015473 | arsenite C   | 20.15 | 156 |
| SVEP1    | 79987  | Leukemia, MESH:D015473 | arsenite C   | 20.15 | 156 |
| ABCA3    | 21     | Leukemia, MESH:D015473 | Arsenic Ar   | 20.14 | 162 |
| ATP9A    | 10079  | Leukemia, MESH:D015470 | Benzene C    | 20.14 | 21  |
| BDKRB2   | 624    | Leukemia, MESH:D015470 | Cyclophos    | 20.14 | 20  |
| CBX7     | 23492  | Leukemia, MESH:D015473 | Arsenic Tr   | 20.14 | 261 |
| CEP104   | 9731   | Leukemia, MESH:D015470 | Doxorubic    | 20.14 | 15  |
| DCX      | 1641   | Leukemia, MESH:D015473 | Arsenic Ar   | 20.14 | 262 |
| DTX3L    | 151636 | Leukemia, MESH:D015470 | Air Polluta  | 20.14 | 14  |
| EML3     | 256364 | Leukemia, MESH:D015470 | Air Polluta  | 20.14 | 19  |
| FAM76A   | 199870 | Leukemia, MESH:D015470 | Bortezomi    | 20.14 | 13  |
| FAM83A   | 84985  | Leukemia, MESH:D015470 | Decitabine   | 20.14 | 14  |
| INPP1    | 3628   | Leukemia, MESH:D015473 | Arsenic Tr   | 20.14 | 261 |
| INTS7    | 25896  | Leukemia, MESH:D015470 | Air Polluta  | 20.14 | 16  |
| KCMF1    | 56888  | Leukemia, MESH:D015470 | Bortezomi    | 20.14 | 13  |
| MAGED1   | 9500   | Leukemia, MESH:D015470 | Cyclophos    | 20.14 | 20  |
| PLEKHA6  | 22874  | Leukemia, MESH:D015473 | Arsenic Ar   | 20.14 | 266 |
| PPP1R14C | 81706  | Leukemia, MESH:D015470 | Calcitriol C | 20.14 | 19  |
| RAB6A    | 5870   | Leukemia, MESH:D015473 | arsenite D   | 20.14 | 161 |
| SEPTIN11 | 55752  | Leukemia, MESH:D015473 | Arsenic Ar   | 20.14 | 268 |
| SFTPA1   | 653509 | Leukemia, MESH:D015470 | Calcitriol C | 20.14 | 10  |
| VMO1     | 284013 | Leukemia, MESH:D015470 | Arsenic Tr   | 20.14 | 29  |
| ZBTB14   | 7541   | Leukemia, MESH:D015470 | Indometha    | 20.14 | 8   |
| ZNF467   | 168544 | Leukemia, MESH:D015470 | Cytarabine   | 20.14 | 85  |
| ABHD11   | 83451  | Leukemia, MESH:D015470 | Dexameth     | 20.13 | 14  |
| ARPC4    | 10093  | Leukemia, MESH:D015470 | Doxorubic    | 20.13 | 15  |
| BTD      | 686    | Leukemia, MESH:D015470 | Dexameth     | 20.13 | 13  |
| BTN3A1   | 11119  | Leukemia, MESH:D015470 | Dexameth     | 20.13 | 13  |
| CFAP44   | 55779  | Leukemia, MESH:D015470 | Dronabinc    | 20.13 | 10  |
| COX18    | 285521 | Leukemia, MESH:D015470 | Doxorubic    | 20.13 | 13  |
| CREB3L1  | 90993  | Leukemia, MESH:D015470 | Calcitriol C | 20.13 | 21  |
| CXCL3    | 2921   | Leukemia, MESH:D015473 | Arsenic Ca   | 20.13 | 14  |
| EML6     | 400954 | Leukemia, MESH:D015470 | Dexameth     | 20.13 | 10  |
| ENPP5    | 59084  | Leukemia, MESH:D015470 | Air Polluta  | 20.13 | 9   |
| FBXL14   | 144699 | Leukemia, MESH:D015470 | Dexameth     | 20.13 | 8   |
| FNIP2    | 57600  | Leukemia, MESH:D015470 | Arsenic Tr   | 20.13 | 19  |
| GATA2    | 2624   | Leukemia, MESH:D007948 | 2-(2-amin    | 20.13 | 2   |
| HTATSF1  | 27336  | Leukemia, MESH:D015470 | Arsenic Tr   | 20.13 | 19  |
| ITPRIPL2 | 162073 | Leukemia, MESH:D015470 | Dexameth     | 20.13 | 9   |
| JPH1     | 56704  | Leukemia, MESH:D015470 | Dexameth     | 20.13 | 14  |
| LRATD1   | 151354 | Leukemia, MESH:D015470 | Calcitriol C | 20.13 | 13  |
| LRR17    | 10234  | Leukemia, MESH:D015470 | Dexameth     | 20.13 | 11  |
| LRR120   | 55222  | Leukemia, MESH:D015470 | Dexameth     | 20.13 | 13  |
| MAP1B    | 4131   | Leukemia, MESH:D015473 | Arsenic Tr   | 20.13 | 267 |
| MAVS     | 57506  | Leukemia, MESH:D015470 | Decitabine   | 20.13 | 20  |
| N4BP2    | 55728  | Leukemia, MESH:D015470 | Dexameth     | 20.13 | 15  |
| PARP10   | 84875  | Leukemia, MESH:D015470 | Doxorubic    | 20.13 | 13  |
| PPM1H    | 57460  | Leukemia, MESH:D015470 | Calcitriol C | 20.13 | 20  |
| RAB11B   | 9230   | Leukemia, MESH:D015470 | Alitretinoi  | 20.13 | 15  |
| RAB18    | 22931  | Leukemia, MESH:D015470 | Dexameth     | 20.13 | 14  |
| RPRD1B   | 58490  | Leukemia, MESH:D015470 | Dexameth     | 20.13 | 11  |

|         |        |                        |              |       |     |
|---------|--------|------------------------|--------------|-------|-----|
| SHROOM: | 57619  | Leukemia, MESH:D015470 | Calcitriol C | 20.13 | 14  |
| SLC1A5  | 6510   | Leukemia, MESH:D015473 | Arsenic Ca   | 20.13 | 14  |
| TMEM135 | 65084  | Leukemia, MESH:D015470 | Dexameth     | 20.13 | 11  |
| TMEM30B | 161291 | Leukemia, MESH:D015470 | Calcitriol C | 20.13 | 9   |
| TRIM22  | 10346  | Leukemia, MESH:D015470 | Decitabine   | 20.13 | 24  |
| TRIM56  | 81844  | Leukemia, MESH:D015470 | Calcitriol C | 20.13 | 14  |
| TTK     | 7272   | Leukemia, MESH:D015473 | Calcitriol C | 20.13 | 155 |
| UNC13B  | 10497  | Leukemia, MESH:D015470 | Dexameth     | 20.13 | 14  |
| USP13   | 8975   | Leukemia, MESH:D015470 | Dexameth     | 20.13 | 9   |
| CRIP1   | 1396   | Leukemia, MESH:D015470 | Arsenic Tr   | 20.12 | 18  |
| PHYH    | 5264   | Leukemia, MESH:D015470 | Decitabine   | 20.12 | 25  |
| PIK3C3  | 5289   | Leukemia, MESH:D015470 | ABT-737 A    | 20.12 | 20  |
| RBBP4   | 5928   | Leukemia, MESH:D015470 | Arsenic Tr   | 20.12 | 23  |
| RPS6KA5 | 9252   | Leukemia, MESH:D015470 | Benzene C    | 20.12 | 29  |
| VSNL1   | 7447   | Leukemia, MESH:D015470 | Arsenic Tr   | 20.12 | 20  |
| TAF12   | 338811 | Leukemia, MESH:D015473 | arsenite Cl  | 20.1  | 7   |
| TAX1BP3 | 30851  | Leukemia, MESH:D004915 | Daunorub     | 20.1  | 3   |
| CDH1    | 999    | Leukemia, MESH:D007948 | 2-(2-amin    | 20.09 | 3   |
| HAL     | 3034   | Leukemia, MESH:D015473 | alpha-Toc    | 20.09 | 157 |
| NCOR1   | 9611   | Leukemia, MESH:D015470 | Calcitriol C | 20.09 | 18  |
| SLC1A4  | 6509   | Leukemia, MESH:D015470 | Dasatinib I  | 20.09 | 13  |
| SPRR2A  | 6700   | Leukemia, MESH:D015473 | Arsenic Ar   | 20.09 | 160 |
| STAT6   | 6778   | Leukemia, MESH:D015473 | 4'-methox    | 20.09 | 156 |
| GLB1    | 2720   | Leukemia, MESH:D015473 | Arsenic Tr   | 20.08 | 261 |
| HNRNPR  | 10236  | Leukemia, MESH:D015473 | Arsenic Ar   | 20.08 | 160 |
| KLF2    | 10365  | Leukemia, MESH:D015473 | Arsenic Ar   | 20.08 | 162 |
| THRB    | 7068   | Leukemia, MESH:D015473 | Arsenic Ar   | 20.08 | 266 |
| TPX2    | 22974  | Leukemia, MESH:D015473 | arsenite C   | 20.08 | 158 |
| UGT1A9  | 54600  | Leukemia, MESH:D015470 | Arsenic Tr   | 20.08 | 23  |
| ANKRD36 | 57730  | Leukemia, MESH:D015473 | arsenite D   | 20.07 | 155 |
| GDI2    | 2665   | Leukemia, MESH:D015473 | Arsenic Ar   | 20.07 | 263 |
| HSD11B1 | 3290   | Leukemia, MESH:D015473 | Calcitriol C | 20.07 | 9   |
| JCHAIN  | 3512   | Leukemia, MESH:D015473 | arsenite D   | 20.07 | 8   |
| KCNK2   | 3776   | Leukemia, MESH:D015473 | Arsenic Tr   | 20.07 | 155 |
| TENM2   | 57451  | Leukemia, MESH:D015473 | Arsenic Ar   | 20.07 | 160 |
| WNT10B  | 7480   | Leukemia, MESH:D015473 | Dexameth     | 20.07 | 153 |
| CASZ1   | 54897  | Leukemia, MESH:D015473 | Arsenic Ca   | 20.06 | 156 |
| CGNL1   | 84952  | Leukemia, MESH:D015473 | Arsenic Tr   | 20.06 | 263 |
| ELF1    | 1997   | Leukemia, MESH:D015473 | Arsenic Tr   | 20.06 | 263 |
| PHF19   | 26147  | Leukemia, MESH:D015473 | arsenite C   | 20.06 | 158 |
| SIX1    | 6495   | Leukemia, MESH:D015473 | arsenite D   | 20.06 | 156 |
| TPCN1   | 53373  | Leukemia, MESH:D015473 | Arsenic Ar   | 20.06 | 156 |
| CD163   | 9332   | Leukemia, MESH:D015470 | Calcitriol C | 20.04 | 12  |
| DLGAP5  | 9787   | Leukemia, MESH:D015473 | Calcitriol C | 20.04 | 155 |
| ELL2    | 22936  | Leukemia, MESH:D015470 | Dronabinc    | 20.04 | 10  |
| IMPA2   | 3613   | Leukemia, MESH:D015470 | Arsenic Tr   | 20.04 | 19  |
| MYBBP1A | 10514  | Leukemia, MESH:D015470 | Arsenic Tr   | 20.04 | 23  |
| NINJ1   | 4814   | Leukemia, MESH:D015470 | Air Polluta  | 20.04 | 18  |
| OR8B8   | 26493  | Leukemia, MESH:D015470 | Azacitidin   | 20.04 | 10  |
| PPP1R1B | 84152  | Leukemia, MESH:D015473 | arsenite G   | 20.04 | 157 |
| SLC1A3  | 6507   | Leukemia, MESH:D015473 | Calcitriol C | 20.04 | 156 |
| VEGFB   | 7423   | Leukemia, MESH:D015470 | Arsenic Tr   | 20.04 | 18  |
| ACO2    | 50     | Leukemia, MESH:D015470 | Arsenic Tr   | 20.03 | 25  |
| ARPP21  | 10777  | Leukemia, MESH:D015470 | Bezafibrat   | 20.03 | 12  |
| AXIN2   | 8313   | Leukemia, MESH:D015473 | Arsenic Tr   | 20.03 | 263 |
| FCGR2A  | 2212   | Leukemia, MESH:D015470 | Air Polluta  | 20.03 | 81  |
| HAX1    | 10456  | Leukemia, MESH:D015470 | Carboplati   | 20.03 | 15  |
| IGSF11  | 152404 | Leukemia, MESH:D015470 | Decitabine   | 20.03 | 26  |



|          |        |                        |              |       |     |
|----------|--------|------------------------|--------------|-------|-----|
| INS      | 3630   | Leukemia, MESH:D015473 | arsenite[Ci  | 20.03 | 158 |
| SAT2     | 112483 | Leukemia, MESH:D015470 | Arsenic Tr   | 20.03 | 21  |
| TAGLN3   | 29114  | Leukemia, MESH:D015470 | Daunorub     | 20.03 | 41  |
| TOX2     | 84969  | Leukemia, MESH:D015470 | Decitabine   | 20.03 | 15  |
| TRIAP1   | 51499  | Leukemia, MESH:D015470 | Doxorubic    | 20.03 | 15  |
| TUBA4A   | 7277   | Leukemia, MESH:D015470 | Cyclophos    | 20.03 | 28  |
| USP34    | 9736   | Leukemia, MESH:D015470 | Air Polluta  | 20.03 | 16  |
| ARC      | 23237  | Leukemia, MESH:D007948 | 2-(2-amin    | 20.02 | 3   |
| ARHGEF9  | 23229  | Leukemia, MESH:D015470 | Dexameth     | 20.02 | 15  |
| ARID4A   | 5926   | Leukemia, MESH:D015470 | Dexameth     | 20.02 | 15  |
| CTSF     | 8722   | Leukemia, MESH:D015470 | Dexameth     | 20.02 | 14  |
| DNAJC19  | 131118 | Leukemia, MESH:D015470 | Dexameth     | 20.02 | 14  |
| DNAJC6   | 9829   | Leukemia, MESH:D015470 | Dexameth     | 20.02 | 15  |
| DNAJC7   | 7266   | Leukemia, MESH:D015470 | Arsenic Tr   | 20.02 | 18  |
| FILIP1   | 27145  | Leukemia, MESH:D015470 | Arsenic Tr   | 20.02 | 25  |
| GAK      | 2580   | Leukemia, MESH:D015470 | Arsenic Tr   | 20.02 | 19  |
| GALNT12  | 79695  | Leukemia, MESH:D015470 | Arsenic Tr   | 20.02 | 14  |
| HACD2    | 201562 | Leukemia, MESH:D015470 | Calcitriol[E | 20.02 | 15  |
| HLA-C    | 3107   | Leukemia, MESH:D015470 | Arsenic Tr   | 20.02 | 19  |
| LRRC28   | 123355 | Leukemia, MESH:D015470 | Decitabine   | 20.02 | 22  |
| LRRC8C   | 84230  | Leukemia, MESH:D015470 | Doxorubic    | 20.02 | 18  |
| MOCS2    | 4338   | Leukemia, MESH:D015470 | Air Polluta  | 20.02 | 15  |
| NOP16    | 51491  | Leukemia, MESH:D015470 | Dexameth     | 20.02 | 11  |
| NSUN2    | 54888  | Leukemia, MESH:D015470 | Dexameth     | 20.02 | 14  |
| PLXNB1   | 5364   | Leukemia, MESH:D015470 | Dexameth     | 20.02 | 10  |
| RDH10B   | 378722 | Leukemia, MESH:D015470 | Alitretnoi   | 20.02 | 7   |
| SDAD1    | 55153  | Leukemia, MESH:D015470 | Air Polluta  | 20.02 | 9   |
| SERTAD4  | 56256  | Leukemia, MESH:D015470 | Decitabine   | 20.02 | 15  |
| SETD7    | 80854  | Leukemia, MESH:D015470 | Arsenic Tr   | 20.02 | 19  |
| SLC25A19 | 60386  | Leukemia, MESH:D015470 | Calcitriol[E | 20.02 | 11  |
| TBC1D31  | 93594  | Leukemia, MESH:D015470 | Doxorubic    | 20.02 | 15  |
| ZDHHC14  | 79683  | Leukemia, MESH:D015470 | Benzene[E    | 20.02 | 28  |
| CCDC192  | 728586 | Leukemia, MESH:D015470 | Dexameth     | 20.01 | 9   |
| LINC0059 | 81698  | Leukemia, MESH:D015470 | Dexameth     | 20.01 | 6   |
| SCAND2P  | 54581  | Leukemia, MESH:D015470 | Arsenic Tr   | 20.01 | 15  |
| LDLR     | 3949   | Leukemia, MESH:D015473 | Arsenic[Ca   | 20    | 159 |
| NOTCH1   | 4851   | Leukemia, MESH:D015473 | Arsenic[Ar   | 20    | 266 |
| PLEK     | 5341   | Leukemia, MESH:D015473 | Arsenic[Re   | 20    | 162 |
| SNAI3-AS | 197187 | Leukemia, MESH:D015470 | Dexameth     | 20    | 9   |
| YWHAQA   | 399487 | Leukemia, MESH:D015470 | Dexameth     | 20    | 5   |
| ARL17A   | 51326  | Leukemia, MESH:D015470 | Dexameth     | 19.99 | 11  |
| BACE1    | 23621  | Leukemia, MESH:D015473 | alpha-Toc    | 19.99 | 264 |
| C6ORF89  | 221477 | Leukemia, MESH:D015470 | Dexameth     | 19.99 | 11  |
| CASP8AP2 | 9994   | Leukemia, MESH:D015473 | Arsenic Tr   | 19.99 | 155 |
| CD151    | 977    | Leukemia, MESH:D015473 | Arsenic[ca   | 19.99 | 155 |
| CENPM    | 79019  | Leukemia, MESH:D015473 | Arsenic[ar   | 19.99 | 160 |
| CST6     | 1474   | Leukemia, MESH:D015473 | Arsenic[Ca   | 19.99 | 156 |
| HYMAI    | 57061  | Leukemia, MESH:D015470 | Methotrex    | 19.99 | 9   |
| RERE     | 473    | Leukemia, MESH:D015473 | Arsenic[Ar   | 19.99 | 161 |
| RHPN2    | 85415  | Leukemia, MESH:D015473 | Arsenic[Ca   | 19.99 | 158 |
| RPF2     | 84154  | Leukemia, MESH:D015473 | Arsenic Tr   | 19.99 | 263 |
| EGR1     | 1958   | Leukemia, MESH:D007948 | 2-(2-amin    | 19.98 | 3   |
| FOXJ2    | 55810  | Leukemia, MESH:D015470 | Doxorubic    | 19.98 | 22  |
| XBP1     | 7494   | Leukemia, MESH:D015473 | alpha-Toc    | 19.98 | 268 |
| BIN3     | 55909  | Leukemia, MESH:D015470 | Doxorubic    | 19.97 | 21  |
| FAM214A  | 56204  | Leukemia, MESH:D015470 | Dexameth     | 19.97 | 11  |
| FKBP11   | 51303  | Leukemia, MESH:D015470 | Arsenic Tr   | 19.97 | 18  |
| LEFTY2   | 7044   | Leukemia, MESH:D015470 | Doxorubic    | 19.97 | 14  |

|          |        |                        |              |       |     |
|----------|--------|------------------------|--------------|-------|-----|
| MORC2    | 22880  | Leukemia, MESH:D015470 | Bortezomi    | 19.97 | 15  |
| NAT1     | 9      | Leukemia, MESH:D015470 | Calcitriol F | 19.97 | 14  |
| NSUN7    | 79730  | Leukemia, MESH:D015470 | Decitabine   | 19.97 | 14  |
| TMSB10   | 9168   | Leukemia, MESH:D015470 | Doxorubic    | 19.97 | 16  |
| UCP3     | 7352   | Leukemia, MESH:D015470 | Bezafibrat   | 19.97 | 17  |
| UGDH     | 7358   | Leukemia, MESH:D015470 | Alitretinoi  | 19.97 | 17  |
| ANTKMT   | 65990  | Leukemia, MESH:D015470 | Indometha    | 19.96 | 10  |
| CCNB1    | 891    | Leukemia, MESH:D007948 | 2-(2-amin    | 19.96 | 3   |
| CFAP36   | 112942 | Leukemia, MESH:D015470 | Arsenic Tr   | 19.96 | 19  |
| IGF1     | 3479   | Leukemia, MESH:D007948 | 2-(2-amin    | 19.96 | 3   |
| IL11RA   | 3590   | Leukemia, MESH:D015470 | Benzene C    | 19.96 | 28  |
| MIR574   | 693159 | Leukemia, MESH:D015470 | Doxorubic    | 19.96 | 14  |
| RBMXL1   | 494115 | Leukemia, MESH:D015470 | Calcitriol C | 19.96 | 12  |
| SHISAL1  | 85352  | Leukemia, MESH:D015470 | Doxorubic    | 19.96 | 12  |
| TGM4     | 7047   | Leukemia, MESH:D015473 | caffeic aci  | 19.96 | 153 |
| TMEM8B   | 51754  | Leukemia, MESH:D015470 | Doxorubic    | 19.96 | 12  |
| ZNF436   | 80818  | Leukemia, MESH:D015470 | Dexameth     | 19.96 | 12  |
| IFNB1    | 3456   | Leukemia, MESH:D015473 | alvocidib    | 19.95 | 264 |
| CSRP1    | 1465   | Leukemia, MESH:D015473 | Arsenic Tr   | 19.94 | 267 |
| ENO3     | 2027   | Leukemia, MESH:D015473 | Arsenic Cy   | 19.94 | 22  |
| CAMK2A   | 815    | Leukemia, MESH:D007948 | Arsenic Tr   | 19.93 | 3   |
| PIMREG   | 54478  | Leukemia, MESH:D015473 | arsenite C   | 19.93 | 155 |
| POLQ     | 10721  | Leukemia, MESH:D015473 | arsenite C   | 19.93 | 10  |
| ARF3     | 377    | Leukemia, MESH:D015470 | Dexameth     | 19.92 | 13  |
| ARSA     | 410    | Leukemia, MESH:D015470 | Calcitriol C | 19.92 | 17  |
| ASRGL1   | 80150  | Leukemia, MESH:D015473 | Arsenic Tr   | 19.92 | 156 |
| C4A      | 720    | Leukemia, MESH:D015470 | Dexameth     | 19.92 | 13  |
| CAMK2A   | 815    | Leukemia, MESH:D015470 | Arsenic Tr   | 19.92 | 19  |
| CDC37    | 11140  | Leukemia, MESH:D015470 | Arsenic Tr   | 19.92 | 34  |
| CDC42SE1 | 56882  | Leukemia, MESH:D015470 | Dexameth     | 19.92 | 12  |
| CKAP2L   | 150468 | Leukemia, MESH:D015473 | arsenite C   | 19.92 | 157 |
| CUBN     | 8029   | Leukemia, MESH:D015470 | Dexameth     | 19.92 | 12  |
| EDA2R    | 60401  | Leukemia, MESH:D015470 | Arsenic Tr   | 19.92 | 20  |
| ERC1     | 23085  | Leukemia, MESH:D015470 | Arsenic Tr   | 19.92 | 22  |
| G3BP2    | 9908   | Leukemia, MESH:D015470 | Air Polluta  | 19.92 | 14  |
| GBA      | 2629   | Leukemia, MESH:D015470 | Alitretinoi  | 19.92 | 21  |
| IKZF2    | 22807  | Leukemia, MESH:D015470 | (+)-JQ1 c    | 19.92 | 13  |
| KANK4    | 163782 | Leukemia, MESH:D015473 | Arsenic Tr   | 19.92 | 265 |
| LAP3     | 51056  | Leukemia, MESH:D015473 | Arsenic Ar   | 19.92 | 265 |
| LMOD1    | 25802  | Leukemia, MESH:D015470 | Arsenic Tr   | 19.92 | 20  |
| MITF     | 4286   | Leukemia, MESH:D015470 | Alitretinoi  | 19.92 | 33  |
| MUC4     | 4585   | Leukemia, MESH:D015470 | Decitabine   | 19.92 | 15  |
| N4BP2L2  | 10443  | Leukemia, MESH:D015473 | Arsenic De   | 19.92 | 160 |
| PARP8    | 79668  | Leukemia, MESH:D015470 | Calcitriol C | 19.92 | 9   |
| PRKAG1   | 5571   | Leukemia, MESH:D015470 | Decitabine   | 19.92 | 23  |
| RNASEL   | 6041   | Leukemia, MESH:D015470 | Air Polluta  | 19.92 | 14  |
| SBSPON   | 157869 | Leukemia, MESH:D015470 | Cytarabine   | 19.92 | 80  |
| SFRP4    | 6424   | Leukemia, MESH:D015473 | Arsenic ar   | 19.92 | 15  |
| SFXN4    | 119559 | Leukemia, MESH:D015470 | Doxorubic    | 19.92 | 13  |
| SMPD2    | 6610   | Leukemia, MESH:D015470 | Bezafibrat   | 19.92 | 17  |
| SSBP1    | 6742   | Leukemia, MESH:D015473 | Arsenic Ar   | 19.92 | 266 |
| STING1   | 340061 | Leukemia, MESH:D015470 | Dexameth     | 19.92 | 13  |
| TP53     | 7157   | Leukemia, MESH:D007948 | 2-(2-amin    | 19.92 | 4   |
| TSEN2    | 80746  | Leukemia, MESH:D015470 | Indometha    | 19.92 | 9   |
| TYRO3    | 7301   | Leukemia, MESH:D015473 | Dexameth     | 19.92 | 157 |
| USPL1    | 10208  | Leukemia, MESH:D015470 | Dexameth     | 19.92 | 13  |
| HSPA12A  | 259217 | Leukemia, MESH:D015473 | Arsenic ar   | 19.91 | 158 |
| MYO1D    | 4642   | Leukemia, MESH:D015473 | Arsenic Ca   | 19.91 | 157 |

|         |        |                            |              |       |     |
|---------|--------|----------------------------|--------------|-------|-----|
| SLC43A1 | 8501   | Leukemia, MESH:D015473     | Arsenic Ar   | 19.91 | 264 |
| VANGL1  | 81839  | Leukemia, MESH:D015470     | Arsenic Tr   | 19.91 | 19  |
| HSPA9   | 3313   | Leukemia, MESH:D015473     | Arsenic Ar   | 19.9  | 266 |
| MAFB    | 9935   | Leukemia, MESH:D015473     | Arsenic Ar   | 19.9  | 158 |
| STC1    | 6781   | Leukemia, MESH:D015473     | Arsenic Ar   | 19.9  | 160 |
| CACNA1A | 773    | Leukemia, MESH:D015470     | Arsenic Tr   | 19.89 | 17  |
| FBXO30  | 84085  | Leukemia, MESH:D015470     | Arsenic Tr   | 19.89 | 22  |
| VKORC1  | 79001  | Leukemia, MESH:D015470     | Dexameth     | 19.89 | 23  |
| FGF2    | 2247   | Leukemia, MESH:D015473     | Arsenic Ar   | 19.88 | 266 |
| GSTT1   | 2952   | Leukemia, MESH:D015470     | Arsenic Tr   | 19.88 | 35  |
| GRN     | 2896   | Leukemia, MESH:D007948     | 2-(2-amin    | 19.87 | 3   |
| MMP12   | 4321   | Leukemia, MESH:D007948     | 2-(2-amin    | 19.87 | 2   |
| CDK9    | 1025   | Leukemia, MESH:D015473     | alvocidib    | 19.86 | 155 |
| GJB1    | 2705   | Leukemia, MESH:D015473     | caffeic aci  | 19.86 | 152 |
| HSPB1   | 3315   | Leukemia, MESH:D015473     | Arsenic Tr   | 19.86 | 263 |
| LIPG    | 9388   | Leukemia, MESH:D015473     | Arsenic Ca   | 19.86 | 17  |
| TKT     | 7086   | Leukemia, MESH:D015470     | Arsenic Tr   | 19.86 | 35  |
| ALDH1A2 | 8854   | Leukemia, MESH:D015473     | arsenite ca  | 19.85 | 157 |
| BORA    | 79866  | Leukemia, MESH:D015473     | Arsenic Cy   | 19.85 | 160 |
| COBLL1  | 22837  | Leukemia, MESH:D015473     | Arsenic Tr   | 19.85 | 263 |
| FANCG   | 2189   | Leukemia, MESH:D015473     | Calcitriol C | 19.85 | 11  |
| IL10RB  | 3588   | Leukemia, MESH:D015473     | Arsenic De   | 19.85 | 160 |
| OAS3    | 4940   | Leukemia, MESH:D015473     | Arsenic Ar   | 19.85 | 157 |
| SLC1A4  | 6509   | Leukemia, MESH:D015473     | arsenite D   | 19.85 | 157 |
| SQSTM1  | 8878   | Leukemia, MESH:D007948     | 2-(2-amin    | 19.85 | 3   |
| TIPIN   | 54962  | Leukemia, MESH:D015473     | arsenite D   | 19.85 | 156 |
| VCL     | 7414   | Leukemia, MESH:D015473     | Arsenic De   | 19.85 | 158 |
| COX7B   | 1349   | Leukemia, MESH:D015473     | Arsenic Tr   | 19.84 | 263 |
| EIF4G2  | 1982   | Leukemia, MESH:D015473     | Arsenic Tr   | 19.84 | 262 |
| GALM    | 130589 | Leukemia, MESH:D015473     | Arsenic Tr   | 19.84 | 261 |
| SCNN1B  | 6338   | Leukemia, MESH:D015473     | Arsenic Tr   | 19.84 | 156 |
| EN2     | 2020   | Leukemia, MESH:D015473     | Etoposide    | 19.83 | 154 |
| ACSM3   | 6296   | Leukemia, MESH:D015470     | Dexameth     | 19.82 | 16  |
| ARPP19  | 10776  | Leukemia, MESH:D015470     | Arsenic Tr   | 19.82 | 20  |
| ATP7B   | 540    | Leukemia, MESH:D015473     | Buthionine   | 19.82 | 156 |
| LTA     | 4049   | Leukemia, MESH:D015470     | Arsenic Tr   | 19.82 | 21  |
| PSME1   | 5720   | Leukemia, MESH:D015470     | Decitabine   | 19.82 | 22  |
| TPM2    | 7169   | Leukemia, MESH:D015470     | Azacitidine  | 19.82 | 24  |
| SPI1    | 6688   | Leukemia, MESH:D01marker/m | Arsenic Tr   | 19.81 | 24  |
| ACLY    | 47     | Leukemia, MESH:D015470     | Benzene C    | 19.81 | 34  |
| APP     | 351    | Leukemia, MESH:D007948     | 2-(2-amin    | 19.81 | 3   |
| ART3    | 419    | Leukemia, MESH:D015470     | Dexameth     | 19.81 | 18  |
| ATAD5   | 79915  | Leukemia, MESH:D015470     | Calcitriol C | 19.81 | 9   |
| CDK19   | 23097  | Leukemia, MESH:D015470     | Doxorubic    | 19.81 | 17  |
| CIART   | 148523 | Leukemia, MESH:D015470     | Doxorubic    | 19.81 | 14  |
| CYP20A1 | 57404  | Leukemia, MESH:D015470     | Decitabine   | 19.81 | 16  |
| FAT3    | 120114 | Leukemia, MESH:D015470     | Decitabine   | 19.81 | 22  |
| FCHSD2  | 9873   | Leukemia, MESH:D015470     | Benzene C    | 19.81 | 28  |
| GLIS3   | 169792 | Leukemia, MESH:D015470     | Doxorubic    | 19.81 | 14  |
| GNL3L   | 54552  | Leukemia, MESH:D015470     | Dexameth     | 19.81 | 13  |
| HAS1    | 3036   | Leukemia, MESH:D015470     | Benzene C    | 19.81 | 30  |
| HMGN5   | 79366  | Leukemia, MESH:D015470     | Decitabine   | 19.81 | 18  |
| KCNG1   | 3755   | Leukemia, MESH:D015470     | Arsenic Tr   | 19.81 | 15  |
| KRCC1   | 51315  | Leukemia, MESH:D015470     | Air Polluta  | 19.81 | 19  |
| NCK2    | 8440   | Leukemia, MESH:D015470     | Daunorub     | 19.81 | 45  |
| OBSCN   | 84033  | Leukemia, MESH:D015470     | Bortezomi    | 19.81 | 14  |
| PCBD1   | 5092   | Leukemia, MESH:D015470     | Arsenic Tr   | 19.81 | 19  |
| PLA2G2A | 5320   | Leukemia, MESH:D015473     | caffeic aci  | 19.81 | 155 |

|          |        |                            |              |       |     |
|----------|--------|----------------------------|--------------|-------|-----|
| PLIN2    | 123    | Leukemia, MESH:D015473     | Arsenic Ar   | 19.81 | 264 |
| PREB     | 10113  | Leukemia, MESH:D015470     | Dexameth     | 19.81 | 14  |
| RRP9     | 9136   | Leukemia, MESH:D015470     | Arsenic Tr   | 19.81 | 20  |
| RUNX1    | 861    | Leukemia, MESH:D015473     | arsenite C   | 19.81 | 159 |
| RYR3     | 6263   | Leukemia, MESH:D015470     | Arsenic Tr   | 19.81 | 19  |
| SMYD2    | 56950  | Leukemia, MESH:D015470     | Decitabine   | 19.81 | 20  |
| SNX5     | 27131  | Leukemia, MESH:D015470     | Dexameth     | 19.81 | 14  |
| ST6GALN4 | 10610  | Leukemia, MESH:D015470     | Calcitriol E | 19.81 | 22  |
| STOM     | 2040   | Leukemia, MESH:D004915     | Cytarabine   | 19.81 | 3   |
| TBC1D5   | 9779   | Leukemia, MESH:D015470     | Dexameth     | 19.81 | 11  |
| TTYH2    | 94015  | Leukemia, MESH:D015470     | Doxorubic    | 19.81 | 17  |
| DALRD3   | 55152  | Leukemia, MESH:D015470     | Cytarabine   | 19.8  | 76  |
| HENMT1   | 113802 | Leukemia, MESH:D015473     | Arsenic Ar   | 19.8  | 261 |
| PODN     | 127435 | Leukemia, MESH:D015470     | Calcitriol E | 19.8  | 9   |
| RECQL5   | 9400   | Leukemia, MESH:D015470     | Cytarabine   | 19.8  | 87  |
| SNHG15   | 285958 | Leukemia, MESH:D015470     | Doxorubic    | 19.8  | 13  |
| AP5S1    | 55317  | Leukemia, MESH:D015470     | Methotrex    | 19.79 | 11  |
| DNAAF11  | 23639  | Leukemia, MESH:D015470     | Dexameth     | 19.79 | 7   |
| DNAJC4   | 3338   | Leukemia, MESH:D015470     | Bortezomi    | 19.79 | 14  |
| H3C7     | 8968   | Leukemia, MESH:D015470     | Dexameth     | 19.79 | 17  |
| KIF24    | 347240 | Leukemia, MESH:D015470     | Calcitriol ( | 19.79 | 9   |
| POM121   | 9883   | Leukemia, MESH:D015470     | Dexameth     | 19.79 | 12  |
| PRPF40B  | 25766  | Leukemia, MESH:D015470     | Dexameth     | 19.79 | 12  |
| RNF185   | 91445  | Leukemia, MESH:D015470     | Calcitriol E | 19.79 | 13  |
| RTL8A    | 26071  | Leukemia, MESH:D015470     | Dexameth     | 19.79 | 12  |
| SLC27A6  | 28965  | Leukemia, MESH:D015470     | Dexameth     | 19.79 | 10  |
| SLC35A2  | 7355   | Leukemia, MESH:D015470     | Dexameth     | 19.79 | 14  |
| TGFBRAP1 | 9392   | Leukemia, MESH:D015470     | Dronabinc    | 19.79 | 8   |
| ZBTB34   | 403341 | Leukemia, MESH:D015470     | Decitabine   | 19.79 | 21  |
| CAPN2    | 824    | Leukemia, MESH:D007948     | 2-(2-amin    | 19.78 | 2   |
| EIF3A    | 8661   | Leukemia, MESH:D004915     | Doxorubic    | 19.78 | 3   |
| HJURP    | 55355  | Leukemia, MESH:D015473     | Arsenic Ca   | 19.78 | 158 |
| PRRC2C   | 23215  | Leukemia, MESH:D015473     | Arsenic Tr   | 19.78 | 267 |
| CFL2     | 1073   | Leukemia, MESH:D015473     | arsenite D   | 19.77 | 157 |
| CYC1     | 1537   | Leukemia, MESH:D015473     | Arsenic Ar   | 19.77 | 266 |
| DUSP16   | 80824  | Leukemia, MESH:D015473     | Arsenic Ar   | 19.77 | 266 |
| EEPD1    | 80820  | Leukemia, MESH:D015473     | Arsenic Ca   | 19.77 | 157 |
| LIMCH1   | 22998  | Leukemia, MESH:D004915     | Cytarabine   | 19.77 | 3   |
| RAD54B   | 25788  | Leukemia, MESH:D015473     | Arsenic Tr   | 19.77 | 261 |
| RHBDF1   | 64285  | Leukemia, MESH:D015473     | Arsenic De   | 19.77 | 158 |
| PPP3CA   | 5530   | Leukemia, MESH:D015473     | Arsenic Tr   | 19.76 | 261 |
| APOB     | 338    | Leukemia, MESH:D015473     | alpha-Toc    | 19.75 | 20  |
| F5       | 2153   | Leukemia, MESH:D015470     | Arsenic Tr   | 19.75 | 30  |
| FDXR     | 2232   | Leukemia, MESH:D015470     | Daunorub     | 19.75 | 46  |
| HEXB     | 3074   | Leukemia, MESH:D015470     | Decitabine   | 19.75 | 24  |
| HOXA1    | 3198   | Leukemia, MESH:D015470     | Azacitidin   | 19.75 | 14  |
| HTR2B    | 3357   | Leukemia, MESH:D015470     | Bortezomi    | 19.75 | 13  |
| SVIL     | 6840   | Leukemia, MESH:D01marker/m | Decitabine   | 19.74 | 23  |
| FERMT2   | 10979  | Leukemia, MESH:D015470     | Arsenic Tr   | 19.74 | 23  |
| PDLIM7   | 9260   | Leukemia, MESH:D015470     | Arsenic Tr   | 19.74 | 18  |
| CYP1A2   | 1544   | Leukemia, MESH:D015473     | alpha-Toc    | 19.73 | 164 |
| ACSL1    | 2180   | Leukemia, MESH:D015473     | Antimony     | 19.72 | 262 |
| FDPS     | 2224   | Leukemia, MESH:D015470     | Androgen     | 19.72 | 38  |
| GRIN2B   | 2904   | Leukemia, MESH:D015470     | Azacitidin   | 19.72 | 29  |
| ADH1B    | 125    | Leukemia, MESH:D015470     | Arsenic Tr   | 19.71 | 17  |
| BMP5     | 653    | Leukemia, MESH:D015473     | Arsenic ar   | 19.71 | 22  |
| CD28     | 940    | Leukemia, MESH:D015473     | Calcitriol E | 19.71 | 8   |
| CD3E     | 916    | Leukemia, MESH:D015470     | Benzene C    | 19.71 | 23  |

|           |          |                        |              |       |     |
|-----------|----------|------------------------|--------------|-------|-----|
| CDK5RAP1  | 80279    | Leukemia, MESH:D015470 | Dexameth     | 19.71 | 10  |
| CPPED1    | 55313    | Leukemia, MESH:D015470 | Air Polluta  | 19.71 | 11  |
| CREBZF    | 58487    | Leukemia, MESH:D015470 | Pentachlo    | 19.71 | 15  |
| DKK2      | 27123    | Leukemia, MESH:D015470 | Decitabine   | 19.71 | 20  |
| DNM3      | 26052    | Leukemia, MESH:D015470 | Arsenic Tr   | 19.71 | 14  |
| GABPB1    | 2553     | Leukemia, MESH:D015470 | Decitabine   | 19.71 | 21  |
| GPC4      | 2239     | Leukemia, MESH:D015473 | Arsenic Ar   | 19.71 | 265 |
| GPSM2     | 29899    | Leukemia, MESH:D015473 | arsenite Ci  | 19.71 | 10  |
| HLA-DMA   | 3108     | Leukemia, MESH:D015470 | Air Polluta  | 19.71 | 9   |
| MAN1C1    | 57134    | Leukemia, MESH:D015470 | Arsenic Tr   | 19.71 | 19  |
| MGARP     | 84709    | Leukemia, MESH:D015470 | Cytarabine   | 19.71 | 77  |
| MIDN      | 90007    | Leukemia, MESH:D015470 | Doxorubic    | 19.71 | 15  |
| MXRA8     | 54587    | Leukemia, MESH:D015470 | Calcitriol C | 19.71 | 14  |
| NEIL1     | 79661    | Leukemia, MESH:D015470 | Decitabine   | 19.71 | 21  |
| NLRP12    | 91662    | Leukemia, MESH:D015470 | Air Polluta  | 19.71 | 16  |
| NRARP     | 441478   | Leukemia, MESH:D015470 | Calcitriol ( | 19.71 | 10  |
| SEMA3A    | 10371    | Leukemia, MESH:D015473 | Arsenic Ar   | 19.71 | 159 |
| SGPP1     | 81537    | Leukemia, MESH:D015470 | Bortezomi    | 19.71 | 15  |
| SLC29A2   | 3177     | Leukemia, MESH:D015470 | Azacitidine  | 19.71 | 24  |
| SLC9A3R2  | 9351     | Leukemia, MESH:D015470 | Doxorubic    | 19.71 | 17  |
| SNRPE     | 6635     | Leukemia, MESH:D015470 | Arsenic Tr   | 19.71 | 21  |
| TAF15     | 8148     | Leukemia, MESH:D015470 | Arsenic Tr   | 19.71 | 19  |
| TMC5      | 79838    | Leukemia, MESH:D015470 | Arsenic Tr   | 19.71 | 14  |
| TMED9     | 54732    | Leukemia, MESH:D015470 | Cytarabine   | 19.71 | 80  |
| TRANK1    | 9881     | Leukemia, MESH:D015470 | Air Polluta  | 19.71 | 14  |
| TSPAN3    | 10099    | Leukemia, MESH:D015470 | Arsenic Tr   | 19.71 | 21  |
| TTLL7     | 79739    | Leukemia, MESH:D015470 | Arsenic Tr   | 19.71 | 19  |
| ADGRF5    | 221395   | Leukemia, MESH:D015470 | Arsenic Tr   | 19.7  | 19  |
| CSNK1D    | 1453     | Leukemia, MESH:D015473 | Arsenic Ar   | 19.7  | 268 |
| EFNB1     | 1947     | Leukemia, MESH:D015473 | Arsenic ars  | 19.7  | 157 |
| EIF4E     | 1977     | Leukemia, MESH:D007948 | 2-(2-amin    | 19.7  | 3   |
| HADHA     | 3030     | Leukemia, MESH:D015470 | Allopurinc   | 19.7  | 20  |
| MYOD1     | 4654     | Leukemia, MESH:D015473 | arsenite D   | 19.7  | 157 |
| PSMD8     | 5714     | Leukemia, MESH:D015473 | Arsenic Ar   | 19.7  | 265 |
| PTGER4    | 5734     | Leukemia, MESH:D015470 | Calcitriol C | 19.7  | 19  |
| RAPH1     | 65059    | Leukemia, MESH:D015473 | Arsenic Tr   | 19.7  | 264 |
| RBMS1     | 5937     | Leukemia, MESH:D015473 | Arsenic Ge   | 19.7  | 157 |
| SEC23B    | 10483    | Leukemia, MESH:D015473 | Arsenic ars  | 19.7  | 12  |
| DNM3OS    | 1.01E+08 | Leukemia, MESH:D015470 | Arsenic Tr   | 19.69 | 12  |
| PRR3      | 80742    | Leukemia, MESH:D015473 | Arsenic Tr   | 19.69 | 260 |
| ALB       | 213      | Leukemia, MESH:D015473 | alpha-Toc    | 19.68 | 265 |
| BNIP3     | 664      | Leukemia, MESH:D015473 | Arsenic Tr   | 19.68 | 263 |
| HMMR      | 3161     | Leukemia, MESH:D015473 | arsenite Ci  | 19.68 | 157 |
| LINC00171 | 1E+08    | Leukemia, MESH:D015470 | Decitabine   | 19.68 | 13  |
| MIR16-1   | 406950   | Leukemia, MESH:D015470 | Arsenic Tr   | 19.68 | 14  |
| OIP5-AS1  | 729082   | Leukemia, MESH:D015470 | Dexameth     | 19.68 | 13  |
| PLG       | 5340     | Leukemia, MESH:D015473 | alpha-Toc    | 19.68 | 168 |
| VCAN      | 1462     | Leukemia, MESH:D015473 | arsenite Ci  | 19.68 | 157 |
| ZNF638    | 27332    | Leukemia, MESH:D015473 | arsenite D   | 19.68 | 7   |
| ACP5      | 54       | Leukemia, MESH:D015473 | caffeic aci  | 19.67 | 156 |
| AIM2      | 9447     | Leukemia, MESH:D015473 | Arsenic M    | 19.67 | 155 |
| BCL10     | 8915     | Leukemia, MESH:D015470 | Arsenic Tr   | 19.67 | 22  |
| CDK5      | 1020     | Leukemia, MESH:D015470 | alvocidib    | 19.67 | 22  |
| CRIP2     | 1397     | Leukemia, MESH:D015470 | Bortezomi    | 19.67 | 24  |
| FOXQ1     | 94234    | Leukemia, MESH:D015470 | Calcitriol C | 19.67 | 10  |
| GPATCH1   | 253635   | Leukemia, MESH:D015473 | arsenite D   | 19.67 | 155 |
| GPRC5A    | 9052     | Leukemia, MESH:D015470 | Arsenic Tr   | 19.67 | 26  |
| MED1      | 5469     | Leukemia, MESH:D015470 | 15-deoxy-    | 19.67 | 21  |

|           |        |                            |              |       |     |
|-----------|--------|----------------------------|--------------|-------|-----|
| SERPINA3  | 12     | Leukemia, MESH:D015470     | Alitretinoin | 19.67 | 11  |
| SLC16A2   | 6567   | Leukemia, MESH:D015470     | Dasatinib    | 19.67 | 16  |
| TNS3      | 64759  | Leukemia, MESH:D015470     | Dasatinib    | 19.67 | 10  |
| ZNF267    | 10308  | Leukemia, MESH:D015473     | Arsenic De   | 19.67 | 159 |
| AIM2      | 9447   | Leukemia, MESH:D015470     | Air Polluta  | 19.65 | 14  |
| KRT18     | 3875   | Leukemia, MESH:D015473     | Arsenic Ar   | 19.65 | 264 |
| CS        | 1431   | Leukemia, MESH:D015473     | Arsenic ca   | 19.64 | 158 |
| EVL       | 51466  | Leukemia, MESH:D015473     | arsenic dis  | 19.64 | 261 |
| FOXO4     | 4303   | Leukemia, MESH:D015473     | Arsenic Tr   | 19.64 | 264 |
| MRM2      | 29960  | Leukemia, MESH:D015470     | Dronabinc    | 19.64 | 15  |
| MRPS5     | 64969  | Leukemia, MESH:D015470     | Bortezomi    | 19.64 | 8   |
| PTPRN     | 5798   | Leukemia, MESH:D015473     | arsenite Ci  | 19.64 | 159 |
| PTPRZ1    | 5803   | Leukemia, MESH:D015473     | arsenite Ci  | 19.64 | 158 |
| SOX21     | 11166  | Leukemia, MESH:D015470     | Cytarabine   | 19.64 | 81  |
| ULBP2     | 80328  | Leukemia, MESH:D015470     | Arsenic Tr   | 19.64 | 23  |
| AHSA2P    | 130872 | Leukemia, MESH:D015470     | Arsenic Tr   | 19.63 | 17  |
| BICRAL    | 23506  | Leukemia, MESH:D015470     | Dexameth     | 19.63 | 8   |
| C6ORF141  | 135398 | Leukemia, MESH:D015470     | Decitabine   | 19.63 | 14  |
| CDIN1     | 84529  | Leukemia, MESH:D015470     | Doxorubic    | 19.63 | 13  |
| CPLANE1   | 65250  | Leukemia, MESH:D015470     | Doxorubic    | 19.63 | 13  |
| DNAJC27   | 51277  | Leukemia, MESH:D015470     | Decitabine   | 19.63 | 19  |
| EIF4ENIF1 | 56478  | Leukemia, MESH:D015470     | Benzene C    | 19.63 | 22  |
| FOXN2     | 3344   | Leukemia, MESH:D015470     | Dexameth     | 19.63 | 13  |
| GDF10     | 2662   | Leukemia, MESH:D015473     | Arsenic De   | 19.63 | 156 |
| GPN1      | 11321  | Leukemia, MESH:D015470     | Arsenic Tr   | 19.63 | 18  |
| GRN       | 2896   | Leukemia, MESH:D015473     | Arsenic Tr   | 19.63 | 265 |
| H2BC21    | 8349   | Leukemia, MESH:D015473     | Dexameth     | 19.63 | 156 |
| HSD17B7   | 51478  | Leukemia, MESH:D015473     | Antimony     | 19.63 | 160 |
| ICA1L     | 130026 | Leukemia, MESH:D015470     | Doxorubic    | 19.63 | 13  |
| KIAA0930  | 23313  | Leukemia, MESH:D015470     | Air Polluta  | 19.63 | 18  |
| MIR100HC  | 399959 | Leukemia, MESH:D015470     | Calcitriol C | 19.63 | 12  |
| MKS1      | 54903  | Leukemia, MESH:D015470     | Calcitriol C | 19.63 | 8   |
| NOL12     | 79159  | Leukemia, MESH:D015470     | Doxorubic    | 19.63 | 16  |
| RRM1      | 6240   | Leukemia, MESH:D015473     | Arsenic Tr   | 19.63 | 263 |
| S100B     | 6285   | Leukemia, MESH:D015473     | Arsenic Tr   | 19.63 | 260 |
| SACS      | 26278  | Leukemia, MESH:D015473     | Arsenic Tr   | 19.63 | 265 |
| SH3BGRL   | 6451   | Leukemia, MESH:D015473     | Arsenic Tr   | 19.63 | 262 |
| SLC35A4   | 113829 | Leukemia, MESH:D015470     | Dronabinc    | 19.63 | 10  |
| SLC6A6    | 6533   | Leukemia, MESH:D015473     | Arsenic De   | 19.63 | 158 |
| SNX21     | 90203  | Leukemia, MESH:D015470     | Doxorubic    | 19.63 | 14  |
| TLL2      | 7093   | Leukemia, MESH:D015470     | Arsenic Tr   | 19.63 | 15  |
| TRAPPC4   | 51399  | Leukemia, MESH:D015470     | Arsenic Tr   | 19.63 | 19  |
| TSPAN11   | 441631 | Leukemia, MESH:D015470     | Dexameth     | 19.63 | 15  |
| UBE3A     | 7337   | Leukemia, MESH:D015473     | Arsenic Tr   | 19.63 | 263 |
| UPP1      | 7378   | Leukemia, MESH:D015473     | Arsenic Ar   | 19.63 | 264 |
| ZNF267    | 10308  | Leukemia, MESH:D015470     | Air Polluta  | 19.63 | 8   |
| ZNF638    | 27332  | Leukemia, MESH:D015470     | Dexameth     | 19.63 | 11  |
| BAALC     | 79870  | Leukemia, MESH:D01marker/m | Arsenic Tr   | 19.62 | 19  |
| CHEK2     | 11200  | Leukemia, MESH:D015473     | Arsenic Tr   | 19.62 | 159 |
| PKM       | 5315   | Leukemia, MESH:D015473     | Arsenic Ar   | 19.62 | 266 |
| ADIPOR1   | 51094  | Leukemia, MESH:D015470     | Alitretinoin | 19.61 | 13  |
| AFAP1L2   | 84632  | Leukemia, MESH:D015470     | Cytarabine   | 19.61 | 87  |
| ALPP      | 250    | Leukemia, MESH:D015470     | Arsenic Tr   | 19.61 | 31  |
| CACNA2D   | 9254   | Leukemia, MESH:D015470     | Arsenic Tr   | 19.61 | 52  |
| CORO6     | 84940  | Leukemia, MESH:D015470     | Arsenic Tr   | 19.61 | 18  |
| CPEB1     | 64506  | Leukemia, MESH:D015470     | Arsenic Tr   | 19.61 | 22  |
| DUSP7     | 1849   | Leukemia, MESH:D015470     | Air Polluta  | 19.61 | 21  |
| FBXL4     | 26235  | Leukemia, MESH:D015470     | Arsenic Tr   | 19.61 | 17  |

|          |        |                        |              |       |     |
|----------|--------|------------------------|--------------|-------|-----|
| GALNT7   | 51809  | Leukemia, MESH:D015470 | Dexameth     | 19.61 | 10  |
| GTF2B    | 2959   | Leukemia, MESH:D015470 | Cyclophos    | 19.61 | 14  |
| IL20RB   | 53833  | Leukemia, MESH:D015470 | Arsenic Tr   | 19.61 | 21  |
| NEO1     | 4756   | Leukemia, MESH:D015470 | Arsenic Tr   | 19.61 | 16  |
| PDLIM4   | 8572   | Leukemia, MESH:D015470 | Cytarabine   | 19.61 | 87  |
| POLR3K   | 51728  | Leukemia, MESH:D015470 | Dronabinc    | 19.61 | 10  |
| RAPGEF5  | 9771   | Leukemia, MESH:D015470 | Arsenic Tr   | 19.61 | 20  |
| SARAF    | 51669  | Leukemia, MESH:D015470 | Benzene C    | 19.61 | 95  |
| SELENOS  | 55829  | Leukemia, MESH:D015470 | Decitabine   | 19.61 | 14  |
| SEPTIN6  | 23157  | Leukemia, MESH:D015470 | Arsenic Tr   | 19.61 | 23  |
| SNCG     | 6623   | Leukemia, MESH:D015470 | Calcitriol C | 19.61 | 17  |
| SOS2     | 6655   | Leukemia, MESH:D015470 | Benzene C    | 19.61 | 28  |
| WDR33    | 55339  | Leukemia, MESH:D015470 | Decitabine   | 19.61 | 23  |
| ZSWIM6   | 57688  | Leukemia, MESH:D015470 | Air Polluta  | 19.61 | 14  |
| BRD2     | 6046   | Leukemia, MESH:D015470 | Doxorubic    | 19.6  | 16  |
| CFI      | 3426   | Leukemia, MESH:D015470 | Arsenic Tr   | 19.6  | 20  |
| DNAJB5   | 25822  | Leukemia, MESH:D015470 | Dexameth     | 19.6  | 16  |
| EIF4G3   | 8672   | Leukemia, MESH:D015470 | Dexameth     | 19.6  | 14  |
| GYG1     | 2992   | Leukemia, MESH:D015470 | Dexameth     | 19.6  | 14  |
| HDAC6    | 10013  | Leukemia, MESH:D015470 | Bortezomi    | 19.6  | 18  |
| IDE      | 3416   | Leukemia, MESH:D015470 | Bortezomi    | 19.6  | 20  |
| NOL8     | 55035  | Leukemia, MESH:D015470 | Dexameth     | 19.6  | 15  |
| PCDH8    | 5100   | Leukemia, MESH:D015470 | Dexameth     | 19.6  | 14  |
| PGAP2    | 27315  | Leukemia, MESH:D015470 | Doxorubic    | 19.6  | 14  |
| PRICKLE2 | 166336 | Leukemia, MESH:D015470 | Calcitriol C | 19.6  | 9   |
| RALB     | 5899   | Leukemia, MESH:D015470 | Decitabine   | 19.6  | 20  |
| RAPGEF4  | 11069  | Leukemia, MESH:D015470 | Arsenic Tr   | 19.6  | 34  |
| RELA     | 5970   | Leukemia, MESH:D007948 | 2-(2-amin    | 19.6  | 4   |
| TENT5B   | 115572 | Leukemia, MESH:D015470 | Calcitriol C | 19.6  | 13  |
| ZCCHC24  | 219654 | Leukemia, MESH:D015470 | Dronabinc    | 19.6  | 9   |
| RORC     | 6097   | Leukemia, MESH:D015473 | Arsenic Bu   | 19.59 | 13  |
| SLC3A2   | 6520   | Leukemia, MESH:D015473 | Arsenic Ar   | 19.59 | 162 |
| ALOX12   | 239    | Leukemia, MESH:D015473 | Calcitriol C | 19.58 | 8   |
| SERPINE1 | 5054   | Leukemia, MESH:D007948 | 2-(2-amin    | 19.58 | 3   |
| ARL4C    | 10123  | Leukemia, MESH:D015473 | Arsenic Ar   | 19.57 | 266 |
| CENPI    | 2491   | Leukemia, MESH:D015473 | Calcitriol C | 19.57 | 153 |
| RAB20    | 55647  | Leukemia, MESH:D015473 | Dexameth     | 19.57 | 154 |
| SATB2    | 23314  | Leukemia, MESH:D015473 | Arsenic Tr   | 19.57 | 264 |
| TMEM200  | 114801 | Leukemia, MESH:D015473 | Calcitriol C | 19.57 | 15  |
| TNFSF14  | 8740   | Leukemia, MESH:D015473 | Arsenic Tr   | 19.57 | 263 |
| XAF1     | 54739  | Leukemia, MESH:D015473 | Arsenic Tr   | 19.57 | 262 |
| EFHD2    | 79180  | Leukemia, MESH:D015473 | arsenite D   | 19.56 | 155 |
| GPX8     | 493869 | Leukemia, MESH:D015473 | arsenite C   | 19.56 | 157 |
| KIF18B   | 146909 | Leukemia, MESH:D015473 | Arsenic ar:  | 19.56 | 157 |
| MSI2     | 124540 | Leukemia, MESH:D015473 | Arsenic ar:  | 19.56 | 159 |
| PMS1     | 5378   | Leukemia, MESH:D015473 | Dexameth     | 19.56 | 156 |
| RPA3     | 6119   | Leukemia, MESH:D015473 | Arsenic Ar   | 19.56 | 264 |
| TNFRSF8  | 943    | Leukemia, MESH:D015473 | Arsenic Ar   | 19.56 | 264 |
| BCL3     | 602    | Leukemia, MESH:D015473 | Arsenic Tr   | 19.54 | 261 |
| DKK1     | 22943  | Leukemia, MESH:D015473 | Arsenic Tr   | 19.54 | 259 |
| RUSF1    | 64755  | Leukemia, MESH:D015473 | Arsenic Ar   | 19.54 | 263 |
| DDX3X    | 1654   | Leukemia, MESH:D015470 | Air Polluta  | 19.53 | 12  |
| DTL      | 51514  | Leukemia, MESH:D015470 | Arsenic Tr   | 19.53 | 23  |
| EGLN3    | 112399 | Leukemia, MESH:D015470 | Bortezomi    | 19.53 | 18  |
| FOXO3    | 2309   | Leukemia, MESH:D015473 | Arsenic Tr   | 19.53 | 263 |
| GUCY1B1  | 2983   | Leukemia, MESH:D015470 | Dexameth     | 19.53 | 26  |
| IL16     | 3603   | Leukemia, MESH:D015470 | Benzene C    | 19.53 | 26  |
| PRDX4    | 10549  | Leukemia, MESH:D015470 | Arsenic Tr   | 19.53 | 22  |

|          |        |                        |                  |       |     |
|----------|--------|------------------------|------------------|-------|-----|
| PTPN6    | 5777   | Leukemia, MESH:D015470 | Arsenic Tr       | 19.53 | 22  |
| SLC38A1  | 81539  | Leukemia, MESH:D015470 | Arsenic Tr       | 19.53 | 15  |
| SLC5A3   | 6526   | Leukemia, MESH:D015470 | Allopurinol      | 19.53 | 15  |
| CDH6     | 1004   | Leukemia, MESH:D015470 | Dexameth         | 19.51 | 14  |
| CTNND2   | 1501   | Leukemia, MESH:D015470 | Cyclophosphamide | 19.51 | 14  |
| DAGLB    | 221955 | Leukemia, MESH:D015470 | Dexameth         | 19.51 | 13  |
| GINS3    | 64785  | Leukemia, MESH:D015470 | Calcitriol       | 19.51 | 11  |
| LY6D     | 8581   | Leukemia, MESH:D015470 | Bezafibrate      | 19.51 | 14  |
| MKNK1    | 8569   | Leukemia, MESH:D015470 | Arsenic Tr       | 19.51 | 27  |
| NDUFS3   | 4722   | Leukemia, MESH:D015470 | Air Pollutants   | 19.51 | 15  |
| NFE2     | 4778   | Leukemia, MESH:D015473 | Aclarubicin      | 19.51 | 159 |
| NTHL1    | 4913   | Leukemia, MESH:D015470 | Bezafibrate      | 19.51 | 12  |
| PARP2    | 10038  | Leukemia, MESH:D015470 | Arsenic Tr       | 19.51 | 21  |
| POPDC2   | 64091  | Leukemia, MESH:D015470 | Arsenic Tr       | 19.51 | 19  |
| RPL36A   | 6173   | Leukemia, MESH:D015470 | Arsenic Tr       | 19.51 | 29  |
| SOCS5    | 9655   | Leukemia, MESH:D015470 | Bortezomib       | 19.51 | 10  |
| TSPAN2   | 10100  | Leukemia, MESH:D015470 | Dasatinib        | 19.51 | 9   |
| UGT1A4   | 54657  | Leukemia, MESH:D015470 | Indomethacin     | 19.51 | 11  |
| VPS13A   | 23230  | Leukemia, MESH:D015470 | Calcitriol       | 19.51 | 11  |
| XCL1     | 6375   | Leukemia, MESH:D015470 | Bortezomib       | 19.51 | 9   |
| ARHGEF28 | 64283  | Leukemia, MESH:D015470 | Calcitriol       | 19.5  | 14  |
| DYRK2    | 8445   | Leukemia, MESH:D015473 | Arsenic Tr       | 19.5  | 262 |
| FTO      | 79068  | Leukemia, MESH:D015470 | Dexameth         | 19.5  | 9   |
| IFI44L   | 10964  | Leukemia, MESH:D015473 | Arsenic          | 19.5  | 155 |
| KLHL29   | 114818 | Leukemia, MESH:D015470 | Dexameth         | 19.5  | 13  |
| MAN1A2   | 10905  | Leukemia, MESH:D015470 | Arsenic Tr       | 19.5  | 15  |
| MCOLN1   | 57192  | Leukemia, MESH:D015470 | Dexameth         | 19.5  | 9   |
| NME3     | 4832   | Leukemia, MESH:D015470 | Dexameth         | 19.5  | 13  |
| NRF1     | 4899   | Leukemia, MESH:D015473 | Arsenic          | 19.5  | 265 |
| NTRK3    | 4916   | Leukemia, MESH:D015473 | Arsenic          | 19.5  | 265 |
| PAPOLA   | 10914  | Leukemia, MESH:D015473 | Arsenic          | 19.5  | 159 |
| PAX3     | 5077   | Leukemia, MESH:D015473 | alpha-Tocopherol | 19.5  | 158 |
| PRPS1    | 5631   | Leukemia, MESH:D015473 | Arsenic          | 19.5  | 267 |
| SLC48A1  | 55652  | Leukemia, MESH:D015470 | Arsenic Tr       | 19.5  | 14  |
| TMEM117  | 84216  | Leukemia, MESH:D015470 | Calcitriol       | 19.5  | 11  |
| TMEM50B  | 757    | Leukemia, MESH:D015470 | Dexameth         | 19.5  | 14  |
| WDR77    | 79084  | Leukemia, MESH:D015470 | Arsenic Tr       | 19.5  | 19  |
| XRCC2    | 7516   | Leukemia, MESH:D015473 | Calcitriol       | 19.5  | 155 |
| ANO1     | 55107  | Leukemia, MESH:D015473 | Arsenic          | 19.49 | 158 |
| B4GALT5  | 9334   | Leukemia, MESH:D015473 | Arsenic Tr       | 19.49 | 262 |
| CDV3     | 55573  | Leukemia, MESH:D015473 | Arsenic Tr       | 19.49 | 263 |
| FRAS1    | 80144  | Leukemia, MESH:D015473 | arsenite         | 19.49 | 156 |
| HMG2     | 3151   | Leukemia, MESH:D015473 | Arsenic Tr       | 19.49 | 156 |
| MIR196B  | 442920 | Leukemia, MESH:D015470 | Air Pollutants   | 19.49 | 28  |
| MIR223   | 407008 | Leukemia, MESH:D015470 | Arsenic Tr       | 19.49 | 21  |
| PDX1     | 3651   | Leukemia, MESH:D015473 | Arsenic          | 19.49 | 160 |
| PTK6     | 5753   | Leukemia, MESH:D015470 | Arsenic Tr       | 19.49 | 28  |
| SUV39H1  | 6839   | Leukemia, MESH:D015473 | Arsenic          | 19.49 | 159 |
| TJP3     | 27134  | Leukemia, MESH:D015473 | Arsenic          | 19.49 | 13  |
| BIRC7    | 79444  | Leukemia, MESH:D015470 | Arsenic Tr       | 19.48 | 28  |
| MTIF3    | 219402 | Leukemia, MESH:D015470 | Decitabine       | 19.48 | 21  |
| PLEKHM2  | 23207  | Leukemia, MESH:D015470 | Arsenic Tr       | 19.48 | 14  |
| SFPQ     | 6421   | Leukemia, MESH:D015470 | Arsenic Tr       | 19.48 | 22  |
| ARNT     | 405    | Leukemia, MESH:D015470 | Deferoxamine     | 19.47 | 28  |
| CCDC14   | 64770  | Leukemia, MESH:D015470 | Calcitriol       | 19.47 | 14  |
| CHCHD4   | 131474 | Leukemia, MESH:D015470 | Doxorubicin      | 19.47 | 12  |
| LMLN     | 89782  | Leukemia, MESH:D015470 | Doxorubicin      | 19.47 | 12  |
| MPV17L2  | 84769  | Leukemia, MESH:D015470 | Dexameth         | 19.47 | 14  |



|         |        |                        |              |       |     |
|---------|--------|------------------------|--------------|-------|-----|
| PCNX2   | 80003  | Leukemia, MESH:D015470 | Dexameth     | 19.47 | 15  |
| PLAC1   | 10761  | Leukemia, MESH:D015470 | Arsenic Tr   | 19.47 | 13  |
| PLPPR4  | 9890   | Leukemia, MESH:D015470 | Doxorubic    | 19.47 | 15  |
| RUSF1   | 64755  | Leukemia, MESH:D015470 | Arsenic Tr   | 19.47 | 20  |
| SLC35C1 | 55343  | Leukemia, MESH:D015470 | Dexameth     | 19.47 | 12  |
| TMEM18  | 129787 | Leukemia, MESH:D015470 | Arsenic Tr   | 19.47 | 19  |
| ZNF394  | 84124  | Leukemia, MESH:D015470 | Doxorubic    | 19.47 | 13  |
| ATG7    | 10533  | Leukemia, MESH:D015473 | Arsenic ar   | 19.46 | 266 |
| CD63    | 967    | Leukemia, MESH:D015470 | Air Polluta  | 19.46 | 27  |
| ITGA5   | 3678   | Leukemia, MESH:D015473 | Arsenic De   | 19.46 | 158 |
| ITGA6   | 3655   | Leukemia, MESH:D015473 | Arsenic Tr   | 19.46 | 263 |
| TPM4    | 7171   | Leukemia, MESH:D015473 | Arsenic Tr   | 19.46 | 264 |
| VDAC2   | 7417   | Leukemia, MESH:D015470 | Arsenic Tr   | 19.46 | 20  |
| YARS1   | 8565   | Leukemia, MESH:D015470 | Dexameth     | 19.46 | 12  |
| ZNF473  | 25888  | Leukemia, MESH:D015470 | Dexameth     | 19.46 | 13  |
| PCNA    | 5111   | Leukemia, MESH:D007948 | 2-(2-amin    | 19.45 | 3   |
| IL12A   | 3592   | Leukemia, MESH:D015473 | Arsenic ar   | 19.44 | 158 |
| PSD3    | 23362  | Leukemia, MESH:D015473 | Arsenic Ar   | 19.44 | 267 |
| DSG1    | 1828   | Leukemia, MESH:D015473 | Antimony     | 19.43 | 13  |
| GAS6    | 2621   | Leukemia, MESH:D015470 | Decitabine   | 19.43 | 24  |
| GSPT1   | 2935   | Leukemia, MESH:D015473 | Arsenic Tr   | 19.43 | 262 |
| HPGD    | 3248   | Leukemia, MESH:D007948 | 2-(2-amin    | 19.43 | 3   |
| MTA1    | 9112   | Leukemia, MESH:D015473 | Arsenic Ar   | 19.43 | 268 |
| PIDD1   | 55367  | Leukemia, MESH:D015473 | Arsenic Ca   | 19.43 | 158 |
| POU2F1  | 5451   | Leukemia, MESH:D015473 | Arsenic Tr   | 19.43 | 263 |
| PRPS2   | 5634   | Leukemia, MESH:D015473 | Arsenic Tr   | 19.43 | 263 |
| SEL1L   | 6400   | Leukemia, MESH:D015473 | arsenite D   | 19.43 | 9   |
| SULT2B1 | 6820   | Leukemia, MESH:D015473 | Antimony     | 19.43 | 12  |
| TNFSF10 | 8743   | Leukemia, MESH:D004915 | Cytarabine   | 19.43 | 3   |
| TNFSF4  | 7292   | Leukemia, MESH:D015473 | Dexameth     | 19.43 | 154 |
| ADA     | 100    | Leukemia, MESH:D015473 | caffeic aci  | 19.42 | 157 |
| GSTM2   | 2946   | Leukemia, MESH:D015470 | Calcitriol C | 19.42 | 24  |
| NFKBIB  | 4793   | Leukemia, MESH:D015473 | Arsenic Tr   | 19.42 | 263 |
| PDIA4   | 9601   | Leukemia, MESH:D015473 | Antimony     | 19.42 | 160 |
| RBP1    | 5947   | Leukemia, MESH:D015473 | Arsenic Ar   | 19.42 | 264 |
| SPARCL1 | 8404   | Leukemia, MESH:D015473 | Arsenic Ca   | 19.42 | 157 |
| TENM3   | 55714  | Leukemia, MESH:D015473 | arsenite Ci  | 19.42 | 156 |
| ZSCAN31 | 64288  | Leukemia, MESH:D015473 | Arsenic Ar   | 19.42 | 266 |
| AFF1    | 4299   | Leukemia, MESH:D015470 | Bortezomi    | 19.41 | 15  |
| AMPD2   | 271    | Leukemia, MESH:D015470 | Benzene C    | 19.41 | 23  |
| ANXA13  | 312    | Leukemia, MESH:D015470 | Irinotecan   | 19.41 | 9   |
| CFD     | 1675   | Leukemia, MESH:D015473 | Arsenic Ar   | 19.41 | 265 |
| CSGALNA | 55790  | Leukemia, MESH:D015470 | Arsenic Tr   | 19.41 | 22  |
| CYBRD1  | 79901  | Leukemia, MESH:D015470 | Air Polluta  | 19.41 | 20  |
| EIF1AX  | 1964   | Leukemia, MESH:D015470 | Cyclophos    | 19.41 | 14  |
| FAM89A  | 375061 | Leukemia, MESH:D015470 | Dronabinc    | 19.41 | 9   |
| FNBP4   | 23360  | Leukemia, MESH:D015470 | Air Polluta  | 19.41 | 23  |
| FOLR2   | 2350   | Leukemia, MESH:D015470 | Air Polluta  | 19.41 | 11  |
| GAP43   | 2596   | Leukemia, MESH:D007948 | Arsenic Tr   | 19.41 | 4   |
| KLF5    | 688    | Leukemia, MESH:D007948 | 2-(2-amin    | 19.41 | 3   |
| MAD2L1B | 9587   | Leukemia, MESH:D015473 | arsenite M   | 19.41 | 156 |
| MCM8    | 84515  | Leukemia, MESH:D015470 | Calcitriol C | 19.41 | 19  |
| NCKAP1  | 10787  | Leukemia, MESH:D015470 | Arsenic Tr   | 19.41 | 15  |
| OSR1    | 130497 | Leukemia, MESH:D015470 | Cytarabine   | 19.41 | 82  |
| PIGH    | 5283   | Leukemia, MESH:D015473 | Arsenic Tr   | 19.41 | 263 |
| PLCB1   | 23236  | Leukemia, MESH:D015473 | Arsenic Ar   | 19.41 | 264 |
| POU3F1  | 5453   | Leukemia, MESH:D015470 | Calcitriol C | 19.41 | 9   |
| PTGR2   | 145482 | Leukemia, MESH:D015470 | Doxorubic    | 19.41 | 17  |

|          |        |                        |              |       |     |
|----------|--------|------------------------|--------------|-------|-----|
| SLC38A5  | 92745  | Leukemia, MESH:D015470 | Dexameth     | 19.41 | 12  |
| SOSTDC1  | 25928  | Leukemia, MESH:D015470 | Arsenic Tr   | 19.41 | 17  |
| STX11    | 8676   | Leukemia, MESH:D015470 | Benzene C    | 19.41 | 24  |
| TEAD4    | 7004   | Leukemia, MESH:D015470 | Calcitriol C | 19.41 | 14  |
| TRMT61A  | 115708 | Leukemia, MESH:D015470 | Arsenic Tr   | 19.41 | 14  |
| TSPAN33  | 340348 | Leukemia, MESH:D015470 | Benzene C    | 19.41 | 23  |
| WNT7B    | 7477   | Leukemia, MESH:D015470 | Calcitriol C | 19.41 | 15  |
| CNKSRR3  | 154043 | Leukemia, MESH:D015470 | Dexameth     | 19.4  | 14  |
| DCLRE1B  | 64858  | Leukemia, MESH:D015473 | Arsenic De   | 19.4  | 158 |
| EBF3     | 253738 | Leukemia, MESH:D015470 | Dexameth     | 19.4  | 14  |
| GATA4    | 2626   | Leukemia, MESH:D007948 | 2-(2-amin    | 19.4  | 3   |
| IL24     | 11009  | Leukemia, MESH:D007948 | 2-(2-amin    | 19.4  | 3   |
| MOB3B    | 79817  | Leukemia, MESH:D015470 | Dexameth     | 19.4  | 10  |
| MTUS1    | 57509  | Leukemia, MESH:D004915 | Cytarabine   | 19.4  | 2   |
| NAGLU    | 4669   | Leukemia, MESH:D015470 | Arsenic Tr   | 19.4  | 19  |
| SLC39A11 | 201266 | Leukemia, MESH:D015470 | Calcitriol C | 19.4  | 11  |
| AK1      | 203    | Leukemia, MESH:D015470 | Clioquinol   | 19.39 | 17  |
| BASP1    | 10409  | Leukemia, MESH:D015470 | Arsenic Tr   | 19.39 | 23  |
| KRT14    | 3861   | Leukemia, MESH:D015470 | Alitretinoin | 19.39 | 16  |
| PDK2     | 5164   | Leukemia, MESH:D015470 | Bezafibrat   | 19.39 | 18  |
| PRKACA   | 5566   | Leukemia, MESH:D015473 | arsenite ca  | 19.38 | 13  |
| PSMG3-A  | 114796 | Leukemia, MESH:D015470 | Dexameth     | 19.38 | 11  |
| RTL10    | 79680  | Leukemia, MESH:D015470 | Calcitriol C | 19.38 | 12  |
| SP3      | 6670   | Leukemia, MESH:D015473 | Arsenic Tr   | 19.38 | 165 |
| AZGP1    | 563    | Leukemia, MESH:D015473 | Antimony     | 19.37 | 159 |
| CAPN2    | 824    | Leukemia, MESH:D015473 | Arsenic Ar   | 19.37 | 266 |
| CAVIN3   | 112464 | Leukemia, MESH:D015473 | Arsenic Tr   | 19.37 | 265 |
| CYP2C19  | 1557   | Leukemia, MESH:D015473 | Calcitriol C | 19.37 | 156 |
| GJB2     | 2706   | Leukemia, MESH:D015473 | arsenite C   | 19.37 | 158 |
| IL17RB   | 55540  | Leukemia, MESH:D015473 | Calcitriol C | 19.37 | 154 |
| RNF175   | 285533 | Leukemia, MESH:D015470 | Pentachlo    | 19.37 | 7   |
| SFPQ     | 6421   | Leukemia, MESH:D015473 | Arsenic Ar   | 19.37 | 270 |
| SMPDL3A  | 10924  | Leukemia, MESH:D015473 | Arsenic Ar   | 19.37 | 264 |
| ST3GAL5  | 8869   | Leukemia, MESH:D004915 | Cytarabine   | 19.37 | 2   |
| WIPF1    | 7456   | Leukemia, MESH:D015473 | Arsenic Ar   | 19.37 | 265 |
| ZFHx4    | 79776  | Leukemia, MESH:D015473 | Arsenic Ca   | 19.37 | 20  |
| ZNF271P  | 10778  | Leukemia, MESH:D015470 | Dexameth     | 19.37 | 11  |
| ZNF358   | 140467 | Leukemia, MESH:D015470 | Dexameth     | 19.37 | 6   |
| ZNF439   | 90594  | Leukemia, MESH:D015470 | Dexameth     | 19.37 | 6   |
| COL1A1   | 1277   | Leukemia, MESH:D007948 | 2-(2-amin    | 19.36 | 4   |
| HSPA5    | 3309   | Leukemia, MESH:D007948 | 2-(2-amin    | 19.36 | 3   |
| NOG      | 9241   | Leukemia, MESH:D015473 | Arsenic ca   | 19.36 | 155 |
| PRKAR2A  | 5576   | Leukemia, MESH:D015473 | Arsenic ca   | 19.36 | 157 |
| DSC2     | 1824   | Leukemia, MESH:D004915 | Cytarabine   | 19.35 | 3   |
| GCLC     | 2729   | Leukemia, MESH:D007948 | 2-(2-amin    | 19.35 | 3   |
| SELE     | 6401   | Leukemia, MESH:D015473 | alpha-Toc    | 19.35 | 158 |
| SLC38A2  | 54407  | Leukemia, MESH:D015473 | Arsenic ar   | 19.34 | 162 |
| ACAA2    | 10449  | Leukemia, MESH:D015473 | Arsenic Tr   | 19.33 | 261 |
| CYB5D1   | 124637 | Leukemia, MESH:D015470 | Cytarabine   | 19.33 | 80  |
| DLK2     | 65989  | Leukemia, MESH:D015470 | Calcitriol C | 19.33 | 10  |
| NUSAP1   | 51203  | Leukemia, MESH:D015473 | Arsenic Tr   | 19.33 | 262 |
| SCAMP4   | 113178 | Leukemia, MESH:D015470 | Arsenic Tr   | 19.33 | 16  |
| SLC30A1  | 7779   | Leukemia, MESH:D015473 | Arsenic Tr   | 19.33 | 263 |
| ZNRF2    | 223082 | Leukemia, MESH:D015470 | Bortezomi    | 19.33 | 15  |
| ACTC1    | 70     | Leukemia, MESH:D015470 | Cytarabine   | 19.32 | 81  |
| ALDH1L1  | 10840  | Leukemia, MESH:D015470 | Dexameth     | 19.32 | 10  |
| CEBPG    | 1054   | Leukemia, MESH:D015470 | Dronabinc    | 19.32 | 13  |
| CYP4F11  | 57834  | Leukemia, MESH:D015470 | Alitretinoin | 19.32 | 13  |

|         |        |                        |              |       |     |
|---------|--------|------------------------|--------------|-------|-----|
| EMSY    | 56946  | Leukemia, MESH:D015470 | Doxorubic    | 19.32 | 13  |
| FAM219A | 203259 | Leukemia, MESH:D015470 | Bortezomi    | 19.32 | 13  |
| FMO2    | 2327   | Leukemia, MESH:D015470 | Calcitriol C | 19.32 | 17  |
| GLIPR1  | 11010  | Leukemia, MESH:D015470 | Arsenic Tr   | 19.32 | 25  |
| HESX1   | 8820   | Leukemia, MESH:D015470 | Decitabine   | 19.32 | 14  |
| IRF9    | 10379  | Leukemia, MESH:D015470 | Dexameth     | 19.32 | 13  |
| KLHL26  | 55295  | Leukemia, MESH:D015470 | Doxorubic    | 19.32 | 20  |
| NCEH1   | 57552  | Leukemia, MESH:D015470 | Arsenic Tr   | 19.32 | 18  |
| OST4    | 1E+08  | Leukemia, MESH:D015470 | Dexameth     | 19.32 | 11  |
| PHOSPHC | 493911 | Leukemia, MESH:D015470 | Arsenic Tr   | 19.32 | 14  |
| PI3     | 5266   | Leukemia, MESH:D015470 | Doxorubic    | 19.32 | 17  |
| PIGL    | 9487   | Leukemia, MESH:D015470 | Pentachlo    | 19.32 | 8   |
| STOML1  | 9399   | Leukemia, MESH:D015470 | Calcitriol C | 19.32 | 7   |
| ZUP1    | 221302 | Leukemia, MESH:D015470 | Benzene C    | 19.32 | 21  |
| KMT2C   | 58508  | Leukemia, MESH:D015470 | Arsenic Tr   | 19.31 | 20  |
| ABHD3   | 171586 | Leukemia, MESH:D015470 | Arsenic Tr   | 19.31 | 15  |
| AIF1L   | 83543  | Leukemia, MESH:D015470 | Cytarabine   | 19.31 | 79  |
| AMIGO1  | 57463  | Leukemia, MESH:D015470 | Doxorubic    | 19.31 | 13  |
| ATG2A   | 23130  | Leukemia, MESH:D015470 | Doxorubic    | 19.31 | 14  |
| B4GALT6 | 9331   | Leukemia, MESH:D015470 | Bortezomi    | 19.31 | 10  |
| CAMP    | 820    | Leukemia, MESH:D015470 | Arsenic Tr   | 19.31 | 16  |
| CCDC121 | 79635  | Leukemia, MESH:D015470 | Calcitriol C | 19.31 | 8   |
| CDH4    | 1002   | Leukemia, MESH:D015470 | Dronabinc    | 19.31 | 10  |
| DDA1    | 79016  | Leukemia, MESH:D015470 | Dexameth     | 19.31 | 14  |
| ELF4    | 2000   | Leukemia, MESH:D015470 | Decitabine   | 19.31 | 21  |
| FA2H    | 79152  | Leukemia, MESH:D015470 | Arsenic Tr   | 19.31 | 16  |
| FOXJ1   | 2302   | Leukemia, MESH:D015470 | Decitabine   | 19.31 | 21  |
| HNRNPH3 | 3189   | Leukemia, MESH:D015470 | Dexameth     | 19.31 | 9   |
| ITM2B   | 9445   | Leukemia, MESH:D015470 | Arsenic Tr   | 19.31 | 19  |
| LDLRAD4 | 753    | Leukemia, MESH:D015470 | Dexameth     | 19.31 | 18  |
| LIX1    | 167410 | Leukemia, MESH:D015470 | Doxorubic    | 19.31 | 15  |
| MAD2L1B | 9587   | Leukemia, MESH:D015470 | Dronabinc    | 19.31 | 12  |
| MAP3K12 | 7786   | Leukemia, MESH:D015470 | Carboplati   | 19.31 | 14  |
| MLYCD   | 23417  | Leukemia, MESH:D015470 | Doxorubic    | 19.31 | 15  |
| NAA30   | 122830 | Leukemia, MESH:D015470 | Dexameth     | 19.31 | 13  |
| NAB1    | 4664   | Leukemia, MESH:D015470 | Benzene C    | 19.31 | 24  |
| NANS    | 54187  | Leukemia, MESH:D015470 | Arsenic Tr   | 19.31 | 19  |
| NIPAL2  | 79815  | Leukemia, MESH:D015470 | Calcitriol C | 19.31 | 13  |
| NKTR    | 4820   | Leukemia, MESH:D015470 | Arsenic Tr   | 19.31 | 20  |
| PGM5    | 5239   | Leukemia, MESH:D015470 | Cytarabine   | 19.31 | 83  |
| PIEZO2  | 63895  | Leukemia, MESH:D015470 | Dexameth     | 19.31 | 14  |
| RNF122  | 79845  | Leukemia, MESH:D015470 | Dexameth     | 19.31 | 14  |
| RNF139  | 11236  | Leukemia, MESH:D015470 | Doxorubic    | 19.31 | 12  |
| SH3RF1  | 57630  | Leukemia, MESH:D015470 | Doxorubic    | 19.31 | 15  |
| SNRPN   | 6638   | Leukemia, MESH:D015470 | Dexameth     | 19.31 | 11  |
| SOX5    | 6660   | Leukemia, MESH:D015470 | Dexameth     | 19.31 | 15  |
| SRD5A3  | 79644  | Leukemia, MESH:D015470 | Doxorubic    | 19.31 | 15  |
| TSC22D2 | 9819   | Leukemia, MESH:D015470 | Arsenic Tr   | 19.31 | 21  |
| TTC39C  | 125488 | Leukemia, MESH:D015470 | Calcitriol C | 19.31 | 10  |
| VT A1   | 51534  | Leukemia, MESH:D015470 | Dexameth     | 19.31 | 12  |
| ADARB1  | 104    | Leukemia, MESH:D015473 | arsenite D   | 19.3  | 157 |
| CCR6    | 1235   | Leukemia, MESH:D015473 | Arsenic De   | 19.3  | 158 |
| FLRT3   | 23767  | Leukemia, MESH:D015473 | Arsenic Tr   | 19.3  | 263 |
| LRPPRC  | 10128  | Leukemia, MESH:D015473 | Arsenic ars  | 19.3  | 158 |
| RASA1   | 5921   | Leukemia, MESH:D015473 | Arsenic ars  | 19.3  | 159 |
| RFTN1   | 23180  | Leukemia, MESH:D015473 | Arsenic De   | 19.3  | 157 |
| TNPO1   | 3842   | Leukemia, MESH:D015473 | arsenite C   | 19.3  | 161 |
| ALDH3A1 | 218    | Leukemia, MESH:D015473 | Arsenic Ar   | 19.29 | 265 |

|         |        |                        |              |       |     |
|---------|--------|------------------------|--------------|-------|-----|
| ALDH3A2 | 224    | Leukemia, MESH:D015473 | Antimony     | 19.29 | 263 |
| CAPN1   | 823    | Leukemia, MESH:D015473 | Arsenic Ar   | 19.29 | 266 |
| HIVEP2  | 3097   | Leukemia, MESH:D015473 | arsenite Ci  | 19.29 | 156 |
| KIF11   | 3832   | Leukemia, MESH:D015473 | arsenite Ci  | 19.29 | 157 |
| MAP2K5  | 5607   | Leukemia, MESH:D015473 | Arsenic ar:  | 19.29 | 158 |
| MIR134  | 406924 | Leukemia, MESH:D015473 | arsenite Ci  | 19.29 | 9   |
| SEMA3B  | 7869   | Leukemia, MESH:D015473 | Calcitriol E | 19.29 | 156 |
| STK39   | 27347  | Leukemia, MESH:D015473 | Arsenic Ca   | 19.29 | 158 |
| UAP1    | 6675   | Leukemia, MESH:D015473 | Arsenic Ar   | 19.29 | 264 |
| WNT5A   | 7474   | Leukemia, MESH:D015473 | arsenite Ci  | 19.29 | 157 |
| YBX1    | 4904   | Leukemia, MESH:D015473 | arsenite D   | 19.29 | 157 |
| GH1     | 2688   | Leukemia, MESH:D007948 | 2-(2-amin    | 19.28 | 3   |
| NECAP2  | 55707  | Leukemia, MESH:D015473 | arsenite G   | 19.28 | 156 |
| NTMT1   | 28989  | Leukemia, MESH:D015473 | Arsenic De   | 19.28 | 158 |
| IL1RL1  | 9173   | Leukemia, MESH:D015470 | Calcitriol E | 19.27 | 14  |
| AGRN    | 375790 | Leukemia, MESH:D004915 | Daunorub     | 19.26 | 3   |
| DYNLL1  | 8655   | Leukemia, MESH:D015470 | Decitabine   | 19.25 | 20  |
| HNRNPD1 | 9987   | Leukemia, MESH:D015470 | Doxorubic    | 19.25 | 20  |
| MARCKS  | 4082   | Leukemia, MESH:D015473 | Arsenic Tr   | 19.25 | 261 |
| MDK     | 4192   | Leukemia, MESH:D004915 | Cytarabine   | 19.25 | 3   |
| RIPK3   | 11035  | Leukemia, MESH:D015470 | Bortezomi    | 19.25 | 17  |
| SLC37A4 | 2542   | Leukemia, MESH:D015470 | Arsenic Tr   | 19.25 | 23  |
| TPMT    | 7172   | Leukemia, MESH:D015473 | Arsenic Ar   | 19.25 | 159 |
| EIF3B   | 8662   | Leukemia, MESH:D015473 | Calcitriol C | 19.24 | 155 |
| AKT3    | 10000  | Leukemia, MESH:D015473 | Arsenic ar:  | 19.23 | 159 |
| CD8A    | 925    | Leukemia, MESH:D015473 | Arsenic Cy   | 19.23 | 22  |
| ENTPD1  | 953    | Leukemia, MESH:D015473 | Arsenic Cy   | 19.23 | 161 |
| FGL1    | 2267   | Leukemia, MESH:D015473 | Arsenic Tr   | 19.23 | 262 |
| HDAC9   | 9734   | Leukemia, MESH:D015473 | arsenite G   | 19.23 | 157 |
| MIR34A  | 407040 | Leukemia, MESH:D015473 | arsenite G   | 19.23 | 156 |
| NAV1    | 89796  | Leukemia, MESH:D015473 | Arsenic ar:  | 19.23 | 158 |
| NCOA4   | 8031   | Leukemia, MESH:D015473 | Arsenic Tr   | 19.23 | 157 |
| RPS3A   | 6189   | Leukemia, MESH:D015473 | arsenite ca  | 19.23 | 9   |
| CTSS    | 1520   | Leukemia, MESH:D015470 | Arsenic Tr   | 19.22 | 24  |
| EXOC4   | 60412  | Leukemia, MESH:D015470 | Doxorubic    | 19.22 | 22  |
| GAS2L3  | 283431 | Leukemia, MESH:D015470 | Benzene C    | 19.22 | 28  |
| IDI1    | 3422   | Leukemia, MESH:D015470 | Benzene C    | 19.22 | 34  |
| MPZ     | 4359   | Leukemia, MESH:D015470 | Arsenic Tr   | 19.22 | 23  |
| NPR1    | 4881   | Leukemia, MESH:D015470 | Dexameth     | 19.22 | 14  |
| SLCO3A1 | 28232  | Leukemia, MESH:D015473 | Arsenic Ar   | 19.22 | 265 |
| ZFR     | 51663  | Leukemia, MESH:D015473 | Arsenic ar:  | 19.22 | 160 |
| ACVR2B  | 93     | Leukemia, MESH:D015470 | Decitabine   | 19.21 | 17  |
| ANXA10  | 11199  | Leukemia, MESH:D015470 | Dexameth     | 19.21 | 14  |
| ANXA4   | 307    | Leukemia, MESH:D015473 | Arsenic ar:  | 19.21 | 163 |
| AOPEP   | 84909  | Leukemia, MESH:D015470 | Arsenic Tr   | 19.21 | 20  |
| ARHGEF6 | 9459   | Leukemia, MESH:D015470 | Calcitriol E | 19.21 | 19  |
| CAMTA1  | 23261  | Leukemia, MESH:D015470 | Decitabine   | 19.21 | 20  |
| CENPH   | 64946  | Leukemia, MESH:D015470 | Calcitriol E | 19.21 | 11  |
| CENPJ   | 55835  | Leukemia, MESH:D015470 | Calcitriol E | 19.21 | 9   |
| CHGB    | 1114   | Leukemia, MESH:D015470 | Arsenic Tr   | 19.21 | 18  |
| COX15   | 1355   | Leukemia, MESH:D015470 | Arsenic Tr   | 19.21 | 20  |
| CSNK2B  | 1460   | Leukemia, MESH:D015470 | Air Polluta  | 19.21 | 21  |
| CYB5R1  | 51706  | Leukemia, MESH:D015470 | Bortezomi    | 19.21 | 12  |
| DLL4    | 54567  | Leukemia, MESH:D015470 | Arsenic Tr   | 19.21 | 18  |
| FAM126B | 285172 | Leukemia, MESH:D015470 | Dexameth     | 19.21 | 13  |
| GMPR    | 2766   | Leukemia, MESH:D015470 | Air Polluta  | 19.21 | 9   |
| IL17RD  | 54756  | Leukemia, MESH:D015470 | Doxorubic    | 19.21 | 13  |
| JADE2   | 23338  | Leukemia, MESH:D015470 | Doxorubic    | 19.21 | 17  |

|          |        |                        |              |       |     |
|----------|--------|------------------------|--------------|-------|-----|
| NDUFA13  | 51079  | Leukemia, MESH:D015470 | Doxorubic    | 19.21 | 15  |
| PAG1     | 55824  | Leukemia, MESH:D015470 | Dexameth     | 19.21 | 9   |
| PFKP     | 5214   | Leukemia, MESH:D015473 | Arsenic Tr   | 19.21 | 262 |
| PHKB     | 5257   | Leukemia, MESH:D015470 | Bortezomi    | 19.21 | 17  |
| PITPNM1  | 9600   | Leukemia, MESH:D015470 | Dexameth     | 19.21 | 13  |
| PTX3     | 5806   | Leukemia, MESH:D015473 | Arsenic Ar   | 19.21 | 264 |
| RAB6B    | 51560  | Leukemia, MESH:D015470 | Doxorubic    | 19.21 | 15  |
| SPAG1    | 6674   | Leukemia, MESH:D015470 | Calcitriol E | 19.21 | 11  |
| SRPRB    | 58477  | Leukemia, MESH:D015470 | Dexameth     | 19.21 | 15  |
| ID2      | 3398   | Leukemia, MESH:D015473 | Arsenic Ar   | 19.2  | 267 |
| CNIH2    | 254263 | Leukemia, MESH:D015473 | Arsenic Ca   | 19.19 | 18  |
| RGS13    | 6003   | Leukemia, MESH:D015473 | Cytarabine   | 19.19 | 155 |
| TSLP     | 85480  | Leukemia, MESH:D015470 | 15-deoxy-    | 19.19 | 15  |
| ASCL1B   | 30478  | Leukemia, MESH:D015470 | Dexameth     | 19.18 | 5   |
| BAG3     | 9531   | Leukemia, MESH:D007948 | Arsenic Tr   | 19.18 | 4   |
| CACNA2D  | 781    | Leukemia, MESH:D015470 | Arsenic Tr   | 19.18 | 32  |
| GNAI3    | 2773   | Leukemia, MESH:D015473 | alpha-Toc    | 19.18 | 154 |
| KLRK1    | 22914  | Leukemia, MESH:D015473 | Arsenic Ar   | 19.18 | 158 |
| MIR10B   | 406903 | Leukemia, MESH:D015473 | Arsenic Tr   | 19.18 | 261 |
| MIR155   | 406947 | Leukemia, MESH:D015473 | Antineopl    | 19.18 | 263 |
| MYSM1    | 114803 | Leukemia, MESH:D015470 | Doxorubic    | 19.18 | 16  |
| OGA      | 10724  | Leukemia, MESH:D015470 | Dexameth     | 19.18 | 14  |
| OGT      | 8473   | Leukemia, MESH:D015470 | Arsenic Tr   | 19.18 | 23  |
| POLR2D   | 5433   | Leukemia, MESH:D015473 | arsenite M   | 19.18 | 158 |
| SLC39A10 | 57181  | Leukemia, MESH:D015470 | Arsenic Tr   | 19.18 | 22  |
| SMARCA2  | 6595   | Leukemia, MESH:D015470 | Arsenic Tr   | 19.18 | 20  |
| TLR2     | 7097   | Leukemia, MESH:D015473 | arsenic dis  | 19.18 | 260 |
| ZSCAN12  | 9753   | Leukemia, MESH:D015470 | Decitabine   | 19.18 | 16  |
| ANKRD36  | 645784 | Leukemia, MESH:D015470 | Dexameth     | 19.17 | 5   |
| ASPRV1   | 151516 | Leukemia, MESH:D015470 | Dexameth     | 19.17 | 10  |
| CTSC     | 1075   | Leukemia, MESH:D015470 | Arsenic Tr   | 19.17 | 17  |
| CUZD1    | 50624  | Leukemia, MESH:D015473 | Arsenic De   | 19.17 | 154 |
| DOCK8    | 81704  | Leukemia, MESH:D015473 | arsenite Ci  | 19.17 | 158 |
| FKBP15   | 23307  | Leukemia, MESH:D015470 | Air Polluta  | 19.17 | 13  |
| GLA      | 2717   | Leukemia, MESH:D015473 | Antimony     | 19.17 | 262 |
| ILDR1    | 286676 | Leukemia, MESH:D015470 | Calcitriol E | 19.17 | 9   |
| KLHDC4   | 54758  | Leukemia, MESH:D015470 | Benzene E    | 19.17 | 27  |
| LGR5     | 8549   | Leukemia, MESH:D015473 | Arsenic Ar   | 19.17 | 160 |
| NUP62CL  | 54830  | Leukemia, MESH:D015470 | Calcitriol M | 19.17 | 10  |
| NYNRIN   | 57523  | Leukemia, MESH:D015470 | Decitabine   | 19.17 | 20  |
| PLXDC2   | 84898  | Leukemia, MESH:D015473 | Arsenic ar:  | 19.17 | 13  |
| RHOU     | 58480  | Leukemia, MESH:D015473 | Genistein I  | 19.17 | 158 |
| SIPA1L2  | 57568  | Leukemia, MESH:D015473 | Calcitriol C | 19.17 | 157 |
| TBX21    | 30009  | Leukemia, MESH:D015473 | Arsenic Bu   | 19.17 | 159 |
| TNFRSF10 | 8794   | Leukemia, MESH:D015473 | Arsenic Tr   | 19.17 | 261 |
| TSEN54   | 283989 | Leukemia, MESH:D015470 | Benzene E    | 19.17 | 25  |
| ZBED8    | 63920  | Leukemia, MESH:D015470 | Calcitriol F | 19.17 | 9   |
| ZNF589   | 51385  | Leukemia, MESH:D015470 | Air Polluta  | 19.17 | 14  |
| ZNF93    | 81931  | Leukemia, MESH:D015470 | Doxorubic    | 19.17 | 14  |
| ARMH4    | 145407 | Leukemia, MESH:D015470 | Doxorubic    | 19.16 | 12  |
| BMI1     | 648    | Leukemia, MESH:D015473 | Arsenic Ar   | 19.16 | 263 |
| CXCR6    | 10663  | Leukemia, MESH:D015473 | Arsenic De   | 19.16 | 10  |
| EXTL3    | 2137   | Leukemia, MESH:D015473 | Arsenic ar:  | 19.16 | 157 |
| KPNA5    | 3841   | Leukemia, MESH:D015470 | Dexameth     | 19.16 | 12  |
| LYRM9    | 201229 | Leukemia, MESH:D015470 | Doxorubic    | 19.16 | 13  |
| NFKBIZ   | 64332  | Leukemia, MESH:D015473 | Arsenic ar:  | 19.16 | 160 |
| NTMT1    | 28989  | Leukemia, MESH:D015470 | Dexameth     | 19.16 | 15  |
| OIP5     | 11339  | Leukemia, MESH:D015473 | Calcitriol E | 19.16 | 156 |

|          |        |                            |              |       |     |
|----------|--------|----------------------------|--------------|-------|-----|
| PARS2    | 25973  | Leukemia, MESH:D015470     | Dexameth     | 19.16 | 12  |
| RAI14    | 26064  | Leukemia, MESH:D015473     | Arsenic ar   | 19.16 | 157 |
| RASL11B  | 65997  | Leukemia, MESH:D015473     | Arsenic ar   | 19.16 | 157 |
| SHLD2    | 54537  | Leukemia, MESH:D015470     | Dexameth     | 19.16 | 13  |
| TUBGCP5  | 114791 | Leukemia, MESH:D015473     | Dexameth     | 19.16 | 154 |
| UBE2H    | 7328   | Leukemia, MESH:D015473     | Arsenic Tr   | 19.16 | 263 |
| USP6NL   | 9712   | Leukemia, MESH:D015470     | Calcitriol C | 19.16 | 14  |
| ZNF219   | 51222  | Leukemia, MESH:D015470     | Dexameth     | 19.16 | 13  |
| ZBTB20   | 26137  | Leukemia, MESH:D004915     | Daunorub     | 19.14 | 3   |
| FBN1     | 2200   | Leukemia, MESH:D015473     | arsenite D   | 19.13 | 158 |
| PPP1R3C  | 5507   | Leukemia, MESH:D015473     | arsenite D   | 19.13 | 155 |
| BACH2    | 60468  | Leukemia, MESH:D01marker/m | Arsenic Tr   | 19.12 | 22  |
| ARAF     | 369    | Leukemia, MESH:D015470     | Dexameth     | 19.12 | 11  |
| ARG1     | 383    | Leukemia, MESH:D015473     | Arsenic Ar   | 19.12 | 265 |
| BID      | 637    | Leukemia, MESH:D004915     | Cytarabine   | 19.12 | 2   |
| CAPN6    | 827    | Leukemia, MESH:D015470     | Arsenic Tr   | 19.12 | 19  |
| CDS2     | 8760   | Leukemia, MESH:D015470     | Dexameth     | 19.12 | 15  |
| CELSR3   | 1951   | Leukemia, MESH:D015470     | Dexameth     | 19.12 | 14  |
| CETN3    | 1070   | Leukemia, MESH:D015470     | Decitabine   | 19.12 | 14  |
| DDHD1    | 80821  | Leukemia, MESH:D015470     | Doxorubic    | 19.12 | 14  |
| EMILIN1  | 11117  | Leukemia, MESH:D015470     | Doxorubic    | 19.12 | 14  |
| EPHA7    | 2045   | Leukemia, MESH:D015470     | Dexameth     | 19.12 | 14  |
| FIGN     | 55137  | Leukemia, MESH:D015470     | Dronabinc    | 19.12 | 11  |
| FLVCR2   | 55640  | Leukemia, MESH:D015470     | Doxorubic    | 19.12 | 14  |
| FNIP1    | 96459  | Leukemia, MESH:D015470     | Arsenic Tr   | 19.12 | 21  |
| HAGH     | 3029   | Leukemia, MESH:D015470     | Arsenic Tr   | 19.12 | 16  |
| IER5     | 51278  | Leukemia, MESH:D015470     | Cyclophos    | 19.12 | 18  |
| IFNA1    | 3439   | Leukemia, MESH:D015470     | Cyclophos    | 19.12 | 13  |
| LYAR     | 55646  | Leukemia, MESH:D015470     | Calcitriol C | 19.12 | 11  |
| MXD3     | 83463  | Leukemia, MESH:D015470     | Calcitriol C | 19.12 | 79  |
| ND2      | 4536   | Leukemia, MESH:D015470     | Deferoxan    | 19.12 | 13  |
| NDUFAF4  | 29078  | Leukemia, MESH:D015470     | Doxorubic    | 19.12 | 14  |
| NIBAN1   | 116496 | Leukemia, MESH:D004915     | Doxorubic    | 19.12 | 3   |
| OSR2     | 116039 | Leukemia, MESH:D015470     | Calcitriol C | 19.12 | 8   |
| OVOS2    | 144203 | Leukemia, MESH:D015470     | Air Polluta  | 19.12 | 13  |
| PDLIM5   | 10611  | Leukemia, MESH:D015470     | Arsenic Tr   | 19.12 | 21  |
| PSMA2    | 5683   | Leukemia, MESH:D015470     | Dexameth     | 19.12 | 16  |
| RAB1A    | 5861   | Leukemia, MESH:D015470     | Arsenic Tr   | 19.12 | 18  |
| SASH1    | 23328  | Leukemia, MESH:D015470     | Arsenic Tr   | 19.12 | 15  |
| SLC16A5  | 9121   | Leukemia, MESH:D015470     | Calcitriol C | 19.12 | 10  |
| SLC25A36 | 55186  | Leukemia, MESH:D015470     | Dexameth     | 19.12 | 8   |
| SLC29A3  | 55315  | Leukemia, MESH:D015470     | Decitabine   | 19.12 | 16  |
| SNRPB    | 6628   | Leukemia, MESH:D015470     | Arsenic Tr   | 19.12 | 16  |
| SPEG     | 10290  | Leukemia, MESH:D015470     | Arsenic Tr   | 19.12 | 21  |
| STAB1    | 23166  | Leukemia, MESH:D015470     | Arsenic Tr   | 19.12 | 22  |
| TFCP2L1  | 29842  | Leukemia, MESH:D015470     | Calcitriol C | 19.12 | 11  |
| TIMM8B   | 26521  | Leukemia, MESH:D015470     | Dexameth     | 19.12 | 14  |
| WASF2    | 10163  | Leukemia, MESH:D015470     | Dexameth     | 19.12 | 11  |
| JAK3     | 3718   | Leukemia, MESH:D015473     | Arsenic Ar   | 19.11 | 163 |
| MEST     | 4232   | Leukemia, MESH:D015473     | arsenite D   | 19.11 | 156 |
| NAB2     | 4665   | Leukemia, MESH:D015473     | Arsenic Tr   | 19.11 | 260 |
| PPIAL4A  | 653505 | Leukemia, MESH:D015470     | Dexameth     | 19.11 | 7   |
| PTPN14   | 5784   | Leukemia, MESH:D015470     | Dexameth     | 19.11 | 14  |
| SEPN1    | 1E+08  | Leukemia, MESH:D015470     | Dexameth     | 19.11 | 8   |
| B4GALT1  | 2683   | Leukemia, MESH:D015473     | Calcitriol C | 19.1  | 154 |
| C17ORF45 | 124944 | Leukemia, MESH:D015470     | Decitabine   | 19.1  | 14  |
| GFPT2    | 9945   | Leukemia, MESH:D015473     | Arsenic Ca   | 19.1  | 159 |
| HHIP     | 64399  | Leukemia, MESH:D015473     | Calcitriol C | 19.1  | 156 |

|          |        |                        |              |       |     |
|----------|--------|------------------------|--------------|-------|-----|
| PDE7B    | 27115  | Leukemia, MESH:D015473 | Arsenic Ar   | 19.1  | 161 |
| SREBF2   | 6721   | Leukemia, MESH:D007948 | 2-(2-amin    | 19.1  | 2   |
| TP53BP1  | 7158   | Leukemia, MESH:D015473 | Arsenic De   | 19.1  | 158 |
| C22ORF3C | 128977 | Leukemia, MESH:D015470 | Dexameth     | 19.09 | 11  |
| ZNF414   | 84330  | Leukemia, MESH:D015470 | Dexameth     | 19.09 | 6   |
| NR1I3    | 9970   | Leukemia, MESH:D015470 | Alitretinoin | 19.08 | 33  |
| LRRC15   | 131578 | Leukemia, MESH:D015473 | caffeic acid | 19.07 | 153 |
| PTGS2    | 5743   | Leukemia, MESH:D007948 | 2-(2-amin    | 19.07 | 4   |
| NLRP3    | 114548 | Leukemia, MESH:D015473 | Arsenic Ar   | 19.06 | 264 |
| TBCA     | 6902   | Leukemia, MESH:D015473 | arsenite Bi  | 19.06 | 157 |
| ABCB6    | 10058  | Leukemia, MESH:D015470 | Docetaxel    | 19.05 | 12  |
| AQP3     | 360    | Leukemia, MESH:D007948 | 2-(2-amin    | 19.05 | 3   |
| BAXA     | 58081  | Leukemia, MESH:D015473 | Dexameth     | 19.05 | 7   |
| FLG      | 2312   | Leukemia, MESH:D015473 | Antimony     | 19.05 | 157 |
| KCNN4    | 3783   | Leukemia, MESH:D015470 | Decitabine   | 19.05 | 20  |
| MYLIP    | 29116  | Leukemia, MESH:D015470 | Calcitriol C | 19.05 | 82  |
| MYLK     | 4638   | Leukemia, MESH:D007948 | 2-(2-amin    | 19.05 | 3   |
| PSMB1    | 5689   | Leukemia, MESH:D015470 | Arsenic Tr   | 19.05 | 21  |
| SCO2     | 9997   | Leukemia, MESH:D015473 | Arsenic Tr   | 19.05 | 261 |
| SRSF1    | 6426   | Leukemia, MESH:D015470 | Bortezomi    | 19.05 | 19  |
| SRSF5    | 6430   | Leukemia, MESH:D015470 | Arsenic Tr   | 19.05 | 31  |
| TENM1    | 10178  | Leukemia, MESH:D015473 | Arsenic Ar   | 19.05 | 261 |
| WIP1     | 55062  | Leukemia, MESH:D015470 | Calcitriol C | 19.05 | 24  |
| ETHE1    | 23474  | Leukemia, MESH:D015473 | Arsenic Tr   | 19.04 | 261 |
| GCNT2    | 2651   | Leukemia, MESH:D015473 | Arsenic ars  | 19.04 | 160 |
| KMO      | 8564   | Leukemia, MESH:D015473 | Calcitriol C | 19.04 | 159 |
| MSX1     | 4487   | Leukemia, MESH:D015473 | Arsenic ars  | 19.04 | 160 |
| OGN      | 4969   | Leukemia, MESH:D015473 | Arsenic Tr   | 19.04 | 260 |
| PPP2CB   | 5516   | Leukemia, MESH:D015473 | Arsenic Ar   | 19.04 | 160 |
| PSME4    | 23198  | Leukemia, MESH:D015473 | Arsenic Tr   | 19.04 | 262 |
| TACSTD2  | 4070   | Leukemia, MESH:D015473 | Arsenic Tr   | 19.04 | 261 |
| ATP1B3   | 483    | Leukemia, MESH:D015473 | Arsenic De   | 19.03 | 158 |
| CXCR6    | 10663  | Leukemia, MESH:D015470 | Benzene C    | 19.03 | 22  |
| ECHDC1   | 55862  | Leukemia, MESH:D015470 | Air Polluta  | 19.03 | 14  |
| MIP      | 4284   | Leukemia, MESH:D015470 | Alitretinoin | 19.03 | 10  |
| NUDT18   | 79873  | Leukemia, MESH:D015470 | Air Polluta  | 19.03 | 21  |
| POLDIP2  | 26073  | Leukemia, MESH:D015470 | Arsenic Tr   | 19.03 | 36  |
| PPP1R21  | 129285 | Leukemia, MESH:D015470 | Air Polluta  | 19.03 | 8   |
| RNF4     | 6047   | Leukemia, MESH:D015470 | Arsenic Tr   | 19.03 | 21  |
| SARS1    | 6301   | Leukemia, MESH:D015470 | Doxorubic    | 19.03 | 14  |
| SORT1    | 6272   | Leukemia, MESH:D004915 | Doxorubic    | 19.03 | 3   |
| SUSD2    | 56241  | Leukemia, MESH:D015470 | Dexameth     | 19.03 | 13  |
| ANGEL2   | 90806  | Leukemia, MESH:D015470 | Dexameth     | 19.02 | 10  |
| B3GALNT2 | 148789 | Leukemia, MESH:D015470 | Cyclophos    | 19.02 | 8   |
| BEX1     | 55859  | Leukemia, MESH:D015470 | Dexameth     | 19.02 | 14  |
| BMP2K    | 55589  | Leukemia, MESH:D015470 | Dexameth     | 19.02 | 13  |
| BPTF     | 2186   | Leukemia, MESH:D015470 | Dexameth     | 19.02 | 15  |
| CCDC102A | 92922  | Leukemia, MESH:D015470 | Cytarabine   | 19.02 | 76  |
| CD7      | 924    | Leukemia, MESH:D015470 | Benzene C    | 19.02 | 21  |
| CDC27    | 996    | Leukemia, MESH:D015470 | Arsenic Tr   | 19.02 | 20  |
| CHST11   | 50515  | Leukemia, MESH:D015470 | Bortezomi    | 19.02 | 16  |
| DCAKD    | 79877  | Leukemia, MESH:D015470 | Dexameth     | 19.02 | 15  |
| DNAAF3   | 352909 | Leukemia, MESH:D015470 | Doxorubic    | 19.02 | 12  |
| HCN1     | 348980 | Leukemia, MESH:D015470 | Doxorubic    | 19.02 | 12  |
| HIP1R    | 9026   | Leukemia, MESH:D015470 | Arsenic Tr   | 19.02 | 21  |
| LACTB    | 114294 | Leukemia, MESH:D015470 | Decitabine   | 19.02 | 20  |
| LPCAT3   | 10162  | Leukemia, MESH:D015470 | Dexameth     | 19.02 | 11  |
| MEX3A    | 92312  | Leukemia, MESH:D015470 | Calcitriol C | 19.02 | 7   |

|          |        |                        |              |       |     |
|----------|--------|------------------------|--------------|-------|-----|
| NIPSNAP1 | 8508   | Leukemia, MESH:D015470 | Bortezomi    | 19.02 | 21  |
| NPEPPS   | 9520   | Leukemia, MESH:D015470 | Dexameth     | 19.02 | 14  |
| PDCD11   | 22984  | Leukemia, MESH:D015470 | Dexameth     | 19.02 | 18  |
| PDE6B    | 5158   | Leukemia, MESH:D015470 | Dexameth     | 19.02 | 8   |
| PHF12    | 57649  | Leukemia, MESH:D015470 | Arsenic Tr   | 19.02 | 22  |
| PSMF1    | 9491   | Leukemia, MESH:D015470 | Bortezomi    | 19.02 | 14  |
| RGS13    | 6003   | Leukemia, MESH:D015470 | Cytarabine   | 19.02 | 83  |
| RIPOR1   | 79567  | Leukemia, MESH:D015470 | Calcitriol C | 19.02 | 20  |
| RWDD3    | 25950  | Leukemia, MESH:D015470 | Dexameth     | 19.02 | 9   |
| SCIN     | 85477  | Leukemia, MESH:D015470 | Arsenic Tr   | 19.02 | 20  |
| TBCC     | 6903   | Leukemia, MESH:D015470 | Dexameth     | 19.02 | 13  |
| TMTC4    | 84899  | Leukemia, MESH:D015470 | Dexameth     | 19.02 | 9   |
| TRIP11   | 9321   | Leukemia, MESH:D015470 | Air Polluta  | 19.02 | 20  |
| TRMT13   | 54482  | Leukemia, MESH:D015470 | Dronabinc    | 19.02 | 8   |
| VAMP5    | 10791  | Leukemia, MESH:D015470 | Calcitriol C | 19.02 | 13  |
| WSB2     | 55884  | Leukemia, MESH:D015470 | Arsenic Tr   | 19.02 | 14  |
| ZNF146   | 7705   | Leukemia, MESH:D015470 | Air Polluta  | 19.02 | 13  |
| ABRACL   | 58527  | Leukemia, MESH:D015470 | Dexameth     | 19.01 | 8   |
| FAM91A1  | 157769 | Leukemia, MESH:D015470 | Dexameth     | 19.01 | 12  |
| KMT2A    | 4297   | Leukemia, MESH:D004915 | Cytarabine   | 19.01 | 2   |
| CHEK1    | 1111   | Leukemia, MESH:D015473 | Arsenic Tr   | 19    | 263 |
| FABP3    | 2170   | Leukemia, MESH:D015473 | Arsenic ars  | 19    | 17  |
| PLD1     | 5337   | Leukemia, MESH:D015473 | Arsenic ars  | 19    | 160 |
| PERP     | 64065  | Leukemia, MESH:D015473 | alvocidib a  | 18.99 | 155 |
| RBBP8    | 5932   | Leukemia, MESH:D015473 | Calcitriol C | 18.99 | 156 |
| CAMKK2   | 10645  | Leukemia, MESH:D015473 | Arsenic ars  | 18.98 | 12  |
| DRAM1    | 55332  | Leukemia, MESH:D015473 | arsenite M   | 18.98 | 157 |
| FAT1     | 2195   | Leukemia, MESH:D015470 | Arsenic Tr   | 18.98 | 20  |
| HSPG2    | 3339   | Leukemia, MESH:D015473 | arsenite C   | 18.98 | 155 |
| ILF3     | 3609   | Leukemia, MESH:D015473 | Dexameth     | 18.98 | 159 |
| MBNL2    | 10150  | Leukemia, MESH:D015470 | Air Polluta  | 18.98 | 21  |
| NFKB1    | 4790   | Leukemia, MESH:D007948 | 2-(2-amin    | 18.98 | 3   |
| RAF1     | 5894   | Leukemia, MESH:D015473 | 2-(2-chlor   | 18.98 | 265 |
| SLC22A18 | 5002   | Leukemia, MESH:D015473 | Arsenic Ar   | 18.98 | 264 |
| TAX1BP3  | 30851  | Leukemia, MESH:D015473 | Daunorub     | 18.98 | 160 |
| CFL1     | 1072   | Leukemia, MESH:D015473 | Arsenic Ar   | 18.97 | 265 |
| NAV3     | 89795  | Leukemia, MESH:D015473 | Arsenic Tr   | 18.97 | 261 |
| ST8SIA4  | 7903   | Leukemia, MESH:D015473 | Arsenic Tr   | 18.97 | 263 |
| BCHE     | 590    | Leukemia, MESH:D015470 | Arsenic Tr   | 18.96 | 51  |
| EGFR     | 1956   | Leukemia, MESH:D007948 | 2-(2-amin    | 18.96 | 3   |
| ABCC1    | 4363   | Leukemia, MESH:D004915 | Cytarabine   | 18.94 | 3   |
| COQ2     | 27235  | Leukemia, MESH:D015473 | Arsenic Ar   | 18.94 | 159 |
| CYP2A4   | 13086  | Leukemia, MESH:D015470 | Benzene C    | 18.94 | 35  |
| CYP2C18  | 1562   | Leukemia, MESH:D015470 | Cyclophos    | 18.94 | 17  |
| POLK     | 51426  | Leukemia, MESH:D015470 | Benzene C    | 18.94 | 26  |
| PRRG4    | 79056  | Leukemia, MESH:D015470 | Hydroxyur    | 18.94 | 11  |
| ARNTL    | 406    | Leukemia, MESH:D015473 | Arsenic De   | 18.93 | 155 |
| B3GALNT1 | 8706   | Leukemia, MESH:D015470 | Decitabine   | 18.93 | 21  |
| CACNB3   | 784    | Leukemia, MESH:D015470 | Decitabine   | 18.93 | 19  |
| DCUN1D4  | 23142  | Leukemia, MESH:D015470 | Dexameth     | 18.93 | 12  |
| DOCK11   | 139818 | Leukemia, MESH:D015470 | Calcitriol C | 18.93 | 9   |
| FAM81A   | 145773 | Leukemia, MESH:D015473 | Calcitriol C | 18.93 | 154 |
| HADH     | 3033   | Leukemia, MESH:D015473 | Arsenic Tr   | 18.93 | 261 |
| HCAR2    | 338442 | Leukemia, MESH:D015473 | Cholesterc   | 18.93 | 153 |
| JAG2     | 3714   | Leukemia, MESH:D015470 | Arsenic Tr   | 18.93 | 20  |
| KRT2     | 3849   | Leukemia, MESH:D015473 | Arsenic Ca   | 18.93 | 156 |
| LAT      | 27040  | Leukemia, MESH:D015470 | Arsenic Tr   | 18.93 | 17  |
| LYPD1    | 116372 | Leukemia, MESH:D015470 | Decitabine   | 18.93 | 20  |



|          |        |                        |              |       |     |
|----------|--------|------------------------|--------------|-------|-----|
| MGA      | 23269  | Leukemia, MESH:D015473 | Arsenic Re   | 18.93 | 158 |
| PGRMC2   | 10424  | Leukemia, MESH:D015470 | Dexameth     | 18.93 | 15  |
| PIK3IP1  | 113791 | Leukemia, MESH:D015470 | Calcitriol C | 18.93 | 9   |
| RAB27A   | 5873   | Leukemia, MESH:D015470 | Alitretinoin | 18.93 | 9   |
| RAI1     | 10743  | Leukemia, MESH:D015470 | Dexameth     | 18.93 | 14  |
| RFC1     | 5981   | Leukemia, MESH:D015470 | Dexameth     | 18.93 | 24  |
| RIMBP2   | 23504  | Leukemia, MESH:D015473 | Arsenic Ar   | 18.93 | 263 |
| SAR1B    | 51128  | Leukemia, MESH:D015470 | Dexameth     | 18.93 | 9   |
| SCN8A    | 6334   | Leukemia, MESH:D015470 | Dexameth     | 18.93 | 9   |
| SLC2A12  | 154091 | Leukemia, MESH:D015470 | Dexameth     | 18.93 | 14  |
| SMAD9    | 4093   | Leukemia, MESH:D015470 | Decitabine   | 18.93 | 21  |
| SPA17    | 53340  | Leukemia, MESH:D015470 | Doxorubic    | 18.93 | 13  |
| SYT7     | 9066   | Leukemia, MESH:D015470 | Decitabine   | 18.93 | 21  |
| TBX6     | 6911   | Leukemia, MESH:D015473 | Arsenic Tr   | 18.93 | 259 |
| TCF21    | 6943   | Leukemia, MESH:D015470 | Cytarabine   | 18.93 | 83  |
| TRAM1    | 23471  | Leukemia, MESH:D015470 | Dexameth     | 18.93 | 14  |
| ADAMTS9  | 56999  | Leukemia, MESH:D015473 | Calcitriol C | 18.92 | 157 |
| DDR1     | 780    | Leukemia, MESH:D015473 | arsenite Ci  | 18.92 | 155 |
| DDX21    | 9188   | Leukemia, MESH:D015470 | Arsenic Tr   | 18.92 | 19  |
| ELN      | 2006   | Leukemia, MESH:D015470 | Calcitriol C | 18.92 | 16  |
| ERP29    | 10961  | Leukemia, MESH:D015470 | Deferoxan    | 18.92 | 17  |
| MR1      | 3140   | Leukemia, MESH:D015473 | Arsenic Ar   | 18.92 | 263 |
| PELI1    | 57162  | Leukemia, MESH:D015473 | Arsenic Ar   | 18.92 | 267 |
| TIMP2    | 7077   | Leukemia, MESH:D015473 | Arsenic Ar   | 18.92 | 265 |
| TMPRSS2  | 7113   | Leukemia, MESH:D015473 | Calcitriol C | 18.92 | 156 |
| TRPV6    | 55503  | Leukemia, MESH:D015473 | arsenite Ci  | 18.92 | 7   |
| VEGFD    | 2277   | Leukemia, MESH:D015470 | Arsenic Tr   | 18.92 | 17  |
| YDJC     | 150223 | Leukemia, MESH:D015473 | arsenite D   | 18.92 | 154 |
| AFF4     | 27125  | Leukemia, MESH:D015473 | Arsenic Ar   | 18.91 | 161 |
| RPL7     | 6129   | Leukemia, MESH:D015473 | Arsenic Ar   | 18.91 | 266 |
| SCPEP1   | 59342  | Leukemia, MESH:D015473 | Arsenic Tr   | 18.91 | 262 |
| NOS2A    | 404036 | Leukemia, MESH:D015470 | Arsenic Tr   | 18.9  | 18  |
| CYP7B1   | 9420   | Leukemia, MESH:D015473 | Arsenic Ar   | 18.89 | 160 |
| HLA-DQA  | 3117   | Leukemia, MESH:D015470 | Benzene C    | 18.89 | 23  |
| MUC16    | 94025  | Leukemia, MESH:D015470 | Air Polluta  | 18.89 | 9   |
| NEMP1    | 23306  | Leukemia, MESH:D015470 | Calcitriol C | 18.89 | 15  |
| RBBP5    | 5929   | Leukemia, MESH:D015470 | Daunorub     | 18.89 | 38  |
| CAMTA2   | 23125  | Leukemia, MESH:D015470 | Decitabine   | 18.88 | 20  |
| CCDC12   | 151903 | Leukemia, MESH:D015470 | Gasoline li  | 18.88 | 12  |
| CPT1B    | 1375   | Leukemia, MESH:D015473 | Arsenic Ar   | 18.88 | 264 |
| DCTN5    | 84516  | Leukemia, MESH:D015470 | Doxorubic    | 18.88 | 13  |
| FAM110A  | 83541  | Leukemia, MESH:D015470 | Calcitriol C | 18.88 | 7   |
| FYB1     | 2533   | Leukemia, MESH:D015470 | Arsenic Tr   | 18.88 | 16  |
| GGA3     | 23163  | Leukemia, MESH:D015470 | Arsenic Tr   | 18.88 | 22  |
| NSUN6    | 221078 | Leukemia, MESH:D015470 | Calcitriol C | 18.88 | 13  |
| PIGZ     | 80235  | Leukemia, MESH:D015470 | (+)-JQ1 c    | 18.88 | 10  |
| RPP25L   | 138716 | Leukemia, MESH:D015470 | Decitabine   | 18.88 | 19  |
| SCD5     | 79966  | Leukemia, MESH:D015470 | Pentachlo    | 18.88 | 11  |
| SETD1A   | 9739   | Leukemia, MESH:D015470 | Decitabine   | 18.88 | 15  |
| SGSH     | 6448   | Leukemia, MESH:D015470 | Bortezomi    | 18.88 | 13  |
| SMG7     | 9887   | Leukemia, MESH:D015470 | Doxorubic    | 18.88 | 13  |
| TAF12    | 6883   | Leukemia, MESH:D015470 | Dexameth     | 18.88 | 9   |
| TENM1    | 10178  | Leukemia, MESH:D015470 | Arsenic Tr   | 18.88 | 15  |
| TRMT2A   | 27037  | Leukemia, MESH:D015470 | Dexameth     | 18.88 | 12  |
| ZBTB8A   | 653121 | Leukemia, MESH:D015470 | Indometha    | 18.88 | 9   |
| ADAL     | 161823 | Leukemia, MESH:D015470 | Doxorubic    | 18.87 | 13  |
| C15ORF39 | 56905  | Leukemia, MESH:D015470 | Dexameth     | 18.87 | 15  |
| CRISPLD1 | 83690  | Leukemia, MESH:D015470 | Calcitriol C | 18.87 | 13  |

|          |        |                        |              |       |     |
|----------|--------|------------------------|--------------|-------|-----|
| EDC3     | 80153  | Leukemia, MESH:D015470 | Dexameth     | 18.87 | 12  |
| GAD1     | 2571   | Leukemia, MESH:D015470 | Decitabine   | 18.87 | 24  |
| GTF3C6   | 112495 | Leukemia, MESH:D015470 | Doxorubic    | 18.87 | 12  |
| HIPK2    | 28996  | Leukemia, MESH:D004915 | Doxorubic    | 18.87 | 3   |
| INTS10   | 55174  | Leukemia, MESH:D015470 | Dexameth     | 18.87 | 13  |
| LRRC42   | 115353 | Leukemia, MESH:D015470 | Decitabine   | 18.87 | 15  |
| PIGK     | 10026  | Leukemia, MESH:D015470 | Dexameth     | 18.87 | 14  |
| PTPRT    | 11122  | Leukemia, MESH:D015470 | Dronabinc    | 18.87 | 8   |
| SMARCD1  | 6602   | Leukemia, MESH:D015470 | Dexameth     | 18.87 | 13  |
| SRD5A1   | 6715   | Leukemia, MESH:D015470 | Androgen     | 18.87 | 31  |
| TMEM147  | 10430  | Leukemia, MESH:D015470 | Doxorubic    | 18.87 | 13  |
| TOM1L1   | 10040  | Leukemia, MESH:D015470 | Dexameth     | 18.87 | 13  |
| ZW10     | 9183   | Leukemia, MESH:D015470 | Arsenic Tr   | 18.87 | 18  |
| CTSB     | 1508   | Leukemia, MESH:D015473 | Arsenic Ar   | 18.86 | 264 |
| FOXA2    | 3170   | Leukemia, MESH:D015470 | Dexameth     | 18.86 | 12  |
| MMP14    | 4323   | Leukemia, MESH:D007948 | 2-(2-amin    | 18.86 | 2   |
| RPA2     | 6118   | Leukemia, MESH:D015473 | arsenite C   | 18.86 | 10  |
| C11ORF8C | 79703  | Leukemia, MESH:D015470 | Calcitriol I | 18.85 | 6   |
| CBX3     | 11335  | Leukemia, MESH:D015470 | Alitretinoi  | 18.85 | 18  |
| DLK1     | 8788   | Leukemia, MESH:D015473 | Arsenic Ar   | 18.85 | 263 |
| FOSL2    | 2355   | Leukemia, MESH:D015473 | alpha-Toc    | 18.85 | 157 |
| GAP43    | 2596   | Leukemia, MESH:D015473 | Arsenic Ar   | 18.85 | 268 |
| GNG11    | 2791   | Leukemia, MESH:D015473 | arsenite D   | 18.85 | 155 |
| GRIA4    | 2893   | Leukemia, MESH:D015470 | Benzoates    | 18.85 | 15  |
| HSPE1    | 3336   | Leukemia, MESH:D015473 | Arsenic Ca   | 18.85 | 159 |
| KIAA1522 | 57648  | Leukemia, MESH:D015470 | Arsenic Tr   | 18.85 | 14  |
| PID1     | 55022  | Leukemia, MESH:D015470 | Dexameth     | 18.85 | 16  |
| RPS6KA3  | 6197   | Leukemia, MESH:D015470 | Arsenic Tr   | 18.85 | 22  |
| S100A14  | 57402  | Leukemia, MESH:D015470 | Arsenic Tr   | 18.85 | 16  |
| SET      | 6418   | Leukemia, MESH:D015473 | Arsenic Ar   | 18.85 | 264 |
| SIRPA    | 140885 | Leukemia, MESH:D015473 | Arsenic Tr   | 18.85 | 263 |
| WNT3A    | 89780  | Leukemia, MESH:D015473 | Arsenic De   | 18.85 | 158 |
| ARID1B   | 57492  | Leukemia, MESH:D015470 | Arsenic Tr   | 18.84 | 22  |
| CCDC88A  | 55704  | Leukemia, MESH:D015470 | Doxorubic    | 18.84 | 15  |
| COX6A1   | 1337   | Leukemia, MESH:D015470 | Dexameth     | 18.84 | 16  |
| CTPS2    | 56474  | Leukemia, MESH:D015470 | Arsenic Tr   | 18.84 | 15  |
| DMGDH    | 29958  | Leukemia, MESH:D015470 | Calcitriol C | 18.84 | 12  |
| FGF10    | 2255   | Leukemia, MESH:D015470 | Arsenic Tr   | 18.84 | 17  |
| GCA      | 25801  | Leukemia, MESH:D015470 | Air Polluta  | 18.84 | 79  |
| INPPL1   | 3636   | Leukemia, MESH:D015470 | Arsenic Tr   | 18.84 | 20  |
| KRT13    | 3860   | Leukemia, MESH:D015470 | Arsenic Tr   | 18.84 | 16  |
| MGAT2    | 4247   | Leukemia, MESH:D015470 | Dexameth     | 18.84 | 10  |
| MTAP     | 4507   | Leukemia, MESH:D015470 | Arsenic Tr   | 18.84 | 22  |
| NOC3L    | 64318  | Leukemia, MESH:D015470 | Dexameth     | 18.84 | 11  |
| NONO     | 4841   | Leukemia, MESH:D015470 | Dexameth     | 18.84 | 14  |
| PACSIN2  | 11252  | Leukemia, MESH:D015470 | Arsenic Tr   | 18.84 | 21  |
| PCSK1    | 5122   | Leukemia, MESH:D015470 | Arsenic Tr   | 18.84 | 27  |
| PPID     | 5481   | Leukemia, MESH:D015470 | Dexameth     | 18.84 | 12  |
| PPP1R14A | 94274  | Leukemia, MESH:D015470 | Decitabine   | 18.84 | 16  |
| PTPRB    | 5787   | Leukemia, MESH:D015470 | Doxorubic    | 18.84 | 15  |
| PTPRN2   | 5799   | Leukemia, MESH:D015470 | Arsenic Tr   | 18.84 | 16  |
| RBM33    | 155435 | Leukemia, MESH:D015470 | Doxorubic    | 18.84 | 15  |
| RBM8A    | 9939   | Leukemia, MESH:D015470 | Doxorubic    | 18.84 | 18  |
| RNF13    | 11342  | Leukemia, MESH:D015470 | Arsenic Tr   | 18.84 | 19  |
| SCN4B    | 6330   | Leukemia, MESH:D015470 | Arsenic Tr   | 18.84 | 27  |
| SYBU     | 55638  | Leukemia, MESH:D015470 | Calcitriol C | 18.84 | 11  |
| TGOLN2   | 10618  | Leukemia, MESH:D015470 | Arsenic Tr   | 18.84 | 33  |
| TMEM106  | 54664  | Leukemia, MESH:D015470 | Calcitriol C | 18.84 | 14  |

|          |        |                            |              |       |     |
|----------|--------|----------------------------|--------------|-------|-----|
| TMOD1    | 7111   | Leukemia, MESH:D015470     | Calcitriol E | 18.84 | 15  |
| TRAF5    | 7188   | Leukemia, MESH:D015470     | Arsenic Tr   | 18.84 | 14  |
| UQCRH    | 7388   | Leukemia, MESH:D015470     | Arsenic Tr   | 18.84 | 29  |
| ADIPOQ   | 9370   | Leukemia, MESH:D015473     | Arsenic Ar   | 18.83 | 170 |
| FBP1B    | 282672 | Leukemia, MESH:D015470     | Dexameth     | 18.83 | 7   |
| HOXB8    | 3218   | Leukemia, MESH:D015473     | arsenite C   | 18.83 | 155 |
| MAP2K2   | 5605   | Leukemia, MESH:D007948     | 2-(2-amin    | 18.83 | 3   |
| NAT16    | 375607 | Leukemia, MESH:D015470     | Dexameth     | 18.83 | 7   |
| PCDHGA3  | 56112  | Leukemia, MESH:D015470     | Dexameth     | 18.83 | 13  |
| PCED1B   | 91523  | Leukemia, MESH:D015473     | Arsenic Cy   | 18.83 | 158 |
| SGK1     | 6446   | Leukemia, MESH:D015473     | Arsenic Ar   | 18.83 | 265 |
| STAT3    | 6774   | Leukemia, MESH:D007948     | 2-(2-amin    | 18.83 | 3   |
| SYTL3    | 94120  | Leukemia, MESH:D015473     | Calcitriol M | 18.83 | 153 |
| ZBED10P  | 113763 | Leukemia, MESH:D015470     | Calcitriol ( | 18.83 | 7   |
| C3ORF33  | 285315 | Leukemia, MESH:D015470     | (+)-JQ1 c    | 18.82 | 7   |
| HECTD4   | 283450 | Leukemia, MESH:D015473     | arsenite D   | 18.82 | 155 |
| IQC�     | 80726  | Leukemia, MESH:D015470     | Dronabinc    | 18.82 | 7   |
| PRDX6    | 9588   | Leukemia, MESH:D015470     | Calcitriol E | 18.82 | 23  |
| SLC22A2  | 6582   | Leukemia, MESH:D015470     | Aclarubicin  | 18.82 | 16  |
| ST20-AS1 | 283687 | Leukemia, MESH:D015470     | Dexameth     | 18.82 | 7   |
| ZNF513   | 130557 | Leukemia, MESH:D015470     | Doxorubic    | 18.82 | 12  |
| ATP1B1   | 481    | Leukemia, MESH:D015473     | Arsenic Tr   | 18.81 | 263 |
| BAX      | 581    | Leukemia, MESH:D007948     | 2-(2-amin    | 18.81 | 4   |
| GATA4    | 2626   | Leukemia, MESH:D015473     | Arsenic Ar   | 18.81 | 266 |
| MYF5     | 4617   | Leukemia, MESH:D015473     | Dexameth     | 18.81 | 155 |
| SLC1A2   | 6506   | Leukemia, MESH:D007948     | 2-(2-amin    | 18.81 | 3   |
| SLCO2B1  | 11309  | Leukemia, MESH:D015473     | Arsenic Ar   | 18.81 | 162 |
| SOD2     | 6648   | Leukemia, MESH:D004915     | Daunorub     | 18.81 | 4   |
| TRUB1    | 142940 | Leukemia, MESH:D015473     | Arsenic Tr   | 18.81 | 262 |
| UCP1     | 7350   | Leukemia, MESH:D015473     | Arsenic Ar   | 18.81 | 264 |
| ARHGAP1  | 93663  | Leukemia, MESH:D015473     | Arsenic Tr   | 18.8  | 261 |
| CASP6    | 839    | Leukemia, MESH:D007948     | Arsenic Tr   | 18.8  | 3   |
| CYLD     | 1540   | Leukemia, MESH:D015473     | Arsenic Tr   | 18.8  | 261 |
| MMD      | 23531  | Leukemia, MESH:D015473     | Arsenic Tr   | 18.8  | 157 |
| SMAD6    | 4091   | Leukemia, MESH:D015473     | Arsenic Tr   | 18.8  | 264 |
| COL14A1  | 7373   | Leukemia, MESH:D015473     | Arsenic Tr   | 18.79 | 261 |
| ERCC2    | 2068   | Leukemia, MESH:D015473     | Arsenic Ar   | 18.79 | 265 |
| FGF9     | 2254   | Leukemia, MESH:D015470     | Dasatinib    | 18.79 | 15  |
| LOXL1    | 4016   | Leukemia, MESH:D015470     | Calcitriol E | 18.79 | 15  |
| MAP4     | 4134   | Leukemia, MESH:D015473     | Arsenic De   | 18.79 | 158 |
| MT1H     | 4496   | Leukemia, MESH:D015473     | Arsenic Ar   | 18.79 | 161 |
| PNP      | 4860   | Leukemia, MESH:D015470     | Arsenic Tr   | 18.79 | 21  |
| PXDN     | 7837   | Leukemia, MESH:D015473     | Arsenic Ar   | 18.79 | 159 |
| SLCO2B1  | 11309  | Leukemia, MESH:D015470     | Arsenic Tr   | 18.77 | 27  |
| ADORA3   | 140    | Leukemia, MESH:D015470     | Calcitriol E | 18.76 | 15  |
| FGFBP1   | 9982   | Leukemia, MESH:D015470     | Calcitriol ( | 18.76 | 10  |
| HEXIM1   | 10614  | Leukemia, MESH:D015470     | Doxorubic    | 18.76 | 15  |
| RBM5     | 10181  | Leukemia, MESH:D015470     | Air Polluta  | 18.76 | 17  |
| SLC2A9   | 56606  | Leukemia, MESH:D015470     | Allopurinc   | 18.76 | 12  |
| CBFB     | 865    | Leukemia, MESH:D01marker/m | Doxorubic    | 18.75 | 17  |
| ANKRD10  | 55608  | Leukemia, MESH:D015470     | Decitabine   | 18.75 | 31  |
| C2CD2    | 25966  | Leukemia, MESH:D015470     | Cytarabine   | 18.75 | 76  |
| CLMP     | 79827  | Leukemia, MESH:D015470     | Dexameth     | 18.75 | 13  |
| COBL     | 23242  | Leukemia, MESH:D015470     | Dexameth     | 18.75 | 22  |
| CSF2RA   | 1438   | Leukemia, MESH:D015470     | Benzene E    | 18.75 | 21  |
| DOCK10   | 55619  | Leukemia, MESH:D015470     | Dexameth     | 18.75 | 14  |
| EEF1E1   | 9521   | Leukemia, MESH:D015470     | Arsenic Tr   | 18.75 | 16  |
| ELK4     | 2005   | Leukemia, MESH:D015470     | Arsenic Tr   | 18.75 | 20  |

|         |        |                        |              |       |     |
|---------|--------|------------------------|--------------|-------|-----|
| ERN1    | 2081   | Leukemia, MESH:D015473 | Arsenic Tr   | 18.75 | 264 |
| FNBP1L  | 54874  | Leukemia, MESH:D015470 | Arsenic Tr   | 18.75 | 14  |
| GALNT10 | 55568  | Leukemia, MESH:D015470 | Cytarabine   | 18.75 | 81  |
| HOXA11  | 3207   | Leukemia, MESH:D015470 | Bortezomi    | 18.75 | 19  |
| HSPB7   | 27129  | Leukemia, MESH:D015470 | Dexameth     | 18.75 | 14  |
| IER5L   | 389792 | Leukemia, MESH:D015470 | Arsenic Tr   | 18.75 | 15  |
| LIMD1   | 8994   | Leukemia, MESH:D015470 | Arsenic Tr   | 18.75 | 16  |
| MANBA   | 4126   | Leukemia, MESH:D015470 | Decitabine   | 18.75 | 16  |
| MIR15A  | 406948 | Leukemia, MESH:D015470 | Arsenic Tr   | 18.75 | 20  |
| MYH14   | 79784  | Leukemia, MESH:D015470 | Calcitriol[C | 18.75 | 15  |
| PIAS1   | 8554   | Leukemia, MESH:D015470 | Arsenic Tr   | 18.75 | 16  |
| PXYLP1  | 92370  | Leukemia, MESH:D015470 | Dexameth     | 18.75 | 14  |
| RAP1B   | 5908   | Leukemia, MESH:D015470 | Arsenic Tr   | 18.75 | 22  |
| SH2D2A  | 9047   | Leukemia, MESH:D015470 | Benzene[C    | 18.75 | 23  |
| SORCS2  | 57537  | Leukemia, MESH:D015470 | Doxorubic    | 18.75 | 17  |
| SRP19   | 6728   | Leukemia, MESH:D015470 | Gasoline[Li  | 18.75 | 9   |
| TNFSF15 | 9966   | Leukemia, MESH:D015470 | Arsenic Tr   | 18.75 | 16  |
| TNRC6B  | 23112  | Leukemia, MESH:D015470 | Dexameth     | 18.75 | 11  |
| VAV2    | 7410   | Leukemia, MESH:D015470 | Arsenic Tr   | 18.75 | 22  |
| ZMYM3   | 9203   | Leukemia, MESH:D015470 | Dexameth     | 18.75 | 16  |
| BFSP1   | 631    | Leukemia, MESH:D015470 | (+)-JQ1 c    | 18.74 | 8   |
| CEP95   | 90799  | Leukemia, MESH:D015470 | Doxorubic    | 18.74 | 13  |
| DEAF1   | 10522  | Leukemia, MESH:D015470 | Bortezomi    | 18.74 | 14  |
| DMBT1   | 1755   | Leukemia, MESH:D015473 | Arsenic[Ge   | 18.74 | 161 |
| FAM120B | 84498  | Leukemia, MESH:D015470 | Decitabine   | 18.74 | 13  |
| GINS1   | 9837   | Leukemia, MESH:D015473 | Calcitriol[C | 18.74 | 155 |
| H4C14   | 8370   | Leukemia, MESH:D015470 | Decitabine   | 18.74 | 18  |
| KDM1B   | 221656 | Leukemia, MESH:D015470 | Air Polluta  | 18.74 | 12  |
| KHNYN   | 23351  | Leukemia, MESH:D015470 | Benzene[P    | 18.74 | 23  |
| MGA     | 23269  | Leukemia, MESH:D015470 | Doxorubic    | 18.74 | 18  |
| MOAP1   | 64112  | Leukemia, MESH:D015470 | Air Polluta  | 18.74 | 13  |
| NICN1   | 84276  | Leukemia, MESH:D015470 | Dexameth     | 18.74 | 12  |
| NIPAL4  | 348938 | Leukemia, MESH:D015470 | Air Polluta  | 18.74 | 14  |
| PDCD7   | 10081  | Leukemia, MESH:D015470 | Dexameth     | 18.74 | 12  |
| PSMC2   | 5701   | Leukemia, MESH:D015473 | Arsenic[ar   | 18.74 | 266 |
| SULT1C2 | 6819   | Leukemia, MESH:D015473 | Arsenic Tr   | 18.74 | 260 |
| TTC38   | 55020  | Leukemia, MESH:D015470 | Arsenic Tr   | 18.74 | 20  |
| VSTM4   | 196740 | Leukemia, MESH:D015470 | Calcitriol[C | 18.74 | 14  |
| ACOT7   | 11332  | Leukemia, MESH:D015473 | Arsenic[ar   | 18.73 | 160 |
| ADAMTSL | 92949  | Leukemia, MESH:D015470 | Dexameth     | 18.73 | 12  |
| ANKS6   | 203286 | Leukemia, MESH:D015470 | Doxorubic    | 18.73 | 13  |
| CDH11   | 1009   | Leukemia, MESH:D015473 | Arsenic[ar   | 18.73 | 160 |
| CKAP4   | 10970  | Leukemia, MESH:D015473 | Arsenic[Ar   | 18.73 | 262 |
| FAN1    | 22909  | Leukemia, MESH:D015470 | Dexameth     | 18.73 | 13  |
| GNAO1   | 2775   | Leukemia, MESH:D015473 | Arsenic[ar   | 18.73 | 158 |
| GNE     | 10020  | Leukemia, MESH:D015473 | Arsenic[Ar   | 18.73 | 265 |
| LAMA1   | 284217 | Leukemia, MESH:D015473 | Arsenic[ar   | 18.73 | 158 |
| LPCAT1  | 79888  | Leukemia, MESH:D015473 | Arsenic[Ar   | 18.73 | 265 |
| LTBP2   | 4053   | Leukemia, MESH:D015473 | Arsenic[ar   | 18.73 | 12  |
| MAP2K3  | 5606   | Leukemia, MESH:D004915 | Daunorub     | 18.73 | 2   |
| MAP3K9  | 4293   | Leukemia, MESH:D015470 | Doxorubic    | 18.73 | 14  |
| MMP8    | 4317   | Leukemia, MESH:D015473 | Arsenic[ar   | 18.73 | 158 |
| PEX11A  | 8800   | Leukemia, MESH:D015470 | Dexameth     | 18.73 | 12  |
| PF4     | 5196   | Leukemia, MESH:D015470 | Benzene[C    | 18.73 | 32  |
| PGD     | 5226   | Leukemia, MESH:D015473 | Antimony     | 18.73 | 267 |
| PLEKHF1 | 79156  | Leukemia, MESH:D015473 | Arsenic[ar   | 18.73 | 13  |
| PRDM15  | 63977  | Leukemia, MESH:D015470 | Doxorubic    | 18.73 | 13  |
| SEMA6D  | 80031  | Leukemia, MESH:D015473 | Arsenic Tr   | 18.73 | 263 |

|          |        |                        |              |       |     |
|----------|--------|------------------------|--------------|-------|-----|
| TALDO1   | 6888   | Leukemia, MESH:D015470 | Arsenic Tr   | 18.73 | 22  |
| TMEM245  | 23731  | Leukemia, MESH:D015470 | Arsenic Tr   | 18.73 | 18  |
| TPR      | 7175   | Leukemia, MESH:D015473 | Dexameth     | 18.73 | 159 |
| TRABD    | 80305  | Leukemia, MESH:D015470 | Dexameth     | 18.73 | 9   |
| UNC5D    | 137970 | Leukemia, MESH:D015470 | Arsenic Tr   | 18.73 | 18  |
| CASP2    | 835    | Leukemia, MESH:D007948 | Arsenic Tr   | 18.72 | 3   |
| CKM      | 1158   | Leukemia, MESH:D004915 | Daunorub     | 18.72 | 3   |
| JUND     | 3727   | Leukemia, MESH:D007948 | Arsenic Tr   | 18.72 | 3   |
| MRPS16   | 51021  | Leukemia, MESH:D015473 | Arsenic Tr   | 18.72 | 158 |
| NR1H3    | 10062  | Leukemia, MESH:D007948 | Arsenic Tr   | 18.72 | 3   |
| PPM1M    | 132160 | Leukemia, MESH:D015473 | Calcitriol C | 18.72 | 156 |
| S100A6   | 6277   | Leukemia, MESH:D015470 | Arsenic Tr   | 18.72 | 28  |
| SCARF2   | 91179  | Leukemia, MESH:D015473 | Arsenic Ar   | 18.72 | 262 |
| CEP63    | 80254  | Leukemia, MESH:D015473 | Arsenic Ca   | 18.71 | 10  |
| CHML     | 1122   | Leukemia, MESH:D015473 | Arsenic Ar   | 18.71 | 264 |
| HNRNPUL  | 221092 | Leukemia, MESH:D015473 | Dexameth     | 18.71 | 7   |
| IPO13    | 9670   | Leukemia, MESH:D015473 | Calcitriol C | 18.71 | 154 |
| MRPL48   | 51642  | Leukemia, MESH:D015473 | arsenite D   | 18.71 | 155 |
| PROM2    | 150696 | Leukemia, MESH:D015473 | Arsenic Ca   | 18.71 | 158 |
| SDR16C5  | 195814 | Leukemia, MESH:D015473 | Arsenic ar:  | 18.71 | 157 |
| SOX1     | 6656   | Leukemia, MESH:D015473 | Arsenic Ar   | 18.71 | 261 |
| TRAPPC1C | 7109   | Leukemia, MESH:D015473 | Arsenic ar:  | 18.71 | 12  |
| SCML2    | 10389  | Leukemia, MESH:D015473 | Calcitriol C | 18.7  | 156 |
| SLC35F3  | 148641 | Leukemia, MESH:D015473 | arsenite D   | 18.7  | 155 |
| STAT5B   | 6777   | Leukemia, MESH:D015473 | Arsenic Tr   | 18.7  | 265 |
| BCL6     | 604    | Leukemia, MESH:D015473 | Arsenic Ar   | 18.69 | 264 |
| HP       | 3240   | Leukemia, MESH:D015473 | alpha-Toc    | 18.69 | 157 |
| CEMIP    | 57214  | Leukemia, MESH:D015473 | Arsenic Ca   | 18.68 | 20  |
| DACT1    | 51339  | Leukemia, MESH:D015473 | Arsenic Tr   | 18.68 | 261 |
| GGH      | 8836   | Leukemia, MESH:D015473 | Arsenic Tr   | 18.68 | 156 |
| GZMA     | 3001   | Leukemia, MESH:D015473 | Arsenic Tr   | 18.68 | 154 |
| TIMELESS | 8914   | Leukemia, MESH:D015473 | Arsenic Tr   | 18.68 | 263 |
| TRIO     | 7204   | Leukemia, MESH:D015473 | arsenite D   | 18.68 | 160 |
| ACOX1    | 51     | Leukemia, MESH:D015473 | Arsenic Tr   | 18.67 | 261 |
| ATP5F1B  | 506    | Leukemia, MESH:D015470 | Decitabine   | 18.67 | 21  |
| HAT1     | 8520   | Leukemia, MESH:D015473 | Arsenic Ar   | 18.67 | 265 |
| LIPC     | 3990   | Leukemia, MESH:D015470 | Bezafibrat   | 18.67 | 15  |
| MLLT11   | 10962  | Leukemia, MESH:D015473 | Arsenic Tr   | 18.67 | 262 |
| POLR3G   | 10622  | Leukemia, MESH:D015470 | Calcitriol C | 18.67 | 9   |
| PRKCQ    | 5588   | Leukemia, MESH:D015473 | Arsenic ar:  | 18.67 | 159 |
| QSOX1    | 5768   | Leukemia, MESH:D015473 | Arsenic Tr   | 18.67 | 263 |
| RASL11A  | 387496 | Leukemia, MESH:D015470 | Alitretinoi  | 18.67 | 10  |
| SAA1     | 6288   | Leukemia, MESH:D015470 | Bortezomi    | 18.67 | 14  |
| SCN1B    | 6324   | Leukemia, MESH:D015470 | Calcitriol C | 18.67 | 18  |
| SLC12A6  | 9990   | Leukemia, MESH:D015470 | Cytarabine   | 18.67 | 82  |
| SPRED1   | 161742 | Leukemia, MESH:D015470 | Doxorubic    | 18.67 | 17  |
| SPRY1    | 10252  | Leukemia, MESH:D015473 | arsenite D   | 18.67 | 158 |
| SSX2IP   | 117178 | Leukemia, MESH:D015470 | Azacitidine  | 18.67 | 16  |
| TINF2    | 26277  | Leukemia, MESH:D015470 | Benzene C    | 18.67 | 35  |
| TMEM176  | 55365  | Leukemia, MESH:D015470 | Calcitriol F | 18.67 | 10  |
| TNIP1    | 10318  | Leukemia, MESH:D015473 | Arsenic De   | 18.67 | 158 |
| CITED2   | 10370  | Leukemia, MESH:D015473 | Arsenic Ar   | 18.66 | 266 |
| COL10A1  | 1300   | Leukemia, MESH:D015470 | Dexameth     | 18.66 | 12  |
| EMX2     | 2018   | Leukemia, MESH:D015470 | Dexameth     | 18.66 | 9   |
| EPPK1    | 83481  | Leukemia, MESH:D015470 | Calcitriol C | 18.66 | 13  |
| GCNT1    | 2650   | Leukemia, MESH:D015470 | Calcitriol C | 18.66 | 11  |
| GNAZ     | 2781   | Leukemia, MESH:D015470 | Benzene C    | 18.66 | 23  |
| JARID2   | 3720   | Leukemia, MESH:D015470 | Arsenic Tr   | 18.66 | 21  |

|          |        |                        |              |       |     |
|----------|--------|------------------------|--------------|-------|-----|
| NBL1     | 4681   | Leukemia, MESH:D015470 | Calcitriol C | 18.66 | 16  |
| NDUFA1   | 4694   | Leukemia, MESH:D015470 | Doxorubic    | 18.66 | 15  |
| NIN      | 51199  | Leukemia, MESH:D015470 | Dexameth     | 18.66 | 13  |
| PDGFD    | 80310  | Leukemia, MESH:D015470 | Dexameth     | 18.66 | 13  |
| PLXND1   | 23129  | Leukemia, MESH:D015470 | Dexameth     | 18.66 | 15  |
| PREX1    | 57580  | Leukemia, MESH:D015470 | Dexameth     | 18.66 | 14  |
| PTPN21   | 11099  | Leukemia, MESH:D015470 | Arsenic Tr   | 18.66 | 23  |
| RAB6A    | 5870   | Leukemia, MESH:D015470 | Dexameth     | 18.66 | 15  |
| RBMS3    | 27303  | Leukemia, MESH:D015470 | Dexameth     | 18.66 | 15  |
| SSPN     | 8082   | Leukemia, MESH:D015470 | Calcitriol C | 18.66 | 9   |
| TBC1D1   | 23216  | Leukemia, MESH:D015470 | Calcitriol C | 18.66 | 9   |
| YPEL3    | 83719  | Leukemia, MESH:D015470 | Dexameth     | 18.66 | 10  |
| GRIN1    | 2902   | Leukemia, MESH:D007948 | 2-(2-amin    | 18.65 | 3   |
| COMT     | 1312   | Leukemia, MESH:D015473 | arsenite C   | 18.64 | 158 |
| NR1I3    | 9970   | Leukemia, MESH:D015473 | arsenite C   | 18.64 | 158 |
| PLA2G4A  | 5321   | Leukemia, MESH:D007948 | 2-(2-amin    | 18.63 | 3   |
| DEPDC1B  | 55789  | Leukemia, MESH:D015473 | Arsenic Ca   | 18.62 | 156 |
| MAPK8    | 5599   | Leukemia, MESH:D007948 | 2-(2-amin    | 18.62 | 3   |
| MIR23A   | 407010 | Leukemia, MESH:D015473 | Arsenic Tr   | 18.62 | 261 |
| NAV2     | 89797  | Leukemia, MESH:D015473 | Arsenic ar   | 18.62 | 160 |
| PPFIBP1  | 8496   | Leukemia, MESH:D015473 | arsenite C   | 18.62 | 154 |
| TP53TG1  | 11257  | Leukemia, MESH:D015470 | Daunorub     | 18.62 | 38  |
| ATP5C1   | 11949  | Leukemia, MESH:D015470 | Dexameth     | 18.61 | 22  |
| CCDC15   | 80071  | Leukemia, MESH:D015470 | Calcitriol C | 18.61 | 74  |
| CLMN     | 79789  | Leukemia, MESH:D015473 | Arsenic Ca   | 18.61 | 157 |
| CNGB1    | 1258   | Leukemia, MESH:D015470 | Calcitriol C | 18.61 | 13  |
| CYP4X1   | 260293 | Leukemia, MESH:D015470 | Calcitriol C | 18.61 | 75  |
| EDNRB    | 1910   | Leukemia, MESH:D007948 | 2-(2-amin    | 18.61 | 2   |
| HNRNPAE  | 3182   | Leukemia, MESH:D015473 | Dexameth     | 18.61 | 155 |
| HOXB8    | 3218   | Leukemia, MESH:D015470 | Cytarabine   | 18.61 | 78  |
| HPCAL1   | 3241   | Leukemia, MESH:D015473 | Arsenic Ar   | 18.61 | 263 |
| KIR2DS4  | 3809   | Leukemia, MESH:D015470 | Azacitidine  | 18.61 | 7   |
| MRPL57   | 78988  | Leukemia, MESH:D015470 | Arsenic Tr   | 18.61 | 19  |
| MYF5     | 4617   | Leukemia, MESH:D015470 | Azacitidine  | 18.61 | 11  |
| NLRP1    | 22861  | Leukemia, MESH:D015473 | Arsenic Tr   | 18.61 | 157 |
| PCED1B   | 91523  | Leukemia, MESH:D015470 | Cytarabine   | 18.61 | 78  |
| POGZ     | 23126  | Leukemia, MESH:D015470 | Dexameth     | 18.61 | 15  |
| TM2D3    | 80213  | Leukemia, MESH:D015470 | Bortezomi    | 18.61 | 14  |
| VBP1     | 7411   | Leukemia, MESH:D015470 | Bezafibrat   | 18.61 | 13  |
| ZZEF1    | 23140  | Leukemia, MESH:D015470 | Cyclophos    | 18.61 | 9   |
| ADSS1    | 122622 | Leukemia, MESH:D015470 | Dexameth     | 18.6  | 12  |
| APOBEC3I | 200316 | Leukemia, MESH:D015470 | Azacitidine  | 18.6  | 21  |
| ATP23    | 91419  | Leukemia, MESH:D015470 | Calcitriol M | 18.6  | 10  |
| CCDC167  | 154467 | Leukemia, MESH:D015470 | Decitabine   | 18.6  | 14  |
| CCDC88B  | 283234 | Leukemia, MESH:D015473 | Arsenic Ge   | 18.6  | 157 |
| CDH15    | 1013   | Leukemia, MESH:D015470 | Dexameth     | 18.6  | 7   |
| CNPY4    | 245812 | Leukemia, MESH:D015470 | Dexameth     | 18.6  | 12  |
| CPSF1    | 29894  | Leukemia, MESH:D015473 | arsenite D   | 18.6  | 9   |
| CXXC1    | 30827  | Leukemia, MESH:D015470 | Dexameth     | 18.6  | 13  |
| CYB5R4   | 51167  | Leukemia, MESH:D015470 | Calcitriol C | 18.6  | 13  |
| FAP      | 2191   | Leukemia, MESH:D015470 | Arsenic Tr   | 18.6  | 14  |
| FOXN4    | 121643 | Leukemia, MESH:D015470 | Indometha    | 18.6  | 8   |
| GAREM1   | 64762  | Leukemia, MESH:D015470 | Arsenic Tr   | 18.6  | 18  |
| GBE1     | 2632   | Leukemia, MESH:D015470 | Deferoxan    | 18.6  | 16  |
| GREB1L   | 80000  | Leukemia, MESH:D015473 | arsenite G   | 18.6  | 154 |
| H3C10    | 8357   | Leukemia, MESH:D015470 | Arsenic Tr   | 18.6  | 20  |
| KCNQ4    | 9132   | Leukemia, MESH:D015470 | Cyclophos    | 18.6  | 8   |
| LRRC32   | 2615   | Leukemia, MESH:D015470 | Cytarabine   | 18.6  | 80  |

|          |        |                        |              |       |     |
|----------|--------|------------------------|--------------|-------|-----|
| LSM7     | 51690  | Leukemia, MESH:D015470 | Dexameth     | 18.6  | 12  |
| MAMLD1   | 10046  | Leukemia, MESH:D015470 | Calcitriol[C | 18.6  | 12  |
| MIR143   | 406935 | Leukemia, MESH:D015473 | Arsenic[Ar   | 18.6  | 264 |
| MIR20A   | 406982 | Leukemia, MESH:D015473 | Calcitriol[C | 18.6  | 7   |
| MMP2     | 4313   | Leukemia, MESH:D007948 | 2-(2-amin    | 18.6  | 3   |
| MORF4L1  | 10933  | Leukemia, MESH:D015470 | Dexameth     | 18.6  | 13  |
| NDUFAF2  | 91942  | Leukemia, MESH:D015470 | Dexameth     | 18.6  | 13  |
| PCID2    | 55795  | Leukemia, MESH:D015470 | Dronabinc    | 18.6  | 8   |
| PPT2     | 9374   | Leukemia, MESH:D015470 | Cytarabine   | 18.6  | 79  |
| PSMG4    | 389362 | Leukemia, MESH:D015470 | Gasoline[C   | 18.6  | 11  |
| RBM3     | 5935   | Leukemia, MESH:D015470 | Dexameth     | 18.6  | 16  |
| SENP5    | 205564 | Leukemia, MESH:D015470 | Doxorubic    | 18.6  | 15  |
| SGCE     | 8910   | Leukemia, MESH:D015470 | Cyclophos    | 18.6  | 15  |
| SLAIN2   | 57606  | Leukemia, MESH:D015470 | Dexameth     | 18.6  | 10  |
| SNX27    | 81609  | Leukemia, MESH:D015470 | Dexameth     | 18.6  | 9   |
| SYNE3    | 161176 | Leukemia, MESH:D015473 | Arsenic[De   | 18.6  | 156 |
| VPS28    | 51160  | Leukemia, MESH:D015470 | Doxorubic    | 18.6  | 13  |
| ZCCHC8   | 55596  | Leukemia, MESH:D015470 | Dronabinc    | 18.6  | 10  |
| ACBD7    | 414149 | Leukemia, MESH:D015473 | Arsenic[Ca   | 18.59 | 156 |
| APOL6    | 80830  | Leukemia, MESH:D015473 | arsenite[D   | 18.59 | 155 |
| IFT172   | 26160  | Leukemia, MESH:D015473 | Arsenic Tr   | 18.59 | 262 |
| L3MBTL1  | 26013  | Leukemia, MESH:D015470 | Dexameth     | 18.59 | 12  |
| PACC1    | 55248  | Leukemia, MESH:D015473 | arsenite[D   | 18.59 | 154 |
| ABTB2    | 25841  | Leukemia, MESH:D015470 | Doxorubic    | 18.58 | 17  |
| ADRB1    | 153    | Leukemia, MESH:D015473 | arsenite[D   | 18.58 | 10  |
| CDS1     | 1040   | Leukemia, MESH:D015470 | Arsenic Tr   | 18.58 | 21  |
| DDX1     | 1653   | Leukemia, MESH:D015470 | Arsenic Tr   | 18.58 | 17  |
| FLOT2    | 2319   | Leukemia, MESH:D015470 | Dexameth     | 18.58 | 16  |
| GH1      | 2688   | Leukemia, MESH:D015473 | Arsenic Tr   | 18.58 | 262 |
| HELZ2    | 85441  | Leukemia, MESH:D015470 | Decitabine   | 18.58 | 20  |
| HINT1    | 3094   | Leukemia, MESH:D015470 | Benzene[C    | 18.58 | 31  |
| IFRD2    | 7866   | Leukemia, MESH:D015470 | Bortezomi    | 18.58 | 13  |
| KDM7A    | 80853  | Leukemia, MESH:D015470 | Arsenic Tr   | 18.58 | 22  |
| KHDRBS1  | 10657  | Leukemia, MESH:D015470 | Irinotecan   | 18.58 | 12  |
| KPNA7    | 402569 | Leukemia, MESH:D015470 | Indometha    | 18.58 | 6   |
| LIMK1    | 3984   | Leukemia, MESH:D015470 | Benzene[C    | 18.58 | 29  |
| LRP6     | 4040   | Leukemia, MESH:D015470 | (+)-JQ1 c    | 18.58 | 12  |
| NDUFB2   | 4708   | Leukemia, MESH:D015470 | Arsenic Tr   | 18.58 | 20  |
| NEFH     | 4744   | Leukemia, MESH:D015473 | alpha-Toc    | 18.58 | 160 |
| PCDH18   | 54510  | Leukemia, MESH:D015470 | Azacididin   | 18.58 | 16  |
| PIK3R5   | 23533  | Leukemia, MESH:D015470 | Air Polluta  | 18.58 | 22  |
| PLOD3    | 8985   | Leukemia, MESH:D015470 | Cyclophos    | 18.58 | 14  |
| PTBP3    | 9991   | Leukemia, MESH:D015470 | Arsenic Tr   | 18.58 | 20  |
| SEPHS2   | 22928  | Leukemia, MESH:D015470 | Arsenic Tr   | 18.58 | 24  |
| SUZ12    | 23512  | Leukemia, MESH:D015470 | Dexameth     | 18.58 | 13  |
| TRPC3    | 7222   | Leukemia, MESH:D015470 | Arsenic Tr   | 18.58 | 20  |
| TUBA8    | 51807  | Leukemia, MESH:D015470 | Arsenic Tr   | 18.58 | 19  |
| CGNL1    | 84952  | Leukemia, MESH:D015470 | Arsenic Tr   | 18.57 | 19  |
| CLIC3    | 9022   | Leukemia, MESH:D015470 | Arsenic Tr   | 18.57 | 14  |
| DAD1     | 1603   | Leukemia, MESH:D015470 | Arsenic Tr   | 18.57 | 19  |
| DSCC1    | 79075  | Leukemia, MESH:D015470 | Calcitriol[C | 18.57 | 15  |
| HNRNPC   | 3183   | Leukemia, MESH:D015473 | arsenic dis  | 18.57 | 155 |
| KPNB1    | 3837   | Leukemia, MESH:D015473 | Buthionine   | 18.57 | 156 |
| MIR4435- | 541471 | Leukemia, MESH:D015470 | Doxorubic    | 18.57 | 12  |
| PHF20L1  | 51105  | Leukemia, MESH:D015470 | Dexameth     | 18.57 | 9   |
| RSL1D1   | 26156  | Leukemia, MESH:D015470 | Arsenic Tr   | 18.57 | 19  |
| SLC6A15  | 55117  | Leukemia, MESH:D015470 | Dronabinc    | 18.57 | 9   |
| TFF1     | 7031   | Leukemia, MESH:D007948 | 2-(2-amin    | 18.57 | 3   |

|          |        |                        |              |       |     |
|----------|--------|------------------------|--------------|-------|-----|
| TNRC18   | 84629  | Leukemia, MESH:D015470 | Doxorubic    | 18.57 | 15  |
| CREBRF   | 153222 | Leukemia, MESH:D015473 | Arsenic ar:  | 18.56 | 158 |
| CRIP1    | 1396   | Leukemia, MESH:D015473 | Arsenic Ar   | 18.56 | 159 |
| DKK3     | 27122  | Leukemia, MESH:D015473 | Arsenic Ar   | 18.56 | 263 |
| EIF3A    | 8661   | Leukemia, MESH:D015473 | arsenite D   | 18.56 | 158 |
| RBBP4    | 5928   | Leukemia, MESH:D015473 | Arsenic Tr   | 18.56 | 265 |
| TBL1XR1  | 79718  | Leukemia, MESH:D015473 | Arsenic ar:  | 18.56 | 14  |
| DLAT     | 1737   | Leukemia, MESH:D015473 | arsenite D   | 18.55 | 157 |
| CCR1     | 1230   | Leukemia, MESH:D015470 | Arsenic Tr   | 18.54 | 21  |
| CSRN1P1  | 64651  | Leukemia, MESH:D015470 | Calcitriol C | 18.54 | 16  |
| CSRP2    | 1466   | Leukemia, MESH:D015470 | Arsenic Tr   | 18.54 | 20  |
| EEF2     | 1938   | Leukemia, MESH:D015473 | Arsenic Tr   | 18.54 | 164 |
| EPCAM    | 4072   | Leukemia, MESH:D015473 | Arsenic Ar   | 18.54 | 264 |
| GNAS     | 2778   | Leukemia, MESH:D015473 | arsenite Cl  | 18.54 | 157 |
| IER2     | 9592   | Leukemia, MESH:D015470 | Arsenic Tr   | 18.54 | 33  |
| SLC2A4   | 6517   | Leukemia, MESH:D015473 | Arsenic ar:  | 18.54 | 161 |
| HACL1    | 26061  | Leukemia, MESH:D015473 | Arsenic Tr   | 18.52 | 260 |
| CD163    | 9332   | Leukemia, MESH:D015473 | arsenite B   | 18.51 | 10  |
| HNF4A    | 3172   | Leukemia, MESH:D015473 | Calcitriol C | 18.51 | 156 |
| KLHL14   | 57565  | Leukemia, MESH:D015473 | Arsenic Tr   | 18.51 | 260 |
| MAPK11   | 5600   | Leukemia, MESH:D015473 | Arsenic Tr   | 18.51 | 155 |
| MIR146B  | 574447 | Leukemia, MESH:D015473 | Arsenic Tr   | 18.51 | 261 |
| NR1D1    | 9572   | Leukemia, MESH:D015473 | arsenite D   | 18.51 | 155 |
| OTPA     | 560759 | Leukemia, MESH:D015470 | Dronabinc    | 18.51 | 6   |
| PRKAA1   | 5562   | Leukemia, MESH:D015473 | Arsenic Tr   | 18.51 | 158 |
| VIT      | 5212   | Leukemia, MESH:D015473 | Arsenic Tr   | 18.51 | 153 |
| ELAPOR1  | 57535  | Leukemia, MESH:D015473 | Calcitriol C | 18.5  | 155 |
| ETV4     | 2118   | Leukemia, MESH:D015473 | Arsenic Tr   | 18.5  | 262 |
| IL10RA   | 3587   | Leukemia, MESH:D015473 | Arsenic De   | 18.5  | 156 |
| INCENP   | 3619   | Leukemia, MESH:D015473 | Arsenic ar:  | 18.5  | 160 |
| KLHL41B  | 321064 | Leukemia, MESH:D015470 | Dexameth     | 18.5  | 6   |
| LGALS9   | 3965   | Leukemia, MESH:D015470 | Allopurinc   | 18.5  | 16  |
| MYBBP1A  | 10514  | Leukemia, MESH:D015473 | Arsenic Tr   | 18.5  | 261 |
| NFATC2   | 4773   | Leukemia, MESH:D015473 | Arsenic ar:  | 18.5  | 158 |
| SNORA72  | 26775  | Leukemia, MESH:D015470 | Doxorubic    | 18.5  | 11  |
| TLR1     | 7096   | Leukemia, MESH:D015473 | Arsenic ar:  | 18.5  | 157 |
| TPT1     | 7178   | Leukemia, MESH:D015473 | Arsenic Tr   | 18.5  | 263 |
| ATL2     | 64225  | Leukemia, MESH:D015470 | Doxorubic    | 18.49 | 18  |
| CASP8AP2 | 9994   | Leukemia, MESH:D015470 | Arsenic Tr   | 18.49 | 23  |
| GLRX5    | 51218  | Leukemia, MESH:D015473 | arsenite G   | 18.49 | 156 |
| HDDC2    | 51020  | Leukemia, MESH:D015473 | Arsenic ar:  | 18.49 | 157 |
| HDGF     | 3068   | Leukemia, MESH:D015470 | Doxorubic    | 18.49 | 15  |
| IRF4     | 3662   | Leukemia, MESH:D015470 | Arsenic Tr   | 18.49 | 17  |
| LAT2     | 7462   | Leukemia, MESH:D015470 | Arsenic Tr   | 18.49 | 14  |
| LTC4S    | 4056   | Leukemia, MESH:D015470 | Air Polluta  | 18.49 | 18  |
| MED13L   | 23389  | Leukemia, MESH:D015470 | Cyclophos    | 18.49 | 16  |
| NUP50    | 10762  | Leukemia, MESH:D015470 | Dexameth     | 18.49 | 15  |
| PCOLCE2  | 26577  | Leukemia, MESH:D015470 | Arsenic Tr   | 18.49 | 15  |
| PRPF4B   | 8899   | Leukemia, MESH:D015470 | Indometha    | 18.49 | 14  |
| RHPN2    | 85415  | Leukemia, MESH:D015470 | Calcitriol C | 18.49 | 83  |
| SLC26A2  | 1836   | Leukemia, MESH:D015470 | Dronabinc    | 18.49 | 13  |
| SPTLC1   | 10558  | Leukemia, MESH:D015473 | Arsenic Tr   | 18.49 | 155 |
| STARD10  | 10809  | Leukemia, MESH:D015470 | Doxorubic    | 18.49 | 14  |
| TECR     | 9524   | Leukemia, MESH:D015470 | Air Polluta  | 18.49 | 34  |
| ZCCHC7   | 84186  | Leukemia, MESH:D015470 | Dexameth     | 18.49 | 15  |
| ACAT2    | 39     | Leukemia, MESH:D015470 | Arsenic Tr   | 18.48 | 23  |
| NEFH     | 4744   | Leukemia, MESH:D015470 | Alitretinoi  | 18.48 | 28  |
| RAB2B    | 84932  | Leukemia, MESH:D015470 | Arsenic Tr   | 18.48 | 34  |



|          |        |                        |              |       |     |
|----------|--------|------------------------|--------------|-------|-----|
| TCP1     | 6950   | Leukemia, MESH:D015470 | Air Polluta  | 18.48 | 26  |
| TUBB3    | 10381  | Leukemia, MESH:D015473 | 2-(2-chlor   | 18.48 | 161 |
| ANKRD13. | 88455  | Leukemia, MESH:D015470 | Dexameth     | 18.47 | 8   |
| ARHGEF5  | 7984   | Leukemia, MESH:D015470 | Gasoline[(   | 18.47 | 8   |
| ARSI     | 340075 | Leukemia, MESH:D015470 | Calcitriol[C | 18.47 | 8   |
| CARF     | 79800  | Leukemia, MESH:D015470 | Indometha    | 18.47 | 9   |
| CEP63    | 80254  | Leukemia, MESH:D015470 | Calcitriol[C | 18.47 | 12  |
| CRYBA4   | 1413   | Leukemia, MESH:D015470 | Dronabinc    | 18.47 | 8   |
| CYP27A1  | 1593   | Leukemia, MESH:D015473 | Arsenic[Ca   | 18.47 | 21  |
| EVA1C    | 59271  | Leukemia, MESH:D015470 | Dexameth     | 18.47 | 12  |
| GPR153   | 387509 | Leukemia, MESH:D015470 | Calcitriol[E | 18.47 | 8   |
| KIF26A   | 26153  | Leukemia, MESH:D015470 | Calcitriol[C | 18.47 | 13  |
| L3HYPDH  | 112849 | Leukemia, MESH:D015470 | Calcitriol[C | 18.47 | 8   |
| MAF1     | 84232  | Leukemia, MESH:D015470 | Bortezomi    | 18.47 | 13  |
| MCTP2    | 55784  | Leukemia, MESH:D015470 | Air Polluta  | 18.47 | 15  |
| MED12    | 9968   | Leukemia, MESH:D015470 | Dexameth     | 18.47 | 13  |
| MRPL48   | 51642  | Leukemia, MESH:D015470 | Dexameth     | 18.47 | 12  |
| MYL6B    | 140465 | Leukemia, MESH:D015470 | Decitabine   | 18.47 | 15  |
| NGRN     | 51335  | Leukemia, MESH:D015470 | Air Polluta  | 18.47 | 14  |
| NKAIN4   | 128414 | Leukemia, MESH:D015470 | Dexameth     | 18.47 | 9   |
| PAIP2    | 51247  | Leukemia, MESH:D015470 | Dexameth     | 18.47 | 8   |
| PLD6     | 201164 | Leukemia, MESH:D015470 | (+)-JQ1 c    | 18.47 | 8   |
| PROM2    | 150696 | Leukemia, MESH:D015470 | Calcitriol[( | 18.47 | 10  |
| PUS7L    | 83448  | Leukemia, MESH:D015470 | Doxorubic    | 18.47 | 13  |
| RBM28    | 55131  | Leukemia, MESH:D015470 | Dexameth     | 18.47 | 10  |
| SCARF2   | 91179  | Leukemia, MESH:D015470 | Arsenic Tr   | 18.47 | 15  |
| SMYD1    | 150572 | Leukemia, MESH:D015470 | Dexameth     | 18.47 | 12  |
| SSH2     | 85464  | Leukemia, MESH:D015470 | Dexameth     | 18.47 | 15  |
| TMEM243  | 79161  | Leukemia, MESH:D015470 | Arsenic Tr   | 18.47 | 18  |
| TMEM40   | 55287  | Leukemia, MESH:D015470 | Benzene[C    | 18.47 | 23  |
| TRMT12   | 55039  | Leukemia, MESH:D015470 | Dexameth     | 18.47 | 12  |
| ZBTB8OS  | 339487 | Leukemia, MESH:D015470 | Dexameth     | 18.47 | 13  |
| COX20    | 116228 | Leukemia, MESH:D015470 | Dexameth     | 18.46 | 13  |
| DCLK2    | 166614 | Leukemia, MESH:D015470 | Dronabinc    | 18.46 | 8   |
| DIRAS1   | 148252 | Leukemia, MESH:D015470 | Dexameth     | 18.46 | 12  |
| HGH1     | 51236  | Leukemia, MESH:D015470 | Dexameth     | 18.46 | 12  |
| IL5      | 3567   | Leukemia, MESH:D015473 | Dasatinib    | 18.46 | 155 |
| NHS      | 4810   | Leukemia, MESH:D015470 | Calcitriol[C | 18.46 | 13  |
| NT5DC1   | 221294 | Leukemia, MESH:D015470 | Doxorubic    | 18.46 | 13  |
| QTRT2    | 79691  | Leukemia, MESH:D015470 | Dexameth     | 18.46 | 13  |
| SCML2    | 10389  | Leukemia, MESH:D015470 | Calcitriol[C | 18.46 | 10  |
| SETD3    | 84193  | Leukemia, MESH:D015470 | Dexameth     | 18.46 | 12  |
| TMEM120  | 144404 | Leukemia, MESH:D015470 | Doxorubic    | 18.46 | 15  |
| TPD52    | 7163   | Leukemia, MESH:D015473 | Arsenic Tr   | 18.46 | 264 |
| TTLL1    | 25809  | Leukemia, MESH:D015470 | Doxorubic    | 18.46 | 13  |
| ZBTB46   | 140685 | Leukemia, MESH:D015470 | Decitabine   | 18.46 | 19  |
| CDH3     | 1001   | Leukemia, MESH:D015473 | Arsenic[ar   | 18.45 | 160 |
| EIF2S2   | 8894   | Leukemia, MESH:D015473 | arsenite[Ci  | 18.45 | 155 |
| AHSG     | 197    | Leukemia, MESH:D015473 | Dexameth     | 18.44 | 155 |
| AQP7     | 364    | Leukemia, MESH:D015473 | arsenite[D   | 18.44 | 159 |
| BIRC2    | 329    | Leukemia, MESH:D007948 | Arsenic Tr   | 18.44 | 3   |
| CLCF1    | 23529  | Leukemia, MESH:D015473 | Arsenic[Ca   | 18.44 | 13  |
| ELAVL1   | 1994   | Leukemia, MESH:D015473 | Arsenic Tr   | 18.44 | 261 |
| ETFB     | 2109   | Leukemia, MESH:D015473 | Arsenic[Ar   | 18.44 | 161 |
| TFAP2A   | 7020   | Leukemia, MESH:D004915 | Cytarabine   | 18.44 | 2   |
| TSHB     | 7252   | Leukemia, MESH:D015470 | 15-deoxy-    | 18.44 | 19  |
| CYBA     | 1535   | Leukemia, MESH:D007948 | Arsenic Tr   | 18.43 | 4   |
| COG3     | 83548  | Leukemia, MESH:D015473 | arsenic dis  | 18.42 | 7   |

|          |        |                            |              |       |     |
|----------|--------|----------------------------|--------------|-------|-----|
| DLD      | 1738   | Leukemia, MESH:D015470     | Dexameth     | 18.42 | 16  |
| DMRT1    | 1761   | Leukemia, MESH:D015473     | caffeic aci  | 18.42 | 151 |
| IFITM1   | 8519   | Leukemia, MESH:D004915     | Doxorubic    | 18.42 | 3   |
| KRT10    | 3858   | Leukemia, MESH:D015470     | Alitretinoi  | 18.42 | 15  |
| MIR10A   | 406902 | Leukemia, MESH:D015473     | Arsenic ar   | 18.42 | 263 |
| RTN4     | 57142  | Leukemia, MESH:D015470     | Arsenic Tr   | 18.42 | 36  |
| SHMT2    | 6472   | Leukemia, MESH:D015470     | Dexameth     | 18.42 | 12  |
| TNS1     | 7145   | Leukemia, MESH:D015470     | Dexameth     | 18.42 | 15  |
| ATP6V0C  | 527    | Leukemia, MESH:D015470     | Azacitidine  | 18.41 | 16  |
| EXT1     | 2131   | Leukemia, MESH:D015470     | Doxorubic    | 18.41 | 17  |
| F12      | 2161   | Leukemia, MESH:D015470     | Arsenic Tr   | 18.41 | 24  |
| LAP3     | 51056  | Leukemia, MESH:D015470     | Alitretinoi  | 18.41 | 22  |
| LRBA     | 987    | Leukemia, MESH:D015470     | Cytarabine   | 18.41 | 83  |
| MAPRE1   | 22919  | Leukemia, MESH:D015470     | Arsenic Tr   | 18.41 | 23  |
| MEOX2    | 4223   | Leukemia, MESH:D015470     | Decitabine   | 18.41 | 20  |
| MTDH     | 92140  | Leukemia, MESH:D015470     | Dronabinc    | 18.41 | 9   |
| MYC      | 4609   | Leukemia, MESH:D007948     | 2-(2-amin    | 18.41 | 3   |
| ND6      | 4541   | Leukemia, MESH:D015470     | Deferoxan    | 18.41 | 16  |
| PIP4K2A  | 5305   | Leukemia, MESH:D015470     | Air Polluta  | 18.41 | 13  |
| PUS1     | 80324  | Leukemia, MESH:D015470     | Benzoates    | 18.41 | 10  |
| PXMP2    | 5827   | Leukemia, MESH:D015470     | Arsenic Tr   | 18.41 | 15  |
| ADAMTS1  | 9510   | Leukemia, MESH:D015473     | Arsenic Ar   | 18.4  | 268 |
| ATOH8    | 84913  | Leukemia, MESH:D015470     | Dexameth     | 18.4  | 15  |
| ATP1A1   | 476    | Leukemia, MESH:D015473     | Calcitriol E | 18.4  | 155 |
| DUSP4    | 1846   | Leukemia, MESH:D004915     | Cytarabine   | 18.4  | 2   |
| FAR2     | 55711  | Leukemia, MESH:D015473     | arsenite Ci  | 18.4  | 154 |
| GLRX     | 2745   | Leukemia, MESH:D015473     | Antimony     | 18.4  | 159 |
| GSTO2    | 119391 | Leukemia, MESH:D015470     | Arsenic Tr   | 18.4  | 21  |
| GZMB     | 3002   | Leukemia, MESH:D015473     | Cholesterc   | 18.4  | 154 |
| KCNK5    | 8645   | Leukemia, MESH:D015470     | Calcitriol E | 18.4  | 9   |
| MCMBP    | 79892  | Leukemia, MESH:D015473     | Calcitriol E | 18.4  | 154 |
| MYO1D    | 4642   | Leukemia, MESH:D015470     | Calcitriol E | 18.4  | 9   |
| N4BP2L2  | 10443  | Leukemia, MESH:D015470     | Dexameth     | 18.4  | 17  |
| RAMP1    | 10267  | Leukemia, MESH:D015473     | Arsenic ca   | 18.4  | 19  |
| SASH3    | 54440  | Leukemia, MESH:D015473     | Calcitriol E | 18.4  | 154 |
| SIAH2    | 6478   | Leukemia, MESH:D015473     | Arsenic Bu   | 18.4  | 157 |
| TAOK1    | 57551  | Leukemia, MESH:D015470     | Dexameth     | 18.4  | 9   |
| TLE3     | 7090   | Leukemia, MESH:D015470     | Decitabine   | 18.4  | 21  |
| TPBG     | 7162   | Leukemia, MESH:D015470     | Calcitriol E | 18.4  | 15  |
| UBA5     | 79876  | Leukemia, MESH:D015470     | Arsenic Tr   | 18.4  | 19  |
| AKT2     | 208    | Leukemia, MESH:D015470     | Arsenic Tr   | 18.39 | 25  |
| CACNA1A  | 773    | Leukemia, MESH:D015473     | Arsenic Tr   | 18.39 | 262 |
| MAPK13   | 5603   | Leukemia, MESH:D015473     | Arsenic Tr   | 18.39 | 155 |
| MRPL16   | 54948  | Leukemia, MESH:D015473     | Arsenic ar   | 18.39 | 13  |
| MRPL22   | 29093  | Leukemia, MESH:D015473     | arsenite D   | 18.39 | 9   |
| MRPS12   | 6183   | Leukemia, MESH:D015473     | Arsenic Tr   | 18.39 | 262 |
| PDE2A    | 5138   | Leukemia, MESH:D015473     | Arsenic Tr   | 18.39 | 262 |
| PIK3CG   | 5294   | Leukemia, MESH:D015473     | Arsenic Tr   | 18.39 | 267 |
| RMI1     | 80010  | Leukemia, MESH:D015473     | Calcitriol E | 18.39 | 156 |
| BCAN     | 63827  | Leukemia, MESH:D015473     | arsenite D   | 18.38 | 155 |
| SLC41A3  | 54946  | Leukemia, MESH:D015473     | Arsenic Tr   | 18.38 | 261 |
| C1ORF162 | 128346 | Leukemia, MESH:D015470     | Calcitriol ( | 18.37 | 9   |
| TSC2     | 7249   | Leukemia, MESH:D01marker/m | Arsenic Tr   | 18.36 | 41  |
| CAMK2D   | 817    | Leukemia, MESH:D015470     | Arsenic Tr   | 18.36 | 24  |
| GLUD1    | 2746   | Leukemia, MESH:D015470     | Arsenic Tr   | 18.36 | 15  |
| NRCAM    | 4897   | Leukemia, MESH:D015470     | Decitabine   | 18.36 | 16  |
| RPS27L   | 51065  | Leukemia, MESH:D015470     | Decitabine   | 18.36 | 31  |
| SCAND2P  | 54581  | Leukemia, MESH:D015473     | Arsenic Tr   | 18.36 | 259 |

|          |        |                        |              |       |     |
|----------|--------|------------------------|--------------|-------|-----|
| CRNN     | 49860  | Leukemia, MESH:D015473 | Arsenic[Mi   | 18.35 | 154 |
| MIR23A   | 407010 | Leukemia, MESH:D015470 | Arsenic Tr   | 18.35 | 37  |
| MIR708   | 1E+08  | Leukemia, MESH:D015470 | Air Polluta  | 18.35 | 14  |
| TAGLN    | 6876   | Leukemia, MESH:D007948 | Arsenic Tr   | 18.35 | 4   |
| ABTB1    | 80325  | Leukemia, MESH:D015470 | Calcitriol[C | 18.34 | 13  |
| ANKRD24  | 170961 | Leukemia, MESH:D015470 | Decitabine   | 18.34 | 14  |
| BCL2     | 596    | Leukemia, MESH:D007948 | 2-(2-amin    | 18.34 | 4   |
| CA12     | 771    | Leukemia, MESH:D015473 | Arsenic[Ca   | 18.34 | 20  |
| CAPN15   | 6650   | Leukemia, MESH:D015470 | Bortezomi    | 18.34 | 13  |
| CDC23    | 8697   | Leukemia, MESH:D015470 | Arsenic Tr   | 18.34 | 18  |
| CDIPT    | 10423  | Leukemia, MESH:D015470 | Dexameth     | 18.34 | 7   |
| COQ5     | 84274  | Leukemia, MESH:D015470 | Dexameth     | 18.34 | 12  |
| CPSF1    | 29894  | Leukemia, MESH:D015470 | Dexameth     | 18.34 | 12  |
| DOLK     | 22845  | Leukemia, MESH:D015470 | Benzene[C    | 18.34 | 26  |
| GAL3ST4  | 79690  | Leukemia, MESH:D015470 | Calcitriol[C | 18.34 | 11  |
| HNRNPAC  | 10949  | Leukemia, MESH:D015470 | Doxorubic    | 18.34 | 13  |
| IFT172   | 26160  | Leukemia, MESH:D015470 | Arsenic Tr   | 18.34 | 19  |
| MPHOSP+  | 10199  | Leukemia, MESH:D015470 | Dexameth     | 18.34 | 15  |
| MRPL52   | 122704 | Leukemia, MESH:D015470 | Dexameth     | 18.34 | 8   |
| NIPAL1   | 152519 | Leukemia, MESH:D015470 | Dronabinc    | 18.34 | 8   |
| NPY2R    | 4887   | Leukemia, MESH:D015470 | Ethylnitros  | 18.34 | 10  |
| NUDT3    | 11165  | Leukemia, MESH:D015470 | Dexameth     | 18.34 | 9   |
| OXGR1    | 27199  | Leukemia, MESH:D015470 | (+)-JQ1 c    | 18.34 | 9   |
| PDIA3    | 2923   | Leukemia, MESH:D015470 | Arsenic Tr   | 18.34 | 31  |
| PFN1     | 5216   | Leukemia, MESH:D015473 | arsenite[D   | 18.34 | 156 |
| POLR2J2  | 246721 | Leukemia, MESH:D015470 | Arsenic Tr   | 18.34 | 13  |
| RFXANK   | 8625   | Leukemia, MESH:D015470 | Doxorubic    | 18.34 | 12  |
| RPE65    | 6121   | Leukemia, MESH:D015473 | Arsenic[ca   | 18.34 | 155 |
| RPL3     | 6122   | Leukemia, MESH:D015473 | Arsenic[Ar   | 18.34 | 160 |
| SNAPC5   | 10302  | Leukemia, MESH:D015470 | Arsenic Tr   | 18.34 | 14  |
| SREK1IP1 | 285672 | Leukemia, MESH:D015470 | Calcitriol[C | 18.34 | 8   |
| TCF20    | 6942   | Leukemia, MESH:D015470 | Dexameth     | 18.34 | 9   |
| TTC12    | 54970  | Leukemia, MESH:D015470 | Arsenic Tr   | 18.34 | 18  |
| ZNF792   | 126375 | Leukemia, MESH:D015470 | Decitabine   | 18.34 | 18  |
| AP1G2    | 8906   | Leukemia, MESH:D015470 | Dexameth     | 18.33 | 8   |
| APOL6    | 80830  | Leukemia, MESH:D015470 | Dexameth     | 18.33 | 8   |
| BBS7     | 55212  | Leukemia, MESH:D015470 | Dexameth     | 18.33 | 8   |
| BEND3    | 57673  | Leukemia, MESH:D015470 | Dexameth     | 18.33 | 13  |
| CEP55    | 55165  | Leukemia, MESH:D015473 | Arsenic Tr   | 18.33 | 264 |
| CHST6    | 4166   | Leukemia, MESH:D015470 | Arsenic Tr   | 18.33 | 14  |
| CXCL15   | 20309  | Leukemia, MESH:D015470 | Benzene[C    | 18.33 | 28  |
| DCP1A    | 55802  | Leukemia, MESH:D015470 | Dexameth     | 18.33 | 12  |
| ELMOD3   | 84173  | Leukemia, MESH:D015470 | Dexameth     | 18.33 | 13  |
| EPHA3    | 2042   | Leukemia, MESH:D015470 | Doxorubic    | 18.33 | 15  |
| GPHN     | 10243  | Leukemia, MESH:D015470 | Bortezomi    | 18.33 | 23  |
| GREB1L   | 80000  | Leukemia, MESH:D015470 | Doxorubic    | 18.33 | 15  |
| ICAM1    | 3383   | Leukemia, MESH:D007948 | 2-(2-amin    | 18.33 | 3   |
| LRRC49   | 54839  | Leukemia, MESH:D015470 | Doxorubic    | 18.33 | 13  |
| MACC1    | 346389 | Leukemia, MESH:D015470 | Dexameth     | 18.33 | 8   |
| MIR22    | 407004 | Leukemia, MESH:D015470 | Calcitriol[E | 18.33 | 14  |
| MZT2B    | 80097  | Leukemia, MESH:D015470 | Indometha    | 18.33 | 7   |
| NFYA     | 4800   | Leukemia, MESH:D015470 | Benzene[C    | 18.33 | 25  |
| PACC1    | 55248  | Leukemia, MESH:D015470 | Dexameth     | 18.33 | 15  |
| PLK3     | 1263   | Leukemia, MESH:D004915 | Daunorub     | 18.33 | 2   |
| RNF182   | 221687 | Leukemia, MESH:D015470 | Doxorubic    | 18.33 | 13  |
| ROBO1    | 6091   | Leukemia, MESH:D015473 | Arsenic[Ar   | 18.33 | 263 |
| SLCO4A1  | 28231  | Leukemia, MESH:D015473 | arsenite[D   | 18.33 | 157 |
| SPATA2   | 9825   | Leukemia, MESH:D015470 | Dexameth     | 18.33 | 13  |

|         |        |                        |              |       |     |
|---------|--------|------------------------|--------------|-------|-----|
| TXLNG   | 55787  | Leukemia, MESH:D015470 | Dexameth     | 18.33 | 13  |
| ZNF324  | 25799  | Leukemia, MESH:D015470 | Dexameth     | 18.33 | 6   |
| ZNRF3   | 84133  | Leukemia, MESH:D015470 | Arsenic Tr   | 18.33 | 14  |
| ABI3BP  | 25890  | Leukemia, MESH:D015470 | Calcitriol C | 18.32 | 13  |
| ARSB    | 411    | Leukemia, MESH:D015470 | Doxorubic    | 18.32 | 14  |
| COBLL1  | 22837  | Leukemia, MESH:D015470 | Arsenic Tr   | 18.32 | 85  |
| COX7B   | 1349   | Leukemia, MESH:D015470 | Arsenic Tr   | 18.32 | 20  |
| DLX2    | 1746   | Leukemia, MESH:D015470 | Decitabine   | 18.32 | 15  |
| GRIK2   | 2898   | Leukemia, MESH:D015470 | Benzoates    | 18.32 | 14  |
| KRT16   | 3868   | Leukemia, MESH:D015470 | Calcitriol C | 18.32 | 9   |
| KTN1    | 3895   | Leukemia, MESH:D015470 | Arsenic Tr   | 18.32 | 21  |
| MAN2A1  | 4124   | Leukemia, MESH:D015470 | Dexameth     | 18.32 | 17  |
| MPRIIP  | 23164  | Leukemia, MESH:D015470 | Calcitriol C | 18.32 | 15  |
| MTHFR   | 4524   | Leukemia, MESH:D015473 | Arsenic Ca   | 18.32 | 159 |
| PALMD   | 54873  | Leukemia, MESH:D015470 | Dexameth     | 18.32 | 13  |
| PGM2L1  | 283209 | Leukemia, MESH:D015470 | Dexameth     | 18.32 | 11  |
| SLC12A8 | 84561  | Leukemia, MESH:D015470 | Doxorubic    | 18.32 | 14  |
| SP5     | 389058 | Leukemia, MESH:D015470 | Dexameth     | 18.32 | 9   |
| THOP1   | 7064   | Leukemia, MESH:D015470 | Arsenic Tr   | 18.32 | 14  |
| TMBIM1  | 64114  | Leukemia, MESH:D015470 | Arsenic Tr   | 18.32 | 19  |
| CDKN1B  | 1027   | Leukemia, MESH:D004915 | Daunorub     | 18.31 | 3   |
| ADGRE1  | 2015   | Leukemia, MESH:D015470 | Air Polluta  | 18.3  | 18  |
| CKAP2   | 26586  | Leukemia, MESH:D015470 | Arsenic Tr   | 18.3  | 21  |
| NCAM1   | 4684   | Leukemia, MESH:D015470 | Azacididine  | 18.3  | 16  |
| NRG1    | 3084   | Leukemia, MESH:D007948 | 2-(2-amin    | 18.3  | 3   |
| NUF2    | 83540  | Leukemia, MESH:D015470 | Calcitriol C | 18.3  | 22  |
| UBD     | 10537  | Leukemia, MESH:D015470 | Cyclophos    | 18.3  | 13  |
| CDC25C  | 995    | Leukemia, MESH:D007948 | 2-(2-amin    | 18.29 | 3   |
| CYP2E1  | 1571   | Leukemia, MESH:D007948 | 2-(2-amin    | 18.29 | 3   |
| EYA3    | 2140   | Leukemia, MESH:D015473 | Arsenic De   | 18.29 | 12  |
| FDXR    | 2232   | Leukemia, MESH:D015473 | Arsenic De   | 18.29 | 25  |
| GSTM1   | 2944   | Leukemia, MESH:D004915 | Cytarabine   | 18.29 | 2   |
| RPS6KA4 | 8986   | Leukemia, MESH:D015473 | Arsenic Tr   | 18.29 | 260 |
| STC1    | 6781   | Leukemia, MESH:D004915 | Doxorubic    | 18.29 | 3   |
| TFAM    | 7019   | Leukemia, MESH:D015473 | Arsenic Ca   | 18.29 | 159 |
| ABCB1   | 5243   | Leukemia, MESH:D007948 | Arsenic Tr   | 18.28 | 4   |
| EIF3L   | 51386  | Leukemia, MESH:D015473 | arsenite D   | 18.28 | 157 |
| MAPT    | 4137   | Leukemia, MESH:D015473 | Arsenic Ca   | 18.28 | 163 |
| MTHFD1  | 4522   | Leukemia, MESH:D015473 | Arsenic Tr   | 18.28 | 261 |
| NEDD8   | 4738   | Leukemia, MESH:D015473 | Arsenic Tr   | 18.28 | 262 |
| NFKBIE  | 4794   | Leukemia, MESH:D015473 | Arsenic Ar   | 18.28 | 263 |
| RBPMS   | 11030  | Leukemia, MESH:D015473 | Antimony     | 18.28 | 263 |
| BMPR2   | 659    | Leukemia, MESH:D015473 | Arsenic Ar   | 18.27 | 266 |
| LFNG    | 3955   | Leukemia, MESH:D015473 | Arsenic Tr   | 18.27 | 261 |
| PDLIM7  | 9260   | Leukemia, MESH:D015473 | Arsenic Tr   | 18.27 | 260 |
| RRBP1   | 6238   | Leukemia, MESH:D015473 | Arsenic Tr   | 18.27 | 263 |
| EZR     | 7430   | Leukemia, MESH:D015473 | Arsenic Ar   | 18.25 | 266 |
| AKR1B1  | 231    | Leukemia, MESH:D007948 | Arsenic Tr   | 18.24 | 3   |
| APBB2   | 323    | Leukemia, MESH:D015470 | Arsenic Tr   | 18.24 | 20  |
| APLNR   | 187    | Leukemia, MESH:D015470 | Cytarabine   | 18.24 | 88  |
| APOA2   | 336    | Leukemia, MESH:D015470 | Alitretnoi   | 18.24 | 10  |
| ARHGAP2 | 58504  | Leukemia, MESH:D015470 | Dasatinib    | 18.24 | 9   |
| ARHGEF7 | 8874   | Leukemia, MESH:D015470 | Doxorubic    | 18.24 | 17  |
| ASCL1   | 429    | Leukemia, MESH:D015470 | Dronabinc    | 18.24 | 11  |
| CYC1    | 1537   | Leukemia, MESH:D015470 | Air Polluta  | 18.24 | 21  |
| CYP4A1  | 50549  | Leukemia, MESH:D015470 | Benzene E    | 18.24 | 32  |
| EEA1    | 8411   | Leukemia, MESH:D015470 | Air Polluta  | 18.24 | 13  |
| FRMD6   | 122786 | Leukemia, MESH:D015470 | Doxorubic    | 18.24 | 16  |

|          |          |                        |              |       |     |
|----------|----------|------------------------|--------------|-------|-----|
| MEX3B    | 84206    | Leukemia, MESH:D015470 | Doxorubic    | 18.24 | 16  |
| MIR29A   | 407021   | Leukemia, MESH:D015470 | Arsenic Tr   | 18.24 | 22  |
| PEMT     | 10400    | Leukemia, MESH:D015470 | Doxorubic    | 18.24 | 15  |
| PROX1    | 5629     | Leukemia, MESH:D015470 | Decitabine   | 18.24 | 16  |
| PSRC1    | 84722    | Leukemia, MESH:D015473 | arsenite[Ci  | 18.24 | 18  |
| RIN2     | 54453    | Leukemia, MESH:D015470 | Calcitriol[E | 18.24 | 14  |
| RUVBL2   | 10856    | Leukemia, MESH:D015470 | Air Polluta  | 18.24 | 14  |
| SCARA5   | 286133   | Leukemia, MESH:D015470 | Decitabine   | 18.24 | 21  |
| SDF2L1   | 23753    | Leukemia, MESH:D015470 | Arsenic Tr   | 18.24 | 18  |
| SEMA3E   | 9723     | Leukemia, MESH:D015470 | Doxorubic    | 18.24 | 14  |
| SH2B3    | 10019    | Leukemia, MESH:D015470 | Arsenic Tr   | 18.24 | 19  |
| SLC12A4  | 6560     | Leukemia, MESH:D015470 | Decitabine   | 18.24 | 24  |
| SLC29A1  | 2030     | Leukemia, MESH:D004915 | Cytarabine   | 18.24 | 3   |
| TJP2     | 9414     | Leukemia, MESH:D015470 | Arsenic Tr   | 18.24 | 21  |
| CTNNAL1  | 8727     | Leukemia, MESH:D015473 | Arsenic[Ar   | 18.23 | 267 |
| FOXQ1    | 94234    | Leukemia, MESH:D015473 | Antimony     | 18.23 | 155 |
| GSC      | 145258   | Leukemia, MESH:D015470 | Antifungal   | 18.23 | 13  |
| LEPR     | 3953     | Leukemia, MESH:D015473 | Arsenic[Ch   | 18.23 | 21  |
| MIR146B  | 574447   | Leukemia, MESH:D015470 | Arsenic Tr   | 18.23 | 20  |
| RPL10A   | 4736     | Leukemia, MESH:D015473 | Arsenic Tr   | 18.23 | 262 |
| TRAP1    | 10131    | Leukemia, MESH:D015473 | Arsenic Tr   | 18.23 | 261 |
| TSNAX    | 7257     | Leukemia, MESH:D015470 | Air Polluta  | 18.23 | 6   |
| ANKRD37  | 353322   | Leukemia, MESH:D015473 | Arsenic[ar   | 18.22 | 13  |
| BCL10    | 8915     | Leukemia, MESH:D015473 | Arsenic[Ar   | 18.22 | 158 |
| CDA      | 978      | Leukemia, MESH:D015473 | arsenite[Ci  | 18.22 | 156 |
| CRIP2    | 1397     | Leukemia, MESH:D015473 | arsenite[D   | 18.22 | 10  |
| CXCL5    | 6374     | Leukemia, MESH:D015473 | Arsenic[Ar   | 18.22 | 161 |
| CYP2E1   | 1571     | Leukemia, MESH:D015473 | alpha-Toc    | 18.22 | 265 |
| FABP5    | 2171     | Leukemia, MESH:D015473 | Antimony     | 18.22 | 265 |
| FSCN1    | 6624     | Leukemia, MESH:D015473 | Arsenic Tr   | 18.22 | 261 |
| GPRC5A   | 9052     | Leukemia, MESH:D015473 | Arsenic Tr   | 18.22 | 261 |
| MAP3K5   | 4217     | Leukemia, MESH:D015473 | Calcitriol[E | 18.22 | 161 |
| MCM5     | 4174     | Leukemia, MESH:D015473 | Arsenic[Ar   | 18.22 | 265 |
| MED1     | 5469     | Leukemia, MESH:D015473 | Arsenic[Ar   | 18.22 | 264 |
| MICA     | 1.01E+08 | Leukemia, MESH:D015470 | Arsenic Tr   | 18.22 | 27  |
| MIPOL1   | 145282   | Leukemia, MESH:D015470 | Hydroxyur    | 18.22 | 9   |
| OLFM1    | 10439    | Leukemia, MESH:D015473 | Arsenic[Ge   | 18.22 | 157 |
| PPP1R10  | 5514     | Leukemia, MESH:D015473 | Arsenic[Ge   | 18.22 | 158 |
| SLAMF1   | 6504     | Leukemia, MESH:D015470 | Air Polluta  | 18.22 | 10  |
| ADCK2    | 90956    | Leukemia, MESH:D015470 | Decitabine   | 18.21 | 18  |
| BMERB1   | 89927    | Leukemia, MESH:D015470 | Calcitriol[E | 18.21 | 13  |
| CLEC3B   | 7123     | Leukemia, MESH:D015470 | Calcitriol[E | 18.21 | 12  |
| DDIT3    | 1649     | Leukemia, MESH:D007948 | 2-(2-amin    | 18.21 | 3   |
| DGKE     | 8526     | Leukemia, MESH:D015470 | Bortezomi    | 18.21 | 9   |
| GDF1     | 2657     | Leukemia, MESH:D015470 | Doxorubic    | 18.21 | 14  |
| MAK16    | 84549    | Leukemia, MESH:D015470 | Dexameth     | 18.21 | 8   |
| MAP3K7C  | 56911    | Leukemia, MESH:D015470 | Arsenic Tr   | 18.21 | 19  |
| MCPH1    | 79648    | Leukemia, MESH:D015470 | Doxorubic    | 18.21 | 14  |
| MRI1     | 84245    | Leukemia, MESH:D015470 | Decitabine   | 18.21 | 19  |
| NCAPH2   | 29781    | Leukemia, MESH:D015470 | Dexameth     | 18.21 | 8   |
| PKLR     | 5313     | Leukemia, MESH:D015470 | Alitretnoi   | 18.21 | 16  |
| PPP2R5B  | 5526     | Leukemia, MESH:D015470 | Calcitriol[E | 18.21 | 13  |
| PRELID3B | 51012    | Leukemia, MESH:D015470 | Dexameth     | 18.21 | 23  |
| PRPF18   | 8559     | Leukemia, MESH:D015470 | Arsenic Tr   | 18.21 | 13  |
| RNLS     | 55328    | Leukemia, MESH:D015470 | Arsenic Tr   | 18.21 | 14  |
| TMEM71   | 137835   | Leukemia, MESH:D015470 | Doxorubic    | 18.21 | 15  |
| TRIM9    | 114088   | Leukemia, MESH:D015470 | Doxorubic    | 18.21 | 13  |
| UTP25    | 27042    | Leukemia, MESH:D015470 | Dexameth     | 18.21 | 13  |

|          |          |                        |              |       |     |
|----------|----------|------------------------|--------------|-------|-----|
| ZDBF2    | 57683    | Leukemia, MESH:D015470 | Air Polluta  | 18.21 | 12  |
| ZDHC9    | 51114    | Leukemia, MESH:D015470 | Dexameth     | 18.21 | 9   |
| NIPA1    | 123606   | Leukemia, MESH:D015470 | Doxorubic    | 18.2  | 13  |
| PDE1B    | 5153     | Leukemia, MESH:D015473 | arsenite C   | 18.2  | 156 |
| PLCH1    | 23007    | Leukemia, MESH:D015473 | arsenite C   | 18.2  | 157 |
| ANGPT2   | 285      | Leukemia, MESH:D015473 | Arsenic Tr   | 18.19 | 263 |
| GSPT2    | 23708    | Leukemia, MESH:D015473 | Arsenic Tr   | 18.19 | 262 |
| HUS1     | 3364     | Leukemia, MESH:D015473 | Arsenic Ar   | 18.19 | 161 |
| QKI      | 9444     | Leukemia, MESH:D015473 | Arsenic Ar   | 18.19 | 265 |
| STOML2   | 30968    | Leukemia, MESH:D015473 | Arsenic Tr   | 18.19 | 263 |
| ANKRD1   | 27063    | Leukemia, MESH:D015470 | Daunorub     | 18.18 | 42  |
| B3GAT2   | 135152   | Leukemia, MESH:D015473 | Arsenic De   | 18.18 | 155 |
| HOXA9    | 3205     | Leukemia, MESH:D015473 | Arsenic Tr   | 18.18 | 260 |
| MDH2     | 4191     | Leukemia, MESH:D015473 | Arsenic ar:  | 18.18 | 16  |
| PPP1R12A | 4659     | Leukemia, MESH:D015470 | Doxorubic    | 18.18 | 16  |
| SLC40A1  | 30061    | Leukemia, MESH:D015473 | Arsenic Tr   | 18.18 | 264 |
| TGFBR1   | 7046     | Leukemia, MESH:D015473 | Arsenic ar:  | 18.18 | 161 |
| TIMP1    | 7076     | Leukemia, MESH:D004915 | Cytarabine   | 18.18 | 4   |
| VPS52    | 6293     | Leukemia, MESH:D015473 | Arsenic De   | 18.18 | 156 |
| CDC47    | 83879    | Leukemia, MESH:D015473 | Calcitriol C | 18.17 | 157 |
| HSPA9    | 3313     | Leukemia, MESH:D007948 | Arsenic Tr   | 18.17 | 3   |
| ORC1     | 4998     | Leukemia, MESH:D015473 | Calcitriol C | 18.17 | 156 |
| PIIF     | 10105    | Leukemia, MESH:D015473 | Arsenic Tr   | 18.17 | 261 |
| ATOX1    | 475      | Leukemia, MESH:D015470 | Clioquinol   | 18.16 | 14  |
| CRYL1    | 51084    | Leukemia, MESH:D015473 | Arsenic ar:  | 18.16 | 157 |
| CYB5A    | 1528     | Leukemia, MESH:D015470 | Androgen     | 18.16 | 83  |
| IDE      | 3416     | Leukemia, MESH:D015473 | Arsenic ar:  | 18.16 | 160 |
| MCCC2    | 64087    | Leukemia, MESH:D015470 | Dexameth     | 18.16 | 18  |
| MTHFR    | 4524     | Leukemia, MESH:D015470 | Calcitriol C | 18.16 | 82  |
| NUAK2    | 81788    | Leukemia, MESH:D015470 | Arsenic Tr   | 18.16 | 18  |
| PSMD8    | 5714     | Leukemia, MESH:D015470 | Air Polluta  | 18.16 | 14  |
| RAPH1    | 65059    | Leukemia, MESH:D015470 | Arsenic Tr   | 18.16 | 16  |
| SEC23B   | 10483    | Leukemia, MESH:D015470 | Air Polluta  | 18.16 | 15  |
| SEL1L3   | 23231    | Leukemia, MESH:D015470 | Air Polluta  | 18.16 | 19  |
| STRBP    | 55342    | Leukemia, MESH:D015470 | Arsenic Tr   | 18.16 | 35  |
| TSC22D1  | 8848     | Leukemia, MESH:D015473 | Arsenic Tr   | 18.15 | 158 |
| ZNF552   | 79818    | Leukemia, MESH:D015470 | Arsenic Tr   | 18.14 | 18  |
| ACPP     | 56318    | Leukemia, MESH:D015470 | Air Polluta  | 18.12 | 8   |
| C17ORF8C | 55028    | Leukemia, MESH:D015470 | Air Polluta  | 18.12 | 14  |
| C1R      | 715      | Leukemia, MESH:D015473 | Arsenic Tr   | 18.12 | 262 |
| GADD45A  | 1647     | Leukemia, MESH:D004915 | Cytarabine   | 18.12 | 3   |
| GSTM4    | 2948     | Leukemia, MESH:D015470 | Arsenic Tr   | 18.12 | 39  |
| HMOX2    | 3163     | Leukemia, MESH:D015473 | Arsenic Ar   | 18.12 | 263 |
| PC       | 5091     | Leukemia, MESH:D015470 | Bezafibrat   | 18.12 | 18  |
| SPART    | 23111    | Leukemia, MESH:D015470 | Doxorubic    | 18.12 | 15  |
| TIA1     | 7072     | Leukemia, MESH:D015473 | arsenite D   | 18.12 | 157 |
| TRAF2    | 7186     | Leukemia, MESH:D015473 | Arsenic Ar   | 18.12 | 264 |
| ABHD2    | 11057    | Leukemia, MESH:D015473 | arsenite D   | 18.11 | 155 |
| CSRNP2   | 81566    | Leukemia, MESH:D015473 | Calcitriol M | 18.11 | 157 |
| DES      | 1674     | Leukemia, MESH:D004915 | Daunorub     | 18.11 | 3   |
| DNM3OS   | 1.01E+08 | Leukemia, MESH:D015473 | Arsenic Tr   | 18.11 | 261 |
| DUSP8    | 1850     | Leukemia, MESH:D015473 | Arsenic Ar   | 18.11 | 161 |
| EGFLAM   | 133584   | Leukemia, MESH:D015473 | Arsenic ar:  | 18.11 | 158 |
| ELOVL2   | 54898    | Leukemia, MESH:D015473 | Arsenic Tr   | 18.11 | 156 |
| IL16     | 3603     | Leukemia, MESH:D015473 | Arsenic Ca   | 18.11 | 156 |
| IRS2     | 8660     | Leukemia, MESH:D015473 | Arsenic De   | 18.11 | 158 |
| OPTN     | 10133    | Leukemia, MESH:D015473 | Arsenic Ar   | 18.11 | 265 |
| SLC66A1L | 152078   | Leukemia, MESH:D015470 | Dexameth     | 18.11 | 7   |

|          |        |                        |              |       |     |
|----------|--------|------------------------|--------------|-------|-----|
| STEAP4   | 79689  | Leukemia, MESH:D015473 | Arsenic Ca   | 18.11 | 158 |
| XPA      | 7507   | Leukemia, MESH:D015473 | Arsenic Ar   | 18.11 | 265 |
| C1ORF15C | 54991  | Leukemia, MESH:D015470 | Dexameth     | 18.1  | 11  |
| CYTH3    | 9265   | Leukemia, MESH:D015473 | arsenite D   | 18.1  | 153 |
| DOK5     | 55816  | Leukemia, MESH:D015473 | Arsenic Tr   | 18.1  | 156 |
| ERH      | 2079   | Leukemia, MESH:D015473 | Arsenic Tr   | 18.1  | 156 |
| FNDC10   | 643988 | Leukemia, MESH:D015470 | Doxorubic    | 18.1  | 14  |
| ITK      | 3702   | Leukemia, MESH:D015470 | Air Polluta  | 18.1  | 9   |
| SLITRK5  | 26050  | Leukemia, MESH:D015473 | arsenite C   | 18.1  | 157 |
| SPATA5   | 166378 | Leukemia, MESH:D015473 | arsenite C   | 18.1  | 154 |
| STMN4    | 81551  | Leukemia, MESH:D015470 | Cytarabine   | 18.1  | 83  |
| TMEM200  | 645369 | Leukemia, MESH:D015470 | Dexameth     | 18.1  | 11  |
| TRIM29   | 23650  | Leukemia, MESH:D015473 | Arsenic Ca   | 18.1  | 156 |
| TUSC1    | 286319 | Leukemia, MESH:D015470 | Dexameth     | 18.1  | 7   |
| YIF1A    | 10897  | Leukemia, MESH:D015473 | Arsenic Cy   | 18.1  | 21  |
| ARL2BP   | 23568  | Leukemia, MESH:D015470 | Calcitriol C | 18.09 | 7   |
| CARS2    | 79587  | Leukemia, MESH:D015473 | Arsenic De   | 18.09 | 156 |
| CCDC47   | 57003  | Leukemia, MESH:D015470 | Arsenic Tr   | 18.09 | 14  |
| EDA      | 1896   | Leukemia, MESH:D015470 | Dexameth     | 18.09 | 13  |
| FAR2     | 55711  | Leukemia, MESH:D015470 | Calcitriol C | 18.09 | 8   |
| FBXO8    | 26269  | Leukemia, MESH:D015470 | Dexameth     | 18.09 | 8   |
| FOXK1    | 221937 | Leukemia, MESH:D015473 | Arsenic ar   | 18.09 | 157 |
| HAND1    | 9421   | Leukemia, MESH:D015470 | Cytarabine   | 18.09 | 80  |
| HPS6     | 79803  | Leukemia, MESH:D015470 | Benzene C    | 18.09 | 20  |
| HSP90B1  | 7184   | Leukemia, MESH:D007948 | Arsenic Tr   | 18.09 | 3   |
| LETMD1   | 25875  | Leukemia, MESH:D015470 | Dexameth     | 18.09 | 12  |
| MIR10A   | 406902 | Leukemia, MESH:D015470 | Air Polluta  | 18.09 | 15  |
| MRPL22   | 29093  | Leukemia, MESH:D015470 | Dexameth     | 18.09 | 11  |
| NSMCE4A  | 54780  | Leukemia, MESH:D015470 | Indometha    | 18.09 | 11  |
| PGGHG    | 80162  | Leukemia, MESH:D015470 | Arsenic Tr   | 18.09 | 15  |
| POLR3B   | 55703  | Leukemia, MESH:D015470 | Decitabine   | 18.09 | 16  |
| POU4F1   | 5457   | Leukemia, MESH:D015473 | Arsenic Ar   | 18.09 | 263 |
| PPP1R13B | 23368  | Leukemia, MESH:D015473 | Arsenic Ar   | 18.09 | 265 |
| RRAGA    | 10670  | Leukemia, MESH:D015470 | Cyclophos    | 18.09 | 14  |
| SHE      | 126669 | Leukemia, MESH:D015470 | Calcitriol C | 18.09 | 14  |
| SLC2A14  | 144195 | Leukemia, MESH:D015473 | arsenite C   | 18.09 | 155 |
| SLC49A4  | 84925  | Leukemia, MESH:D015470 | Benzene C    | 18.09 | 27  |
| SNX12    | 29934  | Leukemia, MESH:D015470 | Arsenic Tr   | 18.09 | 18  |
| SP1      | 6667   | Leukemia, MESH:D007948 | Arsenic Tr   | 18.09 | 3   |
| TAF5     | 6877   | Leukemia, MESH:D015470 | Benzene N    | 18.09 | 27  |
| TMEM256  | 254863 | Leukemia, MESH:D015470 | Doxorubic    | 18.09 | 13  |
| UNC119   | 9094   | Leukemia, MESH:D015470 | Methotrex    | 18.09 | 12  |
| UROS     | 7390   | Leukemia, MESH:D015470 | Gasoline P   | 18.09 | 10  |
| ZBTB5    | 9925   | Leukemia, MESH:D015470 | Air Polluta  | 18.09 | 13  |
| ZNF207   | 7756   | Leukemia, MESH:D015470 | Doxorubic    | 18.09 | 16  |
| ADH1A    | 124    | Leukemia, MESH:D015470 | Arsenic Tr   | 18.08 | 13  |
| BMPER    | 168667 | Leukemia, MESH:D015470 | Decitabine   | 18.08 | 17  |
| BTBD7    | 55727  | Leukemia, MESH:D015470 | Dexameth     | 18.08 | 8   |
| CCDC127  | 133957 | Leukemia, MESH:D015470 | Dexameth     | 18.08 | 13  |
| COX6A2   | 1339   | Leukemia, MESH:D015470 | Arsenic Tr   | 18.08 | 30  |
| DDN      | 23109  | Leukemia, MESH:D015470 | Dexameth     | 18.08 | 7   |
| DPEP1    | 1800   | Leukemia, MESH:D015470 | Arsenic Tr   | 18.08 | 20  |
| EIF6     | 3692   | Leukemia, MESH:D015470 | Dexameth     | 18.08 | 10  |
| GNG7     | 2788   | Leukemia, MESH:D015470 | Azacitidine  | 18.08 | 21  |
| HIRA     | 7290   | Leukemia, MESH:D015470 | Dexameth     | 18.08 | 9   |
| INO80D   | 54891  | Leukemia, MESH:D015470 | Doxorubic    | 18.08 | 13  |
| KCNE4    | 23704  | Leukemia, MESH:D015470 | Doxorubic    | 18.08 | 14  |
| KLHDC8A  | 55220  | Leukemia, MESH:D015470 | Arsenic Tr   | 18.08 | 13  |

|         |        |                              |              |       |     |
|---------|--------|------------------------------|--------------|-------|-----|
| KLHDC8B | 200942 | Leukemia, MESH:D015470       | Decitabine   | 18.08 | 18  |
| LEO1    | 123169 | Leukemia, MESH:D015470       | Doxorubic    | 18.08 | 13  |
| MPPED2  | 744    | Leukemia, MESH:D015470       | Arsenic Tr   | 18.08 | 19  |
| MTSS2   | 92154  | Leukemia, MESH:D015470       | Dexameth     | 18.08 | 12  |
| NDUFA2  | 4695   | Leukemia, MESH:D015470       | Dexameth     | 18.08 | 14  |
| PTPRN   | 5798   | Leukemia, MESH:D015470       | Calcitriol E | 18.08 | 14  |
| PTPRZ1  | 5803   | Leukemia, MESH:D015470       | Calcitriol C | 18.08 | 77  |
| RHOB    | 388    | Leukemia, MESH:D015473       | Arsenic Ar   | 18.08 | 265 |
| SLC2A10 | 81031  | Leukemia, MESH:D015470       | Doxorubic    | 18.08 | 13  |
| SNRPB2  | 6629   | Leukemia, MESH:D015470       | Dexameth     | 18.08 | 10  |
| SYT13   | 57586  | Leukemia, MESH:D015470       | Decitabine   | 18.08 | 14  |
| TSN     | 7247   | Leukemia, MESH:D015470       | Dexameth     | 18.08 | 10  |
| UBIAD1  | 29914  | Leukemia, MESH:D015470       | Calcitriol E | 18.08 | 8   |
| UBLCP1  | 134510 | Leukemia, MESH:D015470       | Dexameth     | 18.08 | 12  |
| VASH2   | 79805  | Leukemia, MESH:D015470       | Dexameth     | 18.08 | 7   |
| VWA1    | 64856  | Leukemia, MESH:D015470       | Calcitriol E | 18.08 | 12  |
| WDR90   | 197335 | Leukemia, MESH:D015470       | Dexameth     | 18.08 | 15  |
| ZNF644  | 84146  | Leukemia, MESH:D015470       | Dexameth     | 18.08 | 8   |
| AQP9    | 366    | Leukemia, MESH:D01therapeuti | Arsenic Tr   | 18.07 | 20  |
| IL6     | 3569   | Leukemia, MESH:D004915       | Cytarabine   | 18.07 | 4   |
| ITPR2   | 3709   | Leukemia, MESH:D015473       | Arsenic Ar   | 18.07 | 267 |
| LMAN1   | 3998   | Leukemia, MESH:D015470       | Dexameth     | 18.07 | 14  |
| SACS    | 26278  | Leukemia, MESH:D015470       | Arsenic Tr   | 18.07 | 16  |
| SPSB1   | 80176  | Leukemia, MESH:D015473       | Arsenic ar:  | 18.07 | 157 |
| ADD3    | 120    | Leukemia, MESH:D015473       | arsenite Bi  | 18.06 | 158 |
| BDKRB1  | 623    | Leukemia, MESH:D015473       | arsenite Ci  | 18.06 | 156 |
| ECI1    | 1632   | Leukemia, MESH:D015470       | Arsenic Tr   | 18.06 | 22  |
| ERCC6   | 2074   | Leukemia, MESH:D015473       | Arsenic Ar   | 18.06 | 161 |
| H2AX    | 3014   | Leukemia, MESH:D004915       | Cytarabine   | 18.06 | 2   |
| KL      | 9365   | Leukemia, MESH:D015473       | Arsenic Tr   | 18.06 | 156 |
| NOCT    | 25819  | Leukemia, MESH:D015470       | Air Polluta  | 18.06 | 17  |
| SELL    | 6402   | Leukemia, MESH:D015470       | Decitabine   | 18.06 | 21  |
| TNFSF11 | 8600   | Leukemia, MESH:D007948       | 2-(2-amin    | 18.06 | 3   |
| CASP7   | 840    | Leukemia, MESH:D004915       | Doxorubic    | 18.05 | 3   |
| DHCR24  | 1718   | Leukemia, MESH:D015473       | Calcitriol C | 18.05 | 157 |
| HBEGF   | 1839   | Leukemia, MESH:D007948       | 2-(2-amin    | 18.05 | 2   |
| IFRD1   | 3475   | Leukemia, MESH:D015473       | Antimony     | 18.05 | 163 |
| GPX1    | 2876   | Leukemia, MESH:D004915       | Daunorub     | 18.04 | 3   |
| CHEK2   | 11200  | Leukemia, MESH:D007948       | 2-(2-amin    | 18.03 | 3   |
| PRL     | 5617   | Leukemia, MESH:D015470       | Azacitidine  | 18.03 | 90  |
| SELE    | 6401   | Leukemia, MESH:D015470       | Bezafibrat   | 18.03 | 24  |
| HAMP    | 57817  | Leukemia, MESH:D015473       | caffeic aci  | 18.02 | 10  |
| MSR1    | 4481   | Leukemia, MESH:D015473       | Arsenic Tr   | 18.02 | 159 |
| PGM1    | 5236   | Leukemia, MESH:D015473       | Antimony     | 18.02 | 261 |
| ALOX15  | 246    | Leukemia, MESH:D015470       | Benzene C    | 18.01 | 29  |
| BASP1   | 10409  | Leukemia, MESH:D015473       | Arsenic Tr   | 18.01 | 261 |
| FUS     | 2521   | Leukemia, MESH:D015470       | Calcitriol E | 18.01 | 13  |
| MED14   | 9282   | Leukemia, MESH:D015473       | Arsenic ar:  | 18.01 | 156 |
| NCAPD2  | 9918   | Leukemia, MESH:D015473       | arsenite Ci  | 18.01 | 155 |
| NR5A2   | 2494   | Leukemia, MESH:D015470       | Alitretnoi   | 18.01 | 12  |
| PPM1D   | 8493   | Leukemia, MESH:D015473       | Arsenic Ar   | 18.01 | 262 |
| PSMB10  | 5699   | Leukemia, MESH:D015473       | arsenite Ci  | 18.01 | 157 |
| RPS19   | 6223   | Leukemia, MESH:D015473       | arsenite Ci  | 18.01 | 9   |
| SMC2    | 10592  | Leukemia, MESH:D015473       | Calcitriol E | 18.01 | 155 |
| WNK2    | 65268  | Leukemia, MESH:D015473       | Arsenic Tr   | 18.01 | 155 |
| ARHGAP2 | 9411   | Leukemia, MESH:D015470       | Decitabine   | 18    | 20  |
| ARL5B   | 221079 | Leukemia, MESH:D015470       | Air Polluta  | 18    | 23  |
| CD2     | 914    | Leukemia, MESH:D015473       | Arsenic De   | 18    | 10  |



|         |        |                        |              |       |     |
|---------|--------|------------------------|--------------|-------|-----|
| CYCS    | 54205  | Leukemia, MESH:D004915 | Daunorub     | 18    | 3   |
| EPHA8   | 2046   | Leukemia, MESH:D015473 | Arsenic ars  | 18    | 156 |
| HGD     | 3081   | Leukemia, MESH:D015470 | Azacidine    | 18    | 23  |
| HSPA14  | 51182  | Leukemia, MESH:D015473 | arsenite D   | 18    | 155 |
| KIF18B  | 146909 | Leukemia, MESH:D015470 | Calcitriol C | 18    | 11  |
| KIF7    | 374654 | Leukemia, MESH:D015473 | Arsenic Ca   | 18    | 12  |
| KRT14   | 3861   | Leukemia, MESH:D015473 | Arsenic Tr   | 18    | 262 |
| MYO1B   | 4430   | Leukemia, MESH:D015470 | Arsenic Tr   | 18    | 21  |
| OSBPL10 | 114884 | Leukemia, MESH:D015473 | arsenite C   | 18    | 157 |
| PRMT5   | 10419  | Leukemia, MESH:D015470 | Air Polluta  | 18    | 19  |
| PSME3   | 10197  | Leukemia, MESH:D015470 | Arsenic Tr   | 18    | 17  |
| PSPC1   | 55269  | Leukemia, MESH:D015470 | Arsenic Tr   | 18    | 23  |
| RPL22L1 | 200916 | Leukemia, MESH:D015470 | Dexameth     | 18    | 8   |
| SCP2    | 6342   | Leukemia, MESH:D015470 | Dexameth     | 18    | 15  |
| SH3D21  | 79729  | Leukemia, MESH:D015473 | Arsenic ars  | 18    | 157 |
| STIM1   | 6786   | Leukemia, MESH:D015470 | Arsenic Tr   | 18    | 20  |
| TFAP4   | 7023   | Leukemia, MESH:D015473 | Calcitriol C | 18    | 156 |
| BOLA3   | 388962 | Leukemia, MESH:D015473 | arsenite D   | 17.99 | 155 |
| FOXO3   | 2309   | Leukemia, MESH:D007948 | 2-(2-amin    | 17.99 | 3   |
| IL12A   | 3592   | Leukemia, MESH:D007948 | 2-(2-amin    | 17.99 | 2   |
| MSI2    | 124540 | Leukemia, MESH:D015470 | Doxorubic    | 17.99 | 16  |
| NFE2L2  | 4780   | Leukemia, MESH:D004915 | butenolide   | 17.99 | 5   |
| NTN1    | 9423   | Leukemia, MESH:D015470 | Dexameth     | 17.99 | 14  |
| WDR19   | 57728  | Leukemia, MESH:D015473 | Arsenic Ar   | 17.99 | 263 |
| BARD1   | 580    | Leukemia, MESH:D015473 | Calcitriol C | 17.98 | 159 |
| CIP2A   | 57650  | Leukemia, MESH:D015470 | Calcitriol C | 17.98 | 9   |
| H1F8    | 171506 | Leukemia, MESH:D015470 | Decitabine   | 17.98 | 16  |
| SPIB    | 6689   | Leukemia, MESH:D015470 | Arsenic Tr   | 17.98 | 14  |
| ALDH3B2 | 222    | Leukemia, MESH:D015470 | Benzene C    | 17.97 | 23  |
| CHKB    | 1120   | Leukemia, MESH:D015470 | Benzene C    | 17.97 | 23  |
| COL18A1 | 80781  | Leukemia, MESH:D004915 | Cytarabine   | 17.97 | 3   |
| CYP27B1 | 1594   | Leukemia, MESH:D015473 | Arsenic Ca   | 17.97 | 11  |
| DDX27   | 55661  | Leukemia, MESH:D015470 | Doxorubic    | 17.97 | 16  |
| EIF3L   | 51386  | Leukemia, MESH:D015470 | Benzene C    | 17.97 | 24  |
| FBXO33  | 254170 | Leukemia, MESH:D015470 | Dronabinc    | 17.97 | 10  |
| FMO2    | 2327   | Leukemia, MESH:D015473 | Arsenic ca   | 17.97 | 11  |
| GET1    | 7485   | Leukemia, MESH:D015470 | Air Polluta  | 17.97 | 19  |
| KLK10   | 5655   | Leukemia, MESH:D015470 | Alitretnoin  | 17.97 | 8   |
| KRT6B   | 3854   | Leukemia, MESH:D015470 | Calcitriol C | 17.97 | 8   |
| MDGA1   | 266727 | Leukemia, MESH:D015470 | Dasatinib I  | 17.97 | 12  |
| MRPL34  | 64981  | Leukemia, MESH:D015470 | Dexameth     | 17.97 | 9   |
| NCEH1   | 57552  | Leukemia, MESH:D015473 | Arsenic Tr   | 17.97 | 261 |
| NSUN5   | 55695  | Leukemia, MESH:D015470 | Dexameth     | 17.97 | 14  |
| PI4K2A  | 55361  | Leukemia, MESH:D015470 | Arsenic Tr   | 17.97 | 27  |
| PYGO2   | 90780  | Leukemia, MESH:D015470 | Decitabine   | 17.97 | 15  |
| RPAIN   | 84268  | Leukemia, MESH:D015470 | (+)-JQ1 c    | 17.97 | 11  |
| SNAPC3  | 6619   | Leukemia, MESH:D015470 | Air Polluta  | 17.97 | 15  |
| ACER3   | 55331  | Leukemia, MESH:D015470 | Doxorubic    | 17.96 | 13  |
| ARHGAP3 | 257106 | Leukemia, MESH:D015470 | Calcitriol C | 17.96 | 8   |
| CALHM2  | 51063  | Leukemia, MESH:D015470 | Air Polluta  | 17.96 | 13  |
| CEBPG   | 1054   | Leukemia, MESH:D015473 | Arsenic ars  | 17.96 | 163 |
| CEP135  | 9662   | Leukemia, MESH:D015470 | Dexameth     | 17.96 | 11  |
| CRTAC1  | 55118  | Leukemia, MESH:D015470 | Doxorubic    | 17.96 | 13  |
| DZIP3   | 9666   | Leukemia, MESH:D015470 | Dexameth     | 17.96 | 8   |
| FYTTD1  | 84248  | Leukemia, MESH:D015470 | Dexameth     | 17.96 | 9   |
| FZD2    | 2535   | Leukemia, MESH:D015473 | Dexameth     | 17.96 | 157 |
| HMBX1   | 79618  | Leukemia, MESH:D015470 | Dexameth     | 17.96 | 12  |
| KAT7    | 11143  | Leukemia, MESH:D015470 | Doxorubic    | 17.96 | 14  |

|           |        |                        |              |       |     |
|-----------|--------|------------------------|--------------|-------|-----|
| NEK1      | 4750   | Leukemia, MESH:D015470 | Arsenic Tr   | 17.96 | 18  |
| NINL      | 22981  | Leukemia, MESH:D015470 | Dexameth     | 17.96 | 11  |
| PLAGL1    | 5325   | Leukemia, MESH:D015473 | Arsenic De   | 17.96 | 157 |
| PLAUR     | 5329   | Leukemia, MESH:D007948 | 2-(2-amin    | 17.96 | 3   |
| PLEKHA4   | 57664  | Leukemia, MESH:D015470 | Doxorubic    | 17.96 | 13  |
| POFUT2    | 23275  | Leukemia, MESH:D015470 | Dexameth     | 17.96 | 13  |
| RBFOX1    | 54715  | Leukemia, MESH:D015470 | Dexameth     | 17.96 | 13  |
| RBM43     | 375287 | Leukemia, MESH:D015470 | Doxorubic    | 17.96 | 13  |
| RPL7L1    | 285855 | Leukemia, MESH:D015470 | Gasoline I   | 17.96 | 8   |
| SMYD5     | 10322  | Leukemia, MESH:D015470 | Dexameth     | 17.96 | 7   |
| SPTBN4    | 57731  | Leukemia, MESH:D015470 | Arsenic Tr   | 17.96 | 14  |
| TTLL5     | 23093  | Leukemia, MESH:D015470 | Dexameth     | 17.96 | 13  |
| XRCC1     | 7515   | Leukemia, MESH:D004915 | Cytarabine   | 17.96 | 2   |
| ZNHIT6    | 54680  | Leukemia, MESH:D015470 | Dexameth     | 17.96 | 13  |
| DRL       | 30167  | Leukemia, MESH:D015470 | Pentachlo    | 17.95 | 6   |
| HPSE      | 10855  | Leukemia, MESH:D015473 | Arsenic De   | 17.95 | 156 |
| HSPA7     | 3311   | Leukemia, MESH:D015470 | Bortezomi    | 17.95 | 7   |
| LINC0065: | 29075  | Leukemia, MESH:D015470 | Arsenic Tr   | 17.95 | 11  |
| MAP3K6    | 9064   | Leukemia, MESH:D015473 | Arsenic De   | 17.95 | 156 |
| NTS       | 4922   | Leukemia, MESH:D015470 | Arsenic Tr   | 17.95 | 20  |
| PDYN      | 5173   | Leukemia, MESH:D015470 | Decitabine   | 17.95 | 22  |
| SDHB      | 6390   | Leukemia, MESH:D015473 | Arsenic Ar   | 17.95 | 264 |
| SYNE1     | 23345  | Leukemia, MESH:D015473 | Arsenic ar:  | 17.95 | 160 |
| DHRS4L2   | 317749 | Leukemia, MESH:D015470 | Dexameth     | 17.94 | 7   |
| EPHX5     | 322331 | Leukemia, MESH:D015470 | Dexameth     | 17.94 | 5   |
| MGLL      | 11343  | Leukemia, MESH:D015473 | arsenite Ci  | 17.94 | 158 |
| NFIL3     | 4783   | Leukemia, MESH:D015473 | Arsenic ar:  | 17.94 | 158 |
| PER2      | 8864   | Leukemia, MESH:D015473 | Arsenic Ar   | 17.94 | 262 |
| THRSP     | 7069   | Leukemia, MESH:D015473 | Arsenic Bu   | 17.94 | 13  |
| FASL      | 14103  | Leukemia, MESH:D015473 | Arsenic Tr   | 17.93 | 155 |
| PDX1      | 3651   | Leukemia, MESH:D015470 | Alitretinoi  | 17.93 | 27  |
| C3AR1     | 719    | Leukemia, MESH:D015470 | Azacididine  | 17.92 | 78  |
| CLTB      | 1212   | Leukemia, MESH:D015470 | Arsenic Tr   | 17.92 | 21  |
| CORO2A    | 7464   | Leukemia, MESH:D015470 | Arsenic Tr   | 17.92 | 16  |
| DLL3      | 10683  | Leukemia, MESH:D015473 | Arsenic Ge   | 17.92 | 155 |
| FLRT2     | 23768  | Leukemia, MESH:D015470 | Cytarabine   | 17.92 | 78  |
| GOLGA8A   | 23015  | Leukemia, MESH:D015473 | Dexameth     | 17.92 | 157 |
| HLA-DRB:  | 3126   | Leukemia, MESH:D015470 | Doxorubic    | 17.92 | 14  |
| HMGN2     | 3151   | Leukemia, MESH:D015470 | Arsenic Tr   | 17.92 | 28  |
| HYLS1     | 219844 | Leukemia, MESH:D015473 | arsenite D   | 17.92 | 156 |
| KCTD15    | 79047  | Leukemia, MESH:D015470 | Doxorubic    | 17.92 | 14  |
| MPP1      | 4354   | Leukemia, MESH:D015470 | Doxorubic    | 17.92 | 16  |
| MXD4      | 10608  | Leukemia, MESH:D015470 | Dexameth     | 17.92 | 9   |
| NXF1      | 10482  | Leukemia, MESH:D015470 | Dexameth     | 17.92 | 9   |
| PATJ      | 10207  | Leukemia, MESH:D015470 | Benzene C    | 17.92 | 23  |
| PAX3      | 5077   | Leukemia, MESH:D015470 | Dexameth     | 17.92 | 11  |
| PPP1R9A   | 55607  | Leukemia, MESH:D015470 | Arsenic Tr   | 17.92 | 20  |
| PSMD11    | 5717   | Leukemia, MESH:D015470 | Arsenic Tr   | 17.92 | 28  |
| SGMS2     | 166929 | Leukemia, MESH:D015470 | Dexameth     | 17.92 | 9   |
| TET1      | 80312  | Leukemia, MESH:D015470 | Arsenic Tr   | 17.92 | 21  |
| TMC4      | 147798 | Leukemia, MESH:D015473 | Calcitriol C | 17.92 | 7   |
| ZNF702P   | 79986  | Leukemia, MESH:D015470 | Cytarabine   | 17.92 | 82  |
| AP3S1     | 1176   | Leukemia, MESH:D015473 | Arsenic Tr   | 17.91 | 260 |
| AZU1      | 566    | Leukemia, MESH:D015473 | Arsenic Tr   | 17.91 | 264 |
| BCS1L     | 617    | Leukemia, MESH:D015473 | arsenite M   | 17.91 | 156 |
| CCL7      | 6354   | Leukemia, MESH:D015473 | Arsenic Ar   | 17.91 | 264 |
| CKB       | 1152   | Leukemia, MESH:D015473 | Arsenic Tr   | 17.91 | 265 |
| CTNNA1    | 1495   | Leukemia, MESH:D015473 | Arsenic Ar   | 17.91 | 263 |

|          |        |                              |              |       |     |
|----------|--------|------------------------------|--------------|-------|-----|
| EIF3M    | 10480  | Leukemia, MESH:D015473       | Arsenic Tr   | 17.91 | 263 |
| ITGA1    | 3672   | Leukemia, MESH:D015473       | Genistein    | 17.91 | 155 |
| PABPC1L  | 80336  | Leukemia, MESH:D015473       | Arsenic De   | 17.91 | 156 |
| PKP3     | 11187  | Leukemia, MESH:D015473       | Arsenic Tr   | 17.91 | 157 |
| SPATA18  | 132671 | Leukemia, MESH:D015473       | Arsenic De   | 17.91 | 155 |
| TXNL1    | 9352   | Leukemia, MESH:D015473       | arsenite ca  | 17.91 | 11  |
| H3-4     | 8290   | Leukemia, MESH:D015473       | Arsenic Ar   | 17.9  | 263 |
| NDUFB1   | 4707   | Leukemia, MESH:D015473       | arsenite D   | 17.9  | 155 |
| PNPLA3   | 80339  | Leukemia, MESH:D015473       | arsenite D   | 17.9  | 155 |
| SPATC1L  | 84221  | Leukemia, MESH:D015470       | Doxorubic    | 17.9  | 11  |
| TNFRSF6B | 8771   | Leukemia, MESH:D015470       | Arsenic Tr   | 17.9  | 13  |
| WDR5     | 11091  | Leukemia, MESH:D015473       | Arsenic ars  | 17.9  | 159 |
| ZNF608   | 57507  | Leukemia, MESH:D015473       | Arsenic ars  | 17.9  | 157 |
| CDKN1A   | 1026   | Leukemia, MESH:D004915       | Cytarabine   | 17.89 | 3   |
| DCXR     | 51181  | Leukemia, MESH:D015470       | Decitabine   | 17.89 | 22  |
| GATA6    | 2627   | Leukemia, MESH:D015470       | Alitretinoin | 17.89 | 29  |
| NDRG2    | 57447  | Leukemia, MESH:D015470       | Cytarabine   | 17.89 | 82  |
| NOTCH2N  | 388677 | Leukemia, MESH:D015470       | Dexameth     | 17.89 | 11  |
| ZNF263   | 10127  | Leukemia, MESH:D015470       | Dexameth     | 17.89 | 8   |
| AP5B1    | 91056  | Leukemia, MESH:D015470       | Dexameth     | 17.88 | 7   |
| CCNG2    | 901    | Leukemia, MESH:D015473       | Arsenic Tr   | 17.88 | 166 |
| ERFE     | 151176 | Leukemia, MESH:D015470       | Doxorubic    | 17.88 | 12  |
| OGT      | 8473   | Leukemia, MESH:D015473       | arsenic dis  | 17.87 | 266 |
| ZFP36    | 7538   | Leukemia, MESH:D015473       | Arsenic Tr   | 17.87 | 264 |
| CEBPE    | 1053   | Leukemia, MESH:D01therapeuti | Arsenic Tr   | 17.86 | 262 |
| ALAS2    | 212    | Leukemia, MESH:D015473       | Arsenic Tr   | 17.86 | 155 |
| LY75     | 4065   | Leukemia, MESH:D015470       | Cytarabine   | 17.86 | 79  |
| POLA1    | 5422   | Leukemia, MESH:D015473       | arsenite D   | 17.86 | 156 |
| SCN2B    | 6327   | Leukemia, MESH:D015470       | Daunorub     | 17.86 | 44  |
| SERPINB9 | 5272   | Leukemia, MESH:D015473       | Calcitriol C | 17.86 | 156 |
| ABLIM1   | 3983   | Leukemia, MESH:D015473       | Arsenic Tr   | 17.85 | 264 |
| B4GALT7  | 11285  | Leukemia, MESH:D015470       | Cytarabine   | 17.85 | 79  |
| CD300A   | 11314  | Leukemia, MESH:D015470       | Calcitriol ( | 17.85 | 8   |
| COQ9     | 57017  | Leukemia, MESH:D015470       | Dexameth     | 17.85 | 12  |
| FGB      | 2244   | Leukemia, MESH:D015470       | Alitretinoin | 17.85 | 11  |
| FIP1L1   | 81608  | Leukemia, MESH:D015470       | Dasatinib    | 17.85 | 15  |
| GLI3     | 2737   | Leukemia, MESH:D015470       | Androgen     | 17.85 | 15  |
| GPR132   | 29933  | Leukemia, MESH:D015470       | Air Polluta  | 17.85 | 24  |
| GPR87    | 53836  | Leukemia, MESH:D015470       | Arsenic Tr   | 17.85 | 13  |
| IL10     | 3586   | Leukemia, MESH:D007948       | 2-(2-amin    | 17.85 | 3   |
| LMBR1    | 64327  | Leukemia, MESH:D015470       | Dexameth     | 17.85 | 12  |
| LRRC58   | 116064 | Leukemia, MESH:D015470       | Calcitriol C | 17.85 | 14  |
| MTBP     | 27085  | Leukemia, MESH:D015470       | Calcitriol C | 17.85 | 8   |
| MYO19    | 80179  | Leukemia, MESH:D015470       | Calcitriol C | 17.85 | 7   |
| NUDT16   | 131870 | Leukemia, MESH:D015470       | Dexameth     | 17.85 | 17  |
| PIP4K2C  | 79837  | Leukemia, MESH:D015470       | Arsenic Tr   | 17.85 | 16  |
| PLCH1    | 23007  | Leukemia, MESH:D015470       | Calcitriol C | 17.85 | 76  |
| POLR2L   | 5441   | Leukemia, MESH:D015470       | Decitabine   | 17.85 | 19  |
| PRDM8    | 56978  | Leukemia, MESH:D015470       | Arsenic Tr   | 17.85 | 84  |
| PSAP     | 5660   | Leukemia, MESH:D015473       | arsenite Ci  | 17.85 | 155 |
| RBM6     | 10180  | Leukemia, MESH:D015470       | Air Polluta  | 17.85 | 11  |
| RNF38    | 152006 | Leukemia, MESH:D015470       | Doxorubic    | 17.85 | 12  |
| SCLT1    | 132320 | Leukemia, MESH:D015470       | Calcitriol   | 17.85 | 10  |
| SLC26A3  | 1811   | Leukemia, MESH:D015470       | Calcitriol C | 17.85 | 18  |
| SLC34A2  | 10568  | Leukemia, MESH:D015473       | Arsenic Ca   | 17.85 | 156 |
| SUN1     | 23353  | Leukemia, MESH:D015470       | Cyclophos    | 17.85 | 15  |
| USP28    | 57646  | Leukemia, MESH:D015470       | Air Polluta  | 17.85 | 7   |
| PICALM   | 8301   | Leukemia, MESH:D01marker/m   | Dexameth     | 17.84 | 15  |

|         |        |                        |              |       |     |
|---------|--------|------------------------|--------------|-------|-----|
| ACTN4   | 81     | Leukemia, MESH:D015470 | Doxorubic    | 17.84 | 14  |
| AGPAT3  | 56894  | Leukemia, MESH:D015470 | Dexameth     | 17.84 | 17  |
| ATP6    | 4508   | Leukemia, MESH:D015470 | Arsenic Tr   | 17.84 | 20  |
| B3GAT2  | 135152 | Leukemia, MESH:D015470 | Dexameth     | 17.84 | 10  |
| BZW1    | 9689   | Leukemia, MESH:D015470 | Arsenic Tr   | 17.84 | 21  |
| C1RL    | 51279  | Leukemia, MESH:D015470 | Decitabine   | 17.84 | 14  |
| C9ORF72 | 203228 | Leukemia, MESH:D015470 | Calcitriol[C | 17.84 | 14  |
| CCPG1   | 9236   | Leukemia, MESH:D015470 | Arsenic Tr   | 17.84 | 14  |
| CCR5    | 1234   | Leukemia, MESH:D015470 | Benzene[C    | 17.84 | 25  |
| CD53    | 963    | Leukemia, MESH:D015470 | Arsenic Tr   | 17.84 | 31  |
| COL16A1 | 1307   | Leukemia, MESH:D015470 | Arsenic Tr   | 17.84 | 14  |
| DNAJA4  | 55466  | Leukemia, MESH:D015470 | Arsenic Tr   | 17.84 | 27  |
| ENPP3   | 5169   | Leukemia, MESH:D015470 | Dasatinib    | 17.84 | 9   |
| FAM120A | 23196  | Leukemia, MESH:D015470 | Dexameth     | 17.84 | 12  |
| IFT81   | 28981  | Leukemia, MESH:D015470 | Dexameth     | 17.84 | 14  |
| IQCG    | 84223  | Leukemia, MESH:D015470 | Dexameth     | 17.84 | 12  |
| MARCHF5 | 54708  | Leukemia, MESH:D015470 | Dexameth     | 17.84 | 10  |
| MSN     | 4478   | Leukemia, MESH:D015470 | Arsenic Tr   | 17.84 | 23  |
| MTA1    | 9112   | Leukemia, MESH:D015470 | Arsenic Tr   | 17.84 | 16  |
| MYBPH   | 4608   | Leukemia, MESH:D015470 | Arsenic Tr   | 17.84 | 15  |
| OGFOD1  | 55239  | Leukemia, MESH:D015470 | Arsenic Tr   | 17.84 | 20  |
| PALB2   | 79728  | Leukemia, MESH:D015470 | Dexameth     | 17.84 | 21  |
| PARD3   | 56288  | Leukemia, MESH:D015470 | Cyclophos    | 17.84 | 15  |
| POU2F1  | 5451   | Leukemia, MESH:D015470 | Arsenic Tr   | 17.84 | 17  |
| PROCA1  | 147011 | Leukemia, MESH:D015470 | Dexameth     | 17.84 | 8   |
| PRRT2   | 112476 | Leukemia, MESH:D015470 | Dronabinc    | 17.84 | 8   |
| PSD3    | 23362  | Leukemia, MESH:D015470 | Arsenic Tr   | 17.84 | 83  |
| PUM2    | 23369  | Leukemia, MESH:D015470 | Dexameth     | 17.84 | 13  |
| QKI     | 9444   | Leukemia, MESH:D015470 | Arsenic Tr   | 17.84 | 19  |
| RASGRP3 | 25780  | Leukemia, MESH:D015470 | Dexameth     | 17.84 | 17  |
| RCN1    | 5954   | Leukemia, MESH:D015470 | Azacididine  | 17.84 | 15  |
| RPS27A  | 6233   | Leukemia, MESH:D015470 | Arsenic Tr   | 17.84 | 28  |
| SLC17A7 | 57030  | Leukemia, MESH:D015470 | Dexameth     | 17.84 | 9   |
| SMYD4   | 114826 | Leukemia, MESH:D015470 | Dexameth     | 17.84 | 13  |
| SNIP1   | 79753  | Leukemia, MESH:D015470 | Dexameth     | 17.84 | 12  |
| STAP2   | 55620  | Leukemia, MESH:D015470 | Calcitriol[C | 17.84 | 12  |
| SULT1A2 | 6799   | Leukemia, MESH:D015470 | Arsenic Tr   | 17.84 | 19  |
| TIAM1   | 7074   | Leukemia, MESH:D015470 | Benzoates    | 17.84 | 13  |
| UBE2V1  | 7335   | Leukemia, MESH:D015470 | Dexameth     | 17.84 | 9   |
| WWC3    | 55841  | Leukemia, MESH:D015470 | Dexameth     | 17.84 | 13  |
| BNC1    | 646    | Leukemia, MESH:D015473 | arsenite[C]  | 17.83 | 156 |
| ARFGEF3 | 57221  | Leukemia, MESH:D015473 | Arsenic[Ca   | 17.82 | 156 |
| CEP350  | 9857   | Leukemia, MESH:D015473 | Arsenic[ars  | 17.82 | 11  |
| ILDR2   | 387597 | Leukemia, MESH:D015473 | Methotrex    | 17.82 | 155 |
| MYT1    | 4661   | Leukemia, MESH:D015473 | arsenite[D   | 17.82 | 154 |
| NUTF2   | 10204  | Leukemia, MESH:D015473 | Arsenic[De   | 17.82 | 159 |
| TMX4    | 56255  | Leukemia, MESH:D015473 | arsenite[Ri  | 17.82 | 157 |
| TYMS    | 7298   | Leukemia, MESH:D007948 | Arsenic Tr   | 17.82 | 4   |
| ABI2    | 10152  | Leukemia, MESH:D015473 | Arsenic[Ar   | 17.81 | 263 |
| APEX1   | 328    | Leukemia, MESH:D015473 | Arsenic[ars  | 17.81 | 27  |
| NUDT6   | 11162  | Leukemia, MESH:D015473 | Arsenic[De   | 17.81 | 156 |
| PDGFA   | 5154   | Leukemia, MESH:D015473 | Arsenic Tr   | 17.81 | 264 |
| PGAM5   | 192111 | Leukemia, MESH:D015473 | Arsenic Tr   | 17.81 | 260 |
| POU4F2  | 5458   | Leukemia, MESH:D015473 | arsenite[D   | 17.81 | 155 |
| RPS2    | 6187   | Leukemia, MESH:D015473 | arsenite[D   | 17.81 | 158 |
| TRIM2   | 23321  | Leukemia, MESH:D015473 | Calcitriol[C | 17.81 | 155 |
| ZBTB7A  | 51341  | Leukemia, MESH:D015473 | Arsenic[De   | 17.81 | 156 |
| ACTA1   | 58     | Leukemia, MESH:D004915 | Cytarabine   | 17.8  | 2   |

|         |        |                            |              |       |     |
|---------|--------|----------------------------|--------------|-------|-----|
| TLR2    | 7097   | Leukemia, MESH:D007948     | 2-(2-amin    | 17.8  | 3   |
| GABRB2  | 2561   | Leukemia, MESH:D015470     | Dexameth     | 17.78 | 15  |
| ROCK2   | 9475   | Leukemia, MESH:D015470     | Dexameth     | 17.78 | 11  |
| VEGFC   | 7424   | Leukemia, MESH:D004915     | Cytarabine   | 17.78 | 2   |
| CDC25A  | 993    | Leukemia, MESH:D004915     | Daunorub     | 17.77 | 2   |
| HAMP    | 57817  | Leukemia, MESH:D015470     | Deferoxan    | 17.77 | 27  |
| MMP3    | 4314   | Leukemia, MESH:D007948     | 2-(2-amin    | 17.77 | 2   |
| MYCBP2  | 23077  | Leukemia, MESH:D015470     | Arsenic Tr   | 17.77 | 24  |
| PRKAB2  | 5565   | Leukemia, MESH:D015470     | Doxorubic    | 17.77 | 16  |
| SFTPB   | 6439   | Leukemia, MESH:D015470     | Calcitriol C | 17.77 | 14  |
| SYNGR1  | 9145   | Leukemia, MESH:D01marker/m | Arsenic Tr   | 17.76 | 27  |
| ARHGDI  | 396    | Leukemia, MESH:D015473     | Genistein I  | 17.76 | 155 |
| CCNH    | 902    | Leukemia, MESH:D015470     | Arsenic Tr   | 17.76 | 25  |
| CFP     | 5199   | Leukemia, MESH:D015470     | Benzene C    | 17.76 | 26  |
| DUSP3   | 1845   | Leukemia, MESH:D015470     | Decitabine   | 17.76 | 20  |
| HIBADH  | 11112  | Leukemia, MESH:D015470     | Arsenic Tr   | 17.76 | 20  |
| KYAT1   | 883    | Leukemia, MESH:D015470     | Decitabine   | 17.76 | 14  |
| LNPEP   | 4012   | Leukemia, MESH:D015470     | Dronabinc    | 17.76 | 13  |
| MDK     | 4192   | Leukemia, MESH:D015473     | arsenite C   | 17.76 | 160 |
| MYL6    | 4637   | Leukemia, MESH:D015470     | Dexameth     | 17.76 | 14  |
| OSBPL3  | 26031  | Leukemia, MESH:D015470     | Dexameth     | 17.76 | 15  |
| PLA2G6  | 8398   | Leukemia, MESH:D015470     | Arsenic Tr   | 17.76 | 36  |
| PSMB1   | 5689   | Leukemia, MESH:D015473     | Arsenic Tr   | 17.76 | 156 |
| SLC46A3 | 283537 | Leukemia, MESH:D015470     | Dexameth     | 17.76 | 13  |
| SPTBN2  | 6712   | Leukemia, MESH:D015470     | Benzene C    | 17.76 | 24  |
| SRSF1   | 6426   | Leukemia, MESH:D015473     | Antimony     | 17.76 | 156 |
| ANXA6   | 309    | Leukemia, MESH:D015473     | arsenite C   | 17.75 | 158 |
| CACYBP  | 27101  | Leukemia, MESH:D015473     | Arsenic Ar   | 17.75 | 159 |
| CCL22   | 6367   | Leukemia, MESH:D015473     | Arsenic Ar   | 17.75 | 265 |
| DLG1    | 1739   | Leukemia, MESH:D015473     | Arsenic Tr   | 17.75 | 263 |
| ESPL1   | 9700   | Leukemia, MESH:D015473     | arsenite C   | 17.75 | 9   |
| HLA-G   | 3135   | Leukemia, MESH:D015473     | Arsenic Ar   | 17.75 | 265 |
| SLC27A1 | 376497 | Leukemia, MESH:D015473     | arsenite C   | 17.75 | 154 |
| CD79A   | 973    | Leukemia, MESH:D015473     | Genistein I  | 17.74 | 156 |
| CREB3   | 10488  | Leukemia, MESH:D015473     | Calcitriol I | 17.74 | 156 |
| EPX     | 8288   | Leukemia, MESH:D015473     | Arsenic Tr   | 17.74 | 262 |
| KLHL41  | 10324  | Leukemia, MESH:D015470     | Cytarabine   | 17.74 | 78  |
| MMS22L  | 253714 | Leukemia, MESH:D015473     | Calcitriol C | 17.74 | 153 |
| PRPF6   | 24148  | Leukemia, MESH:D015470     | Bortezomi    | 17.74 | 13  |
| TP53I11 | 9537   | Leukemia, MESH:D015473     | Arsenic Ar   | 17.74 | 264 |
| UBXN1   | 51035  | Leukemia, MESH:D015470     | Doxorubic    | 17.74 | 14  |
| ZBTB24  | 9841   | Leukemia, MESH:D015470     | Etoposide    | 17.74 | 18  |
| AAMDC   | 28971  | Leukemia, MESH:D015473     | Arsenic Ar   | 17.73 | 156 |
| ATAD2B  | 54454  | Leukemia, MESH:D015470     | Dexameth     | 17.73 | 13  |
| ATP5PF  | 522    | Leukemia, MESH:D015470     | Doxorubic    | 17.73 | 13  |
| BCAS2   | 10286  | Leukemia, MESH:D015470     | Dexameth     | 17.73 | 10  |
| CD247   | 919    | Leukemia, MESH:D015473     | Arsenic Ca   | 17.73 | 155 |
| CFAP20  | 29105  | Leukemia, MESH:D015470     | Air Polluta  | 17.73 | 13  |
| DCAF13  | 25879  | Leukemia, MESH:D015470     | Bortezomi    | 17.73 | 9   |
| DCLRE1C | 64421  | Leukemia, MESH:D015470     | Arsenic Tr   | 17.73 | 14  |
| EMC9    | 51016  | Leukemia, MESH:D015470     | Dexameth     | 17.73 | 10  |
| ENPP4   | 22875  | Leukemia, MESH:D015470     | Doxorubic    | 17.73 | 13  |
| EXOC8   | 149371 | Leukemia, MESH:D015470     | Dexameth     | 17.73 | 12  |
| EXOSC6  | 118460 | Leukemia, MESH:D015470     | Doxorubic    | 17.73 | 14  |
| FAM78A  | 286336 | Leukemia, MESH:D015470     | Air Polluta  | 17.73 | 8   |
| FBXL7   | 23194  | Leukemia, MESH:D015470     | Arsenic Tr   | 17.73 | 15  |
| GADD45B | 4616   | Leukemia, MESH:D007948     | Arsenic Tr   | 17.73 | 3   |
| GATAD1  | 57798  | Leukemia, MESH:D015470     | Doxorubic    | 17.73 | 13  |

|          |        |                        |              |       |     |
|----------|--------|------------------------|--------------|-------|-----|
| HMGA1    | 3159   | Leukemia, MESH:D015470 | alvocidib /  | 17.73 | 16  |
| KLRG1    | 10219  | Leukemia, MESH:D015470 | Dexameth     | 17.73 | 9   |
| LEPROTL1 | 23484  | Leukemia, MESH:D015470 | Benzene C    | 17.73 | 22  |
| LETM1    | 3954   | Leukemia, MESH:D015470 | Decitabine   | 17.73 | 19  |
| LRRN4    | 164312 | Leukemia, MESH:D015470 | Cytarabine   | 17.73 | 80  |
| MAML1    | 9794   | Leukemia, MESH:D015470 | Arsenic Tr   | 17.73 | 15  |
| METTL3   | 56339  | Leukemia, MESH:D015473 | Arsenic Ar   | 17.73 | 264 |
| NFE2L2A  | 360149 | Leukemia, MESH:D015470 | Arsenic Tr   | 17.73 | 16  |
| NTNG2    | 84628  | Leukemia, MESH:D015470 | Calcitriol C | 17.73 | 8   |
| PIP4P2   | 55529  | Leukemia, MESH:D015470 | Doxorubic    | 17.73 | 14  |
| PLCH2    | 9651   | Leukemia, MESH:D015470 | Dexameth     | 17.73 | 7   |
| PLEKHG1  | 57480  | Leukemia, MESH:D015473 | Arsenic Ar   | 17.73 | 264 |
| PPP1R13B | 23368  | Leukemia, MESH:D015470 | Arsenic Tr   | 17.73 | 18  |
| RELT     | 84957  | Leukemia, MESH:D015470 | Doxorubic    | 17.73 | 16  |
| RSBN1    | 54665  | Leukemia, MESH:D015470 | Doxorubic    | 17.73 | 14  |
| ST6GALN/ | 81849  | Leukemia, MESH:D015470 | Benzene M    | 17.73 | 24  |
| YIF1A    | 10897  | Leukemia, MESH:D015470 | Cytarabine   | 17.73 | 80  |
| YLPM1    | 56252  | Leukemia, MESH:D015470 | Arsenic Tr   | 17.73 | 19  |
| ZBED3    | 84327  | Leukemia, MESH:D015470 | Dexameth     | 17.73 | 7   |
| ZNFX1    | 57169  | Leukemia, MESH:D015470 | Dexameth     | 17.73 | 16  |
| ARSJ     | 79642  | Leukemia, MESH:D015470 | Doxorubic    | 17.72 | 13  |
| ASB9     | 140462 | Leukemia, MESH:D015473 | Arsenic Tr   | 17.72 | 262 |
| ATXN7L1  | 222255 | Leukemia, MESH:D015470 | Dexameth     | 17.72 | 12  |
| BROX     | 148362 | Leukemia, MESH:D015470 | Dexameth     | 17.72 | 13  |
| CCDC3    | 83643  | Leukemia, MESH:D015470 | Dexameth     | 17.72 | 13  |
| CHFR     | 55743  | Leukemia, MESH:D015473 | Arsenic ar:  | 17.72 | 11  |
| CSRN3    | 80034  | Leukemia, MESH:D015470 | Doxorubic    | 17.72 | 13  |
| DDX11    | 1663   | Leukemia, MESH:D015473 | Arsenic Ca   | 17.72 | 156 |
| EIF3F    | 8665   | Leukemia, MESH:D015473 | Arsenic Tr   | 17.72 | 262 |
| ERLIN2   | 11160  | Leukemia, MESH:D015473 | Arsenic De   | 17.72 | 11  |
| GHRL     | 51738  | Leukemia, MESH:D015473 | Arsenic De   | 17.72 | 155 |
| LILRB1   | 10859  | Leukemia, MESH:D015470 | Air Polluta  | 17.72 | 17  |
| MGST3    | 4259   | Leukemia, MESH:D015470 | Dexameth     | 17.72 | 17  |
| MIR200B  | 406984 | Leukemia, MESH:D015473 | Arsenic De   | 17.72 | 158 |
| SNORD10  | 692227 | Leukemia, MESH:D015470 | Gasoline T   | 17.72 | 10  |
| UBE3C    | 9690   | Leukemia, MESH:D015473 | Arsenic ar:  | 17.72 | 11  |
| ZCCHC14  | 23174  | Leukemia, MESH:D015473 | Arsenic ar:  | 17.72 | 157 |
| ZNF232   | 7775   | Leukemia, MESH:D015470 | Dexameth     | 17.72 | 14  |
| CRYBA2   | 1412   | Leukemia, MESH:D015470 | Alitretinoi  | 17.71 | 7   |
| FAT1     | 2195   | Leukemia, MESH:D015473 | Arsenic Tr   | 17.71 | 264 |
| RAB31    | 11031  | Leukemia, MESH:D015473 | Arsenic Ar   | 17.71 | 268 |
| SLC4A1   | 6521   | Leukemia, MESH:D015473 | Cholesterc   | 17.71 | 155 |
| CGREF1   | 10669  | Leukemia, MESH:D015470 | Bortezomi    | 17.7  | 22  |
| ANO8     | 57719  | Leukemia, MESH:D015470 | Cytarabine   | 17.69 | 78  |
| C16ORF87 | 388272 | Leukemia, MESH:D015470 | Irinotecan   | 17.69 | 6   |
| CAMK2G   | 818    | Leukemia, MESH:D015470 | Alitretinoi  | 17.69 | 21  |
| CYP2R1   | 120227 | Leukemia, MESH:D015470 | Dexameth     | 17.69 | 9   |
| DDAH2    | 23564  | Leukemia, MESH:D015470 | Doxorubic    | 17.69 | 15  |
| EI24     | 9538   | Leukemia, MESH:D015470 | Daunorub     | 17.69 | 45  |
| EPD      | 30199  | Leukemia, MESH:D015470 | Dronabinc    | 17.69 | 7   |
| FZD8     | 8325   | Leukemia, MESH:D015470 | Decitabine   | 17.69 | 16  |
| H3F4     | 382523 | Leukemia, MESH:D015470 | Arsenic Tr   | 17.69 | 18  |
| HIVEP2   | 3097   | Leukemia, MESH:D015470 | Benzene C    | 17.69 | 28  |
| LRP4     | 4038   | Leukemia, MESH:D015470 | Arsenic Tr   | 17.69 | 14  |
| METAP2   | 10988  | Leukemia, MESH:D015470 | Doxorubic    | 17.69 | 16  |
| RHOB1    | 9886   | Leukemia, MESH:D015470 | Arsenic Tr   | 17.69 | 16  |
| SCARNA1  | 677769 | Leukemia, MESH:D015470 | Bortezomi    | 17.69 | 7   |
| SF1      | 7536   | Leukemia, MESH:D015470 | Dexameth     | 17.69 | 15  |

|          |        |                            |              |       |     |
|----------|--------|----------------------------|--------------|-------|-----|
| TANK     | 10010  | Leukemia, MESH:D015470     | Arsenic Tr   | 17.69 | 22  |
| TLN2     | 83660  | Leukemia, MESH:D015470     | Cytarabine   | 17.69 | 83  |
| YBX1     | 4904   | Leukemia, MESH:D015470     | Air Polluta  | 17.69 | 16  |
| ZMIZ1    | 57178  | Leukemia, MESH:D015470     | Dexameth     | 17.69 | 9   |
| ITGB2    | 3689   | Leukemia, MESH:D01marker/m | Arsenic Tr   | 17.68 | 266 |
| C12ORF7E | 387882 | Leukemia, MESH:D015470     | (+)-JQ1 c    | 17.68 | 7   |
| DDX60L   | 91351  | Leukemia, MESH:D015470     | Air Polluta  | 17.68 | 12  |
| LRPPRC   | 10128  | Leukemia, MESH:D015470     | Dexameth     | 17.68 | 14  |
| NFIL3    | 4783   | Leukemia, MESH:D015470     | Benzoates    | 17.68 | 26  |
| TIMP2    | 7077   | Leukemia, MESH:D007948     | Arsenic Tr   | 17.68 | 3   |
| ZNF101   | 94039  | Leukemia, MESH:D015470     | Dexameth     | 17.68 | 6   |
| ZNF572   | 137209 | Leukemia, MESH:D015470     | Dexameth     | 17.68 | 6   |
| PTPN11   | 5781   | Leukemia, MESH:D01marker/m | 15-deoxy-    | 17.67 | 21  |
| ADGB     | 79747  | Leukemia, MESH:D015473     | Arsenic M    | 17.67 | 11  |
| DYRK4    | 8798   | Leukemia, MESH:D015470     | Dexameth     | 17.67 | 11  |
| ELN      | 2006   | Leukemia, MESH:D015473     | Calcitriol C | 17.67 | 154 |
| LCAT     | 3931   | Leukemia, MESH:D015470     | Decitabine   | 17.67 | 22  |
| MGP      | 4256   | Leukemia, MESH:D004915     | Cytarabine   | 17.67 | 3   |
| MVK      | 4598   | Leukemia, MESH:D015470     | Dexameth     | 17.67 | 12  |
| PGR      | 5241   | Leukemia, MESH:D015473     | Arsenic ar   | 17.67 | 160 |
| RRAD     | 6236   | Leukemia, MESH:D015470     | Calcitriol C | 17.67 | 26  |
| TDRD3    | 81550  | Leukemia, MESH:D015473     | arsenite Et  | 17.67 | 155 |
| AGRN     | 375790 | Leukemia, MESH:D015473     | Arsenic De   | 17.66 | 160 |
| BAK1     | 578    | Leukemia, MESH:D007948     | Arsenic Tr   | 17.66 | 3   |
| CADM1    | 23705  | Leukemia, MESH:D015473     | Arsenic Ar   | 17.66 | 267 |
| IRS1     | 3667   | Leukemia, MESH:D007948     | Arsenic Tr   | 17.66 | 3   |
| KRR1     | 11103  | Leukemia, MESH:D015473     | Arsenic M    | 17.66 | 15  |
| PLSCR1   | 5359   | Leukemia, MESH:D015473     | Arsenic Tr   | 17.66 | 263 |
| FSTL1    | 11167  | Leukemia, MESH:D015473     | Dexameth     | 17.65 | 155 |
| ITGBL1   | 9358   | Leukemia, MESH:D015473     | Arsenic Tr   | 17.65 | 153 |
| MICAL3   | 57553  | Leukemia, MESH:D015473     | Calcitriol M | 17.65 | 153 |
| MT1F     | 4494   | Leukemia, MESH:D015473     | Arsenic Ar   | 17.65 | 266 |
| NOLC1    | 9221   | Leukemia, MESH:D015473     | Arsenic Tr   | 17.65 | 261 |
| ORC4     | 5000   | Leukemia, MESH:D015473     | Arsenic Ar   | 17.65 | 160 |
| PRDX5    | 25824  | Leukemia, MESH:D015473     | Arsenic Ar   | 17.65 | 265 |
| RAVER2   | 55225  | Leukemia, MESH:D015473     | Dasatinib I  | 17.65 | 153 |
| RCHY1    | 25898  | Leukemia, MESH:D015473     | Arsenic Ar   | 17.65 | 265 |
| WDR72    | 256764 | Leukemia, MESH:D015473     | Arsenic Ca   | 17.65 | 155 |
| ZNF343   | 79175  | Leukemia, MESH:D015473     | Arsenic ar   | 17.65 | 156 |
| ALG14    | 199857 | Leukemia, MESH:D015473     | Arsenic De   | 17.64 | 156 |
| APPBP2   | 10513  | Leukemia, MESH:D015473     | Calcitriol C | 17.64 | 7   |
| CNST     | 163882 | Leukemia, MESH:D015473     | Arsenic ar   | 17.64 | 13  |
| EDNRA    | 1909   | Leukemia, MESH:D015470     | Daunorub     | 17.64 | 42  |
| GTF2A1   | 2957   | Leukemia, MESH:D015473     | Arsenic Ar   | 17.64 | 263 |
| PRRG1    | 5638   | Leukemia, MESH:D015473     | Arsenic Ar   | 17.64 | 158 |
| SAP30    | 8819   | Leukemia, MESH:D015473     | arsenite D   | 17.64 | 158 |
| SGCD     | 6444   | Leukemia, MESH:D015473     | Arsenic Tr   | 17.64 | 261 |
| DCN      | 1634   | Leukemia, MESH:D004915     | Cytarabine   | 17.63 | 3   |
| MSTN     | 2660   | Leukemia, MESH:D015470     | Androgen     | 17.63 | 13  |
| PAX5     | 5079   | Leukemia, MESH:D015473     | Arsenic Tr   | 17.63 | 262 |
| ATP5ME   | 521    | Leukemia, MESH:D015470     | Arsenic Tr   | 17.62 | 41  |
| ATP6V0D2 | 245972 | Leukemia, MESH:D015470     | Deferoxan    | 17.62 | 10  |
| CASP14   | 23581  | Leukemia, MESH:D015470     | Calcitriol C | 17.62 | 13  |
| CHAF1A   | 10036  | Leukemia, MESH:D015470     | Bortezomi    | 17.62 | 22  |
| CLTC     | 1213   | Leukemia, MESH:D015470     | Arsenic Tr   | 17.62 | 41  |
| FTSJ3    | 117246 | Leukemia, MESH:D015470     | Air Polluta  | 17.62 | 10  |
| GTF2H4   | 2968   | Leukemia, MESH:D015470     | Dexameth     | 17.62 | 11  |
| H1-4     | 3008   | Leukemia, MESH:D015470     | Dasatinib I  | 17.62 | 12  |

|          |        |                        |              |       |     |
|----------|--------|------------------------|--------------|-------|-----|
| HSD11B2  | 3291   | Leukemia, MESH:D015473 | Calcitriol C | 17.62 | 8   |
| HYAL2    | 8692   | Leukemia, MESH:D015470 | Benzene C    | 17.62 | 27  |
| IFT20    | 90410  | Leukemia, MESH:D015470 | Dexameth     | 17.62 | 15  |
| KCNQ2    | 3785   | Leukemia, MESH:D015470 | Dronabinc    | 17.62 | 12  |
| MINPP1   | 9562   | Leukemia, MESH:D015470 | Air Polluta  | 17.62 | 13  |
| MRPS31   | 10240  | Leukemia, MESH:D015470 | Air Polluta  | 17.62 | 13  |
| MYL3     | 4634   | Leukemia, MESH:D015470 | Dexameth     | 17.62 | 21  |
| OPN3     | 23596  | Leukemia, MESH:D015470 | Arsenic Tr   | 17.62 | 19  |
| OSBPL7   | 114881 | Leukemia, MESH:D015470 | Alitretinoi  | 17.62 | 13  |
| PLA2G7   | 7941   | Leukemia, MESH:D015470 | Benzene C    | 17.62 | 24  |
| PORCN    | 64840  | Leukemia, MESH:D015470 | Decitabine   | 17.62 | 21  |
| RAB37    | 326624 | Leukemia, MESH:D015470 | Cytarabine   | 17.62 | 76  |
| RAD9A    | 5883   | Leukemia, MESH:D015470 | Arsenic Tr   | 17.62 | 29  |
| TCEAL1   | 9338   | Leukemia, MESH:D015470 | Bortezomi    | 17.62 | 13  |
| USH1C    | 10083  | Leukemia, MESH:D015470 | Dronabinc    | 17.62 | 10  |
| WNK2     | 65268  | Leukemia, MESH:D015470 | Arsenic Tr   | 17.62 | 16  |
| AKT3     | 10000  | Leukemia, MESH:D015470 | Doxorubic    | 17.61 | 15  |
| ATP6V1E1 | 529    | Leukemia, MESH:D015470 | Arsenic Tr   | 17.61 | 18  |
| BAIAP2   | 10458  | Leukemia, MESH:D015470 | Calcitriol C | 17.61 | 9   |
| BOLA3    | 388962 | Leukemia, MESH:D015470 | Dexameth     | 17.61 | 13  |
| CBX4     | 8535   | Leukemia, MESH:D015470 | Arsenic Tr   | 17.61 | 20  |
| CCDC126  | 90693  | Leukemia, MESH:D015470 | Doxorubic    | 17.61 | 13  |
| CORO1C   | 23603  | Leukemia, MESH:D015470 | Dexameth     | 17.61 | 11  |
| CUL5     | 8065   | Leukemia, MESH:D015470 | Arsenic Tr   | 17.61 | 19  |
| DERL2    | 51009  | Leukemia, MESH:D015470 | Dexameth     | 17.61 | 13  |
| DIDO1    | 11083  | Leukemia, MESH:D015470 | Benzene C    | 17.61 | 26  |
| DUSP5    | 1847   | Leukemia, MESH:D015473 | Arsenic Tr   | 17.61 | 263 |
| ERC2     | 26059  | Leukemia, MESH:D015470 | Arsenic Tr   | 17.61 | 16  |
| ERCC6L   | 54821  | Leukemia, MESH:D015470 | Calcitriol C | 17.61 | 14  |
| ETFDH    | 2110   | Leukemia, MESH:D015470 | Dexameth     | 17.61 | 24  |
| FGL1     | 2267   | Leukemia, MESH:D015470 | Arsenic Tr   | 17.61 | 16  |
| INHBB    | 3625   | Leukemia, MESH:D015470 | Arsenic Tr   | 17.61 | 15  |
| KIF13B   | 23303  | Leukemia, MESH:D015470 | Arsenic Tr   | 17.61 | 20  |
| KIF7     | 374654 | Leukemia, MESH:D015470 | Calcitriol C | 17.61 | 9   |
| LAPTM5   | 7805   | Leukemia, MESH:D015470 | Arsenic Tr   | 17.61 | 20  |
| MEPCE    | 56257  | Leukemia, MESH:D015470 | Dexameth     | 17.61 | 12  |
| MIER1    | 57708  | Leukemia, MESH:D015470 | Dexameth     | 17.61 | 8   |
| NDUFS6   | 4726   | Leukemia, MESH:D015470 | Dexameth     | 17.61 | 13  |
| PACSIN3  | 29763  | Leukemia, MESH:D015470 | Doxorubic    | 17.61 | 12  |
| PDXDC1   | 23042  | Leukemia, MESH:D015470 | Arsenic Tr   | 17.61 | 18  |
| POMP     | 51371  | Leukemia, MESH:D015470 | Doxorubic    | 17.61 | 13  |
| QTRT1    | 81890  | Leukemia, MESH:D015470 | Arsenic Tr   | 17.61 | 18  |
| RAB24    | 53917  | Leukemia, MESH:D015470 | Arsenic Tr   | 17.61 | 13  |
| RCSD1    | 92241  | Leukemia, MESH:D015470 | Doxorubic    | 17.61 | 13  |
| SCN2A    | 6326   | Leukemia, MESH:D015470 | Arsenic Tr   | 17.61 | 14  |
| SHC3     | 53358  | Leukemia, MESH:D015470 | Dexameth     | 17.61 | 12  |
| SLC9A8   | 23315  | Leukemia, MESH:D015470 | Doxorubic    | 17.61 | 15  |
| SLCO3A1  | 28232  | Leukemia, MESH:D015470 | Arsenic Tr   | 17.61 | 20  |
| SPECC1   | 92521  | Leukemia, MESH:D015470 | Calcitriol C | 17.61 | 8   |
| UPB1     | 51733  | Leukemia, MESH:D015470 | Dexameth     | 17.61 | 14  |
| WAC      | 51322  | Leukemia, MESH:D015470 | Doxorubic    | 17.61 | 14  |
| ERBB3    | 2065   | Leukemia, MESH:D004915 | Daunorub     | 17.6  | 2   |
| FOXA1    | 3169   | Leukemia, MESH:D015473 | Arsenic Ar   | 17.6  | 266 |
| FOXA2    | 3170   | Leukemia, MESH:D015473 | arsenite D   | 17.6  | 157 |
| NABP1    | 64859  | Leukemia, MESH:D015473 | Arsenic Tr   | 17.6  | 262 |
| CXCR4    | 7852   | Leukemia, MESH:D007948 | Arsenic Tr   | 17.59 | 4   |
| GSK3B    | 2932   | Leukemia, MESH:D004915 | Doxorubic    | 17.59 | 4   |
| ALOX5    | 240    | Leukemia, MESH:D007948 | 2-(2-amin    | 17.58 | 2   |



|          |        |                        |              |       |     |
|----------|--------|------------------------|--------------|-------|-----|
| CBLL1    | 79872  | Leukemia, MESH:D015473 | Arsenic ars  | 17.58 | 10  |
| DNAJB9   | 4189   | Leukemia, MESH:D015473 | Arsenic Tr   | 17.58 | 261 |
| SNCA     | 6622   | Leukemia, MESH:D007948 | Arsenic Tr   | 17.58 | 4   |
| SP110    | 3431   | Leukemia, MESH:D015473 | Arsenic Ar   | 17.58 | 265 |
| VRK2     | 7444   | Leukemia, MESH:D015473 | Cytarabine   | 17.58 | 159 |
| DNMT1    | 1786   | Leukemia, MESH:D007948 | 2-(2-amin    | 17.57 | 3   |
| MIR141   | 406933 | Leukemia, MESH:D015473 | Arsenic Bu   | 17.57 | 11  |
| RXRA     | 6256   | Leukemia, MESH:D007948 | Arsenic Tr   | 17.57 | 3   |
| ADIPOR2  | 79602  | Leukemia, MESH:D015473 | Arsenic De   | 17.56 | 156 |
| CDH2     | 1000   | Leukemia, MESH:D007948 | 2-(2-amin    | 17.56 | 3   |
| EBP      | 10682  | Leukemia, MESH:D015470 | Doxorubic    | 17.56 | 16  |
| PROCR    | 10544  | Leukemia, MESH:D015473 | Arsenic ars  | 17.56 | 155 |
| RASSF1   | 11186  | Leukemia, MESH:D015473 | Arsenic Ar   | 17.56 | 162 |
| TRIM5    | 85363  | Leukemia, MESH:D015473 | arsenite C   | 17.56 | 157 |
| ZBTB20   | 26137  | Leukemia, MESH:D015473 | Arsenic De   | 17.56 | 161 |
| CUL2     | 8453   | Leukemia, MESH:D015473 | Arsenic Ar   | 17.55 | 160 |
| CYGB     | 114757 | Leukemia, MESH:D015473 | Arsenic Tr   | 17.55 | 261 |
| DPYSL3   | 1809   | Leukemia, MESH:D015473 | Arsenic Tr   | 17.55 | 262 |
| ERGIC1   | 57222  | Leukemia, MESH:D015473 | Arsenic ars  | 17.55 | 156 |
| HMGCS2   | 3158   | Leukemia, MESH:D015473 | caffeic aci  | 17.55 | 18  |
| IL21R    | 50615  | Leukemia, MESH:D015473 | Dexameth     | 17.55 | 153 |
| KRT17    | 3872   | Leukemia, MESH:D015473 | arsenite C   | 17.55 | 156 |
| NTM      | 50863  | Leukemia, MESH:D015473 | Arsenic Cy   | 17.55 | 158 |
| PMPCB    | 9512   | Leukemia, MESH:D015473 | Arsenic Tr   | 17.55 | 156 |
| PNP      | 4860   | Leukemia, MESH:D015473 | Arsenic Ar   | 17.55 | 266 |
| AGR2     | 10551  | Leukemia, MESH:D015470 | Arsenic Tr   | 17.54 | 17  |
| AKR1C1   | 1645   | Leukemia, MESH:D015470 | Arsenic Tr   | 17.54 | 19  |
| BAZ1A    | 11177  | Leukemia, MESH:D015470 | Doxorubic    | 17.54 | 16  |
| BRIP1    | 83990  | Leukemia, MESH:D015470 | Calcitriol E | 17.54 | 18  |
| COX11    | 1353   | Leukemia, MESH:D015473 | Arsenic Tr   | 17.54 | 261 |
| DERL1    | 79139  | Leukemia, MESH:D015473 | Arsenic De   | 17.54 | 158 |
| HFE      | 3077   | Leukemia, MESH:D015470 | Arsenic Tr   | 17.54 | 20  |
| HOXB5    | 3215   | Leukemia, MESH:D015473 | Arsenic ars  | 17.54 | 157 |
| LGR5     | 8549   | Leukemia, MESH:D015470 | Arsenic Tr   | 17.54 | 19  |
| OAS2     | 4939   | Leukemia, MESH:D015470 | Air Polluta  | 17.54 | 35  |
| PLIN1    | 5346   | Leukemia, MESH:D015470 | 15-deoxy-    | 17.54 | 10  |
| PLPP5    | 84513  | Leukemia, MESH:D015473 | arsenite D   | 17.54 | 155 |
| PPP1R14B | 26472  | Leukemia, MESH:D015470 | Dexameth     | 17.54 | 12  |
| RHOBTB3  | 22836  | Leukemia, MESH:D015470 | Dexameth     | 17.54 | 15  |
| RIF1     | 55183  | Leukemia, MESH:D015470 | Pentachlo    | 17.54 | 13  |
| TSPAN8   | 7103   | Leukemia, MESH:D015470 | Dexameth     | 17.54 | 11  |
| YBX3     | 8531   | Leukemia, MESH:D015470 | Dexameth     | 17.54 | 18  |
| ZNF106A  | 437005 | Leukemia, MESH:D015473 | Dexameth     | 17.54 | 4   |
| ECHS1    | 1892   | Leukemia, MESH:D015473 | Arsenic Ar   | 17.52 | 162 |
| FLOT1A   | 561345 | Leukemia, MESH:D015473 | Arsenic De   | 17.52 | 8   |
| MUCL1    | 118430 | Leukemia, MESH:D015470 | Cyclophos    | 17.52 | 8   |
| MYH7     | 4625   | Leukemia, MESH:D004915 | Daunorub     | 17.52 | 3   |
| SLC24A5  | 283652 | Leukemia, MESH:D015470 | Doxorubic    | 17.52 | 12  |
| ANXA9    | 8416   | Leukemia, MESH:D015470 | Arsenic Tr   | 17.51 | 17  |
| ATF6B    | 1388   | Leukemia, MESH:D015470 | Arsenic Tr   | 17.51 | 16  |
| CHRD     | 8646   | Leukemia, MESH:D015470 | Decitabine   | 17.51 | 17  |
| FMN2     | 56776  | Leukemia, MESH:D015470 | Arsenic Tr   | 17.51 | 19  |
| FOSL1    | 8061   | Leukemia, MESH:D007948 | 2-(2-amin    | 17.51 | 2   |
| G6PC3    | 92579  | Leukemia, MESH:D015470 | Arsenic Tr   | 17.51 | 15  |
| IL15RA   | 3601   | Leukemia, MESH:D015470 | Cyclophos    | 17.51 | 13  |
| L1TD1    | 54596  | Leukemia, MESH:D015470 | Decitabine   | 17.51 | 16  |
| MT3      | 4504   | Leukemia, MESH:D015470 | Arsenic Tr   | 17.51 | 30  |
| OSBP     | 5007   | Leukemia, MESH:D015470 | Benzene E    | 17.51 | 25  |

|          |        |                            |              |       |     |
|----------|--------|----------------------------|--------------|-------|-----|
| PF4      | 5196   | Leukemia, MESH:D015473     | Arsenic De   | 17.51 | 12  |
| RBM4B    | 83759  | Leukemia, MESH:D015470     | Dexameth     | 17.51 | 10  |
| REPIN1   | 29803  | Leukemia, MESH:D015470     | Arsenic Tr   | 17.51 | 20  |
| RFX8     | 731220 | Leukemia, MESH:D015473     | Calcitriol C | 17.51 | 151 |
| SCRIB    | 23513  | Leukemia, MESH:D015470     | Dexameth     | 17.51 | 8   |
| SNAPC1   | 6617   | Leukemia, MESH:D015470     | Calcitriol C | 17.51 | 13  |
| SRL      | 6345   | Leukemia, MESH:D015470     | Dexameth     | 17.51 | 12  |
| THBS2    | 7058   | Leukemia, MESH:D015473     | arsenite Ci  | 17.51 | 155 |
| TMC4     | 147798 | Leukemia, MESH:D015470     | Calcitriol N | 17.51 | 12  |
| TRIM23   | 373    | Leukemia, MESH:D015470     | Air Polluta  | 17.51 | 18  |
| UQCC2    | 84300  | Leukemia, MESH:D015470     | Air Polluta  | 17.51 | 19  |
| ZFP36L1  | 677    | Leukemia, MESH:D015473     | Arsenic Tr   | 17.51 | 260 |
| CAPZA2   | 830    | Leukemia, MESH:D015470     | Arsenic Tr   | 17.5  | 19  |
| CCNJ     | 54619  | Leukemia, MESH:D015470     | Dexameth     | 17.5  | 8   |
| DENND2C  | 163259 | Leukemia, MESH:D015470     | Dronabinc    | 17.5  | 8   |
| DGLUCY   | 80017  | Leukemia, MESH:D015470     | Doxorubic    | 17.5  | 13  |
| FAM172A  | 83989  | Leukemia, MESH:D015470     | Air Polluta  | 17.5  | 12  |
| GSN      | 2934   | Leukemia, MESH:D004915     | Doxorubic    | 17.5  | 3   |
| HPCA     | 3208   | Leukemia, MESH:D015470     | Arsenic Tr   | 17.5  | 13  |
| ISYNA1   | 51477  | Leukemia, MESH:D015473     | arsenite D   | 17.5  | 157 |
| KIAA1522 | 57648  | Leukemia, MESH:D015473     | Arsenic Ar   | 17.5  | 157 |
| LSM11    | 134353 | Leukemia, MESH:D015470     | Arsenic Tr   | 17.5  | 19  |
| MAGEH1   | 28986  | Leukemia, MESH:D015470     | Dexameth     | 17.5  | 13  |
| MAGT1    | 84061  | Leukemia, MESH:D015470     | Dexameth     | 17.5  | 15  |
| MAK      | 4117   | Leukemia, MESH:D015470     | Arsenic Tr   | 17.5  | 16  |
| NR4A1    | 3164   | Leukemia, MESH:D007948     | 2-(2-amin    | 17.5  | 3   |
| NUP58    | 9818   | Leukemia, MESH:D015470     | Indometha    | 17.5  | 9   |
| PLA2R1   | 22925  | Leukemia, MESH:D015470     | Arsenic Tr   | 17.5  | 25  |
| PPIH     | 10465  | Leukemia, MESH:D015473     | Antimony     | 17.5  | 155 |
| RAB21    | 23011  | Leukemia, MESH:D015470     | Arsenic Tr   | 17.5  | 23  |
| RILPL2   | 196383 | Leukemia, MESH:D015470     | Doxorubic    | 17.5  | 13  |
| RNF170   | 81790  | Leukemia, MESH:D015470     | Dexameth     | 17.5  | 8   |
| SBF2     | 81846  | Leukemia, MESH:D015470     | Doxorubic    | 17.5  | 17  |
| SCEL     | 8796   | Leukemia, MESH:D015470     | Calcitriol C | 17.5  | 8   |
| SEZ6L2   | 26470  | Leukemia, MESH:D015470     | Calcitriol C | 17.5  | 13  |
| SLC18B1  | 116843 | Leukemia, MESH:D015470     | Calcitriol C | 17.5  | 13  |
| SLC7A10  | 56301  | Leukemia, MESH:D015470     | Decitabine   | 17.5  | 14  |
| SYNC     | 81493  | Leukemia, MESH:D015470     | Calcitriol C | 17.5  | 7   |
| TBCEL    | 219899 | Leukemia, MESH:D015470     | Dexameth     | 17.5  | 12  |
| TMEM156  | 80008  | Leukemia, MESH:D015470     | Calcitriol C | 17.5  | 13  |
| ZNF608   | 57507  | Leukemia, MESH:D015470     | Dexameth     | 17.5  | 13  |
| AAR2     | 25980  | Leukemia, MESH:D015470     | Benzene C    | 17.49 | 27  |
| CER1     | 9350   | Leukemia, MESH:D015470     | Dexameth     | 17.49 | 7   |
| DUOX1    | 53905  | Leukemia, MESH:D015473     | Antimony     | 17.49 | 153 |
| EVI5     | 7813   | Leukemia, MESH:D015473     | Arsenic Ca   | 17.49 | 13  |
| GALK2    | 2585   | Leukemia, MESH:D015473     | Arsenic Ar   | 17.49 | 267 |
| PHOX2B   | 8929   | Leukemia, MESH:D015470     | Decitabine   | 17.49 | 14  |
| SMC5     | 23137  | Leukemia, MESH:D015473     | Arsenic Tr   | 17.49 | 264 |
| SSUH2    | 51066  | Leukemia, MESH:D015470     | Cytarabine   | 17.49 | 74  |
| DHCR7    | 1717   | Leukemia, MESH:D01marker/m | Arsenic Ca   | 17.48 | 159 |
| ARHGAP8  | 23779  | Leukemia, MESH:D015473     | Arsenic Ge   | 17.48 | 159 |
| EHBP1L1  | 254102 | Leukemia, MESH:D015473     | Arsenic Ca   | 17.48 | 157 |
| EIF4EBP1 | 1978   | Leukemia, MESH:D007948     | 2-(2-amin    | 17.48 | 3   |
| FRK      | 2444   | Leukemia, MESH:D015473     | Arsenic Tr   | 17.48 | 260 |
| KSR1     | 8844   | Leukemia, MESH:D015473     | arsenite Ci  | 17.48 | 153 |
| NCOA2    | 10499  | Leukemia, MESH:D004915     | Daunorub     | 17.48 | 3   |
| ZNF10    | 7556   | Leukemia, MESH:D015470     | Doxorubic    | 17.48 | 13  |
| ZNF248   | 57209  | Leukemia, MESH:D015470     | Dexameth     | 17.48 | 6   |

|           |        |                        |              |       |     |
|-----------|--------|------------------------|--------------|-------|-----|
| ZNF689    | 115509 | Leukemia, MESH:D015470 | Dexameth     | 17.48 | 11  |
| ALG10     | 84920  | Leukemia, MESH:D015470 | Dexameth     | 17.47 | 7   |
| C6ORF47   | 57827  | Leukemia, MESH:D015470 | Dexameth     | 17.47 | 7   |
| CCDC198   | 55195  | Leukemia, MESH:D015473 | Arsenic Tr   | 17.47 | 261 |
| COLEC12   | 81035  | Leukemia, MESH:D015470 | Calcitriol C | 17.47 | 83  |
| CUX1      | 1523   | Leukemia, MESH:D015470 | (+)-JQ1 c    | 17.47 | 11  |
| FER       | 2241   | Leukemia, MESH:D015473 | Arsenic Ar   | 17.47 | 159 |
| GFRA2     | 2675   | Leukemia, MESH:D015470 | Dexameth     | 17.47 | 11  |
| HIBCH     | 26275  | Leukemia, MESH:D015470 | Calcitriol M | 17.47 | 12  |
| KIAA0232  | 9778   | Leukemia, MESH:D015470 | Dexameth     | 17.47 | 7   |
| MMP14     | 4323   | Leukemia, MESH:D015470 | Arsenic Tr   | 17.47 | 27  |
| OGFR      | 11054  | Leukemia, MESH:D015473 | Genistein I  | 17.47 | 154 |
| PDE1A     | 5136   | Leukemia, MESH:D015470 | Arsenic Tr   | 17.47 | 83  |
| SLC22A23  | 63027  | Leukemia, MESH:D015470 | Calcitriol C | 17.47 | 13  |
| TMEM204   | 79652  | Leukemia, MESH:D015473 | Dexameth     | 17.47 | 153 |
| ZNF157    | 7712   | Leukemia, MESH:D015470 | Decitabine   | 17.47 | 11  |
| ZNF77     | 58492  | Leukemia, MESH:D015470 | Doxorubic    | 17.47 | 12  |
| BCL2L11   | 10018  | Leukemia, MESH:D007948 | Arsenic Tr   | 17.46 | 3   |
| GNA12     | 2768   | Leukemia, MESH:D015470 | Dexameth     | 17.46 | 15  |
| LTBP1     | 4052   | Leukemia, MESH:D015473 | Arsenic Ar   | 17.46 | 158 |
| MMP9      | 4318   | Leukemia, MESH:D007948 | 2-(2-amin    | 17.46 | 3   |
| PMAIP1    | 5366   | Leukemia, MESH:D007948 | 2-(2-amin    | 17.46 | 3   |
| PRSS1     | 5644   | Leukemia, MESH:D015473 | Arsenic Tr   | 17.46 | 261 |
| RBM47     | 54502  | Leukemia, MESH:D015470 | Arsenic Tr   | 17.46 | 28  |
| RNF144B   | 255488 | Leukemia, MESH:D015470 | Doxorubic    | 17.46 | 15  |
| SMARCA4   | 6597   | Leukemia, MESH:D015473 | Arsenic Ar   | 17.46 | 264 |
| ZMYND11   | 10771  | Leukemia, MESH:D015473 | Dexameth     | 17.46 | 153 |
| MIF       | 4282   | Leukemia, MESH:D015473 | Arsenic Ar   | 17.45 | 266 |
| SMAD3     | 4088   | Leukemia, MESH:D007948 | Arsenic Tr   | 17.45 | 3   |
| USP41     | 373856 | Leukemia, MESH:D015470 | Dexameth     | 17.45 | 12  |
| ATM       | 472    | Leukemia, MESH:D007948 | 2-(2-amin    | 17.44 | 3   |
| ZNF584    | 201514 | Leukemia, MESH:D015470 | Doxorubic    | 17.44 | 12  |
| ALPL      | 249    | Leukemia, MESH:D007948 | 2-(2-amin    | 17.43 | 3   |
| DEFA4     | 1669   | Leukemia, MESH:D015470 | Arsenic Tr   | 17.43 | 11  |
| DPY19L1P  | 1E+08  | Leukemia, MESH:D015470 | Dexameth     | 17.43 | 6   |
| ISLR      | 3671   | Leukemia, MESH:D015473 | Dexameth     | 17.43 | 151 |
| THAP7-AS1 | 439931 | Leukemia, MESH:D015470 | Dexameth     | 17.43 | 5   |
| NTRK2     | 4915   | Leukemia, MESH:D015473 | Arsenic Ar   | 17.42 | 267 |
| GFRA1     | 2674   | Leukemia, MESH:D015473 | Arsenic De   | 17.41 | 158 |
| H19       | 283120 | Leukemia, MESH:D015473 | Arsenic Ar   | 17.41 | 160 |
| NUCB2     | 4925   | Leukemia, MESH:D015473 | Arsenic Tr   | 17.41 | 262 |
| TRAF6     | 7189   | Leukemia, MESH:D015473 | Arsenic Ar   | 17.41 | 264 |
| ARHGAP1   | 79658  | Leukemia, MESH:D015470 | Calcitriol C | 17.4  | 13  |
| ARMC9     | 80210  | Leukemia, MESH:D015473 | Arsenic Tr   | 17.4  | 258 |
| BBS4      | 585    | Leukemia, MESH:D015470 | Cyclophos    | 17.4  | 12  |
| CLDND1    | 56650  | Leukemia, MESH:D015470 | Doxorubic    | 17.4  | 11  |
| GOLGA2    | 2801   | Leukemia, MESH:D015470 | Arsenic Tr   | 17.4  | 14  |
| GPER1     | 2852   | Leukemia, MESH:D015470 | Arsenic Tr   | 17.4  | 91  |
| MLF2      | 8079   | Leukemia, MESH:D015470 | Dexameth     | 17.4  | 7   |
| MRPS18C   | 51023  | Leukemia, MESH:D015470 | Gasoline I   | 17.4  | 10  |
| MYNN      | 55892  | Leukemia, MESH:D015470 | Benzene C    | 17.4  | 26  |
| PBDC1     | 51260  | Leukemia, MESH:D015470 | Benzene C    | 17.4  | 22  |
| PELI2     | 57161  | Leukemia, MESH:D015473 | Arsenic Ge   | 17.4  | 155 |
| PPP2CB    | 5516   | Leukemia, MESH:D015470 | Air Polluta  | 17.4  | 25  |
| RNF138    | 51444  | Leukemia, MESH:D015470 | Bortezomi    | 17.4  | 8   |
| SCYL1     | 57410  | Leukemia, MESH:D015470 | Cytarabine   | 17.4  | 79  |
| SNRNP200  | 23020  | Leukemia, MESH:D015473 | Resveratrc   | 17.4  | 159 |
| SYT4      | 6860   | Leukemia, MESH:D015470 | Arsenic Tr   | 17.4  | 13  |

|          |        |                        |              |       |     |
|----------|--------|------------------------|--------------|-------|-----|
| TRIM21   | 6737   | Leukemia, MESH:D015470 | Arsenic Tr   | 17.4  | 19  |
| TRIM33   | 51592  | Leukemia, MESH:D015470 | Gasoline[C   | 17.4  | 9   |
| VPS53    | 55275  | Leukemia, MESH:D015473 | Arsenic Tr   | 17.4  | 157 |
| VTI1A    | 143187 | Leukemia, MESH:D015470 | Dexameth     | 17.4  | 15  |
| WDR47    | 22911  | Leukemia, MESH:D015470 | Azacididine  | 17.4  | 13  |
| ACOT4    | 122970 | Leukemia, MESH:D015470 | Dronabinc    | 17.39 | 12  |
| ATP6V1B2 | 526    | Leukemia, MESH:D015470 | Air Polluta  | 17.39 | 22  |
| B3GNT7   | 93010  | Leukemia, MESH:D015470 | Doxorubic    | 17.39 | 13  |
| BRD1     | 23774  | Leukemia, MESH:D015470 | Dronabinc    | 17.39 | 9   |
| CABYR    | 26256  | Leukemia, MESH:D015470 | Doxorubic    | 17.39 | 15  |
| CPED1    | 79974  | Leukemia, MESH:D015470 | Dexameth     | 17.39 | 13  |
| CPNE1    | 8904   | Leukemia, MESH:D015470 | Arsenic Tr   | 17.39 | 25  |
| DONSON   | 29980  | Leukemia, MESH:D015473 | Calcitriol[C | 17.39 | 9   |
| GARNL3   | 84253  | Leukemia, MESH:D015470 | Arsenic Tr   | 17.39 | 18  |
| GNG4     | 2786   | Leukemia, MESH:D015473 | arsenite[D   | 17.39 | 158 |
| HEATR3   | 55027  | Leukemia, MESH:D015470 | Dexameth     | 17.39 | 8   |
| IL6      | 3569   | Leukemia, MESH:D007948 | 2-(2-amin    | 17.39 | 4   |
| INPP4A   | 3631   | Leukemia, MESH:D015470 | Doxorubic    | 17.39 | 16  |
| ITGA7    | 3679   | Leukemia, MESH:D015470 | Calcitriol[C | 17.39 | 13  |
| KCNIP3   | 30818  | Leukemia, MESH:D015470 | Dronabinc    | 17.39 | 10  |
| KCNK6    | 9424   | Leukemia, MESH:D015470 | Arsenic Tr   | 17.39 | 19  |
| KIRREL3  | 84623  | Leukemia, MESH:D015470 | Dexameth     | 17.39 | 7   |
| KLF12    | 11278  | Leukemia, MESH:D015470 | Doxorubic    | 17.39 | 18  |
| KLHL21   | 9903   | Leukemia, MESH:D015470 | Arsenic Tr   | 17.39 | 18  |
| MATN3    | 4148   | Leukemia, MESH:D015473 | Arsenic[Ca   | 17.39 | 11  |
| NCKAP5   | 344148 | Leukemia, MESH:D015470 | Calcitriol[C | 17.39 | 12  |
| NDUFB11  | 54539  | Leukemia, MESH:D015470 | Dexameth     | 17.39 | 12  |
| NISCH    | 11188  | Leukemia, MESH:D015470 | Dexameth     | 17.39 | 17  |
| NUDT6    | 11162  | Leukemia, MESH:D015470 | Dexameth     | 17.39 | 8   |
| NUTF2    | 10204  | Leukemia, MESH:D015470 | Dexameth     | 17.39 | 13  |
| ORMDL2   | 29095  | Leukemia, MESH:D015470 | Air Polluta  | 17.39 | 14  |
| PDIA5    | 10954  | Leukemia, MESH:D015470 | Doxorubic    | 17.39 | 14  |
| PEAR1    | 375033 | Leukemia, MESH:D015470 | Dexameth     | 17.39 | 13  |
| PFDN5    | 5204   | Leukemia, MESH:D015470 | Calcitriol[C | 17.39 | 12  |
| PIGQ     | 9091   | Leukemia, MESH:D015470 | Dexameth     | 17.39 | 12  |
| PITX1    | 5307   | Leukemia, MESH:D015470 | Cytarabine   | 17.39 | 80  |
| POU2AF1  | 5450   | Leukemia, MESH:D015473 | Calcitriol[C | 17.39 | 154 |
| POU4F2   | 5458   | Leukemia, MESH:D015470 | Dexameth     | 17.39 | 8   |
| PPP1R9B  | 84687  | Leukemia, MESH:D015470 | Dexameth     | 17.39 | 8   |
| PVT1     | 5820   | Leukemia, MESH:D015470 | Benzene[C    | 17.39 | 27  |
| RAB3B    | 5865   | Leukemia, MESH:D015470 | Dexameth     | 17.39 | 14  |
| REEP4    | 80346  | Leukemia, MESH:D015470 | Doxorubic    | 17.39 | 14  |
| RGS11    | 8786   | Leukemia, MESH:D015470 | Arsenic Tr   | 17.39 | 19  |
| RHBDF2   | 79651  | Leukemia, MESH:D015470 | Dexameth     | 17.39 | 14  |
| SLC10A7  | 84068  | Leukemia, MESH:D015470 | Bortezomi    | 17.39 | 14  |
| SMAGP    | 57228  | Leukemia, MESH:D015473 | Arsenic[ar:  | 17.39 | 156 |
| THSD4    | 79875  | Leukemia, MESH:D015473 | Arsenic[Ca   | 17.39 | 156 |
| TMX4     | 56255  | Leukemia, MESH:D015470 | Doxorubic    | 17.39 | 17  |
| UBR1     | 197131 | Leukemia, MESH:D015470 | Dexameth     | 17.39 | 12  |
| VPS37A   | 137492 | Leukemia, MESH:D015470 | Dexameth     | 17.39 | 8   |
| FAM110B  | 90362  | Leukemia, MESH:D015473 | Arsenic Tr   | 17.38 | 261 |
| IGFBP3   | 3486   | Leukemia, MESH:D007948 | Arsenic Tr   | 17.38 | 4   |
| PPP1R16B | 26051  | Leukemia, MESH:D015473 | Arsenic[ar:  | 17.38 | 157 |
| CAMSAP2  | 23271  | Leukemia, MESH:D015473 | Arsenic[ar:  | 17.37 | 157 |
| CCR1     | 1230   | Leukemia, MESH:D015473 | Arsenic[Ar   | 17.37 | 268 |
| CXCL11   | 6373   | Leukemia, MESH:D015473 | Calcitriol[C | 17.37 | 154 |
| FLNB     | 2317   | Leukemia, MESH:D015473 | Arsenic[Ar   | 17.37 | 263 |
| RPL13    | 6137   | Leukemia, MESH:D015473 | arsenite[D   | 17.37 | 156 |

|          |        |                        |              |       |     |
|----------|--------|------------------------|--------------|-------|-----|
| TRH      | 7200   | Leukemia, MESH:D015473 | Dexameth     | 17.37 | 155 |
| CD68     | 968    | Leukemia, MESH:D015470 | Calcitriol C | 17.35 | 21  |
| NFKBIA   | 4792   | Leukemia, MESH:D007948 | 2-(2-amin    | 17.35 | 3   |
| PLOD2    | 5352   | Leukemia, MESH:D015470 | Dexameth     | 17.35 | 17  |
| UBL3     | 5412   | Leukemia, MESH:D015473 | Cytarabine   | 17.35 | 155 |
| GSTA1    | 2938   | Leukemia, MESH:D015470 | Allopurinol  | 17.34 | 29  |
| GSTA4    | 2941   | Leukemia, MESH:D015470 | Decitabine   | 17.34 | 31  |
| HRAS     | 3265   | Leukemia, MESH:D007948 | 2-(2-amin    | 17.34 | 3   |
| NPC1     | 4864   | Leukemia, MESH:D015473 | Arsenic Tr   | 17.34 | 162 |
| CAMKK2   | 10645  | Leukemia, MESH:D015470 | Calcitriol C | 17.33 | 16  |
| IRAG1    | 10335  | Leukemia, MESH:D015473 | Arsenic Ca   | 17.33 | 9   |
| NGF      | 4803   | Leukemia, MESH:D007948 | 2-(2-amin    | 17.33 | 2   |
| UBE2C    | 11065  | Leukemia, MESH:D004915 | Cytarabine   | 17.33 | 2   |
| ADHFE1   | 137872 | Leukemia, MESH:D015470 | Dexameth     | 17.32 | 15  |
| CHGA     | 1113   | Leukemia, MESH:D015470 | Azacitidine  | 17.32 | 12  |
| CLDN3    | 1365   | Leukemia, MESH:D015473 | arsenite Ci  | 17.32 | 156 |
| CPEB4    | 80315  | Leukemia, MESH:D015470 | Dronabinc    | 17.32 | 9   |
| ERO1A    | 30001  | Leukemia, MESH:D015473 | Arsenic Ca   | 17.32 | 159 |
| FRY      | 10129  | Leukemia, MESH:D015470 | Bortezomi    | 17.32 | 18  |
| IFI27L2  | 83982  | Leukemia, MESH:D015470 | Decitabine   | 17.32 | 17  |
| KRT7     | 3855   | Leukemia, MESH:D015473 | Arsenic Tr   | 17.32 | 264 |
| NUCKS1   | 64710  | Leukemia, MESH:D015470 | Bortezomi    | 17.32 | 15  |
| PLSCR4   | 57088  | Leukemia, MESH:D015473 | arsenite D   | 17.32 | 7   |
| PSMB6    | 5694   | Leukemia, MESH:D015470 | Air Polluta  | 17.32 | 20  |
| SLC15A2  | 6565   | Leukemia, MESH:D015470 | Calcitriol C | 17.32 | 9   |
| TGIF2    | 60436  | Leukemia, MESH:D015473 | arsenite Et  | 17.32 | 154 |
| UBA1     | 7317   | Leukemia, MESH:D015470 | Arsenic Tr   | 17.32 | 22  |
| CD27     | 939    | Leukemia, MESH:D015473 | Arsenic Ar   | 17.31 | 157 |
| MAP2K1   | 5604   | Leukemia, MESH:D007948 | 2-(2-amin    | 17.31 | 3   |
| MED13    | 9969   | Leukemia, MESH:D015473 | arsenite Ci  | 17.31 | 155 |
| STRIP1   | 85369  | Leukemia, MESH:D015470 | Doxorubic    | 17.31 | 13  |
| AHR      | 196    | Leukemia, MESH:D007948 | 2-(2-amin    | 17.3  | 3   |
| CCNO     | 10309  | Leukemia, MESH:D015473 | Arsenic Ar   | 17.3  | 263 |
| CENPC    | 1060   | Leukemia, MESH:D015470 | Arsenic Tr   | 17.3  | 18  |
| CYSTM1   | 84418  | Leukemia, MESH:D015473 | arsenite Ci  | 17.3  | 155 |
| GFM1     | 85476  | Leukemia, MESH:D015473 | arsenite D   | 17.3  | 155 |
| H3C1     | 8350   | Leukemia, MESH:D015470 | Benzene C    | 17.3  | 30  |
| HLA-G    | 3135   | Leukemia, MESH:D015470 | Arsenic Tr   | 17.3  | 22  |
| MIR200C  | 406985 | Leukemia, MESH:D015473 | Arsenic Ar   | 17.3  | 159 |
| MYRIP    | 25924  | Leukemia, MESH:D015473 | Arsenic ars  | 17.3  | 11  |
| PNPO     | 55163  | Leukemia, MESH:D015473 | Arsenic Tr   | 17.3  | 154 |
| SLC10A6  | 345274 | Leukemia, MESH:D015473 | Arsenic ars  | 17.3  | 11  |
| TDRD5    | 163589 | Leukemia, MESH:D015470 | Decitabine   | 17.3  | 12  |
| TECRL    | 253017 | Leukemia, MESH:D015470 | Cytarabine   | 17.3  | 78  |
| TICAM2   | 353376 | Leukemia, MESH:D015470 | Arsenic Tr   | 17.3  | 13  |
| VPS35L   | 57020  | Leukemia, MESH:D015470 | Calcitriol C | 17.3  | 6   |
| AKAP7    | 9465   | Leukemia, MESH:D015470 | Decitabine   | 17.29 | 16  |
| CCNDBP1  | 23582  | Leukemia, MESH:D015470 | Air Polluta  | 17.29 | 15  |
| CD247    | 919    | Leukemia, MESH:D015470 | Benzene C    | 17.29 | 24  |
| CD79A    | 973    | Leukemia, MESH:D015470 | Bortezomi    | 17.29 | 11  |
| CDK16    | 5127   | Leukemia, MESH:D015470 | Dronabinc    | 17.29 | 8   |
| CDKN2AIF | 91368  | Leukemia, MESH:D015470 | Dexameth     | 17.29 | 8   |
| CLIP3    | 25999  | Leukemia, MESH:D015470 | Decitabine   | 17.29 | 13  |
| CREB3    | 10488  | Leukemia, MESH:D015470 | Calcitriol C | 17.29 | 15  |
| DIAPH1   | 1729   | Leukemia, MESH:D015473 | Arsenic Tr   | 17.29 | 262 |
| DUSP11   | 8446   | Leukemia, MESH:D015470 | Alitretinoi  | 17.29 | 13  |
| ELP2     | 55250  | Leukemia, MESH:D015470 | Benzene C    | 17.29 | 27  |
| FABP7A   | 58128  | Leukemia, MESH:D015470 | Dexameth     | 17.29 | 7   |

|          |        |                        |              |       |     |
|----------|--------|------------------------|--------------|-------|-----|
| FGD3     | 89846  | Leukemia, MESH:D015470 | Calcitriol[( | 17.29 | 8   |
| GOLGA8B  | 440270 | Leukemia, MESH:D015470 | Doxorubic    | 17.29 | 14  |
| ING2     | 3622   | Leukemia, MESH:D015470 | Dexameth     | 17.29 | 11  |
| ITGB1BP1 | 9270   | Leukemia, MESH:D015470 | Dronabinc    | 17.29 | 9   |
| LMF1     | 64788  | Leukemia, MESH:D015470 | Arsenic Tr   | 17.29 | 19  |
| MFSD6    | 54842  | Leukemia, MESH:D015470 | Calcitriol[E | 17.29 | 16  |
| MRGBP    | 55257  | Leukemia, MESH:D015470 | Doxorubic    | 17.29 | 11  |
| MT1E     | 4493   | Leukemia, MESH:D015473 | Antimony     | 17.29 | 167 |
| NDUFA11  | 126328 | Leukemia, MESH:D015470 | Doxorubic    | 17.29 | 12  |
| NFS1     | 9054   | Leukemia, MESH:D015473 | Dexameth     | 17.29 | 155 |
| NPTXR    | 23467  | Leukemia, MESH:D015470 | (+)-JQ1 c    | 17.29 | 11  |
| PHC1     | 1911   | Leukemia, MESH:D015470 | Air Polluta  | 17.29 | 21  |
| PHF21A   | 51317  | Leukemia, MESH:D015470 | Arsenic Tr   | 17.29 | 20  |
| PLEKHG1  | 57480  | Leukemia, MESH:D015470 | Arsenic Tr   | 17.29 | 16  |
| RSU1     | 6251   | Leukemia, MESH:D015473 | Arsenic Tr   | 17.29 | 262 |
| SAMSN1   | 64092  | Leukemia, MESH:D015470 | Air Polluta  | 17.29 | 11  |
| STAM2    | 10254  | Leukemia, MESH:D015470 | Air Polluta  | 17.29 | 19  |
| TIMM44   | 10469  | Leukemia, MESH:D015473 | Arsenic[De   | 17.29 | 158 |
| UBL4A    | 8266   | Leukemia, MESH:D015470 | Doxorubic    | 17.29 | 12  |
| UCP2     | 7351   | Leukemia, MESH:D007948 | 2-(2-amin    | 17.29 | 3   |
| WDR83OS  | 51398  | Leukemia, MESH:D015470 | Dexameth     | 17.29 | 10  |
| ZCCHC12  | 170261 | Leukemia, MESH:D015470 | Decitabine   | 17.29 | 20  |
| ZNF124   | 7678   | Leukemia, MESH:D015470 | Dexameth     | 17.29 | 7   |
| ZNF469   | 84627  | Leukemia, MESH:D015470 | Calcitriol[E | 17.29 | 12  |
| ABHD15   | 116236 | Leukemia, MESH:D015470 | Doxorubic    | 17.28 | 14  |
| ARPC3    | 10094  | Leukemia, MESH:D015470 | Arsenic Tr   | 17.28 | 19  |
| BCAR3    | 8412   | Leukemia, MESH:D015473 | Arsenic[Cy   | 17.28 | 160 |
| BCAS1    | 8537   | Leukemia, MESH:D015470 | Calcitriol[E | 17.28 | 7   |
| C1QTNF1  | 114897 | Leukemia, MESH:D015470 | Dexameth     | 17.28 | 12  |
| COASY    | 80347  | Leukemia, MESH:D015470 | Arsenic Tr   | 17.28 | 14  |
| DLD      | 1738   | Leukemia, MESH:D015473 | Buthionine   | 17.28 | 156 |
| EIF3F    | 8665   | Leukemia, MESH:D015470 | Arsenic Tr   | 17.28 | 13  |
| ESRP2    | 80004  | Leukemia, MESH:D015470 | (+)-JQ1 c    | 17.28 | 9   |
| F8A1     | 8263   | Leukemia, MESH:D015470 | Dexameth     | 17.28 | 11  |
| FABP7    | 2173   | Leukemia, MESH:D015473 | Arsenic Tr   | 17.28 | 264 |
| FAS      | 355    | Leukemia, MESH:D004915 | Cytarabine   | 17.28 | 2   |
| FIG4     | 9896   | Leukemia, MESH:D015470 | Air Polluta  | 17.28 | 13  |
| HSPB2    | 3316   | Leukemia, MESH:D015470 | Dexameth     | 17.28 | 16  |
| KRT10    | 3858   | Leukemia, MESH:D015473 | Antimony     | 17.28 | 157 |
| MCAM     | 4162   | Leukemia, MESH:D015473 | arsenite[D   | 17.28 | 11  |
| MIR200B  | 406984 | Leukemia, MESH:D015470 | Dexameth     | 17.28 | 14  |
| NFAT5    | 10725  | Leukemia, MESH:D015473 | Dexameth     | 17.28 | 154 |
| PDLIM1   | 9124   | Leukemia, MESH:D015473 | Arsenic[De   | 17.28 | 158 |
| PPARGC1I | 133522 | Leukemia, MESH:D015473 | alpha-Toc    | 17.28 | 156 |
| SGPP2    | 130367 | Leukemia, MESH:D015470 | Dexameth     | 17.28 | 12  |
| ST6GALN/ | 27090  | Leukemia, MESH:D015470 | Arsenic Tr   | 17.28 | 14  |
| TMEM237  | 65062  | Leukemia, MESH:D015470 | Doxorubic    | 17.28 | 15  |
| TOMM40L  | 84134  | Leukemia, MESH:D015470 | Dexameth     | 17.28 | 7   |
| TSR1     | 55720  | Leukemia, MESH:D015470 | Dexameth     | 17.28 | 13  |
| TTC23    | 64927  | Leukemia, MESH:D015470 | Decitabine   | 17.28 | 19  |
| XYLT1    | 64131  | Leukemia, MESH:D015470 | Dexameth     | 17.28 | 13  |
| AGO2     | 27161  | Leukemia, MESH:D015473 | Arsenic[Ar   | 17.27 | 264 |
| CLIC4    | 25932  | Leukemia, MESH:D015473 | Arsenic Tr   | 17.27 | 262 |
| COL3A1   | 1281   | Leukemia, MESH:D007948 | 2-(2-amin    | 17.27 | 3   |
| HAMP     | 57817  | Leukemia, MESH:D004915 | Doxorubic    | 17.27 | 4   |
| LAMA5    | 3911   | Leukemia, MESH:D015473 | Arsenic[ar   | 17.27 | 158 |
| MAPK10   | 5602   | Leukemia, MESH:D015473 | arsenite[D   | 17.27 | 155 |
| PTGR1    | 22949  | Leukemia, MESH:D015470 | Air Polluta  | 17.27 | 22  |

|         |        |                        |               |       |     |
|---------|--------|------------------------|---------------|-------|-----|
| STAT5   | 1E+08  | Leukemia, MESH:D015473 | Arsenic Tr    | 17.27 | 151 |
| TUBB2B  | 347733 | Leukemia, MESH:D015473 | Arsenic De    | 17.27 | 160 |
| HLA-E   | 3133   | Leukemia, MESH:D015473 | Arsenic Tr    | 17.26 | 263 |
| C2      | 717    | Leukemia, MESH:D015470 | Air Polluta   | 17.25 | 21  |
| CLOCK   | 9575   | Leukemia, MESH:D015470 | Bezafibrat    | 17.25 | 16  |
| CXCL16  | 58191  | Leukemia, MESH:D015470 | Arsenic Tr    | 17.25 | 27  |
| DDIT4L  | 115265 | Leukemia, MESH:D015470 | Dronabinc     | 17.25 | 9   |
| F2R     | 2149   | Leukemia, MESH:D004915 | Doxorubic     | 17.25 | 3   |
| GRB14   | 2888   | Leukemia, MESH:D015470 | Dexameth      | 17.25 | 9   |
| HCAR2   | 338442 | Leukemia, MESH:D015470 | Dexameth      | 17.25 | 11  |
| KCNK1   | 3775   | Leukemia, MESH:D015470 | Decitabine    | 17.25 | 17  |
| MDM4    | 4194   | Leukemia, MESH:D015470 | Arsenic Tr    | 17.25 | 41  |
| MID1IP1 | 58526  | Leukemia, MESH:D015470 | Gasoline N    | 17.25 | 13  |
| PANK1   | 53354  | Leukemia, MESH:D015470 | Ifosfamide    | 17.25 | 10  |
| PTMS    | 5763   | Leukemia, MESH:D015470 | Benzene C     | 17.25 | 27  |
| RANGAP1 | 5905   | Leukemia, MESH:D015470 | Benzene C     | 17.25 | 36  |
| RIOK3   | 8780   | Leukemia, MESH:D015470 | Dexameth      | 17.25 | 15  |
| SAA3    | 20210  | Leukemia, MESH:D015470 | Cyclophos     | 17.25 | 13  |
| SOX18   | 54345  | Leukemia, MESH:D015470 | Arsenic Tr    | 17.25 | 35  |
| TBK1    | 29110  | Leukemia, MESH:D015470 | Dexameth      | 17.25 | 12  |
| TBXT    | 6862   | Leukemia, MESH:D015473 | Arsenic ar    | 17.25 | 156 |
| BACE1   | 23621  | Leukemia, MESH:D015470 | Arsenic Tr    | 17.24 | 16  |
| FBXO5   | 26271  | Leukemia, MESH:D015473 | Calcitriol C  | 17.24 | 154 |
| GLUD1   | 2746   | Leukemia, MESH:D015473 | arsenic dis   | 17.24 | 262 |
| TSC2    | 7249   | Leukemia, MESH:D015473 | Arsenic Ar    | 17.24 | 160 |
| CD86    | 942    | Leukemia, MESH:D007948 | 2-(2-amin     | 17.23 | 3   |
| COL4A2  | 1284   | Leukemia, MESH:D015473 | Arsenic Ca    | 17.23 | 156 |
| DUT     | 1854   | Leukemia, MESH:D015473 | arsenite Ci   | 17.23 | 158 |
| ESRP1   | 54845  | Leukemia, MESH:D015473 | Arsenic Tr    | 17.23 | 261 |
| HNRNPH1 | 3187   | Leukemia, MESH:D015473 | Arsenic Tr    | 17.23 | 260 |
| ADGRD1  | 283383 | Leukemia, MESH:D015473 | Arsenic De    | 17.22 | 11  |
| CD44    | 960    | Leukemia, MESH:D007948 | Arsenic Tr    | 17.22 | 4   |
| DNMT3L  | 29947  | Leukemia, MESH:D015473 | Arsenic Ar    | 17.22 | 160 |
| DYNC2I2 | 89891  | Leukemia, MESH:D015473 | Arsenic Ar    | 17.22 | 264 |
| HOXA10  | 3206   | Leukemia, MESH:D015473 | arsenite Ci   | 17.22 | 155 |
| NDUFA10 | 4705   | Leukemia, MESH:D015473 | Arsenic Tr    | 17.22 | 262 |
| NFASC   | 23114  | Leukemia, MESH:D015473 | Arsenic Ca    | 17.22 | 156 |
| PXK     | 54899  | Leukemia, MESH:D015473 | Arsenic Tr    | 17.22 | 155 |
| RGS7    | 6000   | Leukemia, MESH:D015473 | Arsenic Ge    | 17.22 | 155 |
| UBR2    | 23304  | Leukemia, MESH:D015473 | Arsenic ar    | 17.22 | 157 |
| MT1     | 17748  | Leukemia, MESH:D015470 | Dexameth      | 17.21 | 19  |
| PLAGL2  | 5326   | Leukemia, MESH:D015473 | Arsenic Tr    | 17.21 | 262 |
| ZIC1    | 7545   | Leukemia, MESH:D015473 | Arsenic ar    | 17.21 | 157 |
| GATA5   | 140628 | Leukemia, MESH:D015470 | Cytarabine    | 17.2  | 87  |
| INSR    | 3643   | Leukemia, MESH:D015473 | Arsenic ar    | 17.2  | 160 |
| LDB3    | 11155  | Leukemia, MESH:D015473 | Daunorub      | 17.2  | 18  |
| MOGAT2  | 80168  | Leukemia, MESH:D015470 | Calcitriol C  | 17.2  | 7   |
| PAWR    | 5074   | Leukemia, MESH:D015473 | alpha-Toc     | 17.2  | 262 |
| TRPA1   | 8989   | Leukemia, MESH:D015470 | Benzene C     | 17.2  | 23  |
| UBD     | 10537  | Leukemia, MESH:D015473 | Arsenic Cr    | 17.2  | 154 |
| ACACA   | 31     | Leukemia, MESH:D015473 | Arsenic Ar    | 17.19 | 266 |
| ARHGAP1 | 392    | Leukemia, MESH:D015470 | Air Polluta   | 17.19 | 21  |
| COL1A2  | 1278   | Leukemia, MESH:D007948 | 2-(2-amin     | 17.19 | 4   |
| CPSF2   | 53981  | Leukemia, MESH:D015470 | Air Polluta   | 17.19 | 12  |
| CSRP1   | 1465   | Leukemia, MESH:D015470 | Arsenic Tr    | 17.19 | 21  |
| JUNB    | 3726   | Leukemia, MESH:D007948 | 2-(2-amin     | 17.19 | 3   |
| PHLPP1  | 23239  | Leukemia, MESH:D015470 | Arsenic Tr    | 17.19 | 20  |
| PLCXD2  | 257068 | Leukemia, MESH:D015470 | Calcitriol li | 17.19 | 9   |

|          |        |                        |              |       |     |
|----------|--------|------------------------|--------------|-------|-----|
| RGMB     | 285704 | Leukemia, MESH:D015470 | Calcitriol[C | 17.19 | 78  |
| S1PR1    | 1901   | Leukemia, MESH:D015470 | Benzene[C    | 17.19 | 29  |
| SRSF7    | 6432   | Leukemia, MESH:D015473 | Arsenic Tr   | 17.19 | 158 |
| TUG1     | 55000  | Leukemia, MESH:D015470 | Cyclophos    | 17.19 | 12  |
| ADAM10   | 102    | Leukemia, MESH:D015470 | Bortezomi    | 17.18 | 17  |
| AMMECR1  | 9949   | Leukemia, MESH:D015470 | Dexameth     | 17.18 | 13  |
| APPBP2   | 10513  | Leukemia, MESH:D015470 | Calcitriol[C | 17.18 | 13  |
| ARHGAP4  | 393    | Leukemia, MESH:D015470 | Calcitriol[C | 17.18 | 13  |
| ASCL2    | 430    | Leukemia, MESH:D015470 | Bezafibrat   | 17.18 | 9   |
| B3GAT1   | 27087  | Leukemia, MESH:D015470 | Decitabine   | 17.18 | 14  |
| BDH1     | 622    | Leukemia, MESH:D015473 | Arsenic Tr   | 17.18 | 261 |
| CACHD1   | 57685  | Leukemia, MESH:D015470 | Doxorubic    | 17.18 | 12  |
| CCDC50   | 152137 | Leukemia, MESH:D015470 | Doxorubic    | 17.18 | 13  |
| CHCHD7   | 79145  | Leukemia, MESH:D015470 | Arsenic Tr   | 17.18 | 19  |
| CLDN6    | 9074   | Leukemia, MESH:D015470 | Azacitidine  | 17.18 | 9   |
| CNTN1    | 1272   | Leukemia, MESH:D015470 | Arsenic Tr   | 17.18 | 20  |
| CPS1     | 1373   | Leukemia, MESH:D015473 | arsenite[D   | 17.18 | 154 |
| CX3CR1   | 1524   | Leukemia, MESH:D015470 | Air Polluta  | 17.18 | 14  |
| CYP39A1  | 51302  | Leukemia, MESH:D015470 | Arsenic Tr   | 17.18 | 14  |
| DOCK6    | 57572  | Leukemia, MESH:D015470 | Doxorubic    | 17.18 | 15  |
| EIF2AK2  | 5610   | Leukemia, MESH:D015473 | Arsenic Tr   | 17.18 | 263 |
| EPG5     | 57724  | Leukemia, MESH:D015470 | Dronabinc    | 17.18 | 11  |
| FOXP4    | 116113 | Leukemia, MESH:D015470 | Cyclophos    | 17.18 | 13  |
| GNA13    | 10672  | Leukemia, MESH:D015470 | Irinotecan   | 17.18 | 10  |
| GPR19    | 2842   | Leukemia, MESH:D015470 | Calcitriol[C | 17.18 | 76  |
| HECTD2   | 143279 | Leukemia, MESH:D015470 | Bortezomi    | 17.18 | 14  |
| HOXB2    | 3212   | Leukemia, MESH:D015470 | Dexameth     | 17.18 | 8   |
| ISCU     | 23479  | Leukemia, MESH:D015470 | Dexameth     | 17.18 | 13  |
| KIF5C    | 3800   | Leukemia, MESH:D015470 | Calcitriol[C | 17.18 | 14  |
| LIAS     | 11019  | Leukemia, MESH:D015470 | Dexameth     | 17.18 | 10  |
| MPST     | 4357   | Leukemia, MESH:D015470 | Air Polluta  | 17.18 | 15  |
| MRPS28   | 28957  | Leukemia, MESH:D015470 | Decitabine   | 17.18 | 16  |
| NKX2-1   | 7080   | Leukemia, MESH:D015470 | Decitabine   | 17.18 | 17  |
| NMNAT2   | 23057  | Leukemia, MESH:D015470 | Calcitriol[C | 17.18 | 12  |
| NMRK1    | 54981  | Leukemia, MESH:D015470 | Decitabine   | 17.18 | 16  |
| OTX1     | 5013   | Leukemia, MESH:D015470 | Air Polluta  | 17.18 | 9   |
| PIK3CB   | 5291   | Leukemia, MESH:D015470 | Arsenic Tr   | 17.18 | 20  |
| PPM1B    | 5495   | Leukemia, MESH:D015470 | Dexameth     | 17.18 | 9   |
| QSER1    | 79832  | Leukemia, MESH:D015470 | Dexameth     | 17.18 | 13  |
| RCHY1    | 25898  | Leukemia, MESH:D015470 | Arsenic Tr   | 17.18 | 27  |
| SAE1     | 10055  | Leukemia, MESH:D015470 | Arsenic Tr   | 17.18 | 19  |
| SAP30BP  | 29115  | Leukemia, MESH:D015470 | Dexameth     | 17.18 | 12  |
| SEC61A1  | 29927  | Leukemia, MESH:D015470 | Air Polluta  | 17.18 | 14  |
| SERPINA3 | 20716  | Leukemia, MESH:D015470 | Dexameth     | 17.18 | 14  |
| SERTAD1  | 29950  | Leukemia, MESH:D015473 | arsenite[C   | 17.18 | 157 |
| SGTA     | 6449   | Leukemia, MESH:D015470 | Dexameth     | 17.18 | 13  |
| SLC45A4  | 57210  | Leukemia, MESH:D015470 | Arsenic Tr   | 17.18 | 14  |
| SLC46A1  | 113235 | Leukemia, MESH:D015470 | Calcitriol[C | 17.18 | 22  |
| STEAP1   | 26872  | Leukemia, MESH:D015470 | Dasatinib[I  | 17.18 | 14  |
| STK40    | 83931  | Leukemia, MESH:D015470 | Benzene[C    | 17.18 | 26  |
| STON1    | 11037  | Leukemia, MESH:D015470 | Calcitriol[C | 17.18 | 76  |
| SUGT1    | 10910  | Leukemia, MESH:D015470 | Arsenic Tr   | 17.18 | 18  |
| SUMF1    | 285362 | Leukemia, MESH:D015470 | Dexameth     | 17.18 | 11  |
| TP53BP2  | 7159   | Leukemia, MESH:D015470 | Dexameth     | 17.18 | 9   |
| TRIP6    | 7205   | Leukemia, MESH:D015470 | Doxorubic    | 17.18 | 13  |
| TTN      | 7273   | Leukemia, MESH:D015470 | Air Polluta  | 17.18 | 14  |
| WDR72    | 256764 | Leukemia, MESH:D015470 | Calcitriol[C | 17.18 | 16  |
| CLPTM1   | 1209   | Leukemia, MESH:D015473 | Antimony     | 17.17 | 6   |



|         |        |                        |              |       |     |
|---------|--------|------------------------|--------------|-------|-----|
| FAM53B  | 9679   | Leukemia, MESH:D015470 | Doxorubic    | 17.17 | 13  |
| LMO3    | 55885  | Leukemia, MESH:D015470 | Dexameth     | 17.17 | 8   |
| MANSC1  | 54682  | Leukemia, MESH:D015470 | Doxorubic    | 17.17 | 14  |
| SNHG12  | 85028  | Leukemia, MESH:D015473 | Arsenic ar:  | 17.17 | 10  |
| AGAP2   | 116986 | Leukemia, MESH:D015473 | Arsenic ca   | 17.15 | 155 |
| APEX1   | 328    | Leukemia, MESH:D004915 | Daunorub     | 17.15 | 3   |
| CCL13   | 6357   | Leukemia, MESH:D015470 | Dexameth     | 17.15 | 7   |
| CSNK1G1 | 53944  | Leukemia, MESH:D015473 | Dexameth     | 17.15 | 8   |
| MIR210  | 406992 | Leukemia, MESH:D015473 | Arsenic Tr   | 17.15 | 260 |
| ZFPM2   | 23414  | Leukemia, MESH:D015473 | Arsenic Tr   | 17.15 | 263 |
| ACADVL  | 37     | Leukemia, MESH:D015473 | Arsenic De   | 17.14 | 157 |
| ARC     | 23237  | Leukemia, MESH:D015470 | Arsenic Tr   | 17.14 | 17  |
| CAMK2B  | 816    | Leukemia, MESH:D015470 | Doxorubic    | 17.14 | 15  |
| CLIP2   | 7461   | Leukemia, MESH:D015473 | arsenite D   | 17.14 | 153 |
| DNAH1   | 25981  | Leukemia, MESH:D015473 | Arsenic ar:  | 17.14 | 11  |
| IGH     | 3492   | Leukemia, MESH:D015470 | Dasatinib    | 17.14 | 15  |
| ILF2    | 3608   | Leukemia, MESH:D015473 | arsenite G   | 17.14 | 156 |
| MRPL33  | 9553   | Leukemia, MESH:D015473 | arsenite D   | 17.14 | 8   |
| PSMB8   | 5696   | Leukemia, MESH:D015473 | Arsenic Tr   | 17.14 | 261 |
| PUF60   | 22827  | Leukemia, MESH:D015473 | Arsenic Ar   | 17.14 | 161 |
| STX12   | 23673  | Leukemia, MESH:D015473 | Arsenic De   | 17.14 | 156 |
| TMEM91  | 641649 | Leukemia, MESH:D015470 | Calcitriol E | 17.14 | 15  |
| USP53   | 54532  | Leukemia, MESH:D015473 | arsenite Ci  | 17.14 | 155 |
| COQ7    | 10229  | Leukemia, MESH:D015473 | Dexameth     | 17.13 | 155 |
| RBFOX2  | 23543  | Leukemia, MESH:D015473 | arsenite D   | 17.13 | 155 |
| RPS26L  | 393715 | Leukemia, MESH:D015470 | Dexameth     | 17.13 | 10  |
| SDF2L1  | 23753  | Leukemia, MESH:D015473 | Arsenic Tr   | 17.13 | 263 |
| SLC32A1 | 140679 | Leukemia, MESH:D015473 | Arsenic ar:  | 17.13 | 157 |
| TJP2    | 9414   | Leukemia, MESH:D015473 | Arsenic Tr   | 17.13 | 263 |
| VPS41   | 27072  | Leukemia, MESH:D015473 | Arsenic Tr   | 17.13 | 262 |
| ZC3H11A | 9877   | Leukemia, MESH:D015473 | Arsenic Tr   | 17.13 | 262 |
| DICER1  | 23405  | Leukemia, MESH:D015470 | Clioquinol   | 17.12 | 13  |
| FUT3    | 2525   | Leukemia, MESH:D015470 | Arsenic Tr   | 17.12 | 20  |
| GPX4    | 2879   | Leukemia, MESH:D015473 | alpha-Toc    | 17.12 | 264 |
| MIR137  | 406928 | Leukemia, MESH:D015470 | Air Polluta  | 17.12 | 8   |
| MIR339  | 442907 | Leukemia, MESH:D015473 | Buthionine   | 17.12 | 155 |
| TCF24   | 1E+08  | Leukemia, MESH:D015470 | Arsenic Tr   | 17.12 | 14  |
| TUBGCP4 | 27229  | Leukemia, MESH:D015470 | Doxorubic    | 17.12 | 12  |
| ALDH3B1 | 221    | Leukemia, MESH:D015470 | Arsenic Tr   | 17.11 | 20  |
| C4ORF46 | 201725 | Leukemia, MESH:D015470 | Calcitriol E | 17.11 | 13  |
| CLTCL1  | 8218   | Leukemia, MESH:D015470 | Calcitriol E | 17.11 | 8   |
| CRISP2  | 7180   | Leukemia, MESH:D015470 | Decitabine   | 17.11 | 17  |
| HBD     | 3045   | Leukemia, MESH:D015470 | (+)-JQ1 α    | 17.11 | 10  |
| KARS1   | 3735   | Leukemia, MESH:D015470 | Doxorubic    | 17.11 | 11  |
| PDCD6IP | 10015  | Leukemia, MESH:D015470 | Calcitriol E | 17.11 | 11  |
| PFN2    | 5217   | Leukemia, MESH:D015470 | Arsenic Tr   | 17.11 | 15  |
| PGM3    | 5238   | Leukemia, MESH:D015470 | Arsenic Tr   | 17.11 | 14  |
| PNPLA2  | 57104  | Leukemia, MESH:D015473 | Dexameth     | 17.11 | 9   |
| SAMD10  | 140700 | Leukemia, MESH:D015470 | Bortezomi    | 17.11 | 12  |
| SLC22A8 | 9376   | Leukemia, MESH:D015470 | Allopurinc   | 17.11 | 16  |
| SNX22   | 79856  | Leukemia, MESH:D015470 | Decitabine   | 17.11 | 14  |
| STX3    | 6809   | Leukemia, MESH:D015470 | Benzene E    | 17.11 | 35  |
| ASAH1   | 427    | Leukemia, MESH:D015473 | Arsenic Tr   | 17.1  | 261 |
| BABAM1  | 29086  | Leukemia, MESH:D015470 | Arsenic Tr   | 17.1  | 18  |
| IFI27   | 3429   | Leukemia, MESH:D015473 | Calcitriol E | 17.1  | 153 |
| KIRREL1 | 55243  | Leukemia, MESH:D015470 | Doxorubic    | 17.1  | 13  |
| ZNF286A | 57335  | Leukemia, MESH:D015470 | Doxorubic    | 17.1  | 14  |
| ZNF710  | 374655 | Leukemia, MESH:D015470 | Doxorubic    | 17.1  | 12  |

|          |        |                        |              |       |     |
|----------|--------|------------------------|--------------|-------|-----|
| ATP5G2   | 67942  | Leukemia, MESH:D015473 | Arsenic Tr   | 17.09 | 261 |
| CPLX1    | 10815  | Leukemia, MESH:D015470 | Azacitidine  | 17.09 | 9   |
| CRADD    | 8738   | Leukemia, MESH:D015470 | Benzene[C    | 17.09 | 20  |
| CRYBG2   | 55057  | Leukemia, MESH:D015470 | Decitabine   | 17.09 | 16  |
| CYP7A1   | 1581   | Leukemia, MESH:D007948 | 2-(2-amin    | 17.09 | 2   |
| IBTK     | 25998  | Leukemia, MESH:D015470 | Bortezomi    | 17.09 | 15  |
| KRT19    | 3880   | Leukemia, MESH:D004915 | Cytarabine   | 17.09 | 2   |
| NELFA    | 7469   | Leukemia, MESH:D015470 | alvocidib[C  | 17.09 | 9   |
| PHB1     | 5245   | Leukemia, MESH:D015473 | Arsenic Tr   | 17.09 | 263 |
| SH3TC1   | 54436  | Leukemia, MESH:D015470 | Calcitriol[C | 17.09 | 7   |
| SLAMF7   | 57823  | Leukemia, MESH:D015470 | Air Polluta  | 17.09 | 13  |
| SLC47A1  | 55244  | Leukemia, MESH:D015470 | Chlorampl    | 17.09 | 82  |
| USP18    | 11274  | Leukemia, MESH:D015473 | Arsenic[De   | 17.09 | 158 |
| ABCB10   | 23456  | Leukemia, MESH:D015470 | Calcitriol[C | 17.08 | 14  |
| AGPAT5   | 55326  | Leukemia, MESH:D015473 | Arsenic Tr   | 17.08 | 262 |
| ARFIP1   | 27236  | Leukemia, MESH:D015470 | Air Polluta  | 17.08 | 16  |
| ARHGAP1  | 84986  | Leukemia, MESH:D015470 | Arsenic Tr   | 17.08 | 28  |
| CERS4    | 79603  | Leukemia, MESH:D015473 | Arsenic[Ar   | 17.08 | 160 |
| CNMD     | 11061  | Leukemia, MESH:D015470 | Arsenic Tr   | 17.08 | 16  |
| COL4A4   | 1286   | Leukemia, MESH:D015470 | Doxorubic    | 17.08 | 14  |
| CSGALNA  | 55454  | Leukemia, MESH:D015470 | Dexameth     | 17.08 | 8   |
| CTDSP12  | 51496  | Leukemia, MESH:D015470 | Bortezomi    | 17.08 | 15  |
| DERL1    | 79139  | Leukemia, MESH:D015470 | Dexameth     | 17.08 | 15  |
| EPB41L4A | 64097  | Leukemia, MESH:D015470 | Dronabinc    | 17.08 | 9   |
| FMN1     | 342184 | Leukemia, MESH:D015470 | Chloroqui    | 17.08 | 7   |
| HOXB5    | 3215   | Leukemia, MESH:D015470 | Alitretnoi   | 17.08 | 8   |
| LGALS7   | 3963   | Leukemia, MESH:D015470 | Cyclophos    | 17.08 | 15  |
| S100A2   | 6273   | Leukemia, MESH:D015470 | Arsenic Tr   | 17.08 | 21  |
| SAMM50   | 25813  | Leukemia, MESH:D015470 | Decitabine   | 17.08 | 15  |
| SELENOK  | 58515  | Leukemia, MESH:D015470 | Air Polluta  | 17.08 | 13  |
| SLC4A11  | 83959  | Leukemia, MESH:D015473 | arsenite[C   | 17.08 | 154 |
| SRPRA    | 6734   | Leukemia, MESH:D015470 | Methotrex    | 17.08 | 9   |
| TPK1     | 27010  | Leukemia, MESH:D015470 | Cytarabine   | 17.08 | 80  |
| TUB      | 7275   | Leukemia, MESH:D015470 | Calcitriol[C | 17.08 | 16  |
| UBE2G2   | 7327   | Leukemia, MESH:D015470 | Ifosfamide   | 17.08 | 11  |
| USP12    | 219333 | Leukemia, MESH:D015470 | Doxorubic    | 17.08 | 17  |
| WAPL     | 23063  | Leukemia, MESH:D015470 | Arsenic Tr   | 17.08 | 16  |
| YIPF5    | 81555  | Leukemia, MESH:D015470 | Doxorubic    | 17.08 | 13  |
| ZBED1    | 9189   | Leukemia, MESH:D004915 | Doxorubic    | 17.08 | 3   |
| ACTR2    | 10097  | Leukemia, MESH:D015473 | Dexameth     | 17.07 | 153 |
| AMOT     | 154796 | Leukemia, MESH:D015470 | Arsenic Tr   | 17.07 | 18  |
| CIB2     | 10518  | Leukemia, MESH:D015470 | Dexameth     | 17.07 | 9   |
| CORO2B   | 10391  | Leukemia, MESH:D015470 | Dexameth     | 17.07 | 8   |
| ETV3     | 2117   | Leukemia, MESH:D015470 | Arsenic Tr   | 17.07 | 18  |
| GNA11    | 2767   | Leukemia, MESH:D015473 | Arsenic[Ar   | 17.07 | 161 |
| MAML2    | 84441  | Leukemia, MESH:D015470 | Doxorubic    | 17.07 | 12  |
| MLLT10   | 8028   | Leukemia, MESH:D015473 | Arsenic[Ar   | 17.07 | 261 |
| NECTIN4  | 81607  | Leukemia, MESH:D015473 | Arsenic[ar   | 17.07 | 11  |
| OGDHL    | 55753  | Leukemia, MESH:D015470 | Doxorubic    | 17.07 | 14  |
| PES1     | 23481  | Leukemia, MESH:D015470 | Dexameth     | 17.07 | 14  |
| PMPCB    | 9512   | Leukemia, MESH:D015470 | Arsenic Tr   | 17.07 | 20  |
| RASA2    | 5922   | Leukemia, MESH:D015470 | Doxorubic    | 17.07 | 14  |
| RCOR1    | 23186  | Leukemia, MESH:D015470 | Doxorubic    | 17.07 | 14  |
| RGS20    | 8601   | Leukemia, MESH:D015473 | arsenite[C   | 17.07 | 157 |
| SEC22B   | 9554   | Leukemia, MESH:D015470 | Dexameth     | 17.07 | 14  |
| SH3RF3   | 344558 | Leukemia, MESH:D015470 | Doxorubic    | 17.07 | 13  |
| STN1     | 79991  | Leukemia, MESH:D015470 | Dexameth     | 17.07 | 13  |
| TRAPPC9  | 83696  | Leukemia, MESH:D015470 | Dexameth     | 17.07 | 12  |

|          |        |                        |              |       |     |
|----------|--------|------------------------|--------------|-------|-----|
| TTC30B   | 150737 | Leukemia, MESH:D015470 | Dexameth     | 17.07 | 8   |
| VANGL2   | 57216  | Leukemia, MESH:D015470 | Doxorubic    | 17.07 | 14  |
| VEGFA    | 7422   | Leukemia, MESH:D007948 | 2-(2-amin    | 17.07 | 3   |
| VRK2     | 7444   | Leukemia, MESH:D015470 | Cytarabine   | 17.07 | 80  |
| ZNF292   | 23036  | Leukemia, MESH:D015470 | Dexameth     | 17.07 | 10  |
| ADCY4    | 196883 | Leukemia, MESH:D015473 | arsenite D   | 17.06 | 155 |
| CCDC88C  | 440193 | Leukemia, MESH:D015473 | Arsenic Ca   | 17.06 | 156 |
| CCL26    | 10344  | Leukemia, MESH:D015473 | Arsenic ar   | 17.06 | 13  |
| CREB3L1  | 90993  | Leukemia, MESH:D015473 | Arsenic Ca   | 17.06 | 156 |
| ELP4     | 26610  | Leukemia, MESH:D015473 | Calcitriol E | 17.06 | 153 |
| GCLC     | 2729   | Leukemia, MESH:D004915 | Doxorubic    | 17.06 | 4   |
| LOX      | 4015   | Leukemia, MESH:D015473 | Arsenic ar   | 17.06 | 161 |
| LRRC17   | 10234  | Leukemia, MESH:D015473 | arsenite D   | 17.06 | 154 |
| PDGFB    | 5155   | Leukemia, MESH:D015473 | arsenite G   | 17.06 | 156 |
| PDSS1    | 23590  | Leukemia, MESH:D015473 | arsenite C   | 17.06 | 157 |
| TMEM64   | 169200 | Leukemia, MESH:D015473 | Dexameth     | 17.06 | 155 |
| ULBP1    | 80329  | Leukemia, MESH:D015473 | Arsenic Tr   | 17.06 | 263 |
| AMPD3    | 272    | Leukemia, MESH:D015473 | Calcitriol E | 17.05 | 154 |
| CAMK2N1  | 55450  | Leukemia, MESH:D015470 | Cytarabine   | 17.05 | 85  |
| CCKBR    | 887    | Leukemia, MESH:D015470 | Cytarabine   | 17.05 | 78  |
| CTTN     | 2017   | Leukemia, MESH:D015473 | Arsenic Ar   | 17.05 | 266 |
| FCGR2C   | 9103   | Leukemia, MESH:D015470 | Cytarabine   | 17.05 | 74  |
| GABARAP  | 11337  | Leukemia, MESH:D015473 | arsenite D   | 17.05 | 157 |
| GSTM4    | 2948   | Leukemia, MESH:D015473 | Arsenic Ar   | 17.05 | 263 |
| HTATSF1  | 27336  | Leukemia, MESH:D015473 | Arsenic Ar   | 17.05 | 263 |
| MYBL1    | 4603   | Leukemia, MESH:D015473 | Arsenic Tr   | 17.05 | 260 |
| RAC2     | 5880   | Leukemia, MESH:D015473 | Arsenic Ar   | 17.05 | 265 |
| TUBA1C   | 84790  | Leukemia, MESH:D015473 | arsenite D   | 17.05 | 158 |
| ATP7B    | 540    | Leukemia, MESH:D015470 | Carboplati   | 17.04 | 82  |
| CA3      | 761    | Leukemia, MESH:D015470 | Arsenic Tr   | 17.04 | 14  |
| GAL      | 51083  | Leukemia, MESH:D015470 | Calcitriol C | 17.04 | 15  |
| GINS1    | 9837   | Leukemia, MESH:D015470 | Calcitriol E | 17.04 | 11  |
| GNF      | 10020  | Leukemia, MESH:D015470 | Arsenic Tr   | 17.04 | 22  |
| MMP8     | 4317   | Leukemia, MESH:D015470 | Calcitriol C | 17.04 | 16  |
| POU5F1P4 | 645682 | Leukemia, MESH:D015470 | Cytarabine   | 17.04 | 74  |
| PPM1G    | 5496   | Leukemia, MESH:D015473 | Arsenic Bu   | 17.04 | 156 |
| PSMC2    | 5701   | Leukemia, MESH:D015470 | Arsenic Tr   | 17.04 | 19  |
| RAB6C    | 84084  | Leukemia, MESH:D015470 | Decitabine   | 17.04 | 18  |
| VGF      | 7425   | Leukemia, MESH:D015470 | Indometha    | 17.04 | 12  |
| SOD2     | 6648   | Leukemia, MESH:D007948 | 2-(2-amin    | 17.03 | 3   |
| GIMAP2   | 26157  | Leukemia, MESH:D015470 | Calcitriol M | 17.02 | 7   |
| IFITM4P  | 340198 | Leukemia, MESH:D015470 | Dexameth     | 17.02 | 4   |
| NQO1     | 1728   | Leukemia, MESH:D007948 | 2-(2-amin    | 17.02 | 3   |
| SOX19A   | 30038  | Leukemia, MESH:D015470 | Dexameth     | 17.02 | 5   |
| TMSB     | 402820 | Leukemia, MESH:D015470 | Pentachlo    | 17.02 | 6   |
| TYMP     | 1890   | Leukemia, MESH:D015473 | Arsenic Tr   | 17.02 | 157 |
| AK5      | 26289  | Leukemia, MESH:D015473 | Calcitriol E | 17.01 | 152 |
| ECI1     | 1632   | Leukemia, MESH:D015473 | Arsenic Ar   | 17.01 | 268 |
| H3-4     | 8290   | Leukemia, MESH:D007948 | 2-(2-amin    | 17.01 | 2   |
| NEFM     | 4741   | Leukemia, MESH:D015473 | Arsenic ar   | 17.01 | 157 |
| P2RX5    | 5026   | Leukemia, MESH:D015473 | Genistein    | 17.01 | 157 |
| PCOTH    | 542767 | Leukemia, MESH:D015470 | (+)-JQ1 c    | 17.01 | 7   |
| RHOC     | 389    | Leukemia, MESH:D015473 | Arsenic Tr   | 17.01 | 264 |
| SELENOW  | 378438 | Leukemia, MESH:D015470 | Dexameth     | 17.01 | 5   |
| SELL     | 6402   | Leukemia, MESH:D015473 | Genistein    | 17.01 | 158 |
| SMAD2    | 4087   | Leukemia, MESH:D004915 | Doxorubic    | 17.01 | 3   |
| DCAF4L1  | 285429 | Leukemia, MESH:D015470 | Dronabinc    | 17    | 5   |
| ELK1     | 2002   | Leukemia, MESH:D015473 | Arsenic Tr   | 17    | 156 |

|          |        |                            |              |       |     |
|----------|--------|----------------------------|--------------|-------|-----|
| EPHB1    | 2047   | Leukemia, MESH:D015470     | Decitabine   | 17    | 18  |
| GRIK3    | 2899   | Leukemia, MESH:D015473     | Arsenic Ar   | 17    | 160 |
| NCL      | 4691   | Leukemia, MESH:D015473     | Arsenic Ar   | 17    | 262 |
| ZNF28    | 7576   | Leukemia, MESH:D015470     | Arsenic Tr   | 17    | 16  |
| ACTG1    | 71     | Leukemia, MESH:D015470     | Arsenic Tr   | 16.99 | 23  |
| ANKRD33  | 651746 | Leukemia, MESH:D015473     | Arsenic De   | 16.99 | 156 |
| BTBD3    | 22903  | Leukemia, MESH:D015470     | Arsenic Tr   | 16.99 | 25  |
| C16ORF54 | 283897 | Leukemia, MESH:D015470     | Dronabinc    | 16.99 | 6   |
| CDH8     | 1006   | Leukemia, MESH:D015473     | Arsenic Tr   | 16.99 | 156 |
| ELANE    | 1991   | Leukemia, MESH:D015470     | Deferoxan    | 16.99 | 9   |
| GDF9     | 2661   | Leukemia, MESH:D015470     | Azacitidine  | 16.99 | 11  |
| HACD2    | 201562 | Leukemia, MESH:D015473     | Arsenic Ca   | 16.99 | 157 |
| PROS1    | 5627   | Leukemia, MESH:D015470     | Decitabine   | 16.99 | 24  |
| SCUBE2   | 57758  | Leukemia, MESH:D015473     | Arsenic Ar   | 16.99 | 159 |
| SH3GL3   | 6457   | Leukemia, MESH:D015473     | Arsenic ar:  | 16.99 | 156 |
| UGGT2    | 55757  | Leukemia, MESH:D015473     | Arsenic De   | 16.99 | 156 |
| VPS13B   | 157680 | Leukemia, MESH:D015473     | Arsenic De   | 16.99 | 156 |
| DLEU2    | 8847   | Leukemia, MESH:D01marker/m | Arsenic Tr   | 16.98 | 20  |
| ALOX15   | 246    | Leukemia, MESH:D015473     | alpha-Toc    | 16.98 | 155 |
| CABIN1   | 23523  | Leukemia, MESH:D015470     | Arsenic Tr   | 16.98 | 19  |
| DNAJC6   | 9829   | Leukemia, MESH:D015473     | Arsenic ar:  | 16.98 | 11  |
| DPM3     | 54344  | Leukemia, MESH:D015470     | Dexameth     | 16.98 | 13  |
| DROSHA   | 29102  | Leukemia, MESH:D015473     | Arsenic ar:  | 16.98 | 157 |
| ERCC3    | 2071   | Leukemia, MESH:D015473     | Arsenic Ge   | 16.98 | 157 |
| EVI5     | 7813   | Leukemia, MESH:D015470     | Calcitriol   | 16.98 | 18  |
| FASTKD2  | 22868  | Leukemia, MESH:D015470     | Dexameth     | 16.98 | 10  |
| FER      | 2241   | Leukemia, MESH:D015470     | Arsenic Tr   | 16.98 | 17  |
| FGFR1OP2 | 26127  | Leukemia, MESH:D015470     | Arsenic Tr   | 16.98 | 14  |
| GAK      | 2580   | Leukemia, MESH:D015473     | Arsenic Ar   | 16.98 | 263 |
| GEMIN6   | 79833  | Leukemia, MESH:D015473     | arsenite D   | 16.98 | 155 |
| GP1BB    | 2812   | Leukemia, MESH:D015470     | Benzene C    | 16.98 | 24  |
| HGS      | 9146   | Leukemia, MESH:D015470     | Dexameth     | 16.98 | 14  |
| LUZP1    | 7798   | Leukemia, MESH:D015470     | Doxorubic    | 16.98 | 13  |
| MPC2     | 25874  | Leukemia, MESH:D015470     | Cyclophos    | 16.98 | 21  |
| OTUD7B   | 56957  | Leukemia, MESH:D015470     | Calcitriol C | 16.98 | 15  |
| PFDN2    | 5202   | Leukemia, MESH:D015470     | Benzene C    | 16.98 | 21  |
| PHC3     | 80012  | Leukemia, MESH:D015470     | Bortezomi    | 16.98 | 14  |
| PI4KA    | 5297   | Leukemia, MESH:D015473     | Arsenic Ar   | 16.98 | 160 |
| PRSS1    | 5644   | Leukemia, MESH:D015470     | Arsenic Tr   | 16.98 | 16  |
| SEM1     | 7979   | Leukemia, MESH:D015470     | Arsenic Tr   | 16.98 | 14  |
| SF3A2    | 8175   | Leukemia, MESH:D015470     | (+)-JQ1 c    | 16.98 | 9   |
| SLC8B1   | 80024  | Leukemia, MESH:D015470     | Ethylnitros  | 16.98 | 11  |
| SNRPD3   | 6634   | Leukemia, MESH:D015473     | Arsenic Tr   | 16.98 | 156 |
| SRSF4    | 6429   | Leukemia, MESH:D015470     | Air Polluta  | 16.98 | 14  |
| SSBP3    | 23648  | Leukemia, MESH:D015473     | Arsenic Tr   | 16.98 | 262 |
| TIMELESS | 8914   | Leukemia, MESH:D015470     | Arsenic Tr   | 16.98 | 17  |
| IDH2     | 3418   | Leukemia, MESH:D01marker/m | Arsenic Ar   | 16.97 | 267 |
| ABCD3    | 5825   | Leukemia, MESH:D015473     | alpha-Toc    | 16.97 | 154 |
| ARHGEF1  | 9138   | Leukemia, MESH:D015470     | Dexameth     | 16.97 | 13  |
| CBR4     | 84869  | Leukemia, MESH:D015470     | Arsenic Tr   | 16.97 | 25  |
| CHCHD2   | 51142  | Leukemia, MESH:D015470     | Doxorubic    | 16.97 | 16  |
| CLDN12   | 9069   | Leukemia, MESH:D015470     | Calcitriol C | 16.97 | 13  |
| COMMD3   | 23412  | Leukemia, MESH:D015470     | Decitabine   | 16.97 | 17  |
| CYP2C29  | 13095  | Leukemia, MESH:D015473     | alpha-Toc    | 16.97 | 155 |
| FSHB     | 2488   | Leukemia, MESH:D007948     | 2-(2-amin    | 16.97 | 2   |
| GJA3     | 2700   | Leukemia, MESH:D015470     | Doxorubic    | 16.97 | 14  |
| GMPR2    | 51292  | Leukemia, MESH:D015470     | Dexameth     | 16.97 | 11  |
| HNRNPA2  | 3181   | Leukemia, MESH:D015473     | Arsenic Tr   | 16.97 | 262 |

|          |        |                        |              |       |     |
|----------|--------|------------------------|--------------|-------|-----|
| KIF3C    | 3797   | Leukemia, MESH:D015470 | Calcitriol C | 16.97 | 13  |
| LIN7C    | 55327  | Leukemia, MESH:D015470 | Arsenic Tr   | 16.97 | 18  |
| METTL1   | 4234   | Leukemia, MESH:D015470 | Arsenic Tr   | 16.97 | 19  |
| MTA2     | 9219   | Leukemia, MESH:D015470 | Dexameth     | 16.97 | 7   |
| NXPE3    | 91775  | Leukemia, MESH:D015470 | Bortezomi    | 16.97 | 14  |
| PPP1CA   | 5499   | Leukemia, MESH:D015470 | Arsenic Tr   | 16.97 | 21  |
| PPP3R1   | 5534   | Leukemia, MESH:D015470 | Bortezomi    | 16.97 | 14  |
| PPTC7    | 160760 | Leukemia, MESH:D015470 | Doxorubic    | 16.97 | 13  |
| PRMT6    | 55170  | Leukemia, MESH:D015470 | Pentachlo    | 16.97 | 10  |
| RAB3C    | 115827 | Leukemia, MESH:D015470 | Dexameth     | 16.97 | 8   |
| SH3BP5   | 9467   | Leukemia, MESH:D015470 | Dexameth     | 16.97 | 10  |
| STRN     | 6801   | Leukemia, MESH:D015470 | Doxorubic    | 16.97 | 13  |
| TEX2     | 55852  | Leukemia, MESH:D015470 | Dexameth     | 16.97 | 8   |
| TFAP2B   | 7021   | Leukemia, MESH:D015470 | Dexameth     | 16.97 | 8   |
| TP53     | 7157   | Leukemia, MESH:D004915 | Cytarabine   | 16.97 | 3   |
| TUBE1    | 51175  | Leukemia, MESH:D015470 | Doxorubic    | 16.97 | 13  |
| UTP4     | 84916  | Leukemia, MESH:D015470 | Dexameth     | 16.97 | 10  |
| VPS29    | 51699  | Leukemia, MESH:D015470 | Doxorubic    | 16.97 | 13  |
| ABCA9    | 10350  | Leukemia, MESH:D015470 | Arsenic Tr   | 16.96 | 18  |
| FUS      | 2521   | Leukemia, MESH:D015473 | Arsenic Ca   | 16.96 | 156 |
| LTB      | 4050   | Leukemia, MESH:D015473 | Arsenic Ar   | 16.96 | 264 |
| BCL2A1A  | 12044  | Leukemia, MESH:D015473 | Arsenic Tr   | 16.95 | 262 |
| RAD9B    | 144715 | Leukemia, MESH:D015470 | Dronabinc    | 16.95 | 10  |
| XDH      | 7498   | Leukemia, MESH:D015473 | Arsenic ar:  | 16.95 | 160 |
| ABAT     | 18     | Leukemia, MESH:D015470 | Calcitriol C | 16.94 | 16  |
| CDKN2A   | 1029   | Leukemia, MESH:D007948 | Arsenic Tr   | 16.94 | 3   |
| CMIP     | 80790  | Leukemia, MESH:D015473 | Arsenic Tr   | 16.94 | 263 |
| CRYGS    | 1427   | Leukemia, MESH:D015470 | Alitretinoi  | 16.94 | 7   |
| HHLA3    | 11147  | Leukemia, MESH:D015470 | Arsenic Tr   | 16.94 | 20  |
| ATPAF2   | 91647  | Leukemia, MESH:D015470 | Doxorubic    | 16.93 | 13  |
| CIPC     | 85457  | Leukemia, MESH:D015470 | Doxorubic    | 16.93 | 12  |
| EXD3     | 54932  | Leukemia, MESH:D015470 | Dexameth     | 16.93 | 11  |
| IRX1     | 79192  | Leukemia, MESH:D015473 | arsenite G   | 16.93 | 156 |
| KIAA0513 | 9764   | Leukemia, MESH:D015470 | Calcitriol ( | 16.93 | 7   |
| LCE1B    | 353132 | Leukemia, MESH:D015473 | Arsenic ar:  | 16.93 | 155 |
| METTL13  | 51603  | Leukemia, MESH:D015470 | Air Polluta  | 16.93 | 11  |
| PITPNB   | 23760  | Leukemia, MESH:D015473 | Dexameth     | 16.93 | 157 |
| PLEKHG3  | 26030  | Leukemia, MESH:D015473 | Arsenic Ar   | 16.93 | 165 |
| PVRL1    | 1E+08  | Leukemia, MESH:D015470 | Arsenic Tr   | 16.93 | 19  |
| S100A16  | 140576 | Leukemia, MESH:D015473 | Genistein I  | 16.93 | 154 |
| TMEM198  | 440104 | Leukemia, MESH:D015470 | Dexameth     | 16.93 | 6   |
| TRRAP    | 8295   | Leukemia, MESH:D015473 | Arsenic Ar   | 16.93 | 267 |
| VGLL4    | 9686   | Leukemia, MESH:D015473 | Arsenic Ar   | 16.93 | 166 |
| C2ORF68  | 388969 | Leukemia, MESH:D015470 | Dexameth     | 16.92 | 6   |
| CA11     | 770    | Leukemia, MESH:D015470 | Doxorubic    | 16.92 | 12  |
| CCDC177  | 56936  | Leukemia, MESH:D015470 | Dexameth     | 16.92 | 7   |
| CHMP3    | 51652  | Leukemia, MESH:D015470 | Doxorubic    | 16.92 | 11  |
| DENND11  | 57189  | Leukemia, MESH:D015470 | Doxorubic    | 16.92 | 12  |
| LIF      | 3976   | Leukemia, MESH:D004915 | Doxorubic    | 16.92 | 3   |
| MCOLN3   | 55283  | Leukemia, MESH:D015473 | Arsenic Tr   | 16.92 | 263 |
| NCAPD3   | 23310  | Leukemia, MESH:D015473 | arsenite D   | 16.92 | 154 |
| OTOGL    | 283310 | Leukemia, MESH:D015470 | Dexameth     | 16.92 | 11  |
| PSTPIP2  | 9050   | Leukemia, MESH:D015473 | Cytarabine   | 16.92 | 155 |
| RAB4A    | 5867   | Leukemia, MESH:D015473 | arsenite G   | 16.92 | 158 |
| SERHL    | 94009  | Leukemia, MESH:D015473 | Calcitriol C | 16.92 | 6   |
| SNURF    | 8926   | Leukemia, MESH:D015470 | Dexameth     | 16.92 | 13  |
| UMPS     | 7372   | Leukemia, MESH:D015470 | Benzoates    | 16.92 | 11  |
| CCN5     | 8839   | Leukemia, MESH:D015470 | Arsenic Tr   | 16.91 | 19  |

|          |        |                        |              |       |     |
|----------|--------|------------------------|--------------|-------|-----|
| GPI      | 2821   | Leukemia, MESH:D015470 | Arsenic Tr   | 16.91 | 16  |
| LIN7A    | 8825   | Leukemia, MESH:D015470 | Calcitriol C | 16.91 | 17  |
| NLRC5    | 84166  | Leukemia, MESH:D015473 | Arsenic Ca   | 16.91 | 10  |
| PABPC1   | 26986  | Leukemia, MESH:D015470 | Dexameth     | 16.91 | 21  |
| PLAC8    | 51316  | Leukemia, MESH:D015470 | Doxorubic    | 16.91 | 16  |
| PRKAG1   | 5571   | Leukemia, MESH:D015473 | Arsenic ar:  | 16.91 | 158 |
| RRS1     | 23212  | Leukemia, MESH:D015470 | Dexameth     | 16.91 | 8   |
| SAC3D1   | 29901  | Leukemia, MESH:D015473 | arsenite D   | 16.91 | 8   |
| STING1   | 340061 | Leukemia, MESH:D015473 | Arsenic ar:  | 16.91 | 11  |
| STRN3    | 29966  | Leukemia, MESH:D015473 | Arsenic Tr   | 16.91 | 156 |
| UBE2D2   | 7322   | Leukemia, MESH:D015473 | Arsenic Ar   | 16.91 | 265 |
| GBA      | 2629   | Leukemia, MESH:D015473 | Arsenic Tr   | 16.9  | 261 |
| CIDEC    | 63924  | Leukemia, MESH:D015470 | 15-deoxy-    | 16.89 | 10  |
| CTPS     | 51797  | Leukemia, MESH:D015470 | Air Polluta  | 16.89 | 9   |
| HSP90AA1 | 30591  | Leukemia, MESH:D015473 | Arsenic Ar   | 16.89 | 158 |
| PDS5B    | 23047  | Leukemia, MESH:D015470 | Androgen     | 16.89 | 11  |
| TNFAIP2  | 7127   | Leukemia, MESH:D015473 | Calcitriol N | 16.89 | 156 |
| ANLN     | 54443  | Leukemia, MESH:D015473 | arsenite Ci  | 16.88 | 10  |
| BET1     | 10282  | Leukemia, MESH:D015470 | Benzene P    | 16.88 | 24  |
| BLMH     | 642    | Leukemia, MESH:D015470 | Carboplati   | 16.88 | 14  |
| CDCA4    | 55038  | Leukemia, MESH:D015470 | Calcitriol C | 16.88 | 9   |
| CHRND    | 1144   | Leukemia, MESH:D015470 | Dexameth     | 16.88 | 7   |
| CYFIP1   | 23191  | Leukemia, MESH:D015470 | Benzoates    | 16.88 | 13  |
| DTNB     | 1838   | Leukemia, MESH:D015470 | Bezafibrat   | 16.88 | 9   |
| GRHL3    | 57822  | Leukemia, MESH:D015470 | Calcitriol C | 16.88 | 15  |
| MCCC1    | 56922  | Leukemia, MESH:D015470 | Dexameth     | 16.88 | 13  |
| MIR181D  | 574457 | Leukemia, MESH:D015473 | Arsenic Tr   | 16.88 | 260 |
| MIR19A   | 406979 | Leukemia, MESH:D015470 | Arsenic Tr   | 16.88 | 30  |
| OPA1     | 4976   | Leukemia, MESH:D015473 | Arsenic Tr   | 16.88 | 157 |
| OSBPL2   | 9885   | Leukemia, MESH:D015470 | Bortezomi    | 16.88 | 16  |
| PELI2    | 57161  | Leukemia, MESH:D015470 | Doxorubic    | 16.88 | 16  |
| POU2AF1  | 5450   | Leukemia, MESH:D015470 | Calcitriol ( | 16.88 | 11  |
| PRTN3    | 5657   | Leukemia, MESH:D015470 | Arsenic Tr   | 16.88 | 15  |
| RAC3     | 5881   | Leukemia, MESH:D015470 | Doxorubic    | 16.88 | 14  |
| SHROOM1  | 357    | Leukemia, MESH:D015470 | Calcitriol C | 16.88 | 8   |
| SLC8A1   | 6546   | Leukemia, MESH:D015473 | Arsenic Ar   | 16.88 | 160 |
| TNFAIP1  | 7126   | Leukemia, MESH:D015470 | Air Polluta  | 16.88 | 8   |
| VPS53    | 55275  | Leukemia, MESH:D015470 | Arsenic Tr   | 16.88 | 18  |
| ADCY8    | 114    | Leukemia, MESH:D015470 | Dexameth     | 16.87 | 12  |
| CUTC     | 51076  | Leukemia, MESH:D015470 | Dexameth     | 16.87 | 7   |
| DGKI     | 9162   | Leukemia, MESH:D015470 | Arsenic Tr   | 16.87 | 18  |
| DISC1    | 27185  | Leukemia, MESH:D015470 | Decitabine   | 16.87 | 19  |
| EFNB3    | 1949   | Leukemia, MESH:D015470 | Decitabine   | 16.87 | 20  |
| FAM110B  | 90362  | Leukemia, MESH:D015470 | Arsenic Tr   | 16.87 | 15  |
| FOS      | 2353   | Leukemia, MESH:D007948 | 2-(2-amin    | 16.87 | 3   |
| IFNG     | 3458   | Leukemia, MESH:D007948 | 2-(2-amin    | 16.87 | 3   |
| IGSF10   | 285313 | Leukemia, MESH:D015470 | Dexameth     | 16.87 | 7   |
| KDSR     | 2531   | Leukemia, MESH:D015470 | Doxorubic    | 16.87 | 16  |
| LRP12    | 29967  | Leukemia, MESH:D015470 | Air Polluta  | 16.87 | 12  |
| MAP4K5   | 11183  | Leukemia, MESH:D015470 | Doxorubic    | 16.87 | 14  |
| MIR145   | 406937 | Leukemia, MESH:D015470 | Decitabine   | 16.87 | 16  |
| NAPG     | 8774   | Leukemia, MESH:D015470 | Arsenic Tr   | 16.87 | 19  |
| POLR3H   | 171568 | Leukemia, MESH:D015470 | Bortezomi    | 16.87 | 13  |
| RAB25    | 57111  | Leukemia, MESH:D015470 | Arsenic Tr   | 16.87 | 13  |
| RAB43    | 339122 | Leukemia, MESH:D015470 | Methotrex    | 16.87 | 13  |
| RASSF8   | 11228  | Leukemia, MESH:D015470 | Arsenic Tr   | 16.87 | 14  |
| SCFD2    | 152579 | Leukemia, MESH:D015470 | Dexameth     | 16.87 | 12  |
| SPNS2    | 124976 | Leukemia, MESH:D015470 | Dronabinc    | 16.87 | 10  |

|          |        |                        |              |       |     |
|----------|--------|------------------------|--------------|-------|-----|
| SYNGR3   | 9143   | Leukemia, MESH:D015470 | Calcitriol C | 16.87 | 14  |
| TGFB1    | 7040   | Leukemia, MESH:D007948 | 2-(2-amin    | 16.87 | 3   |
| UIMC1    | 51720  | Leukemia, MESH:D015470 | Arsenic Tr   | 16.87 | 18  |
| PDE8A    | 5151   | Leukemia, MESH:D015473 | Arsenic Ar   | 16.86 | 265 |
| CXCR5    | 643    | Leukemia, MESH:D015473 | Arsenic Ge   | 16.85 | 159 |
| CYP1A1   | 1543   | Leukemia, MESH:D004915 | Daunorub     | 16.85 | 4   |
| DEGS1    | 8560   | Leukemia, MESH:D015473 | Arsenic ca   | 16.85 | 155 |
| HSD17B7  | 51478  | Leukemia, MESH:D015470 | Androgen     | 16.85 | 12  |
| MUC5AC   | 4586   | Leukemia, MESH:D015470 | Air Polluta  | 16.85 | 13  |
| NGEF     | 25791  | Leukemia, MESH:D015470 | Daunorub     | 16.85 | 36  |
| BBOX1    | 8424   | Leukemia, MESH:D015470 | Dexameth     | 16.84 | 16  |
| CCL6     | 20305  | Leukemia, MESH:D015473 | arsenite D   | 16.84 | 13  |
| COX5A    | 9377   | Leukemia, MESH:D015470 | Arsenic Tr   | 16.84 | 28  |
| CRK      | 1398   | Leukemia, MESH:D015470 | Benzene C    | 16.84 | 22  |
| GSK3A    | 2931   | Leukemia, MESH:D015470 | Bortezomi    | 16.84 | 20  |
| GSTA1    | 2938   | Leukemia, MESH:D015473 | Arsenic Tr   | 16.84 | 157 |
| HNRNPC   | 3183   | Leukemia, MESH:D015470 | Doxorubic    | 16.84 | 16  |
| HRK      | 8739   | Leukemia, MESH:D015470 | Arsenic Tr   | 16.84 | 26  |
| KLKB1    | 3818   | Leukemia, MESH:D015470 | Air Polluta  | 16.84 | 18  |
| LRATD2   | 157638 | Leukemia, MESH:D015473 | arsenite Ci  | 16.84 | 154 |
| NOL6     | 65083  | Leukemia, MESH:D015473 | Arsenic Tr   | 16.84 | 154 |
| NT5DC2   | 64943  | Leukemia, MESH:D015470 | Air Polluta  | 16.84 | 15  |
| PEBP1    | 5037   | Leukemia, MESH:D015473 | arsenite D   | 16.84 | 157 |
| PFKM     | 5213   | Leukemia, MESH:D015470 | Daunorub     | 16.84 | 40  |
| PPP2R3A  | 5523   | Leukemia, MESH:D015473 | Arsenic ar:  | 16.84 | 11  |
| SCNN1A   | 6337   | Leukemia, MESH:D015470 | Calcitriol C | 16.84 | 16  |
| SNX5     | 27131  | Leukemia, MESH:D015473 | Dexameth     | 16.84 | 156 |
| SRRM2    | 23524  | Leukemia, MESH:D015470 | Dexameth     | 16.84 | 11  |
| SUCLG2   | 8801   | Leukemia, MESH:D015470 | Arsenic Tr   | 16.84 | 23  |
| HAS1     | 3036   | Leukemia, MESH:D015473 | arsenite D   | 16.83 | 8   |
| IL15     | 3600   | Leukemia, MESH:D015473 | Arsenic Tr   | 16.83 | 261 |
| KLF6     | 1316   | Leukemia, MESH:D004915 | Doxorubic    | 16.83 | 3   |
| MATK     | 4145   | Leukemia, MESH:D015473 | Arsenic Ar   | 16.83 | 263 |
| RYR3     | 6263   | Leukemia, MESH:D015473 | Arsenic Ar   | 16.83 | 265 |
| SHH      | 6469   | Leukemia, MESH:D015473 | Arsenic Tr   | 16.83 | 261 |
| SOX13    | 9580   | Leukemia, MESH:D015473 | Arsenic Tr   | 16.83 | 261 |
| ZFYVE16  | 9765   | Leukemia, MESH:D015473 | arsenic dis  | 16.81 | 156 |
| HTATIP2  | 10553  | Leukemia, MESH:D015473 | Antimony     | 16.8  | 262 |
| RHOA     | 387    | Leukemia, MESH:D015473 | Arsenic Tr   | 16.8  | 261 |
| BPNT1    | 10380  | Leukemia, MESH:D015470 | Air Polluta  | 16.79 | 7   |
| C4ORF3   | 401152 | Leukemia, MESH:D015470 | Bortezomi    | 16.79 | 13  |
| COL12A1  | 1303   | Leukemia, MESH:D015473 | arsenite D   | 16.79 | 157 |
| GJA1     | 2697   | Leukemia, MESH:D007948 | 2-(2-amin    | 16.79 | 3   |
| GSTK1    | 373156 | Leukemia, MESH:D015473 | Arsenic ca   | 16.79 | 12  |
| IRAG1    | 10335  | Leukemia, MESH:D015470 | Calcitriol C | 16.79 | 8   |
| MIR125A  | 406910 | Leukemia, MESH:D015470 | Air Polluta  | 16.79 | 30  |
| MIR149   | 406941 | Leukemia, MESH:D015473 | Arsenic Ar   | 16.79 | 158 |
| NTRK1    | 4914   | Leukemia, MESH:D015473 | Arsenic Ar   | 16.79 | 263 |
| ROCK2    | 9475   | Leukemia, MESH:D015473 | Arsenic ar:  | 16.79 | 13  |
| SOHLH1   | 402381 | Leukemia, MESH:D015473 | Arsenic Etr  | 16.79 | 152 |
| APLN     | 8862   | Leukemia, MESH:D015470 | Dexameth     | 16.78 | 15  |
| ASXL1    | 171023 | Leukemia, MESH:D015470 | Benzene C    | 16.78 | 30  |
| CAB39L   | 81617  | Leukemia, MESH:D015473 | Arsenic Tr   | 16.78 | 165 |
| CCND1    | 595    | Leukemia, MESH:D007948 | 2-(2-amin    | 16.78 | 3   |
| CCNO     | 10309  | Leukemia, MESH:D015470 | Arsenic Tr   | 16.78 | 20  |
| CLASP2   | 23122  | Leukemia, MESH:D015470 | Doxorubic    | 16.78 | 17  |
| DYNC1LI2 | 1783   | Leukemia, MESH:D015473 | arsenite M   | 16.78 | 157 |
| GREM2    | 64388  | Leukemia, MESH:D015473 | Dasatinib    | 16.78 | 151 |

|          |        |                        |              |       |     |
|----------|--------|------------------------|--------------|-------|-----|
| INCENP   | 3619   | Leukemia, MESH:D015470 | Calcitriol E | 16.78 | 16  |
| MAB21L2  | 10586  | Leukemia, MESH:D015470 | Cytarabine   | 16.78 | 81  |
| MIA      | 8190   | Leukemia, MESH:D015470 | Decitabine   | 16.78 | 15  |
| MTFP1    | 51537  | Leukemia, MESH:D015470 | Doxorubic    | 16.78 | 13  |
| NDUFB10  | 4716   | Leukemia, MESH:D015470 | Doxorubic    | 16.78 | 12  |
| OLIG2    | 10215  | Leukemia, MESH:D015470 | Arsenic Tr   | 16.78 | 19  |
| PPP4R3B  | 57223  | Leukemia, MESH:D015470 | Doxorubic    | 16.78 | 15  |
| SNX25    | 83891  | Leukemia, MESH:D015470 | Calcitriol E | 16.78 | 16  |
| STK17A   | 9263   | Leukemia, MESH:D015473 | Arsenic Tr   | 16.78 | 259 |
| THSD7A   | 221981 | Leukemia, MESH:D015470 | Decitabine   | 16.78 | 14  |
| TRPM4    | 54795  | Leukemia, MESH:D015470 | Arsenic Tr   | 16.78 | 26  |
| TWIST2   | 117581 | Leukemia, MESH:D015470 | Benzene E    | 16.78 | 27  |
| ZNRF1    | 84937  | Leukemia, MESH:D015470 | Dexameth     | 16.78 | 8   |
| APOM     | 55937  | Leukemia, MESH:D015470 | Dexameth     | 16.77 | 11  |
| ATP6V1G1 | 9550   | Leukemia, MESH:D015470 | Arsenic Tr   | 16.77 | 18  |
| CAPRIN1  | 4076   | Leukemia, MESH:D015470 | Doxorubic    | 16.77 | 15  |
| CCDC69   | 26112  | Leukemia, MESH:D015470 | Dexameth     | 16.77 | 12  |
| CCDC77   | 84318  | Leukemia, MESH:D015470 | Dexameth     | 16.77 | 8   |
| CMTM7    | 112616 | Leukemia, MESH:D015470 | Doxorubic    | 16.77 | 13  |
| DIAPH1   | 1729   | Leukemia, MESH:D015470 | Arsenic Tr   | 16.77 | 13  |
| EID3     | 493861 | Leukemia, MESH:D015470 | Dexameth     | 16.77 | 8   |
| FYB2     | 199920 | Leukemia, MESH:D015470 | Cytarabine   | 16.77 | 76  |
| GFI1     | 2672   | Leukemia, MESH:D015473 | Arsenic De   | 16.77 | 154 |
| GSAP     | 54103  | Leukemia, MESH:D015470 | Doxorubic    | 16.77 | 13  |
| HLA-DMA  | 3108   | Leukemia, MESH:D015473 | Arsenic De   | 16.77 | 159 |
| KCNIP4   | 80333  | Leukemia, MESH:D015470 | Arsenic Tr   | 16.77 | 25  |
| MAPK11   | 5600   | Leukemia, MESH:D015470 | Arsenic Tr   | 16.77 | 18  |
| MICAL2   | 9645   | Leukemia, MESH:D015470 | Doxorubic    | 16.77 | 14  |
| MIR449A  | 554213 | Leukemia, MESH:D015470 | Dexameth     | 16.77 | 6   |
| MYOCD    | 93649  | Leukemia, MESH:D015473 | Arsenic Ar   | 16.77 | 159 |
| NLRP12   | 91662  | Leukemia, MESH:D015473 | Arsenic Ar   | 16.77 | 262 |
| RUFY3    | 22902  | Leukemia, MESH:D015470 | Doxorubic    | 16.77 | 13  |
| SLC16A7  | 9194   | Leukemia, MESH:D015470 | Doxorubic    | 16.77 | 15  |
| TFB2M    | 64216  | Leukemia, MESH:D015470 | Doxorubic    | 16.77 | 13  |
| TRIL     | 9865   | Leukemia, MESH:D015470 | Arsenic Tr   | 16.77 | 13  |
| TULP4    | 56995  | Leukemia, MESH:D015470 | Dexameth     | 16.77 | 11  |
| VCPIP1   | 80124  | Leukemia, MESH:D015470 | Arsenic Tr   | 16.77 | 13  |
| WDR62    | 284403 | Leukemia, MESH:D015470 | Calcitriol E | 16.77 | 12  |
| ZC3H12C  | 85463  | Leukemia, MESH:D015470 | Calcitriol E | 16.77 | 13  |
| ADH1B    | 125    | Leukemia, MESH:D015473 | Arsenic Tr   | 16.76 | 261 |
| ATP8B2   | 57198  | Leukemia, MESH:D015473 | arsenite G   | 16.76 | 156 |
| BPI      | 671    | Leukemia, MESH:D015470 | Arsenic Tr   | 16.76 | 12  |
| CENATAC  | 338657 | Leukemia, MESH:D015470 | Decitabine   | 16.76 | 13  |
| CPPED1   | 55313  | Leukemia, MESH:D015473 | arsenite D   | 16.76 | 154 |
| DOCK5    | 80005  | Leukemia, MESH:D015473 | Arsenic ar:  | 16.76 | 157 |
| ECPAS    | 23392  | Leukemia, MESH:D015473 | Arsenic Ar   | 16.76 | 265 |
| LDLR     | 3949   | Leukemia, MESH:D007948 | 2-(2-amin    | 16.76 | 2   |
| MTMR11   | 10903  | Leukemia, MESH:D015473 | Arsenic Ar   | 16.76 | 263 |
| NRARP    | 441478 | Leukemia, MESH:D015473 | arsenite Ci  | 16.76 | 155 |
| NUPL1    | 71844  | Leukemia, MESH:D015470 | (+)-JQ1 c    | 16.76 | 8   |
| PIN1     | 5300   | Leukemia, MESH:D015473 | Arsenic Tr   | 16.76 | 262 |
| PROSER1  | 80209  | Leukemia, MESH:D015470 | Doxorubic    | 16.76 | 12  |
| PWWP3A   | 84939  | Leukemia, MESH:D015473 | Arsenic Ar   | 16.76 | 263 |
| SNRPE    | 6635   | Leukemia, MESH:D015473 | Arsenic Tr   | 16.76 | 156 |
| TRANK1   | 9881   | Leukemia, MESH:D015473 | Arsenic ar:  | 16.76 | 157 |
| FAM50B   | 26240  | Leukemia, MESH:D015470 | Dexameth     | 16.75 | 6   |
| HSPA4    | 3308   | Leukemia, MESH:D015470 | Arsenic Tr   | 16.75 | 23  |
| INSIG2   | 51141  | Leukemia, MESH:D015473 | Arsenic Ca   | 16.75 | 156 |



|          |        |                        |              |       |     |
|----------|--------|------------------------|--------------|-------|-----|
| IQCH     | 64799  | Leukemia, MESH:D015470 | Arsenic Tr   | 16.75 | 12  |
| KCNS1    | 3787   | Leukemia, MESH:D015470 | Dexameth     | 16.75 | 8   |
| PRDM11   | 56981  | Leukemia, MESH:D015470 | Dexameth     | 16.75 | 12  |
| TDRD9    | 122402 | Leukemia, MESH:D015473 | Arsenic De   | 16.75 | 10  |
| TSPYL5   | 85453  | Leukemia, MESH:D015470 | Doxorubic    | 16.75 | 12  |
| ZNF385D  | 79750  | Leukemia, MESH:D015470 | Doxorubic    | 16.75 | 12  |
| ADRA1B   | 147    | Leukemia, MESH:D015473 | Arsenic ar:  | 16.74 | 158 |
| CABP5B   | 553766 | Leukemia, MESH:D015470 | Dexameth     | 16.74 | 4   |
| KRT27    | 342574 | Leukemia, MESH:D015473 | Arsenic Ar   | 16.74 | 158 |
| MGST3    | 4259   | Leukemia, MESH:D015473 | arsenite D   | 16.74 | 157 |
| ACP3     | 55     | Leukemia, MESH:D015473 | Arsenic Ge   | 16.73 | 153 |
| ATP7A    | 538    | Leukemia, MESH:D015473 | Buthionine   | 16.73 | 155 |
| ZNF516   | 9658   | Leukemia, MESH:D015473 | Arsenic Ar   | 16.73 | 158 |
| ABHD4    | 63874  | Leukemia, MESH:D015470 | Dasatinib    | 16.72 | 15  |
| ANKH     | 56172  | Leukemia, MESH:D015473 | Arsenic Ca   | 16.72 | 153 |
| EHF      | 26298  | Leukemia, MESH:D015473 | Antimony     | 16.72 | 7   |
| RAD51    | 5888   | Leukemia, MESH:D004915 | Cytarabine   | 16.72 | 2   |
| ADAM8    | 101    | Leukemia, MESH:D015470 | Calcitriol E | 16.71 | 16  |
| ALPP     | 250    | Leukemia, MESH:D015473 | Arsenic Tr   | 16.71 | 258 |
| AQP7     | 364    | Leukemia, MESH:D015470 | Dexameth     | 16.71 | 15  |
| ARHGAP1  | 9824   | Leukemia, MESH:D015470 | Calcitriol E | 16.71 | 14  |
| CPA4     | 51200  | Leukemia, MESH:D015473 | arsenite Ci  | 16.71 | 154 |
| EIF2S2   | 8894   | Leukemia, MESH:D015470 | Calcitriol E | 16.71 | 18  |
| ELAVL1   | 1994   | Leukemia, MESH:D015470 | Arsenic Tr   | 16.71 | 22  |
| ETFB     | 2109   | Leukemia, MESH:D015470 | Arsenic Tr   | 16.71 | 21  |
| GPC1     | 2817   | Leukemia, MESH:D015470 | Arsenic Tr   | 16.71 | 21  |
| GRP      | 2922   | Leukemia, MESH:D015473 | Arsenic Tr   | 16.71 | 156 |
| HSD3B1   | 3283   | Leukemia, MESH:D015473 | Calcitriol E | 16.71 | 156 |
| PARP14   | 54625  | Leukemia, MESH:D015470 | (+)-JQ1 c    | 16.71 | 10  |
| RNH1     | 6050   | Leukemia, MESH:D015473 | Antimony     | 16.71 | 154 |
| RRAD     | 6236   | Leukemia, MESH:D015473 | Calcitriol E | 16.71 | 154 |
| SLC35G1  | 159371 | Leukemia, MESH:D015473 | Arsenic Tr   | 16.71 | 260 |
| TCIRG1   | 10312  | Leukemia, MESH:D015473 | Arsenic so   | 16.71 | 159 |
| GP1B     | 246095 | Leukemia, MESH:D015470 | Alitreteinol | 16.7  | 7   |
| LHCGR    | 3973   | Leukemia, MESH:D015473 | arsenite D   | 16.7  | 157 |
| MBD4     | 8930   | Leukemia, MESH:D015473 | Arsenic Tr   | 16.7  | 262 |
| MCOLN2   | 255231 | Leukemia, MESH:D015473 | arsenite D   | 16.7  | 8   |
| PDLIM4   | 8572   | Leukemia, MESH:D015473 | arsenite C   | 16.7  | 157 |
| SCN3B    | 55800  | Leukemia, MESH:D015473 | Arsenic Etr  | 16.7  | 155 |
| SLC16A14 | 151473 | Leukemia, MESH:D015473 | Arsenic Ca   | 16.7  | 156 |
| SP100    | 6672   | Leukemia, MESH:D015473 | Arsenic De   | 16.7  | 157 |
| UBE2S    | 27338  | Leukemia, MESH:D015473 | Arsenic ar:  | 16.7  | 156 |
| ANKRD28  | 23243  | Leukemia, MESH:D015470 | Doxorubic    | 16.69 | 21  |
| BICD1    | 636    | Leukemia, MESH:D015470 | Azacitidine  | 16.69 | 10  |
| CAVIN4   | 347273 | Leukemia, MESH:D015473 | arsenite D   | 16.69 | 157 |
| CCNG1    | 900    | Leukemia, MESH:D004915 | Cytarabine   | 16.69 | 2   |
| DNAJB5   | 25822  | Leukemia, MESH:D015473 | Dexameth     | 16.69 | 153 |
| FBXL4    | 26235  | Leukemia, MESH:D015473 | Arsenic Tr   | 16.69 | 261 |
| GABRD    | 2563   | Leukemia, MESH:D015473 | arsenite D   | 16.69 | 153 |
| LSS      | 4047   | Leukemia, MESH:D015470 | Calcitriol E | 16.69 | 16  |
| MARK2    | 2011   | Leukemia, MESH:D015470 | Air Polluta  | 16.69 | 13  |
| SRD5A2A  | 550398 | Leukemia, MESH:D015470 | Alitreteinol | 16.69 | 7   |
| SRPK1    | 6732   | Leukemia, MESH:D015473 | arsenite Ci  | 16.69 | 157 |
| TMCC2    | 9911   | Leukemia, MESH:D015470 | Doxorubic    | 16.69 | 14  |
| ARHGAP9  | 64333  | Leukemia, MESH:D015470 | Arsenic Tr   | 16.68 | 23  |
| ARHGEF3  | 84904  | Leukemia, MESH:D015470 | Calcitriol I | 16.68 | 7   |
| ARL3     | 403    | Leukemia, MESH:D015470 | (+)-JQ1 c    | 16.68 | 10  |
| BLCAP    | 10904  | Leukemia, MESH:D015470 | Benzene E    | 16.68 | 33  |

|          |        |                        |              |       |     |
|----------|--------|------------------------|--------------|-------|-----|
| CBX2     | 84733  | Leukemia, MESH:D015470 | Calcitriol[M | 16.68 | 10  |
| DENND2C  | 79961  | Leukemia, MESH:D015470 | Air Polluta  | 16.68 | 10  |
| DNMT3L   | 29947  | Leukemia, MESH:D015470 | Arsenic Tr   | 16.68 | 15  |
| ESRP1    | 54845  | Leukemia, MESH:D015470 | Arsenic Tr   | 16.68 | 21  |
| ESYT2    | 57488  | Leukemia, MESH:D015470 | Bortezomi    | 16.68 | 13  |
| EXOC2    | 55770  | Leukemia, MESH:D015470 | Dexameth     | 16.68 | 12  |
| FCGBP    | 8857   | Leukemia, MESH:D015470 | Decitabine   | 16.68 | 15  |
| FRMD5    | 84978  | Leukemia, MESH:D015470 | Dexameth     | 16.68 | 14  |
| LCORL    | 254251 | Leukemia, MESH:D015470 | Arsenic Tr   | 16.68 | 22  |
| LLGL2    | 3993   | Leukemia, MESH:D015473 | Arsenic Tr   | 16.68 | 262 |
| LSM4     | 25804  | Leukemia, MESH:D015470 | Bortezomi    | 16.68 | 14  |
| NDUFA10  | 4705   | Leukemia, MESH:D015470 | Arsenic Tr   | 16.68 | 20  |
| PHTF1    | 10745  | Leukemia, MESH:D015470 | Bortezomi    | 16.68 | 10  |
| PRKX     | 5613   | Leukemia, MESH:D015473 | Daunorub     | 16.68 | 20  |
| PURB     | 5814   | Leukemia, MESH:D015470 | Benzene[C    | 16.68 | 27  |
| PXK      | 54899  | Leukemia, MESH:D015470 | Arsenic Tr   | 16.68 | 19  |
| RDH5     | 5959   | Leukemia, MESH:D015470 | Dexameth     | 16.68 | 8   |
| RHOD     | 29984  | Leukemia, MESH:D015470 | Arsenic Tr   | 16.68 | 19  |
| SCOC     | 60592  | Leukemia, MESH:D015470 | Calcitriol[C | 16.68 | 7   |
| SERPINB6 | 5269   | Leukemia, MESH:D015470 | Calcitriol[C | 16.68 | 81  |
| SETD4    | 54093  | Leukemia, MESH:D015470 | Dexameth     | 16.68 | 8   |
| SF3B3    | 23450  | Leukemia, MESH:D015470 | Air Polluta  | 16.68 | 15  |
| SPSB4    | 92369  | Leukemia, MESH:D015470 | Doxorubic    | 16.68 | 14  |
| SPTB     | 6710   | Leukemia, MESH:D015473 | Arsenic Tr   | 16.68 | 260 |
| STYXL1   | 51657  | Leukemia, MESH:D015470 | Doxorubic    | 16.68 | 15  |
| TMEM144  | 55314  | Leukemia, MESH:D015470 | Decitabine   | 16.68 | 19  |
| TMEM39A  | 55254  | Leukemia, MESH:D015470 | Air Polluta  | 16.68 | 25  |
| TRDMT1   | 1787   | Leukemia, MESH:D015470 | Decitabine   | 16.68 | 18  |
| VWA5A    | 4013   | Leukemia, MESH:D015470 | Arsenic Tr   | 16.68 | 16  |
| ZNF740B  | 767693 | Leukemia, MESH:D015473 | Dexameth     | 16.68 | 4   |
| AGO4     | 192670 | Leukemia, MESH:D015470 | Doxorubic    | 16.67 | 15  |
| CENPT    | 80152  | Leukemia, MESH:D015470 | Dexameth     | 16.67 | 8   |
| DDX18    | 8886   | Leukemia, MESH:D015473 | Resveratrc   | 16.67 | 159 |
| KDM4C    | 23081  | Leukemia, MESH:D015470 | Doxorubic    | 16.67 | 13  |
| NFASC    | 23114  | Leukemia, MESH:D015470 | Calcitriol[C | 16.67 | 13  |
| SRC      | 6714   | Leukemia, MESH:D007948 | 2-(2-amin    | 16.67 | 3   |
| UGCG     | 7357   | Leukemia, MESH:D015473 | Dexameth     | 16.67 | 158 |
| ANKRD36  | 400986 | Leukemia, MESH:D015470 | Cytarabine   | 16.66 | 72  |
| F2RL1    | 2150   | Leukemia, MESH:D015473 | Arsenic Tr   | 16.66 | 260 |
| FKBP4    | 2288   | Leukemia, MESH:D015473 | Dexameth     | 16.66 | 155 |
| HSPA1A   | 3303   | Leukemia, MESH:D007948 | Arsenic Tr   | 16.66 | 3   |
| RELA     | 5970   | Leukemia, MESH:D004915 | Cytarabine   | 16.66 | 3   |
| WNT4     | 54361  | Leukemia, MESH:D015473 | Arsenic[ars  | 16.66 | 158 |
| MIR337   | 442905 | Leukemia, MESH:D015473 | Arsenic[Bu   | 16.65 | 9   |
| NPY1R    | 4886   | Leukemia, MESH:D015470 | Dexameth     | 16.65 | 12  |
| PCBP1    | 5093   | Leukemia, MESH:D015473 | Arsenic Tr   | 16.65 | 156 |
| PDGFRB   | 5159   | Leukemia, MESH:D004915 | Cytarabine   | 16.65 | 3   |
| PIK3CG   | 5294   | Leukemia, MESH:D015470 | Arsenic Tr   | 16.65 | 23  |
| PLCB4    | 5332   | Leukemia, MESH:D015470 | Arsenic Tr   | 16.65 | 29  |
| PSMA4    | 5685   | Leukemia, MESH:D015470 | Air Polluta  | 16.65 | 26  |
| RAB30    | 27314  | Leukemia, MESH:D015470 | Air Polluta  | 16.65 | 16  |
| RPA1     | 6117   | Leukemia, MESH:D015470 | Cyclophos    | 16.65 | 19  |
| TSHR     | 7253   | Leukemia, MESH:D015470 | Azacitidine  | 16.65 | 12  |
| CHAF1B   | 8208   | Leukemia, MESH:D015470 | Calcitriol[C | 16.64 | 10  |
| ENPEP    | 2028   | Leukemia, MESH:D015470 | Dronabinc    | 16.64 | 11  |
| IQGAP2   | 10788  | Leukemia, MESH:D015470 | Indometha    | 16.64 | 14  |
| JMY      | 133746 | Leukemia, MESH:D015473 | arsenite[Ci  | 16.64 | 154 |
| PDLIM5B  | 393165 | Leukemia, MESH:D015473 | Dexameth     | 16.64 | 152 |

|          |        |                        |              |       |     |
|----------|--------|------------------------|--------------|-------|-----|
| PLLP     | 51090  | Leukemia, MESH:D015473 | Arsenic Tr   | 16.64 | 165 |
| RFLNB    | 359845 | Leukemia, MESH:D015473 | Calcitriol C | 16.64 | 153 |
| RPL26    | 6154   | Leukemia, MESH:D015473 | Arsenic Tr   | 16.64 | 157 |
| SLC38A4  | 55089  | Leukemia, MESH:D015470 | (+)-JQ1 α    | 16.64 | 11  |
| TAGLN    | 6876   | Leukemia, MESH:D004915 | Cytarabine   | 16.64 | 3   |
| TRIM13   | 10206  | Leukemia, MESH:D015473 | Calcitriol C | 16.64 | 7   |
| YWHAZ    | 7534   | Leukemia, MESH:D015473 | Arsenic Tr   | 16.64 | 266 |
| CELSR1   | 9620   | Leukemia, MESH:D015473 | Arsenic Tr   | 16.63 | 261 |
| CPZ      | 8532   | Leukemia, MESH:D015473 | Calcitriol C | 16.63 | 156 |
| CYP11A1  | 1583   | Leukemia, MESH:D007948 | Arsenic Tr   | 16.63 | 3   |
| EXOC3    | 11336  | Leukemia, MESH:D015473 | Arsenic De   | 16.63 | 159 |
| LILRB1   | 10859  | Leukemia, MESH:D015473 | Arsenic Ar   | 16.63 | 158 |
| ND4      | 4538   | Leukemia, MESH:D015473 | Arsenic Ar   | 16.63 | 160 |
| NOD2     | 64127  | Leukemia, MESH:D015473 | Arsenic Ca   | 16.63 | 9   |
| PHACTR2  | 9749   | Leukemia, MESH:D015473 | arsenite C   | 16.63 | 156 |
| POM121L  | 29797  | Leukemia, MESH:D015470 | Dexameth     | 16.63 | 7   |
| VPS13A   | 23230  | Leukemia, MESH:D015473 | arsenite C   | 16.63 | 8   |
| ATP5MC1  | 516    | Leukemia, MESH:D015473 | Arsenic ar   | 16.62 | 12  |
| B3GALT5- | 114041 | Leukemia, MESH:D015470 | Dexameth     | 16.62 | 5   |
| KRBOX5   | 124411 | Leukemia, MESH:D015470 | Arsenic Tr   | 16.62 | 12  |
| NIFK     | 84365  | Leukemia, MESH:D015473 | Arsenic Tr   | 16.62 | 262 |
| PDCD2    | 5134   | Leukemia, MESH:D007948 | Arsenic Tr   | 16.62 | 3   |
| SIT1     | 27240  | Leukemia, MESH:D015470 | Air Polluta  | 16.62 | 6   |
| SLC7A14  | 57709  | Leukemia, MESH:D015470 | Arsenic Tr   | 16.62 | 22  |
| TMEM117  | 84216  | Leukemia, MESH:D015473 | Calcitriol C | 16.62 | 155 |
| TMEM45A  | 55076  | Leukemia, MESH:D015473 | Arsenic Cy   | 16.62 | 158 |
| USP1     | 7398   | Leukemia, MESH:D015473 | arsenite C   | 16.62 | 157 |
| ZNF282   | 8427   | Leukemia, MESH:D015473 | Cytarabine   | 16.62 | 153 |
| ACCSL    | 390110 | Leukemia, MESH:D015470 | Dexameth     | 16.61 | 6   |
| ATMIN    | 23300  | Leukemia, MESH:D004915 | Doxorubic    | 16.61 | 2   |
| DMWD     | 1762   | Leukemia, MESH:D015470 | Dronabinc    | 16.61 | 7   |
| ELMO1    | 9844   | Leukemia, MESH:D015473 | Arsenic Tr   | 16.61 | 262 |
| KRT8     | 3856   | Leukemia, MESH:D004915 | Cytarabine   | 16.61 | 2   |
| MAP1LC3l | 81631  | Leukemia, MESH:D007948 | 2-(2-amin    | 16.61 | 3   |
| RPL36A   | 6173   | Leukemia, MESH:D015473 | Arsenic Tr   | 16.61 | 262 |
| SLC10A1  | 6554   | Leukemia, MESH:D015470 | Allopurinc   | 16.61 | 15  |
| SLC18A2  | 6571   | Leukemia, MESH:D015470 | Air Polluta  | 16.61 | 11  |
| SLC2A1   | 6513   | Leukemia, MESH:D007948 | 2-(2-amin    | 16.61 | 4   |
| SMPDL3B  | 27293  | Leukemia, MESH:D015473 | Arsenic ar   | 16.61 | 157 |
| BNIP1    | 149428 | Leukemia, MESH:D015470 | Dronabinc    | 16.6  | 6   |
| BORCS7   | 119032 | Leukemia, MESH:D015470 | Doxorubic    | 16.6  | 15  |
| FGF19    | 9965   | Leukemia, MESH:D015470 | Dasatinib    | 16.6  | 10  |
| MIR455   | 619556 | Leukemia, MESH:D015470 | Benzene C    | 16.6  | 26  |
| RFWD3    | 55159  | Leukemia, MESH:D015470 | Calcitriol C | 16.6  | 16  |
| ARL8B    | 55207  | Leukemia, MESH:D015470 | Arsenic Tr   | 16.59 | 20  |
| BCAP29   | 55973  | Leukemia, MESH:D015470 | Calcitriol C | 16.59 | 13  |
| CALCOCC  | 57658  | Leukemia, MESH:D015470 | Dasatinib    | 16.59 | 9   |
| CCDC66   | 285331 | Leukemia, MESH:D015470 | Doxorubic    | 16.59 | 11  |
| CLPTM1   | 1209   | Leukemia, MESH:D015470 | Bortezomi    | 16.59 | 14  |
| COMMD2   | 51122  | Leukemia, MESH:D015470 | Dexameth     | 16.59 | 12  |
| CRBN     | 51185  | Leukemia, MESH:D015470 | Arsenic Tr   | 16.59 | 19  |
| CSMD2    | 114784 | Leukemia, MESH:D015470 | Calcitriol C | 16.59 | 11  |
| CSNK1G1  | 53944  | Leukemia, MESH:D015470 | Decitabine   | 16.59 | 18  |
| DENND4A  | 10260  | Leukemia, MESH:D015470 | Bortezomi    | 16.59 | 13  |
| DMTF1    | 9988   | Leukemia, MESH:D015470 | Benzene C    | 16.59 | 22  |
| EMC10    | 284361 | Leukemia, MESH:D015470 | Doxorubic    | 16.59 | 13  |
| KERA     | 11081  | Leukemia, MESH:D015470 | Dexameth     | 16.59 | 6   |
| LHX1     | 3975   | Leukemia, MESH:D015470 | Calcitriol E | 16.59 | 18  |

|         |        |                        |              |       |     |
|---------|--------|------------------------|--------------|-------|-----|
| MFF     | 56947  | Leukemia, MESH:D015470 | Deferoxan    | 16.59 | 12  |
| NEK2    | 4751   | Leukemia, MESH:D015473 | arsenite[Ci  | 16.59 | 157 |
| PADI4   | 23569  | Leukemia, MESH:D015470 | Alitretinoi  | 16.59 | 13  |
| PHF6    | 84295  | Leukemia, MESH:D015470 | Methotrex    | 16.59 | 12  |
| PUF60   | 22827  | Leukemia, MESH:D015470 | Air Polluta  | 16.59 | 20  |
| RPL23A  | 6147   | Leukemia, MESH:D015470 | Dexameth     | 16.59 | 9   |
| S100A3  | 6274   | Leukemia, MESH:D015470 | Calcitriol[C | 16.59 | 13  |
| SEC14L1 | 6397   | Leukemia, MESH:D015470 | Calcitriol[C | 16.59 | 80  |
| SGCB    | 6443   | Leukemia, MESH:D015470 | Dronabinc    | 16.59 | 10  |
| SH3YL1  | 26751  | Leukemia, MESH:D015470 | Calcitriol[C | 16.59 | 16  |
| SOAT1   | 6646   | Leukemia, MESH:D015470 | Air Polluta  | 16.59 | 11  |
| UPF2    | 26019  | Leukemia, MESH:D015470 | Arsenic Tr   | 16.59 | 19  |
| USP24   | 23358  | Leukemia, MESH:D015470 | Dexameth     | 16.59 | 8   |
| UVSSA   | 57654  | Leukemia, MESH:D015470 | Dexameth     | 16.59 | 8   |
| ZBED6   | 1E+08  | Leukemia, MESH:D015470 | Dronabinc    | 16.59 | 6   |
| ZNF33B  | 7582   | Leukemia, MESH:D015470 | Arsenic Tr   | 16.59 | 15  |
| ACOX2   | 8309   | Leukemia, MESH:D015470 | Calcitriol[C | 16.58 | 20  |
| ALDH9A1 | 223    | Leukemia, MESH:D015470 | Doxorubic    | 16.58 | 15  |
| C1QBP   | 708    | Leukemia, MESH:D015470 | Dexameth     | 16.58 | 24  |
| CASQ2   | 845    | Leukemia, MESH:D015470 | Dexameth     | 16.58 | 21  |
| CCT3    | 7203   | Leukemia, MESH:D015470 | Arsenic Tr   | 16.58 | 19  |
| DKC1    | 1736   | Leukemia, MESH:D015470 | Dexameth     | 16.58 | 10  |
| DNAH1   | 25981  | Leukemia, MESH:D015470 | Dexameth     | 16.58 | 7   |
| DUSP9   | 1852   | Leukemia, MESH:D015470 | Dexameth     | 16.58 | 8   |
| ENY2    | 56943  | Leukemia, MESH:D015470 | Dexameth     | 16.58 | 13  |
| ERBIN   | 55914  | Leukemia, MESH:D015470 | Doxorubic    | 16.58 | 13  |
| ESCO2   | 157570 | Leukemia, MESH:D015470 | Calcitriol[C | 16.58 | 17  |
| FBXO44  | 93611  | Leukemia, MESH:D015470 | Doxorubic    | 16.58 | 11  |
| HECA    | 51696  | Leukemia, MESH:D015470 | Arsenic Tr   | 16.58 | 14  |
| HNF1A   | 6927   | Leukemia, MESH:D015470 | Azaciditine  | 16.58 | 18  |
| IFT122  | 55764  | Leukemia, MESH:D015470 | Doxorubic    | 16.58 | 14  |
| INPP5D  | 3635   | Leukemia, MESH:D015470 | Decitabine   | 16.58 | 15  |
| LRRC8B  | 23507  | Leukemia, MESH:D015470 | Arsenic Tr   | 16.58 | 18  |
| MIS18A  | 54069  | Leukemia, MESH:D015473 | arsenite[Ci  | 16.58 | 7   |
| NSL1    | 25936  | Leukemia, MESH:D015470 | Arsenic Tr   | 16.58 | 19  |
| PAQR8   | 85315  | Leukemia, MESH:D015470 | Air Polluta  | 16.58 | 8   |
| PDZRN4  | 29951  | Leukemia, MESH:D015470 | Arsenic Tr   | 16.58 | 12  |
| PFN1    | 5216   | Leukemia, MESH:D015470 | Azaciditine  | 16.58 | 15  |
| RALBP1  | 10928  | Leukemia, MESH:D015470 | Arsenic Tr   | 16.58 | 19  |
| RBM20   | 282996 | Leukemia, MESH:D015470 | Doxorubic    | 16.58 | 14  |
| RPL3    | 6122   | Leukemia, MESH:D015470 | Arsenic Tr   | 16.58 | 23  |
| SCG3    | 29106  | Leukemia, MESH:D015470 | Cyclophos    | 16.58 | 8   |
| SLC32A1 | 140679 | Leukemia, MESH:D015470 | Dexameth     | 16.58 | 8   |
| SLCO4A1 | 28231  | Leukemia, MESH:D015470 | Dexameth     | 16.58 | 19  |
| SOCS1   | 8651   | Leukemia, MESH:D015473 | Arsenic Tr   | 16.58 | 263 |
| TRARG1  | 286753 | Leukemia, MESH:D015470 | Dexameth     | 16.58 | 7   |
| UGT1A6  | 54578  | Leukemia, MESH:D015473 | Antimony     | 16.58 | 161 |
| VASH1   | 22846  | Leukemia, MESH:D015470 | Arsenic Tr   | 16.58 | 20  |
| VGLL3   | 389136 | Leukemia, MESH:D015470 | Dexameth     | 16.58 | 8   |
| ZNF654  | 55279  | Leukemia, MESH:D015470 | Doxorubic    | 16.58 | 12  |
| FGF5    | 2250   | Leukemia, MESH:D015473 | Arsenic[ars  | 16.57 | 11  |
| NPHS2   | 7827   | Leukemia, MESH:D015473 | Arsenic Tr   | 16.57 | 259 |
| SMS     | 6611   | Leukemia, MESH:D015473 | Arsenic Tr   | 16.57 | 155 |
| SOSTDC1 | 25928  | Leukemia, MESH:D015473 | Arsenic Tr   | 16.57 | 260 |
| H3F4    | 382523 | Leukemia, MESH:D015473 | Arsenic Tr   | 16.56 | 262 |
| KCNE3   | 10008  | Leukemia, MESH:D015473 | Arsenic[Etr  | 16.56 | 155 |
| OSR1    | 130497 | Leukemia, MESH:D015473 | Arsenic[Cy   | 16.56 | 19  |
| PRKACA  | 5566   | Leukemia, MESH:D015470 | Dexameth     | 16.56 | 15  |

|          |        |                        |              |       |     |
|----------|--------|------------------------|--------------|-------|-----|
| RFFL     | 117584 | Leukemia, MESH:D015473 | Calcitriol[C | 16.56 | 6   |
| SLC38A5  | 92745  | Leukemia, MESH:D015473 | arsenite[D   | 16.56 | 154 |
| TCF7L1   | 83439  | Leukemia, MESH:D015473 | Arsenic Tr   | 16.56 | 155 |
| ZNF605   | 1E+08  | Leukemia, MESH:D015473 | Arsenic[ar:  | 16.56 | 156 |
| GNAI2    | 2771   | Leukemia, MESH:D015473 | alpha-Toc    | 16.55 | 155 |
| KCNS3    | 3790   | Leukemia, MESH:D015473 | Arsenic Tr   | 16.55 | 261 |
| MLF1     | 4291   | Leukemia, MESH:D015473 | Calcitriol[C | 16.55 | 154 |
| MSRB3    | 253827 | Leukemia, MESH:D015473 | Arsenic[Ar   | 16.55 | 264 |
| MYO5C    | 55930  | Leukemia, MESH:D015473 | Arsenic[Ar   | 16.55 | 263 |
| POU3F1   | 5453   | Leukemia, MESH:D015473 | arsenite[Ci  | 16.55 | 155 |
| H1-0     | 3005   | Leukemia, MESH:D015473 | Arsenic Tr   | 16.54 | 260 |
| PAX6     | 5080   | Leukemia, MESH:D015473 | Arsenic[ar:  | 16.54 | 160 |
| PCSK9    | 255738 | Leukemia, MESH:D015473 | Arsenic Tr   | 16.54 | 261 |
| PIGH     | 5283   | Leukemia, MESH:D004915 | Cytarabine   | 16.54 | 3   |
| SMG6     | 23293  | Leukemia, MESH:D004915 | Doxorubic    | 16.54 | 2   |
| ARRDC4   | 91947  | Leukemia, MESH:D015470 | Calcitriol[C | 16.52 | 13  |
| ATP2A1   | 487    | Leukemia, MESH:D015470 | Bortezomi    | 16.52 | 15  |
| BMPR2    | 659    | Leukemia, MESH:D015470 | Arsenic Tr   | 16.52 | 17  |
| CFLAR    | 8837   | Leukemia, MESH:D004915 | Doxorubic    | 16.52 | 3   |
| CREG1    | 8804   | Leukemia, MESH:D015470 | Doxorubic    | 16.52 | 14  |
| EPHX2    | 2053   | Leukemia, MESH:D015473 | Arsenic Tr   | 16.52 | 263 |
| GNAQ     | 2776   | Leukemia, MESH:D015470 | Air Polluta  | 16.52 | 10  |
| LIPA     | 3988   | Leukemia, MESH:D015470 | Dexameth     | 16.52 | 25  |
| PLA2G1B  | 5319   | Leukemia, MESH:D007948 | 2-(2-amin    | 16.52 | 2   |
| PTPRK    | 5796   | Leukemia, MESH:D015470 | Decitabine   | 16.52 | 19  |
| UQCRC2   | 7385   | Leukemia, MESH:D015470 | Arsenic Tr   | 16.52 | 21  |
| YWHAG    | 7532   | Leukemia, MESH:D015470 | Arsenic Tr   | 16.52 | 17  |
| CCNF     | 899    | Leukemia, MESH:D015473 | Arsenic Tr   | 16.51 | 266 |
| INS2     | 16334  | Leukemia, MESH:D015470 | Arsenic Tr   | 16.51 | 17  |
| MARCHF3  | 115123 | Leukemia, MESH:D015470 | Arsenic Tr   | 16.51 | 80  |
| MAT2A    | 4144   | Leukemia, MESH:D015473 | Arsenic[De   | 16.51 | 160 |
| MYL7     | 58498  | Leukemia, MESH:D015473 | Calcitriol[C | 16.51 | 155 |
| PFKFB3   | 5209   | Leukemia, MESH:D015470 | Air Polluta  | 16.51 | 19  |
| SLC12A1  | 6557   | Leukemia, MESH:D015470 | Chloroqui    | 16.51 | 9   |
| ACSS2    | 55902  | Leukemia, MESH:D015473 | Arsenic[Ar   | 16.5  | 263 |
| CD84     | 8832   | Leukemia, MESH:D015470 | Arsenic Tr   | 16.5  | 15  |
| CEP128   | 145508 | Leukemia, MESH:D015470 | Calcitriol[C | 16.5  | 10  |
| COL6A1   | 1291   | Leukemia, MESH:D015473 | Dexameth     | 16.5  | 155 |
| CYP2B10  | 13088  | Leukemia, MESH:D015473 | alpha-Toc    | 16.5  | 159 |
| FCMR     | 9214   | Leukemia, MESH:D015470 | Doxorubic    | 16.5  | 12  |
| MIR30A   | 407029 | Leukemia, MESH:D015470 | Air Polluta  | 16.5  | 16  |
| MRPL4    | 51073  | Leukemia, MESH:D015470 | Gasoline[I   | 16.5  | 13  |
| NCS1     | 23413  | Leukemia, MESH:D015470 | Benzoates    | 16.5  | 20  |
| REC8     | 9985   | Leukemia, MESH:D015470 | Decitabine   | 16.5  | 18  |
| TUBB4B   | 10383  | Leukemia, MESH:D015473 | Arsenic[ar:  | 16.5  | 160 |
| AIF1L    | 83543  | Leukemia, MESH:D015473 | Cytarabine   | 16.49 | 158 |
| ARHGAP1  | 55843  | Leukemia, MESH:D015470 | (+)-JQ1 α    | 16.49 | 11  |
| BPNT2    | 54928  | Leukemia, MESH:D015470 | Cytarabine   | 16.49 | 80  |
| CCDC88C  | 440193 | Leukemia, MESH:D015470 | Calcitriol[C | 16.49 | 8   |
| CCL26    | 10344  | Leukemia, MESH:D015470 | Dexameth     | 16.49 | 9   |
| CENPQ    | 55166  | Leukemia, MESH:D015470 | Calcitriol[( | 16.49 | 10  |
| CERS4    | 79603  | Leukemia, MESH:D015470 | Arsenic Tr   | 16.49 | 20  |
| CLEC4D   | 338339 | Leukemia, MESH:D015470 | Doxorubic    | 16.49 | 16  |
| DVL1     | 1855   | Leukemia, MESH:D015470 | Decitabine   | 16.49 | 19  |
| ETNK2    | 55224  | Leukemia, MESH:D015470 | Calcitriol[C | 16.49 | 14  |
| FAM189A: | 9413   | Leukemia, MESH:D015470 | Calcitriol[C | 16.49 | 12  |
| HOOK2    | 29911  | Leukemia, MESH:D015470 | Arsenic Tr   | 16.49 | 19  |
| IGDCC4   | 57722  | Leukemia, MESH:D015470 | Dexameth     | 16.49 | 16  |

|          |        |                        |              |       |     |
|----------|--------|------------------------|--------------|-------|-----|
| ING1     | 3621   | Leukemia, MESH:D015470 | Decitabine   | 16.49 | 14  |
| MUCL1    | 118430 | Leukemia, MESH:D015473 | Arsenic De   | 16.49 | 8   |
| NIT2     | 56954  | Leukemia, MESH:D015470 | Dexameth     | 16.49 | 20  |
| NLGN1    | 22871  | Leukemia, MESH:D015470 | Arsenic Tr   | 16.49 | 18  |
| PANX2    | 56666  | Leukemia, MESH:D015470 | Arsenic Tr   | 16.49 | 14  |
| PCLO     | 27445  | Leukemia, MESH:D015470 | Alitretinoi  | 16.49 | 12  |
| PDSS1    | 23590  | Leukemia, MESH:D015470 | Calcitriol C | 16.49 | 14  |
| PLEKHH2  | 130271 | Leukemia, MESH:D015470 | Dasatinib I  | 16.49 | 13  |
| PLEKHO1  | 51177  | Leukemia, MESH:D015470 | Arsenic Tr   | 16.49 | 18  |
| RDM1     | 201299 | Leukemia, MESH:D015470 | Calcitriol C | 16.49 | 14  |
| RNF6     | 6049   | Leukemia, MESH:D015470 | Arsenic Tr   | 16.49 | 21  |
| SCAPER   | 49855  | Leukemia, MESH:D015470 | Calcitriol C | 16.49 | 13  |
| SURF1    | 6834   | Leukemia, MESH:D015470 | Dexameth     | 16.49 | 14  |
| TMEM163  | 81615  | Leukemia, MESH:D015470 | Arsenic Tr   | 16.49 | 16  |
| USP25    | 29761  | Leukemia, MESH:D015473 | arsenite G   | 16.49 | 155 |
| ADD2     | 119    | Leukemia, MESH:D015470 | Dexameth     | 16.48 | 12  |
| ATG10    | 83734  | Leukemia, MESH:D015473 | Arsenic ars  | 16.48 | 11  |
| B4GALT6  | 9331   | Leukemia, MESH:D015473 | Calcitriol C | 16.48 | 154 |
| EPHB6    | 2051   | Leukemia, MESH:D015473 | Arsenic ars  | 16.48 | 156 |
| GDF15    | 9518   | Leukemia, MESH:D007948 | 2-(2-amin    | 16.48 | 3   |
| H4C8     | 8365   | Leukemia, MESH:D015473 | Arsenic Tr   | 16.48 | 261 |
| PCGF5    | 84333  | Leukemia, MESH:D015470 | Doxorubic    | 16.48 | 13  |
| PDZRN3   | 23024  | Leukemia, MESH:D015473 | arsenite Ci  | 16.48 | 155 |
| TNFRSF17 | 608    | Leukemia, MESH:D015470 | Air Polluta  | 16.48 | 16  |
| ACOT1    | 641371 | Leukemia, MESH:D015470 | Benzene C    | 16.47 | 26  |
| AGPAT4   | 56895  | Leukemia, MESH:D015473 | Arsenic Tr   | 16.47 | 261 |
| CSPP1    | 79848  | Leukemia, MESH:D015473 | Arsenic Tr   | 16.47 | 260 |
| EMG1     | 10436  | Leukemia, MESH:D015473 | arsenite D   | 16.47 | 155 |
| EMSY     | 56946  | Leukemia, MESH:D004915 | Doxorubic    | 16.47 | 2   |
| MLPH     | 79083  | Leukemia, MESH:D015473 | arsenite D   | 16.47 | 155 |
| MPO      | 4353   | Leukemia, MESH:D004915 | Doxorubic    | 16.47 | 4   |
| NAT2     | 10     | Leukemia, MESH:D015470 | Benzene C    | 16.47 | 26  |
| RAB38    | 23682  | Leukemia, MESH:D015473 | Dexameth     | 16.47 | 155 |
| SMYD3    | 64754  | Leukemia, MESH:D015473 | Arsenic Ar   | 16.47 | 263 |
| SNRPF    | 6636   | Leukemia, MESH:D015473 | Arsenic Tr   | 16.47 | 262 |
| SOX5     | 6660   | Leukemia, MESH:D015473 | arsenite D   | 16.47 | 155 |
| ALDH18A: | 5832   | Leukemia, MESH:D015470 | Bortezomi    | 16.46 | 12  |
| CCT5     | 22948  | Leukemia, MESH:D015470 | Air Polluta  | 16.46 | 14  |
| CTNNAL1  | 8727   | Leukemia, MESH:D015470 | Arsenic Tr   | 16.46 | 19  |
| CYB5R2   | 51700  | Leukemia, MESH:D007948 | Arsenic Tr   | 16.46 | 4   |
| H4C4     | 8360   | Leukemia, MESH:D015470 | Doxorubic    | 16.46 | 11  |
| HMCN2    | 256158 | Leukemia, MESH:D015470 | Doxorubic    | 16.46 | 12  |
| HMOX1A   | 791518 | Leukemia, MESH:D015470 | Arsenic Tr   | 16.46 | 16  |
| PPP1R10  | 5514   | Leukemia, MESH:D015470 | Air Polluta  | 16.46 | 32  |
| SCAMP5   | 192683 | Leukemia, MESH:D007948 | Arsenic Tr   | 16.46 | 4   |
| SGMS1    | 259230 | Leukemia, MESH:D015470 | Bortezomi    | 16.46 | 15  |
| USP2     | 9099   | Leukemia, MESH:D015473 | arsenite D   | 16.46 | 157 |
| LMO7     | 4008   | Leukemia, MESH:D015470 | Doxorubic    | 16.45 | 14  |
| OLFM1    | 10439  | Leukemia, MESH:D015470 | Doxorubic    | 16.45 | 17  |
| RPL10A   | 4736   | Leukemia, MESH:D015470 | Arsenic Tr   | 16.45 | 14  |
| ANKRD49  | 54851  | Leukemia, MESH:D015470 | Dexameth     | 16.44 | 11  |
| C14ORF13 | 56967  | Leukemia, MESH:D015470 | Bortezomi    | 16.44 | 12  |
| CDNF     | 441549 | Leukemia, MESH:D015470 | Arsenic Tr   | 16.44 | 12  |
| COL2A1   | 1280   | Leukemia, MESH:D015473 | arsenite D   | 16.44 | 157 |
| GMEB2    | 26205  | Leukemia, MESH:D015470 | Benzene C    | 16.44 | 25  |
| H2-DMA   | 14998  | Leukemia, MESH:D015470 | Dexameth     | 16.44 | 12  |
| POLR3GL  | 84265  | Leukemia, MESH:D015470 | Decitabine   | 16.44 | 12  |
| RPS9     | 6203   | Leukemia, MESH:D015473 | Arsenic Tr   | 16.44 | 156 |

|          |        |                        |              |       |     |
|----------|--------|------------------------|--------------|-------|-----|
| WDR82    | 80335  | Leukemia, MESH:D015470 | Arsenic Tr   | 16.44 | 12  |
| AOPEP    | 84909  | Leukemia, MESH:D015473 | Arsenic Ar   | 16.43 | 263 |
| ASB6     | 140459 | Leukemia, MESH:D015470 | Doxorubic    | 16.43 | 13  |
| CEACAM5  | 1048   | Leukemia, MESH:D015470 | (+)-JQ1 c    | 16.43 | 9   |
| DHRX     | 207063 | Leukemia, MESH:D015470 | Arsenic Tr   | 16.43 | 18  |
| KLHL24   | 54800  | Leukemia, MESH:D015473 | Arsenic Tr   | 16.43 | 262 |
| KREMEN2  | 79412  | Leukemia, MESH:D015470 | Dronabinc    | 16.43 | 7   |
| LIMS1    | 3987   | Leukemia, MESH:D015473 | arsenite Ci  | 16.43 | 154 |
| MAO      | 404730 | Leukemia, MESH:D015470 | Dexameth     | 16.43 | 7   |
| NEPRO    | 25871  | Leukemia, MESH:D015470 | Dexameth     | 16.43 | 13  |
| NMB      | 4828   | Leukemia, MESH:D015473 | arsenite D   | 16.43 | 152 |
| ODAD2    | 55130  | Leukemia, MESH:D015470 | (+)-JQ1 c    | 16.43 | 7   |
| PPP1R3E  | 90673  | Leukemia, MESH:D015470 | Doxorubic    | 16.43 | 14  |
| THAP3    | 90326  | Leukemia, MESH:D015470 | Dexameth     | 16.43 | 6   |
| TRIM66   | 9866   | Leukemia, MESH:D015470 | Dexameth     | 16.43 | 6   |
| USP30    | 84749  | Leukemia, MESH:D015470 | Doxorubic    | 16.43 | 11  |
| ZNF44    | 51710  | Leukemia, MESH:D015470 | Methotrex    | 16.43 | 9   |
| ZNF562   | 54811  | Leukemia, MESH:D015470 | Dexameth     | 16.43 | 10  |
| ZNF682   | 91120  | Leukemia, MESH:D015470 | Arsenic Tr   | 16.43 | 13  |
| ARHGEF6  | 9459   | Leukemia, MESH:D015473 | arsenite Ci  | 16.42 | 155 |
| C9ORF40  | 55071  | Leukemia, MESH:D015473 | Calcitriol F | 16.42 | 155 |
| MIEN1    | 84299  | Leukemia, MESH:D015470 | Dexameth     | 16.42 | 11  |
| NPPC     | 4880   | Leukemia, MESH:D015473 | arsenite Ci  | 16.42 | 7   |
| RPS19BP1 | 91582  | Leukemia, MESH:D015470 | Dexameth     | 16.42 | 12  |
| SIGMAR1  | 10280  | Leukemia, MESH:D015473 | arsenite D   | 16.42 | 157 |
| TMEM176  | 28959  | Leukemia, MESH:D015473 | Calcitriol C | 16.42 | 153 |
| ZNF507   | 22847  | Leukemia, MESH:D015470 | Doxorubic    | 16.42 | 13  |
| ABCF2    | 10061  | Leukemia, MESH:D015473 | Arsenic M    | 16.41 | 157 |
| ADAM22   | 53616  | Leukemia, MESH:D015473 | Calcitriol E | 16.41 | 153 |
| ANKRA2   | 57763  | Leukemia, MESH:D015470 | Ifosfamide   | 16.41 | 12  |
| AP2A1    | 160    | Leukemia, MESH:D015470 | Bortezomi    | 16.41 | 9   |
| CENPJ    | 55835  | Leukemia, MESH:D015473 | Calcitriol E | 16.41 | 154 |
| CPEB3    | 22849  | Leukemia, MESH:D015473 | Arsenic ar:  | 16.41 | 11  |
| DGCR8    | 54487  | Leukemia, MESH:D015470 | Arsenic Tr   | 16.41 | 17  |
| DROSHA   | 29102  | Leukemia, MESH:D015470 | Clioquinol   | 16.41 | 14  |
| ERCC3    | 2071   | Leukemia, MESH:D015470 | Benzene E    | 16.41 | 30  |
| GPX3     | 2878   | Leukemia, MESH:D004915 | Doxorubic    | 16.41 | 3   |
| KIAA0232 | 9778   | Leukemia, MESH:D015473 | Arsenic ar:  | 16.41 | 155 |
| PCP4     | 5121   | Leukemia, MESH:D015473 | arsenite D   | 16.41 | 8   |
| PIM2     | 11040  | Leukemia, MESH:D015473 | Dexameth     | 16.41 | 154 |
| SCLY     | 51540  | Leukemia, MESH:D015473 | Arsenic Tr   | 16.41 | 261 |
| SPAG1    | 6674   | Leukemia, MESH:D015473 | arsenite Ci  | 16.41 | 157 |
| SRPRB    | 58477  | Leukemia, MESH:D015473 | Dexameth     | 16.41 | 155 |
| STAG1    | 10274  | Leukemia, MESH:D015470 | Decitabine   | 16.41 | 16  |
| VPS37B   | 79720  | Leukemia, MESH:D015470 | Arsenic Tr   | 16.41 | 14  |
| VSTM2A   | 222008 | Leukemia, MESH:D015473 | Arsenic De   | 16.41 | 154 |
| ANKRD33  | 651746 | Leukemia, MESH:D015470 | Dexameth     | 16.4  | 17  |
| ATP5B    | 11947  | Leukemia, MESH:D015470 | Dexameth     | 16.4  | 22  |
| BLZF1    | 8548   | Leukemia, MESH:D015470 | Arsenic Tr   | 16.4  | 13  |
| CD37     | 951    | Leukemia, MESH:D015470 | Alitretinoi  | 16.4  | 10  |
| DTWD1    | 56986  | Leukemia, MESH:D015470 | Calcitriol E | 16.4  | 8   |
| EIF3D    | 8664   | Leukemia, MESH:D015470 | Doxorubic    | 16.4  | 13  |
| GABRE    | 2564   | Leukemia, MESH:D015470 | Arsenic Tr   | 16.4  | 13  |
| GBP6     | 163351 | Leukemia, MESH:D015470 | Dexameth     | 16.4  | 14  |
| GMPR     | 2766   | Leukemia, MESH:D015473 | Arsenic De   | 16.4  | 156 |
| GRIK3    | 2899   | Leukemia, MESH:D015470 | Arsenic Tr   | 16.4  | 16  |
| HSF2     | 3298   | Leukemia, MESH:D015470 | Arsenic Tr   | 16.4  | 20  |
| KAT5     | 10524  | Leukemia, MESH:D015470 | Arsenic Tr   | 16.4  | 21  |

|          |        |                        |              |       |     |
|----------|--------|------------------------|--------------|-------|-----|
| KCNA2    | 3737   | Leukemia, MESH:D015470 | Dexameth     | 16.4  | 8   |
| KITL     | 17311  | Leukemia, MESH:D015473 | Arsenic De   | 16.4  | 158 |
| LAMTOR2  | 28956  | Leukemia, MESH:D015470 | Decitabine   | 16.4  | 20  |
| LIMD2    | 80774  | Leukemia, MESH:D015470 | Arsenic Tr   | 16.4  | 19  |
| MRT04    | 51154  | Leukemia, MESH:D015470 | Dexameth     | 16.4  | 10  |
| NAAA     | 27163  | Leukemia, MESH:D015470 | Arsenic Tr   | 16.4  | 27  |
| NKX2-5   | 1482   | Leukemia, MESH:D015470 | Azacitidine  | 16.4  | 14  |
| NUDT5    | 11164  | Leukemia, MESH:D015470 | Air Polluta  | 16.4  | 14  |
| P2RX5    | 5026   | Leukemia, MESH:D015470 | Doxorubic    | 16.4  | 16  |
| PAG1     | 55824  | Leukemia, MESH:D015473 | Arsenic De   | 16.4  | 156 |
| PI4KA    | 5297   | Leukemia, MESH:D015470 | Arsenic Tr   | 16.4  | 14  |
| R3HDM1   | 23518  | Leukemia, MESH:D004915 | Doxorubic    | 16.4  | 2   |
| RBCK1    | 10616  | Leukemia, MESH:D015470 | Dexameth     | 16.4  | 8   |
| RENBP    | 5973   | Leukemia, MESH:D015473 | Arsenic ar:  | 16.4  | 157 |
| RPRD2    | 23248  | Leukemia, MESH:D004915 | Doxorubic    | 16.4  | 2   |
| SBNO1    | 55206  | Leukemia, MESH:D015470 | Calcitriol T | 16.4  | 11  |
| SYNJ1    | 8867   | Leukemia, MESH:D015470 | Doxorubic    | 16.4  | 13  |
| UNC13D   | 201294 | Leukemia, MESH:D015470 | Doxorubic    | 16.4  | 13  |
| UNC5C    | 8633   | Leukemia, MESH:D015470 | Doxorubic    | 16.4  | 20  |
| WDR61    | 80349  | Leukemia, MESH:D015470 | Dexameth     | 16.4  | 12  |
| WNT2     | 7472   | Leukemia, MESH:D015470 | Decitabine   | 16.4  | 21  |
| ADAMTS1  | 170689 | Leukemia, MESH:D015470 | Arsenic Tr   | 16.39 | 19  |
| C1QTNF4  | 114900 | Leukemia, MESH:D015470 | Arsenic Tr   | 16.39 | 13  |
| CLCN7    | 1186   | Leukemia, MESH:D015470 | Dexameth     | 16.39 | 13  |
| DCK      | 1633   | Leukemia, MESH:D015470 | Cytarabine   | 16.39 | 82  |
| HIPK3    | 10114  | Leukemia, MESH:D015470 | Doxorubic    | 16.39 | 14  |
| MGAT1    | 4245   | Leukemia, MESH:D015470 | Dexameth     | 16.39 | 13  |
| PLCG1    | 5335   | Leukemia, MESH:D015473 | Arsenic ca   | 16.39 | 12  |
| PNRC2    | 55629  | Leukemia, MESH:D015470 | Dexameth     | 16.39 | 14  |
| SH3GL3   | 6457   | Leukemia, MESH:D015470 | Calcitriol E | 16.39 | 8   |
| SORL1    | 6653   | Leukemia, MESH:D015473 | Arsenic ar:  | 16.39 | 158 |
| ZNF660   | 285349 | Leukemia, MESH:D015473 | Arsenic De   | 16.39 | 155 |
| APOB     | 338    | Leukemia, MESH:D004915 | Daunorub     | 16.38 | 3   |
| HK1      | 3098   | Leukemia, MESH:D015473 | Arsenic Ar   | 16.38 | 266 |
| OSGIN1   | 29948  | Leukemia, MESH:D015470 | Bortezomi    | 16.38 | 11  |
| SLCO1A1  | 28248  | Leukemia, MESH:D015470 | Androgen     | 16.38 | 26  |
| MASTL    | 84930  | Leukemia, MESH:D015473 | Arsenic De   | 16.37 | 10  |
| MIS18BP1 | 55320  | Leukemia, MESH:D015473 | arsenite Ci  | 16.37 | 9   |
| NOX4     | 50507  | Leukemia, MESH:D004915 | Cytarabine   | 16.37 | 2   |
| RAB1A    | 5861   | Leukemia, MESH:D015473 | Arsenic Tr   | 16.37 | 263 |
| TNFSF10  | 8743   | Leukemia, MESH:D007948 | Arsenic Tr   | 16.37 | 4   |
| GSTM3    | 2947   | Leukemia, MESH:D015473 | Arsenic Ar   | 16.36 | 266 |
| HIC1     | 3090   | Leukemia, MESH:D015473 | Dexameth     | 16.36 | 153 |
| MXD3     | 83463  | Leukemia, MESH:D015473 | Arsenic Ca   | 16.36 | 158 |
| CHAC2    | 494143 | Leukemia, MESH:D015473 | Calcitriol C | 16.35 | 155 |
| CTTNBP2† | 55917  | Leukemia, MESH:D015473 | Arsenic Ar   | 16.35 | 159 |
| FIGN     | 55137  | Leukemia, MESH:D015473 | Arsenic ar:  | 16.35 | 155 |
| LHB      | 3972   | Leukemia, MESH:D007948 | 2-(2-amin    | 16.35 | 3   |
| MDM2     | 4193   | Leukemia, MESH:D007948 | 2-(2-amin    | 16.35 | 3   |
| NPNT     | 255743 | Leukemia, MESH:D015473 | Arsenic Etr  | 16.35 | 155 |
| PNOC     | 5368   | Leukemia, MESH:D015473 | arsenite G   | 16.35 | 155 |
| RNF128   | 79589  | Leukemia, MESH:D015473 | Arsenic Tr   | 16.35 | 262 |
| TAT      | 6898   | Leukemia, MESH:D015473 | Arsenic Tr   | 16.35 | 262 |
| CCL2     | 6347   | Leukemia, MESH:D007948 | 2-(2-amin    | 16.34 | 3   |
| EPHA7    | 2045   | Leukemia, MESH:D015473 | arsenite D   | 16.34 | 155 |
| GC       | 2638   | Leukemia, MESH:D015470 | Calcitriol E | 16.34 | 15  |
| LYAR     | 55646  | Leukemia, MESH:D015473 | Calcitriol E | 16.34 | 156 |
| NDUFA3   | 4696   | Leukemia, MESH:D015473 | arsenite D   | 16.34 | 157 |



|         |        |                        |              |       |     |
|---------|--------|------------------------|--------------|-------|-----|
| PTPN14  | 5784   | Leukemia, MESH:D015473 | arsenite D   | 16.34 | 155 |
| RPL19   | 6143   | Leukemia, MESH:D015473 | arsenite D   | 16.34 | 8   |
| SRRT    | 51593  | Leukemia, MESH:D015473 | Arsenic Tr   | 16.34 | 263 |
| SUV39H2 | 79723  | Leukemia, MESH:D015473 | Calcitriol C | 16.34 | 156 |
| TIMM8B  | 26521  | Leukemia, MESH:D015473 | Arsenic ar:  | 16.34 | 13  |
| USP10   | 9100   | Leukemia, MESH:D015473 | Arsenic De   | 16.34 | 158 |
| WASF2   | 10163  | Leukemia, MESH:D015473 | arsenite D   | 16.34 | 157 |
| BRD4    | 23476  | Leukemia, MESH:D015470 | Doxorubic    | 16.33 | 14  |
| CCT2    | 10576  | Leukemia, MESH:D015470 | Arsenic Tr   | 16.33 | 20  |
| JMJD6   | 23210  | Leukemia, MESH:D015470 | Dexameth     | 16.33 | 14  |
| NFE2L2  | 4780   | Leukemia, MESH:D007948 | 2-(2-amin    | 16.33 | 3   |
| SLC22A3 | 6581   | Leukemia, MESH:D015470 | Cyclophos    | 16.33 | 25  |
| SORD    | 6652   | Leukemia, MESH:D015470 | Cyclophos    | 16.33 | 10  |
| SYNE2   | 23224  | Leukemia, MESH:D015470 | Doxorubic    | 16.33 | 17  |
| ZFP52   | 22710  | Leukemia, MESH:D015470 | Hydroxyur    | 16.33 | 9   |
| CCNE1   | 898    | Leukemia, MESH:D007948 | 2-(2-amin    | 16.32 | 3   |
| CDK4    | 1019   | Leukemia, MESH:D007948 | 2-(2-amin    | 16.32 | 3   |
| CTLA4   | 1493   | Leukemia, MESH:D015470 | Benzene C    | 16.32 | 29  |
| ESPN    | 83715  | Leukemia, MESH:D015473 | Genistein I  | 16.32 | 7   |
| LCP2    | 3937   | Leukemia, MESH:D015470 | Dronabinc    | 16.32 | 12  |
| LHB     | 3972   | Leukemia, MESH:D015473 | 2-(2-chlor   | 16.32 | 262 |
| MAP3K20 | 51776  | Leukemia, MESH:D015470 | Calcitriol C | 16.32 | 13  |
| NPHP1   | 4867   | Leukemia, MESH:D015470 | Azacitidin   | 16.32 | 11  |
| PKD1    | 5310   | Leukemia, MESH:D015470 | Dexameth     | 16.32 | 7   |
| PLK3    | 1263   | Leukemia, MESH:D015473 | Daunorub     | 16.32 | 19  |
| PRR13   | 54458  | Leukemia, MESH:D015470 | Decitabine   | 16.32 | 15  |
| RAB10   | 10890  | Leukemia, MESH:D015470 | Air Polluta  | 16.32 | 14  |
| WNT2B   | 7482   | Leukemia, MESH:D015470 | (+)-JQ1 α    | 16.32 | 11  |
| ALDOAB  | 406496 | Leukemia, MESH:D015470 | Alitretinoin | 16.31 | 6   |
| ATL3    | 25923  | Leukemia, MESH:D015470 | Dexameth     | 16.31 | 9   |
| ATP5PB  | 515    | Leukemia, MESH:D015470 | Calcitriol C | 16.31 | 13  |
| FAF1    | 11124  | Leukemia, MESH:D015470 | Bortezomi    | 16.31 | 14  |
| FGD6    | 55785  | Leukemia, MESH:D015470 | Doxorubic    | 16.31 | 15  |
| FNTA    | 2339   | Leukemia, MESH:D015470 | Decitabine   | 16.31 | 19  |
| HNRNPH2 | 3188   | Leukemia, MESH:D015470 | Arsenic Tr   | 16.31 | 28  |
| IRX1    | 79192  | Leukemia, MESH:D015470 | Decitabine   | 16.31 | 23  |
| ISOC1   | 51015  | Leukemia, MESH:D015470 | Dexameth     | 16.31 | 15  |
| NDUFA8  | 4702   | Leukemia, MESH:D015470 | Air Polluta  | 16.31 | 12  |
| NLRC5   | 84166  | Leukemia, MESH:D015470 | Calcitriol C | 16.31 | 13  |
| PARD6B  | 84612  | Leukemia, MESH:D015470 | Dronabinc    | 16.31 | 8   |
| RNF145  | 153830 | Leukemia, MESH:D015470 | Calcitriol C | 16.31 | 13  |
| SLC26A6 | 65010  | Leukemia, MESH:D015470 | Dexameth     | 16.31 | 11  |
| SPDEF   | 25803  | Leukemia, MESH:D015470 | Dexameth     | 16.31 | 9   |
| STRN3   | 29966  | Leukemia, MESH:D015470 | Arsenic Tr   | 16.31 | 16  |
| TANC2   | 26115  | Leukemia, MESH:D015470 | Arsenic Tr   | 16.31 | 14  |
| TRAK1   | 22906  | Leukemia, MESH:D015470 | Doxorubic    | 16.31 | 14  |
| ZNF45   | 7596   | Leukemia, MESH:D015470 | Doxorubic    | 16.31 | 20  |
| AHCYL2  | 23382  | Leukemia, MESH:D015470 | Arsenic Tr   | 16.3  | 18  |
| COX7A2  | 1347   | Leukemia, MESH:D015473 | arsenite ca  | 16.3  | 156 |
| FAIM    | 55179  | Leukemia, MESH:D015470 | Dexameth     | 16.3  | 10  |
| GPD1    | 2819   | Leukemia, MESH:D015473 | Arsenic Tr   | 16.3  | 261 |
| H2BC10  | 8346   | Leukemia, MESH:D015470 | Air Polluta  | 16.3  | 14  |
| HUNK    | 30811  | Leukemia, MESH:D015470 | Doxorubic    | 16.3  | 13  |
| ITGB4   | 3691   | Leukemia, MESH:D015473 | Arsenic Tr   | 16.3  | 261 |
| MIR135B | 442891 | Leukemia, MESH:D015470 | Decitabine   | 16.3  | 25  |
| PITPNB  | 23760  | Leukemia, MESH:D015470 | Dexameth     | 16.3  | 16  |
| RCOR2   | 283248 | Leukemia, MESH:D015470 | Dexameth     | 16.3  | 9   |
| AP1G1   | 164    | Leukemia, MESH:D015473 | arsenite Ci  | 16.29 | 153 |

|          |        |                        |              |       |     |
|----------|--------|------------------------|--------------|-------|-----|
| C9ORF64  | 84267  | Leukemia, MESH:D015470 | Air Polluta  | 16.29 | 7   |
| EN1      | 2019   | Leukemia, MESH:D015470 | Decitabine   | 16.29 | 17  |
| FAAP100  | 80233  | Leukemia, MESH:D015470 | Air Polluta  | 16.29 | 7   |
| IBSP     | 3381   | Leukemia, MESH:D007948 | 2-(2-amin    | 16.29 | 1   |
| IFT52    | 51098  | Leukemia, MESH:D015470 | Air Polluta  | 16.29 | 13  |
| LINC0095 | 255031 | Leukemia, MESH:D015470 | Gasoline[C   | 16.29 | 5   |
| MIR22HG  | 84981  | Leukemia, MESH:D015473 | Arsenic[Ca   | 16.29 | 158 |
| MYO15B   | 80022  | Leukemia, MESH:D015470 | Air Polluta  | 16.29 | 6   |
| PCNX1    | 22990  | Leukemia, MESH:D015473 | Arsenic[ar   | 16.29 | 11  |
| TDP1     | 55775  | Leukemia, MESH:D015473 | Arsenic Tr   | 16.29 | 261 |
| TMED8    | 283578 | Leukemia, MESH:D015470 | Doxorubic    | 16.29 | 11  |
| ZNF280C  | 55609  | Leukemia, MESH:D015470 | Doxorubic    | 16.29 | 12  |
| ZNF362   | 149076 | Leukemia, MESH:D015470 | Calcitriol[C | 16.29 | 7   |
| ADAMTS2  | 9509   | Leukemia, MESH:D015473 | Arsenic[Ar   | 16.28 | 263 |
| ADAT3    | 113179 | Leukemia, MESH:D015470 | Arsenic Tr   | 16.28 | 15  |
| AGR3     | 155465 | Leukemia, MESH:D015470 | (+)-JQ1 c    | 16.28 | 8   |
| AUTS2    | 26053  | Leukemia, MESH:D015473 | Arsenic[Ar   | 16.28 | 264 |
| BMP2K    | 55589  | Leukemia, MESH:D015473 | Dexameth     | 16.28 | 153 |
| CCM2     | 83605  | Leukemia, MESH:D015470 | Air Polluta  | 16.28 | 12  |
| DCAKD    | 79877  | Leukemia, MESH:D015473 | Arsenic[ar   | 16.28 | 158 |
| EGLN1    | 54583  | Leukemia, MESH:D015470 | Calcitriol[C | 16.28 | 11  |
| FHIP1B   | 84067  | Leukemia, MESH:D015470 | Dexameth     | 16.28 | 13  |
| GPR50    | 9248   | Leukemia, MESH:D015470 | Calcitriol[C | 16.28 | 12  |
| KNSTRN   | 90417  | Leukemia, MESH:D015470 | Calcitriol[C | 16.28 | 11  |
| LHFPL2   | 10184  | Leukemia, MESH:D015473 | Calcitriol[C | 16.28 | 154 |
| MIR342   | 442909 | Leukemia, MESH:D015470 | Arsenic Tr   | 16.28 | 14  |
| MYL2     | 4633   | Leukemia, MESH:D015473 | Dexameth     | 16.28 | 155 |
| PDCD11   | 22984  | Leukemia, MESH:D015473 | Dexameth     | 16.28 | 153 |
| RNF135   | 84282  | Leukemia, MESH:D015470 | Doxorubic    | 16.28 | 12  |
| SNUPN    | 10073  | Leukemia, MESH:D015470 | Arsenic Tr   | 16.28 | 17  |
| TBC1D10E | 26000  | Leukemia, MESH:D015470 | Doxorubic    | 16.28 | 13  |
| TMEFF2   | 23671  | Leukemia, MESH:D015473 | Arsenic[Ar   | 16.28 | 265 |
| UGT1A1   | 54658  | Leukemia, MESH:D007948 | 2-(2-amin    | 16.28 | 2   |
| VPS35L   | 57020  | Leukemia, MESH:D015473 | arsenite[Ci  | 16.28 | 6   |
| APCDD1   | 147495 | Leukemia, MESH:D015473 | Arsenic[Ca   | 16.27 | 156 |
| CCDC152  | 1E+08  | Leukemia, MESH:D015470 | Doxorubic    | 16.27 | 14  |
| DIS3L    | 115752 | Leukemia, MESH:D015470 | Doxorubic    | 16.27 | 14  |
| ERCC6    | 2074   | Leukemia, MESH:D015470 | Arsenic Tr   | 16.27 | 28  |
| ESRRG    | 2104   | Leukemia, MESH:D015470 | Arsenic Tr   | 16.27 | 19  |
| GNB2     | 2783   | Leukemia, MESH:D015473 | arsenite[D   | 16.27 | 155 |
| IHH      | 3549   | Leukemia, MESH:D015470 | Arsenic Tr   | 16.27 | 18  |
| MAP3K4   | 4216   | Leukemia, MESH:D015473 | Arsenic[ar   | 16.27 | 159 |
| MKNK1    | 8569   | Leukemia, MESH:D007948 | 2-(2-amin    | 16.27 | 2   |
| PXN      | 5829   | Leukemia, MESH:D015470 | Dasatinib    | 16.27 | 14  |
| SLC47A1  | 55244  | Leukemia, MESH:D015473 | Arsenic[Cy   | 16.27 | 20  |
| SPTAN1   | 6709   | Leukemia, MESH:D015473 | Arsenic Tr   | 16.27 | 261 |
| ST3GAL4  | 6484   | Leukemia, MESH:D015473 | arsenite[Ci  | 16.27 | 155 |
| TLE2     | 7089   | Leukemia, MESH:D015473 | Arsenic[Ar   | 16.27 | 263 |
| WDCP     | 80304  | Leukemia, MESH:D015470 | Dexameth     | 16.27 | 12  |
| AQP8A.1  | 447923 | Leukemia, MESH:D015470 | Dronabinc    | 16.26 | 6   |
| C8ORF44  | 56260  | Leukemia, MESH:D015470 | Dexameth     | 16.26 | 5   |
| CARD16   | 114769 | Leukemia, MESH:D015473 | Arsenic Tr   | 16.26 | 261 |
| KLHL24B  | 393412 | Leukemia, MESH:D015470 | Dexameth     | 16.26 | 5   |
| LRRC37A2 | 474170 | Leukemia, MESH:D015470 | Dexameth     | 16.26 | 9   |
| NCOR1    | 9611   | Leukemia, MESH:D015473 | arsenite[Ci  | 16.26 | 158 |
| NT5DC4   | 284958 | Leukemia, MESH:D015470 | Dexameth     | 16.26 | 7   |
| TANGO6   | 79613  | Leukemia, MESH:D015470 | Dexameth     | 16.26 | 12  |
| RGPD5    | 84220  | Leukemia, MESH:D015470 | Arsenic Tr   | 16.25 | 17  |

|         |        |                        |              |       |     |
|---------|--------|------------------------|--------------|-------|-----|
| CYP8B1  | 1582   | Leukemia, MESH:D015470 | Allopurinol  | 16.24 | 27  |
| ENO1    | 2023   | Leukemia, MESH:D004915 | Doxorubicin  | 16.24 | 3   |
| MMP10   | 4319   | Leukemia, MESH:D015473 | Genistein I  | 16.24 | 152 |
| NRTN    | 4902   | Leukemia, MESH:D015473 | Arsenic Ar   | 16.24 | 261 |
| PHTF2   | 57157  | Leukemia, MESH:D015473 | arsenite Ci  | 16.24 | 8   |
| AKAP8   | 10270  | Leukemia, MESH:D015470 | Air Polluta  | 16.23 | 13  |
| CD79B   | 974    | Leukemia, MESH:D015470 | Cyclophos    | 16.23 | 11  |
| E2F5    | 1875   | Leukemia, MESH:D015473 | Arsenic Ar   | 16.23 | 267 |
| GRIA2   | 2891   | Leukemia, MESH:D015473 | Arsenic Tr   | 16.23 | 265 |
| NACA    | 4666   | Leukemia, MESH:D015473 | Arsenic Tr   | 16.23 | 158 |
| PDE8A   | 5151   | Leukemia, MESH:D015470 | Arsenic Tr   | 16.23 | 22  |
| SAFB    | 6294   | Leukemia, MESH:D015470 | Bortezomi    | 16.23 | 8   |
| SLC27A3 | 11000  | Leukemia, MESH:D015473 | arsenite D   | 16.23 | 10  |
| SLC6A9  | 6536   | Leukemia, MESH:D015473 | Arsenic Ar   | 16.23 | 160 |
| SSRP1   | 6749   | Leukemia, MESH:D015470 | Bortezomi    | 16.23 | 16  |
| TIMM17A | 10440  | Leukemia, MESH:D015473 | arsenite D   | 16.23 | 156 |
| ADH1C   | 126    | Leukemia, MESH:D015470 | Dexameth     | 16.22 | 9   |
| ANXA8   | 653145 | Leukemia, MESH:D015473 | Cytarabine   | 16.22 | 156 |
| BICC1   | 80114  | Leukemia, MESH:D015470 | Dexameth     | 16.22 | 13  |
| CA4     | 762    | Leukemia, MESH:D015470 | Decitabine   | 16.22 | 15  |
| CCNT2   | 905    | Leukemia, MESH:D015470 | Benzene R    | 16.22 | 24  |
| CGN     | 57530  | Leukemia, MESH:D015473 | Arsenic Ca   | 16.22 | 155 |
| CITED1  | 4435   | Leukemia, MESH:D015470 | Decitabine   | 16.22 | 21  |
| COPB2   | 9276   | Leukemia, MESH:D015470 | Air Polluta  | 16.22 | 14  |
| CREB3L2 | 64764  | Leukemia, MESH:D015473 | Arsenic Tr   | 16.22 | 261 |
| CYP3A5  | 1577   | Leukemia, MESH:D004915 | Etoposide    | 16.22 | 4   |
| DEGS1   | 8560   | Leukemia, MESH:D015470 | Dexameth     | 16.22 | 8   |
| HR      | 55806  | Leukemia, MESH:D015473 | Calcitriol C | 16.22 | 155 |
| IGF2BP2 | 10644  | Leukemia, MESH:D015473 | Arsenic Ar   | 16.22 | 262 |
| IGSF9   | 57549  | Leukemia, MESH:D015470 | Calcitriol L | 16.22 | 12  |
| IL12RB2 | 3595   | Leukemia, MESH:D015470 | Arsenic Tr   | 16.22 | 14  |
| JAG2    | 3714   | Leukemia, MESH:D015473 | Arsenic Ar   | 16.22 | 161 |
| KAT14   | 57325  | Leukemia, MESH:D015470 | Dexameth     | 16.22 | 12  |
| KCNE1   | 3753   | Leukemia, MESH:D015470 | Arsenic Tr   | 16.22 | 13  |
| MANEA   | 79694  | Leukemia, MESH:D015470 | Doxorubicin  | 16.22 | 17  |
| METRN   | 79006  | Leukemia, MESH:D015470 | Cyclophos    | 16.22 | 13  |
| MRPL50  | 54534  | Leukemia, MESH:D015470 | Doxorubicin  | 16.22 | 16  |
| NHSL1   | 57224  | Leukemia, MESH:D015470 | Air Polluta  | 16.22 | 11  |
| NUP37   | 79023  | Leukemia, MESH:D015470 | Arsenic Tr   | 16.22 | 14  |
| NUP88   | 4927   | Leukemia, MESH:D015470 | Doxorubicin  | 16.22 | 15  |
| PCBP4   | 57060  | Leukemia, MESH:D015470 | Etoposide    | 16.22 | 17  |
| PGPEP1  | 54858  | Leukemia, MESH:D015473 | Calcitriol C | 16.22 | 155 |
| PRR5L   | 79899  | Leukemia, MESH:D015473 | Arsenic Ca   | 16.22 | 10  |
| PTH2R   | 5746   | Leukemia, MESH:D015473 | Arsenic M    | 16.22 | 9   |
| PTP4A3  | 11156  | Leukemia, MESH:D015470 | Bortezomi    | 16.22 | 14  |
| PXDC1   | 221749 | Leukemia, MESH:D015470 | Decitabine   | 16.22 | 14  |
| RAB5C   | 5878   | Leukemia, MESH:D015470 | Decitabine   | 16.22 | 17  |
| SAR1A   | 56681  | Leukemia, MESH:D015470 | Arsenic Tr   | 16.22 | 16  |
| SNRNP70 | 6625   | Leukemia, MESH:D015470 | Decitabine   | 16.22 | 16  |
| SPEN    | 23013  | Leukemia, MESH:D015470 | Doxorubicin  | 16.22 | 14  |
| STMN3   | 50861  | Leukemia, MESH:D015470 | Cyclophos    | 16.22 | 13  |
| THRAP3  | 9967   | Leukemia, MESH:D015470 | Irinotecan   | 16.22 | 11  |
| TK2     | 7084   | Leukemia, MESH:D015470 | Air Polluta  | 16.22 | 79  |
| ALPK1   | 80216  | Leukemia, MESH:D015470 | Dexameth     | 16.21 | 13  |
| B3GNT2  | 10678  | Leukemia, MESH:D015473 | arsenite Ci  | 16.21 | 155 |
| FZD7    | 8324   | Leukemia, MESH:D015470 | Decitabine   | 16.21 | 17  |
| GABBR1  | 2550   | Leukemia, MESH:D015470 | Arsenic Tr   | 16.21 | 19  |
| NPC2    | 10577  | Leukemia, MESH:D015470 | Decitabine   | 16.21 | 18  |

|          |        |                        |              |       |     |
|----------|--------|------------------------|--------------|-------|-----|
| PDCD6    | 10016  | Leukemia, MESH:D015470 | Dexameth     | 16.21 | 12  |
| PIK3IP1  | 113791 | Leukemia, MESH:D015473 | Arsenic Ca   | 16.21 | 156 |
| PTPRM    | 5797   | Leukemia, MESH:D015473 | arsenite Ci  | 16.21 | 155 |
| RPS19    | 6223   | Leukemia, MESH:D015470 | Bortezomi    | 16.21 | 17  |
| SCN8A    | 6334   | Leukemia, MESH:D015473 | arsenite D   | 16.21 | 155 |
| SMAD9    | 4093   | Leukemia, MESH:D015473 | Arsenic De   | 16.21 | 158 |
| SMARCA5  | 8467   | Leukemia, MESH:D015473 | arsenite G   | 16.21 | 156 |
| SRPK2    | 6733   | Leukemia, MESH:D015473 | Arsenic jar  | 16.21 | 156 |
| TCEAL8   | 90843  | Leukemia, MESH:D015470 | Dexameth     | 16.21 | 12  |
| TM4SF1   | 4071   | Leukemia, MESH:D015470 | Arsenic Tr   | 16.21 | 15  |
| WDR75    | 84128  | Leukemia, MESH:D015470 | Dexameth     | 16.21 | 13  |
| GPATCH8  | 23131  | Leukemia, MESH:D004915 | Doxorubic    | 16.2  | 2   |
| ITGB3    | 3690   | Leukemia, MESH:D015470 | Arsenic Tr   | 16.2  | 27  |
| ACTG1    | 71     | Leukemia, MESH:D015473 | Arsenic Tr   | 16.19 | 262 |
| FOXO1    | 2308   | Leukemia, MESH:D004915 | Doxorubic    | 16.19 | 3   |
| BCL2L1   | 598    | Leukemia, MESH:D004915 | Cytarabine   | 16.18 | 3   |
| CCL13    | 6357   | Leukemia, MESH:D015473 | Dexameth     | 16.18 | 4   |
| RPTN     | 126638 | Leukemia, MESH:D015473 | Antimony     | 16.18 | 154 |
| ADGRF4   | 221393 | Leukemia, MESH:D015470 | Calcitriol E | 16.17 | 8   |
| ADIPOQ   | 9370   | Leukemia, MESH:D007948 | Arsenic Tr   | 16.17 | 4   |
| MIR181C  | 406957 | Leukemia, MESH:D015470 | Arsenic Tr   | 16.17 | 14  |
| PPP1R3A  | 5506   | Leukemia, MESH:D015470 | Daunorub     | 16.17 | 44  |
| CCR3     | 1232   | Leukemia, MESH:D015473 | Arsenic De   | 16.16 | 155 |
| CDC42BP1 | 8476   | Leukemia, MESH:D015473 | Arsenic Ar   | 16.16 | 264 |
| CXCL10   | 3627   | Leukemia, MESH:D007948 | 2-(2-amin    | 16.16 | 3   |
| GUSB     | 2990   | Leukemia, MESH:D015473 | alpha-Toc    | 16.16 | 156 |
| HOXC8    | 3224   | Leukemia, MESH:D015473 | arsenite Ci  | 16.16 | 155 |
| IL18     | 3606   | Leukemia, MESH:D007948 | 2-(2-amin    | 16.16 | 3   |
| MLXIPL   | 51085  | Leukemia, MESH:D015470 | Decitabine   | 16.16 | 15  |
| NUMB     | 8650   | Leukemia, MESH:D015473 | Arsenic Ar   | 16.16 | 264 |
| PSME2    | 5721   | Leukemia, MESH:D015473 | Arsenic Ar   | 16.16 | 267 |
| RNASE2   | 6036   | Leukemia, MESH:D015470 | Arsenic Tr   | 16.16 | 79  |
| SELPLG   | 6404   | Leukemia, MESH:D015473 | Arsenic Tr   | 16.16 | 261 |
| SIRT1    | 23411  | Leukemia, MESH:D007948 | Arsenic Tr   | 16.16 | 3   |
| THPO     | 7066   | Leukemia, MESH:D007948 | pyrazolan    | 16.16 | 2   |
| UGT3A1   | 133688 | Leukemia, MESH:D015470 | Ethylnitros  | 16.16 | 7   |
| BCAR1    | 9564   | Leukemia, MESH:D015470 | Arsenic Tr   | 16.15 | 20  |
| CAMK2A   | 815    | Leukemia, MESH:D015473 | Arsenic Ar   | 16.15 | 161 |
| COX6A1   | 1337   | Leukemia, MESH:D015473 | arsenite D   | 16.15 | 9   |
| CREB5    | 9586   | Leukemia, MESH:D015470 | Arsenic Tr   | 16.15 | 26  |
| DCPS     | 28960  | Leukemia, MESH:D015470 | Benzoates    | 16.15 | 14  |
| DENND6B  | 414918 | Leukemia, MESH:D015470 | Calcitriol E | 16.15 | 11  |
| DMGDH    | 29958  | Leukemia, MESH:D015473 | Calcitriol E | 16.15 | 153 |
| DPP9     | 91039  | Leukemia, MESH:D015473 | Arsenic jar  | 16.15 | 11  |
| EEF2K    | 29904  | Leukemia, MESH:D015470 | Doxorubic    | 16.15 | 14  |
| ETFA     | 2108   | Leukemia, MESH:D015470 | Arsenic Tr   | 16.15 | 21  |
| GNAI1    | 2770   | Leukemia, MESH:D015470 | Doxorubic    | 16.15 | 14  |
| GPR63    | 81491  | Leukemia, MESH:D015473 | Arsenic jar  | 16.15 | 11  |
| GRIA1    | 2890   | Leukemia, MESH:D015473 | Arsenic Tr   | 16.15 | 263 |
| HOXC5    | 3222   | Leukemia, MESH:D015470 | Alitretnoi   | 16.15 | 7   |
| HSD3B1   | 3283   | Leukemia, MESH:D015470 | Azacitidine  | 16.15 | 17  |
| IDO1     | 3620   | Leukemia, MESH:D015470 | Decitabine   | 16.15 | 17  |
| MNS1     | 55329  | Leukemia, MESH:D015473 | Calcitriol E | 16.15 | 153 |
| PLCB3    | 5331   | Leukemia, MESH:D015473 | arsenite Ci  | 16.15 | 157 |
| PPID     | 5481   | Leukemia, MESH:D015473 | Arsenic De   | 16.15 | 12  |
| PPP2R2B  | 5521   | Leukemia, MESH:D015470 | Decitabine   | 16.15 | 20  |
| REEP6    | 92840  | Leukemia, MESH:D015470 | Decitabine   | 16.15 | 19  |
| RPLP2    | 6181   | Leukemia, MESH:D015473 | arsenite Ci  | 16.15 | 9   |

|          |          |                        |              |       |     |
|----------|----------|------------------------|--------------|-------|-----|
| SLC31A2  | 1318     | Leukemia, MESH:D015473 | Calcitriol[E | 16.15 | 153 |
| SYBU     | 55638    | Leukemia, MESH:D015473 | Arsenic[Ca   | 16.15 | 158 |
| TGFB111  | 7041     | Leukemia, MESH:D015470 | Alitretinoi  | 16.15 | 20  |
| ARNTL2   | 56938    | Leukemia, MESH:D015470 | Dasatinib[I  | 16.14 | 13  |
| ASPEN    | 54829    | Leukemia, MESH:D015470 | Calcitriol[E | 16.14 | 12  |
| C21ORF5E | 54058    | Leukemia, MESH:D015470 | Calcitriol[C | 16.14 | 7   |
| EPHB3    | 2049     | Leukemia, MESH:D015470 | Doxorubic    | 16.14 | 13  |
| FUT3     | 2525     | Leukemia, MESH:D015473 | Arsenic Tr   | 16.14 | 154 |
| GANAB    | 23193    | Leukemia, MESH:D015470 | Arsenic Tr   | 16.14 | 22  |
| INTS5    | 80789    | Leukemia, MESH:D015470 | Doxorubic    | 16.14 | 14  |
| KIAA1671 | 85379    | Leukemia, MESH:D015470 | Calcitriol[C | 16.14 | 74  |
| MADD     | 8567     | Leukemia, MESH:D015473 | Dexameth     | 16.14 | 155 |
| MSS51    | 118490   | Leukemia, MESH:D015470 | Cyclophos    | 16.14 | 11  |
| MTRF1L   | 54516    | Leukemia, MESH:D015470 | Decitabine   | 16.14 | 20  |
| NOVA1    | 4857     | Leukemia, MESH:D015470 | Arsenic Tr   | 16.14 | 82  |
| OSBP2    | 23762    | Leukemia, MESH:D015470 | Decitabine   | 16.14 | 18  |
| PRIMPOL  | 201973   | Leukemia, MESH:D015473 | Calcitriol[E | 16.14 | 152 |
| PRXL2C   | 195827   | Leukemia, MESH:D015470 | Air Polluta  | 16.14 | 6   |
| PTGS2    | 5743     | Leukemia, MESH:D004915 | Cytarabine   | 16.14 | 3   |
| RAB40C   | 57799    | Leukemia, MESH:D015470 | Dexameth     | 16.14 | 8   |
| RLF      | 6018     | Leukemia, MESH:D015470 | Air Polluta  | 16.14 | 13  |
| RNF13    | 11342    | Leukemia, MESH:D015473 | Arsenic[Ar   | 16.14 | 263 |
| SAPCD2   | 89958    | Leukemia, MESH:D015470 | Arsenic Tr   | 16.14 | 20  |
| TGS1     | 96764    | Leukemia, MESH:D015470 | Indometha    | 16.14 | 11  |
| TICRR    | 90381    | Leukemia, MESH:D015470 | Calcitriol[E | 16.14 | 8   |
| TMEM100  | 55273    | Leukemia, MESH:D015470 | Calcitriol[C | 16.14 | 11  |
| TRIM17   | 51127    | Leukemia, MESH:D015470 | Dronabinc    | 16.14 | 7   |
| TRIOBP   | 11078    | Leukemia, MESH:D015470 | Dexameth     | 16.14 | 7   |
| ZBTB43   | 23099    | Leukemia, MESH:D015470 | Air Polluta  | 16.14 | 11  |
| ADSL     | 158      | Leukemia, MESH:D015470 | Arsenic Tr   | 16.13 | 18  |
| AGPAT9   | 1.03E+08 | Leukemia, MESH:D015470 | Arsenic Tr   | 16.13 | 13  |
| ASTN2    | 23245    | Leukemia, MESH:D015470 | Decitabine   | 16.13 | 19  |
| ATG4B    | 23192    | Leukemia, MESH:D015470 | Arsenic Tr   | 16.13 | 21  |
| ATP8B2   | 57198    | Leukemia, MESH:D015470 | Dronabinc    | 16.13 | 10  |
| C4ORF46  | 201725   | Leukemia, MESH:D015473 | Calcitriol[F | 16.13 | 155 |
| CTDSP1   | 58190    | Leukemia, MESH:D015470 | Arsenic Tr   | 16.13 | 15  |
| CXCL6    | 6372     | Leukemia, MESH:D015470 | Dexameth     | 16.13 | 13  |
| DYNC1I1  | 1780     | Leukemia, MESH:D015470 | Bortezomi    | 16.13 | 14  |
| ECPAS    | 23392    | Leukemia, MESH:D015470 | Arsenic Tr   | 16.13 | 13  |
| FAM131B  | 9715     | Leukemia, MESH:D015470 | Calcitriol[T | 16.13 | 7   |
| GRAMD1E  | 57476    | Leukemia, MESH:D015470 | (+)-JQ1 c    | 16.13 | 9   |
| GRWD1    | 83743    | Leukemia, MESH:D015470 | Doxorubic    | 16.13 | 15  |
| H2AC17   | 8336     | Leukemia, MESH:D015470 | Arsenic Tr   | 16.13 | 17  |
| KDM5A    | 5927     | Leukemia, MESH:D015470 | (+)-JQ1 c    | 16.13 | 11  |
| KIF21A   | 55605    | Leukemia, MESH:D015470 | Dexameth     | 16.13 | 11  |
| LRRK1    | 79705    | Leukemia, MESH:D015470 | Arsenic Tr   | 16.13 | 13  |
| MOGS     | 7841     | Leukemia, MESH:D015470 | Dexameth     | 16.13 | 13  |
| MYOCD    | 93649    | Leukemia, MESH:D015470 | Arsenic Tr   | 16.13 | 20  |
| NCR3LG1  | 374383   | Leukemia, MESH:D015470 | Air Polluta  | 16.13 | 12  |
| PALS2    | 51678    | Leukemia, MESH:D015470 | Cytarabine   | 16.13 | 82  |
| PITPNA   | 5306     | Leukemia, MESH:D015470 | Doxorubic    | 16.13 | 14  |
| PWWP3A   | 84939    | Leukemia, MESH:D015470 | Arsenic Tr   | 16.13 | 14  |
| RFK      | 55312    | Leukemia, MESH:D015470 | Dexameth     | 16.13 | 13  |
| SH3PXD2E | 285590   | Leukemia, MESH:D015470 | Calcitriol[E | 16.13 | 12  |
| SLC25A18 | 83733    | Leukemia, MESH:D015470 | Dexameth     | 16.13 | 11  |
| SPIN1    | 10927    | Leukemia, MESH:D015470 | Dexameth     | 16.13 | 8   |
| TBC1D16  | 125058   | Leukemia, MESH:D015470 | Doxorubic    | 16.13 | 12  |
| TMEM132  | 92293    | Leukemia, MESH:D015470 | Dexameth     | 16.13 | 6   |

|          |        |                        |              |       |     |
|----------|--------|------------------------|--------------|-------|-----|
| UACA     | 55075  | Leukemia, MESH:D015470 | Doxorubic    | 16.13 | 14  |
| UBTF     | 7343   | Leukemia, MESH:D015470 | Dexameth     | 16.13 | 12  |
| WRAP53   | 55135  | Leukemia, MESH:D015470 | Calcitriol C | 16.13 | 6   |
| CEP97    | 79598  | Leukemia, MESH:D015470 | Doxorubic    | 16.12 | 12  |
| CLBA1    | 122616 | Leukemia, MESH:D015470 | Dexameth     | 16.12 | 7   |
| FBXO42   | 54455  | Leukemia, MESH:D015470 | Dexameth     | 16.12 | 12  |
| FUZ      | 80199  | Leukemia, MESH:D015470 | Dexameth     | 16.12 | 7   |
| MON1A    | 84315  | Leukemia, MESH:D015470 | Doxorubic    | 16.12 | 12  |
| OLFM4    | 10562  | Leukemia, MESH:D015470 | Dexameth     | 16.12 | 7   |
| RERG     | 85004  | Leukemia, MESH:D007948 | Arsenic Tr   | 16.12 | 4   |
| ACSL4    | 2182   | Leukemia, MESH:D015473 | arsenite D   | 16.11 | 157 |
| ADCY2    | 108    | Leukemia, MESH:D015473 | Arsenic ars  | 16.11 | 11  |
| MDN1     | 23195  | Leukemia, MESH:D015473 | Dexameth     | 16.11 | 156 |
| TNF      | 7124   | Leukemia, MESH:D004915 | Cytarabine   | 16.11 | 4   |
| CFL1     | 1072   | Leukemia, MESH:D015470 | Arsenic Tr   | 16.1  | 21  |
| CLYBL    | 171425 | Leukemia, MESH:D015473 | Daunorub     | 16.1  | 160 |
| EPSTI1   | 94240  | Leukemia, MESH:D015473 | Arsenic Tr   | 16.1  | 262 |
| PIAS1    | 8554   | Leukemia, MESH:D015473 | Arsenic Ar   | 16.1  | 159 |
| SPRY2    | 10253  | Leukemia, MESH:D015470 | Calcitriol C | 16.1  | 9   |
| TDO2     | 6999   | Leukemia, MESH:D015470 | Allopurinol  | 16.1  | 12  |
| APOBEC3  | 27350  | Leukemia, MESH:D004915 | Doxorubic    | 16.09 | 3   |
| B3GNT5   | 84002  | Leukemia, MESH:D015473 | Dexameth     | 16.09 | 156 |
| CASP3    | 836    | Leukemia, MESH:D007948 | 2-(2-amin    | 16.09 | 4   |
| CLSTN1   | 22883  | Leukemia, MESH:D015473 | Arsenic Tr   | 16.09 | 258 |
| FGFBP1   | 9982   | Leukemia, MESH:D015473 | Arsenic ars  | 16.09 | 157 |
| FBNP1L   | 54874  | Leukemia, MESH:D015473 | Arsenic Tr   | 16.09 | 263 |
| GJA5     | 2702   | Leukemia, MESH:D015473 | Arsenic Tr   | 16.09 | 260 |
| PXMP4    | 11264  | Leukemia, MESH:D015473 | arsenite D   | 16.09 | 9   |
| SLC2A9   | 56606  | Leukemia, MESH:D015473 | Arsenic ars  | 16.09 | 13  |
| TCOF1    | 6949   | Leukemia, MESH:D015473 | Arsenic Ca   | 16.09 | 158 |
| TXNL1    | 9352   | Leukemia, MESH:D015470 | Dexameth     | 16.09 | 19  |
| ZMYM3    | 9203   | Leukemia, MESH:D015473 | Dexameth     | 16.09 | 7   |
| ARPC2    | 10109  | Leukemia, MESH:D015473 | Arsenic De   | 16.08 | 156 |
| CLCC1    | 23155  | Leukemia, MESH:D004915 | Doxorubic    | 16.08 | 2   |
| DLGAP4   | 22839  | Leukemia, MESH:D015473 | Arsenic Ar   | 16.08 | 263 |
| IFNAR2   | 3455   | Leukemia, MESH:D015473 | Arsenic De   | 16.08 | 155 |
| MFAP5    | 8076   | Leukemia, MESH:D015473 | Calcitriol C | 16.08 | 156 |
| MYOG     | 4656   | Leukemia, MESH:D015473 | Arsenic De   | 16.08 | 158 |
| PAFAH1B3 | 5050   | Leukemia, MESH:D015473 | Arsenic Tr   | 16.08 | 260 |
| RAB3D    | 9545   | Leukemia, MESH:D015473 | arsenite D   | 16.08 | 157 |
| SLC12A5  | 57468  | Leukemia, MESH:D015473 | arsenite D   | 16.08 | 155 |
| TP53AIP1 | 63970  | Leukemia, MESH:D015470 | 2-(2-chlor   | 16.08 | 18  |
| ZNF148   | 7707   | Leukemia, MESH:D004915 | Doxorubic    | 16.08 | 2   |
| CLCN1    | 1180   | Leukemia, MESH:D015473 | caffeic acid | 16.07 | 4   |
| MAPK7    | 5598   | Leukemia, MESH:D007948 | Arsenic Tr   | 16.07 | 3   |
| MIR146A  | 406938 | Leukemia, MESH:D007948 | 2-(2-amin    | 16.07 | 3   |
| PDK4     | 5166   | Leukemia, MESH:D015473 | arsenite D   | 16.07 | 157 |
| ACVRL1   | 94     | Leukemia, MESH:D015473 | alpha-Toc    | 16.06 | 263 |
| SLN      | 6588   | Leukemia, MESH:D015470 | Cytarabine   | 16.06 | 77  |
| AARS1    | 16     | Leukemia, MESH:D015470 | Air Polluta  | 16.05 | 21  |
| ACIN1    | 22985  | Leukemia, MESH:D015473 | Buthionine   | 16.05 | 155 |
| ALPI     | 248    | Leukemia, MESH:D015473 | Genistein I  | 16.05 | 6   |
| APMAP    | 57136  | Leukemia, MESH:D015470 | Alitretnoin  | 16.05 | 13  |
| BRD8     | 10902  | Leukemia, MESH:D015470 | Air Polluta  | 16.05 | 9   |
| CNTRL    | 11064  | Leukemia, MESH:D015470 | Cytarabine   | 16.05 | 85  |
| CTPS1    | 1503   | Leukemia, MESH:D015470 | Arsenic Tr   | 16.05 | 27  |
| EHF      | 26298  | Leukemia, MESH:D015470 | Calcitriol C | 16.05 | 8   |
| F5       | 2153   | Leukemia, MESH:D015473 | Antimony     | 16.05 | 264 |

|          |        |                            |              |       |     |
|----------|--------|----------------------------|--------------|-------|-----|
| GRP      | 2922   | Leukemia, MESH:D015470     | Arsenic Tr   | 16.05 | 18  |
| IL18R1   | 8809   | Leukemia, MESH:D015470     | Bortezomi    | 16.05 | 9   |
| SNTG2    | 54221  | Leukemia, MESH:D015470     | Methotrex    | 16.05 | 10  |
| TESC     | 54997  | Leukemia, MESH:D015470     | Doxorubic    | 16.05 | 13  |
| TNNT3    | 7140   | Leukemia, MESH:D015470     | Dexameth     | 16.05 | 9   |
| USP47    | 55031  | Leukemia, MESH:D015470     | Doxorubic    | 16.05 | 13  |
| WNT1     | 7471   | Leukemia, MESH:D015470     | Benzene C    | 16.05 | 30  |
| YKT6     | 10652  | Leukemia, MESH:D015470     | Arsenic Tr   | 16.05 | 14  |
| ATXN2    | 6311   | Leukemia, MESH:D015470     | Dexameth     | 16.04 | 14  |
| CETN2    | 1069   | Leukemia, MESH:D015470     | Dexameth     | 16.04 | 12  |
| FOXG1    | 2290   | Leukemia, MESH:D015470     | Dexameth     | 16.04 | 10  |
| GLRX2    | 51022  | Leukemia, MESH:D015470     | Indometha    | 16.04 | 10  |
| GSE1     | 23199  | Leukemia, MESH:D015470     | Doxorubic    | 16.04 | 13  |
| LRRC25   | 126364 | Leukemia, MESH:D015470     | Air Polluta  | 16.04 | 10  |
| MAMDC2   | 256691 | Leukemia, MESH:D015473     | Arsenic Tr   | 16.04 | 154 |
| MKLN1    | 4289   | Leukemia, MESH:D015473     | Arsenic Ca   | 16.04 | 10  |
| PGRMC1   | 10857  | Leukemia, MESH:D015470     | Dexameth     | 16.04 | 15  |
| PLCD1    | 5333   | Leukemia, MESH:D015473     | Arsenic Ar   | 16.04 | 159 |
| RPRM     | 56475  | Leukemia, MESH:D015470     | Decitabine   | 16.04 | 16  |
| S100A10  | 6281   | Leukemia, MESH:D015473     | Arsenic Tr   | 16.04 | 266 |
| SLC1A6   | 6511   | Leukemia, MESH:D015473     | arsenite Ci  | 16.04 | 158 |
| TG       | 7038   | Leukemia, MESH:D015470     | 15-deoxy-    | 16.04 | 18  |
| TMEM86A  | 144110 | Leukemia, MESH:D015470     | Dexameth     | 16.04 | 9   |
| ZBTB4    | 57659  | Leukemia, MESH:D015470     | Dexameth     | 16.04 | 8   |
| NUMA1    | 4926   | Leukemia, MESH:D01marker/m | Arsenic Tr   | 16.03 | 156 |
| MEP1A.2  | 565535 | Leukemia, MESH:D015470     | Dronabinc    | 16.03 | 6   |
| NBL1     | 4681   | Leukemia, MESH:D015473     | Arsenic Ca   | 16.03 | 154 |
| RGS5     | 8490   | Leukemia, MESH:D015470     | Doxorubic    | 16.03 | 15  |
| RNF213   | 57674  | Leukemia, MESH:D015473     | Arsenic ar   | 16.03 | 157 |
| SLC34A2  | 10568  | Leukemia, MESH:D015470     | Calcitriol C | 16.03 | 12  |
| XRCC4    | 7518   | Leukemia, MESH:D015473     | Arsenic Ar   | 16.03 | 160 |
| ATPAF2   | 91647  | Leukemia, MESH:D015473     | Resveratrc   | 16.02 | 158 |
| BMPR1B   | 658    | Leukemia, MESH:D015473     | Arsenic Ca   | 16.02 | 158 |
| CXCL8    | 3576   | Leukemia, MESH:D007948     | 2-(2-amin    | 16.02 | 3   |
| GCNT1    | 2650   | Leukemia, MESH:D015473     | Calcitriol C | 16.02 | 153 |
| PLCB3    | 5331   | Leukemia, MESH:D007948     | 2-(2-amin    | 16.02 | 2   |
| PROM1    | 8842   | Leukemia, MESH:D015473     | Arsenic Ar   | 16.02 | 169 |
| QRICH1   | 54870  | Leukemia, MESH:D015470     | Gasoline P   | 16.02 | 9   |
| TYK2     | 7297   | Leukemia, MESH:D015473     | Arsenic Tr   | 16.02 | 260 |
| ANKS1A   | 23294  | Leukemia, MESH:D015470     | Arsenic Tr   | 16.01 | 79  |
| CD70     | 970    | Leukemia, MESH:D007948     | 2-(2-amin    | 16.01 | 2   |
| MAGEA12  | 4111   | Leukemia, MESH:D015470     | Decitabine   | 16.01 | 22  |
| MMP12    | 4321   | Leukemia, MESH:D015473     | Arsenic Tr   | 16.01 | 154 |
| RELN     | 5649   | Leukemia, MESH:D015473     | arsenite Ci  | 16.01 | 159 |
| ZMAT5    | 55954  | Leukemia, MESH:D015470     | Dexameth     | 16.01 | 10  |
| FAM131A  | 131408 | Leukemia, MESH:D015470     | Benzene C    | 16    | 28  |
| HOXB-AS  | 404266 | Leukemia, MESH:D015470     | Cytarabine   | 16    | 75  |
| INO80    | 54617  | Leukemia, MESH:D015470     | Arsenic Tr   | 16    | 12  |
| SOX15    | 6665   | Leukemia, MESH:D015470     | Decitabine   | 16    | 13  |
| ABHD13   | 84945  | Leukemia, MESH:D015470     | Doxorubic    | 15.99 | 11  |
| ALKBH1   | 8846   | Leukemia, MESH:D015470     | Doxorubic    | 15.99 | 15  |
| COPRS    | 55352  | Leukemia, MESH:D015473     | arsenite Ci  | 15.99 | 154 |
| GTF2IRD2 | 389524 | Leukemia, MESH:D015470     | Air Polluta  | 15.99 | 11  |
| LGALS3B  | 325599 | Leukemia, MESH:D015473     | Dexameth     | 15.99 | 152 |
| NAT9     | 26151  | Leukemia, MESH:D015470     | Dexameth     | 15.99 | 10  |
| NRSN2    | 80023  | Leukemia, MESH:D015470     | Dexameth     | 15.99 | 13  |
| NUDT22   | 84304  | Leukemia, MESH:D015470     | Doxorubic    | 15.99 | 11  |
| TBC1D32  | 221322 | Leukemia, MESH:D015470     | Gasoline li  | 15.99 | 6   |

|         |        |                        |              |       |     |
|---------|--------|------------------------|--------------|-------|-----|
| TMEM26  | 219623 | Leukemia, MESH:D015473 | arsenite G   | 15.99 | 7   |
| ADAMTS1 | 171019 | Leukemia, MESH:D015470 | Doxorubic    | 15.98 | 12  |
| ARHGAP1 | 89839  | Leukemia, MESH:D015470 | Calcitriol E | 15.98 | 7   |
| ASXL3   | 80816  | Leukemia, MESH:D015470 | Doxorubic    | 15.98 | 11  |
| ATG4D   | 84971  | Leukemia, MESH:D015470 | Methotrex    | 15.98 | 9   |
| B4GALT3 | 8703   | Leukemia, MESH:D015470 | Doxorubic    | 15.98 | 14  |
| C5ORF34 | 375444 | Leukemia, MESH:D015470 | Calcitriol ( | 15.98 | 7   |
| DBNDD1  | 79007  | Leukemia, MESH:D015470 | Calcitriol ( | 15.98 | 7   |
| GK5     | 256356 | Leukemia, MESH:D015470 | Calcitriol E | 15.98 | 11  |
| HSDL1   | 83693  | Leukemia, MESH:D015470 | Arsenic Tr   | 15.98 | 17  |
| IL6RA   | 16194  | Leukemia, MESH:D015473 | Arsenic De   | 15.98 | 13  |
| LAMTOR1 | 55004  | Leukemia, MESH:D015470 | Doxorubic    | 15.98 | 12  |
| LEMD3   | 23592  | Leukemia, MESH:D015470 | Dexameth     | 15.98 | 12  |
| LRRC47  | 57470  | Leukemia, MESH:D004915 | Doxorubic    | 15.98 | 3   |
| MBIP    | 51562  | Leukemia, MESH:D015470 | Doxorubic    | 15.98 | 11  |
| MRPL28  | 10573  | Leukemia, MESH:D015470 | Dronabinc    | 15.98 | 7   |
| NMT2    | 9397   | Leukemia, MESH:D015473 | Arsenic Ar   | 15.98 | 261 |
| PSMB5   | 5693   | Leukemia, MESH:D015470 | Bortezomi    | 15.98 | 15  |
| RUSC1   | 23623  | Leukemia, MESH:D015470 | Dexameth     | 15.98 | 6   |
| SNU13   | 4809   | Leukemia, MESH:D015470 | Arsenic Tr   | 15.98 | 18  |
| SRRM3   | 222183 | Leukemia, MESH:D015470 | Calcitriol E | 15.98 | 6   |
| TMEM178 | 130733 | Leukemia, MESH:D015470 | Arsenic Tr   | 15.98 | 13  |
| TMEM242 | 729515 | Leukemia, MESH:D015470 | Dexameth     | 15.98 | 12  |
| TPRN    | 286262 | Leukemia, MESH:D015470 | Dexameth     | 15.98 | 6   |
| TRIM34  | 53840  | Leukemia, MESH:D015470 | Dexameth     | 15.98 | 12  |
| ZNF135  | 7694   | Leukemia, MESH:D015470 | Medroxypr    | 15.98 | 8   |
| ZNF641  | 121274 | Leukemia, MESH:D015470 | Arsenic Tr   | 15.98 | 12  |
| ABCC1   | 4363   | Leukemia, MESH:D007948 | Arsenic Tr   | 15.97 | 4   |
| ATP5D   | 66043  | Leukemia, MESH:D015470 | Dexameth     | 15.97 | 11  |
| DPCD    | 25911  | Leukemia, MESH:D015470 | Dexameth     | 15.97 | 11  |
| DVL2    | 1856   | Leukemia, MESH:D015470 | Decitabine   | 15.97 | 13  |
| IARS1   | 3376   | Leukemia, MESH:D015470 | Arsenic Tr   | 15.97 | 14  |
| PPAN    | 56342  | Leukemia, MESH:D015473 | Arsenic Ge   | 15.97 | 11  |
| RBM12   | 10137  | Leukemia, MESH:D015470 | Arsenic Tr   | 15.97 | 22  |
| RBM45   | 129831 | Leukemia, MESH:D015470 | Dexameth     | 15.97 | 7   |
| RPS2    | 6187   | Leukemia, MESH:D015470 | Dexameth     | 15.97 | 11  |
| SMURF2  | 64750  | Leukemia, MESH:D015470 | Bortezomi    | 15.97 | 19  |
| SOX8    | 30812  | Leukemia, MESH:D015470 | Azacitidine  | 15.97 | 10  |
| SPACA9  | 11092  | Leukemia, MESH:D015470 | Arsenic Tr   | 15.97 | 17  |
| THOC5   | 8563   | Leukemia, MESH:D015470 | Dexameth     | 15.97 | 7   |
| UCHL5   | 51377  | Leukemia, MESH:D015470 | Arsenic Tr   | 15.97 | 13  |
| VRK3    | 51231  | Leukemia, MESH:D015470 | Dexameth     | 15.97 | 11  |
| ZNF598  | 90850  | Leukemia, MESH:D015473 | Arsenic lar  | 15.97 | 10  |
| AAAS    | 8086   | Leukemia, MESH:D015470 | Doxorubic    | 15.96 | 13  |
| ADAR    | 103    | Leukemia, MESH:D015470 | Arsenic Tr   | 15.96 | 20  |
| APOBB.1 | 321166 | Leukemia, MESH:D015473 | Dexameth     | 15.96 | 153 |
| BTBD11  | 121551 | Leukemia, MESH:D015470 | Benzene E    | 15.96 | 22  |
| CD164   | 8763   | Leukemia, MESH:D015470 | Arsenic Tr   | 15.96 | 18  |
| CHRNE   | 1145   | Leukemia, MESH:D015470 | Calcitriol M | 15.96 | 10  |
| CRLF1   | 9244   | Leukemia, MESH:D015470 | Calcitriol E | 15.96 | 13  |
| DAD1    | 1603   | Leukemia, MESH:D015473 | Arsenic Tr   | 15.96 | 260 |
| DDX1    | 1653   | Leukemia, MESH:D015473 | Arsenic Tr   | 15.96 | 263 |
| EIF4E3  | 317649 | Leukemia, MESH:D015470 | Arsenic Tr   | 15.96 | 14  |
| EXOSC2  | 23404  | Leukemia, MESH:D015473 | Arsenic Tr   | 15.96 | 262 |
| HAUS4   | 54930  | Leukemia, MESH:D015470 | Calcitriol E | 15.96 | 14  |
| HINT1   | 3094   | Leukemia, MESH:D015473 | arsenite D   | 15.96 | 155 |
| HIVEP3  | 59269  | Leukemia, MESH:D015473 | Arsenic De   | 15.96 | 156 |
| HLTF    | 6596   | Leukemia, MESH:D015470 | Air Polluta  | 15.96 | 15  |



|          |        |                        |              |       |     |
|----------|--------|------------------------|--------------|-------|-----|
| IDH3G    | 3421   | Leukemia, MESH:D015470 | Dexameth     | 15.96 | 14  |
| IGSF1    | 3547   | Leukemia, MESH:D015470 | Dexameth     | 15.96 | 13  |
| KDM7A    | 80853  | Leukemia, MESH:D015473 | Arsenic Tr   | 15.96 | 262 |
| KPNA1    | 3836   | Leukemia, MESH:D015470 | Benzene C    | 15.96 | 22  |
| LHPP     | 64077  | Leukemia, MESH:D015470 | Dexameth     | 15.96 | 13  |
| NEGR1    | 257194 | Leukemia, MESH:D015470 | Calcitriol C | 15.96 | 13  |
| NMT1     | 4836   | Leukemia, MESH:D015470 | Arsenic Tr   | 15.96 | 19  |
| NOL1     | 1E+08  | Leukemia, MESH:D015470 | Calcitriol M | 15.96 | 8   |
| PCBP1    | 5093   | Leukemia, MESH:D015470 | Arsenic Tr   | 15.96 | 16  |
| RBM24    | 221662 | Leukemia, MESH:D015473 | arsenite C   | 15.96 | 157 |
| RGPD6    | 729540 | Leukemia, MESH:D015470 | Dexameth     | 15.96 | 9   |
| SHB      | 6461   | Leukemia, MESH:D015470 | Methotrex    | 15.96 | 11  |
| TSPAN12  | 23554  | Leukemia, MESH:D015470 | Dexameth     | 15.96 | 9   |
| TTC39A   | 22996  | Leukemia, MESH:D015470 | Bortezomi    | 15.96 | 14  |
| TUBA8    | 51807  | Leukemia, MESH:D015473 | Arsenic Ar   | 15.96 | 263 |
| USP1     | 7398   | Leukemia, MESH:D015470 | Calcitriol ( | 15.96 | 10  |
| UTP25    | 27042  | Leukemia, MESH:D004915 | Doxorubic    | 15.96 | 2   |
| VAPA     | 9218   | Leukemia, MESH:D015470 | Benzene C    | 15.96 | 23  |
| CDC27    | 996    | Leukemia, MESH:D007948 | Arsenic Tr   | 15.95 | 3   |
| DNAJC1   | 64215  | Leukemia, MESH:D015470 | Doxorubic    | 15.95 | 13  |
| FAM210B  | 116151 | Leukemia, MESH:D015473 | arsenite D   | 15.95 | 155 |
| GPIA     | 246094 | Leukemia, MESH:D015470 | Dexameth     | 15.95 | 5   |
| PGAM1A   | 323107 | Leukemia, MESH:D015470 | Dexameth     | 15.95 | 5   |
| PIPOX    | 51268  | Leukemia, MESH:D015473 | Arsenic De   | 15.95 | 156 |
| PTPRU    | 10076  | Leukemia, MESH:D015473 | Arsenic De   | 15.95 | 156 |
| HBB      | 3043   | Leukemia, MESH:D015473 | Arsenic Tr   | 15.94 | 156 |
| ZNF718   | 255403 | Leukemia, MESH:D015470 | Calcitriol T | 15.94 | 5   |
| DYRK1A   | 1859   | Leukemia, MESH:D007948 | Arsenic Tr   | 15.93 | 3   |
| FUT8-AS1 | 645431 | Leukemia, MESH:D015470 | Dexameth     | 15.93 | 5   |
| GJA1B    | 30236  | Leukemia, MESH:D015470 | Indometha    | 15.93 | 6   |
| LGALS9   | 3965   | Leukemia, MESH:D015473 | Arsenic Ar   | 15.93 | 266 |
| PBX1A    | 58138  | Leukemia, MESH:D015470 | Dronabinc    | 15.93 | 6   |
| PRKCQ-A  | 439949 | Leukemia, MESH:D015470 | (+)-JQ1 α    | 15.93 | 6   |
| APOC1    | 341    | Leukemia, MESH:D015470 | Decitabine   | 15.92 | 21  |
| CLEC18B  | 497190 | Leukemia, MESH:D015470 | Dexameth     | 15.92 | 5   |
| EPB41    | 2035   | Leukemia, MESH:D015473 | Arsenic Ch   | 15.92 | 155 |
| FIS1     | 51024  | Leukemia, MESH:D015470 | Deferoxan    | 15.92 | 14  |
| GOT2     | 2806   | Leukemia, MESH:D015470 | Arsenic Tr   | 15.92 | 19  |
| MFN1     | 55669  | Leukemia, MESH:D015470 | Arsenic Tr   | 15.92 | 21  |
| MTMR9LP  | 339483 | Leukemia, MESH:D015470 | Dexameth     | 15.92 | 5   |
| OSMR     | 9180   | Leukemia, MESH:D015470 | Decitabine   | 15.92 | 21  |
| RRAS2    | 22800  | Leukemia, MESH:D015470 | Arsenic Tr   | 15.92 | 22  |
| SAA2     | 6289   | Leukemia, MESH:D015473 | Calcitriol C | 15.92 | 155 |
| SIRT3    | 23410  | Leukemia, MESH:D015470 | Arsenic Tr   | 15.92 | 23  |
| SLC26A2  | 1836   | Leukemia, MESH:D015473 | Methotrex    | 15.92 | 158 |
| SYN1     | 6853   | Leukemia, MESH:D015470 | Air Polluta  | 15.92 | 15  |
| ZNF71    | 58491  | Leukemia, MESH:D015470 | Doxorubic    | 15.92 | 10  |
| CXCR4    | 7852   | Leukemia, MESH:D004915 | Cytarabine   | 15.91 | 2   |
| LORICRIN | 4014   | Leukemia, MESH:D015473 | Antimony     | 15.91 | 153 |
| RBM25    | 58517  | Leukemia, MESH:D015473 | Arsenic De   | 15.91 | 13  |
| SCNN1G   | 6340   | Leukemia, MESH:D015473 | Arsenic Ca   | 15.91 | 155 |
| ATXN7    | 6314   | Leukemia, MESH:D004915 | Doxorubic    | 15.9  | 2   |
| CDCP1    | 64866  | Leukemia, MESH:D015473 | Arsenic Ca   | 15.9  | 156 |
| DNER     | 92737  | Leukemia, MESH:D015473 | Arsenic Ca   | 15.9  | 155 |
| ELK3     | 2004   | Leukemia, MESH:D015473 | arsenite D   | 15.9  | 155 |
| LMNB2    | 84823  | Leukemia, MESH:D015473 | arsenite D   | 15.9  | 8   |
| MFAP2    | 4237   | Leukemia, MESH:D015473 | Arsenic ars  | 15.9  | 156 |
| NR1I2    | 8856   | Leukemia, MESH:D004915 | Doxorubic    | 15.9  | 4   |

|          |        |                        |              |       |     |
|----------|--------|------------------------|--------------|-------|-----|
| POLR1B   | 84172  | Leukemia, MESH:D015473 | Dexameth     | 15.9  | 153 |
| RNF125   | 54941  | Leukemia, MESH:D015473 | Arsenic Ge   | 15.9  | 155 |
| RPL21    | 6144   | Leukemia, MESH:D015473 | Arsenic Tr   | 15.9  | 260 |
| SDC4     | 6385   | Leukemia, MESH:D015473 | Arsenic Tr   | 15.9  | 263 |
| SEMA4D   | 10507  | Leukemia, MESH:D015473 | Arsenic lar  | 15.9  | 156 |
| SGK3     | 23678  | Leukemia, MESH:D015473 | Arsenic Ge   | 15.9  | 157 |
| SH3BGRL3 | 83442  | Leukemia, MESH:D015473 | Arsenic Tr   | 15.9  | 262 |
| ADM2     | 79924  | Leukemia, MESH:D015470 | Decitabine   | 15.89 | 15  |
| BPI      | 671    | Leukemia, MESH:D015473 | Arsenic Tr   | 15.89 | 264 |
| CBS      | 875    | Leukemia, MESH:D015470 | Gasoline li  | 15.89 | 11  |
| CCT4     | 10575  | Leukemia, MESH:D015473 | arsenite D   | 15.89 | 157 |
| CYP51    | 13121  | Leukemia, MESH:D015470 | Bezafibrat   | 15.89 | 13  |
| FADD     | 8772   | Leukemia, MESH:D015470 | Decitabine   | 15.89 | 25  |
| IL2RA    | 3559   | Leukemia, MESH:D015473 | Arsenic Ca   | 15.89 | 13  |
| NDUFV1   | 4723   | Leukemia, MESH:D015470 | Air Polluta  | 15.89 | 13  |
| NEUROD1  | 4760   | Leukemia, MESH:D015473 | Arsenic lar  | 15.89 | 157 |
| PGP      | 283871 | Leukemia, MESH:D015470 | Air Polluta  | 15.89 | 16  |
| SLC18A2  | 6571   | Leukemia, MESH:D015473 | arsenite Ci  | 15.89 | 9   |
| ZCCHC7   | 84186  | Leukemia, MESH:D015473 | arsenite D   | 15.89 | 157 |
| ADAM15   | 8751   | Leukemia, MESH:D015470 | Dexameth     | 15.88 | 12  |
| ADPGK    | 83440  | Leukemia, MESH:D015470 | Dexameth     | 15.88 | 12  |
| AGAP1    | 116987 | Leukemia, MESH:D015470 | Decitabine   | 15.88 | 15  |
| BRD3     | 8019   | Leukemia, MESH:D015470 | Dexameth     | 15.88 | 9   |
| CYP3A23- | 25642  | Leukemia, MESH:D015473 | arsenite Ci  | 15.88 | 9   |
| FNDC1    | 84624  | Leukemia, MESH:D015470 | Arsenic Tr   | 15.88 | 20  |
| HLA-DMB  | 3109   | Leukemia, MESH:D015470 | Benzene B    | 15.88 | 22  |
| IL17RA   | 23765  | Leukemia, MESH:D015470 | Air Polluta  | 15.88 | 26  |
| KCNMB4   | 27345  | Leukemia, MESH:D015470 | Calcitriol L | 15.88 | 16  |
| KPNA3    | 3839   | Leukemia, MESH:D015470 | Calcitriol L | 15.88 | 16  |
| LRBA     | 987    | Leukemia, MESH:D015473 | arsenite Ci  | 15.88 | 159 |
| LYST     | 1130   | Leukemia, MESH:D015470 | Air Polluta  | 15.88 | 13  |
| MICALL1  | 85377  | Leukemia, MESH:D015470 | Doxorubic    | 15.88 | 12  |
| NDRG1    | 10397  | Leukemia, MESH:D015473 | Arsenic Tr   | 15.88 | 266 |
| RFX5     | 5993   | Leukemia, MESH:D015470 | Dexameth     | 15.88 | 12  |
| SH3BP2   | 6452   | Leukemia, MESH:D015470 | Doxorubic    | 15.88 | 13  |
| SMARCC1  | 6599   | Leukemia, MESH:D015470 | Arsenic Tr   | 15.88 | 14  |
| USO1     | 8615   | Leukemia, MESH:D015470 | Air Polluta  | 15.88 | 8   |
| ARL6IP5  | 10550  | Leukemia, MESH:D015473 | Arsenic Tr   | 15.87 | 263 |
| C1ORF112 | 55732  | Leukemia, MESH:D015470 | Calcitriol L | 15.87 | 9   |
| CAPZB    | 832    | Leukemia, MESH:D015470 | Arsenic Tr   | 15.87 | 19  |
| CASP9    | 842    | Leukemia, MESH:D007948 | 2-(2-amin    | 15.87 | 3   |
| CDR2     | 1039   | Leukemia, MESH:D015470 | Dexameth     | 15.87 | 8   |
| FOXC2    | 2303   | Leukemia, MESH:D015473 | arsenite ca  | 15.87 | 154 |
| H4C12    | 8362   | Leukemia, MESH:D015473 | Arsenic Ar   | 15.87 | 158 |
| IFNA2    | 3440   | Leukemia, MESH:D015470 | Arsenic Tr   | 15.87 | 22  |
| MAP7     | 9053   | Leukemia, MESH:D015473 | Arsenic Tr   | 15.87 | 259 |
| MSRB3    | 253827 | Leukemia, MESH:D015470 | Arsenic Tr   | 15.87 | 13  |
| NXN      | 64359  | Leukemia, MESH:D015470 | (+)-JQ1 c    | 15.87 | 10  |
| OSER1    | 51526  | Leukemia, MESH:D015470 | Dexameth     | 15.87 | 12  |
| PLA2G10  | 8399   | Leukemia, MESH:D015470 | Calcitriol L | 15.87 | 11  |
| SPG7     | 6687   | Leukemia, MESH:D015470 | Dexameth     | 15.87 | 15  |
| STIP1    | 10963  | Leukemia, MESH:D015473 | Arsenic Tr   | 15.87 | 158 |
| TLK2     | 11011  | Leukemia, MESH:D015470 | Doxorubic    | 15.87 | 14  |
| WDR4     | 10785  | Leukemia, MESH:D015470 | Dexameth     | 15.87 | 8   |
| ATP8A1   | 10396  | Leukemia, MESH:D015473 | Arsenic Ar   | 15.86 | 161 |
| BAHD1    | 22893  | Leukemia, MESH:D015470 | Doxorubic    | 15.86 | 11  |
| CD3D     | 915    | Leukemia, MESH:D015473 | Calcitriol L | 15.86 | 155 |
| CELF1    | 10658  | Leukemia, MESH:D015473 | Arsenic De   | 15.86 | 158 |

|         |        |                        |              |       |     |
|---------|--------|------------------------|--------------|-------|-----|
| DEK     | 7913   | Leukemia, MESH:D015470 | Calcitriol C | 15.86 | 15  |
| FAM174B | 400451 | Leukemia, MESH:D015470 | Doxorubic    | 15.86 | 11  |
| GABRB3  | 2562   | Leukemia, MESH:D015470 | Arsenic Tr   | 15.86 | 19  |
| GRHL1   | 29841  | Leukemia, MESH:D015473 | Antimony     | 15.86 | 154 |
| HDGFL2  | 84717  | Leukemia, MESH:D015470 | Decitabine   | 15.86 | 14  |
| NSUN3   | 63899  | Leukemia, MESH:D015470 | Doxorubic    | 15.86 | 13  |
| S100A11 | 6282   | Leukemia, MESH:D015473 | Arsenic Ar   | 15.86 | 263 |
| BTNL9   | 153579 | Leukemia, MESH:D015470 | Doxorubic    | 15.85 | 12  |
| CD1D    | 912    | Leukemia, MESH:D015473 | Arsenic Tr   | 15.85 | 260 |
| CTHRC1  | 115908 | Leukemia, MESH:D015473 | arsenite C   | 15.85 | 155 |
| DTX4    | 23220  | Leukemia, MESH:D015473 | Calcitriol C | 15.85 | 6   |
| FLACC1  | 130540 | Leukemia, MESH:D015470 | Doxorubic    | 15.85 | 11  |
| HROB    | 78995  | Leukemia, MESH:D015470 | Calcitriol C | 15.85 | 13  |
| KLHL32  | 114792 | Leukemia, MESH:D015473 | Arsenic Ar   | 15.85 | 158 |
| LHX2    | 9355   | Leukemia, MESH:D015473 | arsenite D   | 15.85 | 155 |
| LIM2    | 3982   | Leukemia, MESH:D015470 | Alitretinoin | 15.85 | 7   |
| MDC1    | 9656   | Leukemia, MESH:D015473 | Arsenic ar:  | 15.85 | 156 |
| MEIS1   | 4211   | Leukemia, MESH:D015473 | Arsenic ar:  | 15.85 | 158 |
| MYL5    | 4636   | Leukemia, MESH:D015470 | Benzene C    | 15.85 | 21  |
| NCR1    | 9437   | Leukemia, MESH:D015470 | Bortezomi    | 15.85 | 8   |
| OTUD5   | 55593  | Leukemia, MESH:D015470 | Doxorubic    | 15.85 | 15  |
| PGD     | 5226   | Leukemia, MESH:D015470 | Arsenic Tr   | 15.85 | 17  |
| PPP1R17 | 10842  | Leukemia, MESH:D015470 | Benzene C    | 15.85 | 21  |
| SLA     | 6503   | Leukemia, MESH:D007948 | Arsenic Tr   | 15.85 | 4   |
| SLFN13  | 146857 | Leukemia, MESH:D015470 | Methotrex    | 15.85 | 10  |
| TEKT2   | 27285  | Leukemia, MESH:D015470 | Dexameth     | 15.85 | 6   |
| TGM4    | 7047   | Leukemia, MESH:D015470 | Calcitriol C | 15.85 | 7   |
| TMTC2   | 160335 | Leukemia, MESH:D015473 | Arsenic Ar   | 15.85 | 160 |
| TMUB1   | 83590  | Leukemia, MESH:D015470 | (+)-JQ1 co   | 15.85 | 6   |
| TUBG1   | 7283   | Leukemia, MESH:D015473 | Arsenic Tr   | 15.85 | 262 |
| UNK     | 85451  | Leukemia, MESH:D015470 | Decitabine   | 15.85 | 15  |
| ZKSCAN7 | 55888  | Leukemia, MESH:D015470 | Calcitriol C | 15.85 | 7   |
| ZSCAN2  | 54993  | Leukemia, MESH:D015470 | Arsenic Tr   | 15.85 | 24  |
| ATG3    | 64422  | Leukemia, MESH:D015473 | Arsenic Tr   | 15.84 | 263 |
| ATN1    | 1822   | Leukemia, MESH:D004915 | Cytarabine   | 15.84 | 2   |
| BOLA2   | 552900 | Leukemia, MESH:D015470 | Doxorubic    | 15.84 | 12  |
| CHD9    | 80205  | Leukemia, MESH:D015473 | arsenite C   | 15.84 | 155 |
| CLCA1   | 1179   | Leukemia, MESH:D015473 | Arsenic De   | 15.84 | 11  |
| FSTL5   | 56884  | Leukemia, MESH:D015470 | Arsenic Tr   | 15.84 | 20  |
| KREMEN1 | 83999  | Leukemia, MESH:D015470 | Calcitriol C | 15.84 | 12  |
| LRRTM1  | 347730 | Leukemia, MESH:D015470 | Indometha    | 15.84 | 7   |
| PITPNC1 | 26207  | Leukemia, MESH:D015473 | Arsenic Ar   | 15.84 | 263 |
| PLIN4   | 729359 | Leukemia, MESH:D015473 | arsenite D   | 15.84 | 8   |
| RAD51B  | 5890   | Leukemia, MESH:D015473 | Arsenic ar:  | 15.84 | 157 |
| SOX11   | 6664   | Leukemia, MESH:D015473 | Arsenic ar:  | 15.84 | 156 |
| SPICE1  | 152185 | Leukemia, MESH:D015470 | Arsenic Tr   | 15.84 | 17  |
| SPPL3   | 121665 | Leukemia, MESH:D015470 | Dexameth     | 15.84 | 11  |
| TMEM59L | 25789  | Leukemia, MESH:D015470 | Arsenic Tr   | 15.84 | 12  |
| ZNF143  | 7702   | Leukemia, MESH:D015470 | Doxorubic    | 15.84 | 13  |
| ZNF281  | 23528  | Leukemia, MESH:D015470 | Arsenic Tr   | 15.84 | 13  |
| ACSF3   | 197322 | Leukemia, MESH:D015470 | Doxorubic    | 15.83 | 12  |
| DNMT1   | 1786   | Leukemia, MESH:D004915 | Doxorubic    | 15.83 | 3   |
| GAS6    | 2621   | Leukemia, MESH:D015473 | caffeic aci  | 15.83 | 155 |
| GOLGA7  | 51125  | Leukemia, MESH:D015470 | Dexameth     | 15.83 | 11  |
| GSTO2   | 119391 | Leukemia, MESH:D015473 | Arsenic Ar   | 15.83 | 263 |
| PPFIA4  | 8497   | Leukemia, MESH:D015473 | Arsenic ar:  | 15.83 | 157 |
| SSBP2   | 23635  | Leukemia, MESH:D015473 | Arsenic Tr   | 15.83 | 260 |
| SULT1E1 | 6783   | Leukemia, MESH:D015473 | Antimony     | 15.83 | 8   |

|          |        |                        |              |       |     |
|----------|--------|------------------------|--------------|-------|-----|
| TOPBP1   | 11073  | Leukemia, MESH:D015473 | Calcitriol L | 15.83 | 29  |
| PFKFB3   | 5209   | Leukemia, MESH:D015473 | Arsenic De   | 15.82 | 158 |
| ANG      | 283    | Leukemia, MESH:D015470 | Decitabine   | 15.81 | 16  |
| AP1S2    | 8905   | Leukemia, MESH:D015473 | Dexameth     | 15.81 | 156 |
| GLIPR2   | 152007 | Leukemia, MESH:D015473 | arsenite C   | 15.81 | 155 |
| PTPN21   | 11099  | Leukemia, MESH:D007948 | Arsenic Tr   | 15.81 | 3   |
| SKP1     | 6500   | Leukemia, MESH:D015473 | Arsenic ar   | 15.81 | 11  |
| ALS2     | 57679  | Leukemia, MESH:D015470 | Arsenic Tr   | 15.8  | 20  |
| ATG10    | 83734  | Leukemia, MESH:D015470 | Dexameth     | 15.8  | 9   |
| CSTB     | 1476   | Leukemia, MESH:D015470 | Arsenic Tr   | 15.8  | 19  |
| FABP6    | 2172   | Leukemia, MESH:D015470 | Dronabinc    | 15.8  | 10  |
| NAPEPLD  | 222236 | Leukemia, MESH:D015470 | Air Polluta  | 15.8  | 8   |
| PCMTD1   | 115294 | Leukemia, MESH:D015470 | Dasatinib    | 15.8  | 10  |
| PCYT1A   | 5130   | Leukemia, MESH:D015470 | Bezafibrat   | 15.8  | 16  |
| PLOD1    | 5351   | Leukemia, MESH:D015470 | Cyclophos    | 15.8  | 79  |
| POLR1C   | 9533   | Leukemia, MESH:D015470 | Dexameth     | 15.8  | 16  |
| PROSER2  | 254427 | Leukemia, MESH:D015470 | Calcitriol C | 15.8  | 9   |
| BST1     | 683    | Leukemia, MESH:D015470 | Dexameth     | 15.79 | 10  |
| CHST3    | 9469   | Leukemia, MESH:D015470 | Calcitriol E | 15.79 | 12  |
| CPSF6    | 11052  | Leukemia, MESH:D015470 | Doxorubic    | 15.79 | 16  |
| CTDSPL   | 10217  | Leukemia, MESH:D015470 | Dexameth     | 15.79 | 7   |
| FBP1     | 2203   | Leukemia, MESH:D015473 | Arsenic Tr   | 15.79 | 266 |
| IFT81    | 28981  | Leukemia, MESH:D004915 | Doxorubic    | 15.79 | 2   |
| LRIG3    | 121227 | Leukemia, MESH:D015470 | Calcitriol E | 15.79 | 13  |
| MAN2A1   | 4124   | Leukemia, MESH:D015473 | Arsenic ar   | 15.79 | 156 |
| MIR22    | 407004 | Leukemia, MESH:D015473 | Calcitriol M | 15.79 | 155 |
| PDZRN3   | 23024  | Leukemia, MESH:D015470 | Calcitriol E | 15.79 | 8   |
| PPIC     | 5480   | Leukemia, MESH:D015473 | Calcitriol C | 15.79 | 156 |
| RAB38    | 23682  | Leukemia, MESH:D015470 | Dexameth     | 15.79 | 10  |
| REV3L    | 5980   | Leukemia, MESH:D015470 | Dexameth     | 15.79 | 13  |
| RPS25    | 6230   | Leukemia, MESH:D015470 | Arsenic Tr   | 15.79 | 18  |
| SERINC5  | 256987 | Leukemia, MESH:D015470 | (+)-JQ1 c    | 15.79 | 11  |
| SLC25A29 | 123096 | Leukemia, MESH:D015470 | Indometha    | 15.79 | 8   |
| TSPAN4   | 7106   | Leukemia, MESH:D015473 | Arsenic Tr   | 15.79 | 263 |
| AFAP1    | 60312  | Leukemia, MESH:D015473 | Arsenic Ar   | 15.78 | 265 |
| CD9      | 928    | Leukemia, MESH:D015473 | Arsenic Ar   | 15.78 | 263 |
| DSTN     | 11034  | Leukemia, MESH:D015473 | arsenite G   | 15.78 | 156 |
| FTH1     | 2495   | Leukemia, MESH:D004915 | Doxorubic    | 15.78 | 3   |
| LSR      | 51599  | Leukemia, MESH:D015473 | Arsenic Tr   | 15.78 | 261 |
| MMP15    | 4324   | Leukemia, MESH:D015473 | Arsenic Ge   | 15.78 | 155 |
| MYO5B    | 4645   | Leukemia, MESH:D015473 | Arsenic Tr   | 15.78 | 261 |
| SEMA7A   | 8482   | Leukemia, MESH:D015473 | Arsenic Tr   | 15.78 | 260 |
| SMIM3    | 85027  | Leukemia, MESH:D015473 | Calcitriol E | 15.78 | 154 |
| TICAM1   | 148022 | Leukemia, MESH:D015473 | Dexameth     | 15.78 | 7   |
| ADCY1    | 107    | Leukemia, MESH:D015473 | Arsenic Tr   | 15.77 | 262 |
| NIPIA1   | 9284   | Leukemia, MESH:D015473 | Dexameth     | 15.77 | 155 |
| RUVBL1   | 8607   | Leukemia, MESH:D015473 | Arsenic Tr   | 15.77 | 262 |
| UBA7     | 7318   | Leukemia, MESH:D015473 | arsenic dis  | 15.77 | 158 |
| ATP5ME   | 521    | Leukemia, MESH:D004915 | Doxorubic    | 15.76 | 3   |
| BRAF     | 673    | Leukemia, MESH:D015473 | Arsenic Ar   | 15.76 | 264 |
| DLEU2L   | 79469  | Leukemia, MESH:D015473 | arsenic dis  | 15.76 | 6   |
| OPN1MW   | 728458 | Leukemia, MESH:D015470 | Alitretnoi   | 15.76 | 7   |
| PIK3R2   | 5296   | Leukemia, MESH:D015473 | Antimony     | 15.76 | 155 |
| STK10    | 6793   | Leukemia, MESH:D015473 | arsenite D   | 15.76 | 153 |
| ADAM17   | 6868   | Leukemia, MESH:D015470 | Dexameth     | 15.75 | 11  |
| ATM      | 472    | Leukemia, MESH:D004915 | Daunorub     | 15.75 | 2   |
| HES6     | 55502  | Leukemia, MESH:D015470 | Dexameth     | 15.75 | 13  |
| RDH2     | 107460 | Leukemia, MESH:D015470 | Dexameth     | 15.75 | 7   |

|          |        |                        |              |       |     |
|----------|--------|------------------------|--------------|-------|-----|
| RUVBL2   | 10856  | Leukemia, MESH:D015473 | Arsenic Tr   | 15.75 | 263 |
| IL23R    | 149233 | Leukemia, MESH:D015470 | (+)-JQ1 c    | 15.74 | 11  |
| MIR185   | 406961 | Leukemia, MESH:D015470 | Dronabinc    | 15.74 | 8   |
| NRXN3    | 9369   | Leukemia, MESH:D015473 | Arsenic Tr   | 15.74 | 260 |
| PRKCI    | 5584   | Leukemia, MESH:D015473 | arsenite[D   | 15.74 | 159 |
| THSD7B   | 80731  | Leukemia, MESH:D015473 | Arsenic[Ar   | 15.74 | 261 |
| YLPM1    | 56252  | Leukemia, MESH:D004915 | Doxorubic    | 15.74 | 2   |
| ARHGAP2  | 58504  | Leukemia, MESH:D015473 | Dasatinib    | 15.73 | 153 |
| ARHGEF7  | 8874   | Leukemia, MESH:D015473 | Arsenic[ar   | 15.73 | 157 |
| CD22     | 933    | Leukemia, MESH:D015473 | Arsenic Tr   | 15.73 | 264 |
| EN2      | 2020   | Leukemia, MESH:D015470 | Etoposide    | 15.73 | 24  |
| MOSMO    | 730094 | Leukemia, MESH:D015473 | Arsenic[Ca   | 15.73 | 154 |
| SCG2     | 7857   | Leukemia, MESH:D015473 | Arsenic Tr   | 15.73 | 260 |
| TFEC     | 22797  | Leukemia, MESH:D015470 | Air Polluta  | 15.73 | 17  |
| TLR5     | 7100   | Leukemia, MESH:D007948 | 2-(2-amin    | 15.73 | 2   |
| XXYLT1   | 152002 | Leukemia, MESH:D015470 | Bortezomi    | 15.73 | 8   |
| ZNF559   | 84527  | Leukemia, MESH:D015470 | Air Polluta  | 15.73 | 13  |
| ABCF2    | 10061  | Leukemia, MESH:D015470 | Air Polluta  | 15.72 | 12  |
| CARS1    | 833    | Leukemia, MESH:D015473 | Arsenic Tr   | 15.72 | 154 |
| CCNC     | 892    | Leukemia, MESH:D015473 | Arsenic[Ca   | 15.72 | 156 |
| CMC2     | 56942  | Leukemia, MESH:D015470 | Daunorub     | 15.72 | 35  |
| CYP19A1  | 1588   | Leukemia, MESH:D007948 | 2-(2-amin    | 15.72 | 2   |
| GCOM1    | 145781 | Leukemia, MESH:D015470 | Air Polluta  | 15.72 | 13  |
| GPR146   | 115330 | Leukemia, MESH:D015470 | (+)-JQ1 c    | 15.72 | 9   |
| HOMER2   | 9455   | Leukemia, MESH:D015470 | Arsenic Tr   | 15.72 | 20  |
| HSH2D    | 84941  | Leukemia, MESH:D015470 | Calcitriol   | 15.72 | 10  |
| IL1RL1   | 9173   | Leukemia, MESH:D015473 | Arsenic[Ca   | 15.72 | 156 |
| IL6ST    | 3572   | Leukemia, MESH:D015473 | Arsenic Tr   | 15.72 | 262 |
| NDUFA7   | 4701   | Leukemia, MESH:D015470 | Decitabine   | 15.72 | 16  |
| NPPC     | 4880   | Leukemia, MESH:D015470 | Calcitriol C | 15.72 | 9   |
| PCM1     | 5108   | Leukemia, MESH:D015473 | Arsenic Tr   | 15.72 | 262 |
| PIGB     | 9488   | Leukemia, MESH:D015473 | Arsenic[Mi   | 15.72 | 154 |
| PNKD     | 25953  | Leukemia, MESH:D015470 | Calcitriol C | 15.72 | 15  |
| PPP3CC   | 5533   | Leukemia, MESH:D015470 | Air Polluta  | 15.72 | 21  |
| RAB4B    | 53916  | Leukemia, MESH:D015470 | Calcitriol C | 15.72 | 11  |
| RDH13    | 112724 | Leukemia, MESH:D015470 | Bortezomi    | 15.72 | 9   |
| SLC12A4  | 6560   | Leukemia, MESH:D015473 | Genistein    | 15.72 | 154 |
| SPHKAP   | 80309  | Leukemia, MESH:D015470 | Decitabine   | 15.72 | 19  |
| TENT2    | 167153 | Leukemia, MESH:D015470 | Arsenic Tr   | 15.72 | 18  |
| TMOD2    | 29767  | Leukemia, MESH:D015470 | Dexameth     | 15.72 | 7   |
| TNFAIP8L | 126282 | Leukemia, MESH:D015470 | Bortezomi    | 15.72 | 12  |
| U2AF1L4  | 199746 | Leukemia, MESH:D015470 | Dexameth     | 15.72 | 11  |
| VIPR1    | 7433   | Leukemia, MESH:D015473 | Arsenic[ar   | 15.72 | 155 |
| ZFAND5   | 7763   | Leukemia, MESH:D015473 | Arsenic Tr   | 15.72 | 261 |
| ARF6     | 382    | Leukemia, MESH:D015470 | Bortezomi    | 15.71 | 14  |
| ARMCX3   | 51566  | Leukemia, MESH:D015470 | Arsenic Tr   | 15.71 | 15  |
| ARSD     | 414    | Leukemia, MESH:D015470 | Doxorubic    | 15.71 | 14  |
| CCN4     | 8840   | Leukemia, MESH:D007948 | Arsenic Tr   | 15.71 | 3   |
| CLEC2B   | 9976   | Leukemia, MESH:D015470 | Decitabine   | 15.71 | 14  |
| CPEB3    | 22849  | Leukemia, MESH:D015470 | Calcitriol C | 15.71 | 13  |
| CSNK1D   | 1453   | Leukemia, MESH:D007948 | Arsenic Tr   | 15.71 | 3   |
| CTU2     | 348180 | Leukemia, MESH:D015470 | Calcitriol C | 15.71 | 11  |
| DGAT1A   | 325875 | Leukemia, MESH:D015470 | Alitretnoi   | 15.71 | 7   |
| FEZ2     | 9637   | Leukemia, MESH:D015470 | Air Polluta  | 15.71 | 13  |
| FSTL3    | 10272  | Leukemia, MESH:D015470 | Doxorubic    | 15.71 | 12  |
| HENMT1   | 113802 | Leukemia, MESH:D015470 | Arsenic Tr   | 15.71 | 12  |
| IFT80    | 57560  | Leukemia, MESH:D015470 | Doxorubic    | 15.71 | 13  |
| INVS     | 27130  | Leukemia, MESH:D015470 | Dexameth     | 15.71 | 13  |

|           |        |                        |             |       |     |
|-----------|--------|------------------------|-------------|-------|-----|
| KITL      | 17311  | Leukemia, MESH:D015470 | Cyclophos   | 15.71 | 10  |
| LCLAT1    | 253558 | Leukemia, MESH:D015470 | Dronabinc   | 15.71 | 10  |
| LIN9      | 286826 | Leukemia, MESH:D015470 | Calcitriol  | 15.71 | 7   |
| MIPEP     | 4285   | Leukemia, MESH:D015470 | Dexameth    | 15.71 | 8   |
| NBPF10    | 1E+08  | Leukemia, MESH:D015473 | Calcitriol  | 15.71 | 153 |
| NPC1L1    | 29881  | Leukemia, MESH:D015470 | Dexameth    | 15.71 | 10  |
| NXPH1     | 30010  | Leukemia, MESH:D015470 | Dexameth    | 15.71 | 7   |
| ODF2      | 4957   | Leukemia, MESH:D015470 | Dexameth    | 15.71 | 13  |
| PCDH9     | 5101   | Leukemia, MESH:D015470 | Dexameth    | 15.71 | 13  |
| RCBTB2    | 1102   | Leukemia, MESH:D015470 | Air Polluta | 15.71 | 8   |
| RENBP     | 5973   | Leukemia, MESH:D015470 | Decitabine  | 15.71 | 15  |
| SEC23A    | 10484  | Leukemia, MESH:D015470 | Cyclophos   | 15.71 | 13  |
| SENP8     | 123228 | Leukemia, MESH:D015470 | Doxorubic   | 15.71 | 11  |
| SFT2D1    | 113402 | Leukemia, MESH:D015470 | Air Polluta | 15.71 | 7   |
| SMAD5     | 4090   | Leukemia, MESH:D015473 | Arsenic De  | 15.71 | 158 |
| SNX15     | 29907  | Leukemia, MESH:D015470 | Dexameth    | 15.71 | 6   |
| SYPL2     | 284612 | Leukemia, MESH:D015470 | Dexameth    | 15.71 | 14  |
| TENT4B    | 64282  | Leukemia, MESH:D015470 | (+)-JQ1 c   | 15.71 | 6   |
| TMEM176   | 28959  | Leukemia, MESH:D015470 | Calcitriol  | 15.71 | 15  |
| ABHD17C   | 58489  | Leukemia, MESH:D015470 | Dexameth    | 15.7  | 6   |
| AKT1      | 207    | Leukemia, MESH:D007948 | 2-(2-amin   | 15.7  | 3   |
| AMBP      | 259    | Leukemia, MESH:D015470 | Air Polluta | 15.7  | 19  |
| CHSY3     | 337876 | Leukemia, MESH:D015470 | Doxorubic   | 15.7  | 11  |
| CTIF      | 9811   | Leukemia, MESH:D015470 | Doxorubic   | 15.7  | 12  |
| FLRT1     | 23769  | Leukemia, MESH:D015470 | Dronabinc   | 15.7  | 7   |
| FOCAD     | 54914  | Leukemia, MESH:D015470 | Calcitriol  | 15.7  | 12  |
| GSTM5     | 2949   | Leukemia, MESH:D015470 | Arsenic Tr  | 15.7  | 22  |
| LMBR1L    | 55716  | Leukemia, MESH:D015470 | Dexameth    | 15.7  | 7   |
| MTMR12    | 54545  | Leukemia, MESH:D015470 | Dexameth    | 15.7  | 11  |
| NOL3      | 8996   | Leukemia, MESH:D015470 | Arsenic Tr  | 15.7  | 21  |
| PDZRN4    | 29951  | Leukemia, MESH:D015473 | Arsenic Tr  | 15.7  | 260 |
| PSMG3     | 84262  | Leukemia, MESH:D015470 | Doxorubic   | 15.7  | 13  |
| STK33     | 65975  | Leukemia, MESH:D015470 | Doxorubic   | 15.7  | 14  |
| TUBGCP6   | 85378  | Leukemia, MESH:D015470 | Dexameth    | 15.7  | 7   |
| UFC1      | 51506  | Leukemia, MESH:D015470 | Dexameth    | 15.7  | 11  |
| ULK3      | 25989  | Leukemia, MESH:D015470 | Dexameth    | 15.7  | 7   |
| ACAT1     | 38     | Leukemia, MESH:D015473 | alpha-Toc   | 15.69 | 157 |
| CORO1A    | 11151  | Leukemia, MESH:D015470 | Arsenic Tr  | 15.69 | 18  |
| HECTD3    | 79654  | Leukemia, MESH:D015470 | Doxorubic   | 15.69 | 12  |
| PNN       | 5411   | Leukemia, MESH:D015473 | arsenite G  | 15.69 | 158 |
| SORD      | 6652   | Leukemia, MESH:D015473 | arsenite B  | 15.69 | 156 |
| TNF       | 7124   | Leukemia, MESH:D007948 | 2-(2-amin   | 15.69 | 4   |
| TRO       | 7216   | Leukemia, MESH:D015470 | Dexameth    | 15.69 | 12  |
| ZNF189    | 7743   | Leukemia, MESH:D015473 | Dexameth    | 15.69 | 5   |
| ACO1      | 48     | Leukemia, MESH:D015473 | Arsenic Ar  | 15.68 | 263 |
| DEFA1     | 1667   | Leukemia, MESH:D015470 | Arsenic Tr  | 15.68 | 11  |
| DPP7      | 29952  | Leukemia, MESH:D015473 | Arsenic ar  | 15.68 | 14  |
| GALNT3    | 2591   | Leukemia, MESH:D007948 | 2-(2-amin   | 15.68 | 2   |
| GASK1B    | 51313  | Leukemia, MESH:D015473 | Calcitriol  | 15.68 | 153 |
| KMT2B     | 9757   | Leukemia, MESH:D004915 | Doxorubic   | 15.68 | 2   |
| NR3C2     | 4306   | Leukemia, MESH:D015470 | Dexameth    | 15.68 | 17  |
| NUP153    | 9972   | Leukemia, MESH:D007948 | 2-(2-amin   | 15.68 | 3   |
| PSMC3IP   | 29893  | Leukemia, MESH:D015473 | Calcitriol  | 15.68 | 155 |
| ROR1      | 4919   | Leukemia, MESH:D015473 | Arsenic Ca  | 15.68 | 154 |
| COL13A1   | 1305   | Leukemia, MESH:D015473 | Calcitriol  | 15.67 | 156 |
| FLOT1     | 10211  | Leukemia, MESH:D015473 | Dexameth    | 15.67 | 159 |
| ITPK1-AS1 | 319085 | Leukemia, MESH:D015470 | Gasoline M  | 15.67 | 7   |
| LARP1B    | 55132  | Leukemia, MESH:D015473 | Calcitriol  | 15.67 | 154 |

|          |        |                        |              |       |     |
|----------|--------|------------------------|--------------|-------|-----|
| MCCC2    | 64087  | Leukemia, MESH:D015473 | Dexameth     | 15.67 | 154 |
| NUAK2    | 81788  | Leukemia, MESH:D015473 | Arsenic Ar   | 15.67 | 159 |
| C1ORF74  | 148304 | Leukemia, MESH:D015470 | Dronabinc    | 15.66 | 8   |
| CAPNS1   | 826    | Leukemia, MESH:D015473 | Arsenic Tr   | 15.66 | 156 |
| CFTR     | 1080   | Leukemia, MESH:D015473 | alpha-Toc    | 15.66 | 160 |
| GSTT1    | 2952   | Leukemia, MESH:D015473 | alpha-Toc    | 15.66 | 161 |
| PEA15    | 8682   | Leukemia, MESH:D015473 | Arsenic De   | 15.66 | 156 |
| SEL1L3   | 23231  | Leukemia, MESH:D015473 | Arsenic Tr   | 15.66 | 262 |
| WEE1     | 7465   | Leukemia, MESH:D015473 | Arsenic Tr   | 15.66 | 266 |
| ZNF2     | 7549   | Leukemia, MESH:D015470 | Dexameth     | 15.66 | 9   |
| ATRN     | 8455   | Leukemia, MESH:D015470 | Benzene C    | 15.65 | 21  |
| GUSBP14  | 11039  | Leukemia, MESH:D015470 | Dexameth     | 15.65 | 7   |
| ING3     | 54556  | Leukemia, MESH:D015470 | Doxorubic    | 15.65 | 12  |
| KRT80    | 144501 | Leukemia, MESH:D015470 | Calcitriol C | 15.65 | 15  |
| PITX1    | 5307   | Leukemia, MESH:D004915 | Cytarabine   | 15.65 | 3   |
| APLP1    | 333    | Leukemia, MESH:D015470 | Doxorubic    | 15.64 | 23  |
| CES2     | 8824   | Leukemia, MESH:D015470 | Dexameth     | 15.64 | 25  |
| FCGRT    | 2217   | Leukemia, MESH:D015470 | Cyclophos    | 15.64 | 8   |
| GSS      | 2937   | Leukemia, MESH:D015470 | Dronabinc    | 15.64 | 13  |
| HECTD1   | 25831  | Leukemia, MESH:D015470 | Dexameth     | 15.64 | 8   |
| IGTP     | 16145  | Leukemia, MESH:D015470 | Benzene C    | 15.64 | 20  |
| KAT6A    | 7994   | Leukemia, MESH:D015470 | Benzene C    | 15.64 | 22  |
| KRT1-19D | 664718 | Leukemia, MESH:D015470 | Dexameth     | 15.64 | 5   |
| MAPT     | 4137   | Leukemia, MESH:D004915 | Daunorub     | 15.64 | 3   |
| MIR362   | 574030 | Leukemia, MESH:D015473 | Buthionine   | 15.64 | 155 |
| MIS18BP1 | 55320  | Leukemia, MESH:D015470 | Calcitriol C | 15.64 | 9   |
| MPZL1    | 9019   | Leukemia, MESH:D015473 | Cytarabine   | 15.64 | 153 |
| NAGA     | 4668   | Leukemia, MESH:D015470 | Air Polluta  | 15.64 | 8   |
| NDUFB3   | 4709   | Leukemia, MESH:D015470 | Doxorubic    | 15.64 | 13  |
| NLN      | 57486  | Leukemia, MESH:D015470 | Air Polluta  | 15.64 | 13  |
| NPM3     | 10360  | Leukemia, MESH:D015470 | Gasoline C   | 15.64 | 8   |
| PKD2     | 5311   | Leukemia, MESH:D015470 | Decitabine   | 15.64 | 20  |
| PMS2P5   | 5383   | Leukemia, MESH:D015470 | Arsenic Tr   | 15.64 | 12  |
| RCL1     | 10171  | Leukemia, MESH:D015470 | Air Polluta  | 15.64 | 18  |
| SRRT     | 51593  | Leukemia, MESH:D015470 | Arsenic Tr   | 15.64 | 15  |
| TFB1M    | 51106  | Leukemia, MESH:D015470 | Doxorubic    | 15.64 | 13  |
| TNRC6A   | 27327  | Leukemia, MESH:D015470 | Cytarabine   | 15.64 | 78  |
| ACOT13   | 55856  | Leukemia, MESH:D015470 | Decitabine   | 15.63 | 20  |
| ATP6V1C1 | 528    | Leukemia, MESH:D015470 | Air Polluta  | 15.63 | 12  |
| BMPR1A   | 657    | Leukemia, MESH:D015470 | Dexameth     | 15.63 | 8   |
| CHAC2    | 494143 | Leukemia, MESH:D015470 | Calcitriol C | 15.63 | 14  |
| EDN2     | 1907   | Leukemia, MESH:D015470 | Dexameth     | 15.63 | 10  |
| GPX1B    | 447895 | Leukemia, MESH:D015470 | Dronabinc    | 15.63 | 6   |
| ISL1     | 3670   | Leukemia, MESH:D015470 | Dexameth     | 15.63 | 9   |
| KRTAP2-3 | 730755 | Leukemia, MESH:D015470 | (+)-JQ1 c    | 15.63 | 6   |
| MLLT3    | 4300   | Leukemia, MESH:D015470 | Doxorubic    | 15.63 | 16  |
| NPNT     | 255743 | Leukemia, MESH:D015470 | Doxorubic    | 15.63 | 21  |
| PER1     | 5187   | Leukemia, MESH:D015473 | Arsenic De   | 15.63 | 153 |
| PKMYT1   | 9088   | Leukemia, MESH:D015473 | Arsenic Tr   | 15.63 | 261 |
| SFXN3    | 81855  | Leukemia, MESH:D015470 | Calcitriol C | 15.63 | 16  |
| SPRR1A   | 6698   | Leukemia, MESH:D015473 | Antimony     | 15.63 | 153 |
| ST3GAL2  | 6483   | Leukemia, MESH:D015470 | Arsenic Tr   | 15.63 | 18  |
| ST3GAL3  | 6487   | Leukemia, MESH:D015470 | Doxorubic    | 15.63 | 14  |
| SUV39H2  | 79723  | Leukemia, MESH:D015470 | Calcitriol C | 15.63 | 10  |
| TRIM14   | 9830   | Leukemia, MESH:D015470 | Doxorubic    | 15.63 | 13  |
| WDR12    | 55759  | Leukemia, MESH:D015470 | Arsenic Tr   | 15.63 | 13  |
| XRCC3    | 7517   | Leukemia, MESH:D015473 | Arsenic Ar   | 15.63 | 161 |
| ABCB8    | 11194  | Leukemia, MESH:D015470 | Daunorub     | 15.62 | 32  |

|          |          |                        |              |       |     |
|----------|----------|------------------------|--------------|-------|-----|
| FOXN3-A  | 400236   | Leukemia, MESH:D015470 | Dexameth     | 15.62 | 6   |
| GLIPR1L2 | 144321   | Leukemia, MESH:D015470 | Dexameth     | 15.62 | 5   |
| LRCH3    | 84859    | Leukemia, MESH:D015473 | Arsenic ar:  | 15.62 | 11  |
| N6AMT2   | 1E+08    | Leukemia, MESH:D015470 | Dexameth     | 15.62 | 6   |
| NOS2     | 4843     | Leukemia, MESH:D007948 | 2-(2-amin    | 15.62 | 3   |
| PDXDC2P  | 1.1E+08  | Leukemia, MESH:D015470 | Dexameth     | 15.62 | 5   |
| PRSS12   | 8492     | Leukemia, MESH:D015473 | Arsenic ca   | 15.62 | 155 |
| RAD51-A  | 1.01E+08 | Leukemia, MESH:D015470 | Dexameth     | 15.62 | 5   |
| RPS14    | 6208     | Leukemia, MESH:D015473 | arsenite Bi  | 15.62 | 155 |
| RPTOR    | 57521    | Leukemia, MESH:D015473 | Arsenic Cr   | 15.62 | 12  |
| SIVA1    | 10572    | Leukemia, MESH:D015473 | Arsenic ar:  | 15.62 | 12  |
| TTY14    | 83869    | Leukemia, MESH:D015470 | Dexameth     | 15.62 | 5   |
| ZSWIM9   | 374920   | Leukemia, MESH:D015470 | Dexameth     | 15.62 | 5   |
| CHRNA5   | 1138     | Leukemia, MESH:D015473 | Dexameth     | 15.61 | 153 |
| COA8     | 84334    | Leukemia, MESH:D015470 | Doxorubic    | 15.61 | 11  |
| DSG2     | 1829     | Leukemia, MESH:D015473 | Arsenic Tr   | 15.61 | 262 |
| DUSP14   | 11072    | Leukemia, MESH:D015473 | Arsenic ar:  | 15.61 | 156 |
| FAM107A  | 11170    | Leukemia, MESH:D015473 | Arsenic ar:  | 15.61 | 11  |
| KLHDC7B  | 113730   | Leukemia, MESH:D015473 | Calcitriol E | 15.61 | 5   |
| LINC0100 | 1E+08    | Leukemia, MESH:D015470 | Tobacco S    | 15.61 | 6   |
| MALT1    | 10892    | Leukemia, MESH:D015473 | Arsenic Ca   | 15.61 | 155 |
| MECOM    | 2122     | Leukemia, MESH:D015473 | Arsenic Ar   | 15.61 | 264 |
| OSM      | 5008     | Leukemia, MESH:D007948 | 2-(2-amin    | 15.61 | 1   |
| SPRR2G   | 6706     | Leukemia, MESH:D015473 | Arsenic Ar   | 15.61 | 261 |
| BMPER    | 168667   | Leukemia, MESH:D015473 | Arsenic De   | 15.6  | 155 |
| CABLES1  | 91768    | Leukemia, MESH:D015473 | arsenite D   | 15.6  | 155 |
| CEP72    | 55722    | Leukemia, MESH:D015473 | Arsenic Ca   | 15.6  | 155 |
| GNG7     | 2788     | Leukemia, MESH:D015473 | Arsenic ar:  | 15.6  | 157 |
| HES5     | 388585   | Leukemia, MESH:D015473 | 2-(2-chlor   | 15.6  | 264 |
| HYPK     | 25764    | Leukemia, MESH:D015470 | Dexameth     | 15.6  | 6   |
| KLF3     | 51274    | Leukemia, MESH:D015473 | Arsenic Tr   | 15.6  | 262 |
| PCDHGA8  | 9708     | Leukemia, MESH:D015470 | Doxorubic    | 15.6  | 11  |
| RPL32    | 6161     | Leukemia, MESH:D015473 | Arsenic ar:  | 15.6  | 13  |
| SRXN1    | 140809   | Leukemia, MESH:D004915 | Cytarabine   | 15.6  | 2   |
| TRAF4    | 9618     | Leukemia, MESH:D015473 | Arsenic Tr   | 15.6  | 261 |
| UCA1     | 652995   | Leukemia, MESH:D015473 | Arsenic Ca   | 15.6  | 155 |
| DNAI3    | 126820   | Leukemia, MESH:D015470 | Arsenic Tr   | 15.59 | 18  |
| FBXO38   | 81545    | Leukemia, MESH:D015470 | Air Polluta  | 15.59 | 13  |
| FUNDC1   | 139341   | Leukemia, MESH:D015470 | Chloroqui    | 15.59 | 11  |
| GGA1     | 26088    | Leukemia, MESH:D015470 | Arsenic Tr   | 15.59 | 31  |
| HYOU1    | 10525    | Leukemia, MESH:D015470 | Cyclophos    | 15.59 | 14  |
| ILKAP    | 80895    | Leukemia, MESH:D015470 | Arsenic Tr   | 15.59 | 38  |
| LEMD2    | 221496   | Leukemia, MESH:D015470 | Dexameth     | 15.59 | 20  |
| SETDB2   | 83852    | Leukemia, MESH:D015470 | Decitabine   | 15.59 | 21  |
| TTC13    | 79573    | Leukemia, MESH:D015470 | Doxorubic    | 15.59 | 11  |
| WDR82    | 80335    | Leukemia, MESH:D015473 | Arsenic Ar   | 15.59 | 263 |
| XAB2     | 56949    | Leukemia, MESH:D015470 | Decitabine   | 15.59 | 23  |
| ZDHH16   | 84287    | Leukemia, MESH:D015470 | Air Polluta  | 15.59 | 18  |
| CSNK1G3  | 1456     | Leukemia, MESH:D004915 | Doxorubic    | 15.58 | 2   |
| DIRAS3   | 9077     | Leukemia, MESH:D015470 | Arsenic Tr   | 15.58 | 18  |
| ESPN     | 83715    | Leukemia, MESH:D015470 | Androgen     | 15.58 | 14  |
| GLB1L2   | 89944    | Leukemia, MESH:D015470 | Benzene T    | 15.58 | 22  |
| GPATCH1  | 253635   | Leukemia, MESH:D015470 | Dexameth     | 15.58 | 11  |
| MSANTD4  | 84437    | Leukemia, MESH:D015470 | Dexameth     | 15.58 | 6   |
| PBX4     | 80714    | Leukemia, MESH:D015470 | Indometha    | 15.58 | 7   |
| SAMD13   | 148418   | Leukemia, MESH:D015470 | Calcitriol ( | 15.58 | 6   |
| SDS      | 10993    | Leukemia, MESH:D015473 | caffeic aci  | 15.58 | 153 |
| THBS4    | 7060     | Leukemia, MESH:D015473 | arsenite Et  | 15.58 | 153 |



|          |        |                        |              |       |     |
|----------|--------|------------------------|--------------|-------|-----|
| TMEM192  | 201931 | Leukemia, MESH:D015470 | Doxorubic    | 15.58 | 11  |
| TUBG2    | 27175  | Leukemia, MESH:D015470 | Arsenic Tr   | 15.58 | 25  |
| UNC5B    | 219699 | Leukemia, MESH:D015470 | Dexameth     | 15.58 | 10  |
| ATG101   | 60673  | Leukemia, MESH:D015470 | Dronabinc    | 15.57 | 8   |
| ATMIN    | 23300  | Leukemia, MESH:D015470 | Doxorubic    | 15.57 | 13  |
| CCDC148  | 130940 | Leukemia, MESH:D015470 | Doxorubic    | 15.57 | 11  |
| CINP     | 51550  | Leukemia, MESH:D015470 | Dexameth     | 15.57 | 11  |
| CNPY1    | 285888 | Leukemia, MESH:D015470 | Dexameth     | 15.57 | 6   |
| FBXO43   | 286151 | Leukemia, MESH:D015470 | Pentachlo    | 15.57 | 7   |
| GTF2IRD2 | 84163  | Leukemia, MESH:D015470 | Dexameth     | 15.57 | 6   |
| KIRREL2  | 84063  | Leukemia, MESH:D015470 | Dronabinc    | 15.57 | 8   |
| KLHL31   | 401265 | Leukemia, MESH:D015470 | Doxorubic    | 15.57 | 11  |
| LRWD1    | 222229 | Leukemia, MESH:D015470 | Dexameth     | 15.57 | 7   |
| MYL2     | 4633   | Leukemia, MESH:D015470 | Azacitidine  | 15.57 | 24  |
| NR2C2AP  | 126382 | Leukemia, MESH:D015470 | Calcitriol[( | 15.57 | 7   |
| SYS1     | 90196  | Leukemia, MESH:D015470 | Doxorubic    | 15.57 | 13  |
| TMCO3    | 55002  | Leukemia, MESH:D015470 | Calcitriol[E | 15.57 | 7   |
| TTLL11   | 158135 | Leukemia, MESH:D015470 | Dexameth     | 15.57 | 11  |
| TYW3     | 127253 | Leukemia, MESH:D015470 | Arsenic Tr   | 15.57 | 17  |
| USE1     | 55850  | Leukemia, MESH:D015470 | Doxorubic    | 15.57 | 13  |
| VAV1     | 7409   | Leukemia, MESH:D015470 | Air Polluta  | 15.57 | 19  |
| ZNF618   | 114991 | Leukemia, MESH:D015470 | (+)-JQ1 c    | 15.57 | 7   |
| ACAD9    | 28976  | Leukemia, MESH:D015473 | Arsenic[ar   | 15.56 | 12  |
| ALOX5    | 240    | Leukemia, MESH:D015473 | Arsenic[Ca   | 15.56 | 159 |
| APPL2    | 55198  | Leukemia, MESH:D015470 | Air Polluta  | 15.56 | 13  |
| ATP11A   | 23250  | Leukemia, MESH:D015470 | Doxorubic    | 15.56 | 14  |
| BIRC3    | 330    | Leukemia, MESH:D004915 | Doxorubic    | 15.56 | 3   |
| COX8A    | 1351   | Leukemia, MESH:D015470 | Bortezomi    | 15.56 | 15  |
| CTSA     | 5476   | Leukemia, MESH:D015473 | Arsenic Tr   | 15.56 | 264 |
| DERL3    | 91319  | Leukemia, MESH:D015470 | Calcitriol[E | 15.56 | 9   |
| DYRK3    | 8444   | Leukemia, MESH:D015470 | Dronabinc    | 15.56 | 11  |
| IRF2     | 3660   | Leukemia, MESH:D015470 | Air Polluta  | 15.56 | 13  |
| PRMT3    | 10196  | Leukemia, MESH:D015470 | Dexameth     | 15.56 | 14  |
| PSPC1    | 55269  | Leukemia, MESH:D015473 | Arsenic Tr   | 15.56 | 155 |
| TBC1D2   | 55357  | Leukemia, MESH:D015470 | Calcitriol[C | 15.56 | 9   |
| UCP2     | 7351   | Leukemia, MESH:D004915 | Doxorubic    | 15.56 | 3   |
| ZNF430   | 80264  | Leukemia, MESH:D015470 | Dexameth     | 15.56 | 7   |
| ZNF622   | 90441  | Leukemia, MESH:D015470 | Dexameth     | 15.56 | 7   |
| AGER     | 177    | Leukemia, MESH:D015473 | Arsenic[Ca   | 15.55 | 12  |
| CD4      | 920    | Leukemia, MESH:D015473 | Dexameth     | 15.55 | 155 |
| CFB      | 629    | Leukemia, MESH:D015473 | Antimony     | 15.55 | 263 |
| COX7A1   | 1346   | Leukemia, MESH:D015470 | Dexameth     | 15.55 | 13  |
| GALNT6   | 11226  | Leukemia, MESH:D015470 | Calcitriol[E | 15.55 | 13  |
| HACD1    | 9200   | Leukemia, MESH:D015470 | Dexameth     | 15.55 | 13  |
| IGF1R    | 3480   | Leukemia, MESH:D004915 | Doxorubic    | 15.55 | 3   |
| MBOAT1   | 154141 | Leukemia, MESH:D015470 | Dronabinc    | 15.55 | 8   |
| MTCH2    | 23788  | Leukemia, MESH:D015470 | Dexameth     | 15.55 | 14  |
| NDUFB8   | 4714   | Leukemia, MESH:D015473 | Arsenic[ar   | 15.55 | 13  |
| NEIL3    | 55247  | Leukemia, MESH:D015473 | Calcitriol[M | 15.55 | 155 |
| NUDT4    | 11163  | Leukemia, MESH:D015473 | Arsenic[Ar   | 15.55 | 261 |
| PCCA     | 5095   | Leukemia, MESH:D015473 | Arsenic Tr   | 15.55 | 262 |
| PMM2     | 5373   | Leukemia, MESH:D015470 | Arsenic Tr   | 15.55 | 19  |
| PRAG1    | 157285 | Leukemia, MESH:D015470 | Dexameth     | 15.55 | 12  |
| PRKN     | 5071   | Leukemia, MESH:D015473 | Arsenic[Ar   | 15.55 | 264 |
| PSME3    | 10197  | Leukemia, MESH:D015473 | Arsenic Tr   | 15.55 | 156 |
| RMDN2    | 151393 | Leukemia, MESH:D015470 | Arsenic Tr   | 15.55 | 13  |
| SERPINB1 | 66222  | Leukemia, MESH:D015470 | Dexameth     | 15.55 | 9   |
| SRR      | 63826  | Leukemia, MESH:D015473 | Arsenic Tr   | 15.55 | 261 |

|          |        |                        |             |       |     |
|----------|--------|------------------------|-------------|-------|-----|
| SUCLG1   | 8802   | Leukemia, MESH:D015473 | Arsenic ars | 15.55 | 13  |
| TBC1D15  | 64786  | Leukemia, MESH:D015470 | Arsenic Tr  | 15.55 | 13  |
| VAPB     | 9217   | Leukemia, MESH:D015470 | Doxorubic   | 15.55 | 14  |
| ADRB2    | 154    | Leukemia, MESH:D015473 | arsenite C  | 15.54 | 156 |
| ATP6V0D1 | 9114   | Leukemia, MESH:D015473 | Arsenic Ar  | 15.54 | 263 |
| FXN      | 2395   | Leukemia, MESH:D015473 | arsenite D  | 15.54 | 157 |
| MIR576   | 693161 | Leukemia, MESH:D015473 | Arsenic Re  | 15.54 | 10  |
| SPINK2   | 6691   | Leukemia, MESH:D015473 | Arsenic Tr  | 15.54 | 262 |
| SRR      | 63826  | Leukemia, MESH:D007948 | Arsenic Tr  | 15.54 | 3   |
| STRA6    | 64220  | Leukemia, MESH:D015473 | Arsenic Tr  | 15.54 | 262 |
| MNT      | 4335   | Leukemia, MESH:D004915 | Doxorubic   | 15.53 | 2   |
| SP110    | 3431   | Leukemia, MESH:D004915 | Daunorub    | 15.53 | 2   |
| ST6GAL1  | 6480   | Leukemia, MESH:D015470 | Decitabine  | 15.53 | 16  |
| TLR4     | 7099   | Leukemia, MESH:D007948 | 2-(2-amin   | 15.53 | 3   |
| CLTB     | 1212   | Leukemia, MESH:D015473 | Arsenic Tr  | 15.52 | 264 |
| DAAM1    | 23002  | Leukemia, MESH:D015473 | Arsenic ars | 15.52 | 159 |
| IFT43    | 112752 | Leukemia, MESH:D015473 | arsenite D  | 15.52 | 8   |
| LEP      | 3952   | Leukemia, MESH:D007948 | 2-(2-amin   | 15.52 | 3   |
| MAT2AL   | 678634 | Leukemia, MESH:D015473 | Dexameth    | 15.52 | 4   |
| SMOC2    | 64094  | Leukemia, MESH:D015473 | Cytarabine  | 15.52 | 155 |
| CDC34    | 997    | Leukemia, MESH:D007948 | Arsenic Tr  | 15.51 | 3   |
| CIITA    | 4261   | Leukemia, MESH:D015473 | Arsenic Ar  | 15.51 | 267 |
| CX3CL1   | 6376   | Leukemia, MESH:D015473 | Arsenic Tr  | 15.51 | 263 |
| FLRT2    | 23768  | Leukemia, MESH:D015473 | arsenite C  | 15.51 | 16  |
| GTF3C3   | 9330   | Leukemia, MESH:D015473 | arsenite Re | 15.51 | 155 |
| NUAK1    | 9891   | Leukemia, MESH:D015473 | Arsenic Ar  | 15.51 | 263 |
| PPARGC1  | 10891  | Leukemia, MESH:D007948 | Arsenic Tr  | 15.51 | 3   |
| YES1     | 7525   | Leukemia, MESH:D015470 | Arsenic Tr  | 15.51 | 13  |
| AUH      | 549    | Leukemia, MESH:D015473 | Dexameth    | 15.5  | 7   |
| CDC34    | 997    | Leukemia, MESH:D015473 | Arsenic Tr  | 15.5  | 155 |
| CDKN1B   | 1027   | Leukemia, MESH:D007948 | 2-(2-amin   | 15.5  | 3   |
| HEPH     | 9843   | Leukemia, MESH:D015473 | Dasatinib   | 15.5  | 7   |
| INS      | 3630   | Leukemia, MESH:D007948 | 2-(2-amin   | 15.5  | 2   |
| MINDY4   | 84182  | Leukemia, MESH:D015473 | Arsenic Cy  | 15.5  | 157 |
| MIR494   | 574452 | Leukemia, MESH:D015470 | Benzene C   | 15.5  | 21  |
| STEAP3   | 55240  | Leukemia, MESH:D015473 | Arsenic Ca  | 15.5  | 155 |
| TFAP2C   | 7022   | Leukemia, MESH:D015473 | Arsenic Tr  | 15.5  | 156 |
| TMEM158  | 25907  | Leukemia, MESH:D015473 | Arsenic Ar  | 15.5  | 262 |
| UBL3     | 5412   | Leukemia, MESH:D004915 | Cytarabine  | 15.5  | 2   |
| COMMD1   | 150684 | Leukemia, MESH:D015470 | Clioquinol  | 15.49 | 12  |
| EPB41L5  | 57669  | Leukemia, MESH:D015473 | Arsenic ars | 15.49 | 159 |
| GJC1     | 10052  | Leukemia, MESH:D015470 | Chloroqui   | 15.49 | 17  |
| KCNB1    | 3745   | Leukemia, MESH:D015473 | Arsenic De  | 15.49 | 156 |
| LPGAT1   | 9926   | Leukemia, MESH:D015473 | Calcitriol  | 15.49 | 156 |
| MUC2     | 4583   | Leukemia, MESH:D015473 | Arsenic Ge  | 15.49 | 155 |
| RRP12    | 23223  | Leukemia, MESH:D015473 | Dexameth    | 15.49 | 153 |
| SRF      | 6722   | Leukemia, MESH:D015470 | Arsenic Tr  | 15.49 | 17  |
| CDK13    | 8621   | Leukemia, MESH:D004915 | Doxorubic   | 15.48 | 2   |
| COX1     | 4512   | Leukemia, MESH:D015473 | Arsenic Tr  | 15.48 | 155 |
| EN1      | 2019   | Leukemia, MESH:D015473 | arsenite D  | 15.48 | 155 |
| IL36A    | 27179  | Leukemia, MESH:D015473 | Arsenic Ar  | 15.48 | 160 |
| NACA     | 4666   | Leukemia, MESH:D015470 | Arsenic Tr  | 15.48 | 23  |
| NRTN     | 4902   | Leukemia, MESH:D015470 | Arsenic Tr  | 15.48 | 19  |
| NTF3     | 4908   | Leukemia, MESH:D015470 | Benzene C   | 15.48 | 32  |
| PAX9     | 5083   | Leukemia, MESH:D015473 | Arsenic Tr  | 15.48 | 261 |
| PCBP2    | 5094   | Leukemia, MESH:D015470 | Arsenic Tr  | 15.48 | 22  |
| PPP1R3A  | 5506   | Leukemia, MESH:D015473 | arsenite D  | 15.48 | 157 |
| RASSF5   | 83593  | Leukemia, MESH:D015470 | Doxorubic   | 15.48 | 14  |

|          |        |                        |              |       |     |
|----------|--------|------------------------|--------------|-------|-----|
| RXRG     | 6258   | Leukemia, MESH:D015470 | Alitretinoin | 15.48 | 17  |
| SELENOM  | 140606 | Leukemia, MESH:D015470 | Cytarabine   | 15.48 | 79  |
| SELP     | 6403   | Leukemia, MESH:D015470 | Arsenic Tr   | 15.48 | 17  |
| SREBF1   | 6720   | Leukemia, MESH:D007948 | Arsenic Tr   | 15.48 | 3   |
| TPK1     | 27010  | Leukemia, MESH:D004915 | Cytarabine   | 15.48 | 2   |
| TRIP6    | 7205   | Leukemia, MESH:D004915 | Doxorubic    | 15.48 | 2   |
| TUG1     | 55000  | Leukemia, MESH:D004915 | Doxorubic    | 15.48 | 2   |
| YY1      | 7528   | Leukemia, MESH:D015473 | alpha-Toc    | 15.48 | 261 |
| CHRNA6   | 8973   | Leukemia, MESH:D015470 | Arsenic Tr   | 15.47 | 14  |
| CHSY1    | 22856  | Leukemia, MESH:D015470 | Dexameth     | 15.47 | 13  |
| CLSTN3   | 9746   | Leukemia, MESH:D015470 | Dexameth     | 15.47 | 9   |
| COL1A2   | 1278   | Leukemia, MESH:D004915 | Cytarabine   | 15.47 | 3   |
| COL4A3   | 1285   | Leukemia, MESH:D015470 | Doxorubic    | 15.47 | 14  |
| EMILIN2  | 84034  | Leukemia, MESH:D015470 | Dexameth     | 15.47 | 13  |
| FHOD3    | 80206  | Leukemia, MESH:D015470 | Calcitriol C | 15.47 | 13  |
| GNAL     | 2774   | Leukemia, MESH:D015470 | Arsenic Tr   | 15.47 | 13  |
| KEAP1A   | 321837 | Leukemia, MESH:D015473 | Arsenic Ar   | 15.47 | 158 |
| MIRLET7C | 406885 | Leukemia, MESH:D015473 | arsenite Re  | 15.47 | 156 |
| PJA1     | 64219  | Leukemia, MESH:D015470 | Azacitidine  | 15.47 | 20  |
| PTPRM    | 5797   | Leukemia, MESH:D015470 | Calcitriol C | 15.47 | 13  |
| PTPRS    | 5802   | Leukemia, MESH:D015470 | Doxorubic    | 15.47 | 13  |
| TIMM17A  | 10440  | Leukemia, MESH:D015470 | Dexameth     | 15.47 | 10  |
| TLCD4B   | 449652 | Leukemia, MESH:D015473 | Dexameth     | 15.47 | 152 |
| TSPAN5   | 10098  | Leukemia, MESH:D015470 | Calcitriol C | 15.47 | 13  |
| UBE3D    | 90025  | Leukemia, MESH:D015473 | Calcitriol C | 15.47 | 153 |
| ANPEPB.1 | 322533 | Leukemia, MESH:D015470 | Alitretinoin | 15.46 | 7   |
| FAAP20   | 199990 | Leukemia, MESH:D015470 | Arsenic Tr   | 15.46 | 13  |
| FLVCR1   | 28982  | Leukemia, MESH:D015470 | Air Polluta  | 15.46 | 11  |
| GSTM1    | 2944   | Leukemia, MESH:D007948 | Arsenic Tr   | 15.46 | 4   |
| MYL4     | 4635   | Leukemia, MESH:D015473 | Arsenic Ar   | 15.46 | 167 |
| MZT1     | 440145 | Leukemia, MESH:D015470 | Calcitriol C | 15.46 | 9   |
| PAN3     | 255967 | Leukemia, MESH:D015470 | Dronabinc    | 15.46 | 7   |
| PARD3    | 56288  | Leukemia, MESH:D015473 | Arsenic ar:  | 15.46 | 155 |
| PDLIM3   | 27295  | Leukemia, MESH:D015473 | Arsenic Cy   | 15.46 | 19  |
| PRAME    | 23532  | Leukemia, MESH:D015470 | Alitretinoin | 15.46 | 12  |
| RPUSD2   | 27079  | Leukemia, MESH:D015470 | Doxorubic    | 15.46 | 12  |
| ABL2     | 27     | Leukemia, MESH:D015473 | Arsenic ar:  | 15.45 | 11  |
| AHI1     | 54806  | Leukemia, MESH:D004915 | Cytarabine   | 15.45 | 2   |
| BAIAP3   | 8938   | Leukemia, MESH:D015470 | (+)-JQ1 co   | 15.45 | 6   |
| CAND2    | 23066  | Leukemia, MESH:D015470 | Decitabine   | 15.45 | 18  |
| CHAMP1   | 283489 | Leukemia, MESH:D015470 | Cyclophos    | 15.45 | 11  |
| DUS1L    | 64118  | Leukemia, MESH:D015470 | Gasoline P   | 15.45 | 7   |
| ENTPD6   | 955    | Leukemia, MESH:D015473 | Arsenic De   | 15.45 | 155 |
| FEM1A    | 55527  | Leukemia, MESH:D015470 | Dexameth     | 15.45 | 8   |
| GNGT1    | 2792   | Leukemia, MESH:D015470 | Dronabinc    | 15.45 | 7   |
| HSD17B4  | 3295   | Leukemia, MESH:D015473 | Arsenic Ar   | 15.45 | 160 |
| L3MBTL2  | 83746  | Leukemia, MESH:D015470 | Dexameth     | 15.45 | 6   |
| MPP3     | 4356   | Leukemia, MESH:D015470 | Paclitaxel I | 15.45 | 7   |
| PEAK1    | 79834  | Leukemia, MESH:D015470 | Benzene C    | 15.45 | 25  |
| PIR      | 8544   | Leukemia, MESH:D015473 | Antimony     | 15.45 | 262 |
| TDP2     | 51567  | Leukemia, MESH:D015470 | Benzene C    | 15.45 | 26  |
| WRNIP1   | 56897  | Leukemia, MESH:D015470 | Dexameth     | 15.45 | 10  |
| ZC3H14   | 79882  | Leukemia, MESH:D015470 | Air Polluta  | 15.45 | 13  |
| ADORA1   | 134    | Leukemia, MESH:D015470 | Calcitriol C | 15.44 | 15  |
| ALDOAA   | 336425 | Leukemia, MESH:D015470 | Alitretinoin | 15.44 | 7   |
| APBA3    | 9546   | Leukemia, MESH:D015470 | Decitabine   | 15.44 | 19  |
| APRT     | 353    | Leukemia, MESH:D015473 | arsenite D   | 15.44 | 8   |
| ATP5PD   | 10476  | Leukemia, MESH:D015470 | Doxorubic    | 15.44 | 11  |

|          |        |                        |              |       |     |
|----------|--------|------------------------|--------------|-------|-----|
| BZW1     | 9689   | Leukemia, MESH:D015473 | Arsenic Tr   | 15.44 | 261 |
| CNN2     | 1265   | Leukemia, MESH:D015473 | Calcitriol C | 15.44 | 154 |
| ELAC1    | 55520  | Leukemia, MESH:D015470 | Dexameth     | 15.44 | 6   |
| FHIP2A   | 57700  | Leukemia, MESH:D015470 | Doxorubic    | 15.44 | 13  |
| IFT46    | 56912  | Leukemia, MESH:D015470 | Dexameth     | 15.44 | 12  |
| IGHG1    | 3500   | Leukemia, MESH:D015473 | Arsenic Tr   | 15.44 | 263 |
| MSTO1    | 55154  | Leukemia, MESH:D015470 | Dexameth     | 15.44 | 8   |
| MYT1L    | 23040  | Leukemia, MESH:D015470 | Arsenic Tr   | 15.44 | 13  |
| NFATC3   | 4775   | Leukemia, MESH:D015473 | Arsenic Ar   | 15.44 | 159 |
| PSEN2    | 5664   | Leukemia, MESH:D015473 | Arsenic De   | 15.44 | 11  |
| RNFT1    | 51136  | Leukemia, MESH:D015470 | Calcitriol C | 15.44 | 11  |
| SAV1     | 60485  | Leukemia, MESH:D015470 | Arsenic Tr   | 15.44 | 12  |
| SF3B6    | 51639  | Leukemia, MESH:D015470 | Doxorubic    | 15.44 | 13  |
| SHISA2   | 387914 | Leukemia, MESH:D015473 | Arsenic Ar   | 15.44 | 265 |
| TNRC6C   | 57690  | Leukemia, MESH:D015470 | Doxorubic    | 15.44 | 12  |
| ZDHHC3   | 51304  | Leukemia, MESH:D015470 | Dexameth     | 15.44 | 12  |
| ZNF521   | 25925  | Leukemia, MESH:D015470 | Dexameth     | 15.44 | 12  |
| ASAP1    | 50807  | Leukemia, MESH:D015473 | Arsenic ar:  | 15.43 | 159 |
| BCL2L11  | 10018  | Leukemia, MESH:D015473 | Arsenic Tr   | 15.43 | 262 |
| KRT32    | 3882   | Leukemia, MESH:D015470 | Azacitidine  | 15.43 | 8   |
| LYRM7    | 90624  | Leukemia, MESH:D015470 | Dexameth     | 15.43 | 7   |
| MBNL1    | 4154   | Leukemia, MESH:D015473 | arsenite D   | 15.43 | 155 |
| PHF3     | 23469  | Leukemia, MESH:D004915 | Doxorubic    | 15.43 | 2   |
| PSMD14   | 10213  | Leukemia, MESH:D015473 | Arsenic De   | 15.43 | 158 |
| RASGRP3  | 25780  | Leukemia, MESH:D015473 | Arsenic De   | 15.43 | 155 |
| SNAPC4   | 6621   | Leukemia, MESH:D015470 | Dexameth     | 15.43 | 11  |
| TRIB3    | 57761  | Leukemia, MESH:D004915 | Doxorubic    | 15.43 | 3   |
| YIPF6    | 286451 | Leukemia, MESH:D015470 | Dexameth     | 15.43 | 11  |
| AIF1     | 199    | Leukemia, MESH:D015473 | Arsenic Tr   | 15.42 | 266 |
| IRX4     | 50805  | Leukemia, MESH:D004915 | Daunorub     | 15.42 | 2   |
| JAG1     | 182    | Leukemia, MESH:D015473 | arsenite D   | 15.42 | 153 |
| MYOM2    | 9172   | Leukemia, MESH:D004915 | Daunorub     | 15.42 | 2   |
| PRKACB   | 5567   | Leukemia, MESH:D015470 | Dexameth     | 15.42 | 15  |
| CCR3     | 1232   | Leukemia, MESH:D015470 | Alitretinoin | 15.41 | 15  |
| CD83     | 9308   | Leukemia, MESH:D015473 | Arsenic De   | 15.41 | 156 |
| CEBPA    | 1050   | Leukemia, MESH:D004915 | Doxorubic    | 15.41 | 3   |
| COL15A1  | 1306   | Leukemia, MESH:D015473 | Dexameth     | 15.41 | 7   |
| CTRB1    | 1504   | Leukemia, MESH:D015470 | Chloroqui    | 15.41 | 7   |
| GCK      | 2645   | Leukemia, MESH:D015473 | Arsenic Ar   | 15.41 | 264 |
| HTRA3    | 94031  | Leukemia, MESH:D015470 | Arsenic Tr   | 15.41 | 22  |
| ITM2C    | 81618  | Leukemia, MESH:D004915 | Cytarabine   | 15.41 | 3   |
| KIAA1671 | 85379  | Leukemia, MESH:D015473 | arsenite Ci  | 15.41 | 15  |
| LPAR3    | 23566  | Leukemia, MESH:D015470 | Ethylnitros  | 15.41 | 9   |
| PRDX6    | 9588   | Leukemia, MESH:D015473 | Arsenic Ca   | 15.41 | 159 |
| RPL37    | 6167   | Leukemia, MESH:D015470 | Arsenic Tr   | 15.41 | 30  |
| SCN1A    | 6323   | Leukemia, MESH:D015470 | Doxorubic    | 15.41 | 13  |
| SFTPC    | 6440   | Leukemia, MESH:D015470 | Dexameth     | 15.41 | 11  |
| SLC31A2  | 1318   | Leukemia, MESH:D015470 | Calcitriol C | 15.41 | 11  |
| CD99L2   | 83692  | Leukemia, MESH:D015470 | Dexameth     | 15.4  | 12  |
| DPP9     | 91039  | Leukemia, MESH:D015470 | Dexameth     | 15.4  | 13  |
| F3       | 2152   | Leukemia, MESH:D004915 | Daunorub     | 15.4  | 3   |
| FAM149A  | 25854  | Leukemia, MESH:D015470 | Dexameth     | 15.4  | 8   |
| GMPS     | 8833   | Leukemia, MESH:D015470 | Air Polluta  | 15.4  | 14  |
| GPM6A    | 2823   | Leukemia, MESH:D015473 | Arsenic Tr   | 15.4  | 164 |
| HAO1     | 54363  | Leukemia, MESH:D015470 | Dexameth     | 15.4  | 8   |
| HLCS     | 3141   | Leukemia, MESH:D015470 | Decitabine   | 15.4  | 15  |
| HS3ST3B1 | 9953   | Leukemia, MESH:D015470 | Doxorubic    | 15.4  | 13  |
| IKZF1    | 10320  | Leukemia, MESH:D015473 | Calcitriol C | 15.4  | 157 |

|          |        |                        |              |       |     |
|----------|--------|------------------------|--------------|-------|-----|
| INTS6    | 26512  | Leukemia, MESH:D015470 | Arsenic Tr   | 15.4  | 16  |
| IPO7     | 10527  | Leukemia, MESH:D015470 | Calcitriol C | 15.4  | 7   |
| ITGB7    | 3695   | Leukemia, MESH:D015470 | Arsenic Tr   | 15.4  | 17  |
| KPNA4    | 3840   | Leukemia, MESH:D015470 | Calcitriol C | 15.4  | 13  |
| MAST4    | 375449 | Leukemia, MESH:D015470 | Calcitriol C | 15.4  | 8   |
| MYCL     | 4610   | Leukemia, MESH:D015470 | Calcitriol M | 15.4  | 9   |
| OTX2     | 5015   | Leukemia, MESH:D015470 | Dexameth     | 15.4  | 8   |
| SATB1    | 6304   | Leukemia, MESH:D015473 | Arsenic Tr   | 15.4  | 260 |
| SEMA3F   | 6405   | Leukemia, MESH:D015470 | Calcitriol C | 15.4  | 7   |
| SGO1     | 151648 | Leukemia, MESH:D015473 | Calcitriol C | 15.4  | 155 |
| SIRPB1   | 10326  | Leukemia, MESH:D015473 | arsenite M   | 15.4  | 152 |
| SLC5A6   | 8884   | Leukemia, MESH:D015470 | Arsenic Tr   | 15.4  | 16  |
| STEAP2   | 261729 | Leukemia, MESH:D015470 | Air Polluta  | 15.4  | 12  |
| TIMM9    | 26520  | Leukemia, MESH:D015470 | Dexameth     | 15.4  | 13  |
| ZNF875   | 284459 | Leukemia, MESH:D015470 | Bortezomi    | 15.4  | 6   |
| ACTN2    | 88     | Leukemia, MESH:D015473 | arsenite D   | 15.39 | 155 |
| AGL      | 178    | Leukemia, MESH:D015473 | Arsenic Ar   | 15.39 | 264 |
| ANXA11   | 311    | Leukemia, MESH:D015473 | Arsenic Tr   | 15.39 | 259 |
| CD48     | 962    | Leukemia, MESH:D015473 | Genistein I  | 15.39 | 153 |
| CYP1A1   | 1543   | Leukemia, MESH:D007948 | 2-(2-amin    | 15.39 | 3   |
| DAXX     | 1616   | Leukemia, MESH:D007948 | 2-(2-amin    | 15.39 | 3   |
| FAM114A  | 92689  | Leukemia, MESH:D015470 | Dexameth     | 15.39 | 12  |
| MIR99AH  | 388815 | Leukemia, MESH:D015473 | arsenite C   | 15.39 | 156 |
| OMD      | 4958   | Leukemia, MESH:D015470 | Dexameth     | 15.39 | 13  |
| RBM4     | 5936   | Leukemia, MESH:D004915 | Doxorubic    | 15.39 | 2   |
| SERP1    | 27230  | Leukemia, MESH:D015470 | Dexameth     | 15.39 | 13  |
| SFTP8    | 6439   | Leukemia, MESH:D015473 | Calcitriol C | 15.39 | 154 |
| SLC43A2  | 124935 | Leukemia, MESH:D015470 | Dexameth     | 15.39 | 13  |
| TENM4    | 26011  | Leukemia, MESH:D015470 | Dexameth     | 15.39 | 12  |
| VAMP1    | 6843   | Leukemia, MESH:D015470 | Arsenic Tr   | 15.39 | 13  |
| CP       | 1356   | Leukemia, MESH:D015473 | Arsenic Tr   | 15.38 | 262 |
| DDT      | 1652   | Leukemia, MESH:D015473 | Arsenic Tr   | 15.38 | 262 |
| DUSP3    | 1845   | Leukemia, MESH:D015473 | Arsenic M    | 15.38 | 157 |
| HIBADH   | 11112  | Leukemia, MESH:D015473 | Arsenic Tr   | 15.38 | 261 |
| IL24     | 11009  | Leukemia, MESH:D015473 | Arsenic Ar   | 15.38 | 265 |
| PSMA3    | 5684   | Leukemia, MESH:D015473 | Arsenic ar:  | 15.38 | 11  |
| SQOR     | 58472  | Leukemia, MESH:D015473 | Arsenic ar:  | 15.38 | 13  |
| SWSAP1   | 126074 | Leukemia, MESH:D015470 | Thalidomi    | 15.38 | 6   |
| THRA     | 7067   | Leukemia, MESH:D015473 | Dexameth     | 15.38 | 157 |
| YPEL2    | 388403 | Leukemia, MESH:D015473 | Arsenic ar:  | 15.38 | 158 |
| ZDHHC11  | 79844  | Leukemia, MESH:D015473 | Arsenic Et   | 15.38 | 154 |
| CASP3A   | 140621 | Leukemia, MESH:D015473 | Arsenic Ar   | 15.37 | 160 |
| CGREF1   | 10669  | Leukemia, MESH:D015473 | Etoposide    | 15.37 | 151 |
| LDB3     | 11155  | Leukemia, MESH:D004915 | Daunorub     | 15.37 | 2   |
| NEUROD4  | 58158  | Leukemia, MESH:D015470 | Hydroxyur    | 15.37 | 6   |
| NRAP     | 4892   | Leukemia, MESH:D004915 | Daunorub     | 15.37 | 2   |
| PIK3CD   | 5293   | Leukemia, MESH:D015470 | Benzene C    | 15.37 | 29  |
| PPARGC1I | 133522 | Leukemia, MESH:D015470 | Etoposide    | 15.37 | 17  |
| RBL2     | 5934   | Leukemia, MESH:D015470 | Calcitriol C | 15.37 | 16  |
| TGM1     | 7051   | Leukemia, MESH:D015470 | Alitretinoi  | 15.37 | 11  |
| TUBB2B   | 347733 | Leukemia, MESH:D015470 | Cyclophos    | 15.37 | 16  |
| WASHC1   | 1E+08  | Leukemia, MESH:D015470 | Doxorubic    | 15.37 | 9   |
| YAP1     | 10413  | Leukemia, MESH:D015470 | Dexameth     | 15.37 | 14  |
| ATP1A1A  | 64615  | Leukemia, MESH:D015470 | Dexameth     | 15.36 | 5   |
| C11ORF87 | 399947 | Leukemia, MESH:D015470 | Arsenic Tr   | 15.36 | 12  |
| C8ORF33  | 65265  | Leukemia, MESH:D015470 | Doxorubic    | 15.36 | 13  |
| EI24     | 9538   | Leukemia, MESH:D015473 | Daunorub     | 15.36 | 20  |
| FADD     | 8772   | Leukemia, MESH:D015473 | Cholesterc   | 15.36 | 154 |

|          |        |                            |              |       |     |
|----------|--------|----------------------------|--------------|-------|-----|
| KLK7     | 5650   | Leukemia, MESH:D015473     | Arsenic Ca   | 15.36 | 155 |
| MIR181C  | 406957 | Leukemia, MESH:D015473     | Arsenic Tr   | 15.36 | 261 |
| TFF3     | 7033   | Leukemia, MESH:D007948     | 2-(2-amin    | 15.36 | 3   |
| UBE3B    | 89910  | Leukemia, MESH:D015473     | arsenite D   | 15.36 | 6   |
| ZNF554   | 115196 | Leukemia, MESH:D015470     | Arsenic Tr   | 15.36 | 12  |
| ZNF706   | 51123  | Leukemia, MESH:D015473     | Arsenic De   | 15.36 | 154 |
| ZNF767P  | 79970  | Leukemia, MESH:D015470     | Dexameth     | 15.36 | 9   |
| CLU      | 1191   | Leukemia, MESH:D004915     | Doxorubic    | 15.35 | 3   |
| FBXO42   | 54455  | Leukemia, MESH:D015473     | arsenite D   | 15.35 | 6   |
| GPR83    | 10888  | Leukemia, MESH:D015470     | Cytarabine   | 15.35 | 75  |
| H2AZ1    | 3015   | Leukemia, MESH:D015473     | arsenite D   | 15.35 | 8   |
| INA      | 9118   | Leukemia, MESH:D015473     | arsenite C   | 15.35 | 156 |
| PSTK     | 118672 | Leukemia, MESH:D015473     | Arsenic Tr   | 15.35 | 262 |
| RUBCNL   | 80183  | Leukemia, MESH:D015473     | Calcitriol E | 15.35 | 153 |
| TIPARP   | 25976  | Leukemia, MESH:D015473     | Arsenic Tr   | 15.35 | 262 |
| ZNF626   | 199777 | Leukemia, MESH:D015470     | Doxorubic    | 15.35 | 11  |
| ZNF721   | 170960 | Leukemia, MESH:D015473     | Arsenic ars  | 15.35 | 10  |
| IDH1     | 3417   | Leukemia, MESH:D01marker/m | Arsenic Ar   | 15.34 | 266 |
| C16ORF91 | 283951 | Leukemia, MESH:D015470     | Doxorubic    | 15.34 | 10  |
| CYP51    | 13121  | Leukemia, MESH:D015473     | Arsenic De   | 15.34 | 158 |
| DENND1B  | 163486 | Leukemia, MESH:D004915     | Doxorubic    | 15.34 | 2   |
| FAM120A  | 158293 | Leukemia, MESH:D015470     | Doxorubic    | 15.34 | 10  |
| GAPDH    | 2597   | Leukemia, MESH:D004915     | Cytarabine   | 15.34 | 3   |
| GJA5     | 2702   | Leukemia, MESH:D015470     | Arsenic Tr   | 15.34 | 27  |
| GUSBP11  | 91316  | Leukemia, MESH:D015470     | Dexameth     | 15.34 | 5   |
| HOXB4    | 3214   | Leukemia, MESH:D015470     | Cytarabine   | 15.34 | 81  |
| IFNAR2   | 3455   | Leukemia, MESH:D015470     | Dexameth     | 15.34 | 10  |
| ISLR     | 3671   | Leukemia, MESH:D004915     | Doxorubic    | 15.34 | 2   |
| LRP4     | 4038   | Leukemia, MESH:D015473     | Arsenic Ar   | 15.34 | 262 |
| MAB21L2  | 10586  | Leukemia, MESH:D004915     | Cytarabine   | 15.34 | 2   |
| MAP4K5   | 11183  | Leukemia, MESH:D004915     | Doxorubic    | 15.34 | 2   |
| MZB1     | 51237  | Leukemia, MESH:D015470     | Air Polluta  | 15.34 | 9   |
| RHOBTB1  | 9886   | Leukemia, MESH:D015473     | Arsenic Ar   | 15.34 | 262 |
| SERTAD4- | 574036 | Leukemia, MESH:D015470     | (+)-JQ1 c    | 15.34 | 6   |
| SYT15    | 83849  | Leukemia, MESH:D015470     | Dasatinib    | 15.34 | 7   |
| TANK     | 10010  | Leukemia, MESH:D015473     | Arsenic Ar   | 15.34 | 264 |
| ZC2HC1A  | 51101  | Leukemia, MESH:D004915     | Doxorubic    | 15.34 | 2   |
| ZNF713   | 349075 | Leukemia, MESH:D015470     | Dexameth     | 15.34 | 5   |
| ABI1     | 10006  | Leukemia, MESH:D015470     | Bortezomi    | 15.33 | 14  |
| ACAN     | 176    | Leukemia, MESH:D015470     | Dasatinib    | 15.33 | 10  |
| AFF2     | 2334   | Leukemia, MESH:D015470     | Dronabinc    | 15.33 | 6   |
| AK2      | 204    | Leukemia, MESH:D015473     | arsenite D   | 15.33 | 8   |
| ARHGAP2  | 23092  | Leukemia, MESH:D015473     | Arsenic Ar   | 15.33 | 265 |
| ARHGAP4  | 23526  | Leukemia, MESH:D015470     | Decitabine   | 15.33 | 15  |
| ARID5A   | 10865  | Leukemia, MESH:D015470     | Dexameth     | 15.33 | 8   |
| C11ORF54 | 28970  | Leukemia, MESH:D015470     | Arsenic Tr   | 15.33 | 13  |
| CAMK2G   | 818    | Leukemia, MESH:D015473     | Arsenic Tr   | 15.33 | 262 |
| CASK     | 8573   | Leukemia, MESH:D015473     | Arsenic Tr   | 15.33 | 263 |
| CLIP4    | 79745  | Leukemia, MESH:D015470     | Bortezomi    | 15.33 | 9   |
| CYTOR    | 112597 | Leukemia, MESH:D015470     | Decitabine   | 15.33 | 17  |
| DLGAP4   | 22839  | Leukemia, MESH:D015470     | Arsenic Tr   | 15.33 | 19  |
| DNAJC9   | 23234  | Leukemia, MESH:D015470     | Air Polluta  | 15.33 | 20  |
| FOXN3    | 1112   | Leukemia, MESH:D015473     | Arsenic M    | 15.33 | 157 |
| MEP1A    | 4224   | Leukemia, MESH:D015470     | Arsenic Tr   | 15.33 | 15  |
| MVB12A   | 93343  | Leukemia, MESH:D015470     | Cytarabine   | 15.33 | 78  |
| MYOG     | 4656   | Leukemia, MESH:D015470     | Azacitidine  | 15.33 | 11  |
| NCF4     | 4689   | Leukemia, MESH:D015470     | Bortezomi    | 15.33 | 11  |
| PKD3     | 5165   | Leukemia, MESH:D015470     | Calcitriol E | 15.33 | 16  |

|          |        |                            |              |       |     |
|----------|--------|----------------------------|--------------|-------|-----|
| PHF23    | 79142  | Leukemia, MESH:D015470     | Air Polluta  | 15.33 | 8   |
| PHLDB2   | 90102  | Leukemia, MESH:D015473     | Arsenic Tr   | 15.33 | 155 |
| RER1     | 11079  | Leukemia, MESH:D015470     | Dexameth     | 15.33 | 11  |
| RNASET2  | 8635   | Leukemia, MESH:D015470     | Dronabinc    | 15.33 | 10  |
| SAMD9L   | 219285 | Leukemia, MESH:D015470     | Air Polluta  | 15.33 | 14  |
| SCGN     | 10590  | Leukemia, MESH:D015473     | Arsenic De   | 15.33 | 155 |
| SERP2    | 387923 | Leukemia, MESH:D015470     | Air Polluta  | 15.33 | 8   |
| SMIM10L2 | 644596 | Leukemia, MESH:D015470     | Doxorubic    | 15.33 | 11  |
| SYT11    | 23208  | Leukemia, MESH:D015470     | Benzoates    | 15.33 | 8   |
| TCERG1L  | 256536 | Leukemia, MESH:D015470     | Decitabine   | 15.33 | 13  |
| TLR6     | 10333  | Leukemia, MESH:D007948     | 2-(2-amin    | 15.33 | 1   |
| TLR7     | 51284  | Leukemia, MESH:D007948     | 2-(2-amin    | 15.33 | 1   |
| TTC19    | 54902  | Leukemia, MESH:D015470     | Benzene C    | 15.33 | 27  |
| UFSP2    | 55325  | Leukemia, MESH:D015470     | Air Polluta  | 15.33 | 7   |
| WASL     | 8976   | Leukemia, MESH:D015470     | Doxorubic    | 15.33 | 13  |
| ZMIZ1    | 57178  | Leukemia, MESH:D015473     | Arsenic ar:  | 15.33 | 156 |
| NUP98    | 4928   | Leukemia, MESH:D01marker/m | Dexameth     | 15.32 | 14  |
| ANAPC10  | 10393  | Leukemia, MESH:D015470     | Dexameth     | 15.32 | 7   |
| AP1AR    | 55435  | Leukemia, MESH:D015470     | Dronabinc    | 15.32 | 7   |
| APOLD1   | 81575  | Leukemia, MESH:D015470     | Dronabinc    | 15.32 | 11  |
| ARPC2    | 10109  | Leukemia, MESH:D015470     | Dexameth     | 15.32 | 13  |
| AVPR1A   | 552    | Leukemia, MESH:D015470     | Doxorubic    | 15.32 | 24  |
| BBS1     | 582    | Leukemia, MESH:D015470     | Dexameth     | 15.32 | 11  |
| BZW2     | 28969  | Leukemia, MESH:D015470     | Arsenic Tr   | 15.32 | 18  |
| CBLN2    | 147381 | Leukemia, MESH:D015470     | Calcitriol C | 15.32 | 7   |
| DMAP1    | 55929  | Leukemia, MESH:D015470     | Dexameth     | 15.32 | 11  |
| DUSP18   | 150290 | Leukemia, MESH:D015470     | Benzene C    | 15.32 | 25  |
| EMC3     | 55831  | Leukemia, MESH:D015470     | Indometha    | 15.32 | 7   |
| ERO1B    | 56605  | Leukemia, MESH:D015470     | Doxorubic    | 15.32 | 13  |
| F7       | 2155   | Leukemia, MESH:D015470     | Bezafibrat   | 15.32 | 13  |
| FBP2     | 8789   | Leukemia, MESH:D015473     | Arsenic ar:  | 15.32 | 157 |
| GLG1     | 2734   | Leukemia, MESH:D015470     | Doxorubic    | 15.32 | 13  |
| GRK6     | 2870   | Leukemia, MESH:D015470     | Dexameth     | 15.32 | 13  |
| HELB     | 92797  | Leukemia, MESH:D015470     | Decitabine   | 15.32 | 14  |
| HLA-E    | 3133   | Leukemia, MESH:D004915     | Doxorubic    | 15.32 | 3   |
| HOXC10   | 3226   | Leukemia, MESH:D015470     | Dexameth     | 15.32 | 9   |
| HOXD4    | 3233   | Leukemia, MESH:D015470     | Arsenic Tr   | 15.32 | 12  |
| LAMP1    | 3916   | Leukemia, MESH:D015470     | Arsenic Tr   | 15.32 | 20  |
| LPIN1    | 23175  | Leukemia, MESH:D015473     | Dexameth     | 15.32 | 159 |
| MB21D2   | 151963 | Leukemia, MESH:D015470     | Dexameth     | 15.32 | 7   |
| MYH7B    | 57644  | Leukemia, MESH:D015470     | Doxorubic    | 15.32 | 11  |
| NAA16    | 79612  | Leukemia, MESH:D015470     | Doxorubic    | 15.32 | 12  |
| PAFAH1B3 | 5050   | Leukemia, MESH:D015470     | Arsenic Tr   | 15.32 | 18  |
| PNMT     | 5409   | Leukemia, MESH:D015470     | Bortezomi    | 15.32 | 8   |
| PXMP4    | 11264  | Leukemia, MESH:D015470     | Dexameth     | 15.32 | 11  |
| RNF126   | 55658  | Leukemia, MESH:D015470     | Gasoline C   | 15.32 | 7   |
| RPL30    | 6156   | Leukemia, MESH:D015470     | Arsenic Tr   | 15.32 | 13  |
| SDK1     | 221935 | Leukemia, MESH:D015470     | Calcitriol C | 15.32 | 7   |
| SFSWAP   | 6433   | Leukemia, MESH:D015470     | Dexameth     | 15.32 | 13  |
| SLC6A1   | 6529   | Leukemia, MESH:D015470     | Dexameth     | 15.32 | 13  |
| SPEF2    | 79925  | Leukemia, MESH:D015470     | Indometha    | 15.32 | 6   |
| THYN1    | 29087  | Leukemia, MESH:D015470     | Arsenic Tr   | 15.32 | 19  |
| TRPS1    | 7227   | Leukemia, MESH:D015470     | Dexameth     | 15.32 | 13  |
| TXNRD2   | 10587  | Leukemia, MESH:D015470     | Bortezomi    | 15.32 | 12  |
| USF1     | 7391   | Leukemia, MESH:D015470     | Arsenic Tr   | 15.32 | 17  |
| ATF7IP2  | 80063  | Leukemia, MESH:D015470     | Doxorubic    | 15.31 | 11  |
| CEP120   | 153241 | Leukemia, MESH:D015470     | Doxorubic    | 15.31 | 13  |
| COLEC11  | 78989  | Leukemia, MESH:D015470     | Dexameth     | 15.31 | 12  |

|          |          |                        |              |       |     |
|----------|----------|------------------------|--------------|-------|-----|
| ENOPH1   | 58478    | Leukemia, MESH:D015470 | Dexameth     | 15.31 | 7   |
| FAF2     | 23197    | Leukemia, MESH:D015470 | Dexameth     | 15.31 | 13  |
| HABP4    | 22927    | Leukemia, MESH:D015470 | Doxorubic    | 15.31 | 13  |
| KCTD11   | 147040   | Leukemia, MESH:D015470 | (+)-JQ1 c    | 15.31 | 7   |
| KIAA1217 | 56243    | Leukemia, MESH:D015470 | Doxorubic    | 15.31 | 12  |
| KLHDC9   | 126823   | Leukemia, MESH:D015470 | Arsenic Tr   | 15.31 | 13  |
| KLHL15   | 80311    | Leukemia, MESH:D015470 | Doxorubic    | 15.31 | 11  |
| METTL23  | 124512   | Leukemia, MESH:D015470 | Dexameth     | 15.31 | 6   |
| MIR184   | 406960   | Leukemia, MESH:D015473 | Arsenic Ar   | 15.31 | 158 |
| MIR18A   | 406953   | Leukemia, MESH:D015470 | Arsenic Tr   | 15.31 | 12  |
| PLAT     | 5327     | Leukemia, MESH:D004915 | Cytarabine   | 15.31 | 3   |
| RNF168   | 165918   | Leukemia, MESH:D015470 | Dexameth     | 15.31 | 11  |
| TEX9     | 374618   | Leukemia, MESH:D015470 | Doxorubic    | 15.31 | 14  |
| TM9SF4   | 9777     | Leukemia, MESH:D015470 | Dexameth     | 15.31 | 12  |
| TRIM62   | 55223    | Leukemia, MESH:D015470 | Doxorubic    | 15.31 | 11  |
| ZNF750   | 79755    | Leukemia, MESH:D015470 | Dexameth     | 15.31 | 6   |
| ANKS1A   | 23294    | Leukemia, MESH:D015473 | Arsenic Tr   | 15.3  | 162 |
| MIR4423  | 1.01E+08 | Leukemia, MESH:D015470 | Doxorubic    | 15.3  | 16  |
| ASXL1    | 171023   | Leukemia, MESH:D004915 | Doxorubic    | 15.29 | 2   |
| CAB39    | 51719    | Leukemia, MESH:D004915 | Daunorub     | 15.29 | 2   |
| CCT8     | 10694    | Leukemia, MESH:D015473 | Arsenic Tr   | 15.29 | 157 |
| ETFDH    | 2110     | Leukemia, MESH:D015473 | Arsenic De   | 15.29 | 157 |
| FUT8     | 2530     | Leukemia, MESH:D015473 | Arsenic Ca   | 15.29 | 154 |
| PRKD1    | 5587     | Leukemia, MESH:D015473 | Arsenic ar:  | 15.29 | 158 |
| ZNF467   | 168544   | Leukemia, MESH:D015473 | Arsenic Cy   | 15.29 | 158 |
| DYSF     | 8291     | Leukemia, MESH:D015473 | arsenite Ci  | 15.28 | 155 |
| MYL1     | 4632     | Leukemia, MESH:D015473 | Arsenic De   | 15.28 | 156 |
| TAF1D    | 79101    | Leukemia, MESH:D015473 | Arsenic Ar   | 15.28 | 264 |
| TRIM16   | 10626    | Leukemia, MESH:D015473 | Arsenic Tr   | 15.28 | 261 |
| UPB1     | 51733    | Leukemia, MESH:D015473 | Dexameth     | 15.28 | 153 |
| WNT16    | 51384    | Leukemia, MESH:D015473 | Arsenic Ar   | 15.28 | 159 |
| ACSS1    | 84532    | Leukemia, MESH:D015473 | Arsenic ar:  | 15.27 | 11  |
| CORO1C   | 23603    | Leukemia, MESH:D015473 | Arsenic De   | 15.27 | 11  |
| DAXX     | 1616     | Leukemia, MESH:D015473 | Arsenic Ar   | 15.27 | 264 |
| GTPBP2   | 54676    | Leukemia, MESH:D015473 | Dexameth     | 15.27 | 153 |
| GYS1     | 2997     | Leukemia, MESH:D015473 | Arsenic Tr   | 15.27 | 261 |
| HAT1     | 8520     | Leukemia, MESH:D007948 | 2-(2-amin    | 15.27 | 2   |
| LAPTM5   | 7805     | Leukemia, MESH:D015473 | Arsenic Ar   | 15.27 | 264 |
| SCN2A    | 6326     | Leukemia, MESH:D015473 | Arsenic Tr   | 15.27 | 260 |
| SMAD6    | 4091     | Leukemia, MESH:D007948 | Arsenic Tr   | 15.27 | 3   |
| TUBB5    | 22154    | Leukemia, MESH:D015470 | Dexameth     | 15.27 | 17  |
| ATF1     | 466      | Leukemia, MESH:D015470 | Deferoxan    | 15.26 | 10  |
| BAG1     | 573      | Leukemia, MESH:D015473 | alvocidib /  | 15.26 | 157 |
| BOP1     | 23246    | Leukemia, MESH:D015470 | Arsenic Tr   | 15.26 | 18  |
| CUX2     | 23316    | Leukemia, MESH:D015470 | Doxorubic    | 15.26 | 12  |
| CYCS     | 54205    | Leukemia, MESH:D007948 | Arsenic Tr   | 15.26 | 3   |
| CYTIP    | 9595     | Leukemia, MESH:D015470 | Air Polluta  | 15.26 | 10  |
| FASLG    | 356      | Leukemia, MESH:D004915 | Daunorub     | 15.26 | 2   |
| FGD5-AS1 | 1.01E+08 | Leukemia, MESH:D015470 | Thalidomi    | 15.26 | 4   |
| JPT1     | 51155    | Leukemia, MESH:D015470 | Arsenic Tr   | 15.26 | 22  |
| KHSRP    | 8570     | Leukemia, MESH:D015470 | Doxorubic    | 15.26 | 14  |
| MPEG1    | 219972   | Leukemia, MESH:D015470 | Bezafibrat   | 15.26 | 10  |
| OLFML2B  | 25903    | Leukemia, MESH:D015470 | Calcitriol L | 15.26 | 10  |
| PCCB     | 5096     | Leukemia, MESH:D015470 | Doxorubic    | 15.26 | 14  |
| SALL1    | 6299     | Leukemia, MESH:D015470 | Cyclophos    | 15.26 | 13  |
| TRPV1    | 7442     | Leukemia, MESH:D015470 | Cyclophos    | 15.26 | 84  |
| VIL1     | 7429     | Leukemia, MESH:D015470 | Arsenic Tr   | 15.26 | 17  |
| ADRA2C   | 152      | Leukemia, MESH:D015470 | Dexameth     | 15.25 | 9   |



|          |        |                            |              |       |     |
|----------|--------|----------------------------|--------------|-------|-----|
| APCDD1L  | 164284 | Leukemia, MESH:D015473     | Arsenic Ca   | 15.25 | 9   |
| CFAP44   | 55779  | Leukemia, MESH:D015473     | Genistein I  | 15.25 | 152 |
| CHD3     | 1107   | Leukemia, MESH:D015470     | Decitabine   | 15.25 | 16  |
| DLST     | 1743   | Leukemia, MESH:D015470     | Doxorubic    | 15.25 | 14  |
| GTF2IRD1 | 9569   | Leukemia, MESH:D015470     | Doxorubic    | 15.25 | 14  |
| HDLBP    | 3069   | Leukemia, MESH:D015470     | Dexameth     | 15.25 | 14  |
| HYAL1    | 3373   | Leukemia, MESH:D015470     | Arsenic Tr   | 15.25 | 25  |
| ITIH5    | 80760  | Leukemia, MESH:D015470     | Doxorubic    | 15.25 | 14  |
| PLCD1    | 5333   | Leukemia, MESH:D015470     | Arsenic Tr   | 15.25 | 20  |
| PRF1     | 5551   | Leukemia, MESH:D015473     | Arsenic Ar   | 15.25 | 160 |
| PURA     | 5813   | Leukemia, MESH:D015470     | Cyclophos    | 15.25 | 13  |
| RPL13P5  | 283345 | Leukemia, MESH:D015470     | Bortezomi    | 15.25 | 5   |
| SF3B1    | 23451  | Leukemia, MESH:D015470     | Methotrex    | 15.25 | 12  |
| SLC1A6   | 6511   | Leukemia, MESH:D015470     | Calcitriol I | 15.25 | 8   |
| SLC25A22 | 79751  | Leukemia, MESH:D015470     | Dexameth     | 15.25 | 13  |
| SOCS2    | 8835   | Leukemia, MESH:D015473     | Calcitriol C | 15.25 | 156 |
| TMEM45B  | 120224 | Leukemia, MESH:D015470     | Dexameth     | 15.25 | 9   |
| TOX3     | 27324  | Leukemia, MESH:D015470     | Calcitriol C | 15.25 | 14  |
| TSPAN7   | 7102   | Leukemia, MESH:D015470     | Decitabine   | 15.25 | 15  |
| CDC42EP2 | 10435  | Leukemia, MESH:D015470     | Dexameth     | 15.24 | 12  |
| DIP2A    | 23181  | Leukemia, MESH:D015470     | Ethylnitros  | 15.24 | 10  |
| HSDL1    | 83693  | Leukemia, MESH:D015473     | Arsenic Ar   | 15.24 | 263 |
| INO80    | 54617  | Leukemia, MESH:D015473     | Arsenic Tr   | 15.24 | 155 |
| NFE2L3   | 9603   | Leukemia, MESH:D015473     | Arsenic Ar   | 15.24 | 263 |
| NR3C1    | 2908   | Leukemia, MESH:D007948     | 2-(2-amin    | 15.24 | 3   |
| OSM      | 5008   | Leukemia, MESH:D015473     | Antimony     | 15.24 | 156 |
| PKD2L1   | 9033   | Leukemia, MESH:D015473     | Arsenic Tr   | 15.24 | 153 |
| RBM45    | 129831 | Leukemia, MESH:D015473     | Arsenic ar:  | 15.24 | 155 |
| SUMO1    | 7341   | Leukemia, MESH:D007948     | 2-(2-amin    | 15.24 | 3   |
| DNAJB4   | 11080  | Leukemia, MESH:D015473     | Antimony     | 15.23 | 156 |
| GM2A     | 2760   | Leukemia, MESH:D015473     | Arsenic De   | 15.23 | 155 |
| IGFBP1B  | 793907 | Leukemia, MESH:D015470     | Dronabinc    | 15.23 | 8   |
| PLXNB2   | 23654  | Leukemia, MESH:D015473     | Arsenic Ar   | 15.23 | 159 |
| PPBP     | 5473   | Leukemia, MESH:D015473     | Arsenic Ar   | 15.23 | 159 |
| RPRD1B   | 58490  | Leukemia, MESH:D015473     | Dexameth     | 15.23 | 155 |
| STS      | 412    | Leukemia, MESH:D015473     | arsenite G   | 15.23 | 153 |
| TET2     | 54790  | Leukemia, MESH:D01marker/m | Arsenic Ar   | 15.22 | 266 |
| BHLHE22  | 27319  | Leukemia, MESH:D015470     | Cytarabine   | 15.22 | 74  |
| CGB3     | 1082   | Leukemia, MESH:D007948     | 2-(2-amin    | 15.22 | 2   |
| CMAH     | 12763  | Leukemia, MESH:D015470     | Dexameth     | 15.22 | 10  |
| F8       | 2157   | Leukemia, MESH:D015473     | Arsenic Tr   | 15.22 | 261 |
| HRAS     | 3265   | Leukemia, MESH:D015473     | Arsenic Ar   | 15.22 | 265 |
| INIP     | 58493  | Leukemia, MESH:D015470     | Air Polluta  | 15.22 | 10  |
| LIPE     | 3991   | Leukemia, MESH:D015470     | Deferoxan    | 15.22 | 15  |
| NOP10    | 55505  | Leukemia, MESH:D015473     | arsenite D   | 15.22 | 154 |
| PADI2    | 11240  | Leukemia, MESH:D015473     | arsenite D   | 15.22 | 155 |
| PAPPA    | 5069   | Leukemia, MESH:D007948     | Arsenic Tr   | 15.22 | 3   |
| PHEX     | 5251   | Leukemia, MESH:D015473     | Arsenic Ca   | 15.22 | 156 |
| ANKRD27  | 84079  | Leukemia, MESH:D015470     | Etoposide    | 15.21 | 15  |
| C1ORF112 | 55732  | Leukemia, MESH:D015473     | Calcitriol C | 15.21 | 153 |
| GDF2     | 2658   | Leukemia, MESH:D015470     | Alitretnoi   | 15.21 | 12  |
| GPS2     | 2874   | Leukemia, MESH:D015470     | Dexameth     | 15.21 | 6   |
| H2AC19   | 723790 | Leukemia, MESH:D015470     | Benzene C    | 15.21 | 25  |
| HARS2    | 23438  | Leukemia, MESH:D015470     | Arsenic Tr   | 15.21 | 27  |
| IRGM1    | 15944  | Leukemia, MESH:D015470     | Dexameth     | 15.21 | 8   |
| KCNJ2-AS | 400617 | Leukemia, MESH:D015470     | Doxorubic    | 15.21 | 8   |
| LATS1    | 9113   | Leukemia, MESH:D015470     | Decitabine   | 15.21 | 18  |
| LRRC39   | 127495 | Leukemia, MESH:D015470     | Dexameth     | 15.21 | 12  |

|          |        |                            |              |       |     |
|----------|--------|----------------------------|--------------|-------|-----|
| PKNOX1   | 5316   | Leukemia, MESH:D015470     | Arsenic Tr   | 15.21 | 14  |
| POLR2A   | 5430   | Leukemia, MESH:D015473     | alvocidib/   | 15.21 | 157 |
| PRL      | 5617   | Leukemia, MESH:D004915     | Cytarabine   | 15.21 | 4   |
| SLC6A10P | 653562 | Leukemia, MESH:D015470     | (+)-JQ1 α    | 15.21 | 4   |
| SNRNP48  | 154007 | Leukemia, MESH:D015470     | Bortezomi    | 15.21 | 10  |
| SPNS1    | 83985  | Leukemia, MESH:D015470     | Alitretinoi  | 15.21 | 7   |
| SZT2     | 23334  | Leukemia, MESH:D015470     | Dexameth     | 15.21 | 11  |
| TIMMDC1  | 51300  | Leukemia, MESH:D015470     | Air Polluta  | 15.21 | 11  |
| ADAMTS2  | 80070  | Leukemia, MESH:D015470     | Calcitriol[E | 15.2  | 6   |
| ALKBH5   | 54890  | Leukemia, MESH:D015470     | Dronabinc    | 15.2  | 6   |
| APOBR    | 55911  | Leukemia, MESH:D015470     | Bortezomi    | 15.2  | 8   |
| ATP5G1   | 11951  | Leukemia, MESH:D015470     | Arsenic Tr   | 15.2  | 19  |
| BPNT2    | 54928  | Leukemia, MESH:D004915     | Cytarabine   | 15.2  | 2   |
| DNAJC22  | 79962  | Leukemia, MESH:D015470     | Dronabinc    | 15.2  | 7   |
| FAM181B  | 220382 | Leukemia, MESH:D015470     | Decitabine   | 15.2  | 16  |
| FBRSL1   | 57666  | Leukemia, MESH:D015470     | Indometha    | 15.2  | 8   |
| FEZF2    | 55079  | Leukemia, MESH:D015470     | Dexameth     | 15.2  | 7   |
| GEMIN8   | 54960  | Leukemia, MESH:D015470     | Decitabine   | 15.2  | 18  |
| GLUD2    | 2747   | Leukemia, MESH:D015470     | Calcitriol[E | 15.2  | 7   |
| IL36RN   | 26525  | Leukemia, MESH:D015470     | Benzene[E    | 15.2  | 25  |
| LARP4B   | 23185  | Leukemia, MESH:D004915     | Doxorubic    | 15.2  | 2   |
| MGRN1    | 23295  | Leukemia, MESH:D015470     | Dexameth     | 15.2  | 12  |
| MIR134   | 406924 | Leukemia, MESH:D015470     | Calcitriol[E | 15.2  | 8   |
| MIR212   | 406994 | Leukemia, MESH:D015470     | Arsenic Tr   | 15.2  | 32  |
| MPP4     | 58538  | Leukemia, MESH:D015470     | Arsenic Tr   | 15.2  | 13  |
| N4BP1    | 9683   | Leukemia, MESH:D004915     | Doxorubic    | 15.2  | 2   |
| NCK2     | 8440   | Leukemia, MESH:D004915     | Daunorub     | 15.2  | 2   |
| NXPH4    | 11247  | Leukemia, MESH:D015470     | Decitabine   | 15.2  | 12  |
| PLA2G10  | 8399   | Leukemia, MESH:D015473     | Calcitriol[E | 15.2  | 151 |
| RADX     | 55086  | Leukemia, MESH:D015470     | Calcitriol[M | 15.2  | 8   |
| SETDB1   | 9869   | Leukemia, MESH:D015470     | Arsenic Tr   | 15.2  | 18  |
| SLC39A3  | 29985  | Leukemia, MESH:D015470     | Calcitriol[E | 15.2  | 7   |
| SLC41A1  | 254428 | Leukemia, MESH:D015470     | Calcitriol[E | 15.2  | 12  |
| SLC4A11  | 83959  | Leukemia, MESH:D004915     | Doxorubic    | 15.2  | 2   |
| TRIM69   | 140691 | Leukemia, MESH:D015470     | Doxorubic    | 15.2  | 12  |
| ZKSCAN3  | 80317  | Leukemia, MESH:D015470     | Methotrex    | 15.2  | 10  |
| ADO      | 84890  | Leukemia, MESH:D015470     | Dexameth     | 15.19 | 11  |
| ARL6     | 84100  | Leukemia, MESH:D015470     | Dexameth     | 15.19 | 8   |
| CAMSAP3  | 57662  | Leukemia, MESH:D015470     | Calcitriol[E | 15.19 | 6   |
| CAPS2    | 84698  | Leukemia, MESH:D015470     | Dexameth     | 15.19 | 6   |
| CES3     | 23491  | Leukemia, MESH:D015473     | Dexameth     | 15.19 | 7   |
| GTPBP8   | 29083  | Leukemia, MESH:D015470     | Dexameth     | 15.19 | 7   |
| IFI35    | 3430   | Leukemia, MESH:D015473     | Calcitriol[E | 15.19 | 155 |
| KLHL18   | 23276  | Leukemia, MESH:D015470     | Dexameth     | 15.19 | 11  |
| KLHL22   | 84861  | Leukemia, MESH:D015470     | Dexameth     | 15.19 | 11  |
| LGR4     | 55366  | Leukemia, MESH:D015473     | Arsenic Tr   | 15.19 | 263 |
| MTX3     | 345778 | Leukemia, MESH:D015470     | (+)-JQ1 α    | 15.19 | 8   |
| NAA40    | 79829  | Leukemia, MESH:D015470     | Dexameth     | 15.19 | 11  |
| PEF1     | 553115 | Leukemia, MESH:D015470     | Decitabine   | 15.19 | 17  |
| POLA2    | 23649  | Leukemia, MESH:D015473     | Calcitriol[E | 15.19 | 155 |
| RFXAP    | 5994   | Leukemia, MESH:D015470     | (+)-JQ1 α    | 15.19 | 7   |
| STAU1    | 6780   | Leukemia, MESH:D015470     | Dexameth     | 15.19 | 11  |
| TARBP2   | 6895   | Leukemia, MESH:D015470     | Dexameth     | 15.19 | 11  |
| TMEM41A  | 90407  | Leukemia, MESH:D015470     | Dexameth     | 15.19 | 13  |
| ZDHHC17  | 23390  | Leukemia, MESH:D015470     | Dexameth     | 15.19 | 6   |
| ZGRF1    | 55345  | Leukemia, MESH:D015470     | Calcitriol[E | 15.19 | 12  |
| ZSWIM4   | 65249  | Leukemia, MESH:D015470     | Doxorubic    | 15.19 | 13  |
| FXYD6    | 53826  | Leukemia, MESH:D01marker/m | Decitabine   | 15.18 | 20  |

|          |        |                        |              |       |     |
|----------|--------|------------------------|--------------|-------|-----|
| BTF3     | 689    | Leukemia, MESH:D015470 | Arsenic Tr   | 15.18 | 20  |
| CELSR2   | 1952   | Leukemia, MESH:D015470 | Calcitriol[F | 15.18 | 10  |
| DLX5     | 1749   | Leukemia, MESH:D015470 | Azacitidine  | 15.18 | 15  |
| ERMAP    | 114625 | Leukemia, MESH:D015470 | Doxorubic    | 15.18 | 12  |
| INTS9    | 55756  | Leukemia, MESH:D015470 | Doxorubic    | 15.18 | 12  |
| KCNK2    | 3776   | Leukemia, MESH:D015470 | Arsenic Tr   | 15.18 | 14  |
| KLHL5    | 51088  | Leukemia, MESH:D015470 | Calcitriol[C | 15.18 | 20  |
| LTBP4    | 8425   | Leukemia, MESH:D015470 | Decitabine   | 15.18 | 19  |
| LUC7L    | 55692  | Leukemia, MESH:D015470 | Bortezomi    | 15.18 | 8   |
| PDE1A    | 5136   | Leukemia, MESH:D015473 | Arsenic Tr   | 15.18 | 164 |
| PPAN     | 56342  | Leukemia, MESH:D015470 | Dronabinc    | 15.18 | 11  |
| PTPRO    | 5800   | Leukemia, MESH:D015473 | Arsenic Tr   | 15.18 | 261 |
| RBP7     | 116362 | Leukemia, MESH:D015470 | Calcitriol[C | 15.18 | 14  |
| RIPK4    | 54101  | Leukemia, MESH:D015470 | Calcitriol[C | 15.18 | 9   |
| SKIL     | 6498   | Leukemia, MESH:D015473 | Arsenic[Ge   | 15.18 | 156 |
| SLC22A23 | 63027  | Leukemia, MESH:D015473 | Arsenic[Ca   | 15.18 | 155 |
| STXBP6   | 29091  | Leukemia, MESH:D015470 | Arsenic Tr   | 15.18 | 25  |
| TPCN1    | 53373  | Leukemia, MESH:D015470 | Dexameth     | 15.18 | 12  |
| ABCA11P  | 79963  | Leukemia, MESH:D015470 | Dexameth     | 15.17 | 4   |
| CMIP     | 80790  | Leukemia, MESH:D004915 | Daunorub     | 15.17 | 2   |
| CSF2RB   | 1439   | Leukemia, MESH:D015473 | Arsenic Tr   | 15.17 | 260 |
| GSS      | 2937   | Leukemia, MESH:D015473 | Arsenic[Bu   | 15.17 | 156 |
| INF2     | 64423  | Leukemia, MESH:D015470 | Dexameth     | 15.17 | 8   |
| OTUB2    | 78990  | Leukemia, MESH:D015470 | Dexameth     | 15.17 | 7   |
| PDGFRL   | 5157   | Leukemia, MESH:D015473 | Calcitriol[C | 15.17 | 154 |
| PSMB2    | 5690   | Leukemia, MESH:D015473 | arsenite[D   | 15.17 | 154 |
| PTPRU    | 10076  | Leukemia, MESH:D015470 | Dexameth     | 15.17 | 8   |
| TCFL5    | 10732  | Leukemia, MESH:D015473 | Etoposide    | 15.17 | 151 |
| TUBB4A   | 10382  | Leukemia, MESH:D015470 | Doxorubic    | 15.17 | 13  |
| ZIC6     | 415097 | Leukemia, MESH:D015470 | Dexameth     | 15.17 | 4   |
| HDAC3    | 8841   | Leukemia, MESH:D015473 | Dexameth     | 15.16 | 155 |
| IGHA1    | 3493   | Leukemia, MESH:D015470 | Air Polluta  | 15.16 | 11  |
| JUN      | 3725   | Leukemia, MESH:D004915 | Cytarabine   | 15.16 | 3   |
| KCNK9    | 51305  | Leukemia, MESH:D015473 | Calcitriol[C | 15.16 | 5   |
| NCK2A    | 393972 | Leukemia, MESH:D015470 | Tretinoin[t  | 15.16 | 5   |
| PHB1     | 5245   | Leukemia, MESH:D015470 | Arsenic Tr   | 15.16 | 19  |
| PSMD7    | 5713   | Leukemia, MESH:D015473 | Arsenic Tr   | 15.16 | 262 |
| SCAPER   | 49855  | Leukemia, MESH:D004915 | Doxorubic    | 15.16 | 2   |
| SUN2     | 25777  | Leukemia, MESH:D004915 | Doxorubic    | 15.16 | 2   |
| ZNF423   | 23090  | Leukemia, MESH:D015473 | Cytarabine   | 15.16 | 155 |
| HMOX1    | 3162   | Leukemia, MESH:D007948 | 2-(2-amin    | 15.15 | 3   |
| CRP      | 1401   | Leukemia, MESH:D015473 | alpha-Toc    | 15.14 | 161 |
| TENT5A   | 55603  | Leukemia, MESH:D015473 | arsenite[C   | 15.14 | 156 |
| TTR      | 7276   | Leukemia, MESH:D015470 | Alitretinoi  | 15.14 | 17  |
| VGLL4    | 9686   | Leukemia, MESH:D004915 | Cytarabine   | 15.14 | 3   |
| ADAM19   | 8728   | Leukemia, MESH:D015473 | Calcitriol[C | 15.13 | 156 |
| CFAP36   | 112942 | Leukemia, MESH:D015473 | Arsenic Tr   | 15.13 | 261 |
| GRIN2A   | 2903   | Leukemia, MESH:D015470 | Allopurinc   | 15.13 | 30  |
| HN1      | 1E+08  | Leukemia, MESH:D015470 | Tobacco S    | 15.13 | 7   |
| ILK      | 3611   | Leukemia, MESH:D015473 | Dexameth     | 15.13 | 157 |
| POLR1H   | 30834  | Leukemia, MESH:D004915 | Doxorubic    | 15.13 | 3   |
| RPS6KB1  | 6198   | Leukemia, MESH:D004915 | Daunorub     | 15.13 | 3   |
| SERBP1   | 26135  | Leukemia, MESH:D015473 | Arsenic Tr   | 15.13 | 266 |
| SESN3    | 143686 | Leukemia, MESH:D015473 | Cytarabine   | 15.13 | 155 |
| SPICE1   | 152185 | Leukemia, MESH:D015473 | Arsenic[Ar   | 15.13 | 263 |
| ZBTB10   | 65986  | Leukemia, MESH:D015473 | Arsenic[De   | 15.13 | 13  |
| AVPI1    | 60370  | Leukemia, MESH:D015470 | Benzene[E    | 15.12 | 29  |
| CHAT     | 1103   | Leukemia, MESH:D015470 | Azacitidine  | 15.12 | 84  |

|          |        |                        |              |       |     |
|----------|--------|------------------------|--------------|-------|-----|
| CHD1     | 1105   | Leukemia, MESH:D004915 | Doxorubic    | 15.12 | 2   |
| CUL4A    | 8451   | Leukemia, MESH:D015470 | Benzene I    | 15.12 | 25  |
| EHMT2    | 10919  | Leukemia, MESH:D015473 | Arsenic Ar   | 15.12 | 265 |
| KLF12    | 11278  | Leukemia, MESH:D015473 | Arsenic Ar   | 15.12 | 157 |
| NOVA1    | 4857   | Leukemia, MESH:D004915 | Cytarabine   | 15.12 | 3   |
| PLEKHG3  | 26030  | Leukemia, MESH:D004915 | Cytarabine   | 15.12 | 2   |
| PPP1R13L | 10848  | Leukemia, MESH:D004915 | Daunorub     | 15.12 | 2   |
| PRKG1    | 5592   | Leukemia, MESH:D015470 | Dexameth     | 15.12 | 14  |
| SEC24D   | 9871   | Leukemia, MESH:D015473 | arsenite G   | 15.12 | 154 |
| SUCLA2   | 8803   | Leukemia, MESH:D015470 | Doxorubic    | 15.12 | 22  |
| SYT1     | 6857   | Leukemia, MESH:D015473 | arsenite Ci  | 15.12 | 154 |
| TRAM2    | 9697   | Leukemia, MESH:D004915 | Doxorubic    | 15.12 | 2   |
| UBE2D3   | 7323   | Leukemia, MESH:D015473 | Arsenic De   | 15.12 | 11  |
| ZNF560   | 147741 | Leukemia, MESH:D015473 | Arsenic Ar   | 15.12 | 154 |
| BDH2     | 56898  | Leukemia, MESH:D015473 | Arsenic Ar   | 15.11 | 263 |
| BLVRA    | 644    | Leukemia, MESH:D015470 | Calcitriol C | 15.11 | 9   |
| CH25H    | 9023   | Leukemia, MESH:D015473 | arsenite D   | 15.11 | 155 |
| CXCL12A  | 352944 | Leukemia, MESH:D015470 | Dexameth     | 15.11 | 5   |
| DDIAS    | 220042 | Leukemia, MESH:D015470 | Calcitriol C | 15.11 | 9   |
| EPB41    | 2035   | Leukemia, MESH:D015470 | Decitabine   | 15.11 | 15  |
| EPOR     | 2057   | Leukemia, MESH:D007948 | Arsenic Tr   | 15.11 | 3   |
| FETUB    | 26998  | Leukemia, MESH:D015473 | Arsenic De   | 15.11 | 156 |
| GFAP     | 2670   | Leukemia, MESH:D004915 | Doxorubic    | 15.11 | 3   |
| GPCPD1   | 56261  | Leukemia, MESH:D015473 | Arsenic De   | 15.11 | 156 |
| GULP1    | 51454  | Leukemia, MESH:D015473 | Arsenic Tr   | 15.11 | 262 |
| IGKC     | 3514   | Leukemia, MESH:D015470 | Arsenic Tr   | 15.11 | 16  |
| KLK2     | 3817   | Leukemia, MESH:D015473 | Calcitriol E | 15.11 | 6   |
| KLRK1    | 22914  | Leukemia, MESH:D015470 | Arsenic Tr   | 15.11 | 16  |
| MIR25    | 407014 | Leukemia, MESH:D015470 | Air Polluta  | 15.11 | 13  |
| NDUFA5   | 4698   | Leukemia, MESH:D015470 | Benzene C    | 15.11 | 27  |
| NEUROD1  | 4760   | Leukemia, MESH:D015470 | Dexameth     | 15.11 | 9   |
| PRKCSH   | 5589   | Leukemia, MESH:D015470 | Doxorubic    | 15.11 | 12  |
| RAB14    | 51552  | Leukemia, MESH:D015470 | Benzene E    | 15.11 | 24  |
| RALA     | 5898   | Leukemia, MESH:D015473 | Arsenic Tr   | 15.11 | 262 |
| RTP4     | 64108  | Leukemia, MESH:D015470 | Irinotecan   | 15.11 | 8   |
| SERINC3  | 10955  | Leukemia, MESH:D015470 | Dexameth     | 15.11 | 14  |
| UROD     | 7389   | Leukemia, MESH:D015470 | Arsenic Tr   | 15.11 | 17  |
| ABCG5    | 64240  | Leukemia, MESH:D015473 | Arsenic Cr   | 15.1  | 155 |
| C11ORF1  | 64776  | Leukemia, MESH:D015470 | Doxorubic    | 15.1  | 13  |
| CD151    | 977    | Leukemia, MESH:D015470 | Cyclophos    | 15.1  | 10  |
| FADS3    | 3995   | Leukemia, MESH:D015470 | Dexameth     | 15.1  | 16  |
| FCF1     | 51077  | Leukemia, MESH:D015470 | Doxorubic    | 15.1  | 11  |
| GOSR2    | 9570   | Leukemia, MESH:D015470 | Bortezomi    | 15.1  | 13  |
| INS1     | 16333  | Leukemia, MESH:D007948 | 2-(2-amin    | 15.1  | 3   |
| KANK2    | 25959  | Leukemia, MESH:D015470 | Doxorubic    | 15.1  | 12  |
| LMNB2    | 84823  | Leukemia, MESH:D015470 | Dexameth     | 15.1  | 9   |
| MIR17    | 406952 | Leukemia, MESH:D015470 | Arsenic Tr   | 15.1  | 14  |
| MTX2     | 10651  | Leukemia, MESH:D015470 | Benzene C    | 15.1  | 24  |
| POTEE    | 445582 | Leukemia, MESH:D015470 | Calcitriol C | 15.1  | 11  |
| RNPEP    | 6051   | Leukemia, MESH:D015470 | Arsenic Tr   | 15.1  | 13  |
| ROBO1    | 6091   | Leukemia, MESH:D007948 | Arsenic Tr   | 15.1  | 2   |
| RSPO2    | 340419 | Leukemia, MESH:D015470 | Arsenic Tr   | 15.1  | 80  |
| SCNN1G   | 6340   | Leukemia, MESH:D015470 | Dexameth     | 15.1  | 13  |
| SEMA4D   | 10507  | Leukemia, MESH:D015470 | Doxorubic    | 15.1  | 15  |
| SH3BGRL3 | 83442  | Leukemia, MESH:D015470 | Arsenic Tr   | 15.1  | 15  |
| TATDN2   | 9797   | Leukemia, MESH:D015470 | Dexameth     | 15.1  | 5   |
| ADSS2    | 159    | Leukemia, MESH:D015470 | Arsenic Tr   | 15.09 | 13  |
| CNIH2    | 254263 | Leukemia, MESH:D015470 | Calcitriol C | 15.09 | 74  |

|          |        |                        |              |       |     |
|----------|--------|------------------------|--------------|-------|-----|
| CRIM1    | 51232  | Leukemia, MESH:D015473 | Arsenic Ar   | 15.09 | 262 |
| CRNN     | 49860  | Leukemia, MESH:D015470 | Methotrex    | 15.09 | 8   |
| CYP2B9   | 13094  | Leukemia, MESH:D015473 | alpha-Toc    | 15.09 | 12  |
| EXT2     | 2132   | Leukemia, MESH:D015470 | Cytarabine   | 15.09 | 78  |
| GALNT4   | 8693   | Leukemia, MESH:D015470 | Bortezomi    | 15.09 | 11  |
| HINFP    | 25988  | Leukemia, MESH:D015470 | Arsenic Tr   | 15.09 | 13  |
| MCRS1    | 10445  | Leukemia, MESH:D015470 | Dexameth     | 15.09 | 6   |
| MIR20B   | 574032 | Leukemia, MESH:D015470 | Arsenic Tr   | 15.09 | 15  |
| PGAM4    | 441531 | Leukemia, MESH:D015470 | Doxorubic    | 15.09 | 11  |
| POLR2D   | 5433   | Leukemia, MESH:D015470 | Mitoxantr    | 15.09 | 18  |
| PRORSD1I | 344405 | Leukemia, MESH:D015470 | (+)-JQ1 c    | 15.09 | 5   |
| PSMC6    | 5706   | Leukemia, MESH:D015473 | alpha-Toc    | 15.09 | 12  |
| STX5     | 6811   | Leukemia, MESH:D015470 | Doxorubic    | 15.09 | 11  |
| TIGD1    | 200765 | Leukemia, MESH:D015470 | (+)-JQ1 c    | 15.09 | 5   |
| TRAPPC2L | 51693  | Leukemia, MESH:D015470 | Dexameth     | 15.09 | 11  |
| VEZT     | 55591  | Leukemia, MESH:D015470 | Bortezomi    | 15.09 | 12  |
| ZNF747   | 65988  | Leukemia, MESH:D015470 | Doxorubic    | 15.09 | 12  |
| ZNF771   | 51333  | Leukemia, MESH:D015470 | Arsenic Tr   | 15.09 | 17  |
| ACTR3C   | 653857 | Leukemia, MESH:D015470 | Arsenic Tr   | 15.08 | 11  |
| ADAMTS8  | 11095  | Leukemia, MESH:D015470 | Decitabine   | 15.08 | 18  |
| BTBD2    | 55643  | Leukemia, MESH:D015470 | Arsenic Tr   | 15.08 | 13  |
| CDR2L    | 30850  | Leukemia, MESH:D015470 | Calcitriol L | 15.08 | 11  |
| CMC2     | 56942  | Leukemia, MESH:D015473 | Daunorub     | 15.08 | 159 |
| CUZD1    | 50624  | Leukemia, MESH:D015470 | Dexameth     | 15.08 | 9   |
| DCTN6    | 10671  | Leukemia, MESH:D015470 | Doxorubic    | 15.08 | 12  |
| FER1L4   | 80307  | Leukemia, MESH:D015470 | Dexameth     | 15.08 | 8   |
| FOXC1    | 2296   | Leukemia, MESH:D015473 | Calcitriol L | 15.08 | 152 |
| HOXA13   | 3209   | Leukemia, MESH:D015473 | Genistein L  | 15.08 | 152 |
| HS2ST1   | 9653   | Leukemia, MESH:D015470 | Doxorubic    | 15.08 | 15  |
| ICAM4    | 3386   | Leukemia, MESH:D015470 | Doxorubic    | 15.08 | 15  |
| IL23R    | 149233 | Leukemia, MESH:D015473 | Mercaptoq    | 15.08 | 151 |
| JMJD7-PL | 8681   | Leukemia, MESH:D015470 | Dexameth     | 15.08 | 5   |
| KDELR3   | 11015  | Leukemia, MESH:D015473 | Arsenic Ca   | 15.08 | 158 |
| KIAA0895 | 23366  | Leukemia, MESH:D015470 | Doxorubic    | 15.08 | 10  |
| LGI3     | 203190 | Leukemia, MESH:D015470 | Arsenic Tr   | 15.08 | 15  |
| LPXN     | 9404   | Leukemia, MESH:D015473 | arsenite D   | 15.08 | 154 |
| LRRC23   | 10233  | Leukemia, MESH:D015470 | Decitabine   | 15.08 | 18  |
| LSM8     | 51691  | Leukemia, MESH:D015470 | Pentachlo    | 15.08 | 9   |
| N4BP3    | 23138  | Leukemia, MESH:D015470 | Calcitriol L | 15.08 | 11  |
| NAP1L3   | 4675   | Leukemia, MESH:D015470 | Dexameth     | 15.08 | 11  |
| NCKIPSD  | 51517  | Leukemia, MESH:D015470 | Arsenic Tr   | 15.08 | 18  |
| NEUROD2  | 4761   | Leukemia, MESH:D015470 | Dexameth     | 15.08 | 8   |
| PDGFC    | 56034  | Leukemia, MESH:D015473 | Arsenic ars  | 15.08 | 155 |
| PRKX     | 5613   | Leukemia, MESH:D004915 | Daunorub     | 15.08 | 2   |
| RAB33B   | 83452  | Leukemia, MESH:D015470 | Dronabinc    | 15.08 | 9   |
| RAD51D   | 5892   | Leukemia, MESH:D015470 | Arsenic Tr   | 15.08 | 14  |
| RETREG3  | 162427 | Leukemia, MESH:D015470 | Dronabinc    | 15.08 | 6   |
| TOE1     | 114034 | Leukemia, MESH:D015470 | Dronabinc    | 15.08 | 7   |
| TRA2A    | 29896  | Leukemia, MESH:D015473 | Arsenic Ar   | 15.08 | 161 |
| ZC3H10   | 84872  | Leukemia, MESH:D015470 | Doxorubic    | 15.08 | 11  |
| ZNF398   | 57541  | Leukemia, MESH:D015470 | Doxorubic    | 15.08 | 10  |
| AMIGO3   | 386724 | Leukemia, MESH:D015470 | Dexameth     | 15.07 | 6   |
| C15ORF61 | 145853 | Leukemia, MESH:D015470 | Tobacco S    | 15.07 | 6   |
| CEP131   | 22994  | Leukemia, MESH:D015470 | Dexameth     | 15.07 | 6   |
| CREM     | 1390   | Leukemia, MESH:D015473 | Arsenic Ar   | 15.07 | 162 |
| GALNT5   | 11227  | Leukemia, MESH:D015470 | Dexameth     | 15.07 | 11  |
| GRIA3    | 2892   | Leukemia, MESH:D015470 | Benzoates    | 15.07 | 17  |
| H6PD     | 9563   | Leukemia, MESH:D015473 | Arsenic Ar   | 15.07 | 160 |

|         |        |                        |              |       |     |
|---------|--------|------------------------|--------------|-------|-----|
| JADE1   | 79960  | Leukemia, MESH:D015473 | Arsenic ars  | 15.07 | 158 |
| KCNMB3  | 27094  | Leukemia, MESH:D015470 | Tobacco S    | 15.07 | 6   |
| MAB21L1 | 4081   | Leukemia, MESH:D015470 | Dexameth     | 15.07 | 7   |
| MBTPS2  | 51360  | Leukemia, MESH:D015470 | Dexameth     | 15.07 | 11  |
| MSRA    | 4482   | Leukemia, MESH:D015473 | Arsenic Ar   | 15.07 | 161 |
| NOVA2   | 4858   | Leukemia, MESH:D015470 | Doxorubic    | 15.07 | 11  |
| PSD4    | 23550  | Leukemia, MESH:D015470 | Doxorubic    | 15.07 | 12  |
| RMST    | 196475 | Leukemia, MESH:D015470 | Tobacco S    | 15.07 | 6   |
| RSAD1   | 55316  | Leukemia, MESH:D015470 | Doxorubic    | 15.07 | 13  |
| SMPD4   | 55627  | Leukemia, MESH:D015470 | Doxorubic    | 15.07 | 12  |
| STARD5  | 80765  | Leukemia, MESH:D004915 | Doxorubic    | 15.07 | 2   |
| STOX1   | 219736 | Leukemia, MESH:D015470 | Pentachlo    | 15.07 | 7   |
| STRADB  | 55437  | Leukemia, MESH:D015470 | Doxorubic    | 15.07 | 12  |
| TAF1A   | 9015   | Leukemia, MESH:D015470 | Dexameth     | 15.07 | 7   |
| TENT5C  | 54855  | Leukemia, MESH:D007948 | Arsenic Tr   | 15.07 | 4   |
| TMEM87B | 84910  | Leukemia, MESH:D015470 | Calcitriol C | 15.07 | 12  |
| TOX4    | 9878   | Leukemia, MESH:D015470 | Arsenic Tr   | 15.07 | 18  |
| TRAF3   | 7187   | Leukemia, MESH:D015473 | Arsenic Ar   | 15.07 | 263 |
| UBA1    | 7317   | Leukemia, MESH:D015473 | Arsenic Ar   | 15.07 | 159 |
| UCK2    | 7371   | Leukemia, MESH:D015473 | Calcitriol C | 15.07 | 8   |
| HMGCR   | 3156   | Leukemia, MESH:D015473 | alpha-Toc    | 15.06 | 156 |
| ODF2L   | 57489  | Leukemia, MESH:D015470 | Doxorubic    | 15.06 | 12  |
| PWWP3B  | 139221 | Leukemia, MESH:D015470 | Doxorubic    | 15.06 | 12  |
| SPTLC3  | 55304  | Leukemia, MESH:D004915 | Cytarabine   | 15.06 | 3   |
| TENT2   | 167153 | Leukemia, MESH:D015473 | Arsenic Tr   | 15.06 | 156 |
| DPH1    | 1801   | Leukemia, MESH:D015473 | Dexameth     | 15.05 | 156 |
| EDN3    | 1908   | Leukemia, MESH:D015470 | Dronabinc    | 15.05 | 8   |
| IL2     | 3558   | Leukemia, MESH:D007948 | 2-(2-amin    | 15.05 | 3   |
| RNF19B  | 127544 | Leukemia, MESH:D015473 | arsenite M   | 15.05 | 152 |
| ACOT9   | 23597  | Leukemia, MESH:D015470 | Arsenic Tr   | 15.04 | 34  |
| ATG3    | 64422  | Leukemia, MESH:D015470 | Arsenic Tr   | 15.04 | 15  |
| COX3    | 4514   | Leukemia, MESH:D015470 | Deferoxan    | 15.04 | 13  |
| CPN1    | 1369   | Leukemia, MESH:D015470 | Dexameth     | 15.04 | 10  |
| GRB7    | 2886   | Leukemia, MESH:D015470 | Alitretinoin | 15.04 | 13  |
| HEG1    | 57493  | Leukemia, MESH:D015470 | Benzene C    | 15.04 | 26  |
| IFT22   | 64792  | Leukemia, MESH:D015473 | Arsenic ars  | 15.04 | 11  |
| LYPLA1  | 10434  | Leukemia, MESH:D015470 | Alitretinoin | 15.04 | 19  |
| MTF1    | 4520   | Leukemia, MESH:D015473 | Arsenic Tr   | 15.04 | 261 |
| PCSK6   | 5046   | Leukemia, MESH:D015473 | Arsenic ca   | 15.04 | 12  |
| PHACTR2 | 9749   | Leukemia, MESH:D004915 | Cytarabine   | 15.04 | 3   |
| PLIN4   | 729359 | Leukemia, MESH:D015470 | Bezafibrat   | 15.04 | 14  |
| RAD23B  | 5887   | Leukemia, MESH:D007948 | Arsenic Tr   | 15.04 | 3   |
| SAA3    | 20210  | Leukemia, MESH:D015473 | Arsenic Ch   | 15.04 | 12  |
| SLC12A7 | 10723  | Leukemia, MESH:D015470 | Air Polluta  | 15.04 | 11  |
| SLC27A6 | 28965  | Leukemia, MESH:D015473 | Dexameth     | 15.04 | 151 |
| SORBS2  | 8470   | Leukemia, MESH:D015473 | Cytarabine   | 15.04 | 155 |
| SYAP1   | 94056  | Leukemia, MESH:D015473 | arsenite G   | 15.04 | 7   |
| ACP1    | 52     | Leukemia, MESH:D015470 | Air Polluta  | 15.03 | 14  |
| ARSD    | 414    | Leukemia, MESH:D015473 | Genistein I  | 15.03 | 152 |
| CDK14   | 5218   | Leukemia, MESH:D015470 | Dexameth     | 15.03 | 8   |
| CHD4    | 1108   | Leukemia, MESH:D015470 | Dexameth     | 15.03 | 14  |
| CREG2   | 200407 | Leukemia, MESH:D015473 | Calcitriol C | 15.03 | 153 |
| CYP51A1 | 1595   | Leukemia, MESH:D015473 | Arsenic De   | 15.03 | 153 |
| DHODH   | 1723   | Leukemia, MESH:D015470 | Doxorubic    | 15.03 | 14  |
| DTNA    | 1837   | Leukemia, MESH:D015470 | Dexameth     | 15.03 | 13  |
| EHD1A   | 405810 | Leukemia, MESH:D015473 | Dexameth     | 15.03 | 152 |
| GNPDA1  | 10007  | Leukemia, MESH:D015470 | Air Polluta  | 15.03 | 7   |
| GRHL1   | 29841  | Leukemia, MESH:D015470 | Calcitriol T | 15.03 | 8   |

|         |        |                             |              |       |     |
|---------|--------|-----------------------------|--------------|-------|-----|
| KLF11   | 8462   | Leukemia, MESH:D015473      | Arsenic Tr   | 15.03 | 155 |
| MRPL12  | 6182   | Leukemia, MESH:D015470      | Doxorubic    | 15.03 | 13  |
| NTD5    | 386628 | Leukemia, MESH:D015473      | Dexameth     | 15.03 | 152 |
| NXPH1   | 30010  | Leukemia, MESH:D015473      | arsenite D   | 15.03 | 153 |
| PHLDB1  | 23187  | Leukemia, MESH:D015470      | Dexameth     | 15.03 | 8   |
| PPFIA4  | 8497   | Leukemia, MESH:D015470      | Dexameth     | 15.03 | 9   |
| PPFIBP2 | 8495   | Leukemia, MESH:D015470      | Calcitriol C | 15.03 | 14  |
| RAD23A  | 5886   | Leukemia, MESH:D015473      | Arsenic Ar   | 15.03 | 167 |
| SIX6    | 4990   | Leukemia, MESH:D015473      | arsenite D   | 15.03 | 153 |
| SOX11   | 6664   | Leukemia, MESH:D015470      | Decitabine   | 15.03 | 14  |
| SPEN    | 23013  | Leukemia, MESH:D004915      | Doxorubic    | 15.03 | 2   |
| SRP72   | 6731   | Leukemia, MESH:D015470      | Dexameth     | 15.03 | 10  |
| SRSF11  | 9295   | Leukemia, MESH:D015470      | Dexameth     | 15.03 | 14  |
| UBE2J2  | 118424 | Leukemia, MESH:D015473      | Arsenic De   | 15.03 | 9   |
| WDR59   | 79726  | Leukemia, MESH:D015473      | Arsenic De   | 15.03 | 153 |
| ZDHHC7  | 55625  | Leukemia, MESH:D015473      | Arsenic De   | 15.03 | 156 |
| ELAVL1  | 1994   | Leukemia, MESH:D007948      | Arsenic Tr   | 15.02 | 3   |
| ENDOG   | 2021   | Leukemia, MESH:D007948      | pyrazolant   | 15.02 | 2   |
| EPB41L1 | 2036   | Leukemia, MESH:D015473      | Arsenic Tr   | 15.02 | 260 |
| MYO5A   | 4644   | Leukemia, MESH:D015473      | Arsenic ar:  | 15.02 | 158 |
| NRXN2   | 9379   | Leukemia, MESH:D015470      | Dexameth     | 15.02 | 13  |
| PDLIM4  | 8572   | Leukemia, MESH:D004915      | Cytarabine   | 15.02 | 3   |
| SPDL1   | 54908  | Leukemia, MESH:D015473      | Arsenic Ca   | 15.02 | 158 |
| XXYLT1  | 152002 | Leukemia, MESH:D015473      | Arsenic Ge   | 15.02 | 155 |
| ADORA1  | 134    | Leukemia, MESH:D015473      | Arsenic ar:  | 15.01 | 14  |
| AOX1    | 316    | Leukemia, MESH:D015473      | Dasatinib I  | 15.01 | 9   |
| CYP19A1 | 1588   | Leukemia, MESH:D015473      | arsenite Ci  | 15.01 | 158 |
| GRB14   | 2888   | Leukemia, MESH:D015473      | Arsenic ar:  | 15.01 | 157 |
| PCOLCE  | 5118   | Leukemia, MESH:D015473      | Arsenic Tr   | 15.01 | 260 |
| PCSK5   | 5125   | Leukemia, MESH:D007948      | Arsenic Tr   | 15.01 | 4   |
| PPT1    | 5538   | Leukemia, MESH:D015473      | Dexameth     | 15.01 | 155 |
| REG3B   | 18489  | Leukemia, MESH:D015470      | Cyclophos    | 15.01 | 11  |
| RIOK3   | 8780   | Leukemia, MESH:D015473      | Arsenic De   | 15.01 | 158 |
| TBK1    | 29110  | Leukemia, MESH:D015473      | Dexameth     | 15.01 | 155 |
| TRO     | 7216   | Leukemia, MESH:D015473      | arsenite D   | 15.01 | 154 |
| TUBA1A  | 7846   | Leukemia, MESH:D015473      | Calcitriol C | 15.01 | 9   |
| KLF9    | 687    | Leukemia, MESH:D015473      | Arsenic Tr   | 15    | 265 |
| SULT1C3 | 442038 | Leukemia, MESH:D015473      | Antimony     | 15    | 6   |
| TSPO    | 706    | Leukemia, MESH:D015473      | arsenite Cj  | 15    | 159 |
| VSIG4   | 11326  | Leukemia, MESH:D01marker/mi | Arsenic Tr   | 14.99 | 15  |
| ANP32B  | 10541  | Leukemia, MESH:D004915      | Doxorubic    | 14.99 | 2   |
| DBN1    | 1627   | Leukemia, MESH:D007948      | Arsenic Tr   | 14.99 | 4   |
| ILKAP   | 80895  | Leukemia, MESH:D015473      | Arsenic Tr   | 14.99 | 262 |
| MAPK13  | 5603   | Leukemia, MESH:D007948      | Arsenic Tr   | 14.99 | 3   |
| RGL1    | 23179  | Leukemia, MESH:D015473      | Arsenic Tr   | 14.99 | 166 |
| SRSF3   | 6428   | Leukemia, MESH:D015473      | arsenite sc  | 14.99 | 158 |
| TOB1    | 10140  | Leukemia, MESH:D015473      | Antimony     | 14.99 | 152 |
| USP22   | 23326  | Leukemia, MESH:D015470      | Methotrex    | 14.99 | 9   |
| WNT9B   | 7484   | Leukemia, MESH:D015473      | arsenic dis  | 14.99 | 5   |
| APIP    | 51074  | Leukemia, MESH:D015470      | Gasoline li  | 14.98 | 6   |
| ATP5J   | 11957  | Leukemia, MESH:D015470      | Doxorubic    | 14.98 | 11  |
| CDC7    | 8317   | Leukemia, MESH:D015473      | Arsenic Tr   | 14.98 | 261 |
| COL20A1 | 57642  | Leukemia, MESH:D015470      | Dronabinc    | 14.98 | 6   |
| PLLP    | 51090  | Leukemia, MESH:D004915      | Cytarabine   | 14.98 | 3   |
| SLC39A2 | 29986  | Leukemia, MESH:D015473      | Arsenic Ca   | 14.98 | 18  |
| TBL1X   | 6907   | Leukemia, MESH:D004915      | Doxorubic    | 14.98 | 3   |
| TESK2   | 10420  | Leukemia, MESH:D015470      | Dronabinc    | 14.98 | 6   |
| XKRX    | 402415 | Leukemia, MESH:D015473      | Arsenic ar:  | 14.98 | 10  |

|          |        |                        |              |       |     |
|----------|--------|------------------------|--------------|-------|-----|
| ANKZF1   | 55139  | Leukemia, MESH:D015470 | Dexameth     | 14.97 | 14  |
| ATP6V0A1 | 535    | Leukemia, MESH:D015470 | Dexameth     | 14.97 | 10  |
| ATP8B4   | 79895  | Leukemia, MESH:D015470 | Cytarabine   | 14.97 | 75  |
| CUTA     | 51596  | Leukemia, MESH:D015470 | Doxorubic    | 14.97 | 13  |
| EXTL2    | 2135   | Leukemia, MESH:D015470 | Doxorubic    | 14.97 | 21  |
| FAM217B  | 63939  | Leukemia, MESH:D015470 | Dronabinc    | 14.97 | 7   |
| FILIP1L  | 11259  | Leukemia, MESH:D015473 | Arsenic ars  | 14.97 | 157 |
| FMO3     | 2328   | Leukemia, MESH:D015470 | Dexameth     | 14.97 | 10  |
| GMNN     | 51053  | Leukemia, MESH:D015470 | Calcitriol C | 14.97 | 11  |
| ITIH2    | 3698   | Leukemia, MESH:D015470 | Dexameth     | 14.97 | 7   |
| LAMP3    | 27074  | Leukemia, MESH:D015473 | Dexameth     | 14.97 | 154 |
| LBR      | 3930   | Leukemia, MESH:D015473 | Calcitriol C | 14.97 | 156 |
| MARCO    | 8685   | Leukemia, MESH:D015470 | Decitabine   | 14.97 | 14  |
| MOBP     | 4336   | Leukemia, MESH:D015470 | Benzene C    | 14.97 | 22  |
| NUDCD2   | 134492 | Leukemia, MESH:D015470 | Dexameth     | 14.97 | 8   |
| PIGM     | 93183  | Leukemia, MESH:D015470 | Air Polluta  | 14.97 | 12  |
| PRICKLE1 | 144165 | Leukemia, MESH:D015473 | arsenite C   | 14.97 | 157 |
| RABGAP1I | 9910   | Leukemia, MESH:D015473 | Arsenic Ca   | 14.97 | 158 |
| RABIF    | 5877   | Leukemia, MESH:D015470 | Dexameth     | 14.97 | 14  |
| RPE      | 6120   | Leukemia, MESH:D015470 | Air Polluta  | 14.97 | 12  |
| RPS24    | 6229   | Leukemia, MESH:D015470 | Benzene Ir   | 14.97 | 24  |
| SNRPD1   | 6632   | Leukemia, MESH:D015470 | Dexameth     | 14.97 | 9   |
| SOCS7    | 30837  | Leukemia, MESH:D015470 | Cyclophos    | 14.97 | 13  |
| SPC24    | 147841 | Leukemia, MESH:D015473 | Calcitriol M | 14.97 | 155 |
| TMCO6    | 55374  | Leukemia, MESH:D015470 | Arsenic Tr   | 14.97 | 21  |
| TMEM259  | 91304  | Leukemia, MESH:D015470 | Doxorubic    | 14.97 | 13  |
| TUFM     | 7284   | Leukemia, MESH:D015470 | Doxorubic    | 14.97 | 22  |
| ZCCHC17  | 51538  | Leukemia, MESH:D015470 | Dexameth     | 14.97 | 6   |
| ZNHIT3   | 9326   | Leukemia, MESH:D015470 | Dexameth     | 14.97 | 7   |
| ABCC2    | 1244   | Leukemia, MESH:D007948 | 2-(2-amin    | 14.96 | 3   |
| ABHD17A  | 81926  | Leukemia, MESH:D015470 | Dronabinc    | 14.96 | 7   |
| ADAM10   | 102    | Leukemia, MESH:D015473 | Arsenic De   | 14.96 | 158 |
| ADGRG2   | 10149  | Leukemia, MESH:D015470 | Arsenic Tr   | 14.96 | 26  |
| ADGRG6   | 57211  | Leukemia, MESH:D015470 | Doxorubic    | 14.96 | 13  |
| CERS2    | 29956  | Leukemia, MESH:D015470 | Dronabinc    | 14.96 | 9   |
| CLUAP1   | 23059  | Leukemia, MESH:D015470 | Doxorubic    | 14.96 | 12  |
| CNTN1    | 1272   | Leukemia, MESH:D015473 | Arsenic Tr   | 14.96 | 262 |
| EDRF1    | 26098  | Leukemia, MESH:D015470 | Arsenic Tr   | 14.96 | 14  |
| FKBP14   | 55033  | Leukemia, MESH:D015470 | Doxorubic    | 14.96 | 13  |
| GPR155   | 151556 | Leukemia, MESH:D015470 | Dexameth     | 14.96 | 8   |
| HS3ST3A1 | 9955   | Leukemia, MESH:D015470 | Calcitriol C | 14.96 | 7   |
| MRNIP    | 51149  | Leukemia, MESH:D015470 | Calcitriol T | 14.96 | 7   |
| PQBP1    | 10084  | Leukemia, MESH:D015470 | Doxorubic    | 14.96 | 14  |
| PRAM1    | 84106  | Leukemia, MESH:D015470 | Arsenic Tr   | 14.96 | 12  |
| PTGFR    | 5737   | Leukemia, MESH:D015470 | Arsenic Tr   | 14.96 | 14  |
| PURG     | 29942  | Leukemia, MESH:D015470 | Arsenic Tr   | 14.96 | 12  |
| RCC1     | 1104   | Leukemia, MESH:D015470 | Doxorubic    | 14.96 | 14  |
| RPUSD3   | 285367 | Leukemia, MESH:D015470 | Decitabine   | 14.96 | 19  |
| SKP1     | 6500   | Leukemia, MESH:D015470 | Decitabine   | 14.96 | 14  |
| SLC66A3  | 130814 | Leukemia, MESH:D015470 | Dexameth     | 14.96 | 7   |
| STARD3NI | 83930  | Leukemia, MESH:D015470 | Dexameth     | 14.96 | 11  |
| TBCA     | 6902   | Leukemia, MESH:D015470 | Doxorubic    | 14.96 | 14  |
| TGFBR3   | 7049   | Leukemia, MESH:D007948 | Arsenic Tr   | 14.96 | 4   |
| ZBTB41   | 360023 | Leukemia, MESH:D015470 | Cyclophos    | 14.96 | 7   |
| AHSA2P   | 130872 | Leukemia, MESH:D015473 | Arsenic Ar   | 14.95 | 160 |
| AOAH     | 313    | Leukemia, MESH:D015470 | (+)-JQ1 c    | 14.95 | 7   |
| ATP9B    | 374868 | Leukemia, MESH:D015473 | Arsenic ars  | 14.95 | 10  |
| B3GALT2  | 8707   | Leukemia, MESH:D015470 | Doxorubic    | 14.95 | 13  |



|           |        |                        |              |       |     |
|-----------|--------|------------------------|--------------|-------|-----|
| CCNYL1    | 151195 | Leukemia, MESH:D015470 | (+)-JQ1 α    | 14.95 | 7   |
| CEP112    | 201134 | Leukemia, MESH:D015470 | Dexameth     | 14.95 | 6   |
| DGUOK     | 1716   | Leukemia, MESH:D015470 | Doxorubic    | 14.95 | 13  |
| FAM161A   | 84140  | Leukemia, MESH:D015470 | Dronabinc    | 14.95 | 7   |
| GUCD1     | 83606  | Leukemia, MESH:D015470 | Dexameth     | 14.95 | 11  |
| HOXA3     | 3200   | Leukemia, MESH:D015470 | Arsenic Tr   | 14.95 | 17  |
| JCAD      | 57608  | Leukemia, MESH:D015470 | Doxorubic    | 14.95 | 12  |
| KLHL3     | 26249  | Leukemia, MESH:D015470 | Dexameth     | 14.95 | 11  |
| MAN2B1    | 4125   | Leukemia, MESH:D004915 | Doxorubic    | 14.95 | 2   |
| NOL7      | 51406  | Leukemia, MESH:D015470 | Dexameth     | 14.95 | 11  |
| NOL8      | 55035  | Leukemia, MESH:D004915 | Doxorubic    | 14.95 | 2   |
| NR6A1     | 2649   | Leukemia, MESH:D015470 | Dexameth     | 14.95 | 7   |
| SEPTIN6   | 23157  | Leukemia, MESH:D004915 | Doxorubic    | 14.95 | 2   |
| SLX4      | 84464  | Leukemia, MESH:D015470 | Dexameth     | 14.95 | 11  |
| TLL2      | 7093   | Leukemia, MESH:D015473 | Arsenic Tr   | 14.95 | 258 |
| TOP2A     | 7153   | Leukemia, MESH:D004915 | Daunorub     | 14.95 | 2   |
| TRMT9B    | 57604  | Leukemia, MESH:D015470 | Doxorubic    | 14.95 | 12  |
| AHSP      | 51327  | Leukemia, MESH:D015473 | Arsenic Ge   | 14.94 | 9   |
| BAALC     | 79870  | Leukemia, MESH:D015473 | Arsenic Ar   | 14.94 | 261 |
| BAIAP2L2  | 80115  | Leukemia, MESH:D015473 | Calcitriol C | 14.94 | 152 |
| BCL2L2    | 599    | Leukemia, MESH:D015473 | Arsenic Tr   | 14.94 | 156 |
| PGM3      | 5238   | Leukemia, MESH:D015473 | Antimony     | 14.94 | 261 |
| FGF2      | 2247   | Leukemia, MESH:D004915 | Doxorubic    | 14.93 | 3   |
| WDR86     | 349136 | Leukemia, MESH:D015473 | Calcitriol C | 14.93 | 153 |
| AMACR     | 23600  | Leukemia, MESH:D015473 | Arsenic Tr   | 14.92 | 261 |
| CXCR2     | 3579   | Leukemia, MESH:D015470 | Air Polluta  | 14.92 | 18  |
| KIF18A    | 81930  | Leukemia, MESH:D015473 | arsenite Ci  | 14.92 | 157 |
| LIN52     | 91750  | Leukemia, MESH:D015473 | arsenite M   | 14.92 | 153 |
| MIR196B   | 442920 | Leukemia, MESH:D015473 | Arsenic Et   | 14.92 | 10  |
| MRPL27    | 51264  | Leukemia, MESH:D015473 | arsenite D   | 14.92 | 8   |
| OPA1      | 4976   | Leukemia, MESH:D015470 | Arsenic Tr   | 14.92 | 21  |
| OSCAR     | 126014 | Leukemia, MESH:D015473 | Arsenic Tr   | 14.92 | 260 |
| PDCD6IP   | 10015  | Leukemia, MESH:D015473 | Calcitriol C | 14.92 | 154 |
| PRKAR2B   | 5577   | Leukemia, MESH:D015473 | Arsenic ar   | 14.92 | 13  |
| SLC13A1   | 6561   | Leukemia, MESH:D015473 | arsenite D   | 14.92 | 6   |
| C1ORF21   | 81563  | Leukemia, MESH:D015473 | Calcitriol C | 14.91 | 153 |
| CCSER1    | 401145 | Leukemia, MESH:D015473 | Arsenic Ge   | 14.91 | 155 |
| DDC       | 1644   | Leukemia, MESH:D015473 | arsenite D   | 14.91 | 157 |
| ECI2      | 10455  | Leukemia, MESH:D015473 | arsenite D   | 14.91 | 157 |
| GREM1     | 26585  | Leukemia, MESH:D007948 | 2-(2-amin    | 14.91 | 2   |
| GSK3B     | 2932   | Leukemia, MESH:D007948 | 2-(2-amin    | 14.91 | 3   |
| IDH3G     | 3421   | Leukemia, MESH:D004915 | Doxorubic    | 14.91 | 2   |
| MIR491    | 574444 | Leukemia, MESH:D015470 | Arsenic Tr   | 14.91 | 28  |
| MKS1      | 54903  | Leukemia, MESH:D015473 | Calcitriol C | 14.91 | 153 |
| MRPS5     | 64969  | Leukemia, MESH:D015473 | Arsenic ar   | 14.91 | 10  |
| PFKMA     | 447836 | Leukemia, MESH:D015470 | Alitretinoi  | 14.91 | 6   |
| PHB2      | 11331  | Leukemia, MESH:D015470 | Doxorubic    | 14.91 | 20  |
| PLPP4     | 196051 | Leukemia, MESH:D015473 | Calcitriol C | 14.91 | 153 |
| TRIM27    | 5987   | Leukemia, MESH:D004915 | Doxorubic    | 14.91 | 2   |
| ARIH1     | 25820  | Leukemia, MESH:D004915 | Doxorubic    | 14.9  | 3   |
| CXADR     | 1525   | Leukemia, MESH:D015473 | Arsenic Ca   | 14.9  | 12  |
| DAPK3     | 1613   | Leukemia, MESH:D015470 | Decitabine   | 14.9  | 15  |
| EIF4ENIF1 | 56478  | Leukemia, MESH:D015473 | Arsenic De   | 14.9  | 155 |
| IPO5      | 3843   | Leukemia, MESH:D015473 | arsenite Ci  | 14.9  | 157 |
| MYL2      | 4633   | Leukemia, MESH:D004915 | Doxorubic    | 14.9  | 3   |
| PIK3R2    | 5296   | Leukemia, MESH:D015470 | Arsenic Tr   | 14.9  | 17  |
| WRNIP1    | 56897  | Leukemia, MESH:D015473 | caffeic aci  | 14.9  | 6   |
| ZNF430    | 80264  | Leukemia, MESH:D015473 | arsenite D   | 14.9  | 154 |

|          |        |                        |              |       |     |
|----------|--------|------------------------|--------------|-------|-----|
| ADAM12   | 8038   | Leukemia, MESH:D015470 | Dexameth     | 14.89 | 13  |
| ADCY3    | 109    | Leukemia, MESH:D015470 | Dexameth     | 14.89 | 9   |
| ADGRL2   | 23266  | Leukemia, MESH:D015470 | Dexameth     | 14.89 | 14  |
| CCNC     | 892    | Leukemia, MESH:D015470 | Calcitriol C | 14.89 | 8   |
| CSH1     | 1442   | Leukemia, MESH:D015470 | Arsenic Tr   | 14.89 | 18  |
| DUSP16   | 80824  | Leukemia, MESH:D015470 | Arsenic Tr   | 14.89 | 17  |
| IRAK3    | 11213  | Leukemia, MESH:D015470 | Doxorubic    | 14.89 | 13  |
| NTN4     | 59277  | Leukemia, MESH:D015470 | Doxorubic    | 14.89 | 14  |
| PCM1     | 5108   | Leukemia, MESH:D015470 | Arsenic Tr   | 14.89 | 13  |
| RPS6KA1  | 6195   | Leukemia, MESH:D007948 | pyrazolani   | 14.89 | 2   |
| SH3GLB1  | 51100  | Leukemia, MESH:D015470 | Calcitriol C | 14.89 | 14  |
| SLC39A6  | 25800  | Leukemia, MESH:D015470 | Calcitriol C | 14.89 | 12  |
| STX1A    | 6804   | Leukemia, MESH:D015470 | Doxorubic    | 14.89 | 15  |
| WDR43    | 23160  | Leukemia, MESH:D015470 | Dexameth     | 14.89 | 9   |
| CBX5     | 23468  | Leukemia, MESH:D015473 | Genistein I  | 14.88 | 155 |
| FNBP1    | 23048  | Leukemia, MESH:D015473 | arsenite D   | 14.88 | 7   |
| SLC16A9B | 445158 | Leukemia, MESH:D015470 | Dronabinc    | 14.88 | 5   |
| SLC28A3  | 64078  | Leukemia, MESH:D015473 | Arsenic Tr   | 14.88 | 153 |
| UGT2B    | 24862  | Leukemia, MESH:D015470 | Alitretinoi  | 14.88 | 8   |
| ZNF333   | 84449  | Leukemia, MESH:D015470 | Arsenic Tr   | 14.88 | 18  |
| ZNF700   | 90592  | Leukemia, MESH:D015470 | Benzene T    | 14.88 | 19  |
| CRB2     | 286204 | Leukemia, MESH:D015470 | Dronabinc    | 14.87 | 6   |
| EIF2S3   | 1968   | Leukemia, MESH:D015473 | Calcitriol s | 14.87 | 156 |
| FHL5     | 9457   | Leukemia, MESH:D015470 | Dronabinc    | 14.87 | 8   |
| GCM1     | 8521   | Leukemia, MESH:D015470 | Dronabinc    | 14.87 | 9   |
| MCF2L    | 23263  | Leukemia, MESH:D015473 | Arsenic Ar   | 14.87 | 159 |
| METRNL   | 284207 | Leukemia, MESH:D015473 | Arsenic Ca   | 14.87 | 157 |
| NDUFS4   | 4724   | Leukemia, MESH:D015473 | arsenite D   | 14.87 | 8   |
| NET1     | 10276  | Leukemia, MESH:D015473 | Calcitriol C | 14.87 | 153 |
| OPTN     | 10133  | Leukemia, MESH:D007948 | Arsenic Tr   | 14.87 | 3   |
| ZNF69    | 7620   | Leukemia, MESH:D015470 | Doxorubic    | 14.87 | 10  |
| ABI3     | 51225  | Leukemia, MESH:D015470 | Air Polluta  | 14.86 | 5   |
| DDR2     | 4921   | Leukemia, MESH:D007948 | Arsenic Tr   | 14.86 | 4   |
| DYNLT5   | 200132 | Leukemia, MESH:D015470 | Decitabine   | 14.86 | 11  |
| EDEM1    | 9695   | Leukemia, MESH:D015473 | Arsenic Ar   | 14.86 | 263 |
| EIF4B    | 1975   | Leukemia, MESH:D007948 | Arsenic Tr   | 14.86 | 3   |
| FAM161B  | 145483 | Leukemia, MESH:D015470 | Dronabinc    | 14.86 | 10  |
| FAM81A   | 145773 | Leukemia, MESH:D015470 | Calcitriol C | 14.86 | 11  |
| KIF9     | 64147  | Leukemia, MESH:D015470 | Bortezomi    | 14.86 | 10  |
| MIR205HC | 642587 | Leukemia, MESH:D015470 | Methotrex    | 14.86 | 7   |
| NDRG4    | 65009  | Leukemia, MESH:D015473 | Arsenic Tr   | 14.86 | 262 |
| NEK3     | 4752   | Leukemia, MESH:D015470 | Doxorubic    | 14.86 | 11  |
| PODXL2   | 50512  | Leukemia, MESH:D015470 | Cytarabine   | 14.86 | 74  |
| RAB22A   | 57403  | Leukemia, MESH:D015470 | Benzene C    | 14.86 | 26  |
| ATP13A1  | 57130  | Leukemia, MESH:D015470 | Doxorubic    | 14.85 | 13  |
| C12ORF54 | 121273 | Leukemia, MESH:D015473 | Arsenic ar:  | 14.85 | 9   |
| CDK20    | 23552  | Leukemia, MESH:D015470 | Doxorubic    | 14.85 | 11  |
| CDKL3    | 51265  | Leukemia, MESH:D015470 | Dexameth     | 14.85 | 6   |
| CISD2    | 493856 | Leukemia, MESH:D015470 | Dexameth     | 14.85 | 14  |
| CNIH3    | 149111 | Leukemia, MESH:D015470 | Dexameth     | 14.85 | 7   |
| DNAJB14  | 79982  | Leukemia, MESH:D015470 | Calcitriol C | 14.85 | 8   |
| DNHD1    | 144132 | Leukemia, MESH:D015470 | Dexameth     | 14.85 | 6   |
| FIGNL1   | 63979  | Leukemia, MESH:D015473 | arsenite C:  | 14.85 | 155 |
| KCTD6    | 200845 | Leukemia, MESH:D015470 | Arsenic Tr   | 14.85 | 18  |
| LSM12    | 124801 | Leukemia, MESH:D015470 | Air Polluta  | 14.85 | 18  |
| MEIS3    | 56917  | Leukemia, MESH:D015470 | Dexameth     | 14.85 | 13  |
| PDCD2L   | 84306  | Leukemia, MESH:D015470 | Doxorubic    | 14.85 | 13  |
| PKN3     | 29941  | Leukemia, MESH:D015470 | Dexameth     | 14.85 | 7   |

|           |        |                            |              |       |     |
|-----------|--------|----------------------------|--------------|-------|-----|
| POLL      | 27343  | Leukemia, MESH:D015470     | Decitabine   | 14.85 | 18  |
| PIIP5K1   | 9677   | Leukemia, MESH:D015470     | Calcitriol C | 14.85 | 11  |
| PRAF2     | 11230  | Leukemia, MESH:D015470     | Doxorubic    | 14.85 | 12  |
| RWDD1     | 51389  | Leukemia, MESH:D015473     | Arsenic Cy   | 14.85 | 18  |
| SLC35F1   | 222553 | Leukemia, MESH:D015470     | Doxorubic    | 14.85 | 12  |
| SLC51A    | 200931 | Leukemia, MESH:D015473     | caffeic aci  | 14.85 | 151 |
| SYNPO2L   | 79933  | Leukemia, MESH:D015473     | Arsenic ar   | 14.85 | 9   |
| TIAM2     | 26230  | Leukemia, MESH:D015470     | Doxorubic    | 14.85 | 11  |
| TOMM22    | 56993  | Leukemia, MESH:D015470     | Indometha    | 14.85 | 9   |
| TTC8      | 123016 | Leukemia, MESH:D015470     | Doxorubic    | 14.85 | 12  |
| ZNF175    | 7728   | Leukemia, MESH:D015470     | Doxorubic    | 14.85 | 12  |
| ZNF25     | 219749 | Leukemia, MESH:D015470     | Doxorubic    | 14.85 | 11  |
| ACTA2     | 59     | Leukemia, MESH:D007948     | Arsenic Tr   | 14.84 | 3   |
| AJAP1     | 55966  | Leukemia, MESH:D015470     | Methotrex    | 14.84 | 9   |
| CADM2     | 253559 | Leukemia, MESH:D015470     | Dexameth     | 14.84 | 7   |
| CCDC59    | 29080  | Leukemia, MESH:D015470     | Dexameth     | 14.84 | 6   |
| CENPK     | 64105  | Leukemia, MESH:D015473     | Calcitriol C | 14.84 | 152 |
| CHI3L1    | 1116   | Leukemia, MESH:D007948     | 2-(2-amin    | 14.84 | 3   |
| COA3      | 28958  | Leukemia, MESH:D015470     | Dexameth     | 14.84 | 11  |
| DCUN1D5   | 84259  | Leukemia, MESH:D015470     | Doxorubic    | 14.84 | 13  |
| EXOC4     | 60412  | Leukemia, MESH:D004915     | Doxorubic    | 14.84 | 2   |
| GMEB1     | 10691  | Leukemia, MESH:D015470     | Doxorubic    | 14.84 | 12  |
| GUSBP2    | 387036 | Leukemia, MESH:D015470     | Dexameth     | 14.84 | 5   |
| IKBKE     | 9641   | Leukemia, MESH:D015473     | Arsenic Ca   | 14.84 | 21  |
| KANSL1L   | 151050 | Leukemia, MESH:D015470     | Doxorubic    | 14.84 | 12  |
| KLC2      | 64837  | Leukemia, MESH:D015470     | Dexameth     | 14.84 | 11  |
| LINC00174 | 285908 | Leukemia, MESH:D015470     | Dexameth     | 14.84 | 5   |
| LMAN2     | 10960  | Leukemia, MESH:D015470     | Dexameth     | 14.84 | 8   |
| MED18     | 54797  | Leukemia, MESH:D015470     | Dexameth     | 14.84 | 7   |
| NBEA      | 26960  | Leukemia, MESH:D015470     | Doxorubic    | 14.84 | 12  |
| PCDH12    | 51294  | Leukemia, MESH:D015470     | Dexameth     | 14.84 | 12  |
| PDE3A     | 5139   | Leukemia, MESH:D015473     | Arsenic Ca   | 14.84 | 155 |
| PGBD5     | 79605  | Leukemia, MESH:D015470     | Calcitriol C | 14.84 | 12  |
| RIMBP2    | 23504  | Leukemia, MESH:D015470     | Arsenic Tr   | 14.84 | 12  |
| SLC10A2   | 6555   | Leukemia, MESH:D015473     | Calcitriol C | 14.84 | 7   |
| TCHP      | 84260  | Leukemia, MESH:D015470     | Indometha    | 14.84 | 9   |
| TDH       | 157739 | Leukemia, MESH:D015470     | Dexameth     | 14.84 | 7   |
| TIMM50    | 92609  | Leukemia, MESH:D015470     | Doxorubic    | 14.84 | 13  |
| TIMM8A    | 1678   | Leukemia, MESH:D015470     | Resveratrc   | 14.84 | 9   |
| TMEM131   | 23240  | Leukemia, MESH:D015470     | Dronabinc    | 14.84 | 7   |
| TMEM170   | 1E+08  | Leukemia, MESH:D015470     | Dexameth     | 14.84 | 7   |
| UMAD1     | 729852 | Leukemia, MESH:D015470     | Dexameth     | 14.84 | 10  |
| ZNF224    | 7767   | Leukemia, MESH:D015470     | Arsenic Tr   | 14.84 | 12  |
| ITGAX     | 3687   | Leukemia, MESH:D01marker/m | Arsenic Tr   | 14.83 | 262 |
| ACE2      | 59272  | Leukemia, MESH:D015470     | Chlorampl    | 14.83 | 24  |
| ASGR1     | 432    | Leukemia, MESH:D015470     | Decitabine   | 14.83 | 13  |
| CDX1      | 1044   | Leukemia, MESH:D015473     | Arsenic Tr   | 14.83 | 259 |
| EFEMP2    | 30008  | Leukemia, MESH:D004915     | Cytarabine   | 14.83 | 3   |
| EPN2      | 22905  | Leukemia, MESH:D004915     | Doxorubic    | 14.83 | 2   |
| FAM184A   | 79632  | Leukemia, MESH:D015470     | Dexameth     | 14.83 | 7   |
| FCGR3     | 14131  | Leukemia, MESH:D015470     | Cyclophos    | 14.83 | 13  |
| HCFC1     | 3054   | Leukemia, MESH:D004915     | Doxorubic    | 14.83 | 2   |
| MIR223    | 407008 | Leukemia, MESH:D015473     | Arsenic Tr   | 14.83 | 260 |
| MLST8     | 64223  | Leukemia, MESH:D015470     | Doxorubic    | 14.83 | 12  |
| NARS1     | 4677   | Leukemia, MESH:D015470     | Air Polluta  | 14.83 | 15  |
| NFATC4    | 4776   | Leukemia, MESH:D015470     | Carboplati   | 14.83 | 9   |
| PLAC1     | 10761  | Leukemia, MESH:D015473     | Arsenic Tr   | 14.83 | 261 |
| RPS7      | 6201   | Leukemia, MESH:D015473     | arsenite Bi  | 14.83 | 155 |

|          |        |                        |              |       |     |
|----------|--------|------------------------|--------------|-------|-----|
| SPRED2   | 200734 | Leukemia, MESH:D015470 | Benzoates    | 14.83 | 13  |
| TOB2     | 10766  | Leukemia, MESH:D004915 | Doxorubic    | 14.83 | 2   |
| UBAP2L   | 9898   | Leukemia, MESH:D004915 | Doxorubic    | 14.83 | 2   |
| VAMP2    | 6844   | Leukemia, MESH:D015470 | Dexameth     | 14.83 | 15  |
| ZNF354C  | 30832  | Leukemia, MESH:D015470 | Doxorubic    | 14.83 | 10  |
| ZNF814   | 730051 | Leukemia, MESH:D015470 | Doxorubic    | 14.83 | 11  |
| ALDH7A1  | 501    | Leukemia, MESH:D015470 | Arsenic Tr   | 14.82 | 20  |
| ATG12    | 9140   | Leukemia, MESH:D007948 | 2-(2-amin    | 14.82 | 3   |
| CHD2     | 1106   | Leukemia, MESH:D015473 | Arsenic Ar   | 14.82 | 160 |
| CPLX2    | 10814  | Leukemia, MESH:D015470 | Dexameth     | 14.82 | 7   |
| CSNK1D   | 1453   | Leukemia, MESH:D015470 | Arsenic Tr   | 14.82 | 80  |
| DOCK9    | 23348  | Leukemia, MESH:D015470 | Air Polluta  | 14.82 | 13  |
| EBAG9    | 9166   | Leukemia, MESH:D015473 | arsenite D   | 14.82 | 6   |
| FLOT1    | 10211  | Leukemia, MESH:D015470 | Dexameth     | 14.82 | 14  |
| GCAT     | 23464  | Leukemia, MESH:D015470 | Dexameth     | 14.82 | 14  |
| GSTK1    | 373156 | Leukemia, MESH:D015470 | Decitabine   | 14.82 | 19  |
| HSD17B12 | 51144  | Leukemia, MESH:D015470 | Calcitriol C | 14.82 | 13  |
| LRRC59   | 55379  | Leukemia, MESH:D015470 | Arsenic Tr   | 14.82 | 19  |
| MID1     | 4281   | Leukemia, MESH:D015470 | Doxorubic    | 14.82 | 13  |
| MYOD1    | 4654   | Leukemia, MESH:D015470 | Azacitidine  | 14.82 | 11  |
| NEFL     | 4747   | Leukemia, MESH:D015473 | Arsenic ar   | 14.82 | 158 |
| NFIB     | 4781   | Leukemia, MESH:D015470 | Benzene C    | 14.82 | 96  |
| NPR2     | 4882   | Leukemia, MESH:D015470 | Dexameth     | 14.82 | 12  |
| RALGDS   | 5900   | Leukemia, MESH:D015470 | Decitabine   | 14.82 | 19  |
| RETREG1  | 54463  | Leukemia, MESH:D015470 | Dexameth     | 14.82 | 12  |
| TOR1A    | 1861   | Leukemia, MESH:D004915 | Doxorubic    | 14.82 | 3   |
| UBE2B    | 7320   | Leukemia, MESH:D015470 | Arsenic Tr   | 14.82 | 19  |
| WNT11    | 7481   | Leukemia, MESH:D015470 | Dexameth     | 14.82 | 12  |
| HSP70.3  | 30671  | Leukemia, MESH:D015473 | Arsenic Ar   | 14.81 | 263 |
| METTL14  | 57721  | Leukemia, MESH:D015473 | arsenite G   | 14.81 | 154 |
| MIRLET7D | 406886 | Leukemia, MESH:D015473 | Arsenic Ar   | 14.81 | 263 |
| RNF220   | 55182  | Leukemia, MESH:D015473 | Arsenic ar   | 14.81 | 10  |
| RPS15A   | 6210   | Leukemia, MESH:D015473 | Arsenic Tr   | 14.81 | 262 |
| TERC     | 7012   | Leukemia, MESH:D015473 | Arsenic Ar   | 14.81 | 263 |
| TXLNB    | 167838 | Leukemia, MESH:D015473 | Arsenic ar   | 14.81 | 156 |
| WT1-AS   | 51352  | Leukemia, MESH:D015473 | sodium ar    | 14.81 | 155 |
| DBF4     | 10926  | Leukemia, MESH:D015473 | arsenite Ci  | 14.8  | 155 |
| ETFA     | 2108   | Leukemia, MESH:D007948 | Arsenic Tr   | 14.8  | 3   |
| EXOG     | 9941   | Leukemia, MESH:D015473 | Arsenic Tr   | 14.8  | 262 |
| PAMR1    | 25891  | Leukemia, MESH:D004915 | Cytarabine   | 14.8  | 2   |
| PARM1    | 25849  | Leukemia, MESH:D004915 | Cytarabine   | 14.8  | 2   |
| PSPH     | 5723   | Leukemia, MESH:D015473 | Antimony     | 14.8  | 260 |
| PTEN     | 5728   | Leukemia, MESH:D004915 | Cytarabine   | 14.8  | 2   |
| RAX      | 30062  | Leukemia, MESH:D015473 | arsenite D   | 14.8  | 154 |
| VEGFA    | 7422   | Leukemia, MESH:D004915 | Daunorub     | 14.8  | 3   |
| DDX39A   | 10212  | Leukemia, MESH:D015473 | Calcitriol C | 14.79 | 153 |
| EPOR     | 2057   | Leukemia, MESH:D015473 | Arsenic Tr   | 14.79 | 260 |
| FAM180A  | 389558 | Leukemia, MESH:D015473 | arsenite D   | 14.79 | 5   |
| GDF15    | 9518   | Leukemia, MESH:D004915 | Daunorub     | 14.79 | 2   |
| GPC3     | 2719   | Leukemia, MESH:D015473 | Arsenic Tr   | 14.79 | 259 |
| LIN7A    | 8825   | Leukemia, MESH:D015473 | Calcitriol C | 14.79 | 153 |
| TFDP1    | 7027   | Leukemia, MESH:D007948 | Arsenic Tr   | 14.79 | 3   |
| OLFML3   | 56944  | Leukemia, MESH:D007948 | Arsenic Tr   | 14.78 | 4   |
| TMSB4X   | 7114   | Leukemia, MESH:D015473 | Dexameth     | 14.78 | 155 |
| ZYX      | 7791   | Leukemia, MESH:D015473 | arsenite Ci  | 14.78 | 154 |
| CLIC1    | 1192   | Leukemia, MESH:D015473 | Arsenic ar   | 14.77 | 159 |
| MAPK6    | 5597   | Leukemia, MESH:D015470 | Air Polluta  | 14.77 | 9   |
| MLKL     | 197259 | Leukemia, MESH:D015473 | Dexameth     | 14.77 | 155 |

|          |        |                        |              |       |     |
|----------|--------|------------------------|--------------|-------|-----|
| MPG      | 4350   | Leukemia, MESH:D015470 | Bezafibrat   | 14.77 | 14  |
| RPL23    | 9349   | Leukemia, MESH:D015473 | Arsenic Tr   | 14.77 | 262 |
| SCD2     | 20250  | Leukemia, MESH:D015473 | Arsenic De   | 14.77 | 11  |
| SCG5     | 6447   | Leukemia, MESH:D015470 | Decitabine   | 14.77 | 17  |
| TRA2B    | 6434   | Leukemia, MESH:D015473 | Arsenic Ar   | 14.77 | 264 |
| UMPS     | 7372   | Leukemia, MESH:D015473 | Arsenic ar:  | 14.77 | 156 |
| YWHAQ    | 10971  | Leukemia, MESH:D015473 | Arsenic Tr   | 14.77 | 155 |
| COG5     | 10466  | Leukemia, MESH:D015470 | Arsenic Tr   | 14.76 | 18  |
| CSNK1E   | 1454   | Leukemia, MESH:D015470 | Benzene C    | 14.76 | 22  |
| FXR1     | 8087   | Leukemia, MESH:D015470 | Doxorubic    | 14.76 | 13  |
| HSPB11   | 51668  | Leukemia, MESH:D015470 | Decitabine   | 14.76 | 18  |
| KDELR1   | 10945  | Leukemia, MESH:D015473 | Arsenic ar:  | 14.76 | 9   |
| MTUS1    | 57509  | Leukemia, MESH:D007948 | Arsenic Tr   | 14.76 | 4   |
| RASA3    | 22821  | Leukemia, MESH:D015470 | Azacididine  | 14.76 | 8   |
| SLC13A5  | 284111 | Leukemia, MESH:D015470 | Decitabine   | 14.76 | 20  |
| SYDE2    | 84144  | Leukemia, MESH:D015470 | Doxorubic    | 14.76 | 11  |
| SYT15    | 83849  | Leukemia, MESH:D015473 | Dasatinib    | 14.76 | 152 |
| SYT8     | 90019  | Leukemia, MESH:D015470 | Calcitriol C | 14.76 | 5   |
| TRIM28   | 10155  | Leukemia, MESH:D015470 | Doxorubic    | 14.76 | 16  |
| WASHC4   | 23325  | Leukemia, MESH:D015470 | Air Polluta  | 14.76 | 9   |
| ADAM17   | 6868   | Leukemia, MESH:D007948 | pyrazolani   | 14.75 | 2   |
| ADAM9    | 8754   | Leukemia, MESH:D015470 | Dexameth     | 14.75 | 11  |
| ATP5MF   | 9551   | Leukemia, MESH:D015470 | Doxorubic    | 14.75 | 10  |
| COX16    | 51241  | Leukemia, MESH:D015470 | Dexameth     | 14.75 | 6   |
| DSG3     | 1830   | Leukemia, MESH:D015473 | Calcitriol C | 14.75 | 5   |
| GRINA    | 2907   | Leukemia, MESH:D015470 | Dexameth     | 14.75 | 10  |
| H4C11    | 8363   | Leukemia, MESH:D015473 | Arsenic Ar   | 14.75 | 157 |
| HOXB4    | 3214   | Leukemia, MESH:D015473 | Arsenic Cy   | 14.75 | 157 |
| IPO4     | 79711  | Leukemia, MESH:D015470 | Dexameth     | 14.75 | 13  |
| MAGI2    | 9863   | Leukemia, MESH:D015470 | Decitabine   | 14.75 | 19  |
| MALT1    | 10892  | Leukemia, MESH:D015470 | Calcitriol C | 14.75 | 15  |
| MED24    | 9862   | Leukemia, MESH:D015470 | Doxorubic    | 14.75 | 12  |
| NETO1    | 81832  | Leukemia, MESH:D015470 | Calcitriol C | 14.75 | 13  |
| PPP2R1B  | 5519   | Leukemia, MESH:D015470 | Dexameth     | 14.75 | 8   |
| PSMA7    | 5688   | Leukemia, MESH:D015470 | Arsenic Tr   | 14.75 | 18  |
| SHANK3   | 85358  | Leukemia, MESH:D015470 | Decitabine   | 14.75 | 19  |
| SLC6A13  | 6540   | Leukemia, MESH:D015470 | Dronabinc    | 14.75 | 9   |
| SNAP23   | 8773   | Leukemia, MESH:D015470 | Resveratrc   | 14.75 | 11  |
| SPAG9    | 9043   | Leukemia, MESH:D015470 | Benzene C    | 14.75 | 22  |
| SPEG     | 10290  | Leukemia, MESH:D004915 | Doxorubic    | 14.75 | 2   |
| TAF5L    | 27097  | Leukemia, MESH:D015470 | Doxorubic    | 14.75 | 14  |
| TCF21    | 6943   | Leukemia, MESH:D004915 | Cytarabine   | 14.75 | 3   |
| TPCN2    | 219931 | Leukemia, MESH:D015470 | Benzene T    | 14.75 | 23  |
| TRAC     | 28755  | Leukemia, MESH:D015470 | Dronabinc    | 14.75 | 7   |
| TRIM59   | 286827 | Leukemia, MESH:D015470 | Calcitriol F | 14.75 | 10  |
| ZNF229   | 7772   | Leukemia, MESH:D015473 | Arsenic M    | 14.75 | 8   |
| ABCC8    | 6833   | Leukemia, MESH:D015473 | Dexameth     | 14.74 | 7   |
| ACVR1B   | 91     | Leukemia, MESH:D015473 | Arsenic ar:  | 14.74 | 154 |
| ALPK3    | 57538  | Leukemia, MESH:D015470 | Calcitriol C | 14.74 | 12  |
| C12ORF73 | 728568 | Leukemia, MESH:D015473 | Arsenic ar:  | 14.74 | 154 |
| CCDC71L  | 168455 | Leukemia, MESH:D015470 | Dexameth     | 14.74 | 8   |
| CNIH1    | 10175  | Leukemia, MESH:D015470 | Air Polluta  | 14.74 | 12  |
| DDX28    | 55794  | Leukemia, MESH:D015470 | Decitabine   | 14.74 | 15  |
| DGCR6    | 8214   | Leukemia, MESH:D015470 | Doxorubic    | 14.74 | 13  |
| GABRR1   | 2569   | Leukemia, MESH:D015470 | Arsenic Tr   | 14.74 | 12  |
| HPS4     | 89781  | Leukemia, MESH:D015470 | Doxorubic    | 14.74 | 13  |
| KCNK12   | 56660  | Leukemia, MESH:D015470 | Arsenic Tr   | 14.74 | 14  |
| LAMC1    | 3915   | Leukemia, MESH:D007948 | Arsenic Tr   | 14.74 | 3   |

|          |        |                            |              |       |     |
|----------|--------|----------------------------|--------------|-------|-----|
| LRR3B    | 116135 | Leukemia, MESH:D015470     | Arsenic Tr   | 14.74 | 18  |
| LSM14B   | 149986 | Leukemia, MESH:D015470     | Methotrex    | 14.74 | 9   |
| MEX3D    | 399664 | Leukemia, MESH:D015470     | Arsenic Tr   | 14.74 | 18  |
| NBN      | 4683   | Leukemia, MESH:D015473     | Arsenic Tr   | 14.74 | 260 |
| PDIA2    | 64714  | Leukemia, MESH:D015470     | Dexameth     | 14.74 | 6   |
| PHKG2    | 5261   | Leukemia, MESH:D015470     | Arsenic Tr   | 14.74 | 17  |
| PLEKHM3  | 389072 | Leukemia, MESH:D015470     | Doxorubic    | 14.74 | 11  |
| PRKRIP1  | 79706  | Leukemia, MESH:D015470     | Doxorubic    | 14.74 | 12  |
| SCRG1    | 11341  | Leukemia, MESH:D015470     | Indometha    | 14.74 | 8   |
| SMARCC2  | 6601   | Leukemia, MESH:D015470     | Doxorubic    | 14.74 | 12  |
| SNHG32   | 50854  | Leukemia, MESH:D015470     | Arsenic Tr   | 14.74 | 19  |
| SUCLG2   | 8801   | Leukemia, MESH:D015473     | Arsenic Tr   | 14.74 | 155 |
| SYDE1    | 85360  | Leukemia, MESH:D015470     | Calcitriol C | 14.74 | 11  |
| TAGAP    | 117289 | Leukemia, MESH:D015470     | Arsenic Tr   | 14.74 | 12  |
| TMEM131  | 23505  | Leukemia, MESH:D015470     | Doxorubic    | 14.74 | 15  |
| TRUB1    | 142940 | Leukemia, MESH:D015470     | Arsenic Tr   | 14.74 | 13  |
| TXN2     | 25828  | Leukemia, MESH:D015473     | Arsenic Ar   | 14.74 | 161 |
| ZKSCAN5  | 23660  | Leukemia, MESH:D015470     | Doxorubic    | 14.74 | 11  |
| ZSWIM5   | 57643  | Leukemia, MESH:D015470     | Doxorubic    | 14.74 | 10  |
| AARD     | 441376 | Leukemia, MESH:D015473     | Calcitriol C | 14.73 | 153 |
| ATP2C2   | 9914   | Leukemia, MESH:D015470     | Methotrex    | 14.73 | 9   |
| BEGAIN   | 57596  | Leukemia, MESH:D015470     | Dexameth     | 14.73 | 7   |
| BEND7    | 222389 | Leukemia, MESH:D015470     | Doxorubic    | 14.73 | 13  |
| CDC40    | 51362  | Leukemia, MESH:D015470     | Dexameth     | 14.73 | 11  |
| CHST4    | 10164  | Leukemia, MESH:D015470     | (+)-JQ1 c    | 14.73 | 7   |
| COX5A    | 9377   | Leukemia, MESH:D015473     | Arsenic Ar   | 14.73 | 161 |
| CYP4A14  | 13119  | Leukemia, MESH:D015470     | Allopurinc   | 14.73 | 13  |
| CYP4F11  | 57834  | Leukemia, MESH:D015473     | Arsenic Tr   | 14.73 | 261 |
| DGAT1    | 8694   | Leukemia, MESH:D015470     | Air Polluta  | 14.73 | 16  |
| DSC2     | 1824   | Leukemia, MESH:D007948     | Arsenic Tr   | 14.73 | 4   |
| EBF1     | 1879   | Leukemia, MESH:D015473     | arsenite D   | 14.73 | 155 |
| EID2     | 163126 | Leukemia, MESH:D015470     | Dexameth     | 14.73 | 12  |
| EXOSC10  | 5394   | Leukemia, MESH:D015470     | Dexameth     | 14.73 | 9   |
| FAM53C   | 51307  | Leukemia, MESH:D015470     | Dronabinc    | 14.73 | 6   |
| GRAMD4   | 23151  | Leukemia, MESH:D015470     | Calcitriol C | 14.73 | 11  |
| HOXC10   | 3226   | Leukemia, MESH:D015473     | arsenite D   | 14.73 | 152 |
| HSD17B11 | 51170  | Leukemia, MESH:D015473     | arsenite C   | 14.73 | 155 |
| INTS6L   | 203522 | Leukemia, MESH:D015473     | Arsenic Ca   | 14.73 | 9   |
| KLRD1    | 3824   | Leukemia, MESH:D015473     | arsenite D   | 14.73 | 6   |
| OXNAD1   | 92106  | Leukemia, MESH:D015470     | Doxorubic    | 14.73 | 12  |
| PIK3C3   | 5289   | Leukemia, MESH:D015473     | Arsenic Tr   | 14.73 | 155 |
| RHNO1    | 83695  | Leukemia, MESH:D015470     | Doxorubic    | 14.73 | 13  |
| RNF130   | 55819  | Leukemia, MESH:D015470     | Dexameth     | 14.73 | 7   |
| SHPRH    | 257218 | Leukemia, MESH:D015470     | Dexameth     | 14.73 | 7   |
| SSTR5    | 6755   | Leukemia, MESH:D015470     | Decitabine   | 14.73 | 12  |
| SUSD6    | 9766   | Leukemia, MESH:D015470     | Doxorubic    | 14.73 | 12  |
| UTP11    | 51118  | Leukemia, MESH:D015470     | Dexameth     | 14.73 | 8   |
| YIPF3    | 25844  | Leukemia, MESH:D015470     | Dexameth     | 14.73 | 11  |
| RAP1GAP  | 5909   | Leukemia, MESH:D01marker/m | Arsenic ar   | 14.72 | 158 |
| ARHGEF2  | 9181   | Leukemia, MESH:D015473     | Arsenic De   | 14.72 | 158 |
| BPTF     | 2186   | Leukemia, MESH:D004915     | Doxorubic    | 14.72 | 2   |
| BSG      | 682    | Leukemia, MESH:D007948     | 2-(2-amin    | 14.72 | 3   |
| CEP44    | 80817  | Leukemia, MESH:D015473     | arsenite G   | 14.72 | 154 |
| COL24A1  | 255631 | Leukemia, MESH:D015470     | Dexameth     | 14.72 | 12  |
| ECHDC2   | 55268  | Leukemia, MESH:D004915     | Doxorubic    | 14.72 | 2   |
| EEFSEC   | 60678  | Leukemia, MESH:D015473     | Arsenic Ar   | 14.72 | 263 |
| FAF2     | 23197  | Leukemia, MESH:D015473     | Arsenic De   | 14.72 | 9   |
| FUBP3    | 8939   | Leukemia, MESH:D015470     | Dexameth     | 14.72 | 12  |

|           |        |                        |              |       |     |
|-----------|--------|------------------------|--------------|-------|-----|
| GAD2      | 2572   | Leukemia, MESH:D015473 | Arsenic ar   | 14.72 | 157 |
| MTCL1     | 23255  | Leukemia, MESH:D015470 | Dexameth     | 14.72 | 12  |
| PCYT1B    | 9468   | Leukemia, MESH:D015473 | Genistein l  | 14.72 | 152 |
| PDE4A     | 5141   | Leukemia, MESH:D015473 | Arsenic Tr   | 14.72 | 262 |
| PHYH      | 5264   | Leukemia, MESH:D015473 | Arsenic M    | 14.72 | 157 |
| RFC1      | 5981   | Leukemia, MESH:D004915 | Doxorubic    | 14.72 | 2   |
| RPS6KA5   | 9252   | Leukemia, MESH:D015473 | arsenite C   | 14.72 | 155 |
| SIM1      | 6492   | Leukemia, MESH:D015473 | arsenite M   | 14.72 | 153 |
| TEX9      | 374618 | Leukemia, MESH:D015473 | arsenite M   | 14.72 | 153 |
| TPSAB1    | 7177   | Leukemia, MESH:D015473 | Genistein l  | 14.72 | 152 |
| UBE4B     | 10277  | Leukemia, MESH:D004915 | Doxorubic    | 14.72 | 2   |
| WVOX      | 51741  | Leukemia, MESH:D015473 | Arsenic Ar   | 14.72 | 263 |
| YWHAH     | 7533   | Leukemia, MESH:D015473 | Arsenic Tr   | 14.72 | 261 |
| CBLN2     | 147381 | Leukemia, MESH:D015473 | Calcitriol C | 14.71 | 153 |
| CXCR1     | 3577   | Leukemia, MESH:D015470 | Air Polluta  | 14.71 | 14  |
| HOXD4     | 3233   | Leukemia, MESH:D015473 | Arsenic Tr   | 14.71 | 260 |
| IL1A      | 3552   | Leukemia, MESH:D007948 | 2-(2-amin    | 14.71 | 3   |
| NOS3      | 4846   | Leukemia, MESH:D007948 | 2-(2-amin    | 14.71 | 3   |
| USP20     | 10868  | Leukemia, MESH:D015473 | Arsenic Ge   | 14.71 | 155 |
| ZNF750    | 79755  | Leukemia, MESH:D015473 | Arsenic ar   | 14.71 | 10  |
| APOA1     | 335    | Leukemia, MESH:D015473 | alpha-Toc    | 14.7  | 156 |
| EPB41L4A  | 114915 | Leukemia, MESH:D015473 | arsenite D   | 14.7  | 154 |
| KRT1      | 3848   | Leukemia, MESH:D015473 | Antimony     | 14.7  | 156 |
| NINJ1     | 4814   | Leukemia, MESH:D015473 | Arsenic Ca   | 14.7  | 155 |
| PCSK5     | 5125   | Leukemia, MESH:D015473 | Arsenic Tr   | 14.7  | 262 |
| PNPLA8    | 50640  | Leukemia, MESH:D015470 | Deferoxan    | 14.7  | 8   |
| RRAGD     | 58528  | Leukemia, MESH:D015473 | Arsenic Tr   | 14.7  | 159 |
| TYW5      | 129450 | Leukemia, MESH:D015473 | Arsenic De   | 14.7  | 155 |
| ACAD9     | 28976  | Leukemia, MESH:D015470 | Dexameth     | 14.69 | 15  |
| APLN      | 8862   | Leukemia, MESH:D015473 | Dexameth     | 14.69 | 8   |
| C1ORF19E  | 84886  | Leukemia, MESH:D015470 | Dasatinib l  | 14.69 | 11  |
| CALB2     | 794    | Leukemia, MESH:D015473 | Arsenic Ar   | 14.69 | 167 |
| CAPRN1    | 4076   | Leukemia, MESH:D015473 | arsenite R   | 14.69 | 160 |
| GALNT3    | 2591   | Leukemia, MESH:D015470 | Arsenic Tr   | 14.69 | 13  |
| MLEC      | 9761   | Leukemia, MESH:D015470 | Dexameth     | 14.69 | 7   |
| NCALD     | 83988  | Leukemia, MESH:D015470 | Cytarabine   | 14.69 | 76  |
| NDUFAB1   | 4706   | Leukemia, MESH:D015470 | Arsenic Tr   | 14.69 | 19  |
| NECTIN3   | 25945  | Leukemia, MESH:D015470 | Arsenic Tr   | 14.69 | 20  |
| PCCA      | 5095   | Leukemia, MESH:D015470 | Arsenic Tr   | 14.69 | 18  |
| PLEKHB1   | 58473  | Leukemia, MESH:D015470 | Decitabine   | 14.69 | 15  |
| SERPINF2  | 5345   | Leukemia, MESH:D015470 | Arsenic Tr   | 14.69 | 14  |
| SLBP      | 7884   | Leukemia, MESH:D004915 | Doxorubic    | 14.69 | 2   |
| SLC4A2    | 6522   | Leukemia, MESH:D015470 | Arsenic Tr   | 14.69 | 19  |
| SUCLG1    | 8802   | Leukemia, MESH:D015470 | Bezafibrat   | 14.69 | 14  |
| TNFRSF8   | 943    | Leukemia, MESH:D015470 | Arsenic Tr   | 14.69 | 13  |
| F11R      | 50848  | Leukemia, MESH:D015473 | arsenite D   | 14.68 | 154 |
| GALNT10   | 55568  | Leukemia, MESH:D004915 | Cytarabine   | 14.68 | 3   |
| GLUD2     | 2747   | Leukemia, MESH:D015473 | Calcitriol C | 14.68 | 155 |
| IMPA2     | 3613   | Leukemia, MESH:D015473 | Arsenic Ar   | 14.68 | 264 |
| ITIH1     | 3697   | Leukemia, MESH:D015470 | Arsenic Tr   | 14.68 | 14  |
| LINC0158I | 283551 | Leukemia, MESH:D015470 | (+)-JQ1 c    | 14.68 | 9   |
| MAP6      | 4135   | Leukemia, MESH:D015470 | Doxorubic    | 14.68 | 13  |
| NR0B1     | 190    | Leukemia, MESH:D015473 | arsenite D   | 14.68 | 154 |
| SLC25A5   | 292    | Leukemia, MESH:D015473 | Arsenic Tr   | 14.68 | 156 |
| APOM      | 55937  | Leukemia, MESH:D015473 | Arsenic De   | 14.67 | 158 |
| ASPRV1    | 151516 | Leukemia, MESH:D015473 | Arsenic De   | 14.67 | 9   |
| DEFA3     | 1668   | Leukemia, MESH:D015470 | Arsenic Tr   | 14.67 | 11  |
| MAPKBP1   | 23005  | Leukemia, MESH:D015473 | arsenite D   | 14.67 | 6   |

|           |        |                        |              |       |     |
|-----------|--------|------------------------|--------------|-------|-----|
| NEU1      | 4758   | Leukemia, MESH:D015473 | Arsenic ar:  | 14.67 | 157 |
| RAD23B    | 5887   | Leukemia, MESH:D015473 | Arsenic Tr   | 14.67 | 261 |
| SHISA3    | 152573 | Leukemia, MESH:D015473 | Arsenic M    | 14.67 | 154 |
| SLC9A1    | 6548   | Leukemia, MESH:D007948 | 2-(2-amin    | 14.67 | 3   |
| APOBEC3,  | 200315 | Leukemia, MESH:D015470 | Air Polluta  | 14.66 | 5   |
| ARHGAP1   | 9824   | Leukemia, MESH:D015473 | arsenite C   | 14.66 | 7   |
| EBLN2     | 55096  | Leukemia, MESH:D015470 | Dexameth     | 14.66 | 8   |
| FADS2     | 9415   | Leukemia, MESH:D015473 | Arsenic De   | 14.66 | 154 |
| NLGN4X    | 57502  | Leukemia, MESH:D015470 | Doxorubic    | 14.66 | 11  |
| NUP62CL   | 54830  | Leukemia, MESH:D015473 | Arsenic Ca   | 14.66 | 153 |
| RHBDD3    | 25807  | Leukemia, MESH:D015473 | Arsenic so   | 14.66 | 158 |
| SCINLB    | 406363 | Leukemia, MESH:D015473 | Dexameth     | 14.66 | 152 |
| STAT1     | 6772   | Leukemia, MESH:D004915 | Doxorubic    | 14.66 | 3   |
| TOP3A     | 7156   | Leukemia, MESH:D015470 | Air Polluta  | 14.66 | 14  |
| ZNF691    | 51058  | Leukemia, MESH:D015470 | Doxorubic    | 14.66 | 13  |
| C8ORF88   | 1E+08  | Leukemia, MESH:D015470 | Gasoline T   | 14.65 | 6   |
| EVPL      | 2125   | Leukemia, MESH:D015473 | Arsenic Tr   | 14.65 | 156 |
| GIMAP6    | 474344 | Leukemia, MESH:D015470 | Air Polluta  | 14.65 | 18  |
| RADX      | 55086  | Leukemia, MESH:D015473 | Arsenic Ca   | 14.65 | 9   |
| RMND1     | 55005  | Leukemia, MESH:D015470 | Arsenic Tr   | 14.65 | 13  |
| RRP7A     | 27341  | Leukemia, MESH:D015470 | Decitabine   | 14.65 | 19  |
| SECTM1    | 6398   | Leukemia, MESH:D015473 | Arsenic Tr   | 14.65 | 154 |
| TMSB10    | 9168   | Leukemia, MESH:D015473 | arsenite Bi  | 14.65 | 157 |
| TTF1      | 7270   | Leukemia, MESH:D015470 | Pentachlo    | 14.65 | 7   |
| ZNF587B   | 1E+08  | Leukemia, MESH:D015470 | Dronabinc    | 14.65 | 7   |
| BST2      | 684    | Leukemia, MESH:D007948 | Arsenic Tr   | 14.64 | 4   |
| CLCC1     | 23155  | Leukemia, MESH:D015470 | Arsenic Tr   | 14.64 | 19  |
| DNAH2     | 146754 | Leukemia, MESH:D015470 | Cytarabine   | 14.64 | 74  |
| EFCAB7    | 84455  | Leukemia, MESH:D015470 | Calcitriol E | 14.64 | 11  |
| KATNAL1   | 84056  | Leukemia, MESH:D015470 | Bortezomi    | 14.64 | 10  |
| MIR126    | 406913 | Leukemia, MESH:D015473 | Arsenic Ar   | 14.64 | 159 |
| MKX       | 283078 | Leukemia, MESH:D015470 | Irinotecan   | 14.64 | 6   |
| NVL       | 4931   | Leukemia, MESH:D015473 | Arsenic M    | 14.64 | 11  |
| PIP4P1    | 90809  | Leukemia, MESH:D015470 | Arsenic Tr   | 14.64 | 18  |
| POGLUT3   | 143888 | Leukemia, MESH:D015470 | Dexameth     | 14.64 | 8   |
| SOX12     | 6666   | Leukemia, MESH:D015470 | Doxorubic    | 14.64 | 12  |
| SPATA2L   | 124044 | Leukemia, MESH:D015470 | Dronabinc    | 14.64 | 7   |
| TAL1      | 6886   | Leukemia, MESH:D015473 | Arsenic Ar   | 14.64 | 263 |
| VPS4A     | 27183  | Leukemia, MESH:D015470 | Doxorubic    | 14.64 | 11  |
| VXN       | 254778 | Leukemia, MESH:D015470 | Dronabinc    | 14.64 | 8   |
| WDSUB1    | 151525 | Leukemia, MESH:D015470 | Calcitriol E | 14.64 | 14  |
| ADAM33    | 80332  | Leukemia, MESH:D015470 | Calcitriol E | 14.63 | 13  |
| AGAP3     | 116988 | Leukemia, MESH:D015470 | Calcitriol E | 14.63 | 7   |
| ANKRD29   | 147463 | Leukemia, MESH:D015470 | Arsenic Tr   | 14.63 | 13  |
| ATP5G1    | 11951  | Leukemia, MESH:D015473 | Arsenic Tr   | 14.63 | 259 |
| COX7B2    | 170712 | Leukemia, MESH:D015470 | Calcitriol E | 14.63 | 10  |
| FBXL16    | 146330 | Leukemia, MESH:D015470 | Calcitriol ( | 14.63 | 6   |
| FEZF2     | 55079  | Leukemia, MESH:D015473 | Arsenic ar:  | 14.63 | 155 |
| GPC1      | 2817   | Leukemia, MESH:D015473 | Arsenic Tr   | 14.63 | 156 |
| GUSBP4    | 375513 | Leukemia, MESH:D015470 | Dexameth     | 14.63 | 5   |
| IMMP1L    | 196294 | Leukemia, MESH:D015470 | Dronabinc    | 14.63 | 9   |
| IMP4      | 92856  | Leukemia, MESH:D015470 | Indometha    | 14.63 | 7   |
| LAYN      | 143903 | Leukemia, MESH:D015470 | Calcitriol E | 14.63 | 7   |
| LINC0067: | 1E+08  | Leukemia, MESH:D015470 | Methotrex    | 14.63 | 7   |
| MBD5      | 55777  | Leukemia, MESH:D015470 | Decitabine   | 14.63 | 17  |
| MYO1E     | 4643   | Leukemia, MESH:D015470 | Doxorubic    | 14.63 | 14  |
| NKX2-2    | 4821   | Leukemia, MESH:D015473 | arsenite D   | 14.63 | 155 |
| OSGEP     | 55644  | Leukemia, MESH:D015470 | Dexameth     | 14.63 | 6   |



|          |        |                        |              |       |     |
|----------|--------|------------------------|--------------|-------|-----|
| PLK2     | 10769  | Leukemia, MESH:D015473 | Dexameth     | 14.63 | 153 |
| PRKY     | 5616   | Leukemia, MESH:D015470 | Dexameth     | 14.63 | 9   |
| PWP1     | 11137  | Leukemia, MESH:D015470 | Dexameth     | 14.63 | 9   |
| SLC9A6   | 10479  | Leukemia, MESH:D015470 | Doxorubic    | 14.63 | 13  |
| SSH1     | 54434  | Leukemia, MESH:D015470 | Calcitriol E | 14.63 | 12  |
| ST6GALN/ | 55808  | Leukemia, MESH:D015470 | Calcitriol E | 14.63 | 8   |
| ST8SIA3  | 51046  | Leukemia, MESH:D015470 | Dronabinc    | 14.63 | 7   |
| SULT1A1  | 6817   | Leukemia, MESH:D015473 | Arsenic Tr   | 14.63 | 261 |
| TSSC4    | 10078  | Leukemia, MESH:D015470 | Benzene E    | 14.63 | 25  |
| ULK4     | 54986  | Leukemia, MESH:D015470 | Doxorubic    | 14.63 | 12  |
| USP21    | 27005  | Leukemia, MESH:D015470 | Doxorubic    | 14.63 | 12  |
| AQP10    | 89872  | Leukemia, MESH:D015470 | Arsenic Tr   | 14.62 | 11  |
| AZU1     | 566    | Leukemia, MESH:D015470 | Arsenic Tr   | 14.62 | 11  |
| CACNA2D  | 93589  | Leukemia, MESH:D015470 | Dexameth     | 14.62 | 6   |
| CCNE1    | 898    | Leukemia, MESH:D004915 | Daunorub     | 14.62 | 3   |
| DAAM1    | 23002  | Leukemia, MESH:D015470 | (+)-JQ1 c    | 14.62 | 12  |
| DCAF5    | 8816   | Leukemia, MESH:D015470 | Doxorubic    | 14.62 | 13  |
| DIPK2A   | 205428 | Leukemia, MESH:D015470 | Doxorubic    | 14.62 | 13  |
| FBRSL1   | 57666  | Leukemia, MESH:D015473 | Arsenic ar   | 14.62 | 156 |
| FUT6     | 2528   | Leukemia, MESH:D015470 | Arsenic Tr   | 14.62 | 12  |
| GAB1     | 2549   | Leukemia, MESH:D015470 | Calcitriol E | 14.62 | 16  |
| GOLM2    | 113201 | Leukemia, MESH:D015470 | Doxorubic    | 14.62 | 12  |
| HDGFL3   | 50810  | Leukemia, MESH:D015470 | Methotrex    | 14.62 | 9   |
| KCTD17   | 79734  | Leukemia, MESH:D015470 | Dexameth     | 14.62 | 11  |
| KIAA2026 | 158358 | Leukemia, MESH:D015470 | Dexameth     | 14.62 | 10  |
| KNOP1    | 400506 | Leukemia, MESH:D015470 | Dexameth     | 14.62 | 6   |
| LRRC34   | 151827 | Leukemia, MESH:D015470 | (+)-JQ1 c    | 14.62 | 7   |
| PCDHGA2  | 56113  | Leukemia, MESH:D015470 | Dexameth     | 14.62 | 10  |
| PRPS1    | 5631   | Leukemia, MESH:D015470 | Arsenic Tr   | 14.62 | 18  |
| SHTN1    | 57698  | Leukemia, MESH:D015470 | Arsenic Tr   | 14.62 | 18  |
| SKAP2    | 8935   | Leukemia, MESH:D015470 | Doxorubic    | 14.62 | 14  |
| SLC9B2   | 133308 | Leukemia, MESH:D015470 | Doxorubic    | 14.62 | 12  |
| SVEP1    | 79987  | Leukemia, MESH:D004915 | Cytarabine   | 14.62 | 2   |
| TCF3     | 6929   | Leukemia, MESH:D015470 | Decitabine   | 14.62 | 19  |
| TOR4A    | 54863  | Leukemia, MESH:D015470 | Dexameth     | 14.62 | 6   |
| VAT1     | 10493  | Leukemia, MESH:D015473 | Arsenic De   | 14.62 | 156 |
| ZC3H7A   | 29066  | Leukemia, MESH:D015470 | Doxorubic    | 14.62 | 11  |
| ZNF704   | 619279 | Leukemia, MESH:D015470 | Doxorubic    | 14.62 | 11  |
| ADAMTS3  | 9508   | Leukemia, MESH:D015470 | Doxorubic    | 14.61 | 12  |
| ANKRD45  | 339416 | Leukemia, MESH:D015470 | Indometha    | 14.61 | 6   |
| CYGB     | 114757 | Leukemia, MESH:D007948 | Arsenic Tr   | 14.61 | 3   |
| EPM2A    | 7957   | Leukemia, MESH:D015473 | Dexameth     | 14.61 | 153 |
| EPS8L2   | 64787  | Leukemia, MESH:D015470 | Doxorubic    | 14.61 | 13  |
| FOS      | 2353   | Leukemia, MESH:D004915 | Doxorubic    | 14.61 | 4   |
| GLG1     | 2734   | Leukemia, MESH:D004915 | Doxorubic    | 14.61 | 2   |
| PLCB4    | 5332   | Leukemia, MESH:D015473 | Arsenic Tr   | 14.61 | 160 |
| RASGRP2  | 10235  | Leukemia, MESH:D004915 | Doxorubic    | 14.61 | 2   |
| TGFB1    | 7040   | Leukemia, MESH:D004915 | Daunorub     | 14.61 | 4   |
| TRAPPC14 | 55262  | Leukemia, MESH:D015470 | Doxorubic    | 14.61 | 10  |
| TRPV4    | 59341  | Leukemia, MESH:D015473 | Buthionine   | 14.61 | 154 |
| ZNF219   | 51222  | Leukemia, MESH:D015473 | arsenite D   | 14.61 | 154 |
| CELF2    | 10659  | Leukemia, MESH:D015473 | arsenite D   | 14.6  | 156 |
| CHMP5    | 51510  | Leukemia, MESH:D015473 | arsenic dis  | 14.6  | 154 |
| FGL2     | 10875  | Leukemia, MESH:D015473 | Arsenic Ar   | 14.6  | 261 |
| KLHDC4   | 54758  | Leukemia, MESH:D015473 | Arsenic De   | 14.6  | 155 |
| ATP5F1C  | 509    | Leukemia, MESH:D015473 | Arsenic Tr   | 14.59 | 156 |
| CLDN5    | 7122   | Leukemia, MESH:D007948 | 2-(2-amin    | 14.59 | 2   |
| ECM1     | 1893   | Leukemia, MESH:D015473 | Arsenic Tr   | 14.59 | 262 |

|          |        |                            |              |       |     |
|----------|--------|----------------------------|--------------|-------|-----|
| IQGAP2   | 10788  | Leukemia, MESH:D015473     | Genistein    | 14.59 | 155 |
| NPY1R    | 4886   | Leukemia, MESH:D015473     | arsenite D   | 14.59 | 155 |
| TALDO1   | 6888   | Leukemia, MESH:D007948     | Arsenic Tr   | 14.59 | 3   |
| PRKAR1A  | 5573   | Leukemia, MESH:D01marker/m | Arsenic Tr   | 14.58 | 261 |
| ARL6IP5  | 10550  | Leukemia, MESH:D004915     | Cytarabine   | 14.58 | 2   |
| ASL      | 435    | Leukemia, MESH:D015473     | Arsenic Tr   | 14.58 | 260 |
| CES1     | 1066   | Leukemia, MESH:D015470     | Benzene C    | 14.58 | 31  |
| CSK      | 1445   | Leukemia, MESH:D015473     | caffeic aci  | 14.58 | 151 |
| GPT      | 2875   | Leukemia, MESH:D007948     | 2-(2-amin    | 14.58 | 3   |
| HEPH     | 9843   | Leukemia, MESH:D015470     | Dasatinib    | 14.58 | 24  |
| NME2     | 4831   | Leukemia, MESH:D015473     | arsenite C   | 14.58 | 155 |
| PHACTR3  | 116154 | Leukemia, MESH:D015473     | Dexameth     | 14.58 | 5   |
| PRPH     | 5630   | Leukemia, MESH:D004915     | Cytarabine   | 14.58 | 2   |
| CASR     | 846    | Leukemia, MESH:D015470     | Calcitriol C | 14.57 | 9   |
| GTF2IRD1 | 9569   | Leukemia, MESH:D004915     | Doxorubic    | 14.57 | 2   |
| PRELP    | 5549   | Leukemia, MESH:D004915     | Doxorubic    | 14.57 | 2   |
| SMPD4    | 55627  | Leukemia, MESH:D015473     | Arsenic ca   | 14.57 | 154 |
| TWIST1   | 7291   | Leukemia, MESH:D007948     | pyrazolan    | 14.57 | 2   |
| ZAP70    | 7535   | Leukemia, MESH:D015470     | Cyclophos    | 14.57 | 7   |
| DECR2    | 26063  | Leukemia, MESH:D015470     | Dexameth     | 14.56 | 8   |
| FNDC5    | 252995 | Leukemia, MESH:D015470     | Air Polluta  | 14.56 | 19  |
| MYL4     | 4635   | Leukemia, MESH:D015470     | Arsenic Tr   | 14.56 | 85  |
| NEBL     | 10529  | Leukemia, MESH:D015470     | Doxorubic    | 14.56 | 14  |
| PCP4L1   | 654790 | Leukemia, MESH:D015470     | Dronabinc    | 14.56 | 7   |
| PRPS2    | 5634   | Leukemia, MESH:D015470     | Arsenic Tr   | 14.56 | 17  |
| ST3GAL1  | 6482   | Leukemia, MESH:D015473     | Arsenic Cy   | 14.56 | 158 |
| TNFSF4   | 7292   | Leukemia, MESH:D015470     | Dexameth     | 14.56 | 12  |
| APRT     | 353    | Leukemia, MESH:D015470     | Dexameth     | 14.55 | 13  |
| BCORL1   | 63035  | Leukemia, MESH:D015470     | Dronabinc    | 14.55 | 10  |
| C1QBP    | 708    | Leukemia, MESH:D015473     | Dexameth     | 14.55 | 152 |
| CHRNA4   | 1137   | Leukemia, MESH:D015473     | antimony     | 14.55 | 157 |
| COG8     | 84342  | Leukemia, MESH:D015470     | Decitabine   | 14.55 | 19  |
| CYP1A2   | 1544   | Leukemia, MESH:D004915     | Daunorub     | 14.55 | 3   |
| ESCO2    | 157570 | Leukemia, MESH:D015473     | arsenite C   | 14.55 | 155 |
| ETV6     | 2120   | Leukemia, MESH:D004915     | Doxorubic    | 14.55 | 2   |
| LTA      | 4049   | Leukemia, MESH:D015473     | Arsenic Ar   | 14.55 | 161 |
| NKAIN1   | 79570  | Leukemia, MESH:D015470     | Cyclophos    | 14.55 | 12  |
| PPARG    | 5468   | Leukemia, MESH:D004915     | Cytarabine   | 14.55 | 3   |
| PSMD14   | 10213  | Leukemia, MESH:D015470     | Dexameth     | 14.55 | 10  |
| SOAT1    | 6646   | Leukemia, MESH:D015473     | Arsenic ca   | 14.55 | 155 |
| STARD13  | 90627  | Leukemia, MESH:D015470     | Dexameth     | 14.55 | 12  |
| TENM3    | 55714  | Leukemia, MESH:D015470     | Calcitriol C | 14.55 | 13  |
| TNNC2    | 7125   | Leukemia, MESH:D015470     | Dexameth     | 14.55 | 7   |
| UAP1L1   | 91373  | Leukemia, MESH:D015470     | Arsenic Tr   | 14.55 | 14  |
| YY1      | 7528   | Leukemia, MESH:D015470     | Arsenic Tr   | 14.55 | 14  |
| ABCC3    | 8714   | Leukemia, MESH:D004915     | Doxorubic    | 14.54 | 3   |
| ADCYAP1  | 116    | Leukemia, MESH:D015473     | Arsenic ar   | 14.54 | 11  |
| BRF2     | 55290  | Leukemia, MESH:D015470     | Bortezomi    | 14.54 | 14  |
| CASQ1    | 844    | Leukemia, MESH:D015470     | Doxorubic    | 14.54 | 11  |
| CNOT3    | 4849   | Leukemia, MESH:D015470     | Methotrex    | 14.54 | 11  |
| DHRS4    | 10901  | Leukemia, MESH:D015473     | Arsenic Ge   | 14.54 | 157 |
| EIF4EBP2 | 1979   | Leukemia, MESH:D004915     | Doxorubic    | 14.54 | 2   |
| FER1L4   | 80307  | Leukemia, MESH:D015473     | arsenite D   | 14.54 | 153 |
| GPRIN1   | 114787 | Leukemia, MESH:D015473     | Arsenic Ge   | 14.54 | 10  |
| LMX1A    | 4009   | Leukemia, MESH:D015473     | Arsenic Tr   | 14.54 | 155 |
| LRP5     | 4041   | Leukemia, MESH:D015473     | Arsenic Ca   | 14.54 | 158 |
| LTBP4    | 8425   | Leukemia, MESH:D004915     | Doxorubic    | 14.54 | 2   |
| MEAF6    | 64769  | Leukemia, MESH:D015473     | arsenite D   | 14.54 | 155 |

|         |        |                            |              |       |     |
|---------|--------|----------------------------|--------------|-------|-----|
| MIR20A  | 406982 | Leukemia, MESH:D015470     | Calcitriol[E | 14.54 | 7   |
| MT1L    | 4500   | Leukemia, MESH:D015470     | Arsenic Tr   | 14.54 | 18  |
| TEF     | 7008   | Leukemia, MESH:D015473     | arsenite[D   | 14.54 | 154 |
| TRAF6   | 7189   | Leukemia, MESH:D007948     | Arsenic Tr   | 14.54 | 3   |
| ZFP459  | 328274 | Leukemia, MESH:D015470     | Cyclophos    | 14.54 | 7   |
| LYL1    | 4066   | Leukemia, MESH:D01marker/m | Cytarabine   | 14.53 | 76  |
| ACSM3   | 6296   | Leukemia, MESH:D015473     | Dexameth     | 14.53 | 155 |
| AICDA   | 57379  | Leukemia, MESH:D015473     | Arsenic[Ar   | 14.53 | 263 |
| ARL6IP4 | 51329  | Leukemia, MESH:D015470     | Dexameth     | 14.53 | 8   |
| COPS3   | 8533   | Leukemia, MESH:D015470     | Doxorubic    | 14.53 | 13  |
| CTR9    | 9646   | Leukemia, MESH:D015470     | Air Polluta  | 14.53 | 8   |
| DZIP1   | 22873  | Leukemia, MESH:D015470     | Cyclophos    | 14.53 | 11  |
| ENHO    | 375704 | Leukemia, MESH:D015470     | Dronabinc    | 14.53 | 7   |
| FAM149B | 317662 | Leukemia, MESH:D015473     | Arsenic[De   | 14.53 | 11  |
| FOXJ3   | 22887  | Leukemia, MESH:D015470     | Doxorubic    | 14.53 | 15  |
| GALNT5  | 11227  | Leukemia, MESH:D015473     | Arsenic[De   | 14.53 | 9   |
| GIMAP8  | 155038 | Leukemia, MESH:D015470     | Air Polluta  | 14.53 | 11  |
| HCST    | 10870  | Leukemia, MESH:D015470     | Arsenic Tr   | 14.53 | 12  |
| HOXD3   | 3232   | Leukemia, MESH:D015470     | Decitabine   | 14.53 | 14  |
| HSPB3   | 8988   | Leukemia, MESH:D015470     | Calcitriol[E | 14.53 | 12  |
| IFITM2  | 10581  | Leukemia, MESH:D015473     | Arsenic[De   | 14.53 | 155 |
| LIN28A  | 79727  | Leukemia, MESH:D015470     | Decitabine   | 14.53 | 14  |
| LOXL3   | 84695  | Leukemia, MESH:D015470     | Dexameth     | 14.53 | 7   |
| NUCB2   | 4925   | Leukemia, MESH:D007948     | 2-(2-amin    | 14.53 | 3   |
| POLDIP2 | 26073  | Leukemia, MESH:D015473     | Arsenic Tr   | 14.53 | 261 |
| SLC10A4 | 201780 | Leukemia, MESH:D015470     | (+)-JQ1 c    | 14.53 | 7   |
| SLITRK6 | 84189  | Leukemia, MESH:D015470     | Air Polluta  | 14.53 | 7   |
| USP45   | 85015  | Leukemia, MESH:D015470     | Bortezomi    | 14.53 | 13  |
| WBP11   | 51729  | Leukemia, MESH:D015470     | Dexameth     | 14.53 | 8   |
| WDR35   | 57539  | Leukemia, MESH:D015470     | (+)-JQ1 c    | 14.53 | 7   |
| ZFP42   | 132625 | Leukemia, MESH:D015473     | Arsenic Tr   | 14.53 | 262 |
| ZNF277  | 11179  | Leukemia, MESH:D015470     | Indometha    | 14.53 | 7   |
| ADPRM   | 56985  | Leukemia, MESH:D015473     | Arsenic[ar   | 14.52 | 10  |
| CAPN7   | 23473  | Leukemia, MESH:D015470     | Calcitriol[E | 14.52 | 11  |
| CCDC88B | 283234 | Leukemia, MESH:D015470     | (+)-JQ1 c    | 14.52 | 9   |
| CD248   | 57124  | Leukemia, MESH:D015470     | Doxorubic    | 14.52 | 13  |
| DIPK1A  | 388650 | Leukemia, MESH:D015470     | Doxorubic    | 14.52 | 12  |
| FAHD2A  | 51011  | Leukemia, MESH:D015470     | Arsenic Tr   | 14.52 | 12  |
| FSHB    | 2488   | Leukemia, MESH:D015473     | 2-(2-chlor   | 14.52 | 156 |
| HLA-DQA | 3117   | Leukemia, MESH:D015473     | Arsenic[Ca   | 14.52 | 8   |
| LAMTOR5 | 10542  | Leukemia, MESH:D015470     | Arsenic Tr   | 14.52 | 13  |
| LYPD6B  | 130576 | Leukemia, MESH:D015473     | Arsenic[Ge   | 14.52 | 155 |
| MRPL15  | 29088  | Leukemia, MESH:D015470     | (+)-JQ1 c    | 14.52 | 9   |
| MRPS2   | 51116  | Leukemia, MESH:D015470     | Pentachlo    | 14.52 | 9   |
| NMRK2   | 27231  | Leukemia, MESH:D015470     | Dexameth     | 14.52 | 11  |
| NOSIP   | 51070  | Leukemia, MESH:D015470     | Doxorubic    | 14.52 | 11  |
| PSMF1   | 9491   | Leukemia, MESH:D015473     | Calcitriol[E | 14.52 | 153 |
| RAD54L2 | 23132  | Leukemia, MESH:D015470     | Dexameth     | 14.52 | 8   |
| RBM18   | 92400  | Leukemia, MESH:D015470     | Doxorubic    | 14.52 | 14  |
| RHOT1   | 55288  | Leukemia, MESH:D015470     | Arsenic Tr   | 14.52 | 19  |
| SERGEF  | 26297  | Leukemia, MESH:D015470     | Arsenic Tr   | 14.52 | 12  |
| SMUG1   | 23583  | Leukemia, MESH:D015470     | Decitabine   | 14.52 | 19  |
| TBL2    | 26608  | Leukemia, MESH:D015470     | Dronabinc    | 14.52 | 7   |
| UBL7    | 84993  | Leukemia, MESH:D015470     | Dexameth     | 14.52 | 7   |
| UPK1B   | 7348   | Leukemia, MESH:D015470     | Cyclophos    | 14.52 | 11  |
| UPRT    | 139596 | Leukemia, MESH:D015470     | Calcitriol[E | 14.52 | 12  |
| ABRACL  | 58527  | Leukemia, MESH:D015473     | arsenite[D   | 14.51 | 154 |
| FKRP    | 79147  | Leukemia, MESH:D015470     | Doxorubic    | 14.51 | 12  |

|          |        |                        |             |       |     |
|----------|--------|------------------------|-------------|-------|-----|
| GABARAP  | 23766  | Leukemia, MESH:D015473 | Arsenic Cy  | 14.51 | 155 |
| HLA-B    | 3106   | Leukemia, MESH:D015473 | Arsenic Tr  | 14.51 | 261 |
| HOMEZ    | 57594  | Leukemia, MESH:D015470 | Dexameth    | 14.51 | 6   |
| KIF20B   | 9585   | Leukemia, MESH:D015473 | arsenite C  | 14.51 | 154 |
| MAB21L1  | 4081   | Leukemia, MESH:D015473 | arsenite D  | 14.51 | 154 |
| MX2      | 4600   | Leukemia, MESH:D015473 | Dexameth    | 14.51 | 156 |
| PDE6B    | 5158   | Leukemia, MESH:D015473 | Arsenic De  | 14.51 | 155 |
| POLQ     | 10721  | Leukemia, MESH:D004915 | Doxorubic   | 14.51 | 2   |
| PPIC     | 5480   | Leukemia, MESH:D004915 | Cytarabine  | 14.51 | 3   |
| TLNRD1   | 59274  | Leukemia, MESH:D015470 | Dexameth    | 14.51 | 11  |
| TNNI1    | 7135   | Leukemia, MESH:D015470 | Dexameth    | 14.51 | 11  |
| TULP3    | 7289   | Leukemia, MESH:D015470 | Dexameth    | 14.51 | 7   |
| AKT1S1   | 84335  | Leukemia, MESH:D015470 | Chloroqui   | 14.5  | 9   |
| CLEC7A   | 64581  | Leukemia, MESH:D015470 | Air Polluta | 14.5  | 16  |
| COL6A3   | 1293   | Leukemia, MESH:D007948 | Arsenic Tr  | 14.5  | 4   |
| DNASE1L3 | 1776   | Leukemia, MESH:D015470 | Dexameth    | 14.5  | 11  |
| E2F3     | 1871   | Leukemia, MESH:D015473 | Arsenic Ar  | 14.5  | 160 |
| EIF3C    | 8663   | Leukemia, MESH:D015470 | Arsenic Tr  | 14.5  | 20  |
| FERMT2   | 10979  | Leukemia, MESH:D015473 | Arsenic Tr  | 14.5  | 261 |
| HIGD1A   | 25994  | Leukemia, MESH:D015473 | Arsenic Ar  | 14.5  | 159 |
| IKZF1    | 10320  | Leukemia, MESH:D015470 | Bortezomi   | 14.5  | 9   |
| MIR501   | 574503 | Leukemia, MESH:D015470 | Air Polluta | 14.5  | 20  |
| NCOA7    | 135112 | Leukemia, MESH:D015473 | Arsenic Tr  | 14.5  | 262 |
| RECK     | 8434   | Leukemia, MESH:D015473 | Dasatinib   | 14.5  | 155 |
| SERINC3  | 10955  | Leukemia, MESH:D004915 | Doxorubic   | 14.5  | 2   |
| ADCY9    | 115    | Leukemia, MESH:D015470 | Arsenic Tr  | 14.49 | 17  |
| ALOX5AP  | 241    | Leukemia, MESH:D007948 | Arsenic Tr  | 14.49 | 3   |
| CAVIN2   | 8436   | Leukemia, MESH:D015473 | Arsenic Tr  | 14.49 | 156 |
| CDH5     | 1003   | Leukemia, MESH:D015470 | Arsenic Tr  | 14.49 | 20  |
| EHD4     | 30844  | Leukemia, MESH:D015470 | Calcitriol  | 14.49 | 10  |
| NFYB     | 4801   | Leukemia, MESH:D015470 | Dexameth    | 14.49 | 8   |
| PFKFB1   | 5207   | Leukemia, MESH:D015470 | Benzene C   | 14.49 | 28  |
| PLXNA1   | 5361   | Leukemia, MESH:D015473 | arsenite D  | 14.49 | 156 |
| QPCT     | 25797  | Leukemia, MESH:D015470 | Decitabine  | 14.49 | 21  |
| RPL5     | 6125   | Leukemia, MESH:D015470 | Dronabinc   | 14.49 | 11  |
| ATP5MEA  | 559659 | Leukemia, MESH:D015470 | Dronabinc   | 14.48 | 3   |
| HLA-J    | 3137   | Leukemia, MESH:D015473 | sodium ar   | 14.48 | 155 |
| MUC16    | 94025  | Leukemia, MESH:D015473 | Genistein   | 14.48 | 152 |
| PRL2C3   | 18812  | Leukemia, MESH:D015473 | alpha-Toc   | 14.48 | 153 |
| GOT1     | 2805   | Leukemia, MESH:D015473 | Arsenic Tr  | 14.47 | 156 |
| GRIN1    | 2902   | Leukemia, MESH:D015470 | Arsenic Tr  | 14.47 | 31  |
| AGTR1A   | 11607  | Leukemia, MESH:D015470 | Daunorub    | 14.46 | 36  |
| B3GNT3   | 10331  | Leukemia, MESH:D015473 | Arsenic Tr  | 14.46 | 154 |
| CDC42SE2 | 56990  | Leukemia, MESH:D015470 | Benzoates   | 14.46 | 8   |
| DGUOK    | 1716   | Leukemia, MESH:D015473 | arsenite G  | 14.46 | 154 |
| GAS1     | 2619   | Leukemia, MESH:D015473 | Arsenic Ar  | 14.46 | 263 |
| HNRNPK   | 3190   | Leukemia, MESH:D007948 | Arsenic Tr  | 14.46 | 3   |
| HOXC6    | 3223   | Leukemia, MESH:D015470 | Cytarabine  | 14.46 | 77  |
| HS3ST3A1 | 9955   | Leukemia, MESH:D015473 | Calcitriol  | 14.46 | 152 |
| PFKMB    | 568001 | Leukemia, MESH:D015470 | Alitretinoi | 14.46 | 6   |
| PLEKHG6  | 55200  | Leukemia, MESH:D015473 | Arsenic Ar  | 14.46 | 159 |
| PRL      | 5617   | Leukemia, MESH:D015473 | Arsenic Cy  | 14.46 | 22  |
| RARG     | 5916   | Leukemia, MESH:D015473 | Anthracyc   | 14.46 | 264 |
| SLC16A2  | 6567   | Leukemia, MESH:D015473 | arsenite D  | 14.46 | 154 |
| SSX8P    | 280659 | Leukemia, MESH:D015470 | Arsenic Tr  | 14.46 | 18  |
| VPS25    | 84313  | Leukemia, MESH:D015473 | Dexameth    | 14.46 | 8   |
| WDFY2    | 115825 | Leukemia, MESH:D015473 | Arsenic Ar  | 14.46 | 159 |
| ABCB11A  | 797269 | Leukemia, MESH:D015470 | Dexameth    | 14.45 | 3   |

|          |        |                        |              |       |     |
|----------|--------|------------------------|--------------|-------|-----|
| ADIPOQ   | 9370   | Leukemia, MESH:D004915 | Cytarabine   | 14.45 | 3   |
| ALDH6A1  | 4329   | Leukemia, MESH:D015470 | Arsenic Tr   | 14.45 | 26  |
| APLNR    | 187    | Leukemia, MESH:D004915 | Cytarabine   | 14.45 | 2   |
| C1ORF109 | 54955  | Leukemia, MESH:D015470 | Bortezomi    | 14.45 | 6   |
| CAMK4    | 814    | Leukemia, MESH:D015473 | Arsenic Tr   | 14.45 | 156 |
| CLDN9    | 9080   | Leukemia, MESH:D015473 | Arsenic Tr   | 14.45 | 154 |
| CRISPLD1 | 83690  | Leukemia, MESH:D015473 | Calcitriol[C | 14.45 | 153 |
| DOK1     | 1796   | Leukemia, MESH:D015470 | Decitabine   | 14.45 | 19  |
| GALE     | 2582   | Leukemia, MESH:D015473 | Arsenic Tr   | 14.45 | 260 |
| HLA-DPB: | 3115   | Leukemia, MESH:D015470 | Benzene[B    | 14.45 | 23  |
| MRPL30   | 51263  | Leukemia, MESH:D015470 | Arsenic Tr   | 14.45 | 16  |
| NOXA1    | 10811  | Leukemia, MESH:D015470 | Dexameth     | 14.45 | 6   |
| PSMD10   | 5716   | Leukemia, MESH:D015473 | arsenite[G   | 14.45 | 7   |
| VCP      | 7415   | Leukemia, MESH:D015470 | Arsenic Tr   | 14.45 | 15  |
| VSIG4    | 11326  | Leukemia, MESH:D015473 | Arsenic Tr   | 14.45 | 261 |
| ANKRD12  | 23253  | Leukemia, MESH:D015473 | Arsenic Tr   | 14.44 | 262 |
| BIN1     | 274    | Leukemia, MESH:D004915 | Doxorubic    | 14.44 | 3   |
| ELAVL4   | 1996   | Leukemia, MESH:D015470 | Dronabinc    | 14.44 | 16  |
| EXOSC7   | 23016  | Leukemia, MESH:D015473 | Genistein[I  | 14.44 | 154 |
| GUSBP1   | 728411 | Leukemia, MESH:D015470 | Cytarabine   | 14.44 | 73  |
| IL4      | 3565   | Leukemia, MESH:D007948 | 2-(2-amin    | 14.44 | 3   |
| INO80C   | 125476 | Leukemia, MESH:D015470 | Dexameth     | 14.44 | 6   |
| MCTS1    | 28985  | Leukemia, MESH:D015470 | Arsenic Tr   | 14.44 | 33  |
| PEX11B   | 8799   | Leukemia, MESH:D015470 | Air Polluta  | 14.44 | 13  |
| POMT1    | 10585  | Leukemia, MESH:D015470 | Arsenic Tr   | 14.44 | 13  |
| SLC39A4  | 55630  | Leukemia, MESH:D015470 | Calcitriol[C | 14.44 | 8   |
| STAP1    | 26228  | Leukemia, MESH:D015473 | Arsenic Tr   | 14.44 | 260 |
| SWT1     | 54823  | Leukemia, MESH:D015470 | Decitabine   | 14.44 | 16  |
| TINAG    | 27283  | Leukemia, MESH:D015470 | Calcitriol[C | 14.44 | 9   |
| TM2D1    | 83941  | Leukemia, MESH:D015470 | Decitabine   | 14.44 | 16  |
| TOMM20/  | 406309 | Leukemia, MESH:D015470 | Dexameth     | 14.44 | 3   |
| VSX1     | 30813  | Leukemia, MESH:D015470 | Alitretinoin | 14.44 | 7   |
| ZNF543   | 125919 | Leukemia, MESH:D015470 | Dexameth     | 14.44 | 6   |
| AADAT    | 51166  | Leukemia, MESH:D015470 | Dexameth     | 14.43 | 12  |
| ALKBH6   | 84964  | Leukemia, MESH:D015470 | Doxorubic    | 14.43 | 10  |
| C8B      | 732    | Leukemia, MESH:D015470 | Dexameth     | 14.43 | 10  |
| CASK     | 8573   | Leukemia, MESH:D015470 | Arsenic Tr   | 14.43 | 14  |
| CDK5RAP: | 51654  | Leukemia, MESH:D015470 | Doxorubic    | 14.43 | 12  |
| CUTA     | 51596  | Leukemia, MESH:D015473 | Arsenic[Ge   | 14.43 | 155 |
| DAZAP1   | 26528  | Leukemia, MESH:D015470 | Air Polluta  | 14.43 | 18  |
| DEFA4    | 1669   | Leukemia, MESH:D015473 | Arsenic Tr   | 14.43 | 258 |
| EIF2AK2  | 5610   | Leukemia, MESH:D007948 | Arsenic Tr   | 14.43 | 3   |
| ELP6     | 54859  | Leukemia, MESH:D015470 | Arsenic Tr   | 14.43 | 13  |
| FABP7    | 2173   | Leukemia, MESH:D007948 | Arsenic Tr   | 14.43 | 4   |
| FBXO4    | 26272  | Leukemia, MESH:D015470 | Calcitriol[C | 14.43 | 5   |
| HAS2     | 3037   | Leukemia, MESH:D007948 | Arsenic Tr   | 14.43 | 3   |
| IGFBP2A  | 794176 | Leukemia, MESH:D015470 | Dexameth     | 14.43 | 5   |
| KTN1     | 3895   | Leukemia, MESH:D004915 | Doxorubic    | 14.43 | 2   |
| LCMT2    | 9836   | Leukemia, MESH:D015470 | Decitabine   | 14.43 | 18  |
| LTK      | 4058   | Leukemia, MESH:D015473 | Arsenic[ar   | 14.43 | 156 |
| MAP1S    | 55201  | Leukemia, MESH:D015470 | Benzene[T    | 14.43 | 21  |
| MIR15B   | 406949 | Leukemia, MESH:D015470 | Arsenic Tr   | 14.43 | 25  |
| MRPL40   | 64976  | Leukemia, MESH:D015470 | Dexameth     | 14.43 | 12  |
| MZF1     | 7593   | Leukemia, MESH:D015470 | Calcitriol[C | 14.43 | 6   |
| NPAS1    | 4861   | Leukemia, MESH:D015470 | Arsenic Tr   | 14.43 | 20  |
| PTPRT    | 11122  | Leukemia, MESH:D015473 | arsenite[G   | 14.43 | 154 |
| SEC22A   | 26984  | Leukemia, MESH:D015470 | Decitabine   | 14.43 | 12  |
| SPTLC1   | 10558  | Leukemia, MESH:D015470 | Arsenic Tr   | 14.43 | 13  |

|          |        |                        |              |       |     |
|----------|--------|------------------------|--------------|-------|-----|
| TCF15    | 6939   | Leukemia, MESH:D015470 | Dexameth     | 14.43 | 7   |
| TMEM79   | 84283  | Leukemia, MESH:D015470 | Calcitriol C | 14.43 | 6   |
| ZC3H12A  | 80149  | Leukemia, MESH:D015470 | Air Polluta  | 14.43 | 16  |
| ZNF415   | 55786  | Leukemia, MESH:D015470 | Decitabine   | 14.43 | 16  |
| ALDH8A1  | 64577  | Leukemia, MESH:D015470 | Arsenic Tr   | 14.42 | 13  |
| APOOL    | 139322 | Leukemia, MESH:D015470 | Bortezomi    | 14.42 | 12  |
| CASKIN2  | 57513  | Leukemia, MESH:D015470 | Arsenic Tr   | 14.42 | 17  |
| CBARP    | 255057 | Leukemia, MESH:D015470 | Dexameth     | 14.42 | 6   |
| COG1     | 9382   | Leukemia, MESH:D015470 | Doxorubic    | 14.42 | 11  |
| COMMD6   | 170622 | Leukemia, MESH:D015473 | arsenite D   | 14.42 | 154 |
| DCK      | 1633   | Leukemia, MESH:D015473 | arsenite C   | 14.42 | 159 |
| DDR2     | 4921   | Leukemia, MESH:D015473 | Arsenic Tr   | 14.42 | 264 |
| ELAPOR1  | 57535  | Leukemia, MESH:D015470 | Calcitriol F | 14.42 | 9   |
| ERVMER3  | 1E+08  | Leukemia, MESH:D015470 | Arsenic Tr   | 14.42 | 12  |
| FGFR2    | 2263   | Leukemia, MESH:D015473 | Arsenic Tr   | 14.42 | 261 |
| IPO11    | 51194  | Leukemia, MESH:D015470 | Calcitriol M | 14.42 | 8   |
| KATNBL1  | 79768  | Leukemia, MESH:D015470 | Dronabinc    | 14.42 | 6   |
| LYZ      | 4069   | Leukemia, MESH:D015473 | Calcitriol C | 14.42 | 158 |
| MINDY3   | 80013  | Leukemia, MESH:D015470 | Dexameth     | 14.42 | 7   |
| MIR106A  | 406899 | Leukemia, MESH:D015470 | Dexameth     | 14.42 | 9   |
| NOMO1    | 23420  | Leukemia, MESH:D015470 | Dexameth     | 14.42 | 5   |
| NSG2     | 51617  | Leukemia, MESH:D015470 | Doxorubic    | 14.42 | 12  |
| NUBP1    | 4682   | Leukemia, MESH:D015470 | Arsenic Tr   | 14.42 | 13  |
| PDE7A    | 5150   | Leukemia, MESH:D015470 | Bortezomi    | 14.42 | 14  |
| PDYN     | 5173   | Leukemia, MESH:D007948 | 2-(2-amin    | 14.42 | 2   |
| PGBD3    | 267004 | Leukemia, MESH:D015470 | Dexameth     | 14.42 | 5   |
| PHYHIPL  | 84457  | Leukemia, MESH:D015473 | Arsenic Ar   | 14.42 | 165 |
| PHYKPL   | 85007  | Leukemia, MESH:D015470 | Calcitriol E | 14.42 | 12  |
| PKD1L2   | 114780 | Leukemia, MESH:D015470 | Decitabine   | 14.42 | 13  |
| PRKD3    | 23683  | Leukemia, MESH:D015470 | Arsenic Tr   | 14.42 | 19  |
| PYCARD   | 29108  | Leukemia, MESH:D015473 | Arsenic Tr   | 14.42 | 261 |
| SUSD1    | 64420  | Leukemia, MESH:D015470 | Dexameth     | 14.42 | 12  |
| TBKBP1   | 9755   | Leukemia, MESH:D015470 | (+)-JQ1 c    | 14.42 | 9   |
| VPS8     | 23355  | Leukemia, MESH:D015470 | Dexameth     | 14.42 | 6   |
| YTHDF3   | 253943 | Leukemia, MESH:D015470 | Indometha    | 14.42 | 10  |
| ZW10     | 9183   | Leukemia, MESH:D015473 | Arsenic Tr   | 14.42 | 260 |
| ABHD17B  | 51104  | Leukemia, MESH:D015470 | Dexameth     | 14.41 | 11  |
| ANKRD18  | 253650 | Leukemia, MESH:D015470 | Resveratrc   | 14.41 | 7   |
| APOO     | 79135  | Leukemia, MESH:D015470 | Dexameth     | 14.41 | 7   |
| ATP6AP1L | 92270  | Leukemia, MESH:D015470 | Dexameth     | 14.41 | 6   |
| BACE2    | 25825  | Leukemia, MESH:D004915 | Doxorubic    | 14.41 | 2   |
| C2ORF76  | 130355 | Leukemia, MESH:D015470 | Dexameth     | 14.41 | 10  |
| C3ORF62  | 375341 | Leukemia, MESH:D015470 | Decitabine   | 14.41 | 17  |
| CFI      | 3426   | Leukemia, MESH:D015473 | Arsenic Tr   | 14.41 | 261 |
| CNTN3    | 5067   | Leukemia, MESH:D015470 | Arsenic Tr   | 14.41 | 13  |
| CTNND1   | 1500   | Leukemia, MESH:D015473 | Arsenic Tr   | 14.41 | 261 |
| DPM1     | 8813   | Leukemia, MESH:D015470 | Doxorubic    | 14.41 | 12  |
| ENDOG    | 2021   | Leukemia, MESH:D015473 | Arsenic De   | 14.41 | 12  |
| GPR161   | 23432  | Leukemia, MESH:D015470 | Doxorubic    | 14.41 | 11  |
| ISLR2    | 57611  | Leukemia, MESH:D015470 | Doxorubic    | 14.41 | 12  |
| KLHDC7A  | 127707 | Leukemia, MESH:D015470 | Dronabinc    | 14.41 | 7   |
| LSM14A   | 26065  | Leukemia, MESH:D015470 | Dexameth     | 14.41 | 12  |
| MIGA1    | 374986 | Leukemia, MESH:D015470 | Dexameth     | 14.41 | 6   |
| MPDU1    | 9526   | Leukemia, MESH:D015470 | Arsenic Tr   | 14.41 | 17  |
| MRAP2    | 112609 | Leukemia, MESH:D015470 | Arsenic Tr   | 14.41 | 12  |
| MRPS14   | 63931  | Leukemia, MESH:D015470 | Dexameth     | 14.41 | 6   |
| ORC2     | 4999   | Leukemia, MESH:D015470 | Dexameth     | 14.41 | 12  |
| PALLD    | 23022  | Leukemia, MESH:D015473 | Calcitriol E | 14.41 | 153 |

|          |        |                        |              |       |     |
|----------|--------|------------------------|--------------|-------|-----|
| PCDHGA9  | 56107  | Leukemia, MESH:D015470 | Doxorubic    | 14.41 | 12  |
| POPDC3   | 64208  | Leukemia, MESH:D015470 | Doxorubic    | 14.41 | 12  |
| PWWP2B   | 170394 | Leukemia, MESH:D015470 | Doxorubic    | 14.41 | 12  |
| RBAK     | 57786  | Leukemia, MESH:D015470 | Doxorubic    | 14.41 | 13  |
| RRP1     | 8568   | Leukemia, MESH:D015470 | Resveratrc   | 14.41 | 9   |
| SLC25A37 | 51312  | Leukemia, MESH:D015473 | Arsenic Tr   | 14.41 | 262 |
| SNRNP35  | 11066  | Leukemia, MESH:D015470 | Doxorubic    | 14.41 | 11  |
| STK32A   | 202374 | Leukemia, MESH:D015470 | Dexameth     | 14.41 | 7   |
| SZRD1    | 26099  | Leukemia, MESH:D015470 | Dexameth     | 14.41 | 7   |
| TCAIM    | 285343 | Leukemia, MESH:D015470 | Doxorubic    | 14.41 | 12  |
| TRAPPC1  | 58485  | Leukemia, MESH:D015470 | Dexameth     | 14.41 | 11  |
| USP8     | 9101   | Leukemia, MESH:D015470 | Dexameth     | 14.41 | 11  |
| ZDHH8P   | 150244 | Leukemia, MESH:D015470 | (+)-JQ1 c    | 14.41 | 6   |
| APBB2    | 323    | Leukemia, MESH:D004915 | Doxorubic    | 14.4  | 2   |
| COL1A1B  | 325675 | Leukemia, MESH:D015470 | Dexameth     | 14.4  | 6   |
| EWSR1    | 2130   | Leukemia, MESH:D004915 | Doxorubic    | 14.4  | 2   |
| FAM104B  | 90736  | Leukemia, MESH:D015470 | Arsenic Tr   | 14.4  | 17  |
| MIRLET7B | 406884 | Leukemia, MESH:D015473 | arsenite M   | 14.4  | 153 |
| PEMT     | 10400  | Leukemia, MESH:D004915 | Doxorubic    | 14.4  | 2   |
| PPRC1    | 23082  | Leukemia, MESH:D015473 | Arsenic Tr   | 14.4  | 260 |
| SNHG9    | 735301 | Leukemia, MESH:D015470 | Doxorubic    | 14.4  | 10  |
| TAP2     | 6891   | Leukemia, MESH:D004915 | Daunorub     | 14.4  | 2   |
| UGT2B15  | 7366   | Leukemia, MESH:D015470 | Calcitriol C | 14.4  | 11  |
| YY1AP1   | 55249  | Leukemia, MESH:D015470 | Doxorubic    | 14.4  | 10  |
| ZFAND1   | 79752  | Leukemia, MESH:D015473 | arsenite M   | 14.4  | 155 |
| ADGRE3   | 84658  | Leukemia, MESH:D015473 | Calcitriol s | 14.39 | 152 |
| AIP-1    | 179898 | Leukemia, MESH:D015473 | Arsenic ar:  | 14.39 | 9   |
| ARMH3    | 79591  | Leukemia, MESH:D015470 | Doxorubic    | 14.39 | 10  |
| HTR2A    | 3356   | Leukemia, MESH:D015473 | Arsenic ar:  | 14.39 | 13  |
| MST1L    | 11223  | Leukemia, MESH:D015470 | Tobacco S    | 14.39 | 6   |
| TM4SF20  | 79853  | Leukemia, MESH:D015473 | Daunorub     | 14.39 | 15  |
| VSTM4    | 196740 | Leukemia, MESH:D015473 | Arsenic Ca   | 14.39 | 8   |
| ZNF665   | 79788  | Leukemia, MESH:D015473 | Arsenic ar:  | 14.39 | 9   |
| ANGPTL2  | 23452  | Leukemia, MESH:D004915 | Cytarabine   | 14.38 | 2   |
| DEAF1    | 10522  | Leukemia, MESH:D015473 | caffeic aci  | 14.38 | 152 |
| EIF4B    | 1975   | Leukemia, MESH:D015473 | Arsenic Tr   | 14.38 | 265 |
| EPHB2    | 2048   | Leukemia, MESH:D015470 | Bortezomi    | 14.38 | 9   |
| INSM1B   | 323882 | Leukemia, MESH:D015470 | Pentachlo    | 14.38 | 4   |
| NELL2    | 4753   | Leukemia, MESH:D004915 | Cytarabine   | 14.38 | 2   |
| PDCD7    | 10081  | Leukemia, MESH:D015473 | Dexameth     | 14.38 | 5   |
| PGAM1B   | 327165 | Leukemia, MESH:D015470 | Pentachlo    | 14.38 | 4   |
| RUNDC3A  | 393118 | Leukemia, MESH:D015470 | Pentachlo    | 14.38 | 4   |
| SIRT2    | 22933  | Leukemia, MESH:D015470 | Methotrex    | 14.38 | 11  |
| XRCC3    | 7517   | Leukemia, MESH:D004915 | Doxorubic    | 14.38 | 2   |
| ZNF253   | 56242  | Leukemia, MESH:D015470 | Doxorubic    | 14.38 | 11  |
| ZNF649   | 65251  | Leukemia, MESH:D015470 | Doxorubic    | 14.38 | 11  |
| ANKDD1A  | 348094 | Leukemia, MESH:D015473 | arsenite sc  | 14.37 | 154 |
| CCT8     | 10694  | Leukemia, MESH:D015470 | Arsenic Tr   | 14.37 | 26  |
| CD8A     | 925    | Leukemia, MESH:D015470 | Cyclophos    | 14.37 | 78  |
| CLDN2    | 9075   | Leukemia, MESH:D015473 | alpha-Toc    | 14.37 | 6   |
| EGLN2    | 112398 | Leukemia, MESH:D015470 | Benzene C    | 14.37 | 20  |
| FBL      | 2091   | Leukemia, MESH:D015470 | Doxorubic    | 14.37 | 21  |
| KCTD6    | 200845 | Leukemia, MESH:D015473 | Arsenic Ar   | 14.37 | 263 |
| LCT      | 3938   | Leukemia, MESH:D015470 | Decitabine   | 14.37 | 13  |
| LYZ2     | 17105  | Leukemia, MESH:D015470 | Benzene C    | 14.37 | 26  |
| PDLIM2   | 64236  | Leukemia, MESH:D015470 | Calcitriol C | 14.37 | 11  |
| PEA15    | 8682   | Leukemia, MESH:D004915 | Doxorubic    | 14.37 | 2   |
| PI16     | 221476 | Leukemia, MESH:D015470 | Dexameth     | 14.37 | 14  |

|         |        |                              |              |       |     |
|---------|--------|------------------------------|--------------|-------|-----|
| RBMS1   | 5937   | Leukemia, MESH:D004915       | Doxorubic    | 14.37 | 2   |
| SNHG7   | 84973  | Leukemia, MESH:D015473       | Dexameth     | 14.37 | 8   |
| ZNF157  | 7712   | Leukemia, MESH:D015473       | arsenite D   | 14.37 | 5   |
| SMO     | 6608   | Leukemia, MESH:D01marker/m   | Arsenic Tr   | 14.36 | 155 |
| ANKRD19 | 138649 | Leukemia, MESH:D015473       | arsenite sc  | 14.36 | 153 |
| ASPA    | 443    | Leukemia, MESH:D015470       | Dexameth     | 14.36 | 8   |
| BFAR    | 51283  | Leukemia, MESH:D015473       | Arsenic Ar   | 14.36 | 160 |
| CCT2    | 10576  | Leukemia, MESH:D015473       | Arsenic Tr   | 14.36 | 263 |
| CD200   | 4345   | Leukemia, MESH:D015470       | Doxorubic    | 14.36 | 16  |
| CHCHD10 | 400916 | Leukemia, MESH:D015470       | Dexameth     | 14.36 | 9   |
| GFPT1   | 2673   | Leukemia, MESH:D015470       | Doxorubic    | 14.36 | 13  |
| HCAR3   | 8843   | Leukemia, MESH:D015470       | Calcitriol I | 14.36 | 8   |
| HEATR6  | 63897  | Leukemia, MESH:D015473       | Arsenic Tr   | 14.36 | 155 |
| JKAMP   | 51528  | Leukemia, MESH:D015473       | Arsenic Tr   | 14.36 | 260 |
| KCNN2   | 3781   | Leukemia, MESH:D004915       | Cytarabine   | 14.36 | 2   |
| LRRC47  | 57470  | Leukemia, MESH:D015470       | Doxorubic    | 14.36 | 21  |
| LYRM1   | 57149  | Leukemia, MESH:D015473       | Arsenic ar   | 14.36 | 10  |
| MGST3B  | 567275 | Leukemia, MESH:D015473       | Arsenic De   | 14.36 | 8   |
| NEDD4   | 4734   | Leukemia, MESH:D015473       | Arsenic ar   | 14.36 | 159 |
| NUP133  | 55746  | Leukemia, MESH:D015470       | Air Polluta  | 14.36 | 13  |
| PDXK    | 8566   | Leukemia, MESH:D015473       | Arsenic Tr   | 14.36 | 260 |
| PNRC1   | 10957  | Leukemia, MESH:D015473       | Arsenic Tr   | 14.36 | 261 |
| PRKCB   | 393953 | Leukemia, MESH:D015473       | Genistein    | 14.36 | 152 |
| PRKD1   | 5587   | Leukemia, MESH:D015470       | Calcitriol C | 14.36 | 14  |
| PRSS8   | 5652   | Leukemia, MESH:D015473       | Arsenic Ge   | 14.36 | 157 |
| RASSF4  | 83937  | Leukemia, MESH:D015473       | Dexameth     | 14.36 | 156 |
| RETN    | 56729  | Leukemia, MESH:D007948       | Arsenic Tr   | 14.36 | 3   |
| SMCR8   | 140775 | Leukemia, MESH:D015473       | Arsenic De   | 14.36 | 153 |
| SORL1   | 6653   | Leukemia, MESH:D015470       | Benzene C    | 14.36 | 28  |
| TAF1D   | 79101  | Leukemia, MESH:D015470       | Arsenic Tr   | 14.36 | 16  |
| TMEM245 | 23731  | Leukemia, MESH:D015473       | Arsenic Tr   | 14.36 | 258 |
| TMEM69  | 51249  | Leukemia, MESH:D015470       | Air Polluta  | 14.36 | 12  |
| TSPYL1  | 7259   | Leukemia, MESH:D015473       | Dexameth     | 14.36 | 153 |
| UNC5D   | 137970 | Leukemia, MESH:D015473       | Arsenic Tr   | 14.36 | 260 |
| YEATS2  | 55689  | Leukemia, MESH:D015470       | Dronabinc    | 14.36 | 9   |
| MIR15A  | 406948 | Leukemia, MESH:D01therapeuti | Arsenic Tr   | 14.35 | 154 |
| ATP5L   | 27425  | Leukemia, MESH:D015473       | arsenite D   | 14.35 | 8   |
| CCDC82  | 79780  | Leukemia, MESH:D015470       | Bortezomi    | 14.35 | 11  |
| CTDSPLB | 767676 | Leukemia, MESH:D015470       | Indometha    | 14.35 | 4   |
| EI24    | 9538   | Leukemia, MESH:D004915       | Daunorub     | 14.35 | 2   |
| FOXG1A  | 30274  | Leukemia, MESH:D015470       | Indometha    | 14.35 | 4   |
| LHX4    | 89884  | Leukemia, MESH:D015470       | Calcitriol C | 14.35 | 6   |
| MRPS11  | 64963  | Leukemia, MESH:D015473       | arsenite D   | 14.35 | 8   |
| QSOX2   | 169714 | Leukemia, MESH:D015473       | Genistein I  | 14.35 | 152 |
| RALGAPB | 57148  | Leukemia, MESH:D015473       | arsenite D   | 14.35 | 6   |
| SPTSSB  | 165679 | Leukemia, MESH:D015473       | Arsenic Ca   | 14.35 | 155 |
| TMEM86B | 255043 | Leukemia, MESH:D015473       | Arsenic De   | 14.35 | 9   |
| ZNF165  | 7718   | Leukemia, MESH:D015473       | arsenite Ci  | 14.35 | 154 |
| ATR     | 545    | Leukemia, MESH:D007948       | Arsenic Tr   | 14.34 | 3   |
| CLDN8   | 9073   | Leukemia, MESH:D015470       | Azacitidine  | 14.34 | 9   |
| DCUN1D5 | 84259  | Leukemia, MESH:D015473       | arsenite Re  | 14.34 | 156 |
| DMRT1   | 1761   | Leukemia, MESH:D015470       | Dronabinc    | 14.34 | 17  |
| FAM161B | 145483 | Leukemia, MESH:D015473       | Arsenic Re   | 14.34 | 157 |
| FMNL1   | 752    | Leukemia, MESH:D015470       | Benzene C    | 14.34 | 22  |
| IL18RAP | 8807   | Leukemia, MESH:D015470       | Indometha    | 14.34 | 11  |
| METTL5  | 29081  | Leukemia, MESH:D015470       | Gasoline I   | 14.34 | 7   |
| NCOR2   | 9612   | Leukemia, MESH:D007948       | 2-(2-amin    | 14.34 | 2   |
| PLN     | 5350   | Leukemia, MESH:D015473       | Dasatinib I  | 14.34 | 153 |



|          |        |                            |              |       |     |
|----------|--------|----------------------------|--------------|-------|-----|
| RCBTB1   | 55213  | Leukemia, MESH:D015470     | Mitoxantr    | 14.34 | 18  |
| SEMA6B   | 10501  | Leukemia, MESH:D015470     | Alitretinoin | 14.34 | 7   |
| ST6GALN/ | 30815  | Leukemia, MESH:D015470     | Cytarabine   | 14.34 | 79  |
| TMA16    | 55319  | Leukemia, MESH:D015473     | arsenite[G   | 14.34 | 154 |
| TOMM22   | 56993  | Leukemia, MESH:D015473     | arsenite[R   | 14.34 | 156 |
| ASMTL    | 8623   | Leukemia, MESH:D01marker/m | Benzene[C    | 14.33 | 28  |
| ARHGEF37 | 389337 | Leukemia, MESH:D015470     | Calcitriol[T | 14.33 | 6   |
| CLNS1A   | 1207   | Leukemia, MESH:D015473     | arsenite[G   | 14.33 | 154 |
| CTC1     | 80169  | Leukemia, MESH:D015470     | Doxorubic    | 14.33 | 13  |
| CYHR1    | 50626  | Leukemia, MESH:D015470     | Air Polluta  | 14.33 | 7   |
| FXR1     | 8087   | Leukemia, MESH:D004915     | Doxorubic    | 14.33 | 2   |
| H2AW     | 92815  | Leukemia, MESH:D015470     | (+)-JQ1 c    | 14.33 | 7   |
| INSC     | 387755 | Leukemia, MESH:D015470     | Dexameth     | 14.33 | 7   |
| KPNA6    | 23633  | Leukemia, MESH:D015470     | Dexameth     | 14.33 | 7   |
| MED18    | 54797  | Leukemia, MESH:D015473     | Arsenic[De   | 14.33 | 155 |
| NMNAT3   | 349565 | Leukemia, MESH:D015470     | Decitabine   | 14.33 | 21  |
| PI4KB    | 5298   | Leukemia, MESH:D015470     | Bortezomi    | 14.33 | 14  |
| RUNDC3A  | 10900  | Leukemia, MESH:D015470     | Dexameth     | 14.33 | 8   |
| TDH      | 157739 | Leukemia, MESH:D015473     | Dexameth     | 14.33 | 153 |
| UBE3A    | 7337   | Leukemia, MESH:D004915     | Doxorubic    | 14.33 | 2   |
| ANKRD13  | 81573  | Leukemia, MESH:D015470     | Indometha    | 14.32 | 9   |
| ATP13A4  | 84239  | Leukemia, MESH:D015470     | Dexameth     | 14.32 | 14  |
| AVEN     | 57099  | Leukemia, MESH:D015470     | Doxorubic    | 14.32 | 12  |
| CNTLN    | 54875  | Leukemia, MESH:D015470     | Doxorubic    | 14.32 | 14  |
| CYP2C8   | 1558   | Leukemia, MESH:D015473     | Dexameth     | 14.32 | 156 |
| ESRRG    | 2104   | Leukemia, MESH:D015473     | Arsenic[Ar   | 14.32 | 263 |
| FSTA     | 1E+08  | Leukemia, MESH:D015470     | Dexameth     | 14.32 | 4   |
| GBA2     | 57704  | Leukemia, MESH:D015470     | Air Polluta  | 14.32 | 6   |
| HBBE1.1  | 81538  | Leukemia, MESH:D015470     | Dexameth     | 14.32 | 4   |
| IFNAR1   | 3454   | Leukemia, MESH:D015470     | Air Polluta  | 14.32 | 12  |
| IRF3     | 3661   | Leukemia, MESH:D015473     | Arsenic Tr   | 14.32 | 261 |
| JAML     | 120425 | Leukemia, MESH:D015470     | Air Polluta  | 14.32 | 7   |
| LHCGR    | 3973   | Leukemia, MESH:D007948     | 2-(2-amin    | 14.32 | 2   |
| MAL      | 4118   | Leukemia, MESH:D015473     | Arsenic[ar   | 14.32 | 156 |
| MANF     | 7873   | Leukemia, MESH:D015473     | Arsenic Tr   | 14.32 | 155 |
| MB       | 4151   | Leukemia, MESH:D015470     | Dexameth     | 14.32 | 14  |
| METTL18  | 92342  | Leukemia, MESH:D015470     | Dexameth     | 14.32 | 8   |
| PARVG    | 64098  | Leukemia, MESH:D015470     | Calcitriol[( | 14.32 | 7   |
| RAPGEF1  | 2889   | Leukemia, MESH:D015470     | Bortezomi    | 14.32 | 13  |
| SNX2     | 6643   | Leukemia, MESH:D015470     | Dexameth     | 14.32 | 7   |
| TMEM70   | 54968  | Leukemia, MESH:D015470     | Arsenic Tr   | 14.32 | 18  |
| TNIP2    | 79155  | Leukemia, MESH:D015470     | Dexameth     | 14.32 | 14  |
| UQCRC1   | 7384   | Leukemia, MESH:D015473     | Arsenic[ar   | 14.32 | 13  |
| USP39    | 10713  | Leukemia, MESH:D015470     | Dexameth     | 14.32 | 7   |
| ZFP62    | 643836 | Leukemia, MESH:D015470     | Dexameth     | 14.32 | 12  |
| AKIP1    | 56672  | Leukemia, MESH:D015470     | Doxorubic    | 14.31 | 11  |
| AMMECR1  | 83607  | Leukemia, MESH:D015470     | Doxorubic    | 14.31 | 13  |
| ARHGEF4C | 55701  | Leukemia, MESH:D015470     | Dronabinc    | 14.31 | 7   |
| ARL4A    | 10124  | Leukemia, MESH:D015470     | Air Polluta  | 14.31 | 9   |
| ATXN7    | 6314   | Leukemia, MESH:D015470     | Doxorubic    | 14.31 | 12  |
| BCAN     | 63827  | Leukemia, MESH:D015470     | Decitabine   | 14.31 | 14  |
| CAD      | 790    | Leukemia, MESH:D015473     | Arsenic Tr   | 14.31 | 261 |
| CHPF     | 79586  | Leukemia, MESH:D015470     | Calcitriol[C | 14.31 | 11  |
| DENND2B  | 6764   | Leukemia, MESH:D015470     | Arsenic Tr   | 14.31 | 18  |
| EAF2     | 55840  | Leukemia, MESH:D015470     | Calcitriol[C | 14.31 | 8   |
| HEATR5A  | 25938  | Leukemia, MESH:D015470     | Doxorubic    | 14.31 | 11  |
| HER8A    | 323656 | Leukemia, MESH:D015470     | Tretinoin[t  | 14.31 | 5   |
| ID4      | 3400   | Leukemia, MESH:D007948     | Arsenic Tr   | 14.31 | 3   |

|          |        |                        |              |       |     |
|----------|--------|------------------------|--------------|-------|-----|
| MACROH:  | 55506  | Leukemia, MESH:D015470 | Arsenic Tr   | 14.31 | 18  |
| MT1IP    | 644314 | Leukemia, MESH:D015470 | Cytarabine   | 14.31 | 80  |
| NKG7     | 4818   | Leukemia, MESH:D015470 | Dronabinc    | 14.31 | 7   |
| PAQR3    | 152559 | Leukemia, MESH:D015470 | Decitabine   | 14.31 | 19  |
| PHKG2    | 5261   | Leukemia, MESH:D015473 | Arsenic Tr   | 14.31 | 260 |
| PON1     | 5444   | Leukemia, MESH:D015473 | Arsenic Ch   | 14.31 | 13  |
| RFX2     | 5990   | Leukemia, MESH:D015470 | Indometha    | 14.31 | 8   |
| RHOC     | 389    | Leukemia, MESH:D007948 | Arsenic Tr   | 14.31 | 4   |
| RPH3AL   | 9501   | Leukemia, MESH:D015470 | Dexameth     | 14.31 | 8   |
| SCMH1    | 22955  | Leukemia, MESH:D015470 | Dexameth     | 14.31 | 7   |
| SIPA1L3  | 23094  | Leukemia, MESH:D015470 | Doxorubic    | 14.31 | 12  |
| SLC19A2  | 10560  | Leukemia, MESH:D015473 | arsenite D   | 14.31 | 7   |
| SLC38A7  | 55238  | Leukemia, MESH:D015470 | Dexameth     | 14.31 | 11  |
| SNX33    | 257364 | Leukemia, MESH:D015470 | Calcitriol C | 14.31 | 11  |
| TPP1     | 1200   | Leukemia, MESH:D015473 | Arsenic Ar   | 14.31 | 263 |
| VDAC2    | 7417   | Leukemia, MESH:D015473 | Arsenic Tr   | 14.31 | 262 |
| WWP2     | 11060  | Leukemia, MESH:D015470 | Dronabinc    | 14.31 | 9   |
| ANXA5    | 308    | Leukemia, MESH:D015473 | arsenite G   | 14.3  | 157 |
| CCT7     | 10574  | Leukemia, MESH:D015470 | Arsenic Tr   | 14.3  | 18  |
| CD52     | 1043   | Leukemia, MESH:D015470 | Arsenic Tr   | 14.3  | 20  |
| COX5B    | 1329   | Leukemia, MESH:D015470 | Decitabine   | 14.3  | 16  |
| CYP3A2   | 266682 | Leukemia, MESH:D015473 | alpha-Toc    | 14.3  | 7   |
| FBLIM1   | 54751  | Leukemia, MESH:D015470 | Calcitriol ( | 14.3  | 9   |
| FFAR2    | 2867   | Leukemia, MESH:D015473 | arsenite G   | 14.3  | 153 |
| GM2A     | 2760   | Leukemia, MESH:D015470 | Dexameth     | 14.3  | 9   |
| GSTA2    | 2939   | Leukemia, MESH:D015473 | Arsenic Tr   | 14.3  | 157 |
| GSTP1    | 2950   | Leukemia, MESH:D007948 | 2-(2-amin    | 14.3  | 3   |
| MAP2K3   | 5606   | Leukemia, MESH:D007948 | 2-(2-amin    | 14.3  | 3   |
| NDUFS1   | 4719   | Leukemia, MESH:D007948 | 2-(2-amin    | 14.3  | 3   |
| OSM      | 5008   | Leukemia, MESH:D015470 | Cyclophos    | 14.3  | 8   |
| PYCR1    | 5831   | Leukemia, MESH:D015470 | Dexameth     | 14.3  | 8   |
| RAB3GAP: | 22930  | Leukemia, MESH:D015473 | arsenite sc  | 14.3  | 157 |
| ROR2     | 4920   | Leukemia, MESH:D015470 | Doxorubic    | 14.3  | 12  |
| RPA3     | 6119   | Leukemia, MESH:D004915 | Doxorubic    | 14.3  | 2   |
| TCEA3    | 6920   | Leukemia, MESH:D015470 | Arsenic Tr   | 14.3  | 13  |
| TMEM51   | 55092  | Leukemia, MESH:D015470 | Doxorubic    | 14.3  | 12  |
| TRNP1    | 388610 | Leukemia, MESH:D015470 | Dexameth     | 14.3  | 7   |
| WDR1     | 9948   | Leukemia, MESH:D015470 | Dronabinc    | 14.3  | 10  |
| ZDHHC2   | 51201  | Leukemia, MESH:D015470 | Arsenic Tr   | 14.3  | 20  |
| AGTR1    | 185    | Leukemia, MESH:D007948 | Arsenic Tr   | 14.29 | 3   |
| ESD      | 2098   | Leukemia, MESH:D015473 | Arsenic Tr   | 14.29 | 261 |
| LSM14B   | 149986 | Leukemia, MESH:D015473 | arsenite G   | 14.29 | 152 |
| NTS      | 4922   | Leukemia, MESH:D007948 | Arsenic Tr   | 14.29 | 3   |
| PFKFB4   | 5210   | Leukemia, MESH:D015473 | Arsenic Ar   | 14.29 | 158 |
| PTOV1    | 53635  | Leukemia, MESH:D015473 | arsenite G   | 14.29 | 152 |
| RASIP1   | 54922  | Leukemia, MESH:D015473 | Arsenic De   | 14.29 | 10  |
| ATP23    | 91419  | Leukemia, MESH:D015473 | Calcitriol M | 14.28 | 152 |
| CAVIN3   | 112464 | Leukemia, MESH:D004915 | Cytarabine   | 14.28 | 3   |
| CBLB     | 868    | Leukemia, MESH:D015473 | arsenite Ci  | 14.28 | 7   |
| GRPR     | 2925   | Leukemia, MESH:D015470 | Androgen     | 14.28 | 74  |
| LRR32    | 2615   | Leukemia, MESH:D015473 | Cytarabine   | 14.28 | 155 |
| LRR3B    | 116135 | Leukemia, MESH:D015473 | Arsenic Ar   | 14.28 | 261 |
| MLIP     | 90523  | Leukemia, MESH:D015473 | Arsenic Tr   | 14.28 | 154 |
| OSGEPL1  | 64172  | Leukemia, MESH:D015473 | Arsenic Ar   | 14.28 | 263 |
| SH3KBP1  | 30011  | Leukemia, MESH:D015473 | Arsenic ar:  | 14.28 | 11  |
| ACOD1    | 730249 | Leukemia, MESH:D015470 | Cyclophos    | 14.27 | 8   |
| CCDC198  | 55195  | Leukemia, MESH:D015470 | Arsenic Tr   | 14.27 | 15  |
| CCDC71L  | 168455 | Leukemia, MESH:D015473 | arsenite D   | 14.27 | 6   |

|         |        |                        |              |       |     |
|---------|--------|------------------------|--------------|-------|-----|
| DYNC1H1 | 1778   | Leukemia, MESH:D015473 | Arsenic Ar   | 14.27 | 160 |
| FAP     | 2191   | Leukemia, MESH:D015473 | Arsenic Tr   | 14.27 | 154 |
| GABBR1  | 2550   | Leukemia, MESH:D015473 | Arsenic Ar   | 14.27 | 265 |
| HOXC9   | 3225   | Leukemia, MESH:D015473 | arsenite D   | 14.27 | 153 |
| NID1    | 4811   | Leukemia, MESH:D015473 | Arsenic De   | 14.27 | 155 |
| PSMA1   | 5682   | Leukemia, MESH:D015473 | Arsenic Tr   | 14.27 | 262 |
| TRIM74  | 378108 | Leukemia, MESH:D015470 | Doxorubic    | 14.27 | 9   |
| ZNF385B | 151126 | Leukemia, MESH:D015473 | Arsenic De   | 14.27 | 156 |
| ABL1    | 25     | Leukemia, MESH:D007948 | 2-(2-amin    | 14.26 | 3   |
| ACTC1   | 70     | Leukemia, MESH:D015473 | Cytarabine   | 14.26 | 155 |
| GABRR1  | 2569   | Leukemia, MESH:D015473 | Arsenic Tr   | 14.26 | 260 |
| GALC    | 2581   | Leukemia, MESH:D015473 | arsenite G   | 14.26 | 154 |
| GARIN1B | 84691  | Leukemia, MESH:D015470 | Decitabine   | 14.26 | 14  |
| GLT8D2  | 83468  | Leukemia, MESH:D015473 | Calcitriol E | 14.26 | 153 |
| LYPD3   | 27076  | Leukemia, MESH:D015473 | Arsenic Ca   | 14.26 | 155 |
| MATN2   | 4147   | Leukemia, MESH:D004915 | Cytarabine   | 14.26 | 2   |
| MIR98   | 407054 | Leukemia, MESH:D015473 | Arsenic Tr   | 14.26 | 154 |
| MRPL11  | 65003  | Leukemia, MESH:D015473 | arsenite R   | 14.26 | 156 |
| PITPNM2 | 57605  | Leukemia, MESH:D015473 | Arsenic M    | 14.26 | 154 |
| PLB1    | 151056 | Leukemia, MESH:D015473 | arsenite G   | 14.26 | 154 |
| RBP2    | 5948   | Leukemia, MESH:D015470 | Alitretinoin | 14.26 | 13  |
| RXRB    | 6257   | Leukemia, MESH:D015473 | Arsenic Ch   | 14.26 | 157 |
| SGCE    | 8910   | Leukemia, MESH:D015473 | Arsenic M    | 14.26 | 154 |
| TEX261  | 113419 | Leukemia, MESH:D015473 | Arsenic Tr   | 14.26 | 153 |
| TIGD2   | 166815 | Leukemia, MESH:D015473 | Arsenic Tr   | 14.26 | 155 |
| ZNF549  | 256051 | Leukemia, MESH:D015470 | Dexameth     | 14.26 | 9   |
| ZNF703  | 80139  | Leukemia, MESH:D015473 | Genistein I  | 14.26 | 154 |
| CAVIN1  | 284119 | Leukemia, MESH:D004915 | Cytarabine   | 14.25 | 3   |
| CCDC190 | 339512 | Leukemia, MESH:D015470 | Dronabinol   | 14.25 | 6   |
| CCDC25  | 55246  | Leukemia, MESH:D015473 | Arsenic Ge   | 14.25 | 155 |
| CES3    | 23491  | Leukemia, MESH:D015470 | Dexameth     | 14.25 | 11  |
| COL15A1 | 1306   | Leukemia, MESH:D004915 | Doxorubic    | 14.25 | 2   |
| GOLGA2P | 55592  | Leukemia, MESH:D015470 | Dexameth     | 14.25 | 7   |
| H4C3    | 8364   | Leukemia, MESH:D004915 | Cytarabine   | 14.25 | 2   |
| HOXD8   | 3234   | Leukemia, MESH:D015473 | Dexameth     | 14.25 | 153 |
| MAGI1   | 9223   | Leukemia, MESH:D004915 | Cytarabine   | 14.25 | 2   |
| MAP3K1  | 4214   | Leukemia, MESH:D007948 | pyrazolant   | 14.25 | 2   |
| MTCL1   | 23255  | Leukemia, MESH:D015473 | Dexameth     | 14.25 | 153 |
| PMEL    | 6490   | Leukemia, MESH:D015473 | Cytarabine   | 14.25 | 153 |
| PPARA   | 5465   | Leukemia, MESH:D007948 | Arsenic Tr   | 14.25 | 3   |
| PRKCZ   | 5590   | Leukemia, MESH:D007948 | 2-(2-amin    | 14.25 | 3   |
| SHH     | 6469   | Leukemia, MESH:D007948 | Arsenic Tr   | 14.25 | 3   |
| TNFA    | 405785 | Leukemia, MESH:D015470 | Arsenic Tr   | 14.25 | 15  |
| TPM1    | 7168   | Leukemia, MESH:D015473 | Dexameth     | 14.25 | 156 |
| WARS2   | 10352  | Leukemia, MESH:D015473 | Arsenic ar   | 14.25 | 156 |
| ZFHx4   | 79776  | Leukemia, MESH:D004915 | Cytarabine   | 14.25 | 2   |
| COL24A1 | 255631 | Leukemia, MESH:D015473 | Arsenic De   | 14.24 | 155 |
| DEFB1   | 1672   | Leukemia, MESH:D015470 | Calcitriol E | 14.24 | 8   |
| EHBP1   | 23301  | Leukemia, MESH:D004915 | Doxorubic    | 14.24 | 2   |
| FUBP3   | 8939   | Leukemia, MESH:D015473 | arsenite D   | 14.24 | 154 |
| GLIPR1  | 11010  | Leukemia, MESH:D015473 | Arsenic Ar   | 14.24 | 264 |
| INHA    | 3623   | Leukemia, MESH:D015470 | Dexameth     | 14.24 | 16  |
| MRPS6   | 64968  | Leukemia, MESH:D015470 | Calcitriol E | 14.24 | 9   |
| NACC1   | 112939 | Leukemia, MESH:D015470 | Chloroqui    | 14.24 | 10  |
| NDUFAF2 | 91942  | Leukemia, MESH:D015473 | arsenite D   | 14.24 | 154 |
| NFATC3  | 4775   | Leukemia, MESH:D004915 | Doxorubic    | 14.24 | 2   |
| PARD3   | 56288  | Leukemia, MESH:D004915 | Doxorubic    | 14.24 | 2   |
| POLE    | 5426   | Leukemia, MESH:D015470 | Doxorubic    | 14.24 | 14  |

|          |        |                        |              |       |     |
|----------|--------|------------------------|--------------|-------|-----|
| PSENEN   | 55851  | Leukemia, MESH:D015473 | arsenite D   | 14.24 | 154 |
| RBBP6    | 5930   | Leukemia, MESH:D015470 | Daunorub     | 14.24 | 38  |
| RNF130   | 55819  | Leukemia, MESH:D015473 | Arsenic De   | 14.24 | 155 |
| RSRC2    | 65117  | Leukemia, MESH:D015470 | Dexameth     | 14.24 | 8   |
| SCAMP2   | 10066  | Leukemia, MESH:D015470 | Doxorubic    | 14.24 | 14  |
| SKIL     | 6498   | Leukemia, MESH:D015470 | Decitabine   | 14.24 | 17  |
| SLC25A30 | 253512 | Leukemia, MESH:D015470 | Dexameth     | 14.24 | 8   |
| SMCO4    | 56935  | Leukemia, MESH:D015473 | Arsenic De   | 14.24 | 155 |
| TM2D2    | 83877  | Leukemia, MESH:D015470 | Benzene E    | 14.24 | 21  |
| XPO1     | 7514   | Leukemia, MESH:D015473 | Arsenic Tr   | 14.24 | 262 |
| ZAK      | 559247 | Leukemia, MESH:D015470 | Dexameth     | 14.24 | 5   |
| ARX      | 170302 | Leukemia, MESH:D015470 | Dronabinc    | 14.23 | 6   |
| CDIP1    | 29965  | Leukemia, MESH:D015470 | Arsenic Tr   | 14.23 | 18  |
| CREB5    | 9586   | Leukemia, MESH:D015473 | Arsenic Tr   | 14.23 | 262 |
| DAZAP2   | 9802   | Leukemia, MESH:D015470 | Arsenic Tr   | 14.23 | 13  |
| DDX54    | 79039  | Leukemia, MESH:D015470 | Doxorubic    | 14.23 | 12  |
| DSP      | 1832   | Leukemia, MESH:D015473 | Arsenic Tr   | 14.23 | 261 |
| DYM      | 54808  | Leukemia, MESH:D015470 | Doxorubic    | 14.23 | 12  |
| ETFA     | 2108   | Leukemia, MESH:D015473 | Arsenic Tr   | 14.23 | 156 |
| FMR1     | 2332   | Leukemia, MESH:D015473 | arsenite D   | 14.23 | 157 |
| GPR182   | 11318  | Leukemia, MESH:D015470 | Chloroqui    | 14.23 | 8   |
| LGALSL   | 29094  | Leukemia, MESH:D015470 | Arsenic Tr   | 14.23 | 18  |
| LURAP1L  | 286343 | Leukemia, MESH:D015470 | Dexameth     | 14.23 | 7   |
| NRROS    | 375387 | Leukemia, MESH:D015470 | Decitabine   | 14.23 | 14  |
| RAP1A    | 5906   | Leukemia, MESH:D015473 | Arsenic ar:  | 14.23 | 159 |
| SERPINB3 | 6317   | Leukemia, MESH:D015470 | Calcitriol C | 14.23 | 7   |
| TCN2     | 6948   | Leukemia, MESH:D015470 | Dexameth     | 14.23 | 15  |
| TRPM7    | 54822  | Leukemia, MESH:D015470 | Calcitriol E | 14.23 | 12  |
| ZNF148   | 7707   | Leukemia, MESH:D015473 | Dexameth     | 14.23 | 157 |
| ADGRA3   | 166647 | Leukemia, MESH:D015470 | Dexameth     | 14.22 | 11  |
| ADGRF1   | 266977 | Leukemia, MESH:D015470 | (+)-JQ1 c    | 14.22 | 7   |
| BLOC1S6  | 26258  | Leukemia, MESH:D015470 | Dronabinc    | 14.22 | 7   |
| CADM3    | 57863  | Leukemia, MESH:D015470 | Calcitriol E | 14.22 | 6   |
| CSPG5    | 10675  | Leukemia, MESH:D015470 | Arsenic Tr   | 14.22 | 12  |
| CTSH     | 1512   | Leukemia, MESH:D007948 | Arsenic Tr   | 14.22 | 4   |
| CWC22    | 57703  | Leukemia, MESH:D015470 | (+)-JQ1 c    | 14.22 | 7   |
| ELOVL4   | 6785   | Leukemia, MESH:D015470 | (+)-JQ1 c    | 14.22 | 8   |
| FTSJ1    | 24140  | Leukemia, MESH:D015470 | Doxorubic    | 14.22 | 12  |
| GET3     | 439    | Leukemia, MESH:D015470 | Arsenic Tr   | 14.22 | 17  |
| MEAK7    | 57707  | Leukemia, MESH:D015470 | Arsenic Tr   | 14.22 | 14  |
| NCBP2    | 22916  | Leukemia, MESH:D015470 | Dexameth     | 14.22 | 8   |
| NEDD8    | 4738   | Leukemia, MESH:D015470 | Arsenic Tr   | 14.22 | 13  |
| OLR1     | 4973   | Leukemia, MESH:D007948 | Arsenic Tr   | 14.22 | 4   |
| POLR1F   | 221830 | Leukemia, MESH:D015470 | Dexameth     | 14.22 | 11  |
| ROMO1    | 140823 | Leukemia, MESH:D015470 | Arsenic Tr   | 14.22 | 18  |
| SSH1     | 54434  | Leukemia, MESH:D015473 | Arsenic ar:  | 14.22 | 11  |
| TCEAL2   | 140597 | Leukemia, MESH:D015470 | Decitabine   | 14.22 | 12  |
| TMEM88   | 92162  | Leukemia, MESH:D015470 | Cytarabine   | 14.22 | 78  |
| UNC13A   | 23025  | Leukemia, MESH:D015470 | Dexameth     | 14.22 | 10  |
| ZNF658   | 26149  | Leukemia, MESH:D015470 | Dronabinc    | 14.22 | 7   |
| ADAM28   | 10863  | Leukemia, MESH:D015470 | Calcitriol T | 14.21 | 7   |
| AHDC1    | 27245  | Leukemia, MESH:D015470 | Dexameth     | 14.21 | 13  |
| CSPRS    | 114564 | Leukemia, MESH:D015470 | Dronabinc    | 14.21 | 7   |
| DCUN1D3  | 123879 | Leukemia, MESH:D015470 | Arsenic Tr   | 14.21 | 13  |
| DNAH2    | 146754 | Leukemia, MESH:D015473 | Cytarabine   | 14.21 | 14  |
| ELL      | 8178   | Leukemia, MESH:D015470 | Doxorubic    | 14.21 | 14  |
| FBXL3    | 26224  | Leukemia, MESH:D015470 | Dexameth     | 14.21 | 11  |
| GALNT14  | 79623  | Leukemia, MESH:D015470 | Doxorubic    | 14.21 | 12  |

|          |        |                                      |              |       |     |
|----------|--------|--------------------------------------|--------------|-------|-----|
| IRX2     | 153572 | Leukemia, MESH:D015470               | Dronabinc    | 14.21 | 7   |
| KCTD16   | 57528  | Leukemia, MESH:D015470               | Doxorubic    | 14.21 | 10  |
| KIF16B   | 55614  | Leukemia, MESH:D015470               | Doxorubic    | 14.21 | 11  |
| LDAH     | 60526  | Leukemia, MESH:D015470               | Dexameth     | 14.21 | 8   |
| MAFA     | 389692 | Leukemia, MESH:D015470               | Dexameth     | 14.21 | 6   |
| MPPE1    | 65258  | Leukemia, MESH:D015470               | Dexameth     | 14.21 | 11  |
| PNISR    | 25957  | Leukemia, MESH:D004915               | Doxorubic    | 14.21 | 2   |
| RBBP6    | 5930   | Leukemia, MESH:D004915               | Daunorub     | 14.21 | 3   |
| RDH12L   | 494176 | Leukemia, MESH:D015470               | Dexameth     | 14.21 | 5   |
| SYT9     | 143425 | Leukemia, MESH:D015470               | Doxorubic    | 14.21 | 12  |
| TMEM268  | 203197 | Leukemia, MESH:D015470               | Doxorubic    | 14.21 | 11  |
| TRMT10C  | 54931  | Leukemia, MESH:D015470               | Doxorubic    | 14.21 | 12  |
| TSPAN14  | 81619  | Leukemia, MESH:D015470               | Arsenic Tr   | 14.21 | 17  |
| XIRP1    | 165904 | Leukemia, MESH:D015470               | Doxorubic    | 14.21 | 13  |
| DSCAML1  | 57453  | Leukemia, MESH:D015470               | Dexameth     | 14.2  | 12  |
| H2AC14   | 8331   | Leukemia, MESH:D015470               | Dexameth     | 14.2  | 12  |
| KIAA0825 | 285600 | Leukemia, MESH:D015470               | Doxorubic    | 14.2  | 10  |
| KIAA1143 | 57456  | Leukemia, MESH:D015470               | Dexameth     | 14.2  | 6   |
| MIR503HC | 84848  | Leukemia, MESH:D015470               | Arsenic Tr   | 14.2  | 12  |
| MYOZ2    | 51778  | Leukemia, MESH:D015470               | Doxorubic    | 14.2  | 12  |
| SFRP1    | 6422   | Leukemia, MESH:D007948               | Arsenic Tr   | 14.2  | 4   |
| STXBP5   | 134957 | Leukemia, MESH:D015470               | Doxorubic    | 14.2  | 12  |
| TMEM40   | 55287  | Leukemia, MESH:D015473               | Calcitriol[C | 14.2  | 6   |
| ZNF506   | 440515 | Leukemia, MESH:D015470               | Doxorubic    | 14.2  | 10  |
| ITGAL    | 3683   | Leukemia, MESH:D01marker/marsenite M |              | 14.19 | 157 |
| ATP1B3   | 483    | Leukemia, MESH:D015470               | Benzene[C    | 14.19 | 24  |
| C4ORF48  | 401115 | Leukemia, MESH:D015470               | Dexameth     | 14.19 | 5   |
| CAR2     | 12349  | Leukemia, MESH:D015470               | Arsenic Tr   | 14.19 | 14  |
| FDPS     | 2224   | Leukemia, MESH:D015473               | Antimony     | 14.19 | 156 |
| GRIA2    | 2891   | Leukemia, MESH:D015470               | Arsenic Tr   | 14.19 | 81  |
| NBPF3    | 84224  | Leukemia, MESH:D015470               | Dexameth     | 14.19 | 5   |
| PLCG2    | 5336   | Leukemia, MESH:D015473               | Arsenic Tr   | 14.19 | 263 |
| RAD54L   | 8438   | Leukemia, MESH:D004915               | Doxorubic    | 14.19 | 2   |
| RIPK3    | 11035  | Leukemia, MESH:D015473               | Arsenic[Ge   | 14.19 | 157 |
| RPL22    | 6146   | Leukemia, MESH:D015470               | Air Polluta  | 14.19 | 21  |
| RPS6KA1  | 6195   | Leukemia, MESH:D015473               | arsenite[Ci  | 14.19 | 157 |
| SLC24A2  | 25769  | Leukemia, MESH:D015473               | Calcitriol[C | 14.19 | 5   |
| SLC37A4  | 2542   | Leukemia, MESH:D015473               | Arsenic Tr   | 14.19 | 260 |
| SORBS1   | 10580  | Leukemia, MESH:D015473               | Arsenic[De   | 14.19 | 13  |
| ZNF204P  | 7754   | Leukemia, MESH:D015470               | Tobacco S    | 14.19 | 6   |
| APOBEC3C | 27350  | Leukemia, MESH:D015473               | Etoposide    | 14.18 | 153 |
| CD38     | 952    | Leukemia, MESH:D007948               | 2-(2-amin    | 14.18 | 3   |
| ESM1     | 11082  | Leukemia, MESH:D015470               | Dexameth     | 14.18 | 17  |
| MCTP2    | 55784  | Leukemia, MESH:D015473               | Arsenic Tr   | 14.18 | 260 |
| METAP2   | 10988  | Leukemia, MESH:D004915               | Doxorubic    | 14.18 | 2   |
| NKAIN4   | 128414 | Leukemia, MESH:D015473               | Dexameth     | 14.18 | 5   |
| PRDM2    | 7799   | Leukemia, MESH:D004915               | Doxorubic    | 14.18 | 2   |
| RFTN1    | 23180  | Leukemia, MESH:D004915               | Doxorubic    | 14.18 | 2   |
| RMND1    | 55005  | Leukemia, MESH:D015473               | Arsenic Tr   | 14.18 | 260 |
| SERPINI1 | 5274   | Leukemia, MESH:D015470               | Calcitriol[C | 14.18 | 13  |
| SF1      | 7536   | Leukemia, MESH:D004915               | Doxorubic    | 14.18 | 2   |
| SLC12A2  | 6558   | Leukemia, MESH:D015470               | Dexameth     | 14.18 | 14  |
| TAPBPL   | 55080  | Leukemia, MESH:D015473               | Arsenic[ar:  | 14.18 | 155 |
| ANKMY2   | 57037  | Leukemia, MESH:D015473               | Calcitriol[C | 14.17 | 153 |
| APOL1    | 8542   | Leukemia, MESH:D015473               | Calcitriol[C | 14.17 | 153 |
| ARSI     | 340075 | Leukemia, MESH:D015473               | Calcitriol[C | 14.17 | 153 |
| BCLAF1   | 9774   | Leukemia, MESH:D015473               | arsenite[D   | 14.17 | 157 |
| CNDP2    | 55748  | Leukemia, MESH:D015470               | Dexameth     | 14.17 | 8   |

|         |        |                            |              |       |     |
|---------|--------|----------------------------|--------------|-------|-----|
| DAP     | 1611   | Leukemia, MESH:D015470     | Dexameth     | 14.17 | 13  |
| GPCPD1  | 56261  | Leukemia, MESH:D015470     | Dexameth     | 14.17 | 13  |
| ICAM3   | 3385   | Leukemia, MESH:D015473     | Arsenic Tr   | 14.17 | 263 |
| L3HYPDH | 112849 | Leukemia, MESH:D015473     | Calcitriol E | 14.17 | 153 |
| OSGEP   | 55644  | Leukemia, MESH:D015473     | Arsenic ars  | 14.17 | 10  |
| PSMC3   | 5702   | Leukemia, MESH:D015470     | Arsenic Tr   | 14.17 | 19  |
| SEC24D  | 9871   | Leukemia, MESH:D015470     | Doxorubic    | 14.17 | 15  |
| TENT5A  | 55603  | Leukemia, MESH:D004915     | Cytarabine   | 14.17 | 2   |
| TOP1    | 7150   | Leukemia, MESH:D007948     | Arsenic Tr   | 14.17 | 3   |
| ABCG2   | 9429   | Leukemia, MESH:D004915     | Daunorub     | 14.16 | 2   |
| CNN1    | 1264   | Leukemia, MESH:D015473     | Dasatinib E  | 14.16 | 153 |
| DAAM2   | 23500  | Leukemia, MESH:D015473     | Arsenic De   | 14.16 | 155 |
| LASP1   | 3927   | Leukemia, MESH:D015473     | Arsenic Tr   | 14.16 | 264 |
| MIR142  | 406934 | Leukemia, MESH:D015473     | Arsenic M    | 14.16 | 11  |
| MYL6B   | 140465 | Leukemia, MESH:D015473     | arsenite D   | 14.16 | 154 |
| OGA     | 10724  | Leukemia, MESH:D015473     | Dexameth     | 14.16 | 157 |
| PIP5K1A | 8394   | Leukemia, MESH:D015470     | Azacitidine  | 14.16 | 13  |
| PWP1    | 11137  | Leukemia, MESH:D015473     | Dexameth     | 14.16 | 155 |
| SSH2    | 85464  | Leukemia, MESH:D015473     | Dexameth     | 14.16 | 155 |
| DSEL    | 92126  | Leukemia, MESH:D015470     | Calcitriol r | 14.15 | 7   |
| NOX1    | 27035  | Leukemia, MESH:D015470     | Arsenic Tr   | 14.15 | 20  |
| NRXN1   | 9378   | Leukemia, MESH:D015473     | Arsenic Ge   | 14.15 | 155 |
| PGRMC1  | 10857  | Leukemia, MESH:D015473     | arsenite D   | 14.15 | 8   |
| PRDM1   | 639    | Leukemia, MESH:D015473     | Arsenic ars  | 14.15 | 156 |
| RAB1B   | 81876  | Leukemia, MESH:D015470     | Azacitidine  | 14.15 | 13  |
| ROBO3   | 64221  | Leukemia, MESH:D015470     | Cytarabine   | 14.15 | 77  |
| SLC34A1 | 6569   | Leukemia, MESH:D015470     | Cyclophos    | 14.15 | 6   |
| HXA9    | 3205   | Leukemia, MESH:D01marker/m | Arsenic Tr   | 14.14 | 20  |
| BGN     | 633    | Leukemia, MESH:D015473     | caffeic aci  | 14.14 | 152 |
| C5      | 727    | Leukemia, MESH:D007948     | 2-(2-amin    | 14.14 | 3   |
| GON4L   | 54856  | Leukemia, MESH:D015470     | Doxorubic    | 14.14 | 14  |
| IPO8    | 10526  | Leukemia, MESH:D015470     | Air Polluta  | 14.14 | 6   |
| MT2     | 17750  | Leukemia, MESH:D015470     | Deferoxan    | 14.14 | 14  |
| NDUFB7  | 4713   | Leukemia, MESH:D015470     | Doxorubic    | 14.14 | 12  |
| PIK3C2A | 5286   | Leukemia, MESH:D015470     | Decitabine   | 14.14 | 17  |
| RGN     | 9104   | Leukemia, MESH:D015470     | Dexameth     | 14.14 | 11  |
| SF3B2   | 10992  | Leukemia, MESH:D015470     | Doxorubic    | 14.14 | 12  |
| SLC30A6 | 55676  | Leukemia, MESH:D015473     | Arsenic ars  | 14.14 | 11  |
| SMARCA2 | 6595   | Leukemia, MESH:D015473     | Arsenic Tr   | 14.14 | 260 |
| TFF3    | 7033   | Leukemia, MESH:D004915     | Cytarabine   | 14.14 | 2   |
| TULP3   | 7289   | Leukemia, MESH:D015473     | Dexameth     | 14.14 | 155 |
| ACTL6A  | 86     | Leukemia, MESH:D015470     | Air Polluta  | 14.13 | 12  |
| ACTR6   | 64431  | Leukemia, MESH:D015470     | Dexameth     | 14.13 | 7   |
| BAZ2A   | 11176  | Leukemia, MESH:D015470     | Calcitriol E | 14.13 | 8   |
| CD24A   | 12484  | Leukemia, MESH:D015470     | Dexameth     | 14.13 | 12  |
| COL22A1 | 169044 | Leukemia, MESH:D015470     | Calcitriol E | 14.13 | 19  |
| FCGR1A  | 2209   | Leukemia, MESH:D015470     | Air Polluta  | 14.13 | 12  |
| GYS2    | 2998   | Leukemia, MESH:D015470     | Decitabine   | 14.13 | 16  |
| ISL2    | 64843  | Leukemia, MESH:D015470     | Arsenic Tr   | 14.13 | 12  |
| LUM     | 4060   | Leukemia, MESH:D007948     | Cytarabine   | 14.13 | 3   |
| MIR122  | 406906 | Leukemia, MESH:D015470     | Arsenic Tr   | 14.13 | 40  |
| MIR132  | 406921 | Leukemia, MESH:D015470     | Arsenic Tr   | 14.13 | 21  |
| MRPL51  | 51258  | Leukemia, MESH:D015470     | Air Polluta  | 14.13 | 11  |
| MSL1    | 339287 | Leukemia, MESH:D015470     | Doxorubic    | 14.13 | 12  |
| MYH6    | 4624   | Leukemia, MESH:D007948     | Arsenic Tr   | 14.13 | 3   |
| NEIL2   | 252969 | Leukemia, MESH:D015473     | Arsenic Ge   | 14.13 | 9   |
| NXT1    | 29107  | Leukemia, MESH:D015470     | Dronabinc    | 14.13 | 9   |
| ORC3    | 23595  | Leukemia, MESH:D015470     | Doxorubic    | 14.13 | 12  |

|          |        |                        |              |       |     |
|----------|--------|------------------------|--------------|-------|-----|
| PIKFYVE  | 200576 | Leukemia, MESH:D015473 | arsenite sc  | 14.13 | 157 |
| PTPN9    | 5780   | Leukemia, MESH:D015470 | Decitabine   | 14.13 | 18  |
| PTTG2    | 10744  | Leukemia, MESH:D015473 | Arsenic Ca   | 14.13 | 8   |
| RPS6KA2  | 6196   | Leukemia, MESH:D015470 | Cyclophos    | 14.13 | 14  |
| SARM1    | 23098  | Leukemia, MESH:D015470 | Arsenic Tr   | 14.13 | 15  |
| SCAF8    | 22828  | Leukemia, MESH:D015470 | Air Polluta  | 14.13 | 7   |
| TBC1D4   | 9882   | Leukemia, MESH:D004915 | Cytarabine   | 14.13 | 3   |
| URB1     | 9875   | Leukemia, MESH:D015470 | Dexameth     | 14.13 | 13  |
| ZFAND2B  | 130617 | Leukemia, MESH:D015470 | Benzene C    | 14.13 | 28  |
| ALKBH8   | 91801  | Leukemia, MESH:D015470 | (+)-JQ1 c    | 14.12 | 8   |
| ALOX12B  | 242    | Leukemia, MESH:D015470 | Decitabine   | 14.12 | 18  |
| ARHGEF18 | 23370  | Leukemia, MESH:D015470 | Calcitriol C | 14.12 | 12  |
| CANT1    | 124583 | Leukemia, MESH:D015470 | Dexameth     | 14.12 | 6   |
| CAST     | 831    | Leukemia, MESH:D015473 | Arsenic ar:  | 14.12 | 156 |
| CSNK1A1  | 1452   | Leukemia, MESH:D015470 | Doxorubic    | 14.12 | 15  |
| EFCAB2   | 84288  | Leukemia, MESH:D015470 | Doxorubic    | 14.12 | 12  |
| EFR3B    | 22979  | Leukemia, MESH:D015470 | Decitabine   | 14.12 | 12  |
| GNG10    | 2790   | Leukemia, MESH:D015470 | Doxorubic    | 14.12 | 11  |
| HELQ     | 113510 | Leukemia, MESH:D015470 | Dexameth     | 14.12 | 11  |
| HM13     | 81502  | Leukemia, MESH:D015470 | Arsenic Tr   | 14.12 | 13  |
| IQGAP3   | 128239 | Leukemia, MESH:D015470 | Calcitriol C | 14.12 | 13  |
| KBTBD2   | 25948  | Leukemia, MESH:D015470 | Air Polluta  | 14.12 | 11  |
| KCNG3    | 170850 | Leukemia, MESH:D015470 | (+)-JQ1 c    | 14.12 | 7   |
| LONP1    | 9361   | Leukemia, MESH:D015470 | Dexameth     | 14.12 | 10  |
| MIR760   | 1E+08  | Leukemia, MESH:D015470 | Doxorubic    | 14.12 | 10  |
| MLH3     | 27030  | Leukemia, MESH:D015470 | Decitabine   | 14.12 | 16  |
| MSRA     | 4482   | Leukemia, MESH:D015470 | Arsenic Tr   | 14.12 | 23  |
| MVP      | 9961   | Leukemia, MESH:D007948 | Arsenic Tr   | 14.12 | 3   |
| PALS1    | 64398  | Leukemia, MESH:D015470 | Arsenic Tr   | 14.12 | 13  |
| PEX26    | 55670  | Leukemia, MESH:D015470 | Doxorubic    | 14.12 | 11  |
| RAI14    | 26064  | Leukemia, MESH:D004915 | Doxorubic    | 14.12 | 2   |
| SAMD5    | 389432 | Leukemia, MESH:D015470 | Decitabine   | 14.12 | 16  |
| SMNDC1   | 10285  | Leukemia, MESH:D015470 | Doxorubic    | 14.12 | 13  |
| SNAP91   | 9892   | Leukemia, MESH:D015473 | arsenite C   | 14.12 | 156 |
| SNX18    | 112574 | Leukemia, MESH:D015473 | Calcitriol M | 14.12 | 7   |
| SORBS2   | 8470   | Leukemia, MESH:D004915 | Cytarabine   | 14.12 | 2   |
| USF2     | 7392   | Leukemia, MESH:D015470 | Arsenic Tr   | 14.12 | 13  |
| VPS52    | 6293   | Leukemia, MESH:D015470 | Dexameth     | 14.12 | 7   |
| ANKRD2   | 26287  | Leukemia, MESH:D015470 | Arsenic Tr   | 14.11 | 17  |
| BMP1     | 649    | Leukemia, MESH:D015470 | Decitabine   | 14.11 | 22  |
| BSG      | 682    | Leukemia, MESH:D015473 | Arsenic Tr   | 14.11 | 155 |
| CDC123   | 8872   | Leukemia, MESH:D015470 | Doxorubic    | 14.11 | 12  |
| CHMP2A   | 27243  | Leukemia, MESH:D015470 | Doxorubic    | 14.11 | 12  |
| CPNE2    | 221184 | Leukemia, MESH:D015470 | Doxorubic    | 14.11 | 12  |
| DCP2     | 167227 | Leukemia, MESH:D015473 | Arsenic Tr   | 14.11 | 156 |
| DHPS     | 1725   | Leukemia, MESH:D015470 | Doxorubic    | 14.11 | 12  |
| GNAT2    | 2780   | Leukemia, MESH:D015470 | Dexameth     | 14.11 | 7   |
| GRIN3A   | 116443 | Leukemia, MESH:D015473 | arsenite G   | 14.11 | 6   |
| HAUS7    | 55559  | Leukemia, MESH:D015473 | Arsenic ar:  | 14.11 | 10  |
| LYPD6    | 130574 | Leukemia, MESH:D015470 | Resveratrc   | 14.11 | 9   |
| MRPL39   | 54148  | Leukemia, MESH:D015473 | arsenite sc  | 14.11 | 154 |
| MRPS34   | 65993  | Leukemia, MESH:D015470 | Doxorubic    | 14.11 | 12  |
| NCOR1    | 9611   | Leukemia, MESH:D007948 | 2-(2-amin    | 14.11 | 2   |
| PSMA2    | 5683   | Leukemia, MESH:D015473 | arsenite D   | 14.11 | 7   |
| PSMB7    | 5695   | Leukemia, MESH:D015470 | Dexameth     | 14.11 | 13  |
| RTCA     | 8634   | Leukemia, MESH:D015470 | Doxorubic    | 14.11 | 13  |
| SLCO1A2  | 6579   | Leukemia, MESH:D015473 | Calcitriol C | 14.11 | 153 |
| SSU72    | 29101  | Leukemia, MESH:D015470 | Dexameth     | 14.11 | 11  |

|         |        |                        |              |       |     |
|---------|--------|------------------------|--------------|-------|-----|
| TSKU    | 25987  | Leukemia, MESH:D015473 | Arsenic Tr   | 14.11 | 259 |
| VAR2    | 57176  | Leukemia, MESH:D015470 | Dexameth     | 14.11 | 7   |
| VMP1    | 81671  | Leukemia, MESH:D015470 | Doxorubic    | 14.11 | 13  |
| CRHBP   | 1393   | Leukemia, MESH:D015473 | arsenite D   | 14.1  | 153 |
| EMP3    | 2014   | Leukemia, MESH:D004915 | Doxorubic    | 14.1  | 3   |
| FLNA    | 2316   | Leukemia, MESH:D015470 | Benzene C    | 14.1  | 34  |
| GABPB2  | 126626 | Leukemia, MESH:D015473 | Arsenic Ar   | 14.1  | 158 |
| HSPB3   | 8988   | Leukemia, MESH:D015473 | Calcitriol C | 14.1  | 153 |
| MPHOSP  | 10199  | Leukemia, MESH:D015473 | Arsenic De   | 14.1  | 156 |
| MSX1    | 4487   | Leukemia, MESH:D004915 | Cytarabine   | 14.1  | 2   |
| NPY2R   | 4887   | Leukemia, MESH:D015473 | Genistein I  | 14.1  | 152 |
| PML     | 5371   | Leukemia, MESH:D007948 | Arsenic Tr   | 14.1  | 3   |
| SES3    | 143686 | Leukemia, MESH:D004915 | Cytarabine   | 14.1  | 2   |
| SRSF5   | 6430   | Leukemia, MESH:D015473 | Antimony     | 14.1  | 157 |
| VNN1    | 8876   | Leukemia, MESH:D015470 | Arsenic Tr   | 14.1  | 20  |
| APOC1   | 341    | Leukemia, MESH:D015473 | Dexameth     | 14.09 | 7   |
| FOXG1B  | 405850 | Leukemia, MESH:D015473 | arsenite D   | 14.09 | 152 |
| GLB1    | 2720   | Leukemia, MESH:D007948 | Arsenic Tr   | 14.09 | 3   |
| MAPK3   | 5595   | Leukemia, MESH:D007948 | 2-(2-amin    | 14.09 | 3   |
| MRPS2   | 51116  | Leukemia, MESH:D015473 | arsenite R   | 14.09 | 156 |
| MYLIP   | 29116  | Leukemia, MESH:D015473 | Arsenic Ca   | 14.09 | 157 |
| PLA2G2A | 5320   | Leukemia, MESH:D007948 | 2-(2-amin    | 14.09 | 2   |
| PLP1    | 5354   | Leukemia, MESH:D004915 | Cytarabine   | 14.09 | 2   |
| RARS1   | 5917   | Leukemia, MESH:D015473 | Arsenic Tr   | 14.09 | 262 |
| SERGEF  | 26297  | Leukemia, MESH:D015473 | Arsenic Ar   | 14.09 | 263 |
| TP53I3  | 9540   | Leukemia, MESH:D004915 | Daunorub     | 14.09 | 2   |
| TTPA    | 7274   | Leukemia, MESH:D004915 | Doxorubic    | 14.09 | 2   |
| CSRP3   | 8048   | Leukemia, MESH:D004915 | Doxorubic    | 14.08 | 2   |
| E2F6    | 1876   | Leukemia, MESH:D015473 | Arsenic Ar   | 14.08 | 261 |
| FAHD2A  | 51011  | Leukemia, MESH:D015473 | Arsenic Tr   | 14.08 | 260 |
| GPT2    | 84706  | Leukemia, MESH:D015473 | Arsenic Tr   | 14.08 | 261 |
| LAMTOR5 | 10542  | Leukemia, MESH:D015473 | Arsenic Tr   | 14.08 | 260 |
| NOL11   | 25926  | Leukemia, MESH:D015473 | Dexameth     | 14.08 | 155 |
| NUDT19  | 390916 | Leukemia, MESH:D015473 | Dexameth     | 14.08 | 153 |
| SDHA    | 6389   | Leukemia, MESH:D007948 | Arsenic Tr   | 14.08 | 3   |
| BEND3   | 57673  | Leukemia, MESH:D015473 | Arsenic De   | 14.07 | 155 |
| CALCR   | 799    | Leukemia, MESH:D015470 | Cytarabine   | 14.07 | 76  |
| CST1    | 1469   | Leukemia, MESH:D015470 | Etoposide    | 14.07 | 16  |
| HOXC6   | 3223   | Leukemia, MESH:D015473 | arsenite C   | 14.07 | 157 |
| KCNN4   | 3783   | Leukemia, MESH:D015473 | arsenite D   | 14.07 | 155 |
| MAPK1   | 5594   | Leukemia, MESH:D007948 | 2-(2-amin    | 14.07 | 3   |
| MGME1   | 92667  | Leukemia, MESH:D015470 | Air Polluta  | 14.07 | 8   |
| MR1     | 3140   | Leukemia, MESH:D004915 | Doxorubic    | 14.07 | 3   |
| MRPL52  | 122704 | Leukemia, MESH:D015473 | arsenite D   | 14.07 | 154 |
| PABPC3  | 5042   | Leukemia, MESH:D015470 | Arsenic Tr   | 14.07 | 18  |
| PEL1    | 57162  | Leukemia, MESH:D004915 | Cytarabine   | 14.07 | 3   |
| SMC1A   | 8243   | Leukemia, MESH:D015473 | arsenite M   | 14.07 | 156 |
| ZNF511  | 118472 | Leukemia, MESH:D015470 | Gasoline P   | 14.07 | 7   |
| ABCE1   | 6059   | Leukemia, MESH:D015470 | Docetaxel    | 14.06 | 13  |
| ADCY6   | 112    | Leukemia, MESH:D015470 | Dexameth     | 14.06 | 7   |
| CDC14B  | 8555   | Leukemia, MESH:D004915 | Doxorubic    | 14.06 | 2   |
| CMBL    | 134147 | Leukemia, MESH:D015473 | Arsenic De   | 14.06 | 158 |
| EVC     | 2121   | Leukemia, MESH:D015473 | arsenite C   | 14.06 | 153 |
| GLP2R   | 9340   | Leukemia, MESH:D015470 | Dexameth     | 14.06 | 6   |
| LSM14A  | 26065  | Leukemia, MESH:D015473 | arsenite D   | 14.06 | 156 |
| MIR34C  | 407042 | Leukemia, MESH:D015473 | Arsenic Tr   | 14.06 | 156 |
| RGS3    | 5998   | Leukemia, MESH:D015470 | Benzene C    | 14.06 | 22  |
| RGS6    | 9628   | Leukemia, MESH:D015473 | caffeic aci  | 14.06 | 5   |



|          |        |                        |              |       |     |
|----------|--------|------------------------|--------------|-------|-----|
| SCIMP    | 388325 | Leukemia, MESH:D015470 | Air Polluta  | 14.06 | 7   |
| TBPL1    | 9519   | Leukemia, MESH:D015470 | Etoposide    | 14.06 | 15  |
| ABCA4    | 24     | Leukemia, MESH:D015473 | arsenite G   | 14.05 | 7   |
| ANKRD50  | 57182  | Leukemia, MESH:D015470 | Air Polluta  | 14.05 | 7   |
| CYTH3    | 9265   | Leukemia, MESH:D015470 | Dexameth     | 14.05 | 10  |
| IL7      | 3574   | Leukemia, MESH:D015473 | Arsenic De   | 14.05 | 14  |
| KYNU     | 8942   | Leukemia, MESH:D007948 | Arsenic Tr   | 14.05 | 4   |
| MARVELD  | 153562 | Leukemia, MESH:D015470 | Dronabinc    | 14.05 | 11  |
| MITF     | 4286   | Leukemia, MESH:D007948 | 2-(2-amin    | 14.05 | 2   |
| MRPL30   | 51263  | Leukemia, MESH:D015473 | Arsenic Tr   | 14.05 | 157 |
| MTF1     | 4520   | Leukemia, MESH:D015470 | Arsenic Tr   | 14.05 | 15  |
| NDC80    | 10403  | Leukemia, MESH:D007948 | Arsenic Tr   | 14.05 | 4   |
| NUP210   | 23225  | Leukemia, MESH:D015470 | Dexameth     | 14.05 | 9   |
| PCTP     | 58488  | Leukemia, MESH:D015470 | Calcitriol C | 14.05 | 13  |
| PLCE1    | 51196  | Leukemia, MESH:D015470 | Doxorubic    | 14.05 | 13  |
| RNLS     | 55328  | Leukemia, MESH:D015473 | Arsenic Tr   | 14.05 | 154 |
| SPDL1    | 54908  | Leukemia, MESH:D015470 | Calcitriol C | 14.05 | 14  |
| ARHGAP5  | 84837  | Leukemia, MESH:D015470 | Calcitriol C | 14.04 | 5   |
| ASB7     | 140460 | Leukemia, MESH:D015473 | Arsenic De   | 14.04 | 8   |
| BMERB1   | 89927  | Leukemia, MESH:D015473 | Calcitriol C | 14.04 | 6   |
| CHD6     | 84181  | Leukemia, MESH:D015470 | Decitabine   | 14.04 | 14  |
| DCT      | 1638   | Leukemia, MESH:D004915 | Doxorubic    | 14.04 | 2   |
| MAZ      | 4150   | Leukemia, MESH:D015470 | Bortezomi    | 14.04 | 8   |
| MRPS30   | 10884  | Leukemia, MESH:D015470 | Arsenic Tr   | 14.04 | 13  |
| NDP      | 4693   | Leukemia, MESH:D015470 | Arsenic Tr   | 14.04 | 15  |
| NEDD1    | 121441 | Leukemia, MESH:D015470 | Arsenic Tr   | 14.04 | 17  |
| NPAS1    | 4861   | Leukemia, MESH:D015473 | Arsenic Tr   | 14.04 | 260 |
| NT5C     | 30833  | Leukemia, MESH:D015470 | Arsenic Tr   | 14.04 | 13  |
| ORC2     | 4999   | Leukemia, MESH:D015473 | Dexameth     | 14.04 | 156 |
| RPS6KB2  | 6199   | Leukemia, MESH:D015470 | Arsenic Tr   | 14.04 | 18  |
| SDE2     | 163859 | Leukemia, MESH:D015470 | Air Polluta  | 14.04 | 12  |
| SLAMF1   | 6504   | Leukemia, MESH:D015473 | Dexameth     | 14.04 | 5   |
| TEK      | 7010   | Leukemia, MESH:D015473 | Arsenic Tr   | 14.04 | 163 |
| TIMM21   | 29090  | Leukemia, MESH:D015470 | Calcitriol C | 14.04 | 13  |
| TINAG    | 27283  | Leukemia, MESH:D015473 | Calcitriol C | 14.04 | 6   |
| TRIM29   | 23650  | Leukemia, MESH:D015470 | Calcitriol T | 14.04 | 11  |
| ANAPC11  | 51529  | Leukemia, MESH:D015470 | Bortezomi    | 14.03 | 13  |
| BHMT2    | 23743  | Leukemia, MESH:D015470 | Decitabine   | 14.03 | 13  |
| CZIB     | 54987  | Leukemia, MESH:D015470 | Arsenic Tr   | 14.03 | 11  |
| DDB2     | 1643   | Leukemia, MESH:D015473 | Arsenic Ar   | 14.03 | 160 |
| EMD      | 2010   | Leukemia, MESH:D015470 | Arsenic Tr   | 14.03 | 13  |
| EXOSC3   | 51010  | Leukemia, MESH:D015470 | Dexameth     | 14.03 | 7   |
| GJB6     | 10804  | Leukemia, MESH:D015470 | (+)-JQ1 α    | 14.03 | 7   |
| GLT1D1   | 144423 | Leukemia, MESH:D015470 | Air Polluta  | 14.03 | 7   |
| GSC      | 145258 | Leukemia, MESH:D015473 | Arsenic Ar   | 14.03 | 263 |
| IL18BP   | 10068  | Leukemia, MESH:D015470 | Doxorubic    | 14.03 | 12  |
| ILF3     | 3609   | Leukemia, MESH:D004915 | Doxorubic    | 14.03 | 2   |
| ING4     | 51147  | Leukemia, MESH:D015470 | Doxorubic    | 14.03 | 11  |
| JPT2     | 90861  | Leukemia, MESH:D015470 | Doxorubic    | 14.03 | 13  |
| KCNC1    | 3746   | Leukemia, MESH:D015473 | Arsenic ar:  | 14.03 | 155 |
| KLHL23   | 151230 | Leukemia, MESH:D015470 | Doxorubic    | 14.03 | 15  |
| KPNA2    | 3838   | Leukemia, MESH:D007948 | Arsenic Tr   | 14.03 | 4   |
| MGAT3    | 4248   | Leukemia, MESH:D015470 | Decitabine   | 14.03 | 18  |
| MIR15B   | 406949 | Leukemia, MESH:D015473 | Arsenic Ar   | 14.03 | 263 |
| MT1G     | 4495   | Leukemia, MESH:D015473 | Arsenic Ar   | 14.03 | 160 |
| MUC5AC   | 4586   | Leukemia, MESH:D007948 | 2-(2-amin    | 14.03 | 2   |
| PLSCR2   | 57047  | Leukemia, MESH:D015470 | Dexameth     | 14.03 | 8   |
| PPP1R12B | 4660   | Leukemia, MESH:D015470 | Doxorubic    | 14.03 | 11  |

|          |          |                        |              |       |     |
|----------|----------|------------------------|--------------|-------|-----|
| RABL3    | 285282   | Leukemia, MESH:D015470 | Arsenic Tr   | 14.03 | 18  |
| SARNP    | 84324    | Leukemia, MESH:D015470 | Benzene[C    | 14.03 | 27  |
| SCAF4    | 57466    | Leukemia, MESH:D015470 | Doxorubic    | 14.03 | 11  |
| SDHAF3   | 57001    | Leukemia, MESH:D015470 | Dexameth     | 14.03 | 11  |
| SEPTIN7  | 989      | Leukemia, MESH:D015470 | Arsenic Tr   | 14.03 | 12  |
| SH3TC2   | 79628    | Leukemia, MESH:D015470 | Dexameth     | 14.03 | 10  |
| SINHCAF  | 58516    | Leukemia, MESH:D015470 | Doxorubic    | 14.03 | 11  |
| STRADA   | 92335    | Leukemia, MESH:D015470 | (+)-JQ1 c    | 14.03 | 8   |
| SYNGR2   | 9144     | Leukemia, MESH:D015470 | Bortezomi    | 14.03 | 13  |
| TNS4     | 84951    | Leukemia, MESH:D015470 | Arsenic Tr   | 14.03 | 12  |
| TTBK2    | 146057   | Leukemia, MESH:D015470 | Decitabine   | 14.03 | 12  |
| ZFYVE28  | 57732    | Leukemia, MESH:D015470 | Decitabine   | 14.03 | 13  |
| ZNF107   | 51427    | Leukemia, MESH:D015470 | Arsenic Tr   | 14.03 | 12  |
| ACP6     | 51205    | Leukemia, MESH:D015470 | Doxorubic    | 14.02 | 12  |
| ADAMTS1  | 81792    | Leukemia, MESH:D015470 | Doxorubic    | 14.02 | 12  |
| AMN      | 81693    | Leukemia, MESH:D015470 | Dronabinc    | 14.02 | 9   |
| CBLN1    | 869      | Leukemia, MESH:D015470 | Dexameth     | 14.02 | 7   |
| CLTRN    | 57393    | Leukemia, MESH:D015473 | arsenite[C   | 14.02 | 154 |
| CYTL1    | 54360    | Leukemia, MESH:D015470 | Arsenic Tr   | 14.02 | 12  |
| ENTPD7   | 57089    | Leukemia, MESH:D015470 | Doxorubic    | 14.02 | 14  |
| FBXO4    | 26272    | Leukemia, MESH:D015473 | Arsenic[Ca   | 14.02 | 9   |
| FKBP7    | 51661    | Leukemia, MESH:D015470 | Dexameth     | 14.02 | 11  |
| H2-AB1   | 14961    | Leukemia, MESH:D015470 | Dexameth     | 14.02 | 11  |
| HDAC11   | 79885    | Leukemia, MESH:D015470 | Calcitriol[T | 14.02 | 7   |
| HSPA6    | 3310     | Leukemia, MESH:D007948 | Arsenic Tr   | 14.02 | 3   |
| KMT5A    | 387893   | Leukemia, MESH:D015470 | Doxorubic    | 14.02 | 12  |
| LGALS2B  | 393486   | Leukemia, MESH:D015470 | Dexameth     | 14.02 | 5   |
| MED30    | 90390    | Leukemia, MESH:D015470 | Pentachlo    | 14.02 | 7   |
| MESP1    | 55897    | Leukemia, MESH:D015470 | Dexameth     | 14.02 | 7   |
| MICA     | 1.01E+08 | Leukemia, MESH:D015473 | Arsenic[Ar   | 14.02 | 159 |
| NR1D2    | 9975     | Leukemia, MESH:D015470 | Air Polluta  | 14.02 | 21  |
| P4HTM    | 54681    | Leukemia, MESH:D015470 | Arsenic Tr   | 14.02 | 18  |
| PALM     | 5064     | Leukemia, MESH:D015470 | Dronabinc    | 14.02 | 7   |
| PARN     | 5073     | Leukemia, MESH:D015473 | Arsenic Tr   | 14.02 | 259 |
| PHYKPL   | 85007    | Leukemia, MESH:D015473 | Calcitriol[C | 14.02 | 153 |
| PSMD9    | 5715     | Leukemia, MESH:D015470 | Doxorubic    | 14.02 | 14  |
| RAE1     | 8480     | Leukemia, MESH:D015470 | Dexameth     | 14.02 | 13  |
| SLC9A1   | 6548     | Leukemia, MESH:D015473 | Arsenic[Ar   | 14.02 | 264 |
| SV2C     | 22987    | Leukemia, MESH:D015473 | Arsenic[ar:  | 14.02 | 10  |
| TMEM164  | 84187    | Leukemia, MESH:D015470 | Doxorubic    | 14.02 | 13  |
| TMEM201  | 199953   | Leukemia, MESH:D015470 | Calcitriol[C | 14.02 | 12  |
| UBE2D1   | 7321     | Leukemia, MESH:D015470 | Arsenic Tr   | 14.02 | 17  |
| UBE2Z    | 65264    | Leukemia, MESH:D015470 | Arsenic Tr   | 14.02 | 17  |
| ZNF761   | 388561   | Leukemia, MESH:D015470 | Dexameth     | 14.02 | 9   |
| CD72     | 971      | Leukemia, MESH:D015473 | Arsenic[De   | 14.01 | 11  |
| CPNE7    | 27132    | Leukemia, MESH:D015473 | Arsenic[De   | 14.01 | 9   |
| CXCL14   | 9547     | Leukemia, MESH:D007948 | 2-(2-amin    | 14.01 | 3   |
| DDX21    | 9188     | Leukemia, MESH:D015473 | Arsenic Tr   | 14.01 | 263 |
| HAUS6    | 54801    | Leukemia, MESH:D015473 | Arsenic Tr   | 14.01 | 262 |
| INO80C   | 125476   | Leukemia, MESH:D015473 | arsenite[D   | 14.01 | 6   |
| KIAA0586 | 9786     | Leukemia, MESH:D015470 | Doxorubic    | 14.01 | 11  |
| MT2      | 17750    | Leukemia, MESH:D015473 | Arsenic[ar:  | 14.01 | 12  |
| NUBP1    | 4682     | Leukemia, MESH:D015473 | Arsenic[Ar   | 14.01 | 158 |
| PLG      | 5340     | Leukemia, MESH:D007948 | 2-(2-amin    | 14.01 | 3   |
| SMIM30   | 401397   | Leukemia, MESH:D015470 | Dexameth     | 14.01 | 10  |
| SYT5     | 6861     | Leukemia, MESH:D015473 | Arsenic[Mi   | 14.01 | 154 |
| TIMM22   | 29928    | Leukemia, MESH:D015473 | arsenite[D   | 14.01 | 8   |
| USP6     | 9098     | Leukemia, MESH:D015470 | Dexameth     | 14.01 | 10  |

|          |        |                        |             |       |     |
|----------|--------|------------------------|-------------|-------|-----|
| VPS8     | 23355  | Leukemia, MESH:D015473 | Arseniclar: | 14.01 | 10  |
| ZNF621   | 285268 | Leukemia, MESH:D015470 | Dexameth    | 14.01 | 10  |
| AARSD1   | 80755  | Leukemia, MESH:D015470 | Dronabinc   | 14    | 6   |
| C12ORF76 | 400073 | Leukemia, MESH:D015470 | Doxorubic   | 14    | 10  |
| C1ORF216 | 127703 | Leukemia, MESH:D015470 | Doxorubic   | 14    | 10  |
| CDK5R1   | 8851   | Leukemia, MESH:D015473 | Arsenic Tr  | 14    | 264 |
| DHX33    | 56919  | Leukemia, MESH:D015473 | Dexameth    | 14    | 152 |
| DPY19L2  | 283417 | Leukemia, MESH:D015470 | Doxorubic   | 14    | 10  |
| EIF3G    | 8666   | Leukemia, MESH:D015473 | Arsenic Tr  | 14    | 155 |
| ERGIC3   | 51614  | Leukemia, MESH:D015473 | Arseniclar: | 14    | 156 |
| GDF3     | 9573   | Leukemia, MESH:D015473 | Arsenic[Ge  | 14    | 155 |
| HBA1     | 3039   | Leukemia, MESH:D015470 | Doxorubic   | 14    | 15  |
| ITIH4    | 3700   | Leukemia, MESH:D015470 | Dexameth    | 14    | 9   |
| PCOLCE   | 5118   | Leukemia, MESH:D004915 | Doxorubic   | 14    | 2   |
| PLAAT3   | 11145  | Leukemia, MESH:D015470 | Decitabine  | 14    | 17  |
| POPDC3   | 64208  | Leukemia, MESH:D015473 | Arseniclar: | 14    | 156 |
| PRPF18   | 8559   | Leukemia, MESH:D015473 | Arsenic Tr  | 14    | 260 |
| RCBTB1   | 55213  | Leukemia, MESH:D015473 | Arsenic[Mi  | 14    | 157 |
| SEC14L5  | 9717   | Leukemia, MESH:D015470 | Doxorubic   | 14    | 10  |
| SNORA21  | 619505 | Leukemia, MESH:D015470 | Doxorubic   | 14    | 10  |
| SRSF3    | 6428   | Leukemia, MESH:D015470 | Dronabinc   | 14    | 11  |
| STAG3L4  | 64940  | Leukemia, MESH:D015470 | Doxorubic   | 14    | 11  |
| TLN1     | 7094   | Leukemia, MESH:D004915 | Doxorubic   | 14    | 2   |
| TRIM9    | 114088 | Leukemia, MESH:D015473 | Arseniclar: | 14    | 156 |
| ZNF140   | 7699   | Leukemia, MESH:D015470 | Doxorubic   | 14    | 10  |
| ZNF555   | 148254 | Leukemia, MESH:D015470 | Doxorubic   | 14    | 10  |
| ZNF708   | 7562   | Leukemia, MESH:D015470 | Doxorubic   | 14    | 10  |
| APOO     | 79135  | Leukemia, MESH:D015473 | Arsenic[De  | 14    | 155 |
| CACNA1C  | 8913   | Leukemia, MESH:D015473 | Arsenic[De  | 14    | 22  |
| CYP51A1  | 1595   | Leukemia, MESH:D015470 | Dexameth    | 14    | 8   |
| GRIK1    | 2897   | Leukemia, MESH:D015470 | Benzoates   | 14    | 10  |
