# Supplementary material for: High Expression of ACOT2 Predicts Worse Overall Survival and Abnormal Lipid Metabolism: A Potential Target for Acute Myeloid Leukemia
Source: Hindawi journal article supplement (doi:10.1155/2022/2669114), 2022-09-23
Supplement: f1 [file 2669114.f1.zip]

Oleic acid  
Palmitic acid  
Linoleic acid  
Stearic acid  
2-Methylbutyryl-CoA  
Arachidonic acid  
Linoleoyl-CoA  
Octanoyl-CoA  
Butyryl-CoA  
Isovaleryl-CoA  
Stearoyl-CoA  
Acetyl-CoA  
Isobutyryl-CoA  
Propionyl-CoA  
Glutaconyl-CoA  
Oleoal-CoA  
Palmitoyl-CoA  
alpha-Linolenic acid  
Coenzyme A  
Eicosapentaenoic acid  
Crotonoyl-CoA  
Pristanoyl-CoA  
Water  
Docosahexaenoic acid  
Arachidic acid  
Hexanoyl-CoA  
Dihomo-gamma-linolenic acid  
gamma-Linolenic acid  
Lauroyl-CoA  
(2E)-Dodecenoyl-CoA  
trans-2-Hexenoyl-CoA  
(2E)-Hexadecenoyl-CoA  
(2E)-Tetradecenoyl-CoA  
8Z,11Z,14Z-eicosatrienoyl-CoA  
(2E)-Decenoyl-CoA  
(2E)-Octenoyl-CoA  
3Z-dodecenoyl-CoA  
Eicosanoyl-CoA  
Alpha-Linolenoyl-CoA  
Gamma-linolenoyl-CoA  
Decanoyl-CoA (n-C10:0CoA)  
Heptadecanoyl CoA  
Arachidonyl-CoA  
Tetracosanoyl-CoA  
trans-Octadec-2-enoyl-CoA  
2-Methylhexanoyl-CoA  
Heptanoyl-CoA  
Nonanoyl-CoA  
Pentanoyl-CoA  
CAS Number  
Undecanoyl-CoA  
Cervonyl coenzyme A  
(5Z,8Z,11Z,14Z,17Z)-Icosapentaenoyl-CoA
