# Supplementary material for: High Expression of ACOT2 Predicts Worse Overall Survival and Abnormal Lipid Metabolism: A Potential Target for Acute Myeloid Leukemia
Source: J Healthc Eng. 2022 Sep 23;2022:2669114. doi: 10.1155/2022/2669114 (PMC9525752; doi:10.1155/2022/2669114)
Supplement: Supplementary Materials — Supplement Table 1. The 13299 AML-related genes from CTD. Supplement Table 2. The 53 ACOT2-related metabolites are based on Human Metabolome Database. [file 2669114.f1.zip]

Archive with 2 entries (2 files):
- Supplement Table1.pdf
- Supplement Table2.pdf
